# Supplementary material for: Changes in midlife death rates across racial and ethnic groups in the United States: systematic analysis of vital statistics
Source: PubMed Central journal article supplement — BMJ. 2018 Aug 15;362:k3096. doi: 10.1136/bmj.k3096 (PMC6092678; doi:10.1136/bmj.k3096), 2018-08-15
Supplement: woos044762.ww1.pdf [file woos044762.ww1.pdf]

### INTERPRETING TABLES S1-S7

Tables S1-S7 provide mortality rates by year, along with calculations of absolute and relative increases in mortality rates that occurred during 1999-2016. For example, the first row of Table S1 demonstrates that, in *absolute* terms, all-cause mortality rates among NH American Indians and Alaskan Natives increased by an average of 6.9 deaths per 100,000 during 1999-2016 but even more so (14.8 deaths per 100,000) in the final five years, 2012-2016. In *relative* terms, the mortality rate increased by 26.6% during 1999-2016 and 30.8% between the nadir year and 2016. The nadir, or lowest reported mortality rate, is underlined and bolded; in this example, the nadir occurred in 2000, when the all-cause mortality rate was 425.8 deaths per 100,000.

The mortality data were modeled by the Joinpoint Regression program<sup>30</sup> (see Methods). Grey cells with bolded borders denote *joinpoints* (the years when mortality trends, or slopes, changed significantly). Periods of increasing ( $APC \geq 0.0$ ) and decreasing ( $APC \leq 0.0$ ) mortality are depicted in red and green, respectively; periods of stable mortality (APC values that did not differ significantly from zero) have no color. In this example, all-cause mortality among NH American Indians and Alaskan Natives increased throughout 1999-2016 (green shading), but 2012 was a joinpoint, when the slope changed significantly. Although the average annual percentage increase in mortality (AAPC) was 1.5% per year for the entire period (1999-2016), the final APC (for 2012-2016) was significantly higher: 3.4% (95% CI = 1.5 to 5.4%) per year.

The next row (NH Asians and Pacific Islanders) illustrates *retrogression*: although mortality in this population decreased from 1999 to 2016 (the 2016 rate was 18.0% below that of 1999, mortality decreased by an average of 1.9 deaths per 100,000, and the AAPC was -1.3%), the progress (green shading) ended in 2009. The caret (^) in the last column indicates that the slope for the 1999-2016 interval, although not significantly positive (APC 95% CI = -0.5 to 0.8%), was nonetheless a significant change from the downward pre-2009 slope.

TABLE S1. MORTALITY FROM ALL-CAUSES, EXTERNAL CAUSES, AND ORGAN DISEASE SYSTEMS, AGES 25-64 YEARS, BY RACE-ETHNICITY, 1999-2016

| Racial and ethnic groups                            | Age-adjusted mortality rates (deaths per 100,000), by year |              |       |       |              |       |       |             |       |             |             |              |              |             |       |              |              |       | Changes in mortality rates                           |           |                          |               |                  |                                   |
|-----------------------------------------------------|------------------------------------------------------------|--------------|-------|-------|--------------|-------|-------|-------------|-------|-------------|-------------|--------------|--------------|-------------|-------|--------------|--------------|-------|------------------------------------------------------|-----------|--------------------------|---------------|------------------|-----------------------------------|
|                                                     |                                                            |              |       |       |              |       |       |             |       |             |             |              |              |             |       |              |              |       | Average absolute year-to-year changes (per 100,000)† |           | Proportional (%) changes |               |                  |                                   |
|                                                     | 1999                                                       | 2000         | 2001  | 2002  | 2003         | 2004  | 2005  | 2006        | 2007  | 2008        | 2009        | 2010         | 2011         | 2012        | 2013  | 2014         | 2015         | 2016  | 1999-2016                                            | 2012-2016 | 2016 vs 1999             | 2016 vs nadir | Fitted model‡    |                                   |
|                                                     |                                                            |              |       |       |              |       |       |             |       |             |             |              |              |             |       |              |              |       |                                                      |           |                          |               | AAPC (1999-2016) | Final APC (95% CI)                |
| <b>ALL-CAUSE MORTALITY (A00-Y89)</b>                |                                                            |              |       |       |              |       |       |             |       |             |             |              |              |             |       |              |              |       |                                                      |           |                          |               |                  |                                   |
| NH AIAN                                             | 439.8                                                      | <b>425.8</b> | 444.6 | 453.0 | 474.1        | 458.7 | 477.0 | 464.4       | 462.2 | 471.9       | 477.2       | 479.7        | 482.7        | 492.6       | 502.6 | 526.0        | 548.7        | 556.8 | 6.88                                                 | 14.82     | 26.6*                    | 30.8*         | 1.5*             | 3.4 (1.5 to 5.4)^                 |
| NH API                                              | 177.6                                                      | 174.1        | 173.1 | 164.8 | 160.4        | 153.9 | 155.7 | 152.4       | 146.7 | 144.3       | 142.1       | 141.2        | 142.8        | 143.8       | 143.2 | 139.9        | <b>139.3</b> | 145.6 | -1.88                                                | 0.56      | -18.0*                   | 4.5*          | -1.3*            | 0.2 (-0.5 to 0.8)^                |
| NH blacks                                           | 656.1                                                      | 646.7        | 636.7 | 629.6 | 623.8        | 598.1 | 593.4 | 577.8       | 558.1 | 535.2       | 523.4       | 503.5        | 496.1        | 491.3       | 492.8 | <b>490.2</b> | 495.9        | 509.8 | -8.61                                                | 2.74      | -22.3*                   | 4.0*          | -1.5*            | 2.1 (-0.6 to 4.9)                 |
| NH whites                                           | 338.9                                                      | 340.6        | 342.4 | 341.5 | 340.6        | 333.9 | 336.3 | 334.5       | 330.9 | 333.0       | 332.2       | <b>328.0</b> | 332.7        | 332.4       | 335.5 | 341.3        | 347.1        | 356.6 | 1.04                                                 | 4.78      | 5.2*                     | 8.7*          | 0.2*             | 1.9 (1.2 to 2.6)^                 |
| Hispanics                                           | 284.3                                                      | 281.7        | 279.5 | 274.6 | <b>272.8</b> | 260.5 | 261.2 | 255.2       | 247.6 | 241.0       | 238.0       | 228.9        | <b>224.6</b> | 226.5       | 226.1 | 225.7        | 226.8        | 234.8 | -2.91                                                | 2.05      | -17.4*                   | 4.6*          | -1.2*            | 0.6 (-0.2 to 1.3)^                |
| <b>EXTERNAL CAUSES (V01-Y89)</b>                    |                                                            |              |       |       |              |       |       |             |       |             |             |              |              |             |       |              |              |       |                                                      |           |                          |               |                  |                                   |
| NH AIAN                                             | 99.8                                                       | <b>94.4</b>  | 94.5  | 108.9 | 109.2        | 107.4 | 115.8 | 120.0       | 114.4 | 114.6       | 120.6       | 119.9        | 125.6        | 133.2       | 127.4 | 138.2        | 147.6        | 157.2 | 3.38                                                 | 6.32      | 57.5*                    | 66.5*         | 2.5*             | 2.5 (2.1 to 3.0) <sup>NIP</sup>   |
| NH API                                              | 23.6                                                       | 22.9         | 21.5  | 21.6  | 22.3         | 21.9  | 21.7  | 21.5        | 21.5  | 19.8        | <b>19.4</b> | 20.5         | 20.5         | 21.3        | 20.6  | 20.3         | 20.4         | 22.0  | -0.09                                                | 0.30      | -6.8                     | 13.4*         | -0.5             | 0.7 (-0.5 to 1.9)^                |
| NH blacks                                           | 76.6                                                       | 76.6         | 76.4  | 78.1  | 77.6         | 77.1  | 80.5  | 83.2        | 79.5  | 72.6        | 69.9        | <b>68.0</b>  | 69.9         | 71.5        | 72.9  | 73.3         | 81.6         | 94.1  | 1.03                                                 | 4.84      | 22.8*                    | 38.4*         | 1.3*             | 12.5 (7.4 to 17.8)^               |
| NH whites                                           | 52.8                                                       | 53.6         | 56.1  | 59.8  | 61.3         | 63.1  | 65.3  | 68.3        | 70.6  | 71.4        | 70.0        | 71.6         | 74.5         | 75.2        | 76.0  | 78.9         | 84.7         | 93.6  | 2.40                                                 | 3.82      | 77.3*                    | NA            | 3.5*             | 9.6 (4.9 to 14.6)^                |
| Hispanics                                           | 47.6                                                       | 46.6         | 48.0  | 48.2  | 48.8         | 46.9  | 48.2  | 49.3        | 47.5  | 44.3        | 42.2        | <b>40.6</b>  | 41.2         | 41.5        | 41.8  | 42.2         | 45.1         | 51.4  | 0.22                                                 | 2.03      | 7.9*                     | 26.5*         | 0.4              | 10.0 (4.7 to 15.6)^               |
| <b>ORGAN DISEASES</b>                               |                                                            |              |       |       |              |       |       |             |       |             |             |              |              |             |       |              |              |       |                                                      |           |                          |               |                  |                                   |
| <b>Diseases of the circulatory system (I00-I99)</b> |                                                            |              |       |       |              |       |       |             |       |             |             |              |              |             |       |              |              |       |                                                      |           |                          |               |                  |                                   |
| NH AIAN                                             | 91.7                                                       | 93.2         | 94.1  | 90.8  | 101.2        | 90.2  | 96.7  | 91.1        | 89.1  | <b>87.2</b> | 89.3        | 88.9         | 90.1         | <b>87.2</b> | 93.5  | 94.1         | 102.0        | 97.7  | 0.35                                                 | 1.51      | 6.5                      | 12.0*         | 0.4              | 3.3 (-0.3 to 7.0)^                |
| NH API                                              | 52.3                                                       | 49.6         | 47.3  | 45.4  | 45.2         | 41.0  | 42.1  | 40.8        | 38.1  | 37.7        | <b>36.7</b> | 35.3         | 35.9         | 36.0        | 36.9  | 35.3         | 35.1         | 35.7  | -0.97                                                | -0.03     | -31.7*                   | NA            | -2.1*            | -0.2 (-1.1 to 0.6)^               |
| NH blacks                                           | 202.1                                                      | 198.9        | 194.9 | 191.8 | <b>190.1</b> | 180.7 | 177.3 | 170.6       | 164.2 | 159.1       | 154.7       | 149.7        | 145.3        | 145.2       | 145.6 | 144.9        | 145.4        | 147.3 | -3.22                                                | 0.40      | -27.1*                   | NA            | -1.9*            | 0.2 (-0.1 to 0.6)^                |
| NH whites                                           | 91.0                                                       | 89.7         | 86.8  | 86.2  | 84.4         | 81.0  | 80.0  | 78.5        | 76.3  | 76.0        | 74.1        | 73.6         | 73.5         | <b>73.2</b> | 73.4  | 74.2         | 74.6         | 75.6  | -0.91                                                | 0.41      | -17.0*                   | 3.2*          | -1.1*            | 0.6 (0.2 to 0.9)^                 |
| Hispanics                                           | 70.6                                                       | 68.1         | 64.5  | 66.4  | 63.1         | 61.2  | 60.5  | 58.3        | 56.3  | 53.2        | 52.9        | 51.1         | 49.4         | <b>48.8</b> | 48.7  | 48.5         | 48.9         | 49.3  | -1.25                                                | -0.01     | -30.1*                   | NA            | -2.1*            | 0.4 (-1.1 to 1.8)^                |
| <b>Diseases of the digestive system (K00-K92)</b>   |                                                            |              |       |       |              |       |       |             |       |             |             |              |              |             |       |              |              |       |                                                      |           |                          |               |                  |                                   |
| NH AIAN                                             | 55.6                                                       | <b>53.0</b>  | 55.5  | 56.7  | 58.1         | 55.8  | 55.7  | <b>54.8</b> | 63.2  | 65.7        | 60.0        | 66.1         | 66.3         | 69.2        | 73.2  | 74.9         | 79.8         | 79.0  | 1.38                                                 | 2.54      | 42.1*                    | 49.1*         | 2.3*             | 3.4 (2.5 to 4.2)^                 |
| NH API                                              | 5.5                                                        | 6.2          | 5.8   | 5.9   | 5.3          | 5.3   | 5.8   | 5.9         | 5.3   | 5.6         | 5.7         | 5.5          | 5.5          | 5.3         | 5.5   | 5.2          | 5.6          | 5.7   | 0.01                                                 | 0.05      | 2.9                      | NA            | -0.3             | -0.3 (-0.8 to 0.1) <sup>NIP</sup> |
| NH blacks                                           | 28.6                                                       | 28.6         | 28.2  | 25.8  | 26.4         | 24.9  | 23.3  | 22.0        | 22.5  | <b>21.6</b> | 21.1        | 20.6         | 20.8         | 20.1        | 20.7  | 19.9         | 19.7         | 19.6  | -0.53                                                | -0.24     | -31.4*                   | NA            | -2.4*            | -1.1 (-1.8 to -0.3)^              |
| NH whites                                           | 17.6                                                       | 17.8         | 18.2  | 18.4  | 18.5         | 18.2  | 18.3  | 18.6        | 19.0  | 19.5        | 19.8        | 20.2         | 20.8         | 21.3        | 21.7  | 22.1         | 22.9         | 22.6  | 0.30                                                 | 0.36      | 28.8*                    | NA            | 1.6*             | 2.1 (2.0 to 2.3)                  |
| Hispanics                                           | 24.9                                                       | 24.5         | 23.8  | 23.9  | 23.6         | 21.9  | 21.7  | 21.6        | 22.0  | 22.1        | 21.8        | 21.5         | 21.9         | 22.3        | 21.5  | 22.2         | 21.8         | 21.6  | -0.20                                                | -0.06     | -13.5*                   | NA            | -0.8*            | 0.0 (-0.4 to 0.3)^                |

| Diseases of the respiratory system (J00-J98)            |      |             |      |             |            |             |      |             |      |      |             |             |             |            |      |             |      |      |       |      |        |        |                   |                                   |
|---------------------------------------------------------|------|-------------|------|-------------|------------|-------------|------|-------------|------|------|-------------|-------------|-------------|------------|------|-------------|------|------|-------|------|--------|--------|-------------------|-----------------------------------|
| NH AIAN                                                 | 22.2 | 22.9        | 21.8 | <b>21.2</b> | 26.7       | 21.6        | 23.4 | 21.4        | 23.2 | 28.6 | 30.6        | 25.1        | 25.4        | 24.5       | 24.8 | 28.9        | 27.1 | 27.1 | 0.29  | 0.35 | 22.0   | 27.8*  | 1.4*              | 1.4 (0.5 to 2.3) <sup>NJP</sup>   |
| NH API                                                  | 5.8  | 6.1         | 5.8  | 5.1         | 5.2        | 4.5         | 4.9  | 4.4         | 4.4  | 4.8  | 5.5         | <b>4.2</b>  | 4.8         | 4.5        | 5.1  | 5.2         | 4.6  | 5.1  | -0.04 | 0.08 | -11.7  | 21.5*  | -1.1              | 1.1 (-0.8 to 2.9) <sup>^</sup>    |
| NH blacks                                               | 29.1 | 28.5        | 27.2 | 26.4        | 26.5       | 25.0        | 25.5 | 23.5        | 23.1 | 24.7 | 24.6        | <b>22.2</b> | 22.8        | 22.6       | 24.7 | 24.9        | 24.2 | 25.2 | -0.23 | 0.47 | -13.5  | 13.1*  | -0.7*             | 1.8 (0.0 to 3.7) <sup>^</sup>     |
| NH whites                                               | 18.7 | 18.6        | 18.5 | 18.2        | 18.5       | 17.7        | 18.6 | <b>17.7</b> | 17.7 | 18.9 | 20.3        | 18.3        | 19.5        | 18.8       | 20.3 | 21.3        | 20.4 | 21.1 | 0.14  | 0.32 | 12.9*  | 19.3*  | 0.7*              | 1.6 (0.8 to 2.5) <sup>^</sup>     |
| Hispanics                                               | 10.4 | 10.7        | 9.8  | 10.0        | 9.9        | 9.3         | 9.7  | 8.9         | 8.4  | 9.1  | 11.2        | 9.0         | 8.6         | <b>8.6</b> | 9.4  | 10.1        | 8.7  | 9.5  | -0.05 | 0.17 | -8.5   | 10.9*  | -0.7              | -0.7 (-1.4 to 0.1) <sup>NJP</sup> |
| Endocrine, nutritional and metabolic diseases (E00-E88) |      |             |      |             |            |             |      |             |      |      |             |             |             |            |      |             |      |      |       |      |        |        |                   |                                   |
| NH AIAN                                                 | 31.9 | <b>26.9</b> | 27.8 | 30.7        | 31.8       | 30.1        | 32.3 | 32.0        | 27.7 | 27.9 | 29.5        | 32.8        | 34.5        | 34.5       | 33.5 | 36.6        | 37.5 | 39.4 | 0.44  | 0.97 | 23.5*  | 46.3*  | 1.5*              | 1.5 (0.8 to 2.3) <sup>NJP</sup>   |
| NH API                                                  | 6.0  | 5.9         | 6.3  | 5.9         | 6.3        | 6.1         | 6.2  | 6.5         | 6.4  | 6.0  | 6.3         | 5.8         | 5.9         | 6.4        | 6.5  | 6.2         | 6.3  | 6.8  | 0.05  | 0.19 | 15.1   | NA     | 0.4               | 0.4 (0.0 to 0.7) <sup>NJP</sup>   |
| NH blacks                                               | 33.3 | 32.1        | 32.6 | 33.7        | 33.3       | 32.0        | 32.2 | 31.8        | 30.9 | 28.6 | <b>28.5</b> | 28.5        | 29.7        | 28.6       | 29.8 | 30.7        | 31.8 | 32.2 | -0.07 | 0.50 | -3.5   | 12.9   | -0.2              | 2.0 (1.1 to 2.9)                  |
| NH whites                                               | 12.7 | 13.3        | 13.5 | <b>14.0</b> | 14.1       | 13.9        | 14.2 | 14.2        | 13.9 | 13.9 | 14.0        | 13.7        | 14.7        | 14.4       | 14.9 | 15.4        | 16.0 | 16.1 | 0.20  | 0.27 | 26.4*  | NA     | 1.4*              | 2.5 (1.8 to 3.3) <sup>^</sup>     |
| Hispanics                                               | 16.2 | 16.2        | 16.1 | 16.0        | 16.7       | 14.8        | 15.7 | 14.3        | 14.1 | 13.9 | 13.3        | 13.3        | <b>13.2</b> | 13.4       | 13.6 | 13.7        | 13.6 | 14.4 | -0.11 | 0.23 | -11.3* | 8.9*   | -1.0*             | 1.5 (-0.7 to 3.8) <sup>^</sup>    |
| Diseases of the nervous system (G00-G98)                |      |             |      |             |            |             |      |             |      |      |             |             |             |            |      |             |      |      |       |      |        |        |                   |                                   |
| NH AIAN                                                 | 5.5  | 5.9         | 7.2  | <b>5.4</b>  | 5.8        | 7.3         | 8.5  | 7.5         | 7.7  | 8.4  | 9.2         | 7.6         | 9.2         | 7.7        | 9.9  | 9.5         | 11.0 | 10.9 | 0.32  | 0.36 | 99.8*  | 19.5*  | 3.7*              | 3.7 (2.7 to 4.8) <sup>NJP</sup>   |
| NH API                                                  | 2.2  | 2.3         | 2.2  | 2.3         | 2.3        | <b>1.9</b>  | 2.4  | 2.3         | 2.2  | 2.7  | 2.3         | 2.5         | 2.3         | 2.7        | 3.1  | 2.7         | 2.9  | 2.8  | 0.04  | 0.10 | 27.6   | 47.5   | 1.7*              | 1.7 (0.9 to 2.6) <sup>NJP</sup>   |
| NH blacks                                               | 10.2 | 10.5        | 10.6 | 10.6        | 11.1       | 10.7        | 11.2 | 11.2        | 11.0 | 11.3 | 11.6        | 11.0        | 11.0        | 11.9       | 11.6 | 12.6        | 12.3 | 12.2 | 0.12  | 0.24 | 20.4*  | NA     | 1.0*              | 1.0 (0.7 to 1.2) <sup>NJP</sup>   |
| NH whites                                               | 7.1  | 7.6         | 7.6  | 7.8         | 7.9        | 7.9         | 8.3  | 8.3         | 8.4  | 8.6  | 8.8         | 8.8         | 8.8         | 8.9        | 9.3  | 9.3         | 9.5  | 9.8  | 0.16  | 0.22 | 38.9*  | NA     | 1.6*              | 1.6 (1.5 to 1.8) <sup>NJP</sup>   |
| Hispanics                                               | 3.7  | 4.2         | 3.9  | 4.3         | 4.6        | 4.3         | 4.5  | 4.5         | 4.6  | 4.5  | 4.6         | 4.5         | 4.6         | 4.5        | 5.0  | 4.8         | 5.2  | 5.2  | 0.09  | 0.12 | 40.4*  | NA     | 1.4*              | 1.4 (1.0 to 1.8) <sup>NJP</sup>   |
| Mental and behavioral disorders (F01-F99)               |      |             |      |             |            |             |      |             |      |      |             |             |             |            |      |             |      |      |       |      |        |        |                   |                                   |
| NH AIAN                                                 | 17.7 | 14.2        | 16.6 | 14.7        | 18.4       | 18.4        | 17.5 | <b>18.9</b> | 13.3 | 13.7 | <b>12.1</b> | <b>11.7</b> | 13.1        | 14.6       | 13.8 | 17.9        | 17.7 | 17.7 | 0.00  | 0.92 | -0.1   | 51.8*  | 0.9               | 7.2 (3.2 to 11.2)                 |
| NH API                                                  | 0.7  | 0.9         | 0.8  | 1.1         | <b>1.2</b> | 1.1         | 1.2  | 1.5         | 1.0  | 1.0  | 1.0         | 0.9         | 0.9         | 1.2        | 1.1  | 1.1         | 1.1  | 1.2  | 0.03  | 0.06 | 68.8   | NA     | 2.3               | -0.6 (-2.8 to 1.7)                |
| NH blacks                                               | 9.8  | 9.3         | 9.7  | 9.1         | 9.0        | 8.5         | 8.5  | 9.3         | 6.9  | 6.0  | 5.8         | 5.9         | 5.7         | <b>5.7</b> | 6.0  | 6.0         | 5.9  | 6.5  | -0.19 | 0.15 | -33.6* | 14.5*  | -2.6*             | 1.7 (0.5 to 3.0) <sup>^</sup>     |
| NH whites                                               | 4.6  | 4.8         | 5.0  | 5.3         | 5.6        | 6.0         | 6.1  | 6.5         | 5.1  | 5.1  | <b>4.9</b>  | 5.3         | 5.5         | 5.8        | 6.0  | 6.3         | 6.7  | 7.4  | 0.17  | 0.37 | 61.1*  | 51.0*  | 2.7*              | 5.7 (4.2 to 7.3) <sup>^</sup>     |
| Hispanics                                               | 5.5  | 5.1         | 4.9  | 5.2         | 5.2        | 4.8         | 5.5  | 5.4         | 3.7  | 3.5  | 3.3         | 3.3         | <b>3.2</b>  | 3.3        | 3.8  | 3.6         | 3.6  | 3.9  | -0.09 | 0.14 | -29.1* | 22.0*  | -1.8              | 3.2 (0.9 to 5.4) <sup>^</sup>     |
| Diseases of the genitourinary system (N00-N98)          |      |             |      |             |            |             |      |             |      |      |             |             |             |            |      |             |      |      |       |      |        |        |                   |                                   |
| NH AIAN                                                 | 8.1  | 8.7         | 10.5 | 9.2         | 9.1        | 8.2         | 7.5  | 9.4         | 8.3  | 9.7  | 8.7         | 8.6         | <b>7.3</b>  | 7.7        | 8.5  | 10.5        | 10.1 | 10.4 | 0.14  | 0.62 | 29.0*  | 42.5*  | 0.4               | 0.4 (-0.7 to 1.5) <sup>NJP</sup>  |
| NH API                                                  | 2.4  | 2.3         | 2.8  | 2.5         | 2.1        | 2.2         | 2.4  | 2.4         | 2.3  | 2.5  | 2.2         | 2.3         | 2.0         | 2.1        | 2.3  | 2.1         | 2.3  | 2.3  | -0.01 | 0.06 | -7.9   | NA     | -0.7              | -0.7 (-1.4 to 0.0) <sup>NJP</sup> |
| NH blacks                                               | 14.7 | 15.2        | 15.5 | 15.5        | 16.4       | <b>16.2</b> | 15.6 | 15.5        | 15.1 | 14.9 | 14.3        | 14.3        | 12.9        | 13.2       | 13.0 | <b>12.7</b> | 13.6 | 13.8 | -0.05 | 0.18 | -6.1   | 8.1    | -0.4              | 5.3 (-1.5 to 12.5) <sup>^</sup>   |
| NH whites                                               | 3.4  | 3.5         | 3.6  | 3.7         | 3.9        | 3.9         | 3.9  | 4.1         | 4.0  | 4.0  | 4.1         | 4.1         | <b>3.8</b>  | 3.9        | 4.0  | 4.1         | 4.4  | 4.6  | 0.07  | 0.14 | 35.7*  | 18.9*  | 1.8*              | 5.6 (2.0 to 9.3) <sup>^</sup>     |
| Hispanics                                               | 4.7  | 4.4         | 4.5  | 4.6         | 4.9        | 4.8         | 4.7  | 5.0         | 4.8  | 5.1  | 5.2         | 4.8         | 4.2         | 4.4        | 4.2  | 4.2         | 4.4  | 4.7  | 0.00  | 0.10 | -0.8   | NA     | 0.2               | 4.5 (-1.3 to 10.7) <sup>^</sup>   |
| Pregnancy, childbirth and the puerperium (O00-O99)      |      |             |      |             |            |             |      |             |      |      |             |             |             |            |      |             |      |      |       |      |        |        |                   |                                   |
| NH AIAN                                                 | UR   | UR          | UR   | UR          | UR         | UR          | UR   | UR          | UR   | UR   | UR          | UR          | UR          | UR         | UR   | UR          | UR   | UR   | NA    | NA   | NA     | NA     | Insufficient data |                                   |
| NH API                                                  | UR   | UR          | UR   | UR          | 0.3        | 0.3         | 0.4  | 0.5         | 0.4  | 0.3  | 0.3         | 0.4         | 0.4         | 0.3        | 0.4  | 0.4         | 0.4  | 0.4  | NA    | 0.06 | NA     | NA     | Insufficient data |                                   |
| NH blacks                                               | 0.6  | 0.6         | 0.6  | 0.6         | 0.8        | 0.9         | 1.0  | 1.0         | 0.9  | 1.0  | 1.1         | 1.1         | 1.2         | 1.4        | 1.5  | 1.5         | 1.5  | 1.6  | 0.06  | 0.34 | 167.9* | NA     | 6.4*              | 6.4 (5.6 to 7.3) <sup>NJP</sup>   |
| NH whites                                               | 0.1  | 0.1         | 0.1  | 0.1         | 0.2        | 0.2         | 0.3  | 0.3         | 0.3  | 0.3  | 0.4         | 0.3         | 0.4         | 0.4        | 0.5  | 0.5         | 0.5  | 0.6  | 0.03  | 0.12 | 411.0* | NA     | 12.2*             | 7.5 (4.2 to 10.9) <sup>^</sup>    |
| Hispanics                                               | 0.3  | 0.3         | 0.3  | <b>0.3</b>  | 0.3        | 0.4         | 0.4  | 0.4         | 0.4  | 0.4  | 0.5         | 0.4         | 0.3         | 0.5        | 0.5  | 0.5         | 0.5  | 0.5  | 0.02  | 0.15 | 101.5* | 106.3* | 3.3*              | 3.3 (2.1 to 4.6) <sup>NJP</sup>   |

†Average year-to-year changes (from 1999 to 2016) in absolute mortality rates (deaths per 100,000). See text for more details.

‡Slopes from fitted model, in which joinpoint analysis<sup>30</sup> was used to plot trend lines that best fit the 17 annual mortality rates (see Methods). *Joinpoints* (grey boxes) are points of inflection when mortality trend lines changed significantly. *APC* = annual percentage rate change, the slope for the interval(s) between joinpoints. *AAPC* = average annual percent change, the slope for the entire (1999-2016) period based on the weighted average of the APCs. For brevity, the table presents APC values only for the final interval ending in 2016 (or the entire 1999-2016 period when there are no joinpoints). Table S8 in this supplement provides all AAPC values, APC values for every segment, and related 95% confidence intervals and p values. The Joinpoint Chartbook in this supplement displays the fitted model for each cause of death and racial-ethnic group.

\*Statistically significant changes in mortality rates (p < 0.05)

^APC (slope) for interval ending in 2016 differed significantly (p < 0.05) from slope of preceding period. *NJP* = no joinpoint (i.e., the fitted slope had no significant inflection between 1999 and 2016). Values equal the AAPC for the entire 1999-2016 period.

95% CI = 95% confidence interval

NH AIAN = non-Hispanic American Indians and Alaskan Native

NH API = non-Hispanic Asians and Pacific Islanders

NA = Not applicable; data were inadequate for calculation

NJP = No joinpoint; no significant changes in slope occurred and values represent the APC for the entire period of 1999-2016

UR = Unreliable data; fewer than 20 deaths from the specified cause of death in the given year and racial-ethnic group.

Notes Grey cells with bolded borders denote joinpoints, which demarcate changes in the APC (slope). Green shading denotes decreasing mortality (negative APC values that differ significantly from zero [ $p < 0.05$ ]). Red shading denotes increasing mortality (positive APC values that differ significantly from zero [ $p < 0.05$ ]). No shading indicates statistically stable trends (APC values that did not differ significantly from zero). Nadirs (mortality rates significantly below 2016 rates) are underlined and bolded. Between 1999 and 2016, NH whites (only) ages 25-64 years also experienced statistically significant increases in age-adjusted mortality from diseases of the blood and immune mechanism (D50-D89; 14.7% increase; AAPC = 0.5% [0.0 to 0.9%]) and skin diseases (L00-L98; 65.0% increase; AAPC = 2.6% [1.8 to 3.3%]), as well as post-nadir increases in mortality from congenital disorders (Q00-Q99; 21.4% increase from nadir 2009; post-2011 APC = 4.0% [2.1 to 5.9%]). Post-nadir increases in mortality from symptoms, signs and abnormal clinical and laboratory findings (R00-R99) were statistically significant among NH blacks, NH whites, and Hispanics on two-point comparisons but were not confirmed on joinpoint analysis and are not presented here. No statistically significant increases by race-ethnicity (on two-point analysis) were reported for mortality from neoplasms (C00-D48), infectious and parasitic diseases (A00-B99), and diseases of the musculoskeletal system and connective tissue (M00-M99). Data were suppressed by race-ethnicity (unreliable) for diseases of the eye and adnexa (H00-H57), diseases of the ear and mastoid process (H60-H93), conditions originating in the perinatal period (P00-P96), and codes for special purposes (U00-U99). More detailed data are provided in Table S1 of the online supplement.



TABLE S2. MORTALITY RATES BY LEADING CAUSES, NON-HISPANIC WHITES, AGES 25-64 YEARS, 1999-2016

|                                                                         | Age-adjusted mortality rates (deaths per 100,000), by year |               |               |           |                  |                    |      |      |      |      |      |      |      |      |      |      |      |           | Changes in mortality rates             |              |                          |                  |                    |                                 | Excess deaths |
|-------------------------------------------------------------------------|------------------------------------------------------------|---------------|---------------|-----------|------------------|--------------------|------|------|------|------|------|------|------|------|------|------|------|-----------|----------------------------------------|--------------|--------------------------|------------------|--------------------|---------------------------------|---------------|
|                                                                         |                                                            |               |               |           |                  |                    |      |      |      |      |      |      |      |      |      |      |      |           | Average absolute year-to-year changes† |              | Proportional (%) changes |                  |                    |                                 |               |
|                                                                         | 2016 vs 1999                                               | 2016 vs nadir | Fitted model‡ |           |                  |                    |      |      |      |      |      |      |      |      |      |      |      |           |                                        |              |                          |                  |                    |                                 |               |
|                                                                         |                                                            |               | 1999-2016     | 2012-2016 | AAPC (1999-2016) | Final APC (95% CI) |      |      |      |      |      |      |      |      |      |      |      |           |                                        |              |                          |                  |                    |                                 |               |
| 1999                                                                    | 2000                                                       | 2001          | 2002          | 2003      | 2004             | 2005               | 2006 | 2007 | 2008 | 2009 | 2010 | 2011 | 2012 | 2013 | 2014 | 2015 | 2016 | 1999-2016 | 2012-2016                              | 2016 vs 1999 | 2016 vs nadir            | AAPC (1999-2016) | Final APC (95% CI) |                                 |               |
| <b>External causes of morbidity and mortality (V01-Y89)</b>             |                                                            |               |               |           |                  |                    |      |      |      |      |      |      |      |      |      |      |      |           |                                        |              |                          |                  |                    |                                 |               |
| Drug overdoses (X40-X44)                                                | 6.2                                                        | 6.8           | 7.7           | 10.1      | 11.4             | 12.6               | 14.2 | 16.7 | 18.1 | 18.7 | 19.2 | 20.3 | 22.4 | 22.4 | 24.0 | 26.3 | 30.1 | 37.0      | 1.81                                   | 2.91         | 494.3*                   | NA               | 11.1*              | 20.0 (6.2 to 35.7)^             | 33,003        |
| Alcohol poisoning (X45)                                                 | 0.2                                                        | 0.2           | 0.2           | 0.2       | 0.2              | 0.2                | 0.2  | 0.2  | 0.7  | 1.1  | 1.1  | 1.2  | 1.2  | 1.2  | 1.2  | 1.2  | 1.2  | 1.2       | 0.06                                   | 0.01         | 674.5*                   | NA               | 12.3*              | 2.1 (-0.5 to 4.9)^              | 1,146         |
| Pedestrian/cyclist/motorcycle injury (V01-V29)                          | 3.4                                                        | 3.5           | 3.8           | 4.0       | 4.1              | 4.4                | 4.6  | 4.9  | 4.8  | 4.9  | 4.4  | 4.3  | 4.4  | 4.7  | 4.3  | 4.3  | 4.7  | 5.1       | 0.10                                   | 0.14         | 50.1*                    | NA               | 2.4*               | 9.4 (-1.4 to 21.5)              | 1,404         |
| Misc. land/other transport accidents (V80-V99) <sup>1</sup>             | 6.7                                                        | 6.8           | 6.5           | 6.1       | 5.9              | 6.3                | 6.5  | 6.6  | 6.5  | 6.3  | 5.9  | 6.2  | 5.9  | 6.5  | 6.6  | 6.6  | 7.0  | 7.2       | 0.03                                   | 0.27         | 7.8*                     | 23.5*            | 0.2                | 2.8 (1.5 to 4.0)                | 561           |
| Other forms of accidental poisoning (X46-X49) <sup>2</sup>              | 0.3                                                        | 0.3           | 0.3           | 0.3       | 0.3              | 0.3                | 0.3  | 0.3  | 0.4  | 0.4  | 0.5  | 0.4  | 0.5  | 0.5  | 0.5  | 0.5  | 0.6  | 0.7       | 0.02                                   | 0.03         | 139.1*                   | NA               | 5.1*               | 5.1 (4.2 to 6.0) <sup>NIP</sup> | 410           |
| Falls, drowning, fire (W00-W19, W65-W74, X00-X09) <sup>3</sup>          | 3.7                                                        | 3.8           | 3.8           | 3.9       | 4.0              | 4.1                | 4.2  | 4.2  | 4.3  | 4.2  | 4.2  | 4.4  | 4.2  | 4.2  | 4.3  | 4.4  | 4.3  | 4.4       | 0.04                                   | 0.03         | 19.4*                    | NA               | 1.0*               | 0.2 (-0.1 to 0.6)^              | 768           |
| Suicide (X60-X84)                                                       | 15.6                                                       | 15.7          | 16.6          | 17.3      | 17.4             | 17.7               | 17.7 | 18.4 | 19.2 | 20.0 | 20.4 | 21.1 | 21.6 | 22.1 | 22.1 | 22.7 | 23.5 | 23.3      | 0.45                                   | 0.35         | 49.4*                    | NA               | 2.5*               | 1.8 (1.0 to 2.5)^               | 8,300         |
| <b>Diseases of the circulatory system (I00-I99)</b>                     |                                                            |               |               |           |                  |                    |      |      |      |      |      |      |      |      |      |      |      |           |                                        |              |                          |                  |                    |                                 |               |
| Hypertensive diseases (I10-I15)                                         | 3.8                                                        | 4.0           | 4.3           | 4.8       | 5.2              | 5.3                | 5.5  | 5.8  | 5.8  | 6.4  | 6.6  | 6.6  | 7.0  | 7.2  | 7.7  | 8.2  | 8.4  | 8.8       | 0.29                                   | 0.36         | 129.8*                   | NA               | 5.1*               | 4.2 (3.9 to 4.6)^               | 5,318         |
| Other heart disease (I30-I51) <sup>4</sup>                              | 14.2                                                       | 13.8          | 13.7          | 13.8      | 13.6             | 13.3               | 13.4 | 13.4 | 13.2 | 13.0 | 13.1 | 13.3 | 13.4 | 13.3 | 13.8 | 14.1 | 14.6 | 15.0      | 0.05                                   | 0.33         | 6.0*                     | 15.6*            | 0.4*               | 2.9 (2.1 to 3.8)^               | 916           |
| Venous/lymphatic diseases (I80-I89)                                     | 0.7                                                        | 0.9           | 0.8           | 0.9       | 0.9              | 0.9                | 0.9  | 0.8  | 0.8  | 0.8  | 0.9  | 0.9  | 1.0  | 1.0  | 1.0  | 0.9  | 0.9  | 1.0       | 0.02                                   | 0.01         | 51.5*                    | NA               | 1.3*               | 1.3 (0.7 to 2.0) <sup>NIP</sup> | 376           |
| Pulmonary heart disease (I26-I28)                                       | 2.5                                                        | 2.6           | 2.6           | 2.6       | 2.6              | 2.4                | 2.4  | 2.2  | 2.1  | 2.2  | 2.2  | 2.2  | 2.2  | 2.2  | 2.4  | 2.3  | 2.5  | 2.5       | 0.01                                   | 0.06         | 3.6                      | 19.7*            | 0.0                | 1.7 (0.8 to 2.5)^               | 93            |
| <b>Diseases of the digestive system (K00-K92)</b>                       |                                                            |               |               |           |                  |                    |      |      |      |      |      |      |      |      |      |      |      |           |                                        |              |                          |                  |                    |                                 |               |
| Alcoholic liver disease (K70)                                           | 5.8                                                        | 5.9           | 5.9           | 5.8       | 5.9              | 6.0                | 6.0  | 6.1  | 6.8  | 6.9  | 7.0  | 7.3  | 7.6  | 7.9  | 8.2  | 8.5  | 9.2  | 9.4       | 0.21                                   | 0.37         | 62.4*                    | 63.0*            | 2.9*               | 4.1 (3.7 to 4.5)^               | 3,901         |
| <b>Mental and behavioral disorders (F01-F99)</b>                        |                                                            |               |               |           |                  |                    |      |      |      |      |      |      |      |      |      |      |      |           |                                        |              |                          |                  |                    |                                 |               |
| Mental/behavioral disorders involving psychoactive substances (F10-F19) | 4.0                                                        | 4.1           | 4.3           | 4.6       | 4.9              | 5.2                | 5.3  | 5.5  | 4.0  | 3.9  | 3.8  | 4.1  | 4.3  | 4.5  | 4.7  | 5.1  | 5.6  | 6.3       | 0.14                                   | 0.40         | 58.9*                    | 66.7*            | 2.6*               | 7.4 (5.3 to 9.5)^               | 2,493         |
| Organic mental disorders (F01-F09)                                      | 0.2                                                        | 0.2           | 0.3           | 0.3       | 0.3              | 0.3                | 0.4  | 0.6  | 0.6  | 0.7  | 0.7  | 0.7  | 0.8  | 0.8  | 0.8  | 0.7  | 0.7  | 0.6       | 0.02                                   | -0.03        | 185.9*                   | NA               | 6.1*               | -8.9 (-17.3 to 0.4)^            | 442           |
| <b>Infectious and parasitic diseases (A00-B99)</b>                      |                                                            |               |               |           |                  |                    |      |      |      |      |      |      |      |      |      |      |      |           |                                        |              |                          |                  |                    |                                 |               |
| Misc. infectious diseases (A00-A99) <sup>5</sup>                        | 3.7                                                        | 3.8           | 3.9           | 4.2       | 4.3              | 4.4                | 4.4  | 4.3  | 4.6  | 4.8  | 4.9  | 4.7  | 5.0  | 5.0  | 5.3  | 5.5  | 5.6  | 5.7       | 0.12                                   | 0.14         | 53.9*                    | NA               | 2.4*               | 2.4 (2.2 to 2.7) <sup>NIP</sup> | 2,149         |
| <b>Neoplasms (C00-D48)</b>                                              |                                                            |               |               |           |                  |                    |      |      |      |      |      |      |      |      |      |      |      |           |                                        |              |                          |                  |                    |                                 |               |
| Liver cancer (C22)                                                      | 2.2                                                        | 2.4           | 2.4           | 2.6       | 2.7              | 2.8                | 3.0  | 3.0  | 3.2  | 3.4  | 3.6  | 3.7  | 4.0  | 4.1  | 4.1  | 4.1  | 4.2  | 4.0       | 0.11                                   | 0.01         | 80.0*                    | NA               | 3.7*               | 0.0 (-1.3 to 1.3)^              | 1,931         |
| Cancer of lip/oral cavity/pharynx (C00-C14)                             | 1.9                                                        | 1.9           | 1.9           | 1.9       | 1.9              | 1.8                | 1.9  | 1.8  | 1.9  | 1.8  | 1.7  | 1.9  | 1.9  | 2.0  | 1.9  | 2.0  | 1.9  | 2.1       | 0.01                                   | 0.04         | 10.5*                    | 23.5*            | 0.4                | 1.8 (0.6 to 3.0)^               | 215           |
| Pancreatic cancer (C25)                                                 | 5.3                                                        | 5.3           | 5.3           | 5.2       | 5.1              | 5.3                | 5.4  | 5.4  | 5.4  | 5.4  | 5.5  | 5.6  | 5.4  | 5.5  | 5.4  | 5.6  | 5.5  | 5.5       | 0.01                                   | 0.03         | 3.3                      | 7.6*             | 0.3*               | 0.3 (0.2 to 0.5) <sup>NIP</sup> | 188           |

| Endocrine, nutritional, and metabolic diseases (E00-E88)              |      |      |      |      |      |      |      |      |      |      |      |      |      |      |      |      |      |      |      |       |        |        |                               |                                  |       |
|-----------------------------------------------------------------------|------|------|------|------|------|------|------|------|------|------|------|------|------|------|------|------|------|------|------|-------|--------|--------|-------------------------------|----------------------------------|-------|
| Obesity (E65-E68)                                                     | 1.2  | 1.4  | 1.5  | 1.7  | 1.8  | 1.8  | 2.0  | 2.0  | 2.0  | 2.0  | 2.2  | 2.2  | 2.3  | 2.4  | 2.4  | 2.5  | 2.7  | 2.7  | 0.09 | 0.08  | 124.6* | NA     | 4.9*                          | 3.3 (2.9 to 3.7) <sup>^</sup>    | 1,616 |
| Diabetes (E10-E14)                                                    | 9.3  | 9.5  | 9.7  | 9.8  | 9.9  | 9.7  | 9.6  | 9.3  | 9.2  | 9.1  | 8.9  | 9.6  | 9.2  | 9.5  | 9.8  | 10.2 | 10.1 | 0.05 | 0.11 | 8.9*  | 14.2*  | 0.5*   | 2.2 (1.4 to 3.0) <sup>^</sup> | 879                              |       |
| Metabolic disorders (E70-E88)                                         | 1.7  | 1.8  | 1.9  | 2.0  | 2.0  | 2.0  | 2.1  | 2.1  | 2.1  | 2.2  | 2.2  | 2.2  | 2.3  | 2.3  | 2.4  | 2.5  | 2.6  | 2.5  | 0.05 | 0.05  | 46.2*  | NA     | 2.0*                          | 2.0 (1.8 to 2.3) <sup>NJP</sup>  | 858   |
| Misc. endocrine disorders (E00-E07, 15-16, 20-34, 40-46) <sup>6</sup> | 0.5  | 0.5  | 0.5  | 0.4  | 0.5  | 0.5  | 0.5  | 0.4  | 0.5  | 0.5  | 0.5  | 0.5  | 0.5  | 0.5  | 0.6  | 0.6  | 0.6  | 0.6  | 0.01 | 0.01  | 31.1*  | 38.9*  | 1.7*                          | 1.7 (1.2 to 2.2) <sup>NJP</sup>  | 154   |
| Diseases of the respiratory system (J00-J98)                          |      |      |      |      |      |      |      |      |      |      |      |      |      |      |      |      |      |      |      |       |        |        |                               |                                  |       |
| Chronic lower respiratory diseases (J40-J47)                          | 11.5 | 11.0 | 11.2 | 10.9 | 11.1 | 10.5 | 11.1 | 10.6 | 10.7 | 11.4 | 11.4 | 11.1 | 11.5 | 11.5 | 11.8 | 12.0 | 12.2 | 12.3 | 0.04 | 0.17  | 6.6*   | 17.1*  | 0.5*                          | 1.4 (0.9 to 1.9) <sup>^</sup>    | 835   |
| Lung diseases due to external agents (J60-J70)                        | 0.8  | 0.9  | 0.9  | 0.9  | 1.0  | 0.9  | 1.0  | 1.0  | 0.9  | 1.0  | 1.0  | 1.0  | 1.1  | 1.1  | 1.2  | 1.2  | 1.3  | 1.3  | 0.03 | 0.04  | 60.3*  | NA     | 2.4*                          | 2.4 (2.0 to 2.8) <sup>NJP</sup>  | 542   |
| Misc. respiratory system disorders (J96-J98) <sup>7</sup>             | 0.8  | 0.7  | 0.7  | 0.7  | 0.7  | 0.7  | 0.8  | 0.8  | 0.8  | 0.9  | 0.8  | 0.9  | 1.0  | 1.1  | 1.1  | 1.2  | 1.3  | 2.4  | 0.09 | 0.27  | 206.5* | 252.1* | 6.3*                          | 37.4 (20.1 to 57.1) <sup>^</sup> | 1,709 |
| Diseases of the nervous system (G00-G98)                              |      |      |      |      |      |      |      |      |      |      |      |      |      |      |      |      |      |      |      |       |        |        |                               |                                  |       |
| Alzheimer's/degenerative disorders (G30-G31)                          | 0.6  | 0.6  | 0.7  | 0.6  | 0.7  | 0.6  | 0.7  | 0.7  | 0.7  | 0.8  | 0.7  | 0.7  | 0.8  | 0.8  | 0.9  | 0.9  | 0.9  | 1.1  | 0.03 | 0.06  | 76.8*  | 84.5*  | 2.8*                          | 2.8 (2.1 to 3.4) <sup>NJP</sup>  | 498   |
| Epilepsy/episodic, paroxysmal disorders (G40-G47)                     | 0.6  | 0.6  | 0.7  | 0.7  | 0.7  | 0.7  | 0.8  | 0.8  | 0.8  | 0.7  | 0.9  | 0.8  | 0.8  | 0.8  | 0.9  | 0.9  | 0.9  | 1.0  | 0.02 | 0.04  | 60.6*  | NA     | 2.4*                          | 2.4 (2.0 to 2.9) <sup>NJP</sup>  | 401   |
| Inflammatory diseases (G00-G14) <sup>8</sup>                          | 1.9  | 2.1  | 2.0  | 2.1  | 2.2  | 2.1  | 2.2  | 2.2  | 2.2  | 2.2  | 2.2  | 2.3  | 2.3  | 2.3  | 2.3  | 2.4  | 2.3  | 2.3  | 0.02 | -0.01 | 17.1*  | NA     | 0.8*                          | 0.8 (0.5 to 1.1) <sup>NJP</sup>  | 353   |
| Cerebral palsy (G80-G83)                                              | 0.5  | 0.5  | 0.6  | 0.6  | 0.6  | 0.7  | 0.7  | 0.7  | 0.7  | 0.7  | 0.8  | 0.8  | 0.8  | 0.8  | 0.9  | 0.8  | 0.9  | 0.9  | 0.02 | 0.02  | 59.1*  | 15.3*  | 3.2*                          | 2.1 (1.2 to 3.1) <sup>^</sup>    | 346   |
| Extrapyramidal/movement disorders (G20-G25)                           | 0.3  | 0.3  | 0.3  | 0.3  | 0.3  | 0.3  | 0.3  | 0.3  | 0.3  | 0.3  | 0.3  | 0.4  | 0.3  | 0.4  | 0.4  | 0.4  | 0.4  | 0.4  | 0.01 | 0.03  | 65.6*  | NA     | 2.0*                          | 2.0 (1.3 to 2.7) <sup>NJP</sup>  | 189   |
| Misc. peripheral diseases (G50-G72) <sup>9</sup>                      | 0.6  | 0.6  | 0.5  | 0.7  | 0.6  | 0.6  | 0.7  | 0.6  | 0.7  | 0.6  | 0.7  | 0.6  | 0.7  | 0.7  | 0.7  | 0.6  | 0.6  | 0.7  | 0.01 | 0.01  | 29.9*  | 34.0*  | 1.0*                          | 1.0 (0.4 to 1.6) <sup>NJP</sup>  | 177   |
| Misc. disorders (G90-G98) <sup>10</sup>                               | 1.3  | 1.3  | 1.3  | 1.4  | 1.4  | 1.4  | 1.4  | 1.6  | 1.7  | 1.8  | 1.9  | 1.9  | 1.9  | 2.0  | 2.1  | 2.2  | 2.3  | 2.3  | 0.06 | 0.08  | 78.5*  | NA     | 3.5*                          | 3.3 (2.5 to 4.1)                 | 1,084 |
| Diseases of the genitourinary system (N00-N98)                        |      |      |      |      |      |      |      |      |      |      |      |      |      |      |      |      |      |      |      |       |        |        |                               |                                  |       |
| Renal failure (N17-N19)                                               | 2.4  | 2.7  | 2.8  | 2.8  | 2.9  | 3.0  | 2.9  | 3.0  | 2.9  | 3.0  | 3.0  | 3.0  | 2.9  | 2.8  | 2.9  | 2.9  | 3.1  | 3.2  | 0.05 | 0.08  | 33.7*  | 13.5*  | 1.6*                          | 5.3 (-2.9 to 14.2)               | 865   |
| Other urinary system diseases (N00-N15, N20-39) <sup>11</sup>         | 0.8  | 0.8  | 0.8  | 0.8  | 0.9  | 0.9  | 1.0  | 1.0  | 1.1  | 1.0  | 1.0  | 1.1  | 0.9  | 0.9  | 1.0  | 1.0  | 1.2  | 1.2  | 0.02 | 0.06  | 43.3*  | 31.6*  | 1.8*                          | 1.8 (1.2 to 2.4) <sup>NJP</sup>  | 385   |

†Average year-to-year changes (from 1999 to 2016) in absolute mortality rates (deaths per 100,000). See text for more details.

‡Slopes from fitted model, in which joinpoint analysis<sup>30</sup> was used to plot trend lines that best fit the 17 annual mortality rates (see Methods). *Joinpoints* (grey boxes) are points of inflection when mortality trend lines changed significantly. *APC* = annual percentage rate change, the slope for the interval(s) between joinpoints. *AAPC* = average annual percent change, the slope for the entire (1999-2016) period based on the weighted average of the APCs. For brevity, the table presents APC values only for the final interval ending in 2016 (or the entire 1999-2016 period when there are no joinpoints). Table S8 of this supplement provides all AAPC values, APC values for every segment, and related 95% confidence intervals and p values. The Joinpoint Chartbook in this supplement displays the fitted model for each cause of death and racial-ethnic group.

\* Statistically significant changes in mortality rates (p < 0.05)

<sup>^</sup>APC (slope) for interval ending in 2016 differed significantly (p < 0.05) from slope of preceding period. *NJP* = no joinpoint (i.e., the fitted slope had no significant inflection between 1999 and 2016). Values equal the AAPC for the entire 1999-2016 period.

NA = Not applicable; data were inadequate for calculation

1. Accidents involving other land, water transport, air/space, and other/unspecified transport
2. Accidental poisoning by organic solvents, halogenated hydrocarbons, other gases and vapors, pesticides, and unspecified chemicals and noxious substances
3. Also includes deaths from submersion, smoke, and flames
4. Arrhythmias, cardiomyopathy, heart failure, cardiac arrest, myocarditis, and valvular and pericardial disease.
5. Intestinal infections, tuberculosis, and zoonotic and other bacterial, sexually transmitted, spirochetal, chlamydial, rickettsial, central nervous system, arthropod-borne, and viral hemorrhagic infections
6. Disorders of thyroid and other endocrine glands, malnutrition, and disorders of glucose regulation and pancreatic internal secretion
7. Respiratory failure, not elsewhere classified, and other respiratory disorders
8. Inflammatory diseases (e.g., meningitis, encephalitis) and systemic atrophies (e.g., Huntington's disease) affecting the central nervous system
9. Nerve/nerve root/plexus disorders, polyneuropathies and other disorders of the peripheral nervous system, diseases of myoneural junction and muscle
10. Disorders of autonomic nervous system, hydrocephalus, toxic encephalopathy, and other disorders of nervous system, not elsewhere classified
11. Glomerular and renotubular interstitial diseases, urolithiasis, and other diseases of urinary system

Notes: Grey cells with bolded borders denote joinpoints, which demarcate changes in the APC (slope). Green shading denotes decreasing mortality (negative APC values that differ significantly from zero [p < 0.05]). Red shading denotes increasing mortality (positive APC values that differ significantly from zero [p < 0.05]). No shading indicates statistically stable trends (APC values that did not differ significantly from zero). Rows with no color and diagonal hashmarks had inadequate data, due to unreported mortality rates for certain years, to perform joinpoint analysis. Nadirs (mortality rates significantly below 2016 rates) are underlined and bolded. See text for methods for

calculating average year-to-year increases and excess deaths. Increases in midlife mortality from homicide (X85-Y09) and viral hepatitis (B15-B19) were statistically significant on two-point comparisons but were not confirmed on joinpoint analysis and are not presented here. For brevity, data are not shown here for deaths aggregated by broad categories (e.g., circulatory system disorders), those making relatively small contributions to increasing mortality (average year-to-year increase  $\leq 0.01/100,000$  during 1999-2016), and increases that lacked statistical significance on two-point comparisons (with support from joinpoint analysis). Some excluded conditions that did not yield statistically significant increases in mortality in 1999-2016 (or increases  $> 0.01/100,000$ ) did produce statistically significant post-nadir increases. Additional data are available in Tables S2-S4 of the online supplement.

TABLE S3. MORTALITY RATES BY LEADING CAUSES AMONG NON-HISPANIC AMERICAN INDIANS AND ALASKAN NATIVES, BLACKS, HISPANICS, AND ASIANS AND PACIFIC ISLANDERS, AGES 25-64 YEARS, 1999-2016

| Causes of death (ICD-10 codes)                                          | Age-adjusted mortality rates (deaths per 100,000), by year |      |      |      |      |      |      |      |      |      |      |      |      |      |      |      |      |      | Average absolute year-to-year changes (per 100,000) <sup>†</sup> |           | Proportional (%) changes |                   |                           |                                  | Excess deaths (1999-2016) |
|-------------------------------------------------------------------------|------------------------------------------------------------|------|------|------|------|------|------|------|------|------|------|------|------|------|------|------|------|------|------------------------------------------------------------------|-----------|--------------------------|-------------------|---------------------------|----------------------------------|---------------------------|
|                                                                         | 1999                                                       | 2000 | 2001 | 2002 | 2003 | 2004 | 2005 | 2006 | 2007 | 2008 | 2009 | 2010 | 2011 | 2012 | 2013 | 2014 | 2015 | 2016 | 1999-2016                                                        | 2012-2016 | 2016 vs 1999             | 2016 vs nadir     | Fitted model <sup>‡</sup> |                                  |                           |
|                                                                         |                                                            |      |      |      |      |      |      |      |      |      |      |      |      |      |      |      |      |      |                                                                  |           |                          |                   | AAPC (1999-2016)          | Final APC (95% CI)               |                           |
| <b>NON-HISPANIC AMERICAN INDIANS AND ALASKAN NATIVES</b>                |                                                            |      |      |      |      |      |      |      |      |      |      |      |      |      |      |      |      |      |                                                                  |           |                          |                   |                           |                                  |                           |
| Drug overdoses (X40-X44)                                                | 7.0                                                        | 6.7  | 8.1  | 10.6 | 13.6 | 15.5 | 17.1 | 17.8 | 18.0 | 20.5 | 24.9 | 23.4 | 24.8 | 28.0 | 27.0 | 31.0 | 32.7 | 35.9 | 1.70                                                             | 2.22      | 411.4*                   | NA                | 10.9*                     | 7.1 (5.7 to 8.5) <sup>^</sup>    | 370                       |
| Alcoholic liver disease (K70)                                           | 29.3                                                       | 27.3 | 27.6 | 28.7 | 29.8 | 27.6 | 29.3 | 28.9 | 33.6 | 34.9 | 32.5 | 39.3 | 38.8 | 41.4 | 44.7 | 44.5 | 50.3 | 48.6 | 1.14                                                             | 1.96      | 65.9*                    | 78.0*             | 3.5*                      | 5.3 (4.3 to 6.3) <sup>^</sup>    | 254                       |
| Suicide (X60-X84)                                                       | 14.9                                                       | 15.5 | 17.2 | 16.8 | 16.6 | 20.4 | 18.6 | 18.6 | 18.6 | 18.5 | 19.3 | 20.6 | 21.4 | 21.7 | 23.6 | 24.0 | 25.8 | 28.4 | 0.80                                                             | 1.40      | 91.2*                    | NA                | 3.5*                      | 6.6 (1.4 to 12.1)                | 176                       |
| Hypertensive diseases (I10-I15)                                         | 3.9                                                        | 4.3  | 4.1  | 4.1  | 7.3  | 7.7  | 7.2  | 8.1  | 7.7  | 8.0  | 9.5  | 10.1 | 9.3  | 9.5  | 12.4 | 13.5 | 13.8 | 14.3 | 0.61                                                             | 1.01      | 269.3*                   | NA                | 7.8*                      | 7.8 (6.4 to 9.3) <sup>NIP</sup>  | 134                       |
| Other heart disease (I30-I51) <sup>1</sup>                              | 15.7                                                       | 15.7 | 16.3 | 14.9 | 18.2 | 16.0 | 17.2 | 17.4 | 17.5 | 17.4 | 17.1 | 17.4 | 16.1 | 16.2 | 17.6 | 15.7 | 20.5 | 20.1 | 0.26                                                             | 0.79      | 27.7                     | 34.9*             | 0.9*                      | 0.9 (0.2 to 1.6) <sup>NIP</sup>  | 57                        |
| Colorectal cancer (C17-21)                                              | 6.7                                                        | 7.2  | 7.1  | 9.8  | 7.0  | 7.6  | 8.6  | 7.5  | 8.4  | 9.6  | 9.7  | 9.1  | 9.6  | 8.3  | 10.1 | 9.3  | 9.1  | 10.8 | 0.24                                                             | 0.24      | 60.6*                    | NA                | 2.0*                      | 2.0 (1.1 to 3.0) <sup>NIP</sup>  | 52                        |
| Liver cancer (C22)                                                      | 3.2                                                        | 4.6  | 4.1  | 3.5  | 4.9  | 5.5  | 4.2  | 4.3  | 5.7  | 5.4  | 5.5  | 5.4  | 5.7  | 6.4  | 7.6  | 5.7  | 7.4  | 6.8  | 0.21                                                             | 0.22      | 115.1*                   | NA                | 4.0*                      | 4.0 (2.7 to 5.2) <sup>NIP</sup>  | 45                        |
| Falls, drowning, fire (W00-W19, W65-W74, X00-X09) <sup>2</sup>          | 8.3                                                        | 9.2  | 8.2  | 9.8  | 9.0  | 8.8  | 9.6  | 8.0  | 8.1  | 7.8  | 8.4  | 8.9  | 8.6  | 11.0 | 10.6 | 10.7 | 9.8  | 11.6 | 0.19                                                             | 0.59      | 39.3                     | 49.0*             | 1.3                       | 4.1 (1.3 to 6.9) <sup>^</sup>    | 43                        |
| Viral hepatitis (B15-B19)                                               | 2.3                                                        | 4.5  | 3.4  | 4.0  | 4.5  | 4.2  | 3.6  | 6.1  | 6.5  | 5.8  | 6.6  | 5.5  | 5.5  | 6.1  | 6.9  | 6.0  | 5.2  | 4.8  | 0.15                                                             | -0.12     | 112.1*                   | NA                | 3.7*                      | 3.7 (1.5 to 5.9) <sup>NIP</sup>  | 29                        |
| Diabetes (E10-E14)                                                      | 28.6                                                       | 23.1 | 23.1 | 26.6 | 27.9 | 25.8 | 25.8 | 26.1 | 22.6 | 22.4 | 22.5 | 25.3 | 27.6 | 26.7 | 26.8 | 27.8 | 29.1 | 30.9 | 0.13                                                             | 0.66      | 7.9                      | 37.7*             | 0.9                       | 3.7 (0.7 to 6.7) <sup>^</sup>    | 38                        |
| Homicide (X85-Y09)                                                      | 13.5                                                       | 10.3 | 9.3  | 12.0 | 10.0 | 9.9  | 11.0 | 11.6 | 10.1 | 11.8 | 11.1 | 12.0 | 11.7 | 11.9 | 11.9 | 12.2 | 13.4 | 14.5 | 0.06                                                             | 0.56      | 7.6*                     | 55.3*             | 1.2*                      | 1.2 (0.3 to 2.2) <sup>NIP</sup>  | 19                        |
| Mental/behavioral disorders involving psychoactive substances (F10-F19) | 17.3                                                       | 14.0 | 16.0 | 13.8 | 17.9 | 17.8 | 16.7 | 18.1 | 12.2 | 13.4 | 11.7 | 10.7 | 12.3 | 14.0 | 13.0 | 17.2 | 16.9 | 17.3 | 0.00                                                             | 1.02      | 0.2                      | 61.8*             | 1.1                       | 9.0 (2.6 to 15.8) <sup>^</sup>   | 6                         |
| Misc. nervous system disorders (G90-G98) <sup>3</sup>                   | UR                                                         | UR   | 2.5  | UR   | 1.7  | 2.2  | 2.7  | 2.1  | 2.5  | 2.8  | 2.4  | 2.9  | 3.2  | 3.1  | 2.6  | 2.7  | 2.8  | 3.5  | NA                                                               | 0.05      | NA                       | 108.9*            | Insufficient data         |                                  | 24                        |
| Alcohol poisoning (X45)                                                 | 2.2                                                        | UR   | UR   | UR   | UR   | UR   | UR   | 2.1  | 4.6  | 7.6  | 8.2  | 9.3  | 9.1  | 9.8  | 9.7  | 9.8  | 10.2 | NA   | 0.21                                                             | 366.6*    | NA                       | Insufficient data |                           | 104                              |                           |
| <b>NON-HISPANIC BLACKS</b>                                              |                                                            |      |      |      |      |      |      |      |      |      |      |      |      |      |      |      |      |      |                                                                  |           |                          |                   |                           |                                  |                           |
| Drug overdoses (X40-X44)                                                | 10.2                                                       | 10.0 | 10.4 | 11.4 | 11.4 | 11.8 | 13.8 | 16.3 | 14.1 | 12.1 | 11.9 | 11.6 | 12.9 | 12.9 | 14.5 | 15.5 | 18.1 | 25.5 | 0.90                                                             | 2.51      | 149.6*                   | 119.1*            | 5.8*                      | 28.7 (11.4 to 48.7) <sup>^</sup> | 3,187                     |
| Homicide (X85-Y09)]                                                     | 22.8                                                       | 23.6 | 23.7 | 25.1 | 25.1 | 24.5 | 25.6 | 26.2 | 25.5 | 23.4 | 22.2 | 21.8 | 21.9 | 23.2 | 22.9 | 21.7 | 25.5 | 27.6 | 0.29                                                             | 1.15      | 21.4*                    | 27.2*             | 1.1                       | 11.3 (3.8 to 19.3) <sup>^</sup>  | 1,005                     |
| Hypertensive diseases (I10-I15)                                         | 24.7                                                       | 25.1 | 25.4 | 26.7 | 28.4 | 28.0 | 26.8 | 26.9 | 26.6 | 27.4 | 28.0 | 26.9 | 26.5 | 27.3 | 27.4 | 27.7 | 28.2 | 28.5 | 0.23                                                             | 0.40      | 15.5*                    | NA                | 0.7*                      | 0.1 (-0.2 to 0.5) <sup>^</sup>   | 725                       |
| Obesity (E65-E68)                                                       | 2.3                                                        | 2.8  | 3.0  | 3.3  | 3.1  | 3.6  | 3.8  | 3.6  | 3.7  | 3.7  | 3.6  | 3.7  | 4.1  | 3.8  | 3.9  | 4.7  | 4.9  | 5.1  | 0.16                                                             | 0.20      | 120.7*                   | NA                | 4.8*                      | 9.6 (1.4 to 18.4)                | 545                       |
| Liver cancer (C22)                                                      | 4.8                                                        | 5.4  | 5.4  | 5.4  | 5.9  | 5.9  | 6.5  | 6.6  | 6.5  | 7.0  | 7.5  | 7.7  | 7.7  | 7.6  | 7.7  | 7.6  | 7.2  | 7.2  | 0.14                                                             | -0.10     | 49.5*                    | NA                | 2.2*                      | -1.8 (-3.6 to 0.0) <sup>^</sup>  | 430                       |
| Misc. nervous system disorders (G90-G98) <sup>3</sup>                   | 3.7                                                        | 3.7  | 3.5  | 3.5  | 3.8  | 3.8  | 3.9  | 4.0  | 4.0  | 4.4  | 4.4  | 4.3  | 4.2  | 4.7  | 4.6  | 5.0  | 5.0  | 5.1  | 0.08                                                             | 0.17      | 35.8*                    | NA                | 2.2*                      | 2.2 (1.8 to 2.5) <sup>NIP</sup>  | 268                       |
| Pedestrian/cyclist/motorcycle injury (V01-V29)                          | 5.4                                                        | 5.5  | 5.5  | 5.4  | 5.6  | 5.8  | 6.0  | 6.0  | 6.1  | 5.7  | 5.1  | 4.9  | 5.1  | 5.5  | 5.7  | 5.5  | 6.4  | 6.6  | 0.08                                                             | 0.31      | 23.7*                    | 36.5*             | 1.2                       | 5.1 (3.4 to 6.8) <sup>^</sup>    | 265                       |
| Misc. land/other transport accidents (V80-V99)                          | 6.4                                                        | 6.7  | 6.1  | 5.3  | 5.8  | 5.7  | 5.5  | 6.2  | 5.7  | 5.4  | 5.8  | 5.7  | 5.2  | 5.8  | 6.3  | 6.4  | 6.9  | 7.5  | 0.07                                                             | 0.45      | 17.7*                    | 42.8*             | 1.1                       | 6.5 (2.6 to 10.5) <sup>^</sup>   | 264                       |
| Metabolic disorders (E70-E88)                                           | 2.4                                                        | 2.5  | 2.4  | 2.7  | 2.6  | 2.5  | 2.6  | 2.5  | 2.7  | 2.6  | 2.7  | 2.6  | 2.8  | 2.8  | 2.9  | 3.2  | 3.4  | 3.5  | 0.06                                                             | 0.13      | 43.2*                    | 47.2*             | 2.0*                      | 4.6 (2.8 to 6.5) <sup>^</sup>    | 216                       |

|                                                                         |      |      |            |            |            |            |            |            |             |            |            |            |             |             |            |      |      |      |       |       |         |        |                   |                                 |       |  |
|-------------------------------------------------------------------------|------|------|------------|------------|------------|------------|------------|------------|-------------|------------|------------|------------|-------------|-------------|------------|------|------|------|-------|-------|---------|--------|-------------------|---------------------------------|-------|--|
| Misc. respiratory system disorders (J96-J98) <sup>4</sup>               | 1.3  | 1.4  | 1.5        | 1.3        | 1.3        | <u>1.3</u> | 1.4        | 1.4        | 1.5         | 1.7        | 1.4        | 1.7        | 1.5         | 1.6         | 2.1        | 1.9  | 2.1  | 2.4  | 0.06  | 0.18  | 75.8*   | 87.3*  | 3.5*              | 8.7 (2.8 to 14.9) <sup>^</sup>  | 212   |  |
| Suicide (X60-X84)                                                       | 7.2  | 7.1  | 7.2        | 7.3        | 7.1        | 7.2        | 7.1        | 7.0        | <u>7.0</u>  | <u>7.0</u> | 7.1        | 7.4        | 7.5         | 7.8         | 7.6        | 7.5  | 7.6  | 8.2  | 0.06  | 0.14  | 13.7*   | 17.7*  | 0.6*              | 1.5 (0.9 to 2.0) <sup>^</sup>   | 213   |  |
| Organic mental disorders (F01-F09)                                      | 0.3  | 0.5  | 0.4        | 0.4        | 0.5        | 0.4        | 0.5        | 0.9        | 0.9         | 0.9        | 0.7        | 1.0        | 1.0         | 1.1         | 1.3        | 1.1  | 1.0  | 0.9  | 0.04  | -0.02 | 215.3*  | NA     | 6.2*              | -10.5 (-31.5 to 17.1)           | 119   |  |
| Cerebral palsy (G80-G83)                                                | 0.6  | 0.7  | <u>0.9</u> | 1.0        | 0.9        | 0.9        | 1.1        | 1.0        | 1.0         | 1.1        | 1.0        | 1.1        | 1.0         | 0.9         | 1.0        | 1.0  | 1.2  | 1.2  | 0.03  | 0.03  | 93.4*   | NA     | 3.5*              | 1.3 (0.4 to 2.1)                | 109   |  |
| Alzheimer's/degenerative disorders (G30-G31)                            | 0.4  | 0.5  | 0.4        | 0.5        | 0.4        | <u>0.4</u> | 0.5        | 0.6        | 0.4         | 0.5        | 0.5        | 0.4        | 0.5         | 0.5         | 0.6        | 0.7  | 0.7  | 0.6  | 0.01  | 0.01  | 54.1    | 64.9*  | 2.5*              | 2.5 (1.2 to 3.8) <sup>NIP</sup> | 42    |  |
| Lung diseases due to external agents (J60-J70)                          | 1.6  | 1.5  | 1.4        | 1.4        | 1.6        | 1.5        | 1.5        | 1.3        | 1.4         | 1.4        | 1.4        | <u>1.2</u> | 1.4         | 1.4         | 1.5        | 1.5  | 1.5  | 1.6  | -0.00 | 0.05  | -1.1    | 30.1*  | 0.1               | 3.1 (0.8 to 5.4) <sup>^</sup>   | 4     |  |
| Pancreatic cancer (C25)                                                 | 8.1  | 7.6  | <u>7.3</u> | 7.6        | 7.9        | <u>7.7</u> | 7.6        | 7.6        | 7.6         | 7.6        | 7.4        | 7.2        | <u>7.1</u>  | 7.5         | 7.3        | 7.4  | 7.6  | 7.8  | -0.01 | 0.15  | -3.1    | 10.6*  | -0.2              | 1.6 (0.3 to 2.9) <sup>^</sup>   | (29)  |  |
| Misc. infectious diseases (A00-A99) <sup>5</sup>                        | 12.2 | 12.5 | 12.5       | 12.5       | 12.7       | 12.3       | 12.0       | 12.3       | 11.9        | 12.0       | 11.7       | 11.0       | <u>10.9</u> | <u>10.5</u> | 11.0       | 10.6 | 11.2 | 11.5 | -0.04 | 0.12  | -5.8    | 8.9*   | -0.6              | 2.1 (0.0 to 4.3) <sup>^</sup>   | (134) |  |
| Pulmonary heart disease (I26-I28)                                       | 6.3  | 5.9  | 6.0        | 5.9        | 6.0        | 5.5        | 5.6        | 5.2        | 4.7         | <u>4.7</u> | 5.3        | 5.1        | 5.1         | 5.3         | 5.1        | 5.2  | 5.5  | 5.5  | -0.05 | 0.09  | -12.3   | 17.9*  | -0.8*             | 1.5 (0.2 to 2.7) <sup>^</sup>   | (126) |  |
| Chronic lower respiratory diseases (J40-J47)                            | 13.7 | 13.4 | 12.4       | 12.4       | 12.0       | 11.5       | 11.9       | 11.1       | <u>10.6</u> | 11.3       | 11.0       | 10.8       | 10.8        | 11.0        | 11.5       | 11.3 | 11.3 | 11.7 | -0.12 | 0.17  | -14.66* | 9.5*   | -1.0*             | 0.7 (0.0 to 1.3) <sup>^</sup>   | (339) |  |
| Alcoholic liver disease (K70)                                           | 7.7  | 7.2  | 6.8        | 5.8        | 5.8        | 5.4        | 5.1        | <u>4.3</u> | 4.9         | 4.8        | 4.5        | 4.7        | 5.0         | 4.6         | 4.9        | 5.0  | 5.3  | 5.2  | -0.14 | 0.04  | -31.59* | 20.4*  | -2.3*             | 1.2 (0.3 to 2.1) <sup>^</sup>   | (418) |  |
| Car accidents (V40-V49)                                                 | 6.2  | 6.1  | 6.0        | 6.3        | 5.9        | 5.8        | 5.3        | 5.7        | 5.0         | 4.2        | 3.6        | 3.1        | 3.3         | 3.1         | <u>2.5</u> | 2.6  | 2.8  | 3.2  | -0.18 | -0.03 | -48.52* | 25.5*  | -4.2*             | 6.9 (-4.0 to 19.0) <sup>^</sup> | (574) |  |
| Mental/behavioral disorders involving psychoactive substances (F10-F19) | 9.0  | 8.5  | 8.7        | 8.3        | 8.0        | 7.5        | 7.5        | 7.8        | 5.4         | 4.6        | 4.6        | 4.4        | 4.2         | <u>4.0</u>  | 4.3        | 4.4  | 4.3  | 4.9  | -0.24 | 0.13  | -45.13* | 23.3*  | -3.9*             | 1.4 (-0.3 to 3.2) <sup>^</sup>  | (749) |  |
| Diabetes (E10-E14)                                                      | 27.1 | 25.6 | 26.1       | 26.3       | 26.5       | 24.7       | 24.7       | 24.5       | 23.4        | 21.2       | 21.2       | 21.1       | 21.9        | <u>21.0</u> | 21.7       | 21.6 | 22.3 | 22.4 | -0.28 | 0.10  | -17.29* | 7.0*   | -1.1              | 1.0 (0.0 to 2.0)                | (852) |  |
| Other heart disease (I30-I51)                                           | 37.7 | 35.6 | 35.8       | 35.4       | 35.0       | 33.7       | 33.8       | 32.6       | 32.4        | 31.7       | 30.9       | 30.1       | <u>28.3</u> | 29.0        | 30.2       | 30.3 | 31.2 | 32.2 | -0.32 | 0.78  | -14.53* | 13.8*  | -0.9*             | 2.3 (1.5 to 3.2) <sup>^</sup>   | (948) |  |
| <b>HISPANICS</b>                                                        |      |      |            |            |            |            |            |            |             |            |            |            |             |             |            |      |      |      |       |       |         |        |                   |                                 |       |  |
| Drug overdoses (X40-X44)                                                | 7.9  | 6.6  | 6.2        | 7.4        | 7.8        | 7.1        | 8.0        | 9.1        | 8.4         | 8.2        | 8.2        | <u>7.8</u> | 8.7         | 9.0         | 9.6        | 9.8  | 11.2 | 14.3 | 0.37  | 1.11  | 80.0*   | 83.3*  | 4.3*              | 22.4 (-4.8 to 57.3)             | 1,777 |  |
| Hypertensive diseases (I10-I15)                                         | 4.7  | 4.9  | 5.2        | <u>5.9</u> | 6.0        | 5.7        | 5.8        | 5.8        | 6.0         | 6.1        | 6.2        | 6.1        | 5.6         | 6.0         | 6.2        | 6.3  | 6.5  | 6.6  | 0.11  | 0.21  | 40.6*   | NA     | 1.9*              | 0.8 (0.3 to 1.3) <sup>^</sup>   | 410   |  |
| Liver cancer (C22)                                                      | 4.0  | 4.2  | 4.4        | 4.5        | 4.9        | 5.0        | <u>5.4</u> | 5.1        | 5.0         | 5.3        | 5.5        | 5.3        | 5.7         | 5.9         | 6.1        | 5.5  | 5.4  | 5.6  | 0.10  | -0.01 | 41.8*   | NA     | 2.2*              | 0.9 (0.1 to 1.8) <sup>^</sup>   | 333   |  |
| Suicide (X60-X84)                                                       | 7.1  | 7.0  | 7.0        | 7.1        | 6.9        | 7.2        | 6.9        | <u>6.7</u> | 7.7         | 7.0        | 7.3        | 7.3        | 7.2         | 7.3         | <u>7.2</u> | 8.0  | 7.7  | 8.6  | 0.09  | 0.29  | 21.9*   | 28.9*  | 1.2*              | 5.3 (-0.3 to 11.2)              | 426   |  |
| Alcohol poisoning (X45)                                                 | 0.3  | 0.2  | 0.2        | 0.3        | <u>0.2</u> | 0.2        | <u>0.3</u> | 0.2        | 0.9         | <u>1.1</u> | 1.1        | 1.2        | 1.2         | 1.1         | 1.2        | 1.2  | 1.3  | 1.2  | 0.06  | 0.00  | 354.0*  | 657.7* | 10.5*             | 0.8 (-4.7 to 6.6) <sup>^</sup>  | 224   |  |
| Obesity (E65-E68)                                                       | 0.8  | 0.8  | 0.9        | 1.0        | 1.1        | 1.0        | 1.0        | 1.3        | 1.2         | 1.3        | 1.3        | 1.3        | 1.3         | 1.3         | 1.4        | 1.5  | 1.4  | 1.6  | 0.05  | 0.07  | 106.6*  | NA     | 3.8*              | 3.8 (3.1 to 4.6) <sup>NIP</sup> | 193   |  |
| Metabolic disorders (E70-E88)                                           | 0.8  | 0.9  | 1.0        | 0.9        | 1.0        | 0.8        | 1.0        | 1.0        | 0.9         | 1.0        | 1.0        | 1.1        | 1.2         | 1.3         | 1.1        | 1.2  | 1.2  | 1.3  | 0.03  | 0.02  | 60.0*   | NA     | 2.2*              | 2.2 (1.5 to 3.0) <sup>NIP</sup> | 110   |  |
| Misc. nervous system disorders (G90-G98)                                | 1.0  | 1.1  | 1.1        | <u>1.0</u> | 1.1        | 1.2        | 1.2        | 1.1        | 1.3         | 1.2        | 1.3        | 1.4        | 1.3         | 1.3         | 1.5        | 1.4  | 1.6  | 1.5  | 0.03  | 0.03  | 42.0*   | 47.6*  | 2.5*              | 2.5 (1.9 to 3.0) <sup>NIP</sup> | 99    |  |
| Pedestrian/cyclist/motorcycle injury (V01-V29)                          | 4.6  | 4.5  | 4.9        | 4.6        | 5.0        | 4.6        | 4.7        | <u>4.9</u> | 4.6         | 4.4        | <u>3.8</u> | 3.9        | 4.0         | 4.3         | 4.3        | 4.1  | 4.4  | 4.9  | 0.02  | 0.20  | 7.5     | 30.7*  | 0.1               | 2.7 (0.8 to 4.6)                | 114   |  |
| Alzheimer's/degenerative disorders (G30-G31)                            | 0.3  | 0.3  | 0.3        | 0.3        | 0.3        | 0.3        | 0.4        | 0.6        | 0.4         | 0.4        | 0.4        | 0.3        | 0.4         | 0.4         | 0.4        | 0.4  | 0.5  | 0.5  | 0.02  | 0.02  | 108.7*  | NA     | 3.2*              | 3.2 (1.7 to 4.7) <sup>NIP</sup> | 62    |  |
| Epilepsy/episodic, paroxysmal disorders (G40-G47)                       | 0.3  | 0.5  | 0.5        | 0.6        | 0.5        | 0.4        | 0.5        | 0.6        | 0.6         | 0.5        | 0.5        | 0.5        | <u>0.4</u>  | 0.6         | 0.5        | 0.6  | 0.7  | 0.6  | 0.02  | 0.04  | 78.4*   | 46.5*  | 1.5*              | 1.5 (0.1 to 2.9) <sup>NIP</sup> | 56    |  |
| Organic mental disorders (F01-F09)                                      | 0.2  | 0.2  | 0.2        | 0.2        | 0.2        | UR         | 0.3        | 0.4        | 0.2         | 0.4        | 0.4        | 0.4        | 0.4         | 0.6         | 0.5        | 0.4  | 0.4  | 0.4  | NA    | 0.01  | 113.9*  | NA     | Insufficient data |                                 | 42    |  |
| Alcoholic liver disease (K70)                                           | 10.4 | 10.7 | 10.3       | 9.6        | 9.4        | <u>8.7</u> | 8.7        | 8.9        | 9.3         | 9.1        | 9.1        | 9.2        | 9.4         | 9.3         | <u>9.1</u> | 9.9  | 10.2 | 10.4 | 0.00  | 0.21  | 0.6     | 20.3*  | -0.2              | 4.0 (0.6 to 7.5)                | 131   |  |
| Misc. respiratory system disorders (J96-J98) <sup>4</sup>               | 0.4  | 0.3  | 0.3        | 0.4        | 0.3        | 0.3        | 0.4        | <u>0.3</u> | 0.4         | 0.4        | 0.3        | 0.4        | 0.4         | 0.4         | 0.5        | 0.5  | 0.7  | 0.5  | 0.01  | 0.03  | 41.8    | 79.0*  | 3.2*              | 3.2 (1.7 to 4.8) <sup>NIP</sup> | 40    |  |
| Misc. peripheral nervous system diseases (G50-G72) <sup>6</sup>         | 0.2  | 0.3  | 0.2        | 0.4        | 0.3        | 0.2        | 0.3        | 0.2        | 0.3         | 0.3        | 0.2        | 0.4        | 0.3         | 0.2         | 0.3        | 0.3  | 0.4  | 0.4  | 0.01  | 0.02  | 83.7*   | NA     | 2.0*              | 2.0 (0.3 to 3.7) <sup>NIP</sup> | 39    |  |

|                                                                         |     |            |            |     |     |     |     |     |     |     |            |            |            |     |            |     |     |     |              |      |        |       |       |                                 |       |  |
|-------------------------------------------------------------------------|-----|------------|------------|-----|-----|-----|-----|-----|-----|-----|------------|------------|------------|-----|------------|-----|-----|-----|--------------|------|--------|-------|-------|---------------------------------|-------|--|
| Misc. land/other transport accidents (V80-V99) <sup>7</sup>             | 5.4 | 5.5        | 5.4        | 4.0 | 4.4 | 4.2 | 4.2 | 4.9 | 5.0 | 4.5 | 3.7        | 3.8        | <b>3.4</b> | 3.9 | 4.3        | 4.4 | 4.8 | 5.1 | <b>-0.02</b> | 0.34 | -5.5   | 49.1* | -0.4  | 8.8 (3.0 to 15.0) <sup>^</sup>  | 32    |  |
| Mental/behavioral disorders involving psychoactive substances (F10-F19) | 5.1 | 4.7        | 4.6        | 4.8 | 4.9 | 4.5 | 5.0 | 4.8 | 3.3 | 2.9 | 2.8        | 2.7        | <b>2.6</b> | 2.6 | 3.0        | 3.0 | 3.0 | 3.3 | <b>-0.11</b> | 0.15 | -35.4* | 28.8* | -2.5  | 3.4 (1.4 to 5.6) <sup>^</sup>   | (355) |  |
| Homicide (X85-Y09)                                                      | 8.4 | 8.4        | 8.1        | 8.1 | 8.3 | 7.8 | 8.2 | 7.9 | 7.5 | 7.2 | 6.7        | 6.0        | 5.6        | 5.7 | <b>5.3</b> | 5.4 | 5.8 | 6.4 | <b>-0.12</b> | 0.16 | -23.5* | 22.0* | -1.6* | 7.0 (2.6 to 11.5) <sup>^</sup>  | (408) |  |
| <b>NON-HISPANIC ASIANS AND PACIFIC ISLANDERS</b>                        |     |            |            |     |     |     |     |     |     |     |            |            |            |     |            |     |     |     |              |      |        |       |       |                                 |       |  |
| Drug overdoses (X40-X44)                                                | 0.9 | 0.9        | <b>0.8</b> | 1.0 | 1.2 | 1.3 | 1.5 | 1.6 | 1.7 | 1.6 | 1.6        | 1.7        | 2.1        | 2.4 | 2.5        | 2.5 | 3.1 | 3.6 | <b>0.16</b>  | 0.30 | 300.6* | NA    | 8.2*  | 11.4 (8.9 to 14.0) <sup>^</sup> | 258   |  |
| Hypertensive diseases (I10-I15)                                         | 3.1 | <b>2.6</b> | 3.3        | 3.1 | 2.9 | 3.4 | 3.4 | 3.3 | 3.0 | 3.2 | 3.0        | 3.2        | 3.0        | 3.0 | 3.3        | 3.8 | 3.7 | 4.0 | <b>0.05</b>  | 0.19 | 28.3*  | 51.9* | 1.2*  | 1.2 (0.3 to 2.0) <sup>NJP</sup> | 93    |  |
| Alcoholic liver disease (K70)                                           | 1.2 | 1.6        | 1.4        | 1.5 | 1.2 | 1.3 | 1.5 | 1.6 | 1.6 | 1.6 | 1.8        | 1.4        | 1.8        | 1.4 | 1.7        | 1.8 | 2.0 | 2.0 | <b>0.04</b>  | 0.04 | 62.9*  | NA    | 2.0*  | 2.0 (1.0 to 3.1) <sup>NJP</sup> | 68    |  |
| Brain/central nervous system cancers (C69-C72)                          | 1.3 | 1.6        | 1.5        | 1.8 | 1.5 | 1.7 | 1.5 | 1.5 | 1.5 | 1.5 | <b>1.4</b> | 1.7        | 1.5        | 1.7 | 1.9        | 1.8 | 1.9 | 2.0 | <b>0.04</b>  | 0.08 | 56.6*  | 36.5* | 1.4*  | 1.4 (0.5 to 2.4) <sup>NJP</sup> | 61    |  |
| Mental/behavioral disorders involving psychoactive substances (F10-F19) | 0.6 | 0.6        | 0.7        | 0.9 | 0.9 | 0.9 | 1.0 | 1.2 | 0.7 | 0.6 | 0.7        | <b>0.5</b> | 0.7        | 0.8 | 0.8        | 0.9 | 0.9 | 0.8 | <b>0.01</b>  | 0.03 | 39.2   | 73.1* | 2.7   | 8.2 (3.0 to 13.7)               | 16    |  |
| Suicide (X60-X84)                                                       | 7.2 | 6.4        | <b>6.0</b> | 6.3 | 6.4 | 6.9 | 6.2 | 6.4 | 7.0 | 6.7 | 7.2        | 7.7        | 7.5        | 7.9 | 7.5        | 7.3 | 7.3 | 7.8 | <b>0.03</b>  | 0.04 | 7.4    | 29.7* | 0.7   | 1.7 (1.1 to 2.3)                | 73    |  |

†Average year-to-year changes (from 1999 to 2016) in absolute mortality rates (deaths per 100,000). See text for more details.

‡Slopes from fitted model, in which joinpoint analysis<sup>30</sup> was used to plot trend lines that best fit the 17 annual mortality rates (see Methods). *Joinpoints* (grey boxes) are points of inflection when mortality trend lines changed significantly. *APC* = annual percentage rate change, the slope for the interval(s) between joinpoints. *AAPC* = average annual percent change, the slope for the entire (1999-2016) period based on the weighted average of the APCs. For brevity, the table presents APC values only for the final interval ending in 2016 (or the entire 1999-2016 period when there are no joinpoints). Tables S8 of this supplement provide all AAPC values, APC values for every segment, and related 95% confidence intervals and p values. The Joinpoint Chartbook in the online supplement displays the fitted model for each cause of death and racial-ethnic group.

\* Statistically significant changes in mortality (p < 0.05)

<sup>^</sup>APC (slope) for interval ending in 2016 differed significantly (p < 0.05) from slope of preceding period. *NJP* = no joinpoint (i.e., the fitted slope had no significant inflection between 1999 and 2016). Values equal the AAPC for the entire 1999-2016 period.

NA = Not applicable; data were inadequate for calculation

UR=Unreliable data; fewer than 20 deaths from the specified cause of death in the given year and racial-ethnic group.

1. Arrhythmias, cardiomyopathy, heart failure, cardiac arrest, myocarditis, and valvular and pericardial disease.
2. Also includes deaths from submersion, smoke, and flames
3. Disorders of autonomic nervous system, hydrocephalus, toxic encephalopathy, and other disorders of nervous system, not elsewhere classified
4. Respiratory failure, not elsewhere classified, and other respiratory disorders
5. Intestinal infections, tuberculosis, and zoonotic and other bacterial, sexually transmitted, spirochetal, chlamydial, rickettsial, central nervous system, arthropod-borne, and viral hemorrhagic infections
6. Nerve/nerve root/plexus disorders, polyneuropathies and other disorders of the peripheral nervous system, diseases of myoneural junction and muscle
7. Accidents involving other land, water transport, air/space, and other/unspecified transport

Notes: Grey cells with bolded borders denote joinpoints, which demarcate changes in the trend line (slope). Green shading denotes decreasing mortality (downward slopes derived from joinpoint analysis that differ significantly from zero [p < 0.05]). Red shading denotes increasing mortality (upward slopes derived from joinpoint analysis that differ significantly from zero [p < 0.05]). No shading indicates statistically stable trends (slopes that did not differ significantly from zero). Rows with no color and diagonal hashmarks had inadequate data, due to unreported mortality rates for certain years, to perform joinpoint analysis. Nadirs (mortality rates significantly below 2016 rates) are underlined and bolded. See text for methods for calculating average year-to-year increases and excess deaths. Increases in midlife mortality among NH blacks from venous/lymphatic diseases (I80-I89); alcohol poisoning (X45); miscellaneous urinary system diseases, including glomerular and renotubular interstitial diseases and urolithiasis (N00-N15, N20-39); epilepsy/episodic, paroxysmal disorders (G40-G47); miscellaneous endocrine disorders, including thyroid disease (E00-E07, 15-16, 20-34, 40-46); and miscellaneous injuries, such as from mechanical forces and electricity (W20-W64, W75-W99, X10-X39, X50-59) were statistically significant on two-point comparisons but were not confirmed on joinpoint analysis and are not presented here. The same was true for mortality from car accidents (V40-V49) among Hispanics and pedestrian/cyclist/motorcycle injury (V01-V29) among NH Asians and Pacific Islanders. For brevity, data are not shown here for deaths aggregated by broad categories (e.g., circulatory system disorders), those making relatively small contributions to increasing mortality (average year-to-year increase ≤ 0.01/100,000 during 1999-2016), and increases that lacked statistical significance on two-point comparisons (with support from joinpoint analysis). Additional data are available in Tables S2-S4 of the online supplement.

**TABLE S4: MORTALITY RATES FROM ALL CAUSES AND BROAD CATEGORIES OF CAUSES OF DEATH (COMPLETE LIST), AGES 25-64 YEARS, 1999-2016, BY RACE-ETHNICITY**

|                                                                                       | 1999  | 2000         | 2001  | 2002        | 2003  | 2004       | 2005  | 2006        | 2007  | 2008        | 2009        | 2010         | 2011         | 2012        | 2013  | 2014         | 2015         | 2016  | Changes in mortality rates                           |           |                          |               |       | Excess deaths |
|---------------------------------------------------------------------------------------|-------|--------------|-------|-------------|-------|------------|-------|-------------|-------|-------------|-------------|--------------|--------------|-------------|-------|--------------|--------------|-------|------------------------------------------------------|-----------|--------------------------|---------------|-------|---------------|
|                                                                                       |       |              |       |             |       |            |       |             |       |             |             |              |              |             |       |              |              |       | Average absolute year-to-year changes (per 100,000)† |           | Proportional (%) changes |               |       |               |
|                                                                                       |       |              |       |             |       |            |       |             |       |             |             |              |              |             |       |              |              |       | 1999-2016                                            | 2012-2016 | 2016 vs 1999             | 2016 vs nadir | AAPC‡ |               |
| <b>ALL-CAUSE MORTALITY</b>                                                            |       |              |       |             |       |            |       |             |       |             |             |              |              |             |       |              |              |       |                                                      |           |                          |               |       |               |
| NH AIAN                                                                               | 439.8 | <b>425.8</b> | 444.6 | 453.0       | 474.1 | 458.7      | 477.0 | 464.4       | 462.2 | 471.9       | 477.2       | 479.7        | 482.7        | 492.6       | 502.6 | 526.0        | 548.7        | 556.8 | 6.9                                                  | 14.8      | 26.6*                    | 30.8*         | 1.4*  | 1,531         |
| NH API                                                                                | 177.6 | 174.1        | 173.1 | 164.8       | 160.4 | 153.9      | 155.7 | 152.4       | 146.7 | 144.3       | 142.1       | 141.2        | 142.8        | 143.8       | 143.2 | 139.9        | <b>139.3</b> | 145.6 | -1.9                                                 | 0.6       | -18.0*                   | 4.5*          | -1.3* | (2,316)       |
| NH blacks                                                                             | 656.1 | 646.7        | 636.7 | 629.6       | 623.8 | 598.1      | 593.4 | 577.8       | 558.1 | 535.2       | 523.4       | 503.5        | 496.1        | 491.3       | 492.8 | <b>490.2</b> | 495.9        | 509.8 | -8.6                                                 | 2.7       | -22.3*                   | 4.0*          | -1.5* | (27,338)      |
| NH whites                                                                             | 338.9 | 340.6        | 342.4 | 341.5       | 340.6 | 333.9      | 336.3 | 334.5       | 330.9 | 333.0       | 332.2       | <b>328.0</b> | 332.7        | 332.4       | 335.5 | 341.3        | 347.1        | 356.6 | 1.0                                                  | 4.8       | 5.2*                     | 8.7*          | 0.2*  | 18,882        |
| Hispanics                                                                             | 284.3 | 281.7        | 279.5 | 274.6       | 272.8 | 260.5      | 261.2 | 255.2       | 247.6 | 241.0       | 238.0       | 228.9        | <b>224.6</b> | 226.5       | 226.1 | 225.7        | 226.8        | 234.8 | -2.9                                                 | 2.1       | -17.4*                   | 4.6*          | -1.2* | (9,991)       |
| <b>EXTERNAL CAUSES (V01-Y89)</b>                                                      |       |              |       |             |       |            |       |             |       |             |             |              |              |             |       |              |              |       |                                                      |           |                          |               |       |               |
| NH AIAN                                                                               | 99.8  | <b>94.4</b>  | 94.5  | 108.9       | 109.2 | 107.4      | 115.8 | 120.0       | 114.4 | 114.6       | 120.6       | 119.9        | 125.6        | 133.2       | 127.4 | 138.2        | 147.6        | 157.2 | 3.4                                                  | 6.3       | 57.5*                    | 66.5*         | 2.5*  | 752           |
| NH API                                                                                | 23.6  | 22.9         | 21.5  | 21.6        | 22.3  | 21.9       | 21.7  | 21.5        | 21.5  | 19.8        | <b>19.4</b> | 20.5         | 20.5         | 21.3        | 20.6  | 20.3         | 20.4         | 22.0  | -0.1                                                 | 0.3       | -6.8                     | 13.4*         | -0.5  | (62)          |
| NH blacks                                                                             | 76.6  | 76.6         | 76.4  | 78.1        | 77.6  | 77.1       | 80.5  | 83.2        | 79.5  | 72.6        | 69.9        | <b>68.0</b>  | 69.9         | 71.5        | 72.9  | 73.3         | 81.6         | 94.1  | 1.0                                                  | 4.8       | 22.8*                    | 38.4*         | 1.3*  | 3,845         |
| NH whites                                                                             | 52.8  | 53.6         | 56.1  | 59.8        | 61.3  | 63.1       | 65.3  | 68.3        | 70.6  | 71.4        | 70.0        | 71.6         | 74.5         | 75.2        | 76.0  | 78.9         | 84.7         | 93.6  | 2.4                                                  | 3.8       | 77.3*                    | NA            | 3.5*  | 43,733        |
| Hispanics                                                                             | 47.6  | 46.6         | 48.0  | 48.2        | 48.8  | 46.9       | 48.2  | 49.3        | 47.5  | 44.3        | 42.2        | <b>40.6</b>  | 41.2         | 41.5        | 41.8  | 42.2         | 45.1         | 51.4  | 0.2                                                  | 2.0       | 7.9*                     | 26.5*         | 0.4   | 1,338         |
| <b>ORGAN DISEASES</b>                                                                 |       |              |       |             |       |            |       |             |       |             |             |              |              |             |       |              |              |       |                                                      |           |                          |               |       |               |
| <b>Diseases of the circulatory system (I00-I99)</b>                                   |       |              |       |             |       |            |       |             |       |             |             |              |              |             |       |              |              |       |                                                      |           |                          |               |       |               |
| NH AIAN                                                                               | 91.7  | 93.2         | 94.1  | 90.8        | 101.2 | 90.2       | 96.7  | 91.1        | 89.1  | <b>87.2</b> | 89.3        | 88.9         | 90.1         | 87.2        | 93.5  | 94.1         | 102.0        | 97.7  | 0.4                                                  | 1.5       | 6.5                      | 12.0*         | 0.4   | 81            |
| NH API                                                                                | 52.3  | 49.6         | 47.3  | 45.4        | 45.2  | 41.0       | 42.1  | 40.8        | 38.1  | 37.7        | 36.7        | 35.3         | 35.9         | 36.0        | 36.9  | 35.3         | 35.1         | 35.7  | -1.0                                                 | 0.0       | -31.7*                   | NA            | -2.1* | (1,259)       |
| NH blacks                                                                             | 202.1 | 198.9        | 194.9 | 191.8       | 190.1 | 180.7      | 177.3 | 170.6       | 164.2 | 159.1       | 154.7       | 149.7        | 145.3        | 145.2       | 145.6 | 144.9        | 145.4        | 147.3 | -3.2                                                 | 0.4       | -27.1*                   | NA            | -1.9* | (10,313)      |
| NH whites                                                                             | 91.0  | 89.7         | 86.8  | 86.2        | 84.4  | 81.0       | 80.0  | 78.5        | 76.3  | 76.0        | 74.1        | 73.6         | 73.5         | <b>73.2</b> | 73.4  | 74.2         | 74.6         | 75.6  | -0.9                                                 | 0.4       | -17.0*                   | 3.2*          | -1.1* | (16,571)      |
| Hispanics                                                                             | 70.6  | 68.1         | 64.5  | 66.4        | 63.1  | 61.2       | 60.5  | 58.3        | 56.3  | 53.2        | 52.9        | 51.1         | 49.4         | 48.8        | 48.7  | 48.5         | 48.9         | 49.3  | -1.3                                                 | 0.0       | -30.1*                   | NA            | -2.1* | (4,414)       |
| <b>Diseases of the respiratory system (J00-J98)</b>                                   |       |              |       |             |       |            |       |             |       |             |             |              |              |             |       |              |              |       |                                                      |           |                          |               |       |               |
| NH AIAN                                                                               | 22.2  | 22.9         | 21.8  | <b>21.2</b> | 26.7  | 21.6       | 23.4  | 21.4        | 23.2  | 28.6        | 30.6        | 25.1         | 25.4         | 24.5        | 24.8  | 28.9         | 27.1         | 27.1  | 0.3                                                  | 0.3       | 22.0                     | 27.8*         | 1.4*  | 62            |
| NH API                                                                                | 5.8   | 6.1          | 5.8   | 5.1         | 5.2   | 4.5        | 4.9   | 4.4         | 4.4   | 4.8         | 5.5         | <b>4.2</b>   | 4.8          | 4.5         | 5.1   | 5.2          | 4.6          | 5.1   | 0.0                                                  | 0.1       | -11.7                    | 21.5*         | -1.1  | (35)          |
| NH blacks                                                                             | 29.1  | 28.5         | 27.2  | 26.4        | 26.5  | 25.0       | 25.5  | 23.5        | 23.1  | 24.7        | 24.6        | <b>22.2</b>  | 22.8         | 22.6        | 24.7  | 24.9         | 24.2         | 25.2  | -0.2                                                 | 0.5       | -13.5                    | 13.1*         | -0.7* | (661)         |
| NH whites                                                                             | 18.7  | 18.6         | 18.5  | 18.2        | 18.5  | 17.7       | 18.6  | <b>17.7</b> | 17.7  | 18.9        | 20.3        | 18.3         | 19.5         | 18.8        | 20.3  | 21.3         | 20.4         | 21.1  | 0.1                                                  | 0.3       | 12.9*                    | 19.3*         | 0.7*  | 2,610         |
| Hispanics                                                                             | 10.4  | 10.7         | 9.8   | 10.0        | 9.9   | 9.3        | 9.7   | 8.9         | 8.4   | 9.1         | 11.2        | 9.0          | 8.6          | <b>8.6</b>  | 9.4   | 10.1         | 8.7          | 9.5   | -0.1                                                 | 0.2       | -8.5                     | 10.9*         | -0.7  | (147)         |
| <b>Diseases of the digestive system (K00-K92)</b>                                     |       |              |       |             |       |            |       |             |       |             |             |              |              |             |       |              |              |       |                                                      |           |                          |               |       |               |
| NH AIAN                                                                               | 55.6  | <b>53.0</b>  | 55.5  | 56.7        | 58.1  | 55.8       | 55.7  | 54.8        | 63.2  | 65.7        | 60.0        | 66.1         | 66.3         | 69.2        | 73.2  | 74.9         | 79.8         | 79.0  | 1.4                                                  | 2.5       | 42.1*                    | 49.1*         | 2.3*  | 307           |
| NH API                                                                                | 5.5   | 6.2          | 5.8   | 5.9         | 5.3   | 5.3        | 5.8   | 5.9         | 5.3   | 5.6         | 5.7         | 5.5          | 5.5          | 5.3         | 5.5   | 5.2          | 5.6          | 5.7   | 0.0                                                  | 0.0       | 2.9                      | NA            | -0.3  | 16            |
| NH blacks                                                                             | 28.6  | 28.6         | 28.2  | 25.8        | 26.4  | 24.9       | 23.3  | 22.0        | 22.5  | 21.6        | 21.1        | 20.6         | 20.8         | 20.1        | 20.7  | 19.9         | 19.7         | 19.6  | -0.5                                                 | -0.2      | -31.4*                   | NA            | -2.4* | (1,698)       |
| NH whites                                                                             | 17.6  | 17.8         | 18.2  | 18.4        | 18.5  | 18.2       | 18.3  | 18.6        | 19.0  | 19.5        | 19.8        | 20.2         | 20.8         | 21.3        | 21.7  | 22.1         | 22.9         | 22.6  | 0.3                                                  | 0.4       | 28.8*                    | NA            | 1.6*  | 5,463         |
| Hispanics                                                                             | 24.9  | 24.5         | 23.8  | 23.9        | 23.6  | 21.9       | 21.7  | 21.6        | 22.0  | 22.1        | 21.8        | 21.5         | 21.9         | 22.3        | 21.5  | 22.2         | 21.8         | 21.6  | -0.2                                                 | -0.1      | -13.5*                   | NA            | -0.8* | (659)         |
| <b>Endocrine, nutritional and metabolic diseases (E00-E88)</b>                        |       |              |       |             |       |            |       |             |       |             |             |              |              |             |       |              |              |       |                                                      |           |                          |               |       |               |
| NH AIAN                                                                               | 31.9  | <b>26.9</b>  | 27.8  | 30.7        | 31.8  | 30.1       | 32.3  | 32.0        | 27.7  | 27.9        | 29.5        | 32.8         | 34.5         | 34.5        | 33.5  | 36.6         | 37.5         | 39.4  | 0.4                                                  | 1.0       | 23.5*                    | 46.3*         | 1.5*  | 105           |
| NH API                                                                                | 6.0   | 5.9          | 6.3   | 5.9         | 6.3   | 6.1        | 6.2   | 6.5         | 6.4   | 6.0         | 6.3         | 5.8          | 5.9          | 6.4         | 6.5   | 6.2          | 6.3          | 6.8   | 0.1                                                  | 0.2       | 15.1                     | NA            | 0.4   | 89            |
| NH blacks                                                                             | 33.3  | 32.1         | 32.6  | 33.7        | 33.3  | 32.0       | 32.2  | 31.8        | 30.9  | 28.6        | <b>28.5</b> | 28.5         | 29.7         | 28.6        | 29.8  | 30.7         | 31.8         | 32.2  | -0.1                                                 | 0.5       | -3.5                     | 12.9*         | -0.2  | (146)         |
| NH whites                                                                             | 12.7  | 13.3         | 13.5  | 14.0        | 14.1  | 13.9       | 14.2  | 14.2        | 13.9  | 13.9        | 14.0        | 13.7         | <b>14.7</b>  | 14.4        | 14.9  | 15.4         | 16.0         | 16.1  | 0.2                                                  | 0.3       | 26.4*                    | NA            | 1.4*  | 3,590         |
| Hispanics                                                                             | 16.2  | 16.2         | 16.1  | 16.0        | 16.7  | 14.8       | 15.7  | 14.3        | 14.1  | 13.9        | 13.3        | 13.3         | <b>13.2</b>  | 13.4        | 13.6  | 13.7         | 13.6         | 14.4  | -0.1                                                 | 0.2       | -11.3*                   | 8.9*          | -1.0* | (326)         |
| <b>Mental and behavioral disorders (F01-F99)</b>                                      |       |              |       |             |       |            |       |             |       |             |             |              |              |             |       |              |              |       |                                                      |           |                          |               |       |               |
| NH AIAN                                                                               | 17.7  | 14.2         | 16.6  | 14.7        | 18.4  | 18.4       | 17.5  | 18.9        | 13.3  | 13.7        | 12.1        | <b>11.7</b>  | 13.1         | 14.6        | 13.8  | 17.9         | 17.7         | 17.7  | 0.0                                                  | 0.9       | -0.1                     | 51.8*         | 0.9   | 5             |
| NH API                                                                                | 0.7   | 0.9          | 0.8   | 1.1         | 1.2   | 1.1        | 1.2   | 1.5         | 1.0   | 1.0         | 1.0         | 0.9          | 0.9          | 1.2         | 1.1   | 1.1          | 1.2          | 1.2   | 0.0                                                  | 0.1       | 68.8                     | NA            | 2.3   | 41            |
| NH blacks                                                                             | 9.8   | 9.3          | 9.7   | 9.1         | 9.0   | 8.5        | 8.5   | 9.3         | 6.9   | 6.0         | <b>5.8</b>  | 5.9          | 5.7          | <b>5.7</b>  | 6.0   | 6.0          | 5.9          | 6.5   | -0.2                                                 | 0.2       | -33.6*                   | 14.5*         | -2.6* | (605)         |
| NH whites                                                                             | 4.6   | 4.8          | 5.0   | 5.3         | 5.6   | 6.0        | 6.1   | 6.5         | 5.1   | 5.1         | <b>4.9</b>  | 5.3          | 5.5          | 5.8         | 6.0   | 6.3          | 6.7          | 7.4   | 0.2                                                  | 0.4       | 61.1*                    | 51.0*         | 2.7*  | 2,996         |
| Hispanics                                                                             | 5.5   | 5.1          | 4.9   | 5.2         | 5.2   | 4.8        | 5.5   | 5.4         | 3.7   | 3.5         | 3.3         | 3.3          | <b>3.2</b>   | 3.3         | 3.8   | 3.6          | 3.6          | 3.9   | -0.1                                                 | 0.1       | -29.1*                   | 22.0*         | -1.8  | (312)         |
| <b>Diseases of the nervous system (G00-G98)</b>                                       |       |              |       |             |       |            |       |             |       |             |             |              |              |             |       |              |              |       |                                                      |           |                          |               |       |               |
| NH AIAN                                                                               | 5.5   | 5.9          | 7.2   | <b>5.4</b>  | 5.8   | 7.3        | 8.5   | 7.5         | 7.7   | 8.4         | 9.2         | 7.6          | 9.2          | 7.7         | 9.9   | 9.5          | 11.0         | 10.9  | 0.3                                                  | 0.4       | 99.8*                    | 19.5*         | 3.7*  | 70            |
| NH API                                                                                | 2.2   | 2.3          | 2.2   | 2.3         | 2.3   | <b>1.9</b> | 2.4   | 2.3         | 2.2   | 2.7         | 2.3         | 2.5          | 2.3          | 2.7         | 3.1   | 2.9          | 2.8          | 2.8   | 0.0                                                  | 0.1       | 27.6                     | 47.5*         | 1.7*  | 55            |
| NH blacks                                                                             | 10.2  | 10.5         | 10.6  | 10.6        | 11.1  | 10.7       | 11.2  | 11.2        | 11.0  | 11.3        | 11.6        | 11.0         | 11.0         | 11.9        | 11.6  | 12.6         | 12.3         | 12.2  | 0.1                                                  | 0.2       | 20.4*                    | NA            | 1.0*  | 399           |
| NH whites                                                                             | 7.1   | 7.6          | 7.6   | 7.8         | 7.9   | 7.9        | 8.3   | 8.3         | 8.4   | 8.6         | 8.8         | 8.8          | 8.8          | 8.9         | 9.3   | 9.3          | 9.5          | 9.8   | 0.2                                                  | 0.2       | 38.9*                    | NA            | 1.6*  | 2,955         |
| Hispanics                                                                             | 3.7   | 4.2          | 3.9   | 4.3         | 4.6   | 4.3        | 4.5   | 4.5         | 4.6   | 4.5         | 4.6         | 4.5          | 4.6          | 4.5         | 5.0   | 4.8          | 5.2          | 5.2   | 0.1                                                  | 0.1       | 40.4*                    | NA            | 1.4*  | 336           |
| <b>Diseases of the genitourinary system (N00-N98)</b>                                 |       |              |       |             |       |            |       |             |       |             |             |              |              |             |       |              |              |       |                                                      |           |                          |               |       |               |
| NH AIAN                                                                               | 8.1   | 8.7          | 10.5  | 9.2         | 9.1   | 8.2        | 7.5   | 9.4         | 8.3   | 9.7         | 8.7         | 8.6          | <b>7.3</b>   | 7.7         | 8.5   | 10.5         | 10.1         | 10.4  | 0.1                                                  | 0.6       | 29.0*                    | 42.5*         | 0.4   | 30            |
| NH API                                                                                | 2.4   | 2.3          | 2.8   | 2.5         | 2.1   | 2.2        | 2.4   | 2.4         | 2.3   | 2.5         | 2.2         | 2.3          | 2.0          | 2.1         | 2.3   | 2.1          | 2.3          | 2.3   | 0.0                                                  | 0.1       | -7.9                     | NA            | -0.7  | (14)          |
| NH blacks                                                                             | 14.7  | 15.2         | 15.5  | 15.5        | 16.4  | 16.2       | 15.6  | 15.5        | 15.1  | 14.9        | 14.3        | 14.3         | 12.9         | 13.2        | 13.0  | <b>12.7</b>  | 13.6         | 13.8  | -0.1                                                 | 0.2       | -6.1                     | 8.1*          | -0.4  | (193)         |
| NH whites                                                                             | 3.4   | 3.5          | 3.6   | 3.7         | 3.9   | 3.9        | 3.9   | 4.1         | 4.0   | 4.0         | 4.1         | 4.1          | <b>3.8</b>   | 3.9         | 4.0   | 4.1          | 4.4          | 4.6   | 0.1                                                  | 0.1       | 35.7*                    | 18.9*         | 1.8*  | 1,278         |
| Hispanics                                                                             | 4.7   | 4.4          | 4.5   | 4.6         | 4.9   | 4.8        | 4.7   | 5.0         | 4.8   | 5.1         | 5.2         | 4.8          | 4.2          | 4.4         | 4.2   | 4.2          | 4.4          | 4.7   | 0.0                                                  | 0.1       | -0.8                     | NA            | 0.2   | (5)           |
| <b>Congenital malformations, deformations and chromosomal abnormalities (Q00-Q99)</b> |       |              |       |             |       |            |       |             |       |             |             |              |              |             |       |              |              |       |                                                      |           |                          |               |       |               |
| NH AIAN                                                                               | UR    | UR           | UR    | UR          | UR    | UR         | 1.7   | UR          | UR    | UR          | UR          | 1.6          | UR           | 1.5         | 1.5   | 1.5          | 1.6          | 2.3   | NA                                                   | 0.2       | NA                       | NA            | NA    | 10            |
| NH API                                                                                | 0.6   | 0.6          |       |             |       |            |       |             |       |             |             |              |              |             |       |              |              |       |                                                      |           |                          |               |       |               |

|                                                                                                          |      |      |      |            |     |     |     |     |            |     |     |     |            |     |     |            |     |     |      |     |        |        |       |       |
|----------------------------------------------------------------------------------------------------------|------|------|------|------------|-----|-----|-----|-----|------------|-----|-----|-----|------------|-----|-----|------------|-----|-----|------|-----|--------|--------|-------|-------|
| NH whites                                                                                                | 1.0  | 1.1  | 1.1  | 1.2        | 1.1 | 1.1 | 1.1 | 1.0 | 1.1        | 1.1 | 1.1 | 1.0 | 1.2        | 1.2 | 1.1 | 1.2        | 1.2 | 1.2 | 0.0  | 0.0 | 14.7*  | NA     | 0.5*  | 161   |
| Hispanics                                                                                                | 1.2  | 1.3  | 1.2  | 1.2        | 1.2 | 1.1 | 1.1 | 1.1 | 0.9        | 1.0 | 1.1 | 1.0 | 0.9        | 0.9 | 1.1 | 1.2        | 1.0 | 1.0 | 0.0  | 0.0 | -16.3  | NA     | -0.9  | (38)  |
| <b>Diseases of the skin and subcutaneous tissue (L00-L98)</b>                                            |      |      |      |            |     |     |     |     |            |     |     |     |            |     |     |            |     |     |      |     |        |        |       |       |
| NH AIAN                                                                                                  | UR   | UR   | UR   | UR         | UR  | UR  | UR  | UR  | UR         | UR  | UR  | UR  | UR         | UR  | 1.4 | 1.4        | UR  | 1.9 | NA   | NA  | NA     | NA     | NA    | -     |
| NH API                                                                                                   | UR   | UR   | UR   | UR         | UR  | UR  | UR  | 0.3 | UR         | UR  | UR  | UR  | 0.3        | 0.3 | 0.2 | 0.2        | UR  | 0.3 | NA   | NA  | NA     | NA     | NA    | (5)   |
| NH blacks                                                                                                | 1.4  | 1.2  | 1.3  | 1.5        | 1.6 | 1.4 | 1.3 | 1.1 | 1.2        | 1.1 | 1.2 | 1.1 | 1.1        | 1.2 | 1.1 | 1.0        | 1.2 | 1.1 | 0.0  | 0.0 | -18.2  | NA     | -1.5* | (47)  |
| NH whites                                                                                                | 0.3  | 0.3  | 0.4  | 0.4        | 0.4 | 0.4 | 0.4 | 0.5 | 0.4        | 0.4 | 0.5 | 0.5 | 0.5        | 0.4 | 0.5 | 0.5        | 0.5 | 0.5 | 0.0  | 0.0 | 65.0*  | NA     | 2.6*  | 227   |
| Hispanics                                                                                                | 0.3  | 0.4  | 0.5  | 0.4        | 0.6 | 0.5 | 0.4 | 0.4 | 0.4        | 0.4 | 0.4 | 0.4 | 0.4        | 0.3 | 0.4 | 0.4        | 0.4 | 0.4 | 0.0  | 0.0 | 47.4   | NA     | -0.5  | 27    |
| <b>Pregnancy, childbirth and the puerperium (O00-O99)</b>                                                |      |      |      |            |     |     |     |     |            |     |     |     |            |     |     |            |     |     |      |     |        |        |       |       |
| NH AIAN                                                                                                  | UR   | UR   | UR   | UR         | UR  | UR  | UR  | UR  | UR         | UR  | UR  | UR  | UR         | UR  | UR  | UR         | UR  | UR  | UR   | NA  | NA     | NA     | NA    | NA    |
| NH API                                                                                                   | UR   | UR   | UR   | UR         | 0.3 | 0.3 | 0.4 | 0.5 | 0.4        | 0.3 | 0.3 | 0.4 | 0.4        | 0.3 | 0.4 | 0.4        | 0.4 | 0.4 | NA   | 0.1 | NA     | NA     | NA    | 16    |
| NH blacks                                                                                                | 0.6  | 0.6  | 0.6  | 0.6        | 0.8 | 0.9 | 1.0 | 1.0 | 0.9        | 1.0 | 1.1 | 1.1 | 1.2        | 1.4 | 1.5 | 1.5        | 1.5 | 1.6 | 0.1  | 0.3 | 167.9* | NA     | 6.4*  | 192   |
| NH whites                                                                                                | 0.1  | 0.1  | 0.1  | 0.1        | 0.2 | 0.2 | 0.3 | 0.3 | 0.3        | 0.3 | 0.4 | 0.3 | 0.4        | 0.4 | 0.5 | 0.5        | 0.5 | 0.6 | 0.0  | 0.1 | 411.0* | NA     | 12.2* | 482   |
| Hispanics                                                                                                | 0.3  | 0.3  | 0.3  | <b>0.3</b> | 0.3 | 0.4 | 0.4 | 0.4 | 0.4        | 0.4 | 0.5 | 0.4 | 0.3        | 0.5 | 0.5 | 0.5        | 0.5 | 0.5 | 0.0  | 0.2 | 101.5* | 106.3* | 3.3*  | 60    |
| <b>Symptoms, signs and abnormal clinical and laboratory findings, not elsewhere classified (R00-R99)</b> |      |      |      |            |     |     |     |     |            |     |     |     |            |     |     |            |     |     |      |     |        |        |       |       |
| NH AIAN                                                                                                  | 5.7  | 7.4  | 8.1  | 8.5        | 6.9 | 5.5 | 6.0 | 4.8 | 6.7        | 7.8 | 5.3 | 6.4 | 6.7        | 8.0 | 7.4 | 8.0        | 5.8 | 7.6 | 0.1  | 0.2 | 32.5   | NA     | 0.3   | 23    |
| NH API                                                                                                   | 1.5  | 2.4  | 3.1  | 1.3        | 1.2 | 1.3 | 1.2 | 1.3 | 1.0        | 1.2 | 1.5 | 1.0 | 1.2        | 1.3 | 1.2 | 1.4        | 1.1 | 1.3 | 0.0  | 0.0 | -17.2  | NA     | -2.6* | (25)  |
| NH blacks                                                                                                | 10.3 | 11.2 | 10.4 | 10.0       | 9.9 | 7.8 | 8.6 | 6.7 | 7.1        | 8.1 | 9.2 | 6.3 | 5.7        | 6.2 | 5.7 | <u>5.7</u> | 5.9 | 6.4 | -0.2 | 0.1 | -37.4* | 12.2*  | -3.9* | (722) |
| NH whites                                                                                                | 4.5  | 6.3  | 6.7  | 5.4        | 5.6 | 4.6 | 5.2 | 4.3 | <b>3.9</b> | 5.0 | 6.0 | 4.0 | 4.0        | 4.4 | 4.4 | 4.2        | 4.4 | 4.5 | 0.0  | 0.1 | -0.4   | 15.4*  | -1.7* | (50)  |
| Hispanics                                                                                                | 3.0  | 6.3  | 6.3  | 3.4        | 3.1 | 3.2 | 3.2 | 2.7 | 2.9        | 3.2 | 3.0 | 2.3 | <u>2.1</u> | 2.5 | 2.5 | 2.5        | 2.7 | 3.1 | 0.0  | 0.2 | 6.5    | 51.2*  | -3.4* | 9     |

† Average year-to-year changes (from 1999 to 2016) in absolute mortality rates (deaths per 100,000). See text for more details.

‡ AAPC = average annual percent change, based on joinpoint analysis (see Methods). See Table S8 for complete jointpoint data (including relevant APC values for each segment) and the Joinpoint Chartbook for displays of the fitted model by cause of death and racial-ethnic group.

\* Statistically significant changes in mortality ( $p < 0.05$ )

NA = Not applicable; data were inadequate for calculation

UR = Unreliable data; fewer than 20 deaths from the specified cause of death in the given year and racial-ethnic group.

Notes: Nadirs (mortality rates significantly below 2016 rates) are underlined and bolded. See text for methods for calculating average year-to-year increases and excess deaths. No statistically significant increases by race-ethnicity were reported at the broad categorical level for neoplasms (C00-D48), infectious and parasitic diseases (A00-B99), and diseases of the musculoskeletal system and connective tissue (M00-M99). Data were suppressed (unreliable) by race-ethnicity for diseases of the eye and adnexa (H00-H57), diseases of the ear and mastoid process (H60-H93), certain conditions originating in the perinatal period (P00-P96), and codes for special purposes (U00-U99).



**TABLE S5: MORTALITY RATES FROM EXTERNAL CAUSES (COMPLETE LIST), AGES 25-64 YEARS, 1999-2016, BY RACE-ETHNICITY**

|                                                                     | 1999 | 2000 | 2001       | 2002 | 2003       | 2004 | 2005       | 2006       | 2007 | 2008       | 2009 | 2010        | 2011 | 2012 | 2013       | 2014        | 2015 | 2016 | Changes in mortality rates                           |           |                          |               |       | Excess deaths |
|---------------------------------------------------------------------|------|------|------------|------|------------|------|------------|------------|------|------------|------|-------------|------|------|------------|-------------|------|------|------------------------------------------------------|-----------|--------------------------|---------------|-------|---------------|
|                                                                     |      |      |            |      |            |      |            |            |      |            |      |             |      |      |            |             |      |      | Average absolute year-to-year changes (per 100,000)† |           | Proportional (%) changes |               |       |               |
|                                                                     |      |      |            |      |            |      |            |            |      |            |      |             |      |      |            |             |      |      | 1999-2016                                            | 2012-2016 | 2016 vs 1999             | 2016 vs nadir | AAPC  |               |
|                                                                     |      |      |            |      |            |      |            |            |      |            |      |             |      |      |            |             |      |      |                                                      |           |                          |               |       |               |
| <b>Accidental drug poisoning (X40-X44)</b>                          |      |      |            |      |            |      |            |            |      |            |      |             |      |      |            |             |      |      |                                                      |           |                          |               |       |               |
| NH AIAN                                                             | 7.0  | 6.7  | 8.1        | 10.6 | 13.6       | 15.5 | 17.1       | 17.8       | 18.0 | 20.5       | 24.9 | 23.4        | 24.8 | 28.0 | 27.0       | 31.0        | 32.7 | 35.9 | 1.70                                                 | 2.22      | 411.4*                   | NA            | 10.9* | 370           |
| NH API                                                              | 0.9  | 0.9  | 0.8        | 1.0  | 1.2        | 1.3  | 1.5        | 1.6        | 1.7  | 1.6        | 1.6  | 1.7         | 2.1  | 2.4  | 2.5        | 2.5         | 3.1  | 3.6  | 0.16                                                 | 0.30      | 300.6*                   | NA            | 8.2*  | 258           |
| NH blacks                                                           | 10.2 | 10.0 | 10.4       | 11.4 | 11.4       | 11.8 | 13.8       | 16.3       | 14.1 | 12.1       | 11.9 | <u>11.6</u> | 12.9 | 12.9 | 14.5       | 15.5        | 18.1 | 25.5 | 0.90                                                 | 2.51      | 149.6*                   | 119.1*        | 5.8*  | 3,187         |
| NH whites                                                           | 6.2  | 6.8  | 7.7        | 10.1 | 11.4       | 12.6 | 14.2       | 16.7       | 18.1 | 18.7       | 19.2 | 20.3        | 22.4 | 22.4 | 24.0       | 26.3        | 30.1 | 37.0 | 1.81                                                 | 2.91      | 494.3*                   | NA            | 11.1* | 33,003        |
| Hispanics                                                           | 7.9  | 6.6  | 6.2        | 7.4  | 7.8        | 7.1  | 8.0        | 9.1        | 8.4  | 8.2        | 8.2  | <u>7.8</u>  | 8.7  | 9.0  | 9.6        | 9.8         | 11.2 | 14.3 | 0.37                                                 | 1.11      | 80.0*                    | 83.3*         | 4.3*  | 1,777         |
| <b>Accidental alcohol poisoning (X45)</b>                           |      |      |            |      |            |      |            |            |      |            |      |             |      |      |            |             |      |      |                                                      |           |                          |               |       |               |
| NH AIAN                                                             | 2.2  | UR   | UR         | UR   | UR         | UR   | UR         | 2.1        | 4.6  | 7.6        | 8.2  | 9.3         | 9.1  | 9.8  | 9.7        | 9.8         | 9.9  | 10.2 | NA                                                   | 0.21      | 366.6*                   | NA            | NA    | 104           |
| NH API                                                              | UR   | UR   | UR         | UR   | UR         | UR   | UR         | UR         | UR   | 0.3        | 0.2  | 0.3         | 0.3  | 0.3  | 0.4        | 0.2         | 0.2  | 0.3  | NA                                                   | 0.02      | NA                       | NA            | NA    | 7             |
| NH blacks                                                           | 0.2  | 0.2  | 0.2        | 0.3  | 0.2        | 0.1  | <u>0.1</u> | 0.2        | 0.5  | 0.7        | 0.8  | 0.8         | 0.7  | 0.8  | 0.8        | 0.9         | 0.9  | 0.8  | 0.03                                                 | 0.02      | 242.0*                   | 461.5*        | 7.6   | 116           |
| NH whites                                                           | 0.2  | 0.2  | 0.2        | 0.2  | 0.2        | 0.2  | 0.2        | 0.2        | 0.7  | 1.1        | 1.1  | 1.2         | 1.2  | 1.2  | 1.2        | 1.2         | 1.2  | 1.2  | 0.06                                                 | 0.01      | 674.5*                   | NA            | 12.3* | 1,146         |
| Hispanics                                                           | 0.3  | 0.2  | 0.2        | 0.3  | <u>0.2</u> | 0.2  | 0.3        | 0.2        | 0.9  | 1.1        | 1.1  | 1.2         | 1.2  | 1.1  | 1.2        | 1.2         | 1.3  | 1.2  | 0.06                                                 | 0.00      | 354.0*                   | 657.7*        | 10.5* | 224           |
| <b>Suicide (X60-X84)</b>                                            |      |      |            |      |            |      |            |            |      |            |      |             |      |      |            |             |      |      |                                                      |           |                          |               |       |               |
| NH AIAN                                                             | 14.9 | 15.5 | 17.2       | 16.8 | 16.6       | 20.4 | 18.6       | 18.6       | 18.6 | 18.5       | 19.3 | 20.6        | 21.4 | 21.7 | 23.6       | 24.0        | 25.8 | 28.4 | 0.80                                                 | 1.40      | 91.2*                    | NA            | 3.5*  | 176           |
| NH API                                                              | 7.2  | 6.4  | <u>6.0</u> | 6.3  | 6.4        | 6.9  | 6.2        | 6.4        | 7.0  | 6.7        | 7.2  | 7.7         | 7.5  | 7.9  | 7.5        | 7.3         | 7.3  | 7.8  | 0.03                                                 | 0.04      | 7.4                      | 29.7*         | 0.7   | 73            |
| NH blacks                                                           | 7.2  | 7.1  | 7.2        | 7.3  | 7.1        | 7.2  | 7.1        | 7.0        | 7.0  | <u>7.0</u> | 7.1  | 7.4         | 7.5  | 7.8  | 7.6        | 7.5         | 7.6  | 8.2  | 0.06                                                 | 0.14      | 13.7*                    | 17.7*         | 0.6*  | 213           |
| NH whites                                                           | 15.6 | 15.7 | 16.6       | 17.3 | 17.4       | 17.7 | 17.7       | 18.4       | 19.2 | 20.0       | 20.4 | 21.1        | 21.6 | 22.1 | 22.1       | 22.7        | 23.5 | 23.3 | 0.45                                                 | 0.35      | 49.4*                    | NA            | 2.5*  | 8,300         |
| Hispanics                                                           | 7.1  | 7.0  | 7.0        | 7.1  | 6.9        | 7.2  | 6.9        | <u>6.7</u> | 7.7  | 7.0        | 7.3  | 7.3         | 7.2  | 7.3  | 7.2        | 8.0         | 7.7  | 8.6  | 0.09                                                 | 0.29      | 21.9*                    | 28.9*         | 1.2*  | 426           |
| <b>Homicide (X85-Y09)</b>                                           |      |      |            |      |            |      |            |            |      |            |      |             |      |      |            |             |      |      |                                                      |           |                          |               |       |               |
| NH AIAN                                                             | 13.5 | 10.3 | <u>9.3</u> | 12.0 | 10.0       | 9.9  | 11.0       | 11.6       | 10.1 | 11.8       | 11.1 | 12.0        | 11.7 | 11.9 | 11.9       | 12.2        | 13.4 | 14.5 | 0.06                                                 | 0.56      | 7.6*                     | 55.3*         | 1.2*  | 19            |
| NH API                                                              | 3.4  | 3.6  | 3.1        | 3.2  | 3.0        | 2.8  | 2.9        | 2.9        | 2.5  | 2.0        | 2.3  | 2.2         | 2.2  | 2.3  | 1.9        | 1.9         | 1.8  | 2.1  | -0.07                                                | -0.02     | -37.5*                   | NA            | -3.7* | (101)         |
| NH blacks                                                           | 22.8 | 23.6 | 23.7       | 25.1 | 25.1       | 24.5 | 25.6       | 26.2       | 25.5 | 23.4       | 22.2 | 21.8        | 21.9 | 23.2 | 22.9       | <u>21.7</u> | 25.5 | 27.6 | 0.29                                                 | 1.15      | 21.4*                    | 27.2*         | 1.1   | 1,005         |
| NH whites                                                           | 3.5  | 3.4  | 3.6        | 3.5  | 3.3        | 3.4  | 3.3        | 3.3        | 3.5  | 3.6        | 3.2  | <u>3.1</u>  | 3.2  | 3.3  | 3.1        | 3.1         | 3.4  | 3.8  | 0.01                                                 | 0.11      | 7.2*                     | 21.8*         | 0.4   | 267           |
| Hispanics                                                           | 8.4  | 8.4  | 8.1        | 8.1  | 8.3        | 7.8  | 8.2        | 7.9        | 7.5  | 7.2        | 6.7  | 6.0         | 5.6  | 5.7  | <u>5.3</u> | 5.4         | 5.8  | 6.4  | -0.12                                                | 0.16      | -23.5*                   | 22.0*         | -1.6* | (408)         |
| <b>Accidental falls, drowning, fire (W00-W19, W65-W74, X00-X09)</b> |      |      |            |      |            |      |            |            |      |            |      |             |      |      |            |             |      |      |                                                      |           |                          |               |       |               |
| NH AIAN                                                             | 8.3  | 9.2  | 8.2        | 9.8  | 9.0        | 8.8  | 9.6        | 8.0        | 8.1  | <u>7.8</u> | 8.4  | 8.9         | 8.6  | 11.0 | 10.6       | 10.7        | 9.8  | 11.6 | 0.19                                                 | 0.59      | 39.3                     | 49.0*         | 1.3   | 43            |
| NH API                                                              | 1.9  | 2.0  | 2.0        | 1.8  | 1.9        | 1.9  | 1.9        | 2.3        | 2.3  | 1.8        | 1.9  | 1.9         | 2.0  | 2.0  | 2.2        | 2.1         | 1.8  | 2.0  | 0.01                                                 | -0.01     | 5.1                      | NA            | 0.2   | 5             |
| NH blacks                                                           | 5.6  | 5.4  | 5.5        | 5.0  | 5.0        | 5.3  | 4.9        | 4.7        | 4.6  | 4.3        | 4.6  | 4.3         | 4.4  | 4.1  | 4.1        | 4.0         | 4.1  | 4.3  | -0.08                                                | -0.02     | -24.0*                   | NA            | -1.9* | (249)         |
| NH whites                                                           | 3.7  | 3.8  | 3.8        | 3.9  | 4.0        | 4.1  | 4.2        | 4.2        | 4.3  | 4.2        | 4.2  | 4.4         | 4.2  | 4.2  | 4.3        | 4.4         | 4.3  | 4.4  | 0.04                                                 | 0.03      | 19.4*                    | NA            | 1.0*  | 768           |
| Hispanics                                                           | 3.4  | 3.3  | 3.6        | 3.6  | 3.6        | 3.5  | 3.5        | 3.8        | 3.5  | 3.4        | 3.2  | 3.2         | 3.4  | 3.0  | 3.1        | 3.1         | 3.2  | 3.4  | 0.00                                                 | 0.00      | 1.7                      | NA            | -0.3  | 11            |

| Pedestrian, cyclist, and motorcycle injury in transport accident (V01-V29)                      |      |      |      |      |      |      |      |      |      |      |            |            |            |      |      |      |      |      |       |      |        |       |       |       |
|-------------------------------------------------------------------------------------------------|------|------|------|------|------|------|------|------|------|------|------------|------------|------------|------|------|------|------|------|-------|------|--------|-------|-------|-------|
| NH AIAN                                                                                         | 9.7  | 8.7  | 9.6  | 10.0 | 10.1 | 9.9  | 10.7 | 12.3 | 10.7 | 10.9 | 9.6        | 9.0        | 9.7        | 11.9 | 10.2 | 9.7  | 11.6 | 11.8 | 0.14  | 0.42 | 21.4   | NA    | 0.8   | 28    |
| NH API                                                                                          | 1.7  | 1.8  | 1.6  | 1.9  | 1.5  | 1.9  | 2.0  | 1.9  | 1.8  | 1.6  | <u>1.4</u> | 1.7        | 1.5        | 1.6  | 1.7  | 1.7  | 1.7  | 2.1  | 0.03  | 0.13 | 28.2   | 54.3* | 0.3   | 46    |
| NH blacks                                                                                       | 5.4  | 5.5  | 5.5  | 5.4  | 5.6  | 5.8  | 6.0  | 6.0  | 6.1  | 5.7  | 5.1        | <u>4.9</u> | 5.1        | 5.5  | 5.7  | 5.5  | 6.4  | 6.6  | 0.06  | 0.31 | 23.7*  | 36.5* | 1.2   | 203   |
| NH whites                                                                                       | 3.4  | 3.5  | 3.8  | 4.0  | 4.1  | 4.4  | 4.6  | 4.9  | 4.8  | 4.9  | 4.4        | 4.3        | 4.4        | 4.7  | 4.3  | 4.3  | 4.7  | 5.1  | 0.09  | 0.14 | 50.1*  | NA    | 2.4*  | 1,404 |
| Hispanics                                                                                       | 4.6  | 4.5  | 4.9  | 4.6  | 5.0  | 4.6  | 4.7  | 4.9  | 4.6  | 4.4  | <u>3.8</u> | 3.9        | 4.0        | 4.3  | 4.3  | 4.1  | 4.4  | 4.9  | 0.02  | 0.20 | 7.5    | 30.7* | 0.1   | 114   |
| Other land transport and water, air, space, and other/unspecified transport accidents (V80-V99) |      |      |      |      |      |      |      |      |      |      |            |            |            |      |      |      |      |      |       |      |        |       |       |       |
| NH AIAN                                                                                         | 13.4 | 14.5 | 13.2 | 15.5 | 14.8 | 13.4 | 15.3 | 16.8 | 15.0 | 13.0 | 13.4       | 12.2       | 14.8       | 13.5 | 13.2 | 15.7 | 16.1 | 15.0 | 0.09  | 0.04 | 11.9   | NA    | 0.2   | 20    |
| NH API                                                                                          | 3.2  | 2.9  | 2.7  | 2.3  | 2.7  | 2.5  | 2.3  | 2.0  | 2.0  | 2.1  | 1.9        | 1.7        | 1.8        | 1.6  | 1.8  | 1.8  | 1.8  | 1.9  | -0.08 | 0.02 | -42.7* | NA    | -2.7* | (100) |
| NH blacks                                                                                       | 6.4  | 6.7  | 6.1  | 5.3  | 5.8  | 5.7  | 5.5  | 6.2  | 5.7  | 5.4  | 5.8        | 5.7        | <u>5.2</u> | 5.8  | 6.3  | 6.4  | 6.9  | 7.5  | 0.07  | 0.45 | 17.7*  | 42.8* | 1.1   | 264   |
| NH whites                                                                                       | 6.7  | 6.8  | 6.5  | 6.1  | 5.9  | 6.3  | 6.5  | 6.6  | 6.5  | 6.3  | <u>5.9</u> | 6.2        | 5.9        | 6.5  | 6.6  | 6.6  | 7.0  | 7.2  | 0.03  | 0.27 | 7.8*   | 23.5* | 0.2   | 561   |
| Hispanics                                                                                       | 5.4  | 5.5  | 5.4  | 4.0  | 4.4  | 4.2  | 4.2  | 4.9  | 5.0  | 4.5  | 3.7        | 3.8        | <u>3.4</u> | 3.9  | 4.3  | 4.4  | 4.8  | 5.1  | -0.02 | 0.34 | -5.5   | 49.1* | 0.4   | 32    |

† Average year-to-year changes (from 1999 to 2016) in absolute mortality rates (deaths per 100,000). See text for more details.

‡ AAPC = average annual percent change, based on joinpoint analysis (see Methods). See Table S8 for complete jointpoint data (including relevant APC values for each segment) and the Joinpoint Chartbook for displays of the fitted model by cause of death and racial-ethnic group.

\* Statistically significant changes in mortality ( $p < 0.05$ )

NA = Not applicable; data were inadequate for calculation

UR = Unreliable data; fewer than 20 deaths from the specified cause of death in the given year and racial-ethnic group.

Notes: Nadirs (mortality rates significantly below 2016 rates) are underlined and bolded. See text for methods for calculating average year-to-year increases and excess deaths.

TABLE S6: MORTALITY RATES FOR ORGAN DISEASES (COMPLETE LIST), AGES 25-64 YEARS 1999-2016, BY RACE-ETHNICITY

|                                                                               | 1999 | 2000        | 2001 | 2002        | 2003       | 2004       | 2005 | 2006       | 2007       | 2008        | 2009 | 2010 | 2011        | 2012 | 2013 | 2014 | 2015 | 2016 | Changes in mortality rates                           |           |                          |               |       | Excess deaths |
|-------------------------------------------------------------------------------|------|-------------|------|-------------|------------|------------|------|------------|------------|-------------|------|------|-------------|------|------|------|------|------|------------------------------------------------------|-----------|--------------------------|---------------|-------|---------------|
|                                                                               |      |             |      |             |            |            |      |            |            |             |      |      |             |      |      |      |      |      | Average absolute year-to-year changes (per 100,000)† |           | Proportional (%) changes |               |       |               |
|                                                                               |      |             |      |             |            |            |      |            |            |             |      |      |             |      |      |      |      |      | 1999-2016                                            | 2012-2016 | 2016 vs 1999             | 2016 vs nadir | AAPC  |               |
| <b>Hypertensive diseases (I10-I15)</b>                                        |      |             |      |             |            |            |      |            |            |             |      |      |             |      |      |      |      |      |                                                      |           |                          |               |       |               |
| NH AIAN                                                                       | 3.9  | 4.3         | 4.1  | 4.1         | 7.3        | 7.7        | 7.2  | 8.1        | 7.7        | 8.0         | 9.5  | 10.1 | 9.3         | 9.5  | 12.4 | 13.5 | 13.8 | 14.3 | 0.61                                                 | 1.01      | 269.3*                   | NA            | 7.8*  | 134           |
| NH API                                                                        | 3.1  | <u>2.6</u>  | 3.3  | 3.1         | 2.9        | 3.4        | 3.4  | 3.3        | 3.0        | 3.2         | 3.0  | 3.2  | 3.0         | 3.0  | 3.3  | 3.8  | 3.7  | 4.0  | 0.05                                                 | 0.19      | 28.3*                    | 51.9*         | 1.2*  | 93            |
| NH blacks                                                                     | 24.7 | 25.1        | 25.4 | 26.7        | 28.4       | 28.0       | 26.8 | 26.9       | 26.6       | 27.4        | 28.0 | 26.9 | 26.5        | 27.3 | 27.4 | 27.7 | 28.2 | 28.5 | 0.23                                                 | 0.40      | 15.5*                    | NA            | 0.7*  | 725           |
| NH whites                                                                     | 3.8  | 4.0         | 4.3  | 4.8         | 5.2        | 5.3        | 5.5  | 5.8        | 5.8        | 6.4         | 6.6  | 6.6  | 7.0         | 7.2  | 7.7  | 8.2  | 8.4  | 8.8  | 0.29                                                 | 0.36      | 129.8*                   | NA            | 5.1*  | 5,318         |
| Hispanics                                                                     | 4.7  | 4.9         | 5.2  | 5.9         | 6.0        | 5.7        | 5.8  | 5.8        | 6.0        | 6.1         | 6.2  | 6.1  | 5.6         | 6.0  | 6.2  | 6.3  | 6.5  | 6.6  | 0.11                                                 | 0.21      | 40.6*                    | NA            | 1.9*  | 410           |
| <b>Arrhythmias, heart failure, and other forms of heart disease (I30-I51)</b> |      |             |      |             |            |            |      |            |            |             |      |      |             |      |      |      |      |      |                                                      |           |                          |               |       |               |
| NH AIAN                                                                       | 15.7 | 15.7        | 16.3 | <u>14.9</u> | 18.2       | 16.0       | 17.2 | 17.4       | 17.5       | 17.4        | 17.1 | 17.4 | 16.1        | 16.2 | 17.6 | 15.7 | 20.5 | 20.1 | 0.26                                                 | 0.79      | 27.7                     | 34.9*         | 0.9*  | 57            |
| NH API                                                                        | 6.4  | 6.3         | 5.7  | 6.3         | 5.1        | 5.5        | 6.1  | 5.4        | 4.9        | 5.1         | 5.2  | 4.9  | 4.9         | 5.3  | 5.7  | 5.6  | 5.3  | 5.1  | -0.08                                                | 0.03      | -20.5*                   | NA            | -1.0* | (102)         |
| NH blacks                                                                     | 37.7 | 35.6        | 35.8 | 35.4        | 35.0       | 33.7       | 33.8 | 32.6       | 32.4       | 31.7        | 30.9 | 30.1 | <u>28.3</u> | 29.0 | 30.2 | 30.3 | 31.2 | 32.2 | -0.32                                                | 0.78      | -14.5*                   | 13.8*         | -0.9* | (948)         |
| NH whites                                                                     | 14.2 | 13.8        | 13.7 | 13.8        | 13.6       | 13.3       | 13.4 | 13.4       | 13.2       | <u>13.0</u> | 13.1 | 13.3 | 13.4        | 13.3 | 13.8 | 14.1 | 14.6 | 15.0 | 0.05                                                 | 0.33      | 6.0*                     | 15.6*         | 0.4*  | 916           |
| Hispanics                                                                     | 9.4  | 8.8         | 8.4  | 8.3         | 9.0        | 8.0        | 8.1  | 8.1        | 8.1        | 7.6         | 8.0  | 7.9  | 8.0         | 7.6  | 8.0  | 8.0  | 7.8  | 8.2  | -0.07                                                | 0.05      | -12.7*                   | NA            | -0.7* | (187)         |
| <b>Pulmonary heart disease (I26-I28)</b>                                      |      |             |      |             |            |            |      |            |            |             |      |      |             |      |      |      |      |      |                                                      |           |                          |               |       |               |
| NH AIAN                                                                       | 2.8  | 2.0         | 2.1  | 1.9         | 3.2        | 2.2        | 2.6  | 2.7        | 2.3        | 1.9         | 2.2  | 2.5  | 2.7         | 1.8  | 1.8  | 2.4  | 2.4  | 2.9  | 0.00                                                 | 0.03      | 2.4                      | NA            | -0.1  | 2             |
| NH API                                                                        | 0.8  | 0.8         | 0.8  | 0.5         | 0.7        | 0.7        | 0.7  | 0.6        | 0.6        | 0.6         | 0.6  | 0.5  | 0.5         | 0.5  | 0.7  | 0.4  | 0.5  | 0.7  | -0.01                                                | 0.04      | -16.8                    | NA            | -2.0* | (5)           |
| NH blacks                                                                     | 6.3  | 5.9         | 6.0  | 5.9         | 6.0        | 5.5        | 5.6  | 5.2        | 4.7        | <u>4.7</u>  | 5.3  | 5.1  | 5.1         | 5.3  | 5.1  | 5.2  | 5.5  | 5.5  | -0.05                                                | 0.09      | -12.3                    | 17.9*         | -0.8* | (126)         |
| NH whites                                                                     | 2.5  | 2.6         | 2.6  | 2.6         | 2.6        | 2.4        | 2.4  | 2.2        | <u>2.1</u> | 2.2         | 2.2  | 2.2  | 2.2         | 2.2  | 2.4  | 2.3  | 2.5  | 2.5  | 0.01                                                 | 0.06      | 3.6                      | 19.7*         | 0.0   | 93            |
| Hispanics                                                                     | 1.4  | 1.5         | 1.4  | 1.4         | 1.4        | 1.4        | 1.2  | 1.2        | 1.1        | 1.1         | 1.2  | 1.0  | 1.1         | 1.0  | 1.0  | 1.1  | 1.2  | 1.2  | -0.01                                                | 0.02      | -13.5                    | NA            | -0.9  | (28)          |
| <b>Diseases of veins, lymphatic vessels and lymph nodes (I80-I89)</b>         |      |             |      |             |            |            |      |            |            |             |      |      |             |      |      |      |      |      |                                                      |           |                          |               |       |               |
| NH AIAN                                                                       | UR   | UR          | UR   | UR          | UR         | UR         | UR   | UR         | UR         | UR          | UR   | UR   | UR          | UR   | UR   | UR   | UR   | UR   | UR                                                   | UR        | UR                       | UR            | UR    | UR            |
| NH API                                                                        | UR   | UR          | UR   | UR          | UR         | UR         | UR   | UR         | UR         | UR          | UR   | UR   | UR          | UR   | UR   | UR   | UR   | 2.3  | NA                                                   | NA        | NA                       | NA            | NA    | NA            |
| NH blacks                                                                     | 1.5  | 2.1         | 2.0  | 2.2         | 2.2        | 2.3        | 2.2  | 1.9        | 2.0        | 2.0         | 1.9  | 2.1  | 2.2         | 1.8  | 2.3  | 2.3  | 2.1  | 2.3  | 0.05                                                 | 0.02      | 51.9*                    | NA            | 0.7   | 146           |
| NH whites                                                                     | 0.7  | 0.9         | 0.8  | 0.9         | 0.9        | 0.9        | 0.9  | 0.8        | 0.8        | 0.8         | 0.9  | 0.9  | 1.0         | 1.0  | 1.0  | 0.9  | 0.9  | 1.0  | 0.02                                                 | 0.01      | 51.5*                    | NA            | 1.3*  | 376           |
| Hispanics                                                                     | 0.6  | 0.7         | 0.5  | 0.6         | 0.7        | 0.7        | 0.8  | 0.5        | 0.6        | 0.6         | 0.6  | 0.7  | 0.6         | 0.7  | 0.5  | 0.6  | 0.5  | 0.5  | -0.01                                                | -0.01     | -17.7*                   | NA            | -0.8  | (32)          |
| <b>Alcoholic liver disease (K70)</b>                                          |      |             |      |             |            |            |      |            |            |             |      |      |             |      |      |      |      |      |                                                      |           |                          |               |       |               |
| NH AIAN                                                                       | 29.3 | <u>27.3</u> | 27.6 | 28.7        | 29.8       | 27.6       | 29.3 | 28.9       | 33.6       | 34.9        | 32.5 | 39.3 | 38.8        | 41.4 | 44.7 | 44.5 | 50.3 | 48.6 | 1.14                                                 | 1.96      | 65.9*                    | 78.0*         | 3.5*  | 254           |
| NH API                                                                        | 1.2  | 1.6         | 1.4  | 1.5         | 1.2        | 1.3        | 1.5  | 1.6        | 1.6        | 1.6         | 1.8  | 1.4  | 1.8         | 1.4  | 1.7  | 1.8  | 2.0  | 2.0  | 0.04                                                 | 0.04      | 62.9*                    | NA            | 2.0*  | 68            |
| NH blacks                                                                     | 7.7  | 7.2         | 6.8  | 5.8         | 5.8        | 5.4        | 5.1  | <u>4.3</u> | 4.9        | 4.8         | 4.5  | 4.7  | 5.0         | 4.6  | 4.9  | 5.0  | 5.3  | 5.2  | -0.14                                                | 0.04      | -31.6*                   | 20.4*         | -2.3* | (418)         |
| NH whites                                                                     | 5.8  | 5.9         | 5.9  | <u>5.8</u>  | 5.9        | 6.0        | 6.0  | 6.1        | 6.8        | 6.9         | 7.0  | 7.3  | 7.6         | 7.9  | 8.2  | 8.5  | 9.2  | 9.4  | 0.21                                                 | 0.37      | 62.4*                    | 63.0*         | 2.9*  | 3,901         |
| Hispanics                                                                     | 10.4 | 10.7        | 10.3 | 9.6         | 9.4        | <u>8.7</u> | 8.7  | 8.9        | 9.3        | 9.1         | 9.1  | 9.2  | 9.4         | 9.3  | 9.1  | 9.9  | 10.2 | 10.4 | 0.00                                                 | 0.21      | 0.6                      | 20.3*         | -0.2  | 131           |
| <b>Liver cancer (C22)</b>                                                     |      |             |      |             |            |            |      |            |            |             |      |      |             |      |      |      |      |      |                                                      |           |                          |               |       |               |
| NH AIAN                                                                       | 3.2  | 4.6         | 4.1  | 3.5         | 4.9        | 5.5        | 4.2  | 4.3        | 5.7        | 5.4         | 5.5  | 5.4  | 5.7         | 6.4  | 7.6  | 5.7  | 7.4  | 6.8  | 0.21                                                 | 0.22      | 115.1*                   | NA            | 4.0*  | 45            |
| NH API                                                                        | 8.2  | 7.7         | 6.8  | 7.3         | 6.7        | 6.9        | 6.3  | 6.3        | 6.3        | 5.8         | 5.9  | 5.7  | 6.4         | 6.1  | 6.0  | 5.7  | 5.6  | 5.4  | -0.16                                                | -0.21     | -34.0*                   | NA            | -2.0* | (225)         |
| NH blacks                                                                     | 4.8  | 5.4         | 5.4  | 5.4         | 5.9        | 5.9        | 6.5  | 6.6        | 6.5        | 7.0         | 7.5  | 7.7  | 7.7         | 7.6  | 7.7  | 7.6  | 7.2  | 7.2  | 0.14                                                 | -0.10     | 49.5*                    | NA            | 2.2*  | 430           |
| NH whites                                                                     | 2.2  | 2.4         | 2.4  | 2.6         | 2.7        | 2.8        | 3.0  | 3.0        | 3.2        | 3.4         | 3.6  | 3.7  | 4.0         | 4.1  | 4.1  | 4.1  | 4.2  | 4.0  | 0.11                                                 | 0.01      | 80.0*                    | NA            | 3.7*  | 1,931         |
| Hispanics                                                                     | 4.0  | 4.2         | 4.4  | 4.5         | 4.9        | 5.0        | 5.4  | 5.1        | 5.0        | 5.3         | 5.5  | 5.3  | 5.7         | 5.9  | 6.1  | 5.5  | 5.4  | 5.6  | 0.10                                                 | -0.01     | 41.8*                    | NA            | 2.2*  | 333           |
| <b>Pancreatic cancer (C25)</b>                                                |      |             |      |             |            |            |      |            |            |             |      |      |             |      |      |      |      |      |                                                      |           |                          |               |       |               |
| NH AIAN                                                                       | 3.2  | 4.2         | 2.8  | 4.1         | 4.0        | 5.5        | 4.0  | 3.5        | 4.4        | 3.9         | 4.4  | 5.4  | 4.4         | 5.0  | 4.4  | 4.1  | 4.5  | 4.9  | 0.11                                                 | 0.11      | 56.7                     | NA            | 1.8*  | 22            |
| NH API                                                                        | 3.4  | 2.7         | 3.0  | 3.1         | 3.3        | 3.5        | 3.4  | 3.1        | 3.0        | 2.9         | 3.0  | 2.8  | 3.2         | 3.1  | 2.8  | 2.8  | 2.9  | 3.3  | -0.01                                                | 0.03      | -2.7                     | NA            | -0.4  | 8             |
| NH blacks                                                                     | 8.1  | 7.6         | 7.3  | 7.6         | 7.9        | 7.7        | 7.6  | 7.6        | 7.6        | 7.6         | 7.4  | 7.2  | <u>7.1</u>  | 7.5  | 7.3  | 7.4  | 7.6  | 7.8  | -0.01                                                | 0.15      | -3.1                     | 10.6*         | -0.2  | (29)          |
| NH whites                                                                     | 5.3  | 5.3         | 5.3  | 5.2         | <u>5.1</u> | 5.3        | 5.4  | 5.4        | 5.4        | 5.4         | 5.5  | 5.6  | 5.4         | 5.5  | 5.4  | 5.6  | 5.5  | 5.5  | 0.01                                                 | 0.03      | 3.3                      | 7.6*          | 0.3*  | 188           |
| Hispanics                                                                     | 3.7  | 3.6         | 3.7  | 3.7         | 3.8        | 3.7        | 4.0  | 3.7        | 3.6        | 3.8         | 3.7  | 3.8  | 3.8         | 3.9  | 3.7  | 3.9  | 3.9  | 3.8  | 0.01                                                 | 0.01      | 2.6                      | NA            | 0.3*  | 24            |
| <b>Chronic lower respiratory diseases (J40-J47)</b>                           |      |             |      |             |            |            |      |            |            |             |      |      |             |      |      |      |      |      |                                                      |           |                          |               |       |               |

|                                                                                                                                                                                                           |      |      |      |      |      |      |      |      |      |      |      |      |      |      |      |      |      |      |       |       |        |       |       |       |
|-----------------------------------------------------------------------------------------------------------------------------------------------------------------------------------------------------------|------|------|------|------|------|------|------|------|------|------|------|------|------|------|------|------|------|------|-------|-------|--------|-------|-------|-------|
| NH AIAN                                                                                                                                                                                                   | 9.4  | 9.9  | 9.5  | 9.4  | 12.4 | 10.5 | 10.7 | 9.9  | 11.5 | 12.2 | 11.0 | 11.6 | 10.9 | 11.8 | 10.8 | 11.6 | 13.5 | 12.3 | 0.17  | 0.28  | 30.9   | NA    | 1.4*  | 36    |
| NH API                                                                                                                                                                                                    | 2.7  | 2.5  | 2.7  | 2.1  | 2.2  | 1.7  | 1.7  | 1.7  | 1.7  | 1.8  | 1.5  | 1.4  | 1.7  | 1.6  | 1.8  | 1.6  | 1.4  | 1.5  | -0.07 | -0.03 | -44.2* | NA    | -3.6* | (91)  |
| NH blacks                                                                                                                                                                                                 | 13.7 | 13.4 | 12.4 | 12.4 | 12.0 | 11.5 | 11.9 | 11.1 | 10.6 | 11.3 | 11.0 | 10.8 | 10.8 | 11.0 | 11.5 | 11.3 | 11.3 | 11.7 | -0.12 | 0.17  | -14.7* | 9.5*  | -1.0* | (339) |
| NH whites                                                                                                                                                                                                 | 11.5 | 11.0 | 11.2 | 10.9 | 11.1 | 10.5 | 11.1 | 10.6 | 10.7 | 11.4 | 11.4 | 11.1 | 11.5 | 11.5 | 11.8 | 12.0 | 12.2 | 12.3 | 0.04  | 0.17  | 6.6*   | 17.1* | 0.5*  | 835   |
| Hispanics                                                                                                                                                                                                 | 4.1  | 3.7  | 3.7  | 3.7  | 3.5  | 3.3  | 3.3  | 3.0  | 2.9  | 3.1  | 3.0  | 3.2  | 2.9  | 2.8  | 3.1  | 2.7  | 2.9  | 3.1  | -0.06 | 0.04  | -24.8* | NA    | -1.8* | (183) |
| <b>Lung diseases due to external agents (J60-J70)</b>                                                                                                                                                     |      |      |      |      |      |      |      |      |      |      |      |      |      |      |      |      |      |      |       |       |        |       |       |       |
| NH AIAN                                                                                                                                                                                                   | UR   | 1.7  | 1.9  | UR   | 1.7  | UR   | 1.9  | 2.2  | 2.1  | NA    | NA    | NA     | NA    | NA    | 6     |
| NH API                                                                                                                                                                                                    | UR   | UR   | UR   | UR   | UR   | 0.3  | UR   | UR   | UR   | 0.2  | UR   | 0.2  | 0.2  | 0.3  | 0.4  | 0.3  | 0.3  | 0.4  | NA    | 0.03  | NA     | NA    | NA    | 16    |
| NH blacks                                                                                                                                                                                                 | 1.6  | 1.5  | 1.4  | 1.4  | 1.6  | 1.5  | 1.5  | 1.3  | 1.4  | 1.4  | 1.4  | 1.2  | 1.4  | 1.4  | 1.5  | 1.5  | 1.5  | 1.6  | 0.00  | 0.05  | -1.1   | 30.1* | 0.1   | 4     |
| NH whites                                                                                                                                                                                                 | 0.8  | 0.9  | 0.9  | 0.9  | 1.0  | 0.9  | 1.0  | 1.0  | 0.9  | 1.0  | 1.0  | 1.0  | 1.1  | 1.1  | 1.2  | 1.2  | 1.3  | 1.3  | 0.03  | 0.04  | 60.3*  | NA    | 2.4*  | 542   |
| Hispanics                                                                                                                                                                                                 | 0.4  | 0.6  | 0.6  | 0.5  | 0.5  | 0.5  | 0.5  | 0.5  | 0.5  | 0.5  | 0.5  | 0.6  | 0.5  | 0.6  | 0.6  | 0.6  | 0.7  | 0.7  | 0.01  | 0.03  | 57.4   | NA    | 1.2*  | 53    |
| <b>Diabetes mellitus (E10-E14)</b>                                                                                                                                                                        |      |      |      |      |      |      |      |      |      |      |      |      |      |      |      |      |      |      |       |       |        |       |       |       |
| NH AIAN                                                                                                                                                                                                   | 28.6 | 23.1 | 23.1 | 26.6 | 27.9 | 25.8 | 25.8 | 26.1 | 22.6 | 22.4 | 22.5 | 25.3 | 27.6 | 26.7 | 26.8 | 27.8 | 29.1 | 30.9 | 0.13  | 0.66  | 7.9    | 37.7* | 0.9   | 38    |
| NH API                                                                                                                                                                                                    | 5.1  | 4.9  | 5.2  | 4.8  | 5.0  | 5.0  | 5.1  | 5.3  | 5.0  | 4.8  | 4.8  | 4.6  | 4.6  | 5.0  | 5.0  | 4.9  | 4.8  | 5.3  | 0.01  | 0.13  | 2.5    | NA    | -0.2  | 24    |
| NH blacks                                                                                                                                                                                                 | 27.1 | 25.6 | 26.1 | 26.3 | 26.5 | 24.7 | 24.7 | 24.5 | 23.4 | 21.2 | 21.2 | 21.1 | 21.9 | 21.0 | 21.7 | 21.6 | 22.3 | 22.4 | -0.28 | 0.10  | -17.3* | 7.0*  | -1.1  | (852) |
| NH whites                                                                                                                                                                                                 | 9.3  | 9.5  | 9.7  | 9.8  | 9.9  | 9.7  | 9.7  | 9.6  | 9.3  | 9.2  | 9.1  | 8.9  | 9.6  | 9.2  | 9.5  | 9.8  | 10.2 | 10.1 | 0.05  | 0.11  | 8.9*   | 14.2* | 0.5*  | 879   |
| Hispanics                                                                                                                                                                                                 | 14.3 | 14.1 | 14.0 | 13.8 | 14.3 | 12.7 | 13.4 | 11.6 | 11.7 | 11.3 | 10.6 | 10.5 | 10.3 | 10.5 | 10.7 | 10.7 | 10.8 | 11.1 | -0.18 | 0.16  | -22.0* | NA    | -1.5* | (629) |
| <b>Obesity (E65-E68)</b>                                                                                                                                                                                  |      |      |      |      |      |      |      |      |      |      |      |      |      |      |      |      |      |      |       |       |        |       |       |       |
| NH AIAN                                                                                                                                                                                                   | UR   | UR   | 1.9  | 1.8  | 1.9  | 2.0  | 3.2  | 2.5  | 2.6  | 3.4  | 4.0  | 4.3  | 3.5  | 4.3  | 4.0  | 4.8  | 4.3  | 4.1  | NA    | 0.11  | NA     | NA    | NA    | 27    |
| NH API                                                                                                                                                                                                    | UR   | UR   | UR   | UR   | 0.3  | UR   | UR   | 0.4  | 0.3  | 0.3  | 0.4  | 0.4  | 0.3  | 0.2  | 0.4  | 0.3  | 0.5  | 0.4  | NA    | 0.03  | NA     | NA    | NA    | 6     |
| NH blacks                                                                                                                                                                                                 | 2.3  | 2.8  | 3.0  | 3.3  | 3.1  | 3.6  | 3.8  | 3.6  | 3.7  | 3.7  | 3.6  | 3.7  | 4.1  | 3.8  | 3.9  | 4.7  | 4.9  | 5.1  | 0.16  | 0.20  | 120.7* | NA    | 4.8*  | 545   |
| NH whites                                                                                                                                                                                                 | 1.2  | 1.4  | 1.5  | 1.7  | 1.8  | 1.8  | 2.0  | 2.0  | 2.0  | 2.2  | 2.2  | 2.2  | 2.3  | 2.4  | 2.4  | 2.5  | 2.7  | 2.7  | 0.09  | 0.08  | 124.6* | NA    | 4.9*  | 1,616 |
| Hispanics                                                                                                                                                                                                 | 0.8  | 0.8  | 0.9  | 1.0  | 1.1  | 1.0  | 1.0  | 1.3  | 1.2  | 1.3  | 1.3  | 1.3  | 1.3  | 1.3  | 1.4  | 1.5  | 1.4  | 1.6  | 0.05  | 0.07  | 106.6* | NA    | 3.8*  | 193   |
| <b>Metabolic disorders (E70-E88)</b>                                                                                                                                                                      |      |      |      |      |      |      |      |      |      |      |      |      |      |      |      |      |      |      |       |       |        |       |       |       |
| NH AIAN                                                                                                                                                                                                   | UR   | 2.0  | 1.9  | 1.8  | UR   | UR   | 2.4  | 3.0  | 1.8  | 1.8  | 2.1  | 2.6  | 2.4  | 2.9  | 2.2  | 3.4  | 3.5  | 3.4  | NA    | 0.21  | NA     | NA    | NA    | 11    |
| NH API                                                                                                                                                                                                    | 0.6  | 0.6  | 0.7  | 0.6  | 0.9  | 0.6  | 0.7  | 0.7  | 0.8  | 0.8  | 0.8  | 0.6  | 0.9  | 0.9  | 0.9  | 0.8  | 0.7  | 0.8  | 0.02  | 0.00  | 48.4   | NA    | 2.0*  | 22    |
| NH blacks                                                                                                                                                                                                 | 2.4  | 2.5  | 2.4  | 2.7  | 2.6  | 2.5  | 2.6  | 2.5  | 2.7  | 2.6  | 2.7  | 2.6  | 2.8  | 2.8  | 2.9  | 3.2  | 3.4  | 3.5  | 0.06  | 0.13  | 43.2*  | 47.2* | 2.0*  | 216   |
| NH whites                                                                                                                                                                                                 | 1.7  | 1.8  | 1.9  | 2.0  | 2.0  | 2.0  | 2.1  | 2.1  | 2.1  | 2.2  | 2.2  | 2.2  | 2.3  | 2.3  | 2.4  | 2.5  | 2.6  | 2.5  | 0.05  | 0.05  | 46.2*  | NA    | 2.2*  | 858   |
| Hispanics                                                                                                                                                                                                 | 0.8  | 0.9  | 1.0  | 0.9  | 1.0  | 0.8  | 1.0  | 1.0  | 0.9  | 1.0  | 1.0  | 1.1  | 1.2  | 1.3  | 1.1  | 1.2  | 1.2  | 1.3  | 0.03  | 0.02  | 60.0*  | NA    | -0.8  | 110   |
| <b>Renal failure (N17-N19)</b>                                                                                                                                                                            |      |      |      |      |      |      |      |      |      |      |      |      |      |      |      |      |      |      |       |       |        |       |       |       |
| NH AIAN                                                                                                                                                                                                   | 6.0  | 6.6  | 8.4  | 7.2  | 7.0  | 6.5  | 6.4  | 7.7  | 6.4  | 8.1  | 6.9  | 6.4  | 5.6  | 5.5  | 6.4  | 7.2  | 6.8  | 7.4  | 0.08  | 0.36  | 23.3   | NA    | -0.3  | 17    |
| NH API                                                                                                                                                                                                    | 1.9  | 1.7  | 2.2  | 2.0  | 1.6  | 1.8  | 1.7  | 1.8  | 1.7  | 1.8  | 1.7  | 1.8  | 1.4  | 1.5  | 1.7  | 1.7  | 1.8  | 1.7  | -0.01 | 0.05  | -10.8  | NA    | -0.9* | (16)  |
| NH blacks                                                                                                                                                                                                 | 12.3 | 13.0 | 13.2 | 13.2 | 14.0 | 13.9 | 13.3 | 13.1 | 12.6 | 12.3 | 11.8 | 11.5 | 11.1 | 11.1 | 10.8 | 10.6 | 11.2 | 11.3 | -0.06 | 0.04  | -8.4*  | NA    | -0.6* | (225) |
| NH whites                                                                                                                                                                                                 | 2.4  | 2.7  | 2.8  | 2.8  | 2.9  | 3.0  | 2.9  | 3.0  | 2.9  | 3.0  | 3.0  | 3.0  | 2.9  | 2.8  | 2.9  | 2.9  | 3.1  | 3.2  | 0.05  | 0.08  | 33.7*  | 13.5* | 1.6*  | 865   |
| Hispanics                                                                                                                                                                                                 | 3.6  | 3.5  | 3.5  | 3.8  | 4.1  | 3.9  | 3.8  | 3.9  | 3.7  | 4.0  | 4.1  | 3.8  | 3.3  | 3.5  | 3.3  | 3.3  | 3.4  | 3.7  | 0.01  | 0.08  | 2.9    | NA    | -0.1  | 22    |
| <b>Intestinal, tuberculosis, zoonotic and other bacterial, sexually transmitted, spirochaetal, chlamydial, rickettsial, central nervous system, arthropod-borne, viral hemorrhagic diseases (A00-A99)</b> |      |      |      |      |      |      |      |      |      |      |      |      |      |      |      |      |      |      |       |       |        |       |       |       |
| NH AIAN                                                                                                                                                                                                   | 8.0  | 7.9  | 7.3  | 8.3  | 9.9  | 9.1  | 8.3  | 9.4  | 9.8  | 9.1  | 8.9  | 9.1  | 10.7 | 8.7  | 11.2 | 11.1 | 11.2 | 10.1 | 0.13  | -0.12 | 26.6   | NA    | 1.9*  | 26    |
| NH API                                                                                                                                                                                                    | 2.2  | 2.0  | 2.0  | 2.2  | 2.3  | 2.4  | 1.8  | 2.1  | 2.1  | 2.1  | 2.2  | 2.0  | 2.3  | 2.0  | 2.1  | 2.1  | 2.3  | 2.2  | 0.00  | -0.02 | 0.0    | NA    | 0.1   | 6     |
| NH blacks                                                                                                                                                                                                 | 12.2 | 12.5 | 12.5 | 12.5 | 12.7 | 12.3 | 12.0 | 12.3 | 11.9 | 12.0 | 11.7 | 11.0 | 10.9 | 10.5 | 11.0 | 10.6 | 11.2 | 11.5 | -0.04 | 0.12  | -5.8   | 8.9*  | -0.6  | (134) |
| NH whites                                                                                                                                                                                                 | 3.7  | 3.8  | 3.9  | 4.2  | 4.3  | 4.4  | 4.4  | 4.3  | 4.6  | 4.8  | 4.9  | 4.7  | 5.0  | 5.0  | 5.3  | 5.5  | 5.6  | 5.7  | 0.12  | 0.14  | 53.9*  | NA    | 2.4*  | 2,149 |
| Hispanics                                                                                                                                                                                                 | 3.8  | 3.7  | 3.7  | 3.7  | 3.9  | 4.0  | 3.9  | 4.0  | 3.8  | 3.9  | 4.6  | 4.1  | 4.3  | 4.4  | 4.1  | 4.5  | 4.2  | 4.1  | 0.02  | -0.03 | 8.1    | NA    | 1.0*  | 65    |
| <b>Viral hepatitis (B15-B19)</b>                                                                                                                                                                          |      |      |      |      |      |      |      |      |      |      |      |      |      |      |      |      |      |      |       |       |        |       |       |       |
| NH AIAN                                                                                                                                                                                                   | 2.3  | 4.5  | 3.4  | 4.0  | 4.5  | 4.2  | 3.6  | 6.1  | 6.5  | 5.8  | 6.6  | 5.5  | 5.5  | 6.1  | 6.9  | 6.0  | 5.2  | 4.8  | 0.15  | -0.12 | 112.1* | NA    | 3.7*  | 29    |
| NH API                                                                                                                                                                                                    | 2.7  | 3.2  | 2.2  | 2.2  | 1.6  | 1.5  | 1.4  | 2.0  | 1.8  | 1.7  | 1.5  | 1.6  | 1.7  | 1.5  | 1.3  | 1.4  | 0.8  | 1.0  | -0.10 | -0.14 | -64.4* | NA    | -5.0* | (149) |
| NH blacks                                                                                                                                                                                                 | 3.4  | 3.8  | 4.0  | 4.0  | 3.9  | 3.9  | 3.7  | 4.5  | 4.2  | 4.3  | 4.1  | 3.9  | 4.0  | 3.8  | 3.6  | 3.4  | 3.0  | 2.3  | -0.07 | -0.34 | -33.4* | NA    | -2.6* | (269) |
| NH whites                                                                                                                                                                                                 | 1.8  | 2.1  | 2.2  | 2.4  | 2.3  | 2.3  | 2.3  | 2.9  | 3.0  | 3.0  | 3.1  | 2.9  | 2.9  | 2.9  | 2.8  | 2.8  | 2.5  | 2.0  | 0.02  | -0.18 | 14.3*  | NA    | 0.5   | 275   |
| Hispanics                                                                                                                                                                                                 | 3.8  | 4.1  | 4.5  | 4.1  | 3.6  | 3.6  | 3.8  | 5.2  | 4.9  | 5.0  | 4.4  | 4.4  | 4.3  | 4.3  | 4.0  | 3.4  | 3.2  | 2.5  | -0.08 | -0.36 | -35.2* | NA    | -2.4* | (429) |

† Average year-to-year changes (from 1999 to 2016) in absolute mortality rates (deaths per 100,000). See text for more details.

‡ AAPC = average annual percent change, based on joinpoint analysis (see Methods). See Table S8 for complete joinpoint data (including relevant APC values for each segment) and the Joinpoint Chartbook for displays of the fitted model by cause of death and racial-ethnic group.

\* Statistically significant changes in mortality ( $p < 0.05$ )

NA = Not applicable; data were inadequate for calculation

UR = Unreliable data; fewer than 20 deaths from the specified cause of death in the given year and racial-ethnic group.

Notes: Nadirs (mortality rates significantly below 2016 rates) are underlined and bolded. See text for methods for calculating average year-to-year increases and excess deaths. See Table S4 for data on mental and neurologic disorders.

**POPULATION COUNTS**

|                  |           |           |           |           |           |           |           |           |           |           |           |           |           |           |           |           |           |           |
|------------------|-----------|-----------|-----------|-----------|-----------|-----------|-----------|-----------|-----------|-----------|-----------|-----------|-----------|-----------|-----------|-----------|-----------|-----------|
| <b>NH AIAN</b>   | 1113901   | 1153524   | 1163639   | 1177990   | 1191091   | 1206481   | 1222947   | 1240569   | 1257653   | 1275568   | 1292267   | 1305000   | 1321909   | 1331083   | 1341390   | 1354145   | 1367725   | 1382239   |
| <b>NH API</b>    | 6105344   | 6354702   | 6733095   | 7029318   | 7311631   | 7598836   | 7897582   | 8202921   | 8489069   | 8762777   | 9017656   | 9201040   | 9477611   | 9815121   | 10107361  | 10532411  | 10932171  | 11115806  |
| <b>NH blacks</b> | 16999288  | 17226565  | 17521576  | 17776524  | 18017965  | 18321119  | 18635226  | 18965114  | 19280761  | 19578626  | 19874806  | 20104215  | 20397485  | 20627062  | 20852311  | 21168905  | 21483586  | 21753829  |
| <b>NH whites</b> | 105547575 | 105772008 | 106147193 | 106468658 | 106713073 | 107110016 | 107556206 | 108018235 | 108299657 | 108342914 | 108470953 | 108602705 | 108715096 | 108062690 | 107626908 | 107252241 | 107020536 | 106675849 |
| <b>Hispanics</b> | 15844820  | 16486088  | 17449334  | 18233331  | 18993140  | 19765613  | 20589625  | 21428413  | 22250926  | 23057584  | 23828159  | 24411039  | 25286694  | 25844725  | 26453270  | 27258367  | 27988947  | 28469499  |

**TABLE S7: MORTALITY RATES FOR MENTAL AND NEUROLOGIC DISORDERS (COMPLETE LIST), AGES 25-64 YEARS, 1999-2016, BY RACE-ETHNICITY**

|                                                                                    | 1999 | 2000 | 2001 | 2002       | 2003       | 2004 | 2005 | 2006 | 2007 | 2008       | 2009       | 2010        | 2011       | 2012       | 2013 | 2014 | 2015 | 2016 | Changes in mortality rates                           |           |                          |               |       | Excess deaths |     |
|------------------------------------------------------------------------------------|------|------|------|------------|------------|------|------|------|------|------------|------------|-------------|------------|------------|------|------|------|------|------------------------------------------------------|-----------|--------------------------|---------------|-------|---------------|-----|
|                                                                                    |      |      |      |            |            |      |      |      |      |            |            |             |            |            |      |      |      |      | Average absolute year-to-year changes (per 100,000)† |           | Proportional (%) changes |               |       |               |     |
|                                                                                    |      |      |      |            |            |      |      |      |      |            |            |             |            |            |      |      |      |      | 1999-2016                                            | 2012-2016 | 2016 vs 1999             | 2016 vs nadir | AAPC  |               |     |
| <b>Mental and behavioral disorders due to psychoactive substance use (F10-F19)</b> |      |      |      |            |            |      |      |      |      |            |            |             |            |            |      |      |      |      |                                                      |           |                          |               |       |               |     |
| NH AIAN                                                                            | 17.3 | 14.0 | 16.0 | 13.8       | 17.9       | 17.8 | 16.7 | 18.1 | 12.2 | 13.4       | 11.7       | <u>10.7</u> | 12.3       | 14.0       | 13.0 | 17.2 | 16.9 | 17.3 | 0.00                                                 | 1.02      | 0.2                      | 61.8*         | 1.1   | -             |     |
| NH API                                                                             | 0.6  | 0.6  | 0.7  | 0.9        | 0.9        | 0.9  | 1.0  | 1.2  | 0.7  | 0.6        | 0.7        | <u>0.5</u>  | 0.7        | 0.8        | 0.8  | 0.9  | 0.9  | 0.8  | 0.01                                                 | 0.03      | 39.2                     | 73.1*         | 2.7   | 3             |     |
| NH blacks                                                                          | 9.0  | 8.5  | 8.7  | 8.3        | 8.0        | 7.5  | 7.5  | 7.8  | 5.4  | 4.6        | 4.6        | 4.4         | 4.2        | <u>4.0</u> | 4.3  | 4.4  | 4.3  | 4.9  | -0.24                                                | 0.13      | -45.1*                   | 23.3*         | -3.9* | (311)         |     |
| NH whites                                                                          | 4.0  | 4.1  | 4.3  | 4.6        | 4.9        | 5.2  | 5.3  | 5.5  | 4.0  | 3.9        | <u>3.8</u> | 4.1         | 4.3        | 4.5        | 4.7  | 5.1  | 5.6  | 6.3  | 0.14                                                 | 0.40      | 58.9*                    | 66.7*         | 2.6*  | 480           |     |
| Hispanics                                                                          | 5.1  | 4.7  | 4.6  | 4.8        | 4.9        | 4.5  | 5.0  | 4.8  | 3.3  | 2.9        | 2.8        | 2.7         | <u>2.6</u> | 2.6        | 3.0  | 3.0  | 3.0  | 3.3  | -0.11                                                | 0.15      | -35.4*                   | 28.8*         | -2.5* | (1,956)       |     |
| <b>Organic mental disorders, including vascular dementia (F01-F09)</b>             |      |      |      |            |            |      |      |      |      |            |            |             |            |            |      |      |      |      |                                                      |           |                          |               |       |               |     |
| NH AIAN                                                                            | UR   | UR   | UR   | UR         | UR         | UR   | UR   | UR   | UR   | UR         | UR         | UR          | UR         | UR         | UR   | UR   | UR   | UR   | UR                                                   | UR        | UR                       | UR            | UR    | UR            | UR  |
| NH API                                                                             | UR   | UR   | UR   | UR         | UR         | UR   | UR   | UR   | UR   | UR         | UR         | UR          | UR         | UR         | 0.2  | 0.3  | UR   | UR   | 0.2                                                  | NA        | NA                       | NA            | NA    | NA            | 0   |
| NH blacks                                                                          | 0.3  | 0.5  | 0.4  | 0.4        | 0.5        | 0.4  | 0.5  | 0.9  | 0.9  | 0.9        | 0.7        | 1.0         | 1.0        | 1.1        | 1.3  | 1.1  | 1.0  | 0.9  | 0.04                                                 | -0.02     | 215.3*                   | NA            | 6.2*  | 48            |     |
| NH whites                                                                          | 0.2  | 0.2  | 0.3  | 0.3        | 0.3        | 0.3  | 0.4  | 0.6  | 0.6  | 0.7        | 0.7        | 0.7         | 0.8        | 0.8        | 0.8  | 0.7  | 0.7  | 0.6  | 0.02                                                 | -0.03     | 185.9*                   | NA            | 6.1*  | 74            |     |
| Hispanics                                                                          | 0.2  | 0.2  | 0.2  | 0.2        | 0.2        | UR   | 0.3  | 0.4  | 0.2  | 0.4        | 0.4        | 0.4         | 0.4        | 0.6        | 0.5  | 0.4  | 0.4  | 0.4  | NA                                                   | 0.01      | 113.9*                   | NA            | NA    | 209           |     |
| <b>Episodic and paroxysmal disorders, including epilepsy (G40-G47)</b>             |      |      |      |            |            |      |      |      |      |            |            |             |            |            |      |      |      |      |                                                      |           |                          |               |       |               |     |
| NH AIAN                                                                            | UR   | UR   | UR   | UR         | UR         | UR   | UR   | UR   | UR   | UR         | UR         | 1.7         | UR         | 1.6        | UR   | 1.6  | 1.9  | 1.6  | 2.1                                                  | NA        | NA                       | NA            | NA    | NA            | -   |
| NH API                                                                             | UR   | UR   | UR   | UR         | UR         | UR   | UR   | UR   | UR   | 0.3        | UR         | UR          | 0.2        | UR         | 0.3  | 0.3  | 0.4  | 0.3  | 0.3                                                  | NA        | NA                       | NA            | NA    | NA            | 0   |
| NH blacks                                                                          | 1.5  | 1.3  | 1.4  | 1.4        | 1.5        | 1.4  | 1.5  | 1.4  | 1.4  | <u>1.2</u> | 1.5        | 1.3         | 1.3        | 1.6        | 1.5  | 1.6  | 1.5  | 1.6  | 0.00                                                 | 0.05      | 2.4                      | 26.3*         | 0.5*  | 8             |     |
| NH whites                                                                          | 0.6  | 0.6  | 0.7  | 0.7        | 0.7        | 0.7  | 0.8  | 0.8  | 0.8  | 0.7        | 0.9        | 0.8         | 0.8        | 0.8        | 0.9  | 0.9  | 0.9  | 1.0  | 0.02                                                 | 0.04      | 60.6*                    | NA            | 2.4*  | 74            |     |
| Hispanics                                                                          | 0.3  | 0.5  | 0.5  | 0.6        | 0.5        | 0.4  | 0.5  | 0.6  | 0.6  | 0.5        | 0.5        | 0.5         | <u>0.4</u> | 0.6        | 0.5  | 0.6  | 0.7  | 0.6  | 0.02                                                 | 0.04      | 78.4*                    | 46.5*         | 1.5*  | 290           |     |
| <b>Cerebral palsy and other paralytic syndromes (G80-G83)</b>                      |      |      |      |            |            |      |      |      |      |            |            |             |            |            |      |      |      |      |                                                      |           |                          |               |       |               |     |
| NH AIAN                                                                            | UR   | UR   | UR   | UR         | UR         | UR   | UR   | UR   | UR   | UR         | UR         | 1.6         | UR         | UR         | UR   | 1.7  | UR   | 1.5  | 1.3                                                  | NA        | NA                       | NA            | NA    | NA            | -   |
| NH API                                                                             | UR   | UR   | UR   | UR         | UR         | UR   | UR   | UR   | UR   | UR         | UR         | UR          | UR         | UR         | UR   | UR   | UR   | 0.2  | 0.2                                                  | NA        | NA                       | NA            | NA    | NA            | (1) |
| NH blacks                                                                          | 0.6  | 0.7  | 0.9  | 1.0        | 0.9        | 0.9  | 1.1  | 1.0  | 1.0  | 1.1        | 1.0        | 1.1         | 1.0        | 0.9        | 1.0  | 1.0  | 1.2  | 1.2  | 0.03                                                 | 0.03      | 93.4*                    | NA            | 3.5*  | 47            |     |
| NH whites                                                                          | 0.5  | 0.5  | 0.6  | 0.6        | 0.6        | 0.7  | 0.7  | 0.7  | 0.7  | 0.7        | 0.8        | 0.8         | 0.8        | <u>0.8</u> | 0.9  | 0.8  | 0.9  | 0.9  | 0.02                                                 | 0.02      | 59.1*                    | 15.3*         | 3.2*  | 62            |     |
| Hispanics                                                                          | 0.3  | 0.2  | 0.3  | 0.4        | 0.4        | 0.3  | 0.4  | 0.4  | 0.4  | 0.5        | 0.5        | 0.4         | 0.3        | 0.4        | 0.4  | 0.5  | 0.5  | 0.4  | 0.01                                                 | 0.01      | 39.9                     | NA            | 2.9*  | 118           |     |
| <b>Other disorders of the nervous system (G90-G98)</b>                             |      |      |      |            |            |      |      |      |      |            |            |             |            |            |      |      |      |      |                                                      |           |                          |               |       |               |     |
| NH AIAN                                                                            | UR   | UR   | 2.5  | UR         | <u>1.7</u> | 2.2  | 2.7  | 2.1  | 2.5  | 2.8        | 2.4        | 2.9         | 3.2        | 3.1        | 2.6  | 2.7  | 2.8  | 3.5  | NA                                                   | 0.05      | NA                       | 108.9*        | NA    | -             |     |
| NH API                                                                             | 0.6  | 0.6  | 0.8  | 0.7        | 0.6        | 0.5  | 0.7  | 0.8  | 0.6  | 0.8        | 0.7        | 0.7         | 0.6        | 0.8        | 1.1  | 0.8  | 0.8  | 0.9  | 0.01                                                 | 0.05      | 32.8                     | NA            | 1.8*  | 3             |     |
| NH blacks                                                                          | 3.7  | 3.7  | 3.5  | 3.5        | 3.8        | 3.8  | 3.9  | 4.0  | 4.0  | 4.4        | 4.4        | 4.3         | 4.2        | 4.7        | 4.6  | 5.0  | 5.0  | 5.1  | 0.08                                                 | 0.17      | 35.8*                    | NA            | 2.2*  | 126           |     |
| NH whites                                                                          | 1.3  | 1.3  | 1.3  | <u>1.4</u> | 1.4        | 1.4  | 1.4  | 1.6  | 1.7  | 1.8        | 1.9        | 1.9         | 1.9        | 2.0        | 2.1  | 2.2  | 2.3  | 2.3  | 0.06                                                 | 0.08      | 78.5*                    | NA            | 3.5*  | 199           |     |
| Hispanics                                                                          | 1.0  | 1.1  | 1.1  | <u>1.0</u> | 1.1        | 1.2  | 1.2  | 1.1  | 1.3  | 1.2        | 1.3        | 1.4         | 1.3        | 1.3        | 1.5  | 1.4  | 1.6  | 1.5  | 0.03                                                 | 0.03      | 42.0*                    | 47.6*         | 2.5*  | 470           |     |

† Average year-to-year changes (from 1999 to 2016) in absolute mortality rates (deaths per 100,000). See text for more details.

‡ AAPC = average annual percent change, based on joinpoint analysis (see Methods). See Table S8 for complete joinpoint data (including relevant APC values for each segment) and the Joinpoint Chartbook for displays of the fitted model by cause of death and racial-ethnic group.

\* Statistically significant changes in mortality (p < 0.05)

NA = Not applicable; data were inadequate for calculation

UR = Unreliable data; fewer than 20 deaths from the specified cause of death in the given year and racial-ethnic group.

Notes: Nadirs (mortality rates significantly below 2016 rates) are underlined and bolded. See text for methods for calculating average year-to-year increases and excess deaths.

**POPULATION COUNTS**

|                  |           |           |           |           |           |           |           |           |           |           |           |           |           |           |           |           |           |           |
|------------------|-----------|-----------|-----------|-----------|-----------|-----------|-----------|-----------|-----------|-----------|-----------|-----------|-----------|-----------|-----------|-----------|-----------|-----------|
| <b>NH AIAN</b>   | 1113901   | 1153524   | 1163639   | 1177990   | 1191091   | 1206481   | 1222947   | 1240569   | 1257653   | 1275568   | 1292267   | 1305000   | 1321909   | 1331083   | 1341390   | 1354145   | 1367725   | 1382239   |
| <b>NH API</b>    | 6105344   | 6354702   | 6733095   | 7029318   | 7311631   | 7598836   | 7897582   | 8202921   | 8489069   | 8762777   | 9017656   | 9201040   | 9477611   | 9815121   | 10107361  | 10532411  | 10932171  | 11115806  |
| <b>NH blacks</b> | 16999288  | 17226565  | 17521576  | 17776524  | 18017965  | 18321119  | 18635226  | 18965114  | 19280761  | 19578626  | 19874806  | 20104215  | 20397485  | 20627062  | 20852311  | 21168905  | 21483586  | 21753829  |
| <b>NH whites</b> | 105547575 | 105772008 | 106147193 | 106468658 | 106713073 | 107110016 | 107556206 | 108018235 | 108299657 | 108342914 | 108470953 | 108602705 | 108715096 | 108062690 | 107626908 | 107252241 | 107020536 | 106675849 |
| <b>Hispanics</b> | 15844820  | 16486088  | 17449334  | 18233331  | 18993140  | 19765613  | 20589625  | 21428413  | 22250926  | 23057584  | 23828159  | 24411039  | 25286694  | 25844725  | 26453270  | 27258367  | 27988947  | 28469499  |

## SUPPLEMENTAL FIGURES S1-S25

### TABLE OF CONTENTS

**Figure S1. All-cause mortality**

#### **Broad categories**

**Figure S2. External causes (V01-Y89)**

**Figure S3. Diseases of the circulatory system (I00-I99)**

**Figure S4. Diseases of the digestive system (K00-K92)**

**Figure S5. Diseases of the respiratory system (J00-J98)**

**Figure S6. Endocrine, nutritional and metabolic diseases (E00-E88)**

**Figure S7. Diseases of the nervous system (G00-G98)**

**Figure S8. Mental and behavioral disorders (F01-F99)**

**Figure S9. Diseases of the genitourinary system (N00-N98)**

**Figure S10. Pregnancy, childbirth and the puerperium (O00-O99)**

**Figure S11. Diseases of the blood and immune mechanism (D50-D89)**

**Figure S12. Diseases of the musculoskeletal system and connective tissue (M00-M99)**

**Figure S13. Congenital malformations, deformations and chromosomal abnormalities (Q00-Q99)**

**Figure S14. Infectious and parasitic diseases (A00-B99)**

**Figure S15. Neoplasms (C00-D48)**

**Figure S16. Diseases of the skin and subcutaneous tissue (L00-L98)**

**Figure S17. Symptoms, signs, and abnormal clinical and laboratory findings, *NOC* (R00-R99)**

#### **Specific causes of death (presented as small panels in Figure 2 of main paper)**

**Figure S18. Drug overdoses**

**Figure S19. Suicides**

**Figure S20. Alcoholic liver disease**

**Figure S21. Hypertensive diseases**

**Figure S22. Malignant neoplasm of liver and intrahepatic bile ducts**

**Figure S23: Diseases of the respiratory system (see Figure S5)**

**Figure S24: Mental and behavioral disorders involving psychoactive substances**

**Figure S25: Homicides**

ICD-10 codes in parentheses. *NOC* = not elsewhere classified. In this analysis, causes of death were classified into 20 broad categories. Graphs are not included for four categories with unreliable data (due to small death counts): (1) eye and adnexal diseases (ICD-10 codes H00-H57); (2) ear and mastoid diseases (H60-H93); (3) perinatal conditions (P00-P96); and (4) codes for special purposes (U00-U99).



**Figure S1. All-cause mortality, US adults ages 25-64 years, 1999-2016, by race-ethnicity**

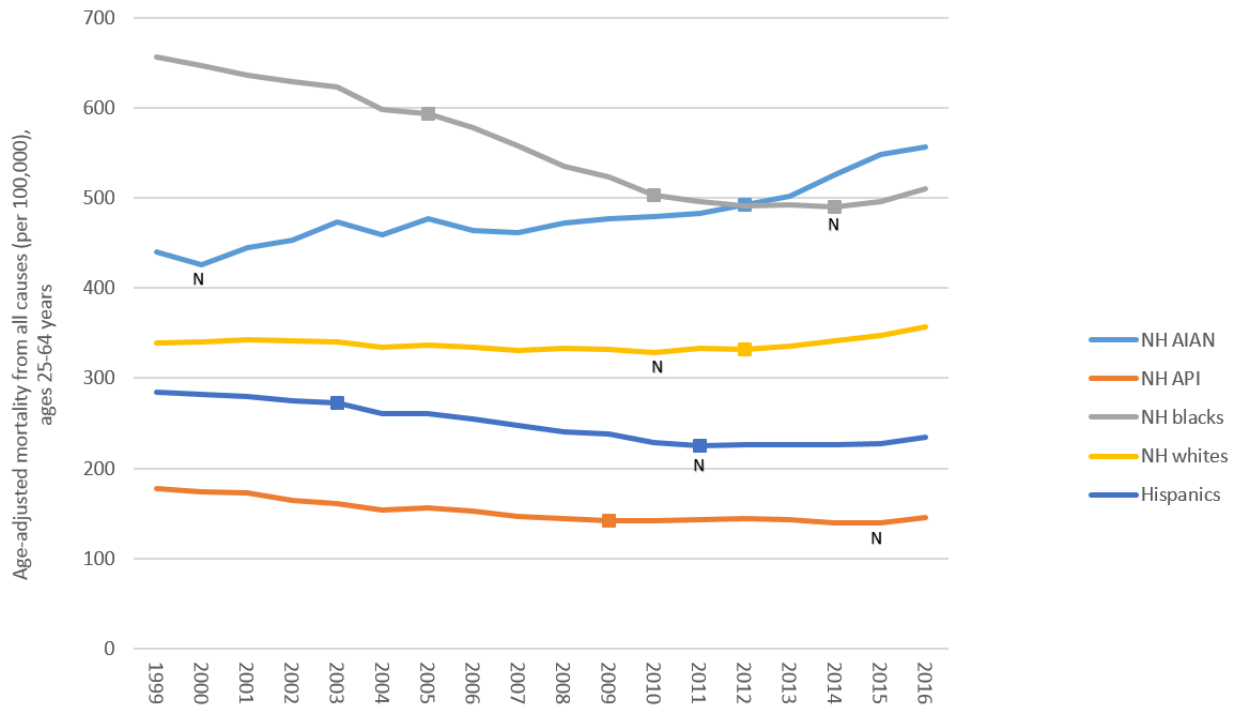

Notes: *AIAN* = Non-Hispanic American Indians and Alaskan Natives, *API* = NH Asians and Pacific Islanders, *N* = nadir (all-cause mortality rate significantly less than that of 2016), *NH* = Non-Hispanic. Square symbols (□) denote *joinpoints*, points of inflection when mortality trend lines (not shown) changed significantly ( $p < 0.05$ ). The trend lines, plotted by Joinpoint Regression Software, are displayed in the Jointpoint Chartbook later in this supplement.

**Figure S2. Age-adjusted mortality from external causes (V01-Y89), US adults ages 25-64 years, 1999-2016, by race-ethnicity**

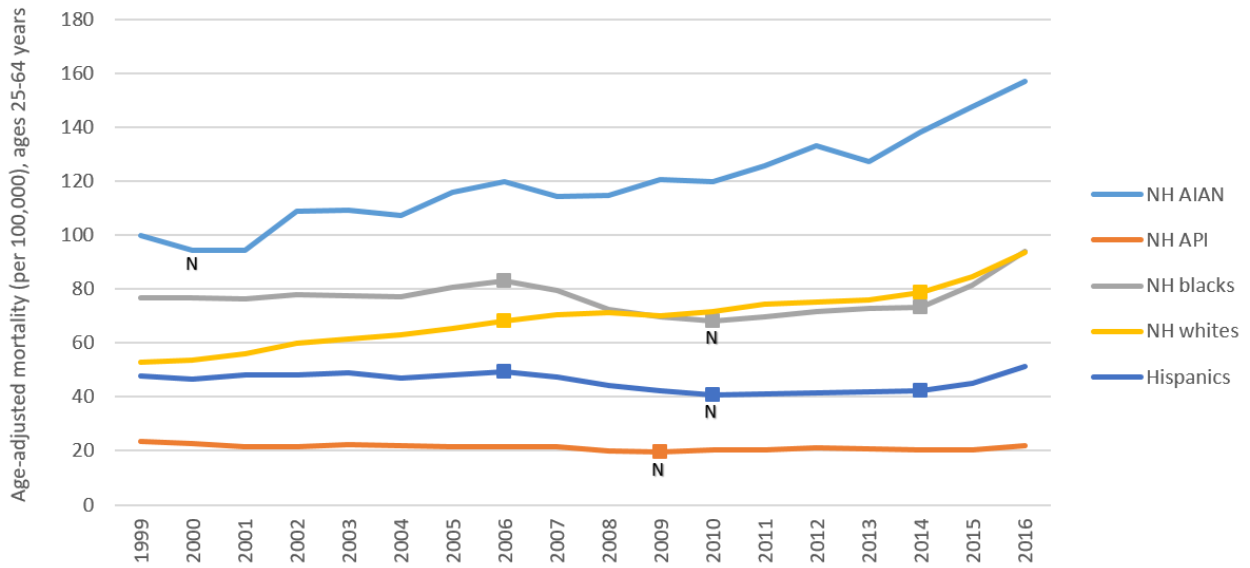

Notes: *AIAN* = Non-Hispanic American Indians and Alaskan Natives, *API* = NH Asians and Pacific Islanders, *N* = nadir (all-cause mortality rate significantly less than that of 2016), *NH* = Non-Hispanic. Square symbols (□) denote *joinpoints*, points of inflection when mortality trend lines (not shown) changed significantly ( $p < 0.05$ ). The trend lines, plotted by Joinpoint Regression Software, are displayed in the Jointpoint Chartbook later in this supplement.

**Figure S3. Age-adjusted mortality from diseases of the circulatory system (I00-I99), US adults ages 25-64 years, 1999-2016, by race-ethnicity**

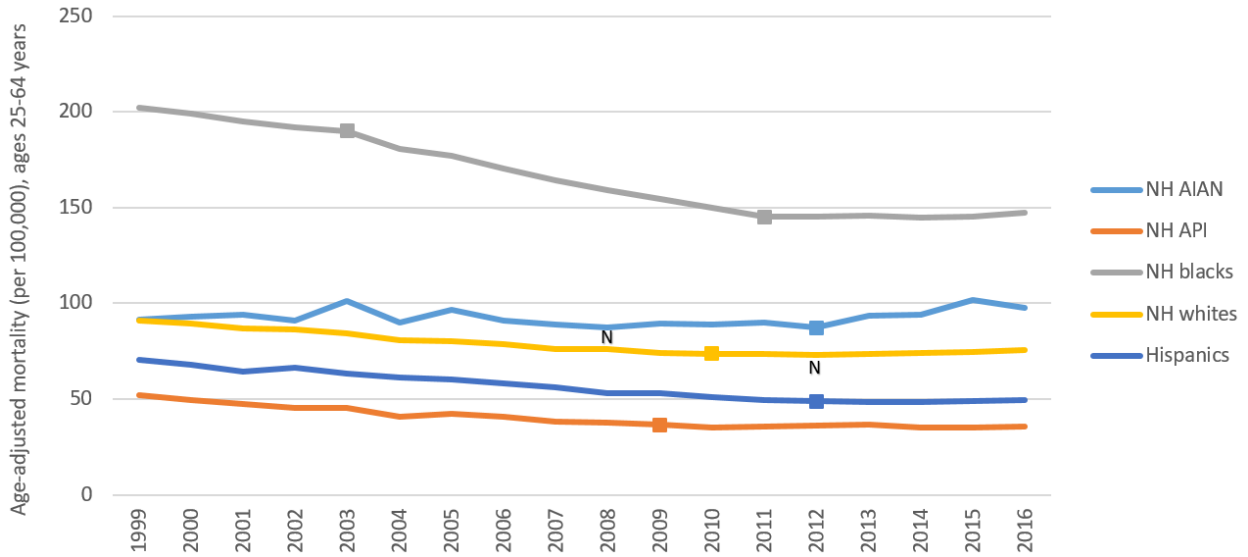

Notes: *AIAN* = Non-Hispanic American Indians and Alaskan Natives, *API* = NH Asians and Pacific Islanders, *N* = nadir (all-cause mortality rate significantly less than that of 2016), *NH* = Non-Hispanic. Square symbols (□) denote *joinpoints*, points of inflection when mortality trend lines (not shown) changed significantly ( $p < 0.05$ ). The trend lines, plotted by Joinpoint Regression Software, are displayed in the Jointpoint Chartbook later in this supplement.

**Figure S4. Age-adjusted mortality from diseases of the digestive system (K00-K92), US adults ages 25-64 years, 1999-2016, by race-ethnicity**

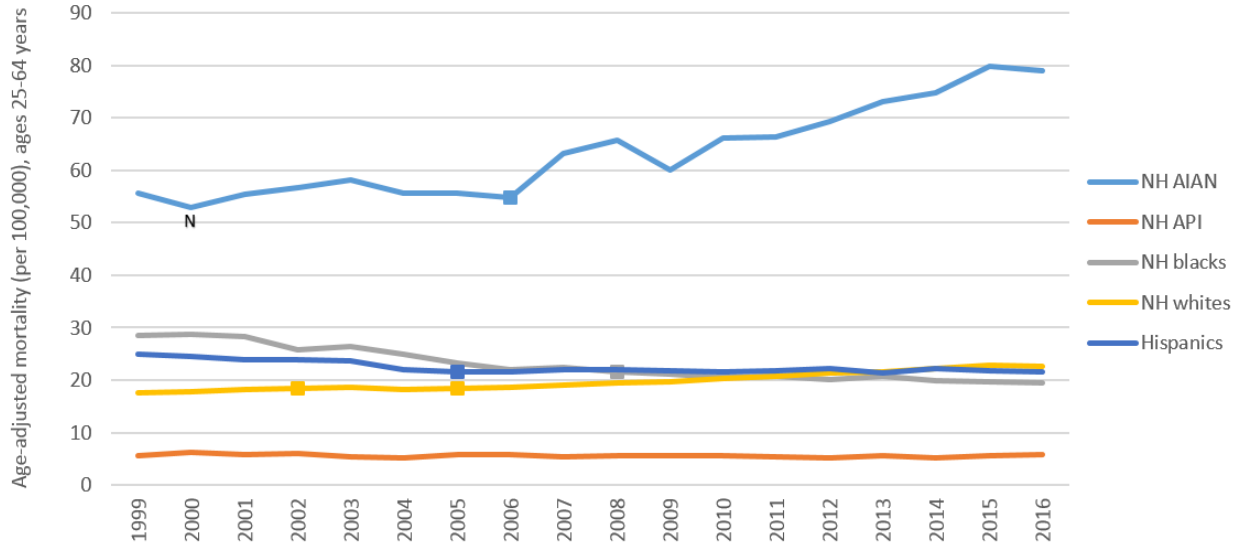

Notes: *AIAN* = Non-Hispanic American Indians and Alaskan Natives, *API* = NH Asians and Pacific Islanders, *N* = nadir (all-cause mortality rate significantly less than that of 2016), *NH* = Non-Hispanic. Square symbols (□) denote *joinpoints*, points of inflection when mortality trend lines (not shown) changed significantly ( $p < 0.05$ ). The trend lines, plotted by Joinpoint Regression Software, are displayed in the Jointpoint Chartbook later in this supplement.

**Figure S5. Age-adjusted mortality from diseases of the respiratory system (J00-J98), US adults ages 25-64 years, 1999-2016, by race-ethnicity**

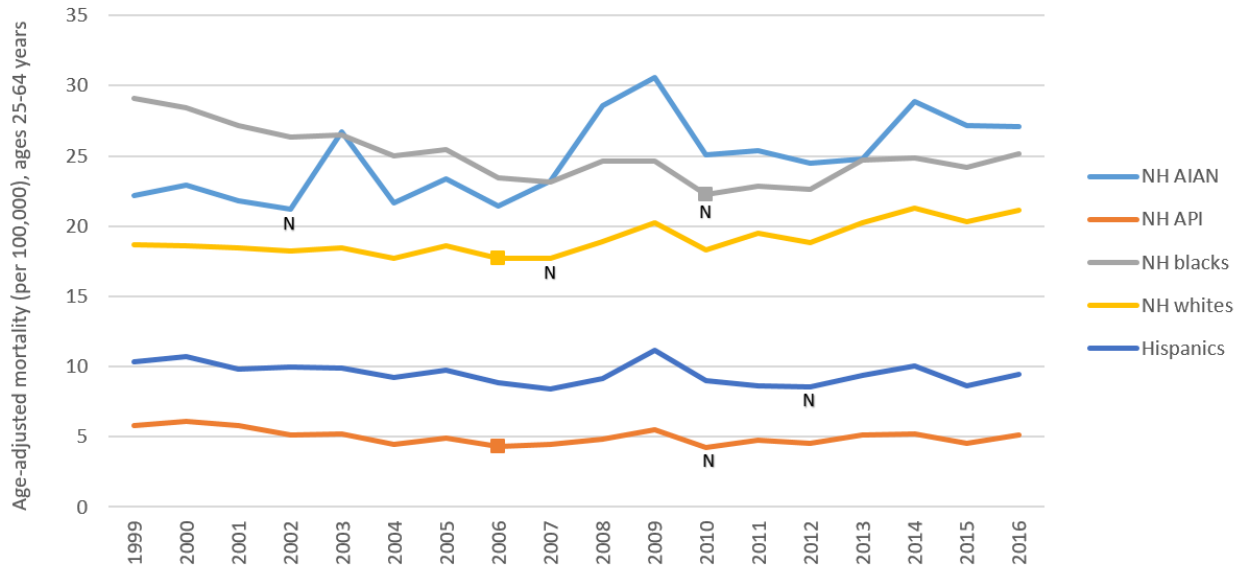

Notes: *AIAN* = Non-Hispanic American Indians and Alaskan Natives, *API* = NH Asians and Pacific Islanders, *N* = nadir (all-cause mortality rate significantly less than that of 2016), *NH* = Non-Hispanic. Square symbols (□) denote *joinpoints*, points of inflection when mortality trend lines (not shown) changed significantly ( $p < 0.05$ ). The trend lines, plotted by Joinpoint Regression Software, are displayed in the Jointpoint Chartbook later in this supplement.

**Figure S6. Age-adjusted mortality from endocrine, nutritional and metabolic diseases (E00-E88), US adults ages 25-64 years, 1999-2016, by race-ethnicity**

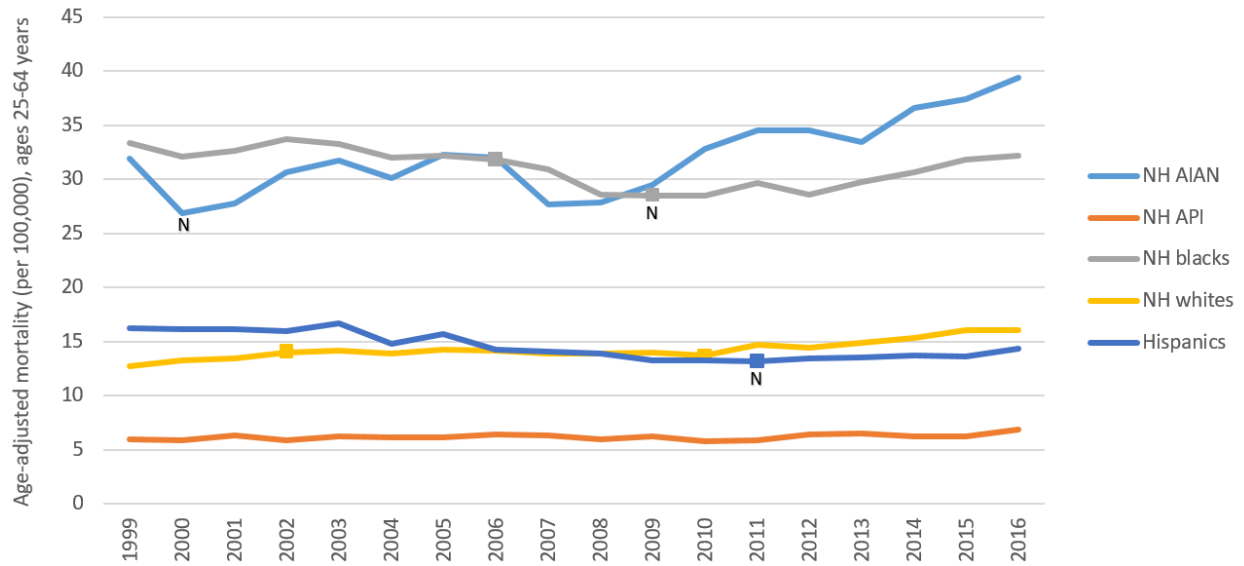

Notes: *AIAN* = Non-Hispanic American Indians and Alaskan Natives, *API* = NH Asians and Pacific Islanders, *N* = nadir (all-cause mortality rate significantly less than that of 2016), *NH* = Non-Hispanic. Square symbols (□) denote *joinpoints*, points of inflection when mortality trend lines (not shown) changed significantly ( $p < 0.05$ ). The trend lines, plotted by Joinpoint Regression Software, are displayed in the Jointpoint Chartbook later in this supplement.

**Figure S7. Age-adjusted mortality from diseases of the nervous system (G00-G98), US adults ages 25-64 years, 1999-2016, by race-ethnicity**

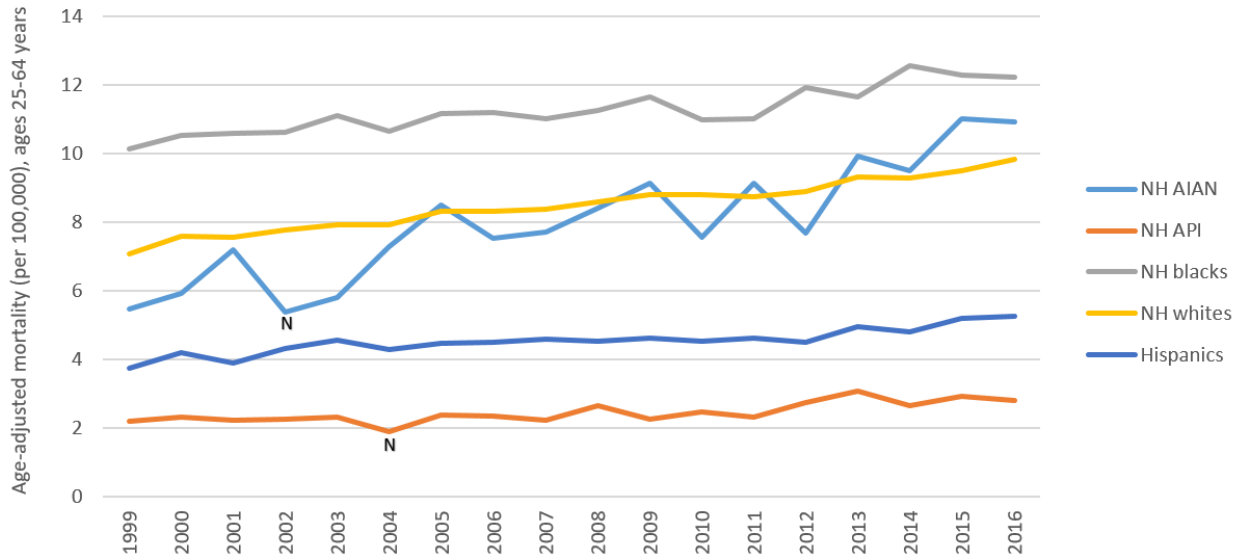

Notes: *AIAN* = Non-Hispanic American Indians and Alaskan Natives, *API* = NH Asians and Pacific Islanders, *N* = nadir (all-cause mortality rate significantly less than that of 2016), *NH* = Non-Hispanic. Square symbols (□) denote *joinpoints*, points of inflection when mortality trend lines (not shown) changed significantly ( $p < 0.05$ ). The trend lines, plotted by Joinpoint Regression Software, are displayed in the Jointpoint Chartbook later in this supplement.

**Figure S8. Age-adjusted mortality from mental and behavioral disorders (F01-F99), US adults ages 25-64 years, 1999-2016, by race-ethnicity**

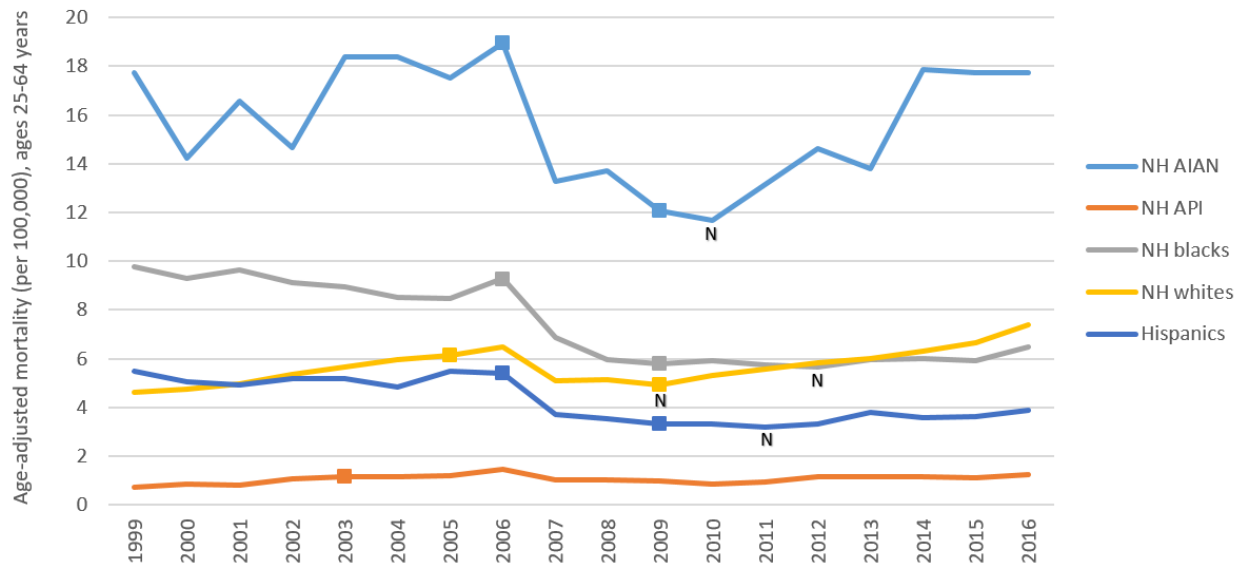

Notes: *AIAN* = Non-Hispanic American Indians and Alaskan Natives, *API* = NH Asians and Pacific Islanders, *N* = nadir (all-cause mortality rate significantly less than that of 2016), *NH* = Non-Hispanic. Square symbols (□) denote *joinpoints*, points of inflection when mortality trend lines (not shown) changed significantly ( $p < 0.05$ ). The trend lines, plotted by Joinpoint Regression Software, are displayed in the Jointpoint Chartbook later in this supplement.



**Figure S9. Age-adjusted mortality from diseases of the genitourinary system (N00-N98), US adults ages 25-64 years, 1999-2016, by race-ethnicity**

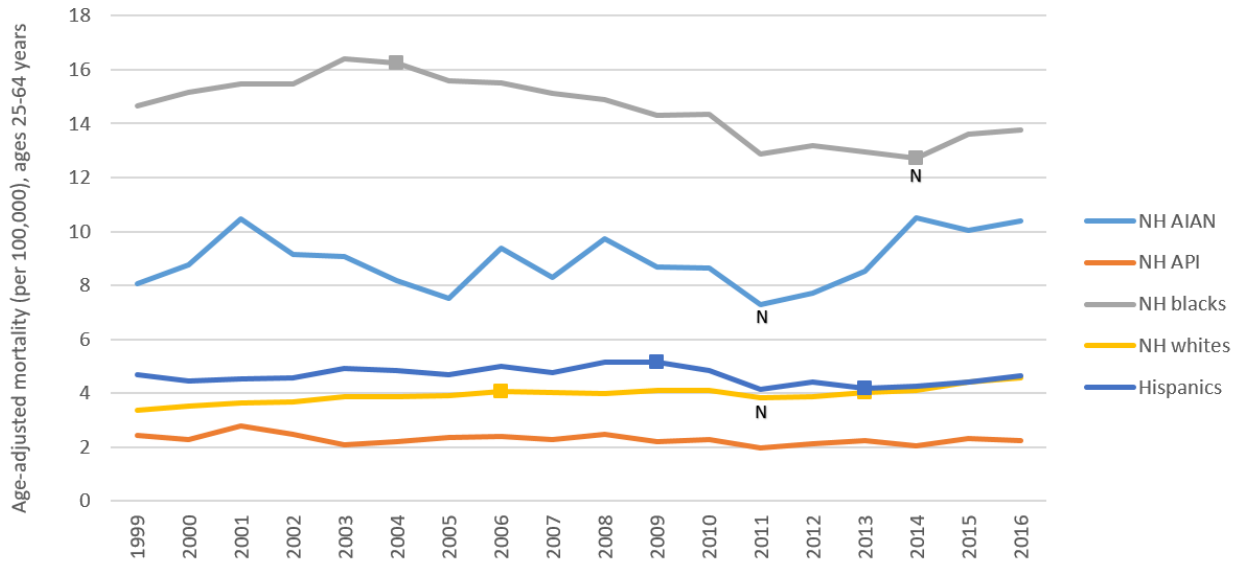

Notes: *AIAN* = Non-Hispanic American Indians and Alaskan Natives, *API* = NH Asians and Pacific Islanders, *N* = nadir (all-cause mortality rate significantly less than that of 2016), *NH* = Non-Hispanic. Square symbols (□) denote *joinpoints*, points of inflection when mortality trend lines (not shown) changed significantly ( $p < 0.05$ ). The trend lines, plotted by Joinpoint Regression Software, are displayed in the Jointpoint Chartbook later in this supplement.

**Figure S10. Age-adjusted mortality from pregnancy, childbirth and the puerperium (O00-O99), US adults ages 25-64 years, 1999-2016, by race-ethnicity**

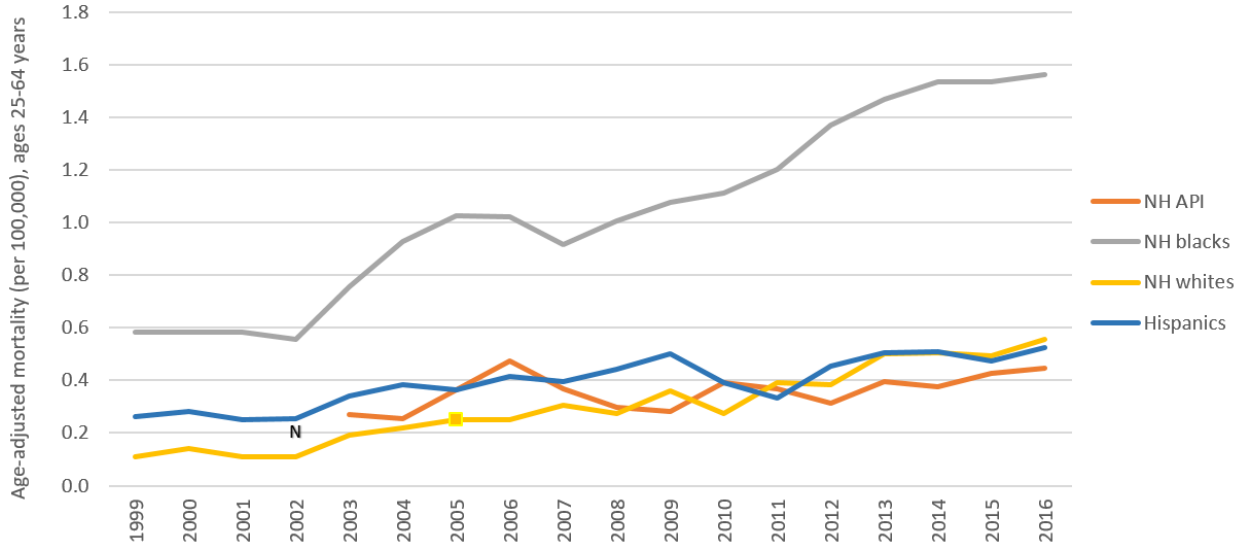

Notes: *API* = NH Asians and Pacific Islanders, *N* = nadir (all-cause mortality rate significantly less than that of 2016), *NH* = Non-Hispanic. Square symbols (□) denote *joinpoints*, points of inflection when mortality trend lines (not shown) changed significantly ( $p < 0.05$ ). Data for NH API were lacking for some years due to insufficient death counts. The trend lines, plotted by Joinpoint Regression Software, are displayed in the Jointpoint Chartbook later in this supplement.

**Figure S11. Age-adjusted mortality from diseases of the blood and immune mechanism (D50-D89), US adults ages 25-64 years, 1999-2016, by race-ethnicity**

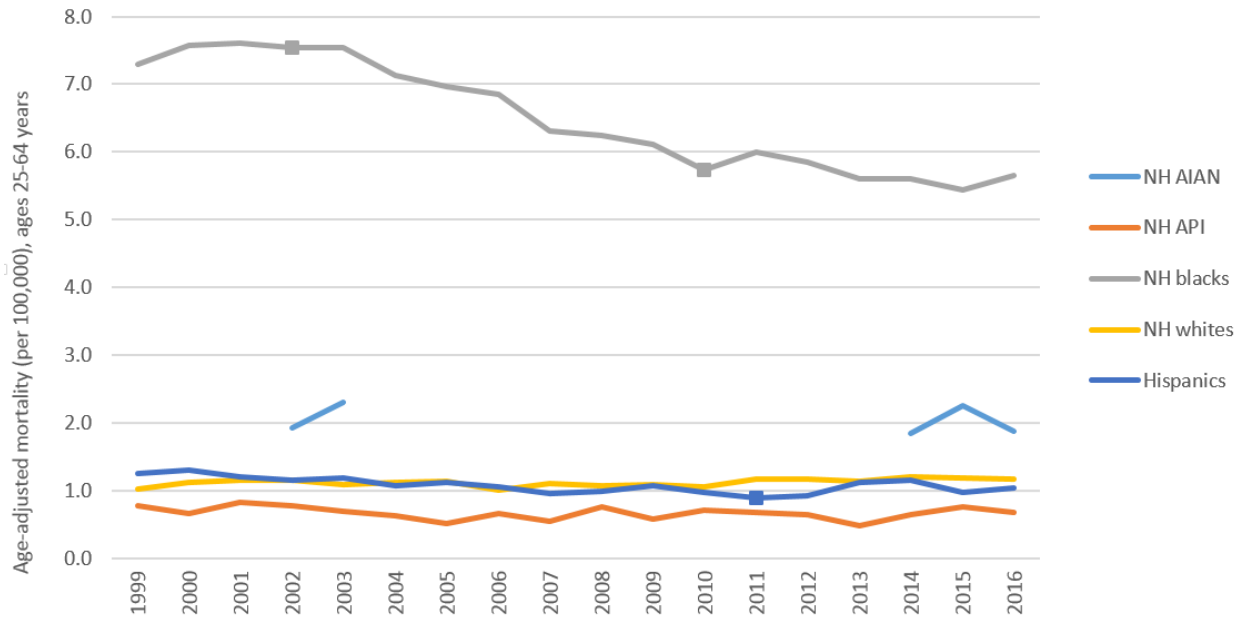

Notes: *AIAN* = Non-Hispanic American Indians and Alaskan Natives, *API* = NH Asians and Pacific Islanders, *NH* = Non-Hispanic. Square symbols (□) denote *joinpoints*, points of inflection when mortality trend lines (not shown) changed significantly ( $p < 0.05$ ). Data for NH AIAN were lacking for some years due to insufficient death counts. The trend lines, plotted by Joinpoint Regression Software, are displayed in the Jointpoint Chartbook later in this supplement.

**Figure S12. Age-adjusted mortality from diseases of the musculoskeletal system and connective tissue (M00-M99), US adults ages 25-64 years, 1999-2016, by race-ethnicity**

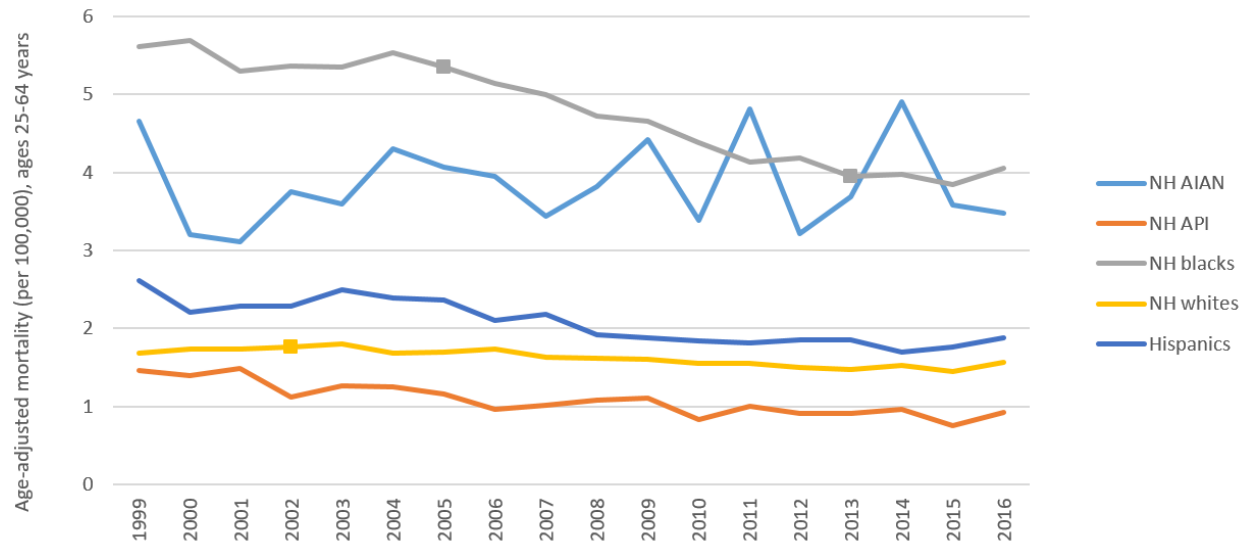

Notes: *AIAN* = Non-Hispanic American Indians and Alaskan Natives, *API* = NH Asians and Pacific Islanders, *NH* = Non-Hispanic. Square symbols (□) denote *joinpoints*, points of inflection when mortality trend lines (not shown) changed significantly ( $p < 0.05$ ). The trend lines, plotted by Joinpoint Regression Software, are displayed in the Jointpoint Chartbook later in this supplement.

**Figure S13. Age-adjusted mortality from congenital malformations, deformations and chromosomal abnormalities (Q00-Q99), US adults ages 25-64 years, 1999-2016, by race-ethnicity**

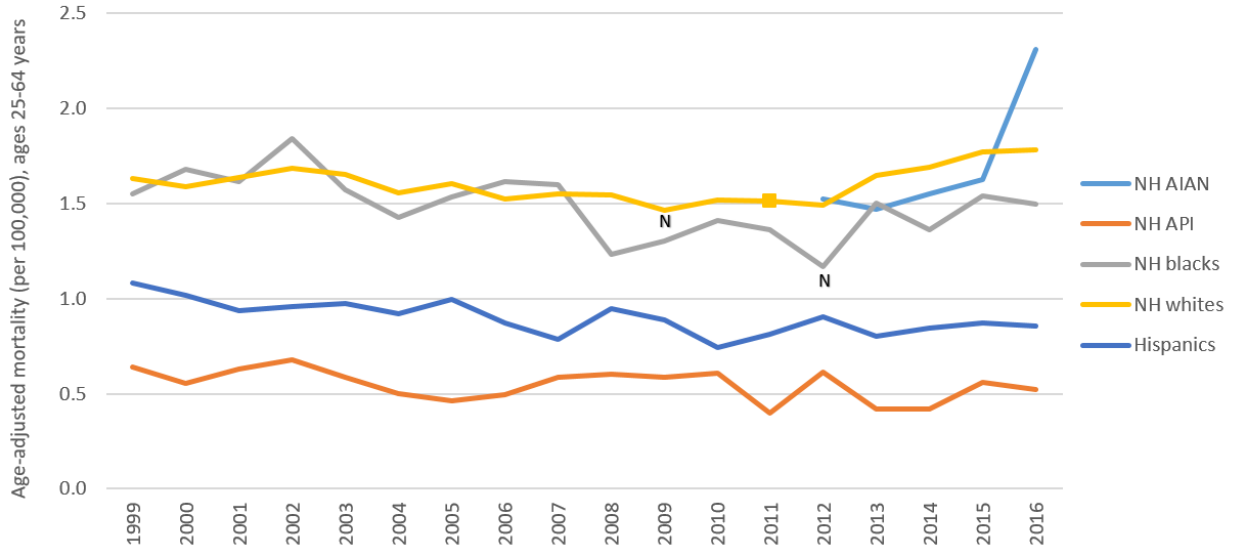

Notes: *AIAN* = Non-Hispanic American Indians and Alaskan Natives, *API* = NH Asians and Pacific Islanders, *N* = nadir (all-cause mortality rate significantly less than that of 2016), *NH* = Non-Hispanic. Square symbols (□) denote *joinpoints*, points of inflection when mortality trend lines (not shown) changed significantly ( $p < 0.05$ ). Data for NH AIAN were lacking for some years due to insufficient death counts. The trend lines, plotted by Joinpoint Regression Software, are displayed in the Jointpoint Chartbook later in this supplement.

**Figure S14. Age-adjusted mortality from infectious and parasitic diseases (A00-B99), US adults ages 25-64 years, 1999-2016, by race-ethnicity**

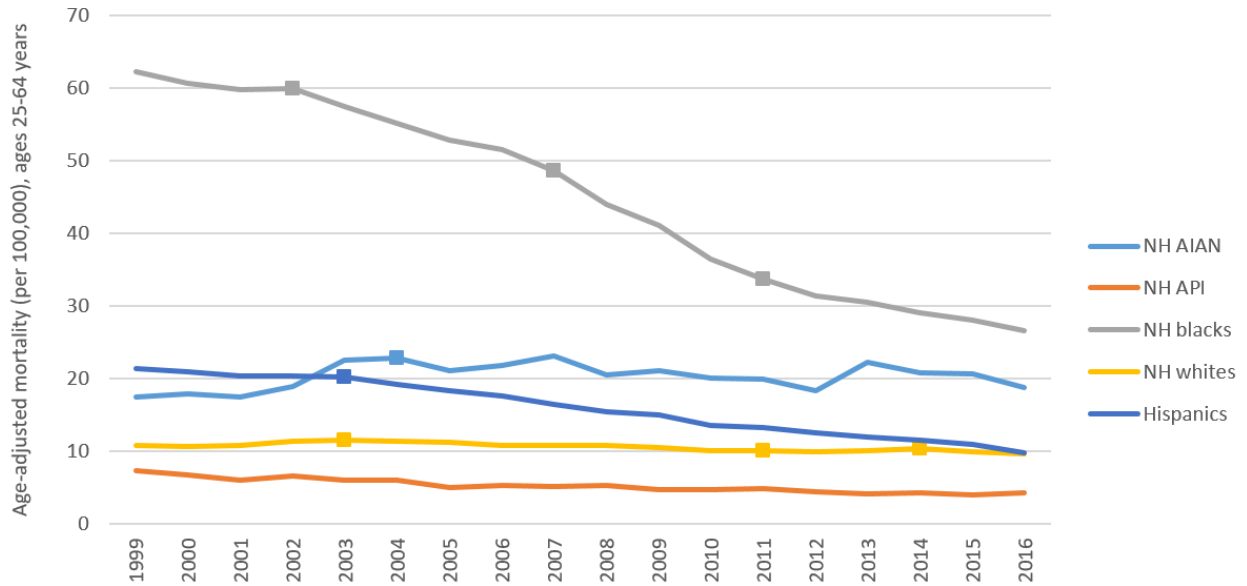

Notes: *AIAN* = Non-Hispanic American Indians and Alaskan Natives, *API* = NH Asians and Pacific Islanders, *NH* = Non-Hispanic. Square symbols (□) denote *joinpoints*, points of inflection when mortality trend lines (not shown) changed significantly ( $p < 0.05$ ). The trend lines, plotted by Joinpoint Regression Software, are displayed in the Jointpoint Chartbook later in this supplement.

**Figure S15. Age-adjusted mortality from neoplasms (C00-D48), US adults ages 25-64 years, 1999-2016, by race-ethnicity**

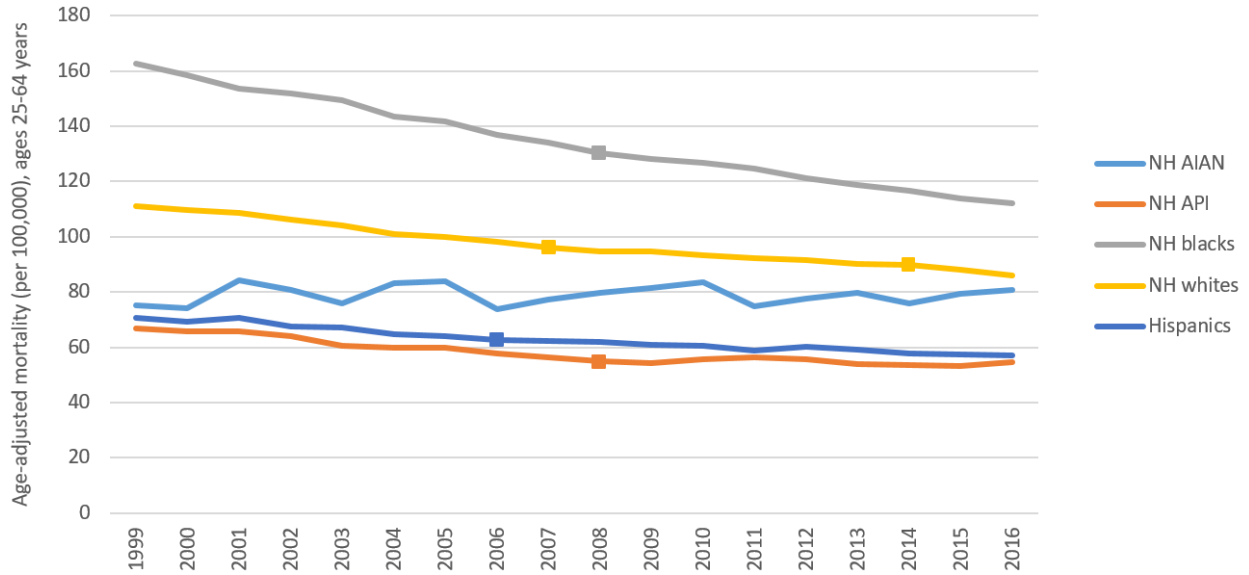

Notes: *AIAN* = Non-Hispanic American Indians and Alaskan Natives, *API* = NH Asians and Pacific Islanders, *NH* = Non-Hispanic. Square symbols (□) denote *joinpoints*, points of inflection when mortality trend lines (not shown) changed significantly ( $p < 0.05$ ). The trend lines, plotted by Joinpoint Regression Software, are displayed in the Jointpoint Chartbook later in this supplement.

**Figure S16. Age-adjusted mortality from diseases of the skin and subcutaneous tissue (L00-L98), US adults ages 25-64 years, 1999-2016, by race-ethnicity**

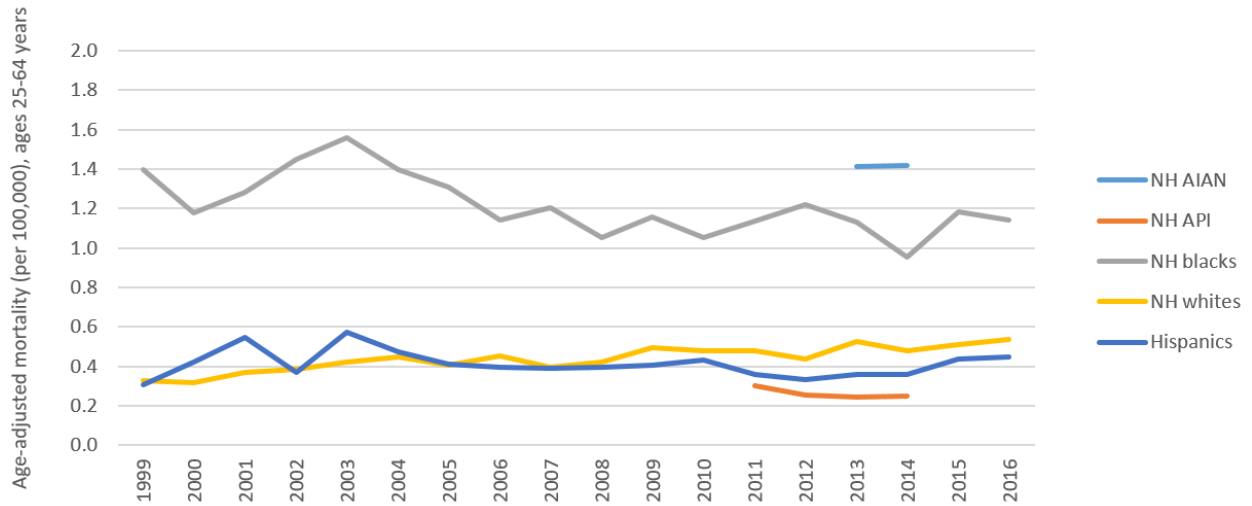

Notes: *AIAN* = Non-Hispanic American Indians and Alaskan Natives, *API* = NH Asians and Pacific Islanders, *NH* = Non-Hispanic. Data for NH AIAN and API were lacking for some years due to insufficient death counts. The trend lines, plotted by Joinpoint Regression Software, are displayed in the Jointpoint Chartbook later in this supplement.



**Figure S17. Age-adjusted mortality from symptoms, signs, and abnormal clinical and laboratory findings, not elsewhere classified (R00-R99), US adults ages 25-64 years, 1999-2016, by race-ethnicity**

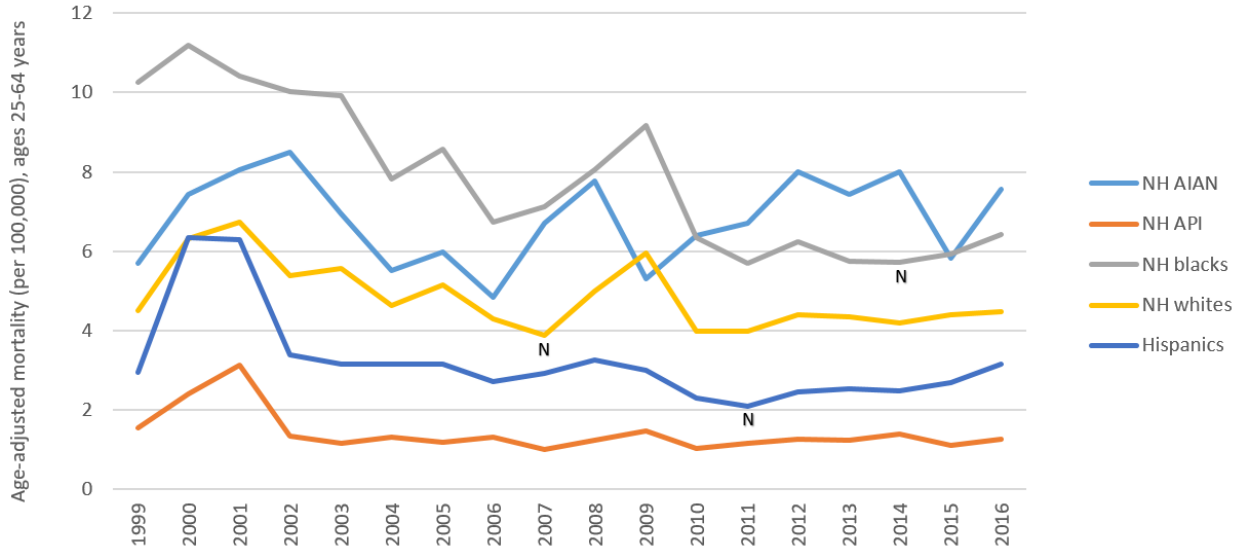

Notes: *AIAN* = Non-Hispanic American Indians and Alaskan Natives, *API* = NH Asians and Pacific Islanders, *N* = nadir (all-cause mortality rate significantly less than that of 2016), *NH* = Non-Hispanic. The trend lines, plotted by Joinpoint Regression Software, are displayed in the Jointpoint Chartbook later in this supplement.

**Figure S18. Age-adjusted mortality from accidental drug overdoses (X40-X44), US adults ages 25-64 years, 1999-2016, by race-ethnicity**

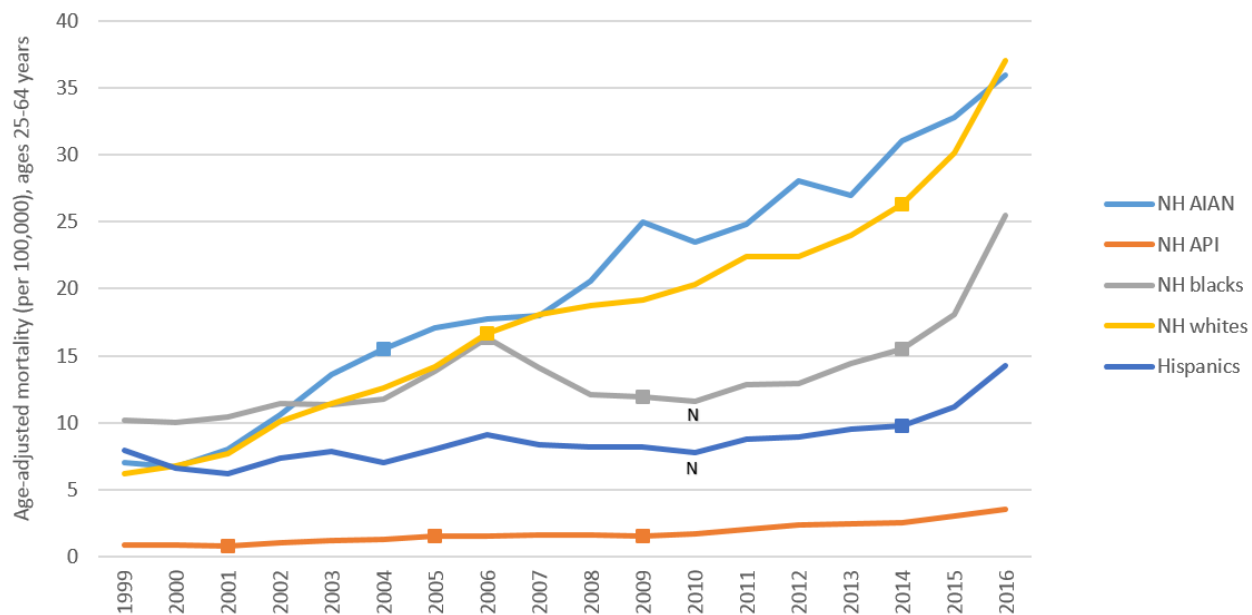

Notes: *AIAN* = Non-Hispanic American Indians and Alaskan Natives, *API* = NH Asians and Pacific Islanders, *N* = nadir (all-cause mortality rate significantly less than that of 2016), *NH* = Non-Hispanic. The trend lines, plotted by Joinpoint Regression Software, are displayed in the Jointpoint Chartbook later in this supplement.

**Figure S19. Age-adjusted mortality from suicides (X60-X84), US adults ages 25-64 years, 1999-2016, by race-ethnicity**

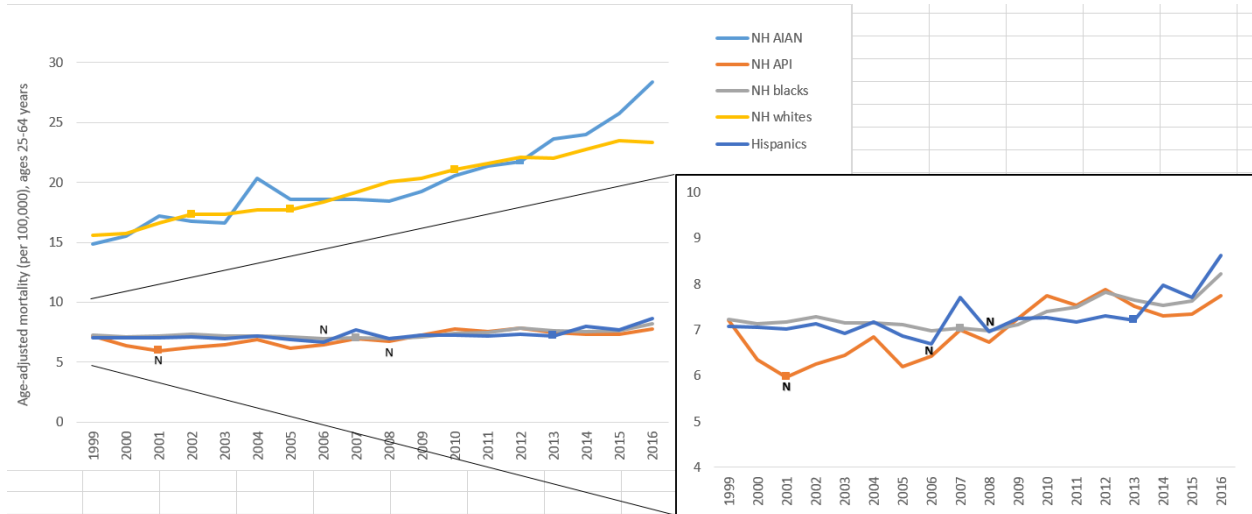

Notes: *AIAN* = Non-Hispanic American Indians and Alaskan Natives, *API* = NH Asians and Pacific Islanders, *N* = nadir (all-cause mortality rate significantly less than that of 2016), *NH* = Non-Hispanic. The trend lines, plotted by Joinpoint Regression Software, are displayed in the Jointpoint Chartbook later in this supplement.

**Figure S20. Age-adjusted mortality from alcoholic liver disease (K70), US adults ages 25-64 years, 1999-2016, by race-ethnicity**

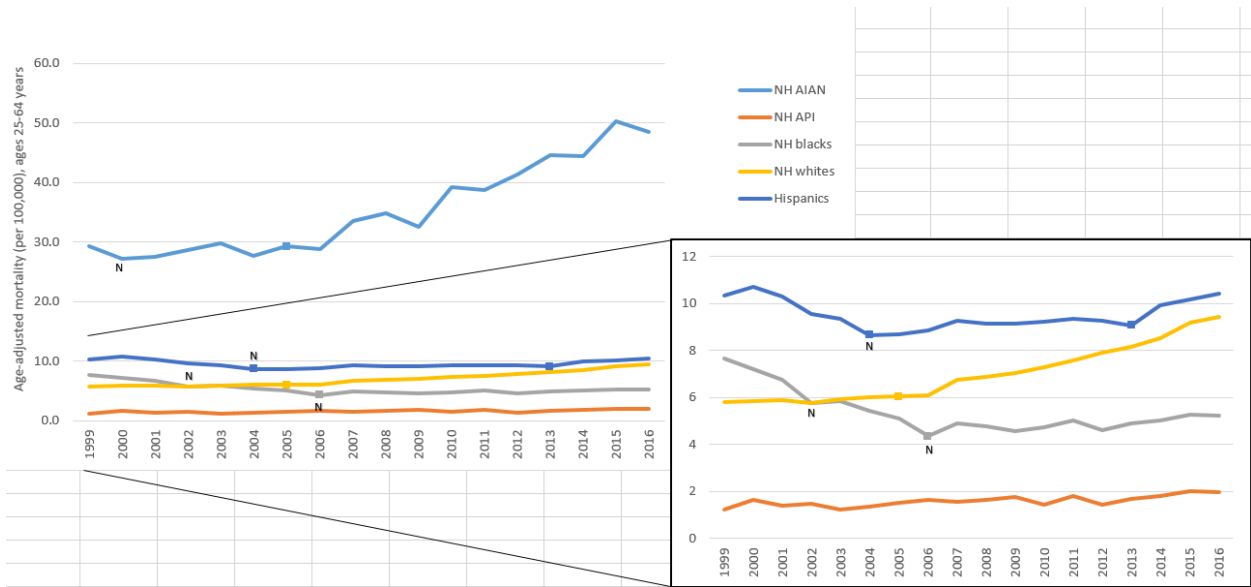

Notes: *AIAN* = Non-Hispanic American Indians and Alaskan Natives, *API* = NH Asians and Pacific Islanders, *N* = nadir (all-cause mortality rate significantly less than that of 2016), *NH* = Non-Hispanic. The trend lines, plotted by Joinpoint Regression Software, are displayed in the Jointpoint Chartbook later in this supplement.

**Figure S21. Age-adjusted mortality from hypertensive diseases (I10-I15), US adults ages 25-64 years, 1999-2016, by race-ethnicity**

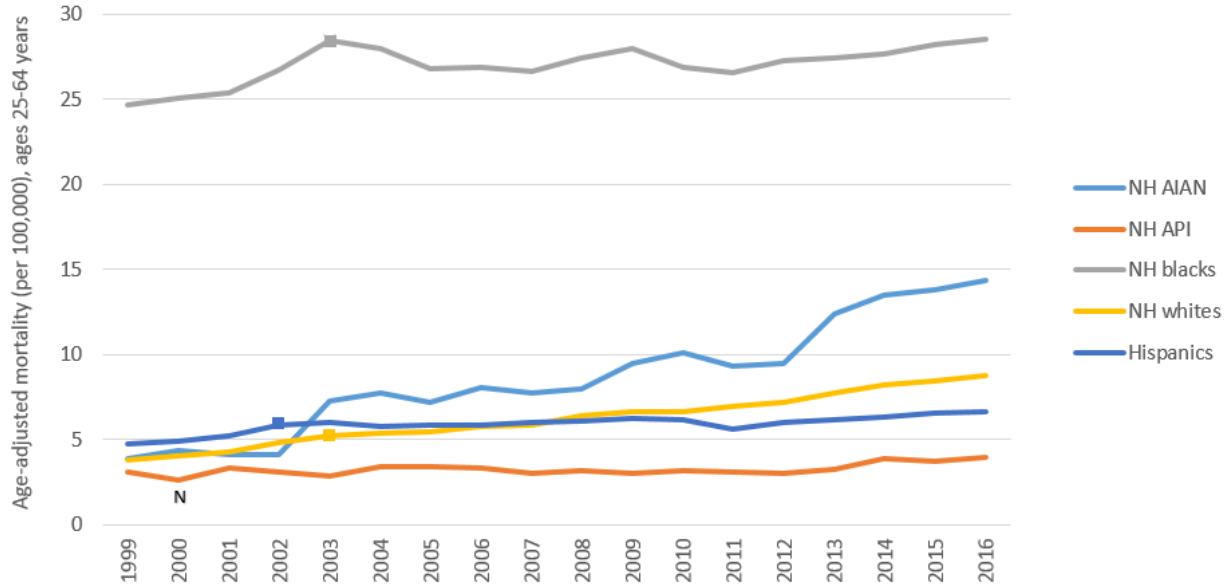

Notes: *AIAN* = Non-Hispanic American Indians and Alaskan Natives, *API* = NH Asians and Pacific Islanders, *N* = nadir (all-cause mortality rate significantly less than that of 2016), *NH* = Non-Hispanic. The trend lines, plotted by Joinpoint Regression Software, are displayed in the Jointpoint Chartbook later in this supplement.

**Figure S22. Age-adjusted mortality from malignant neoplasm of liver and intrahepatic bile ducts (C22), US adults ages 25-64 years, 1999-2016, by race-ethnicity**

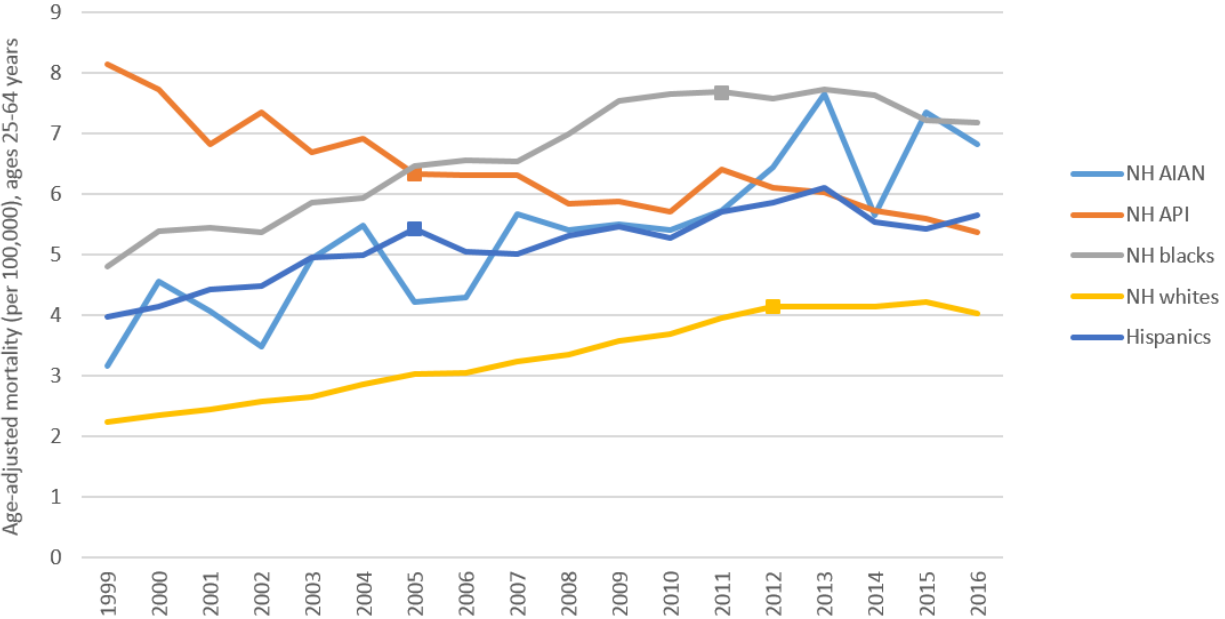

Notes: *AIAN* = Non-Hispanic American Indians and Alaskan Natives, *API* = NH Asians and Pacific Islanders, *N* = nadir (all-cause mortality rate significantly less than that of 2016), *NH* = Non-Hispanic. The trend lines, plotted by Joinpoint Regression Software, are displayed in the Jointpoint Chartbook later in this supplement.

**Figure S23: Diseases of the respiratory system (see Figure S4)**

**Figure S24. Age-adjusted mortality from mental and behavioral disorders involving psychoactive substances (F10-F19), US adults ages 25-64 years, 1999-2016, by race-ethnicity**

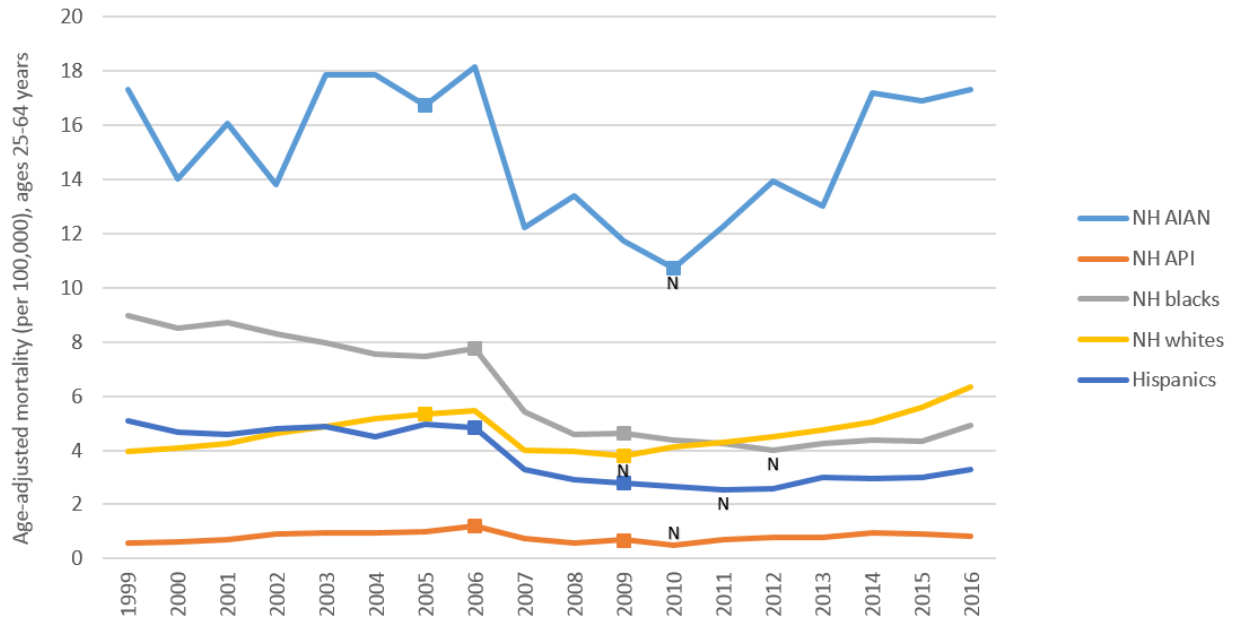

Notes: *AIAN* = Non-Hispanic American Indians and Alaskan Natives, *API* = NH Asians and Pacific Islanders, *N* = nadir (all-cause mortality rate significantly less than that of 2016), *NH* = Non-Hispanic. The trend lines, plotted by Joinpoint Regression Software, are displayed in the Jointpoint Chartbook later in this supplement.



**Figure S25. Age-adjusted mortality from homicides (X85-Y09), US adults ages 25-64 years, 1999-2016, by race-ethnicity**

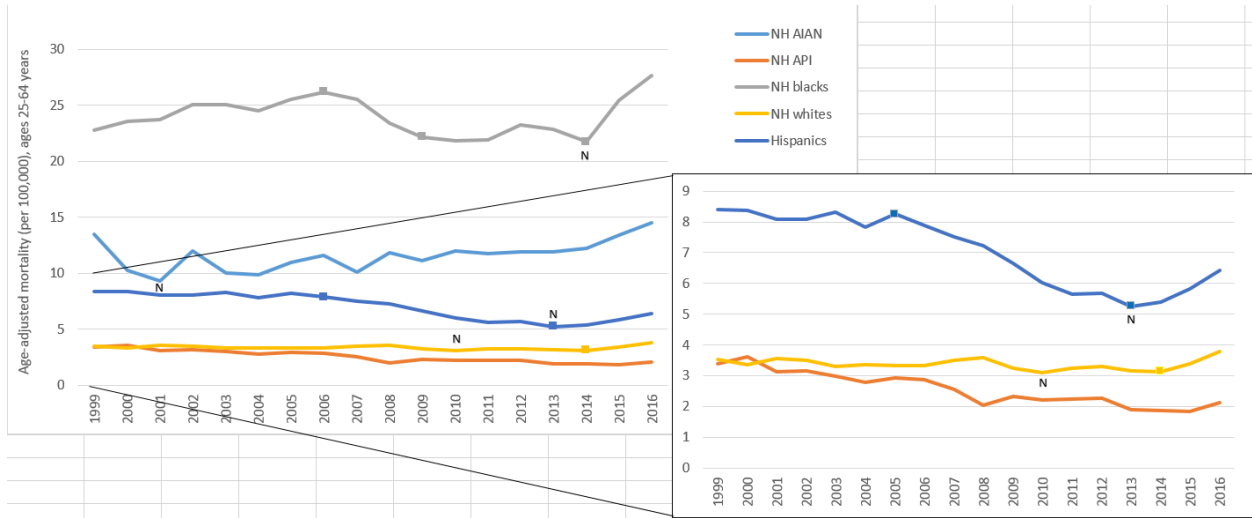

Notes: *AIAN* = Non-Hispanic American Indians and Alaskan Natives, *API* = NH Asians and Pacific Islanders, *N* = nadir (all-cause mortality rate significantly less than that of 2016), *NH* = Non-Hispanic. The trend lines, plotted by Joinpoint Regression Software, are displayed in the Jointpoint Chartbook later in this supplement.

# Joinpoint Chartbook

The following 241 graphs plot mortality trends for 1999-2016 as calculated by the Joinpoint Regression program. Five graphs are presented for each cause of death (except when data were insufficient), with each graph presenting results for a specific racial-ethnic group. The program used the Monte Carlo permutation method to model trend lines that best fit the 17 annual mortality rates (indicated by red dots). The legend (upper right-hand corner) presents the annual percent change (APC) for each interval, or segment. Positive values indicate an increase in mortality, negative values a decrease in mortality. The caret (^) indicates whether the slope (APC) for the segment differed significantly ( $p < 0.05$ ) from zero (i.e., whether the rate increased/decreased during the interval). Green, red, and neutral shading in Tables 1-3 of the main paper are based on these results.

### All-cause mortality (A00-Y89) / NH AIAN: 1 Joinpoint

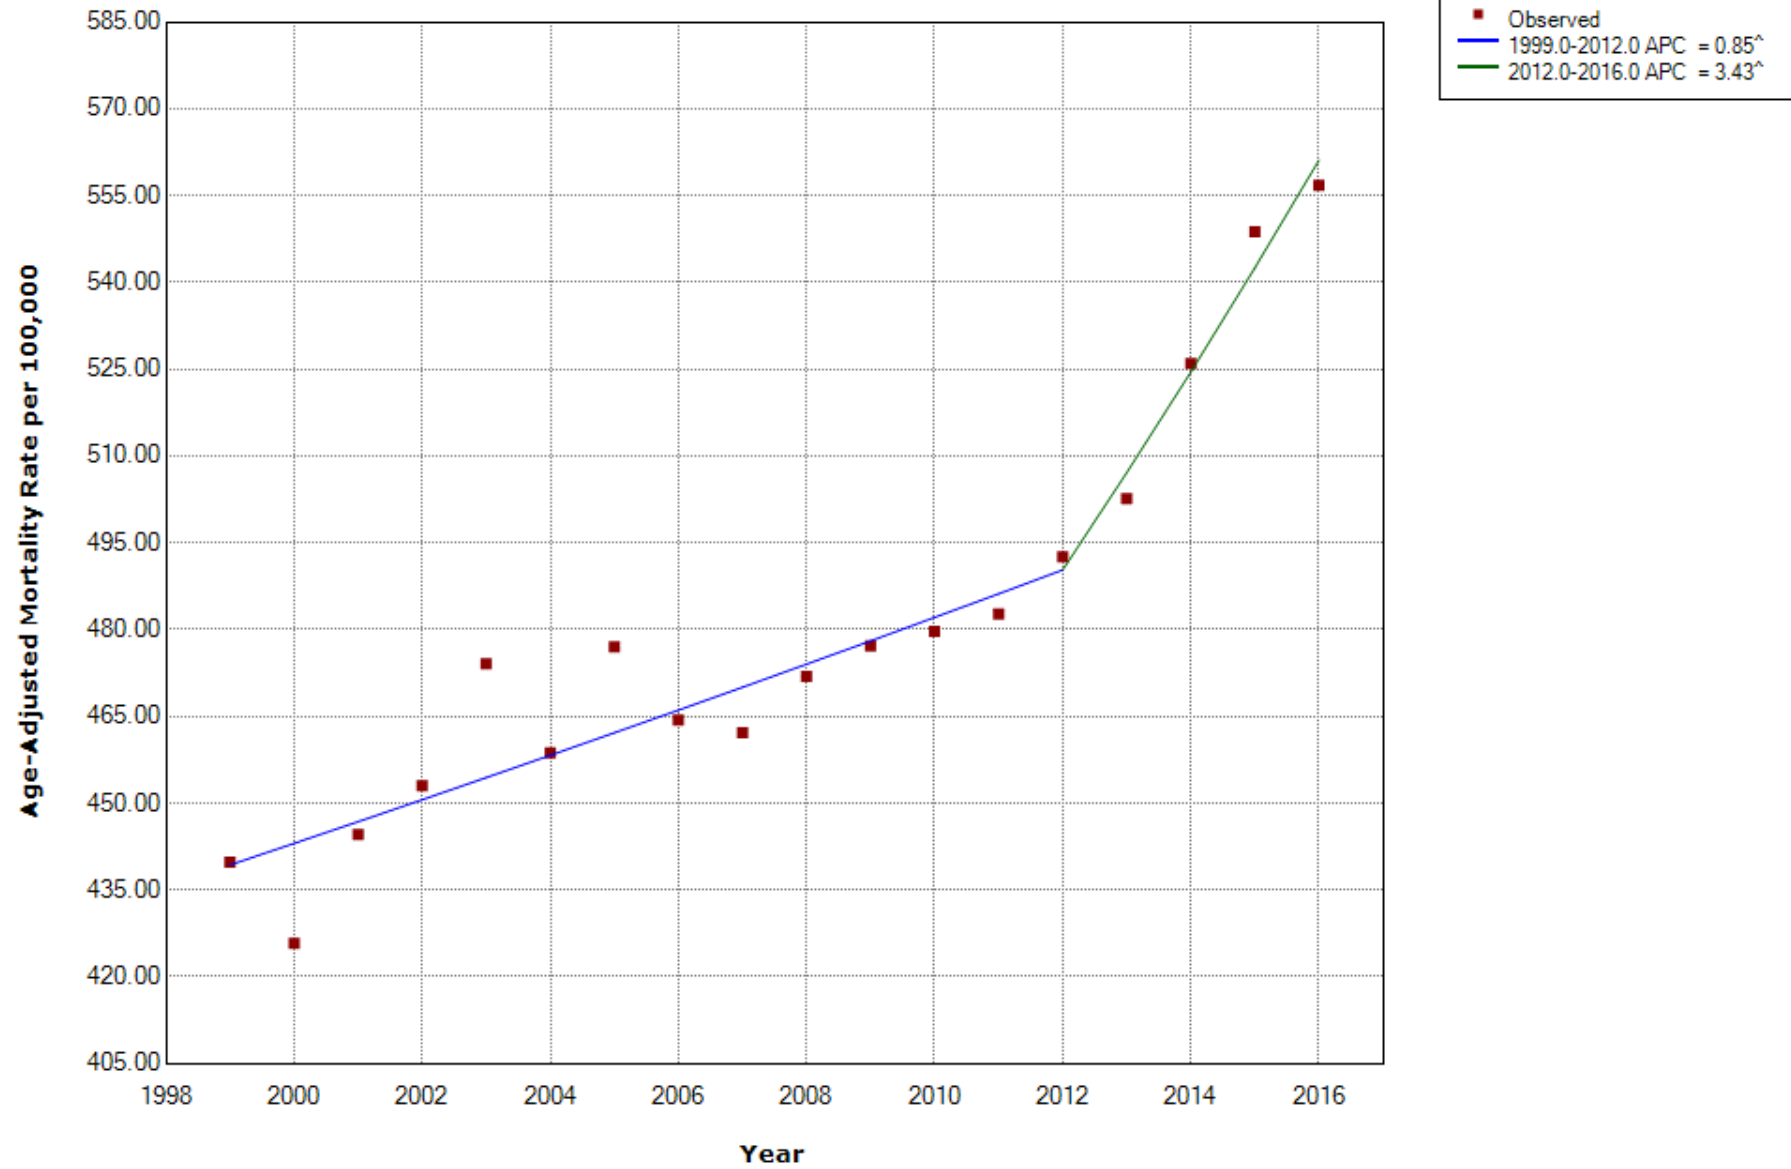

^ Indicates that the Annual Percent Change (APC) is significantly different from zero at the alpha = 0.05 level.  
Final Selected Model: 1 Joinpoint.

### All-cause mortality (A00-Y89) / NH API: 1 Joinpoint

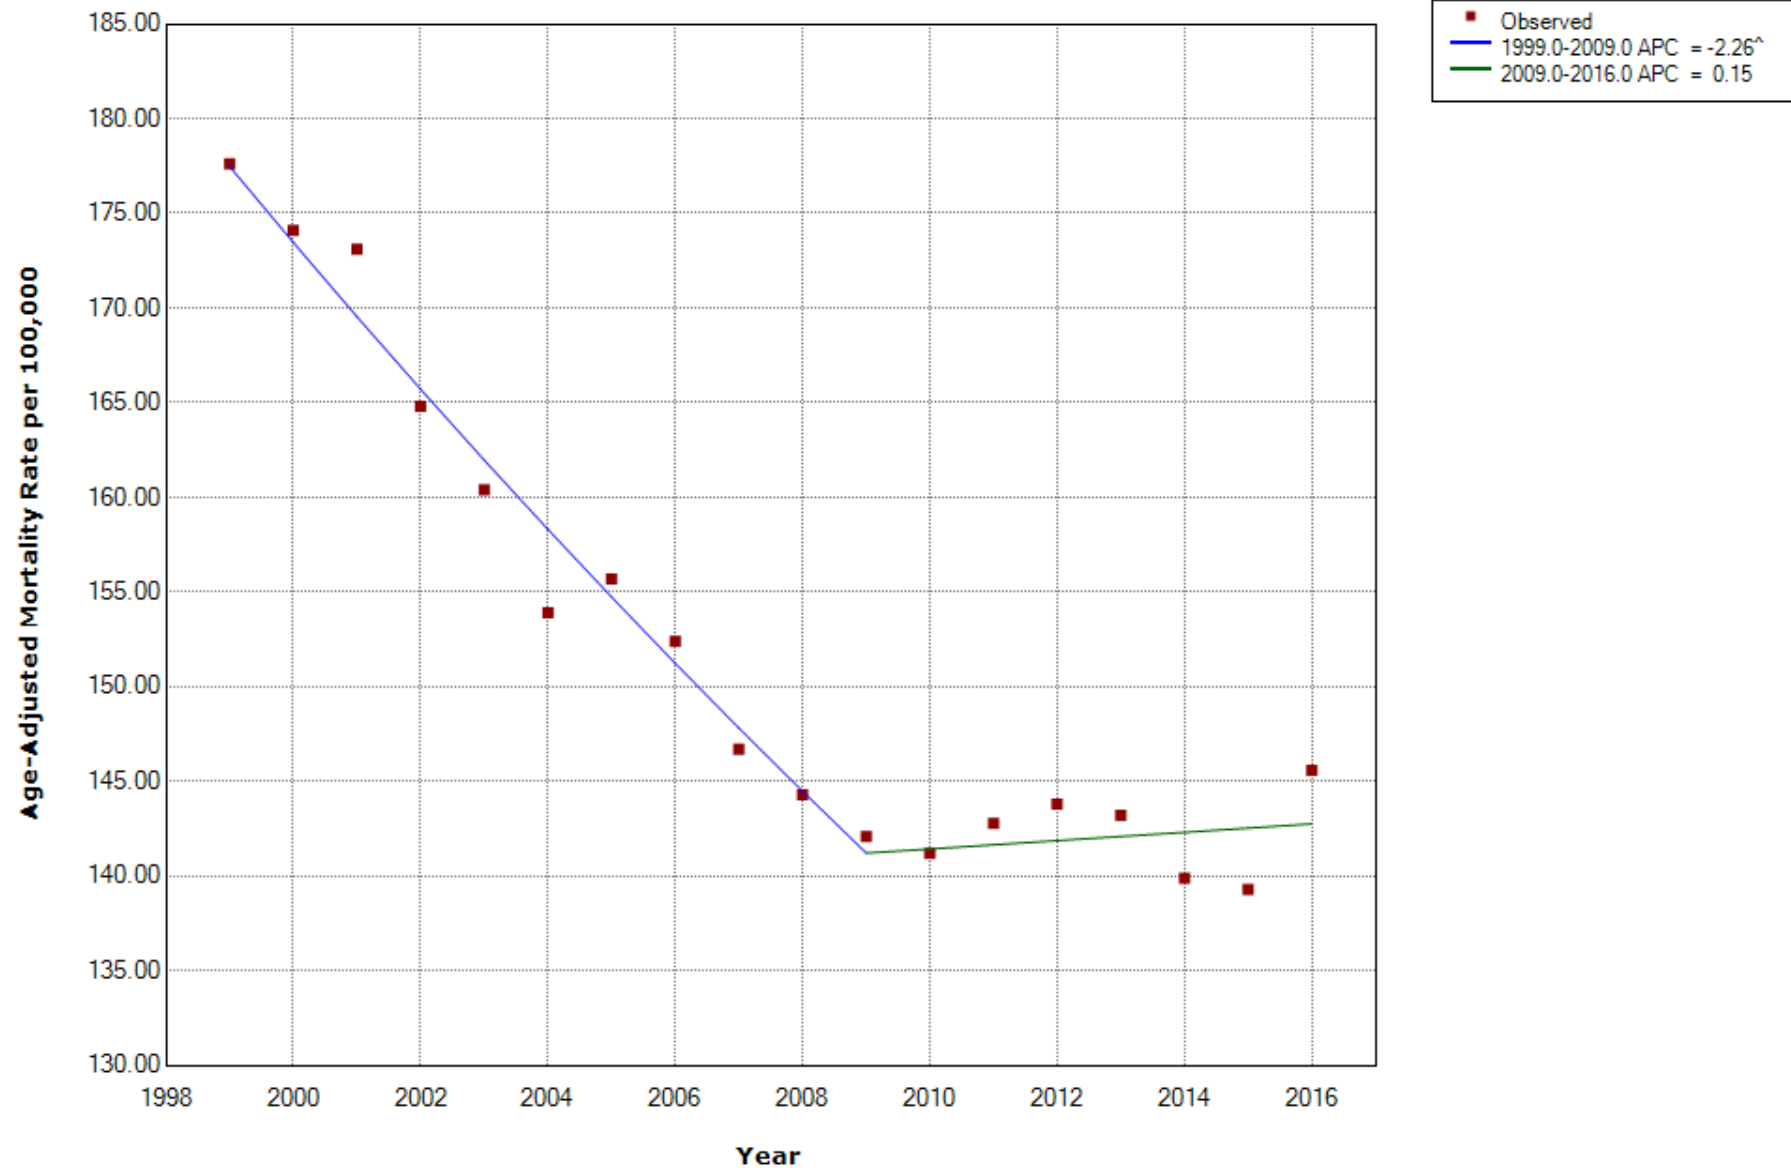

^ Indicates that the Annual Percent Change (APC) is significantly different from zero at the alpha = 0.05 level.  
Final Selected Model: 1 Joinpoint.

### All-cause mortality (A00-Y89) / NH Blacks: 3 Joinpoints

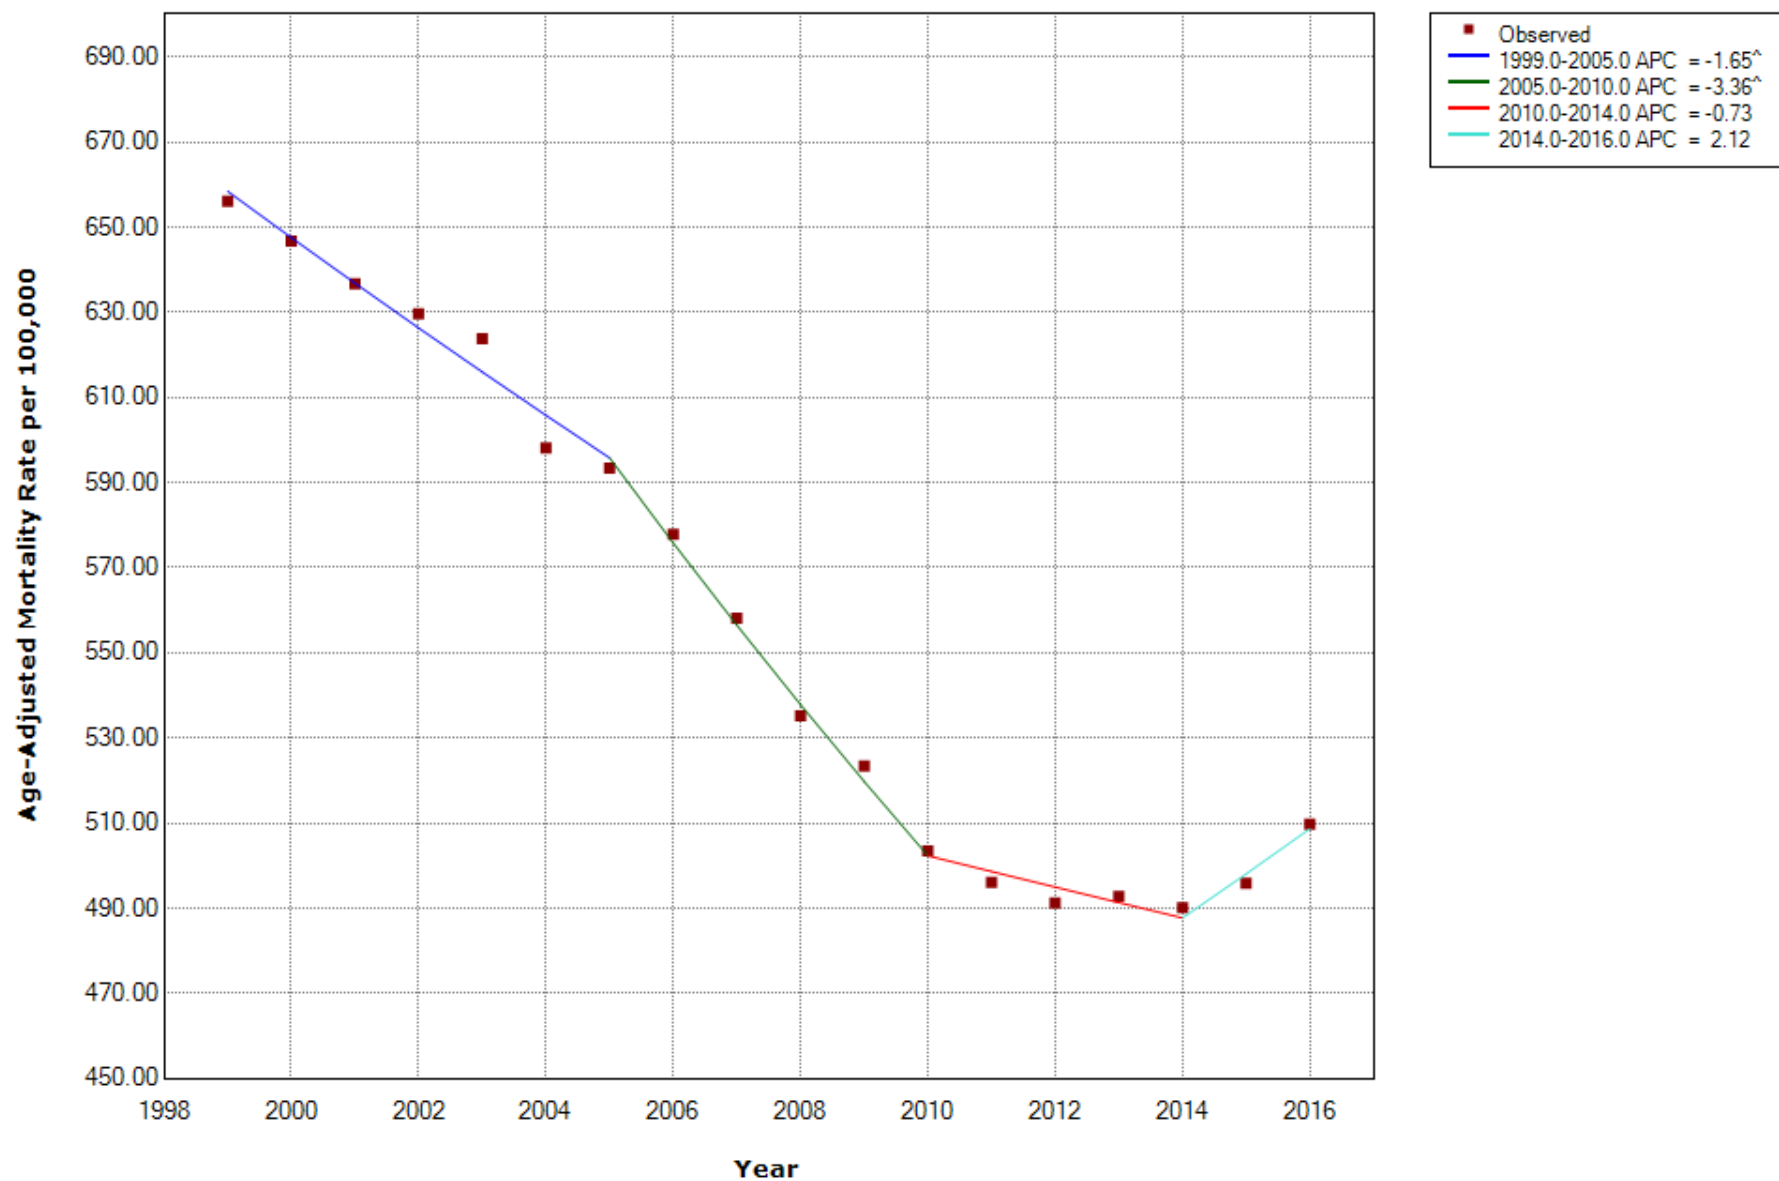

^ Indicates that the Annual Percent Change (APC) is significantly different from zero at the alpha = 0.05 level.  
Final Selected Model: 3 Joinpoints.

### All-cause mortality (A00-Y89) / NH whites: 1 Joinpoint

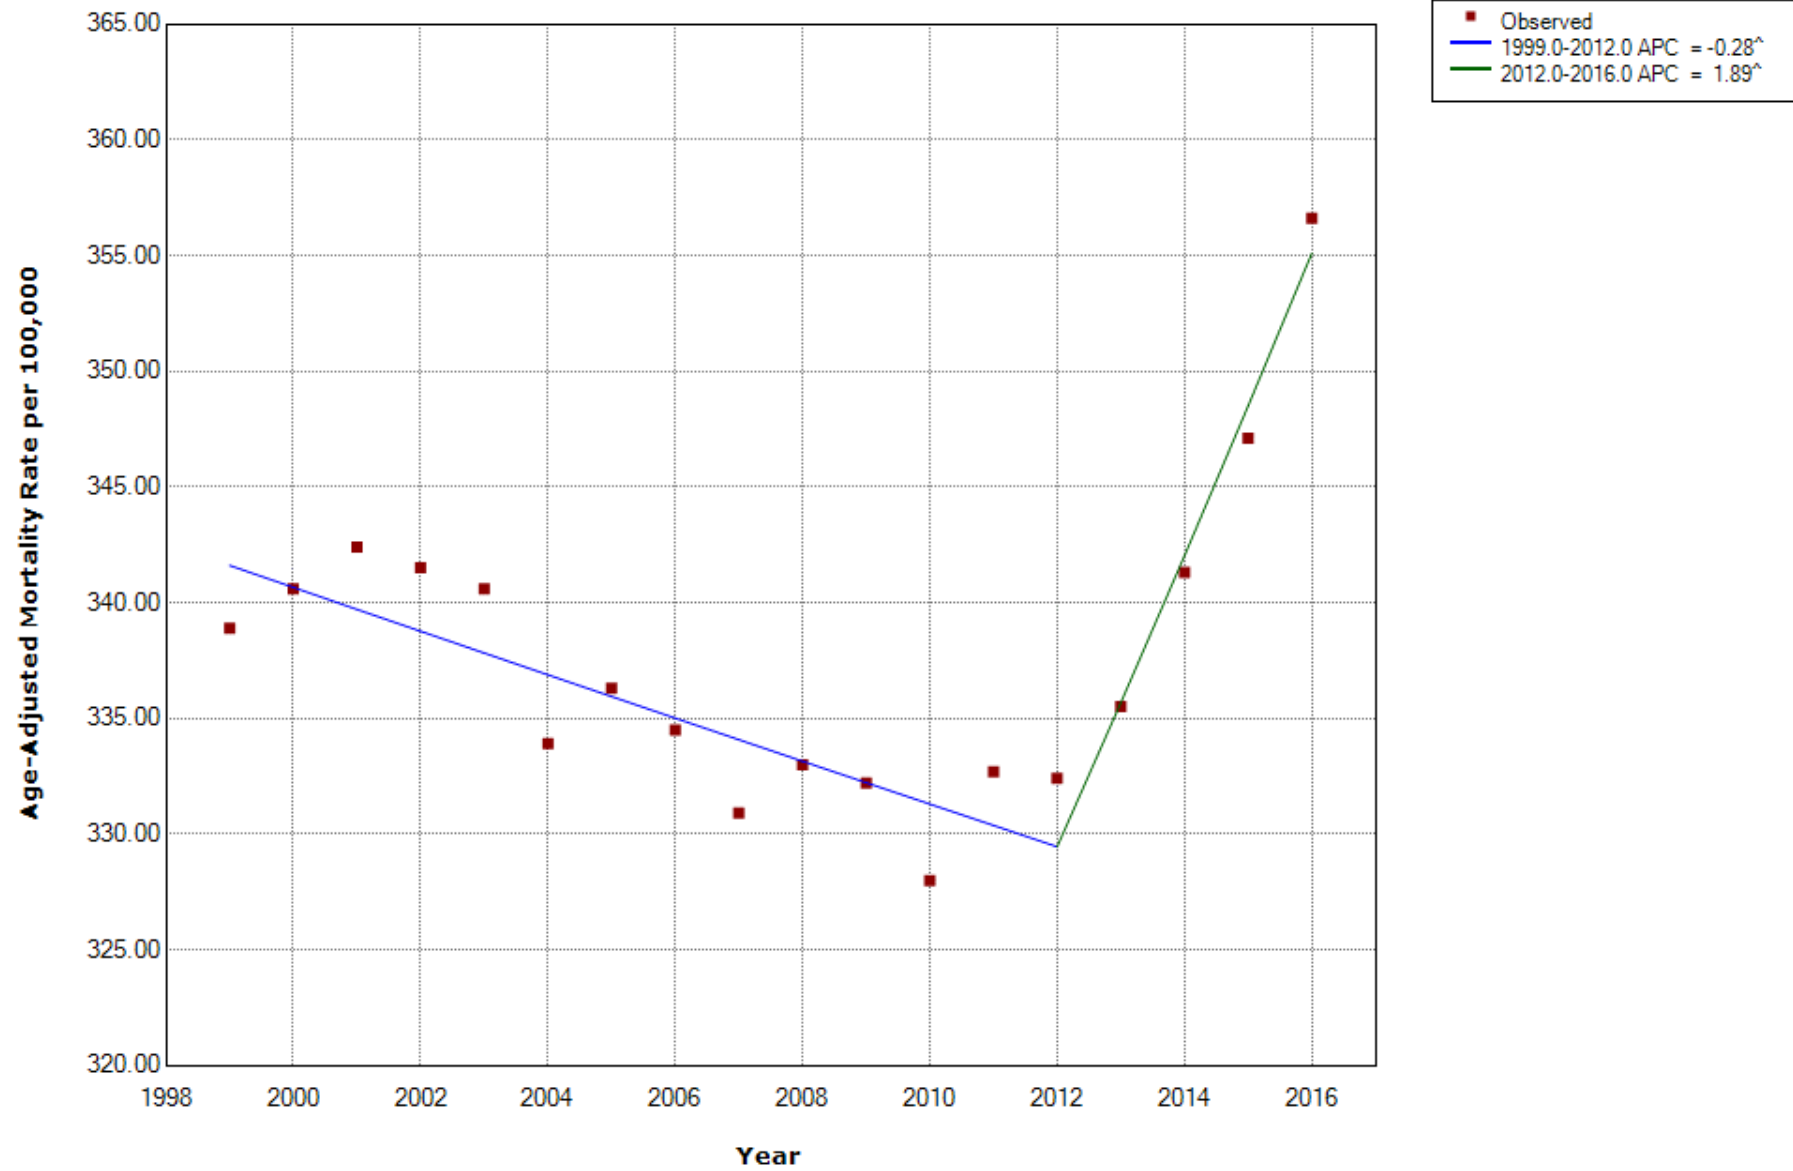

^ Indicates that the Annual Percent Change (APC) is significantly different from zero at the alpha = 0.05 level.  
Final Selected Model: 1 Joinpoint.

### All-cause mortality (A00-Y89) / Hispanics: 2 Joinpoints

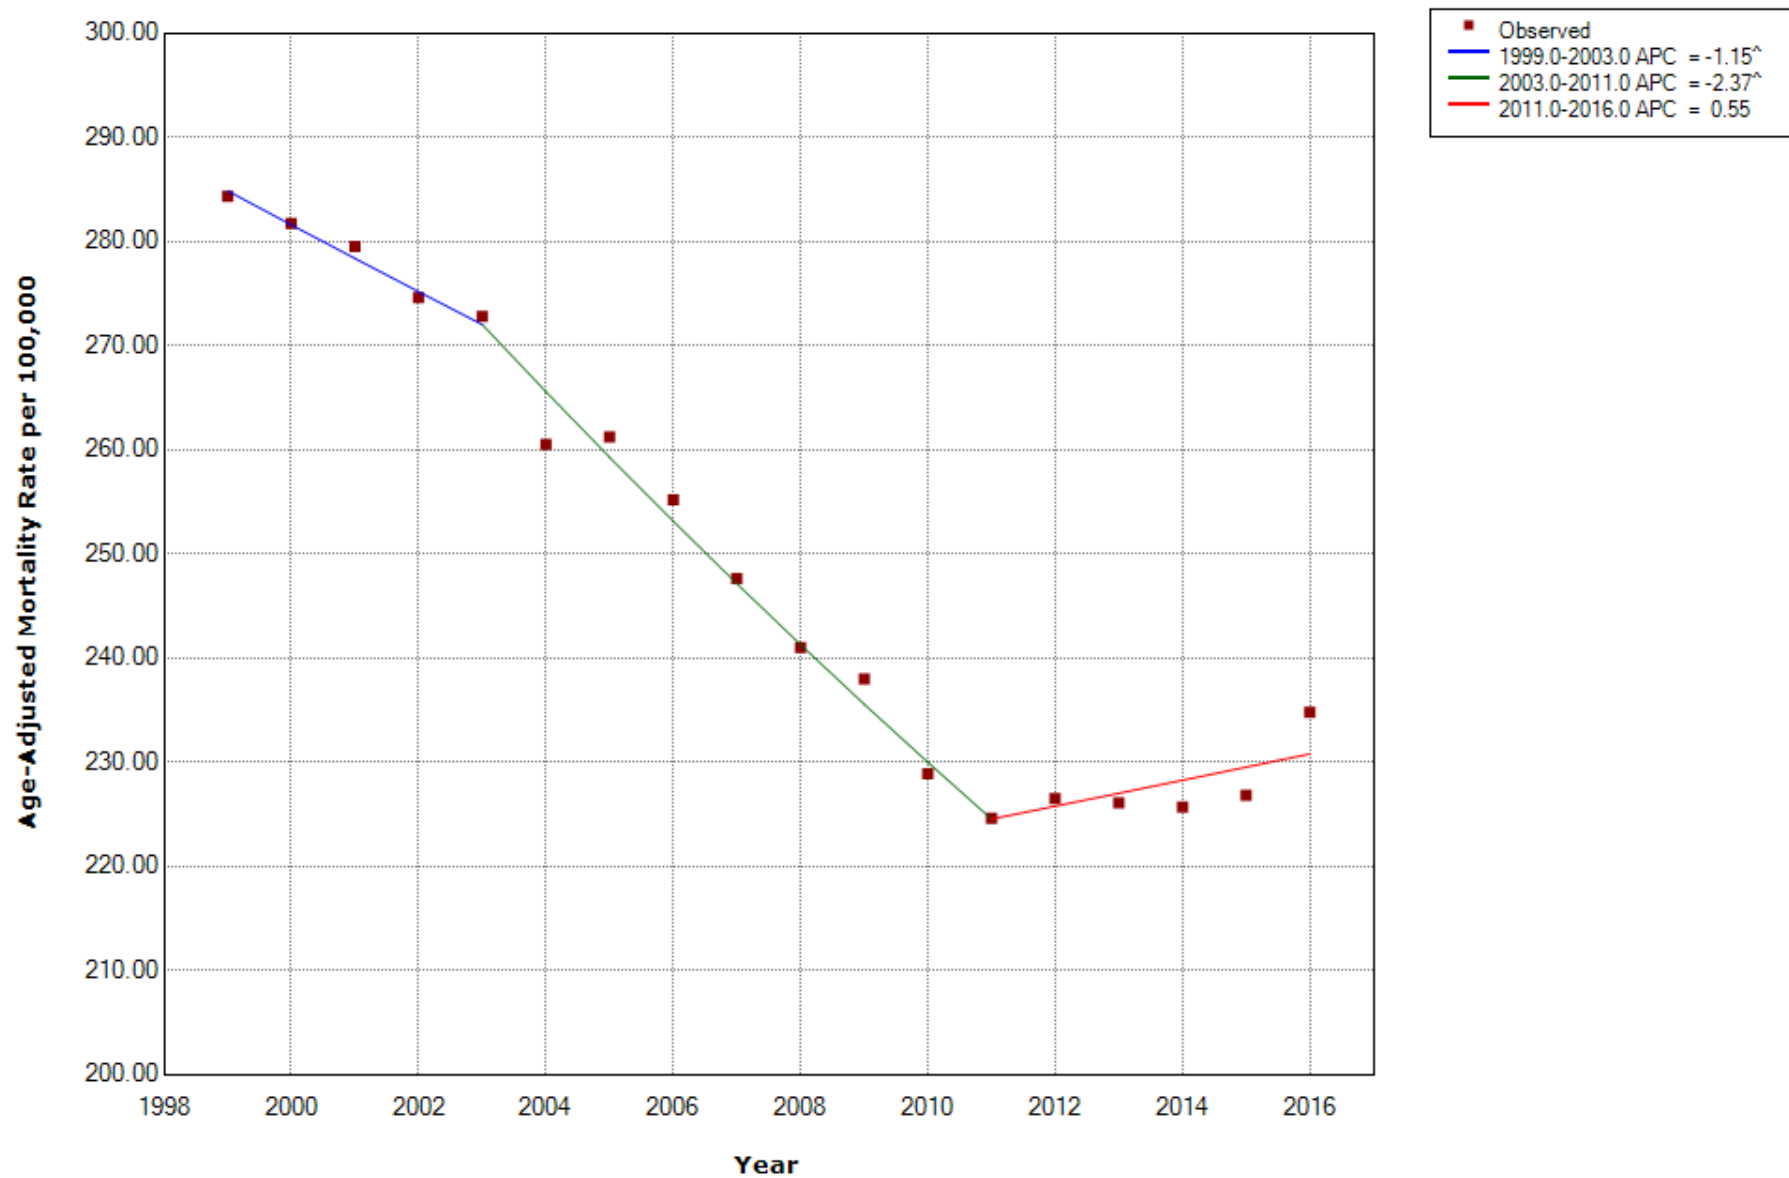

^ Indicates that the Annual Percent Change (APC) is significantly different from zero at the alpha = 0.05 level.  
Final Selected Model: 2 Joinpoints.

EXTRANEOUS (EXTERNAL) CAUSES (V01-Y89) / NH AIAN: 0 Joinpoints

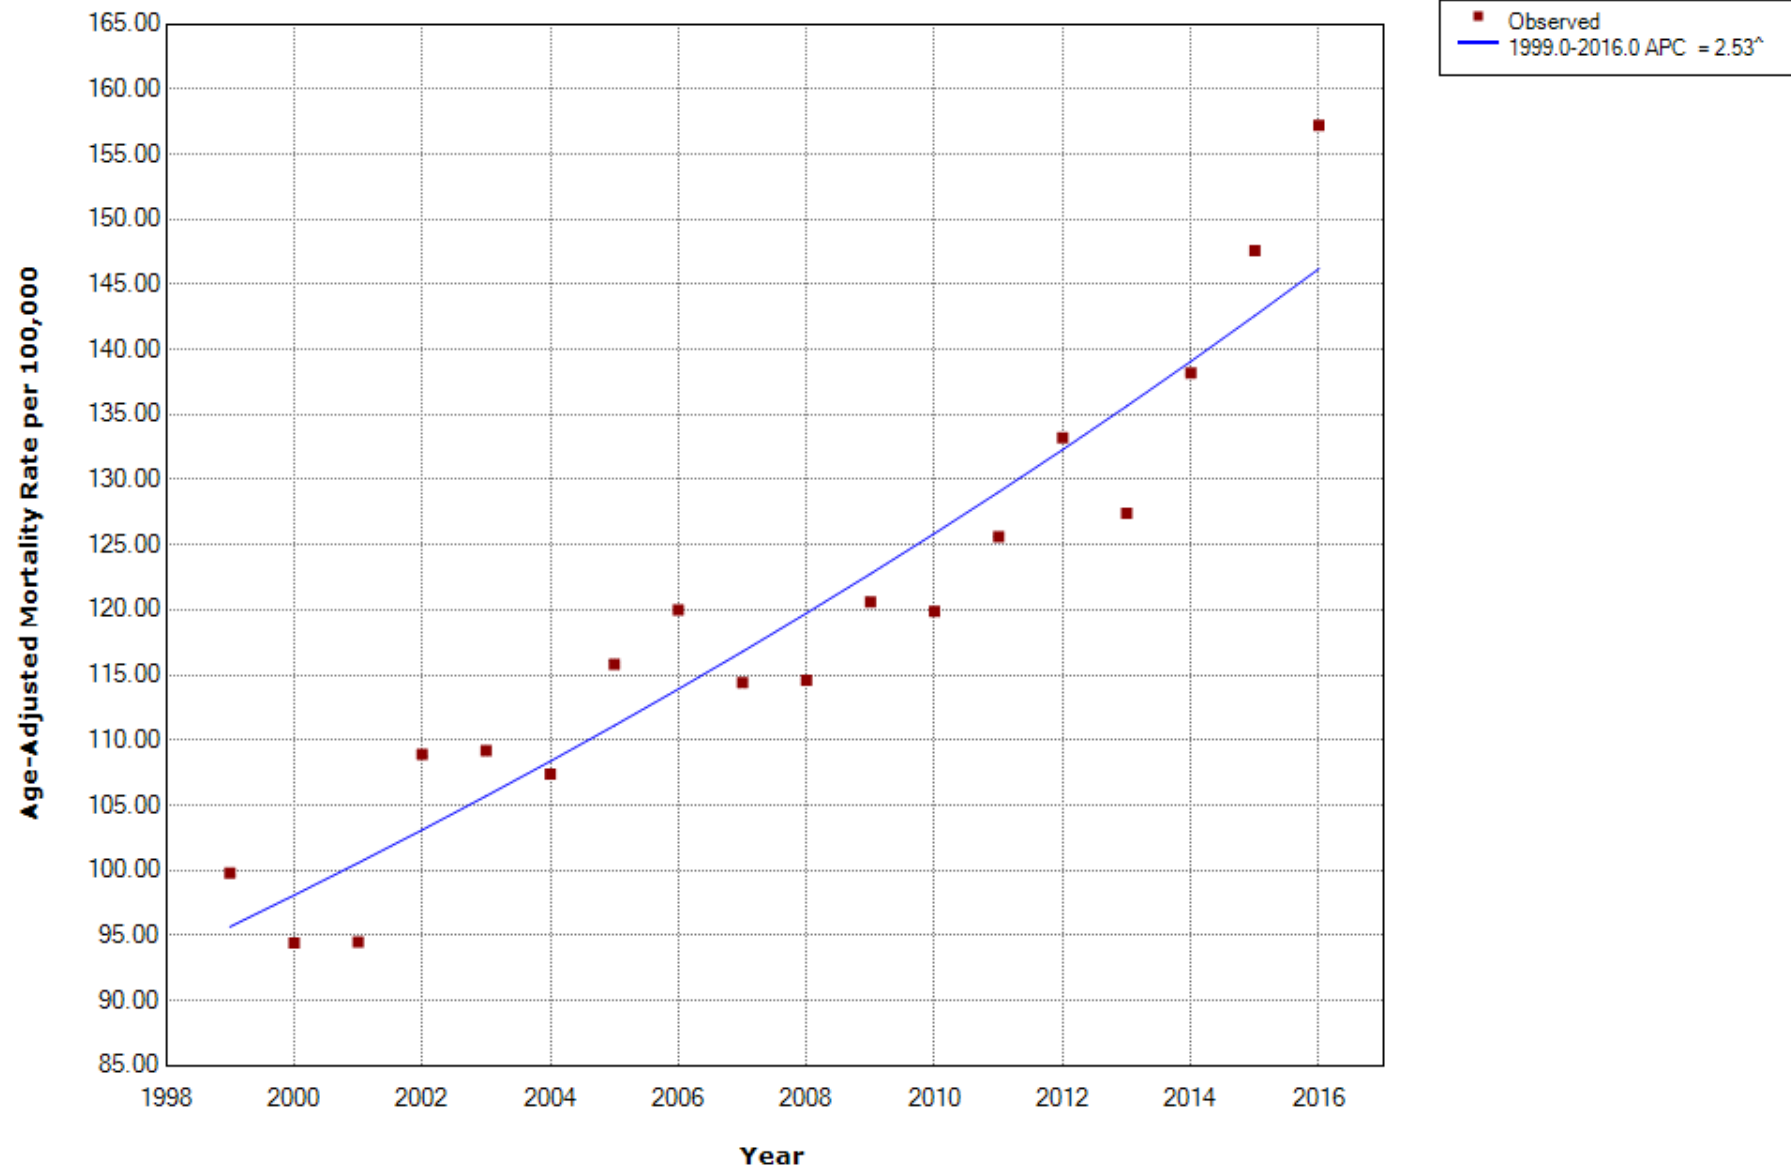

^ Indicates that the Annual Percent Change (APC) is significantly different from zero at the alpha = 0.05 level.  
Final Selected Model: 0 Joinpoints.



EXTRANEOUS (EXTERNAL) CAUSES (V01-Y89) / NH API: 1 Joinpoint

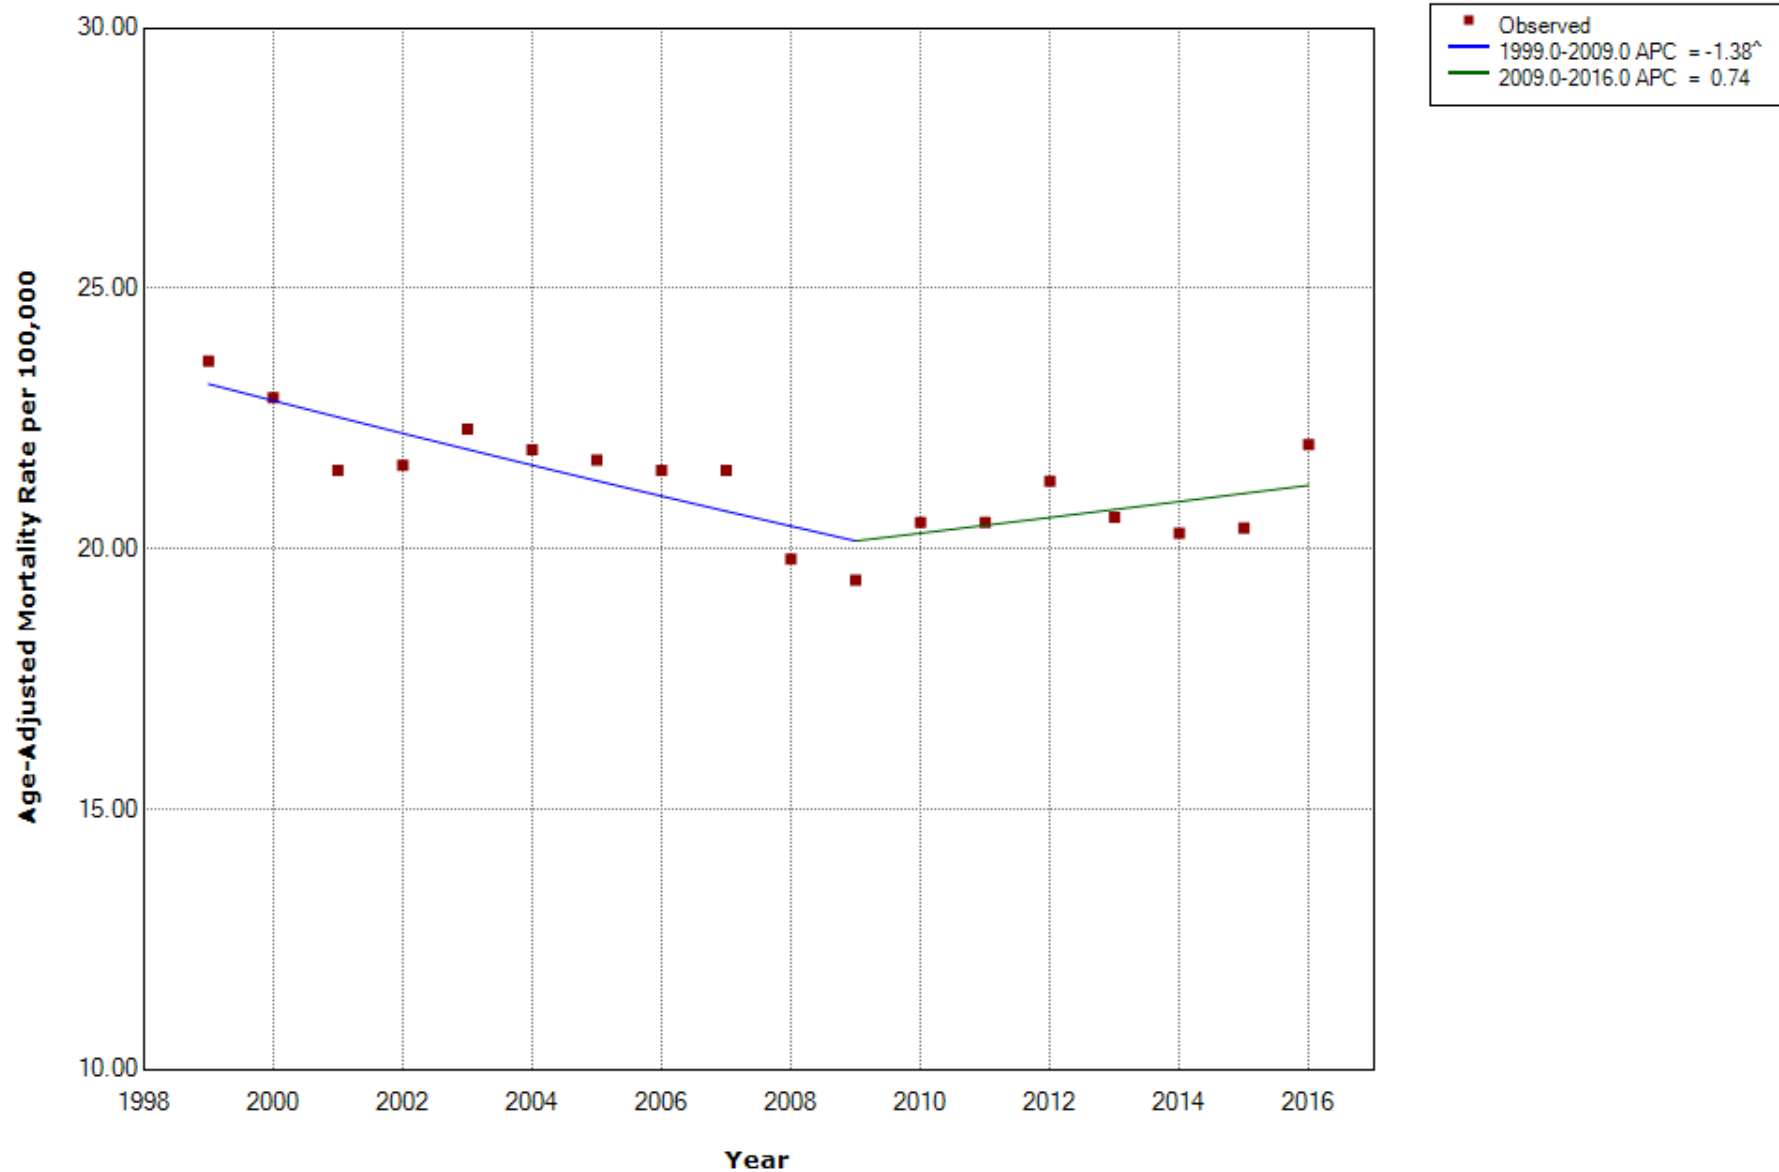

^ Indicates that the Annual Percent Change (APC) is significantly different from zero at the alpha = 0.05 level.  
Final Selected Model: 1 Joinpoint.

### EXTRANEOUS (EXTERNAL) CAUSES (V01-Y89) / NH Blacks: 3 Joinpoints

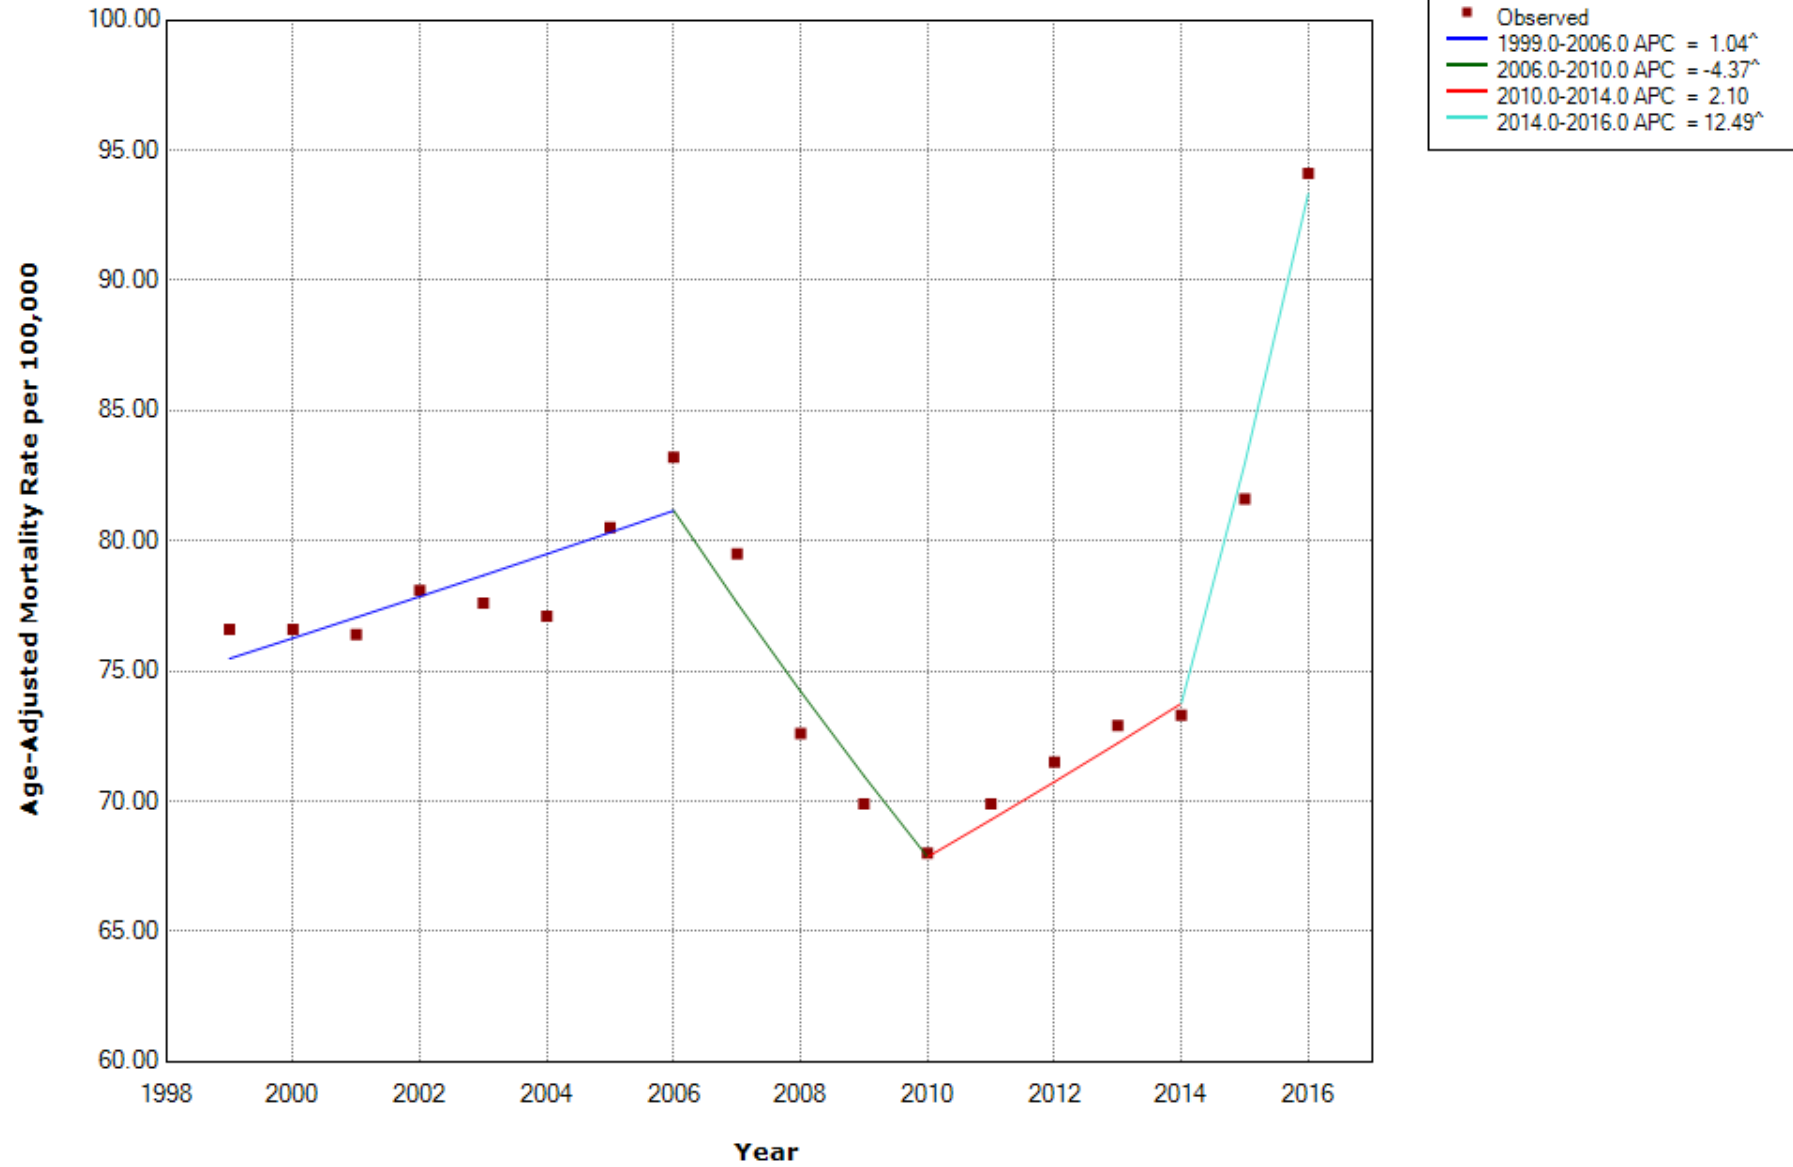

^ Indicates that the Annual Percent Change (APC) is significantly different from zero at the alpha = 0.05 level.  
Final Selected Model: 3 Joinpoints.

EXTRANEOUS (EXTERNAL) CAUSES (V01-Y89) / NH whites: 2 Joinpoints

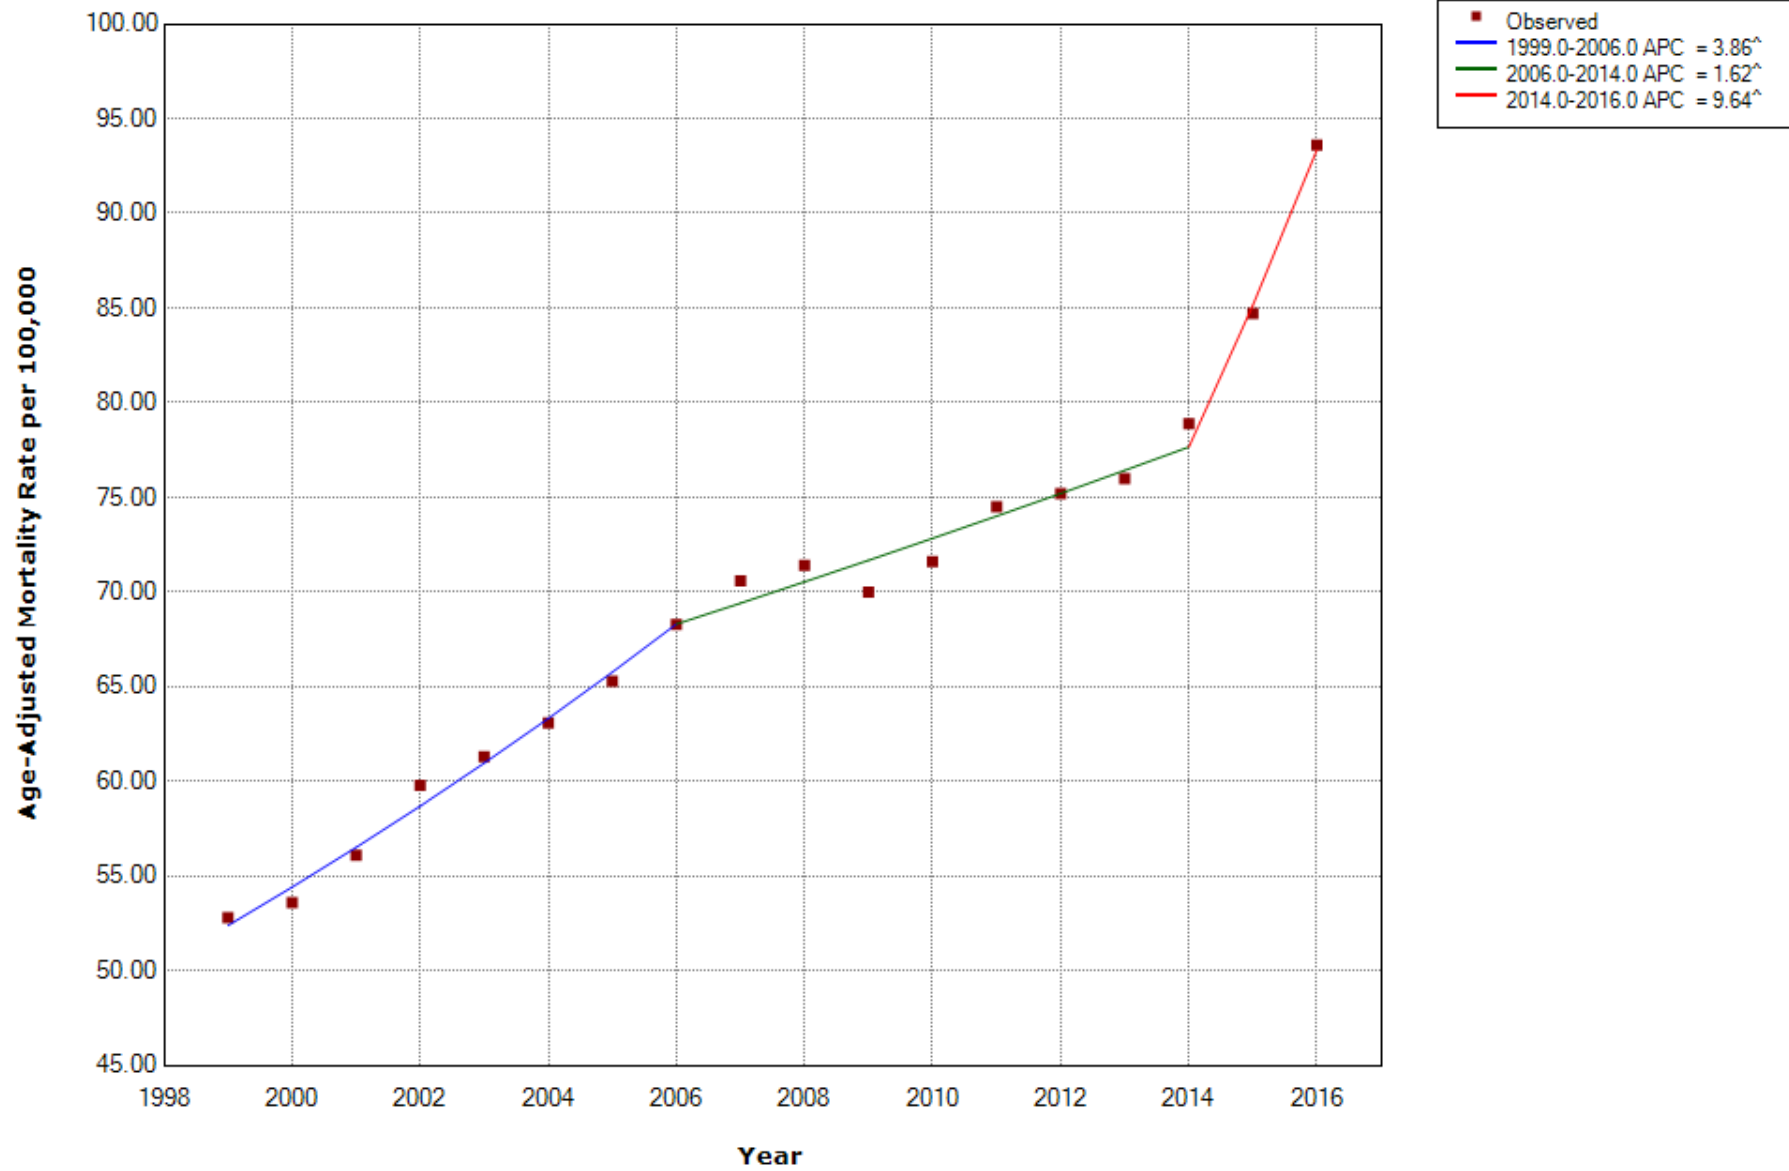

^ Indicates that the Annual Percent Change (APC) is significantly different from zero at the alpha = 0.05 level.  
Final Selected Model: 2 Joinpoints.

### EXTRANEOUS (EXTERNAL) CAUSES (V01-Y89) / Hispanics: 3 Joinpoints

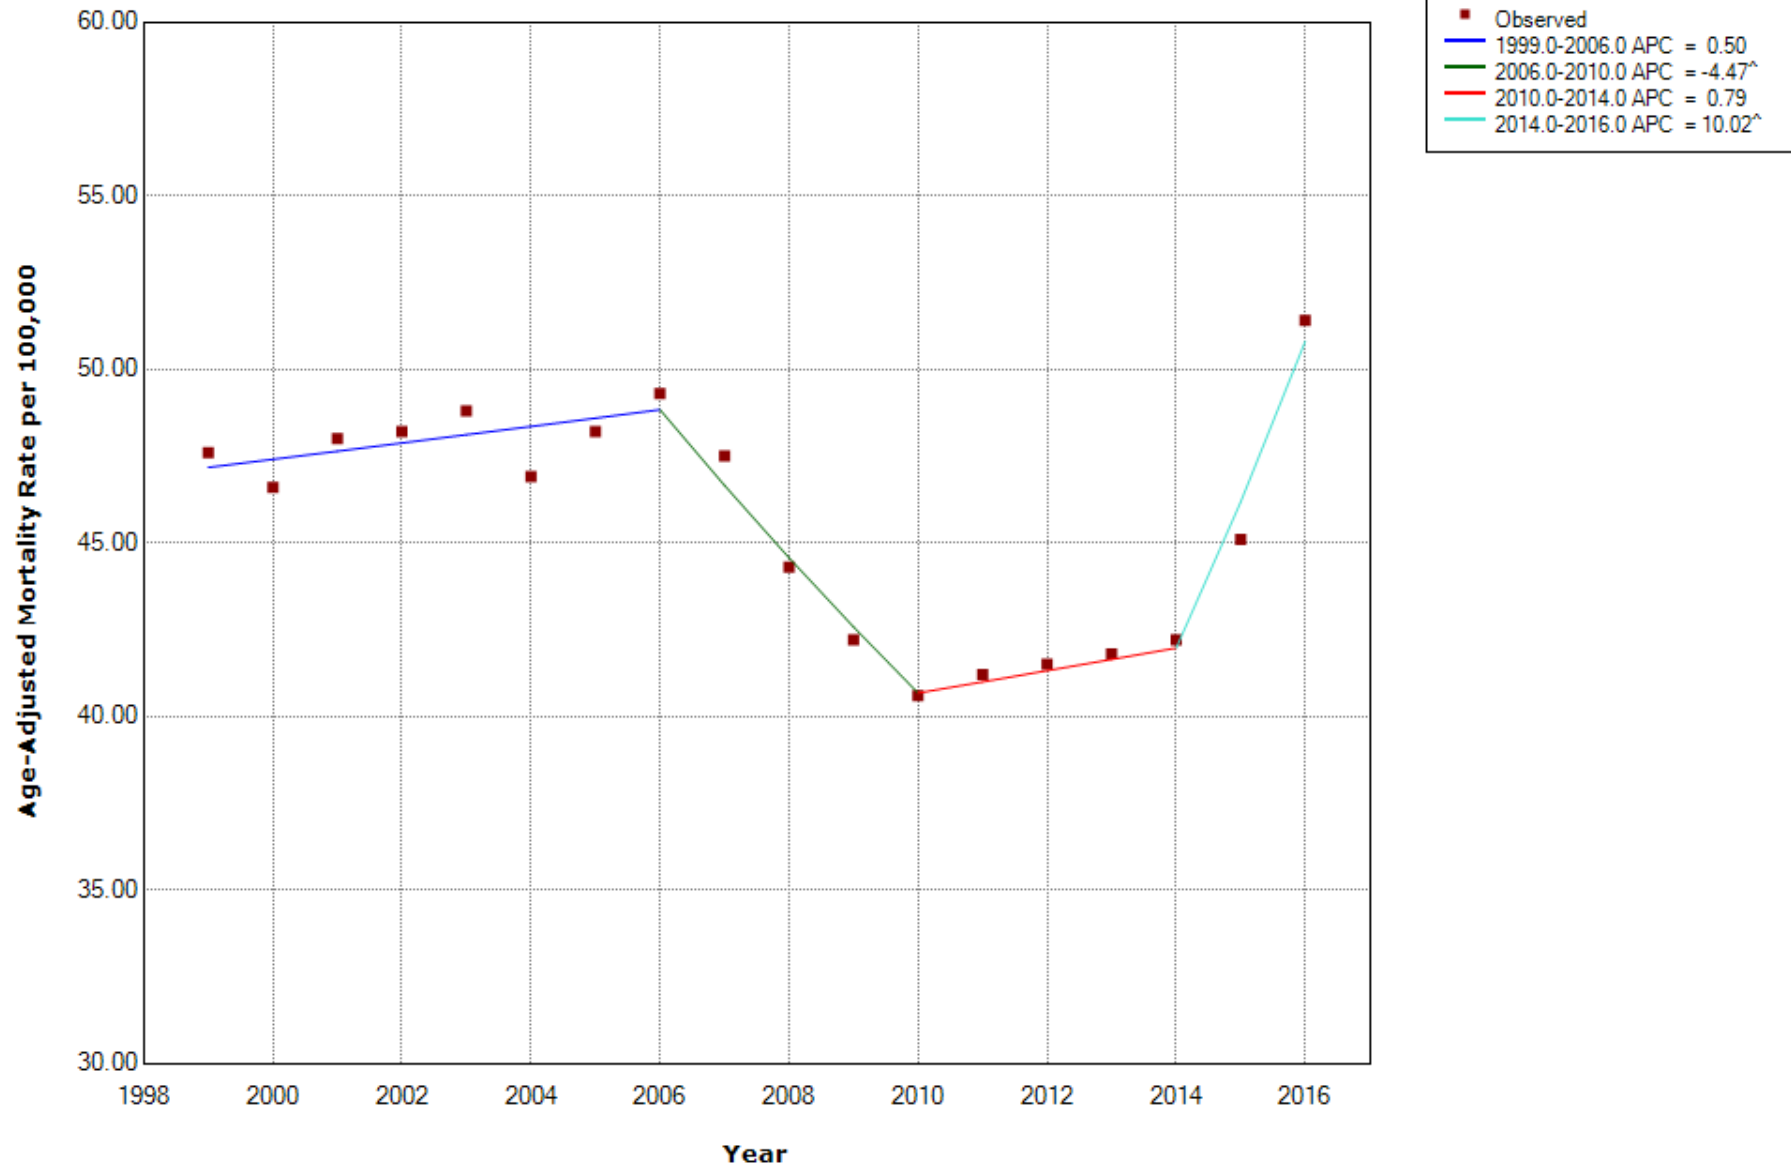

^ Indicates that the Annual Percent Change (APC) is significantly different from zero at the alpha = 0.05 level.  
Final Selected Model: 3 Joinpoints.

Diseases of the circulatory system (I00-I99) / NH AIAN: 1 Joinpoint

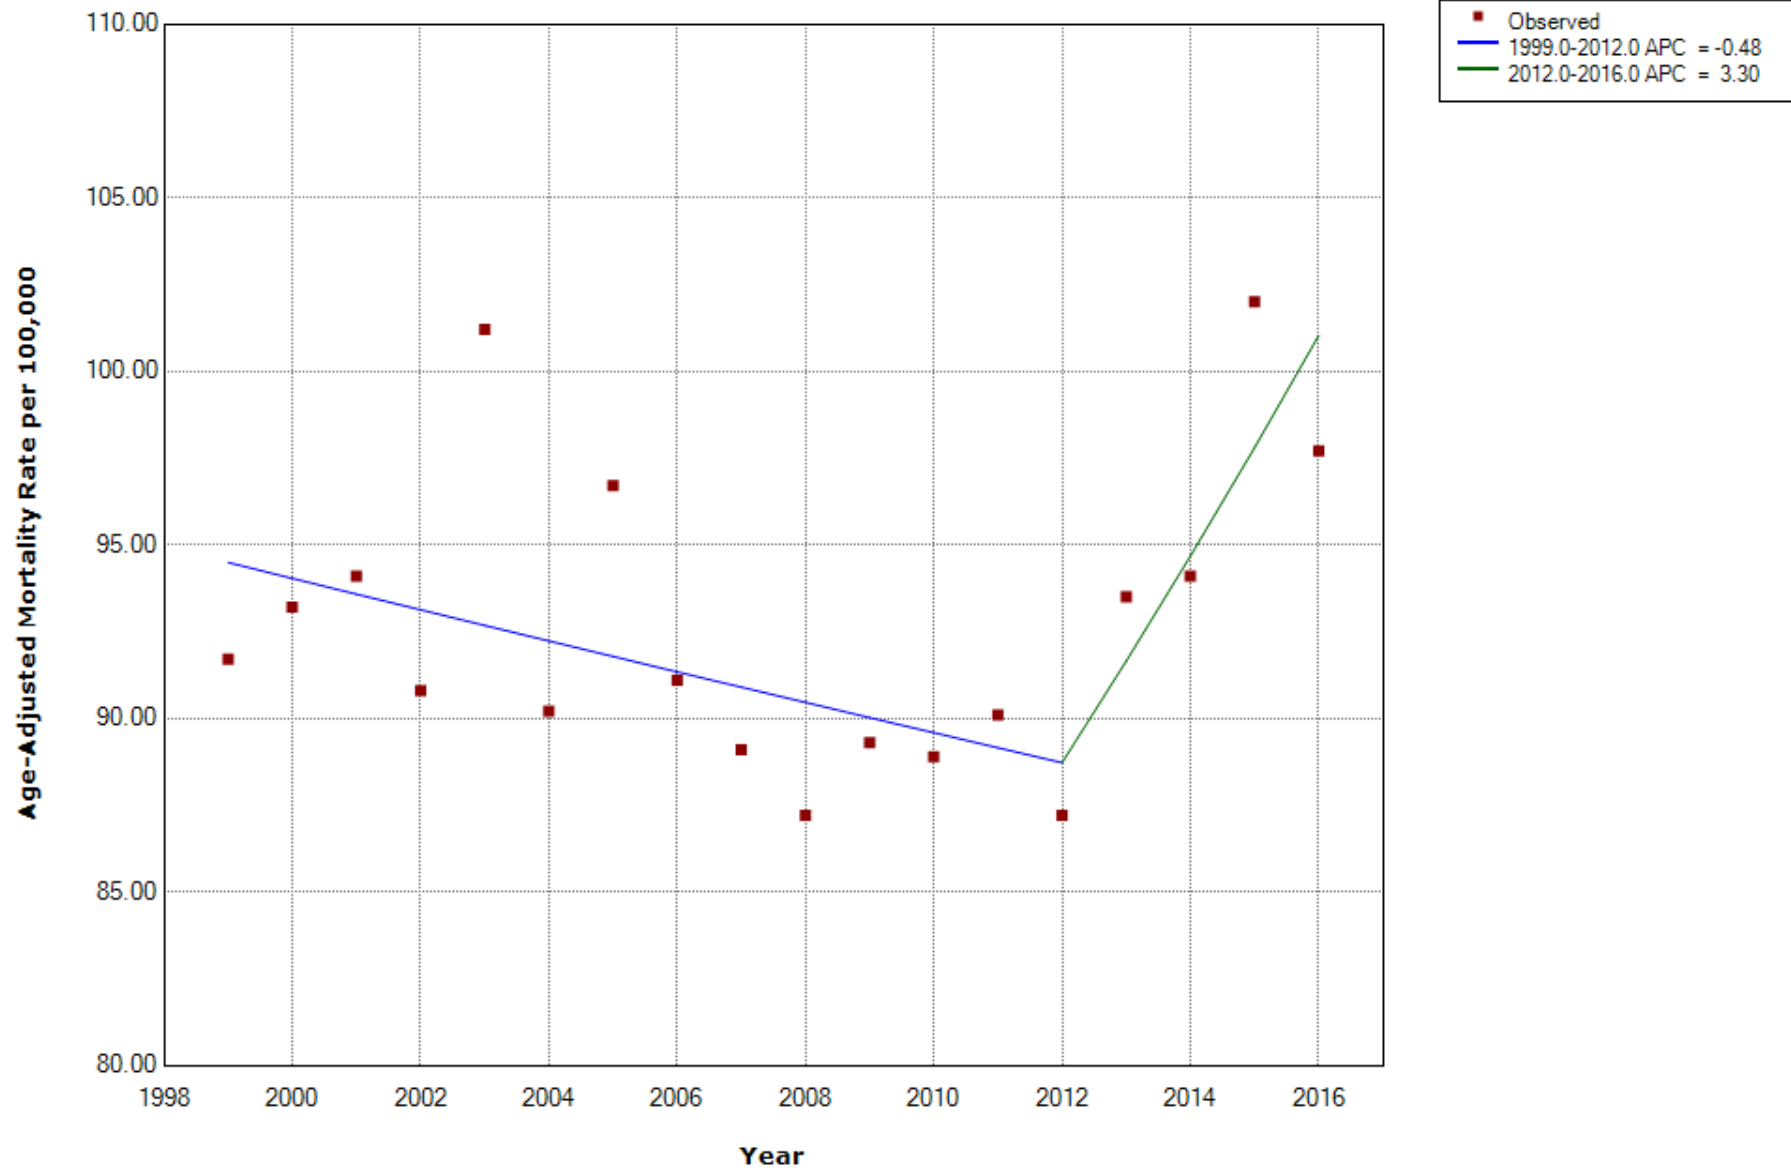

^ Indicates that the Annual Percent Change (APC) is significantly different from zero at the alpha = 0.05 level.  
Final Selected Model: 1 Joinpoint.

### Diseases of the circulatory system (I00-I99) / NH API: 1 Joinpoint

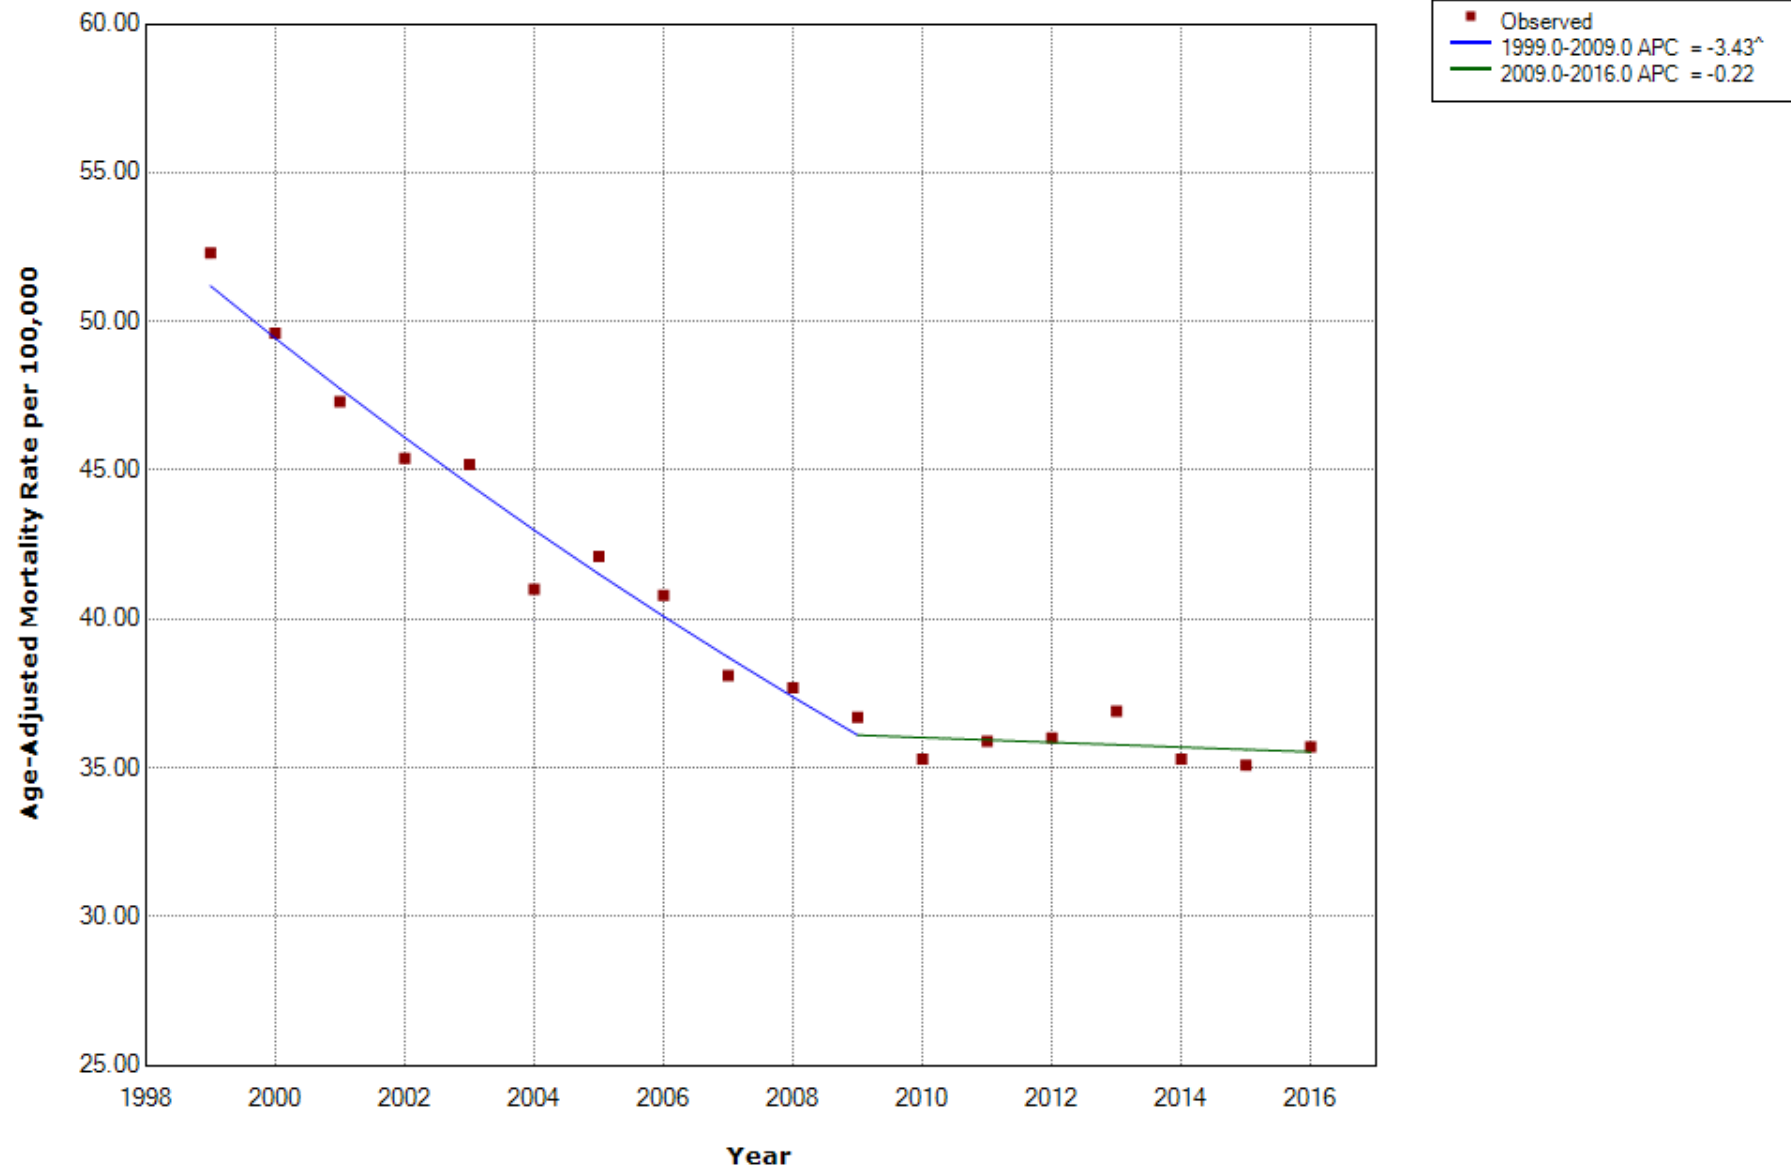

^ Indicates that the Annual Percent Change (APC) is significantly different from zero at the alpha = 0.05 level.  
Final Selected Model: 1 Joinpoint.

### Diseases of the circulatory system (I00-I99) / NH Blacks: 2 Joinpoints

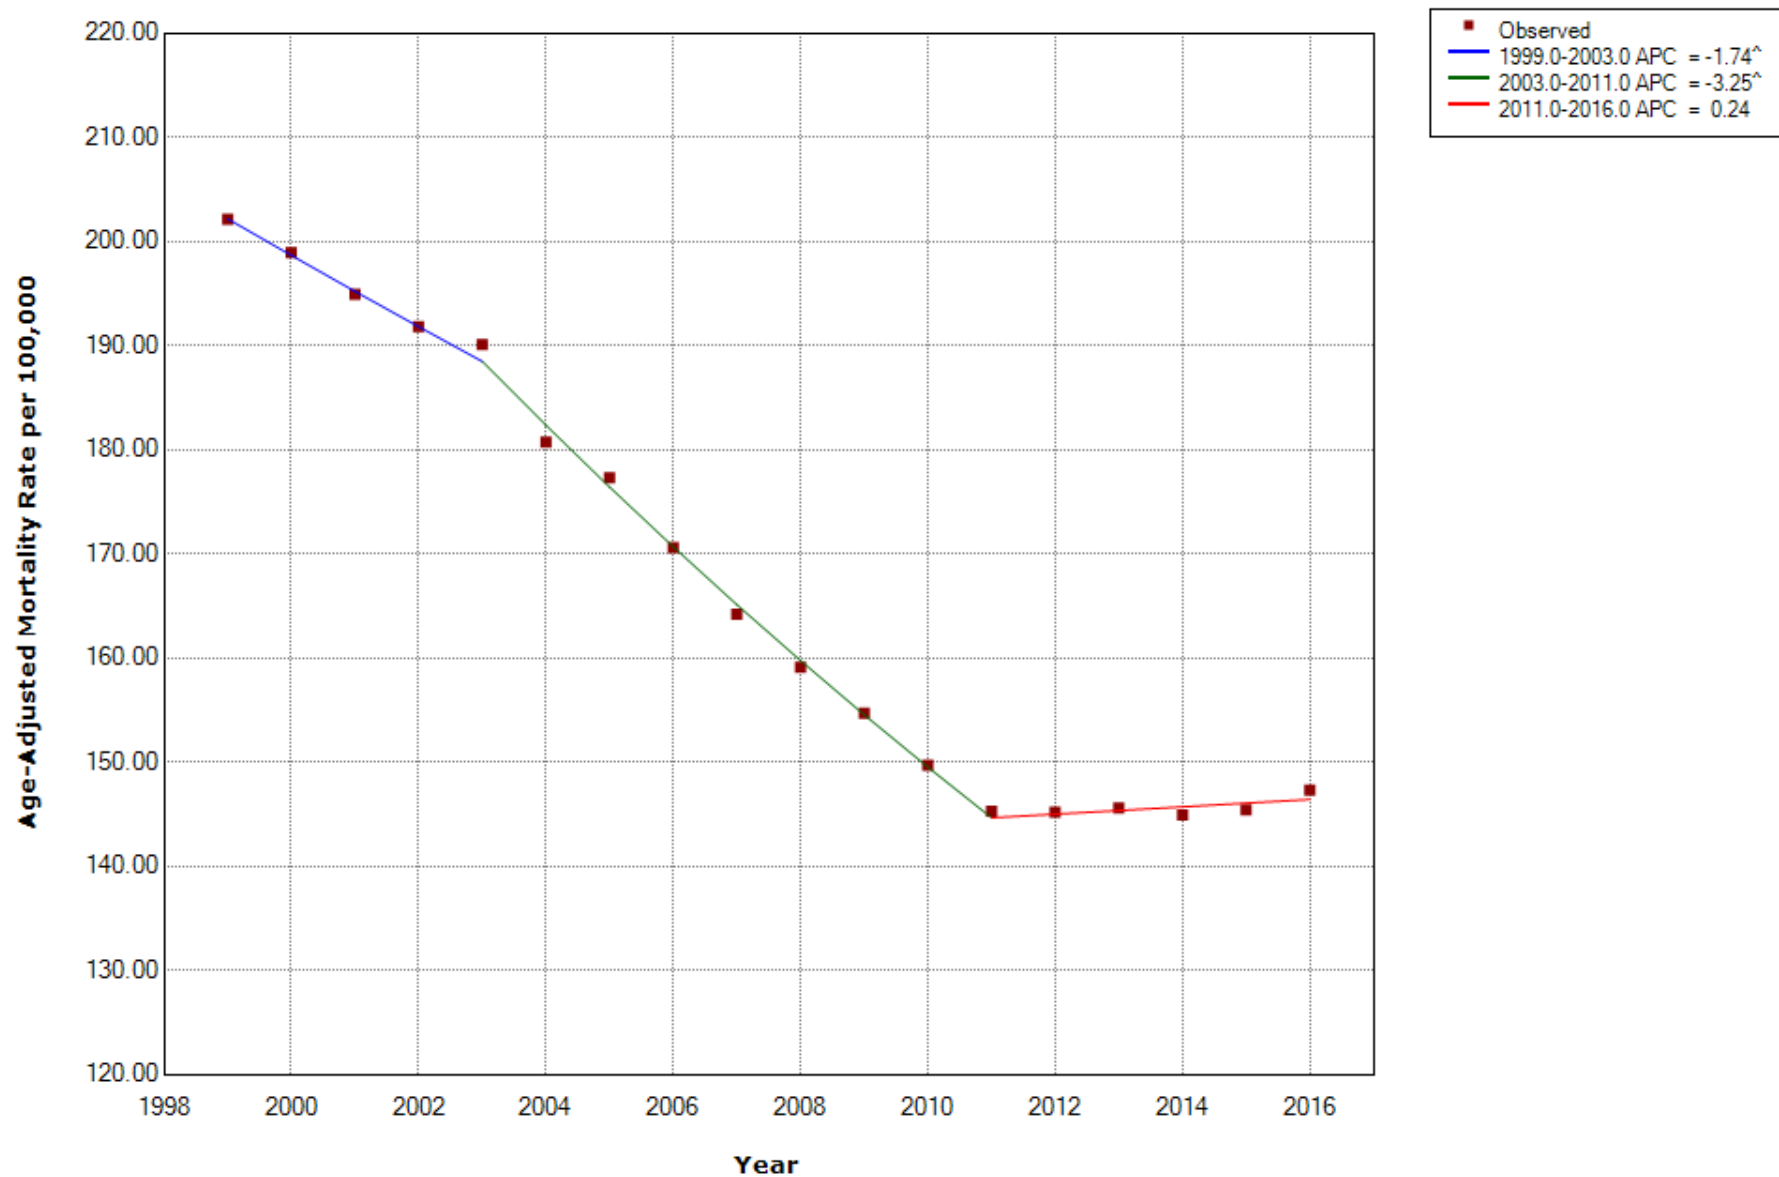

<sup>^</sup> Indicates that the Annual Percent Change (APC) is significantly different from zero at the alpha = 0.05 level.  
Final Selected Model: 2 Joinpoints.

### Diseases of the circulatory system (I00-I99) / NH whites: 1 Joinpoint

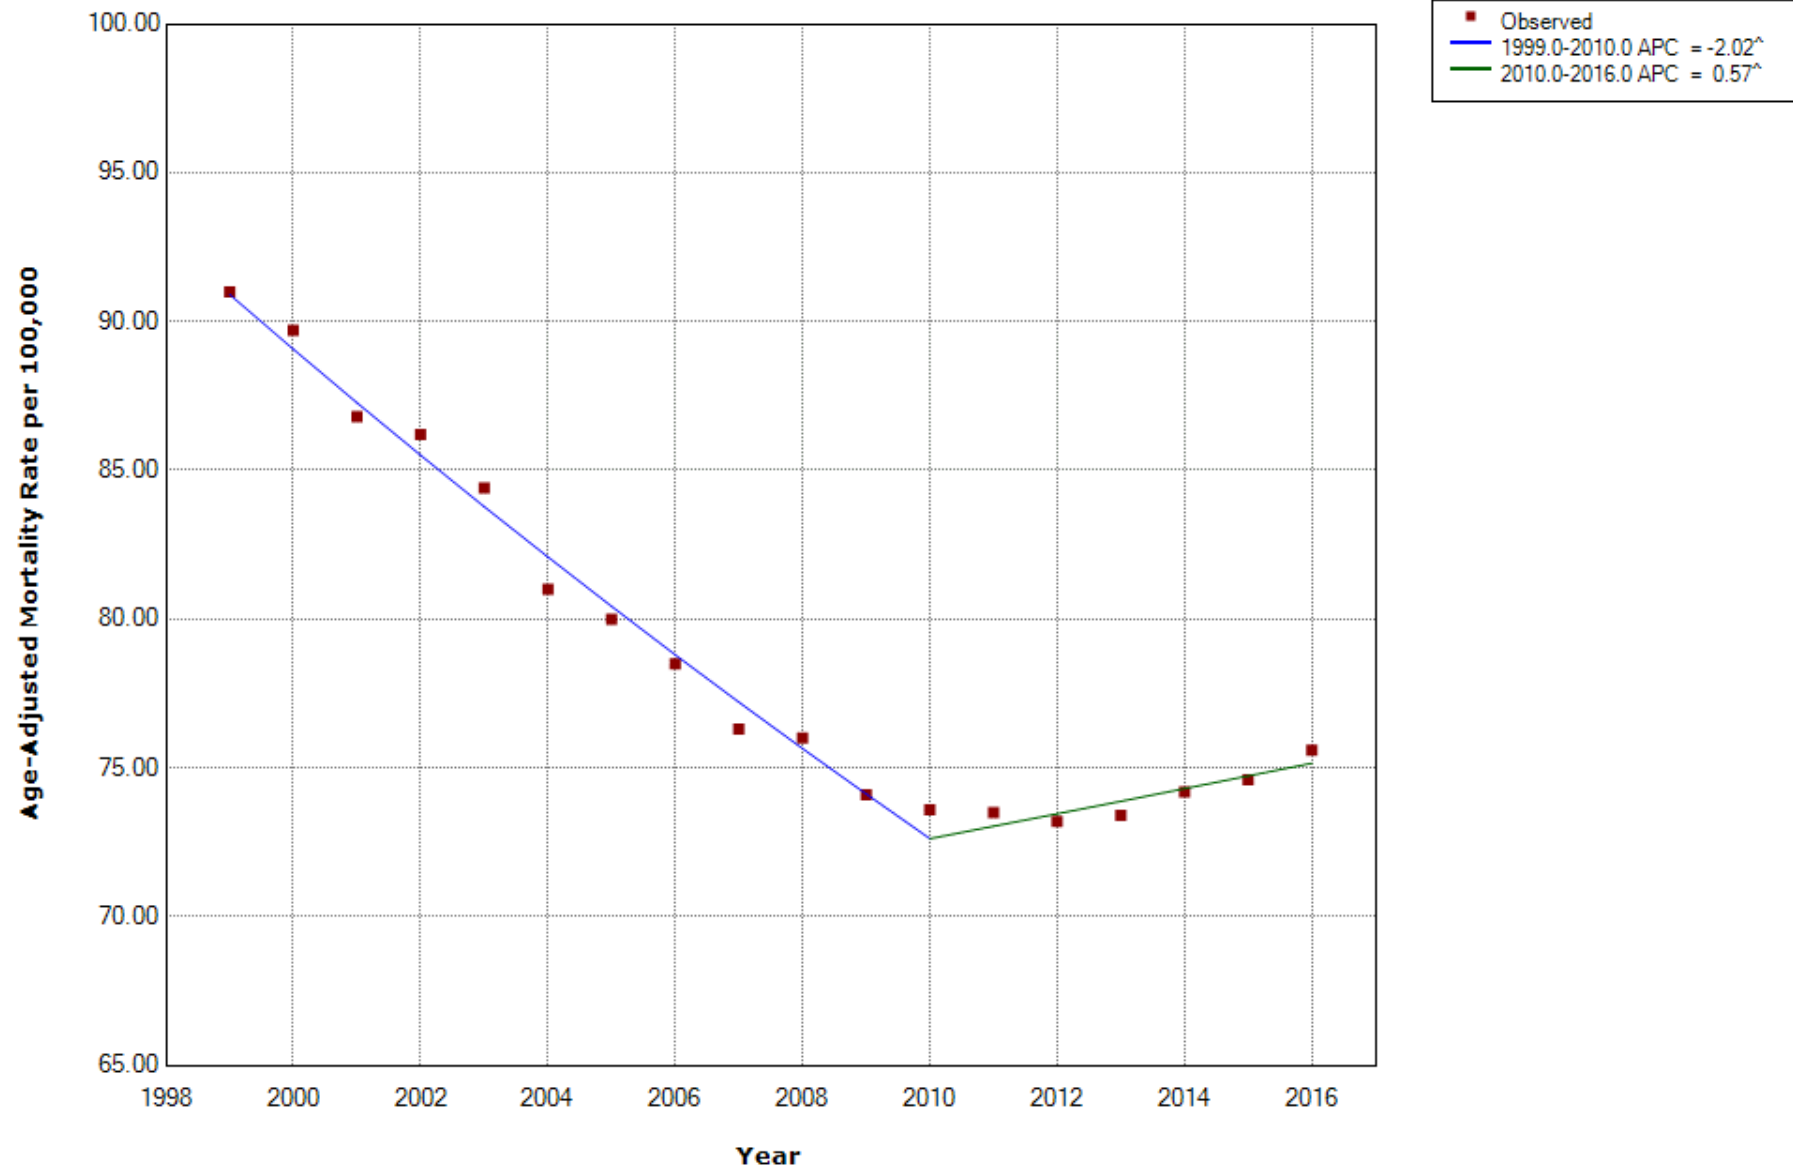

<sup>^</sup> Indicates that the Annual Percent Change (APC) is significantly different from zero at the alpha = 0.05 level.  
Final Selected Model: 1 Joinpoint.



Diseases of the circulatory system (I00-I99) / Hispanics: 1 Joinpoint

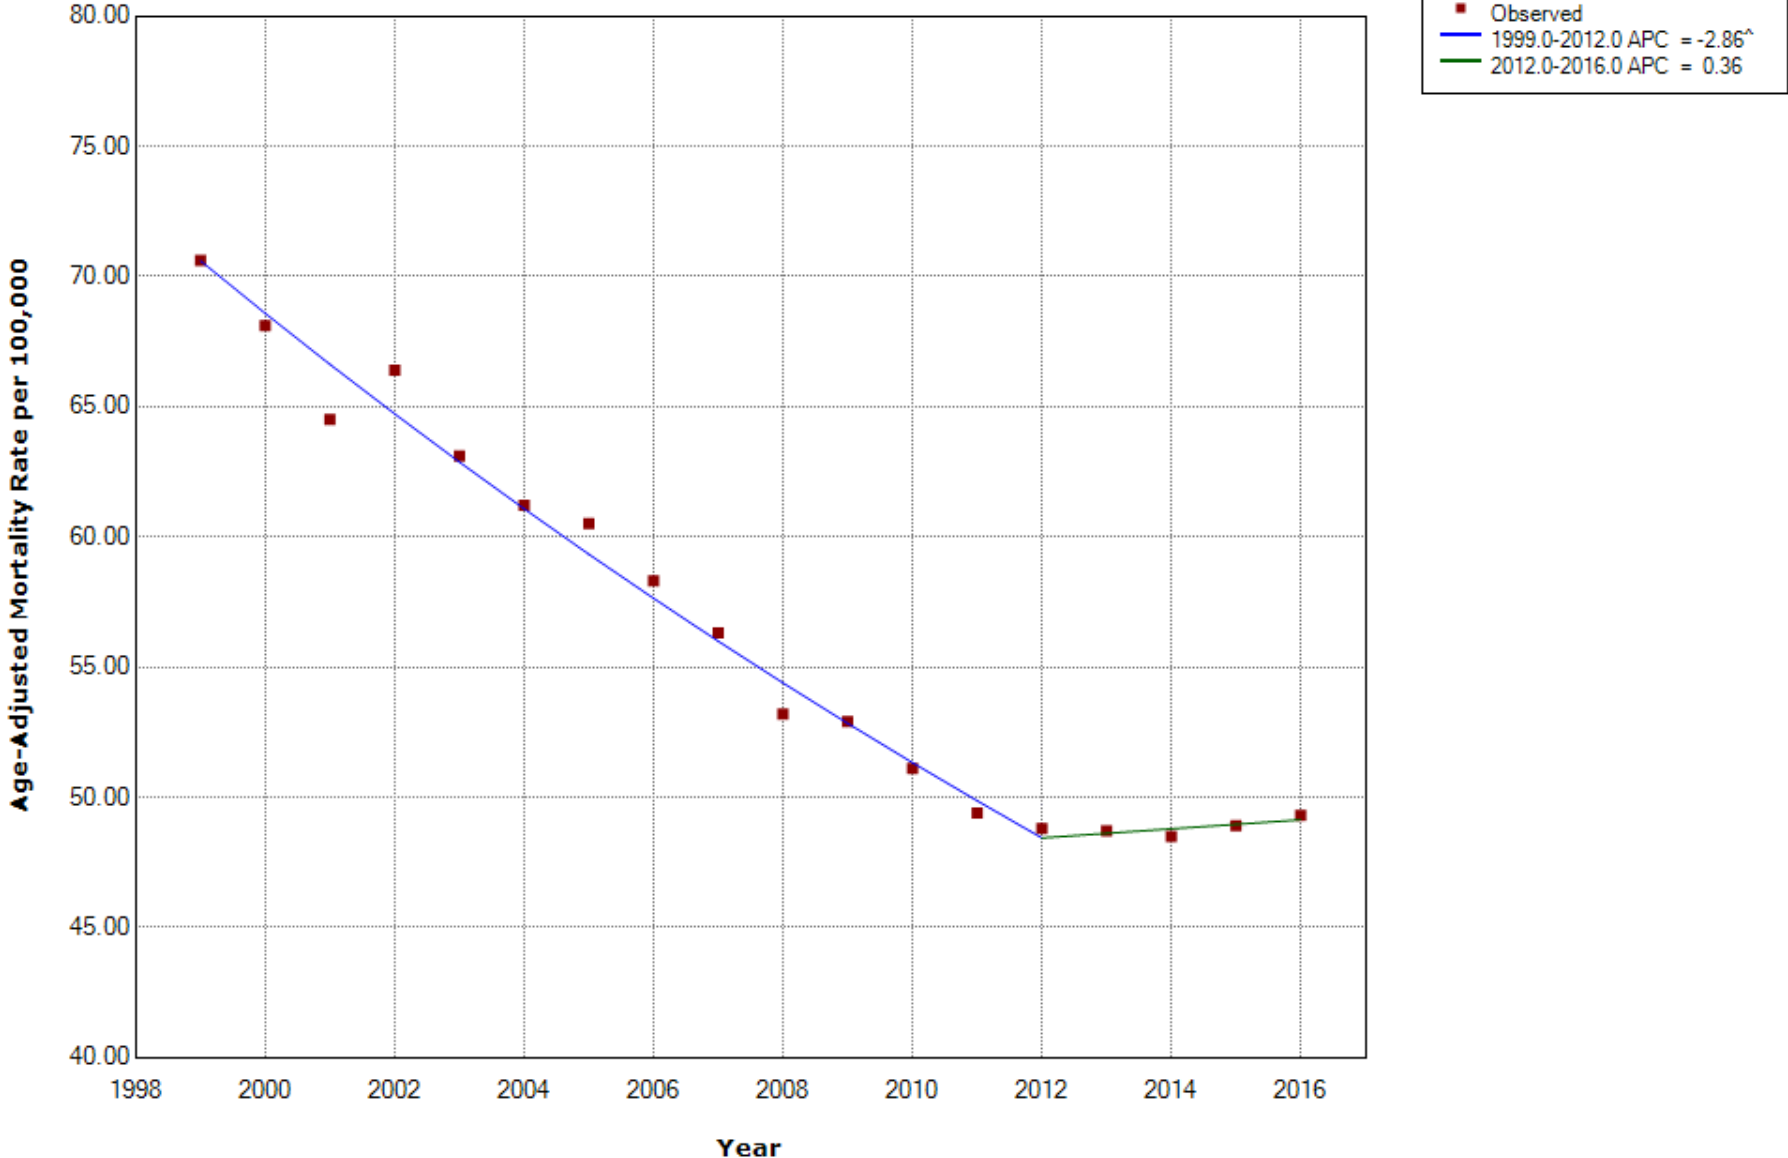

^ Indicates that the Annual Percent Change (APC) is significantly different from zero at the alpha = 0.05 level.  
Final Selected Model: 1 Joinpoint.

Diseases of the respiratory system (J00-J98) / NH AIAN: 0 Joinpoints

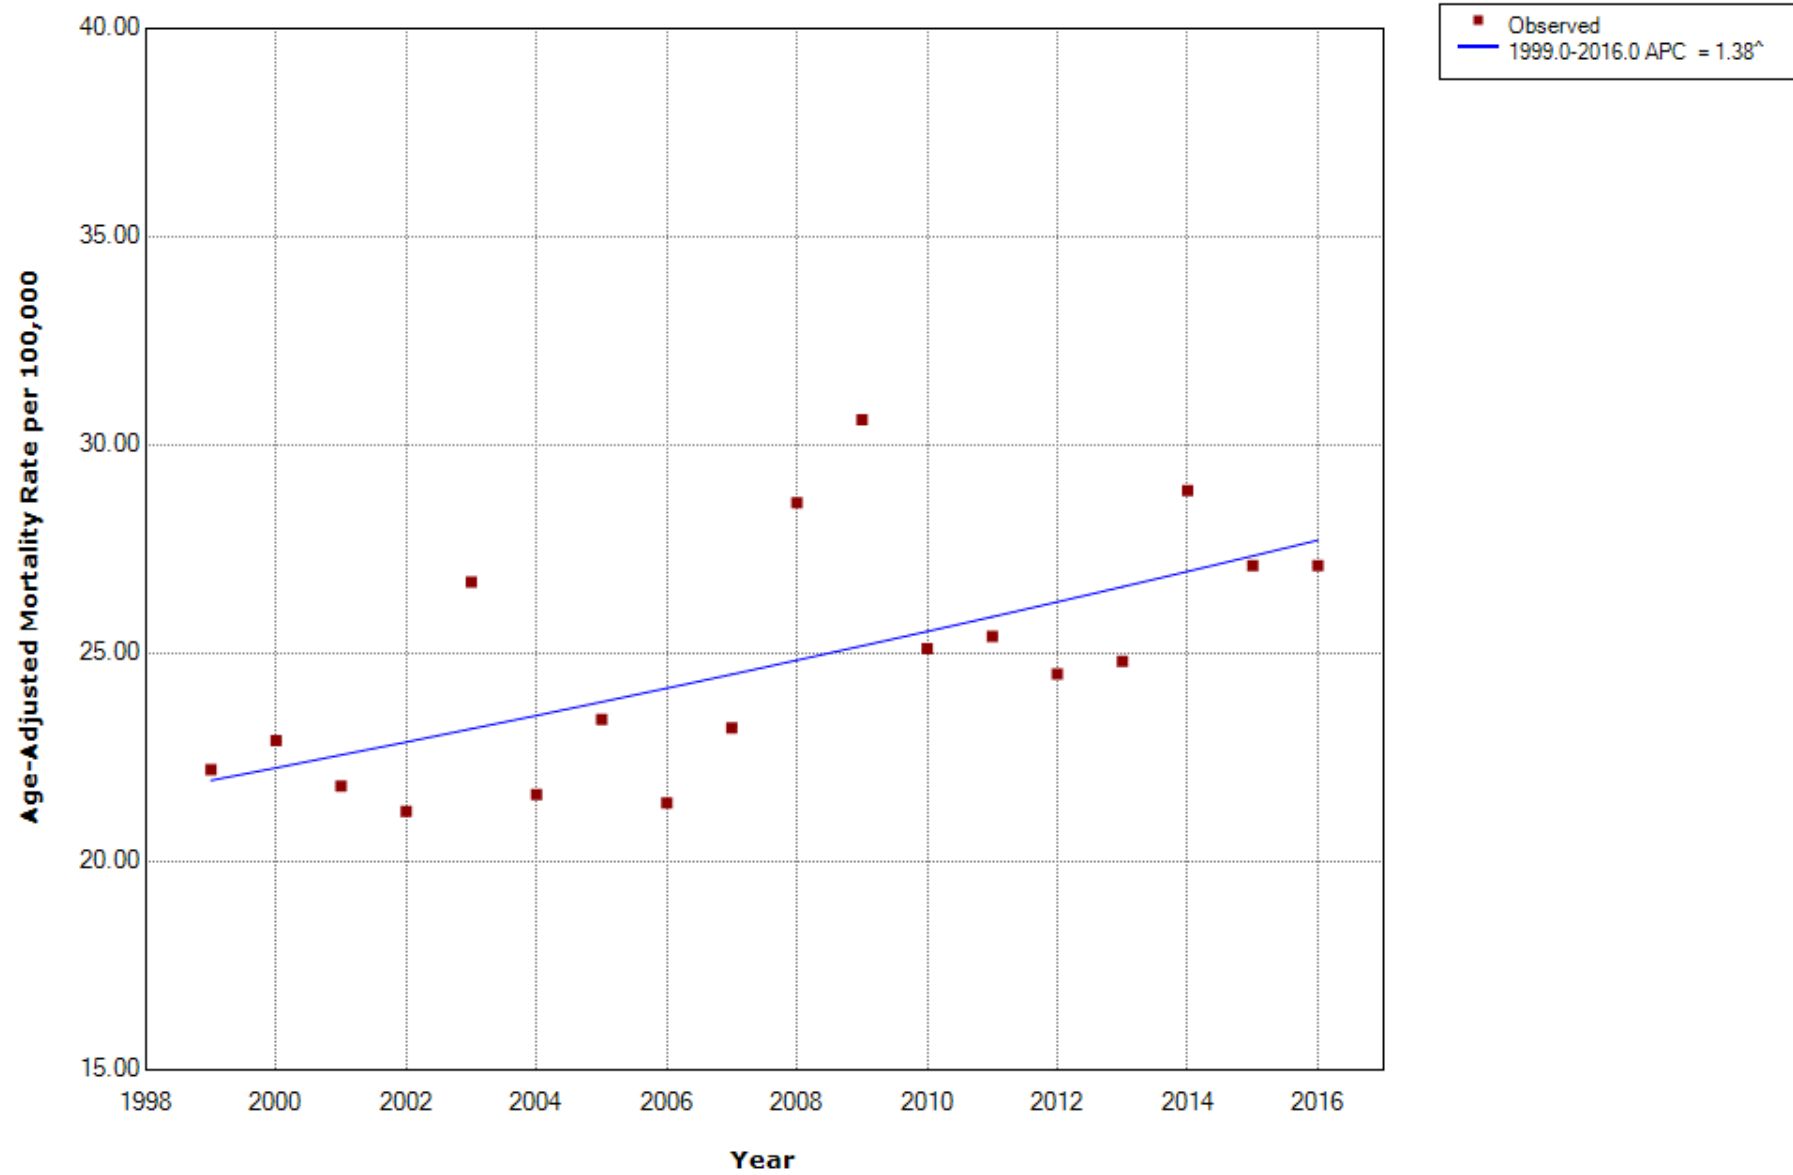

^ Indicates that the Annual Percent Change (APC) is significantly different from zero at the alpha = 0.05 level.  
Final Selected Model: 0 Joinpoints.

### Diseases of the respiratory system (J00-J98) / NH API: 1 Joinpoint

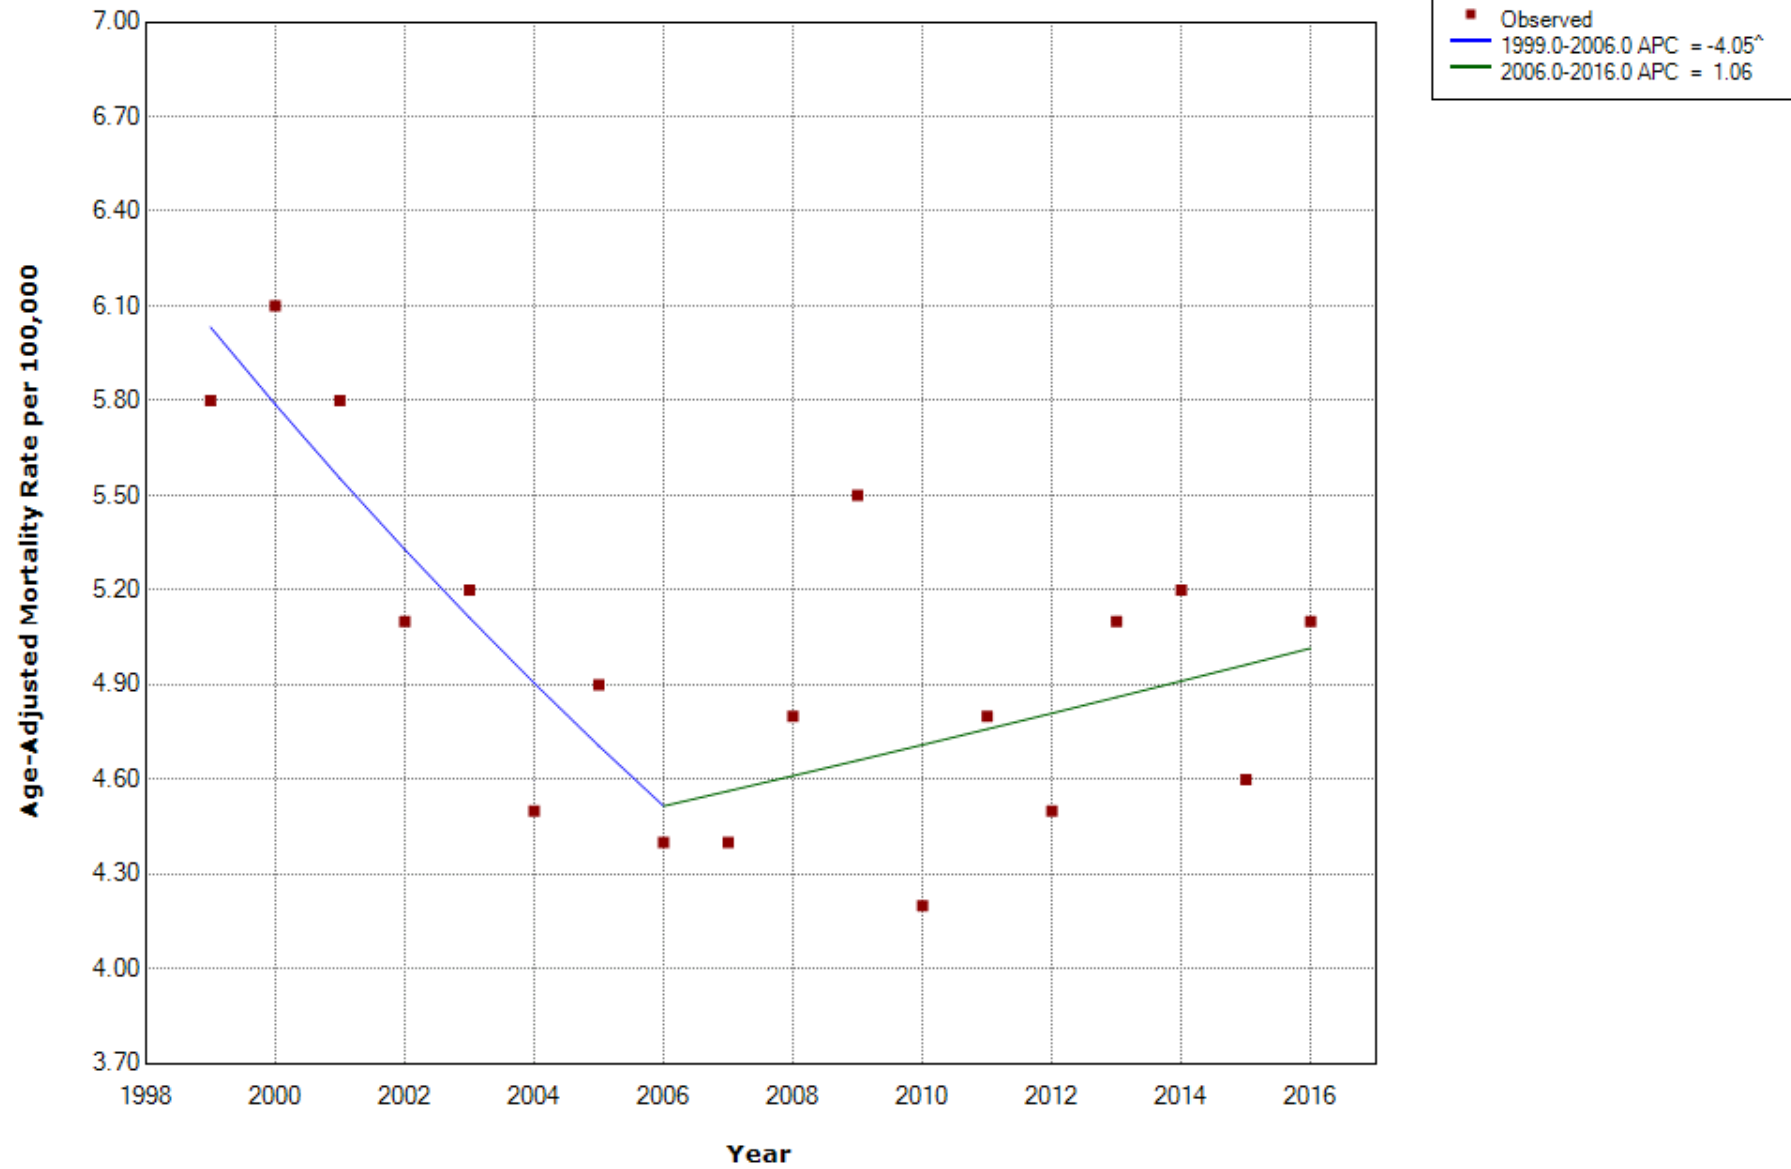

^ Indicates that the Annual Percent Change (APC) is significantly different from zero at the alpha = 0.05 level.  
Final Selected Model: 1 Joinpoint.

### Diseases of the respiratory system (J00-J98) / NH Blacks: 1 Joinpoint

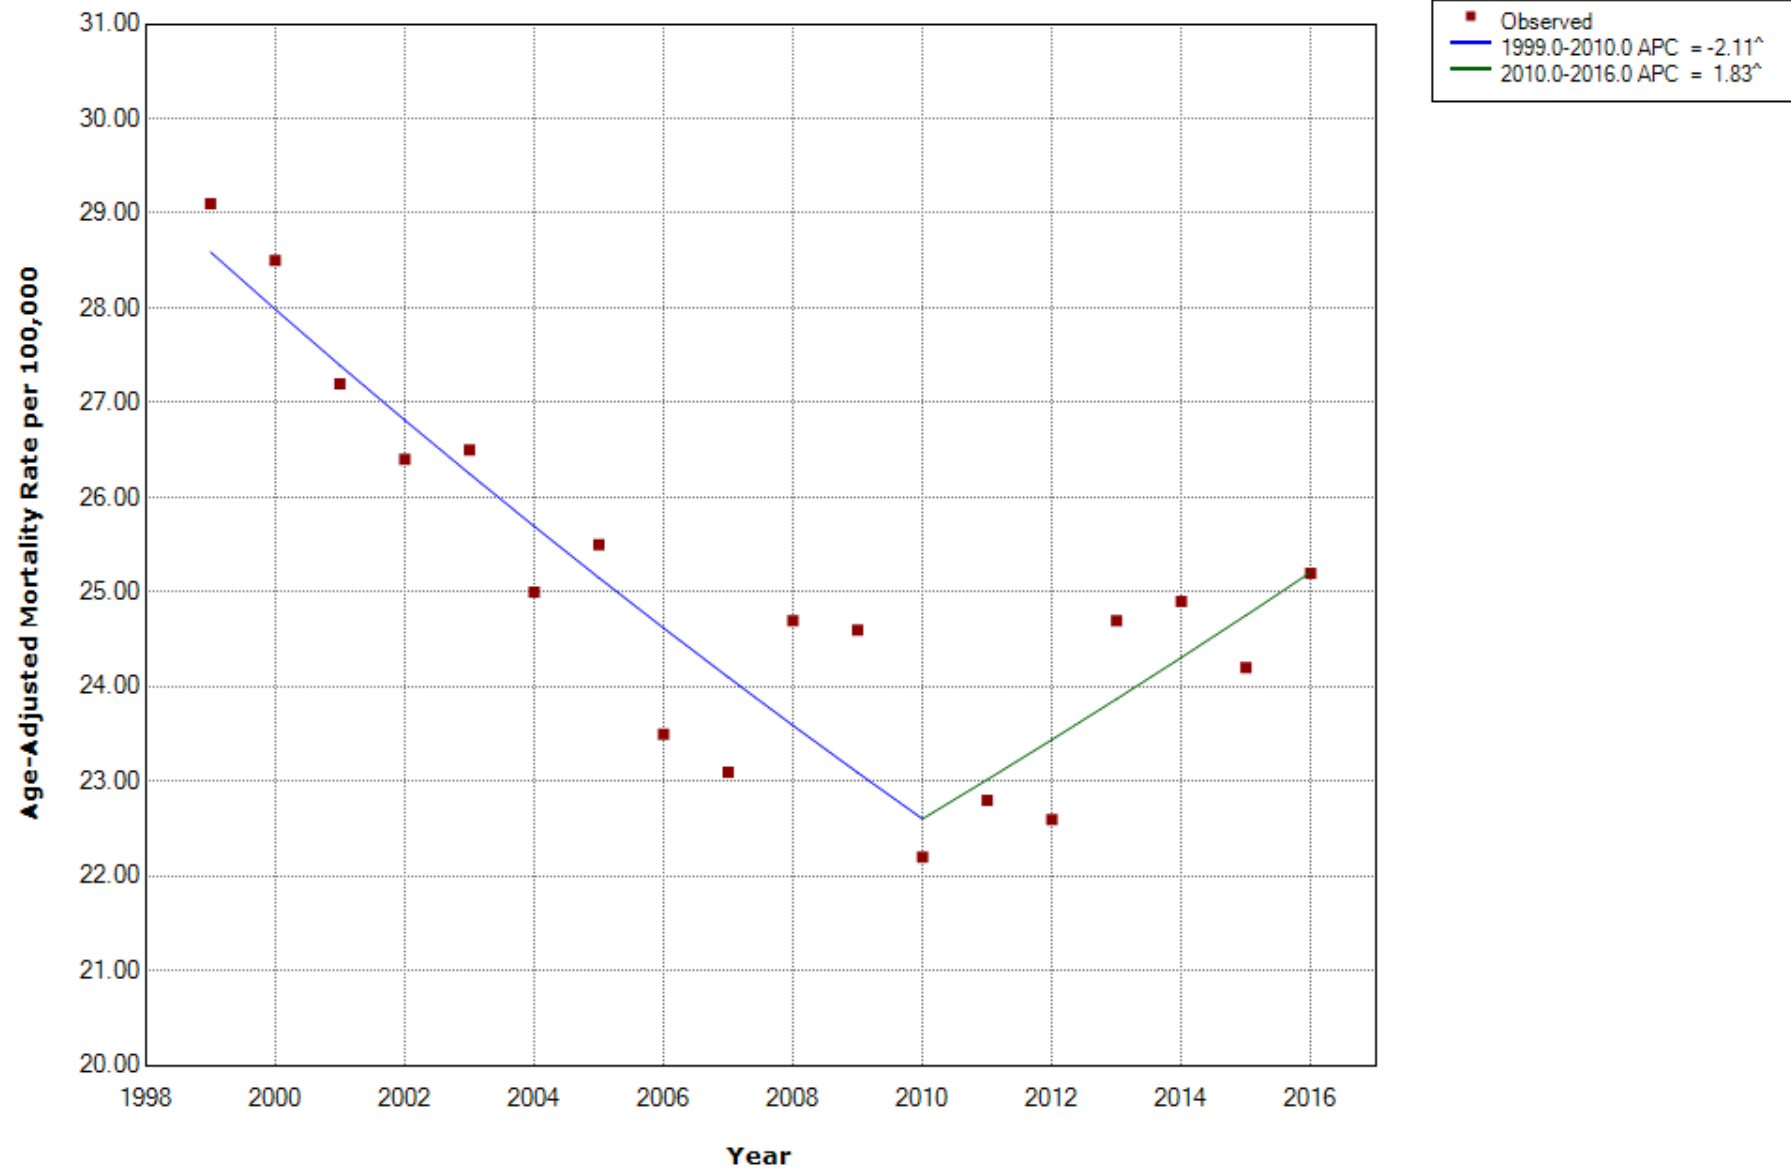

^ Indicates that the Annual Percent Change (APC) is significantly different from zero at the alpha = 0.05 level.  
Final Selected Model: 1 Joinpoint.

### Diseases of the respiratory system (J00-J98) / NH whites: 1 Joinpoint

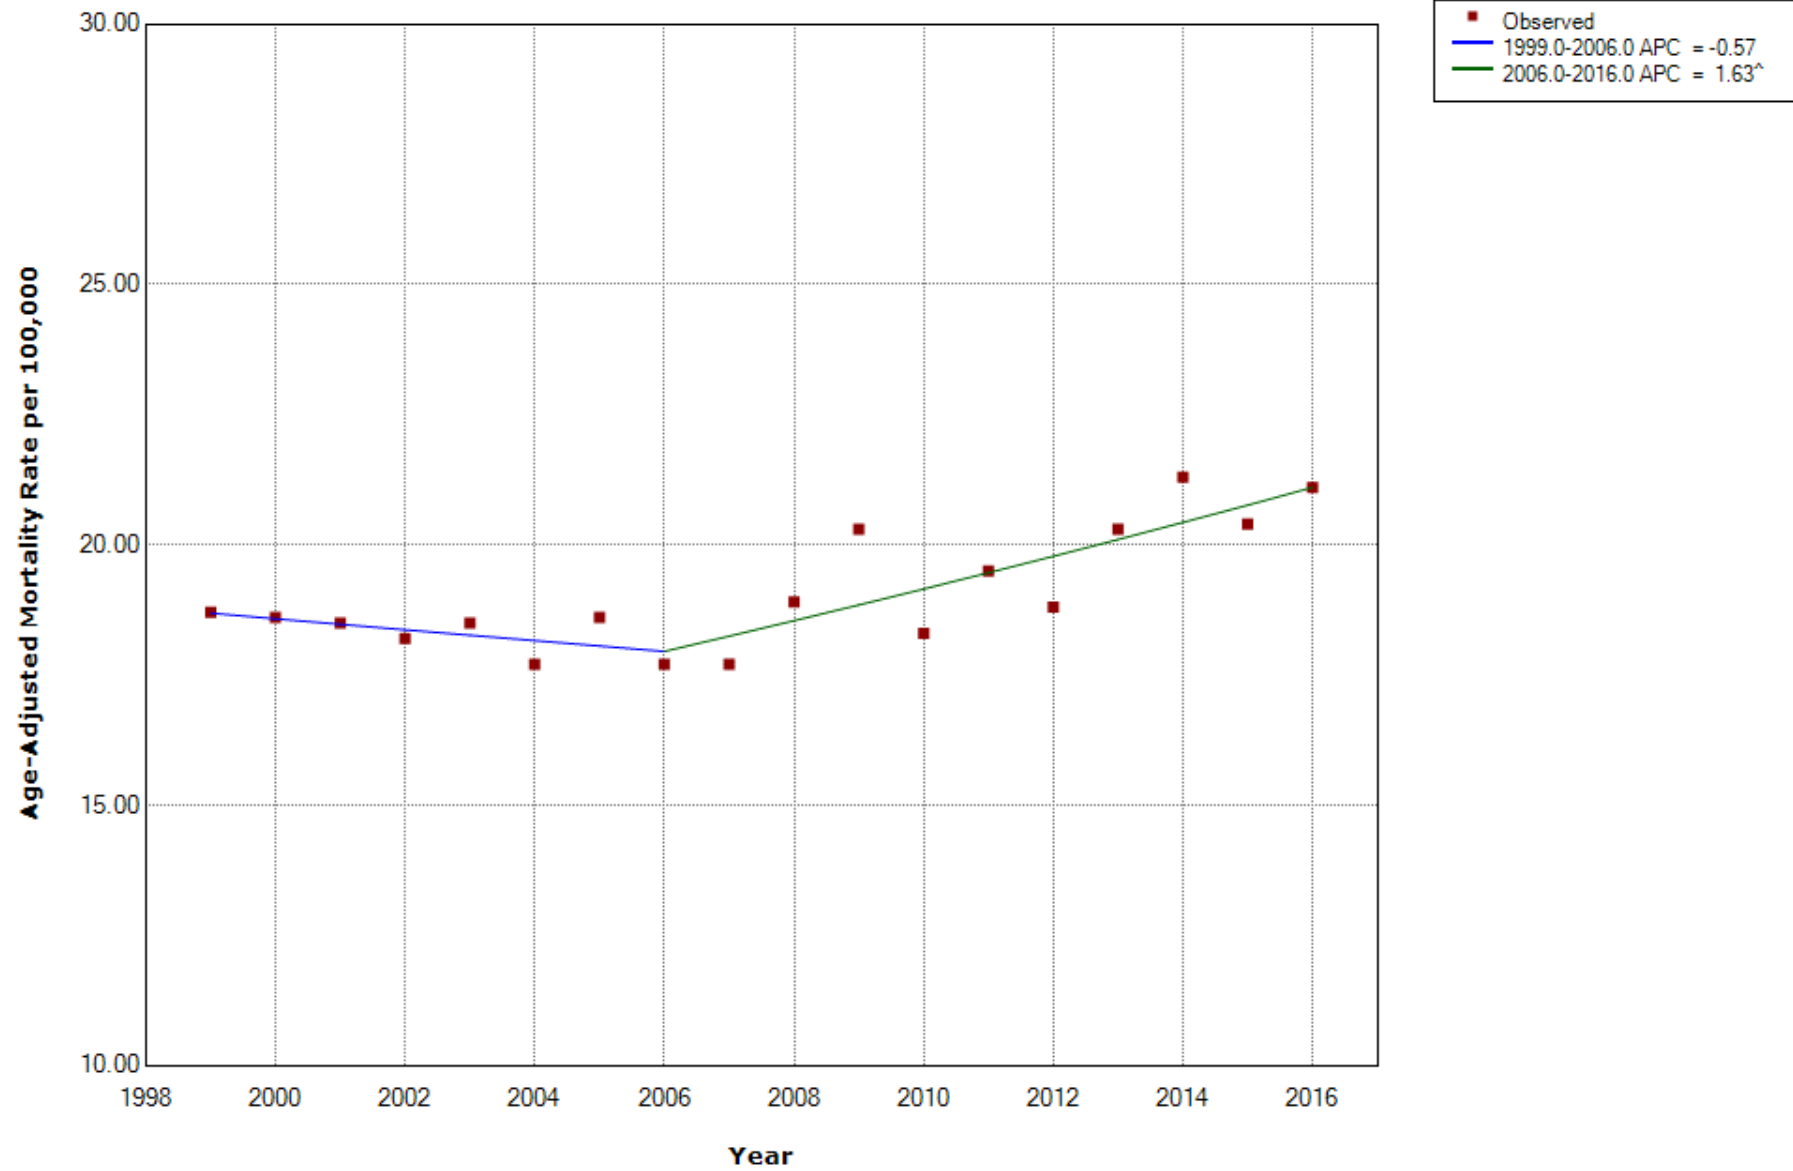

^ Indicates that the Annual Percent Change (APC) is significantly different from zero at the alpha = 0.05 level.  
Final Selected Model: 1 Joinpoint.

Diseases of the respiratory system (J00-J98) / Hispanics: 0 Joinpoints

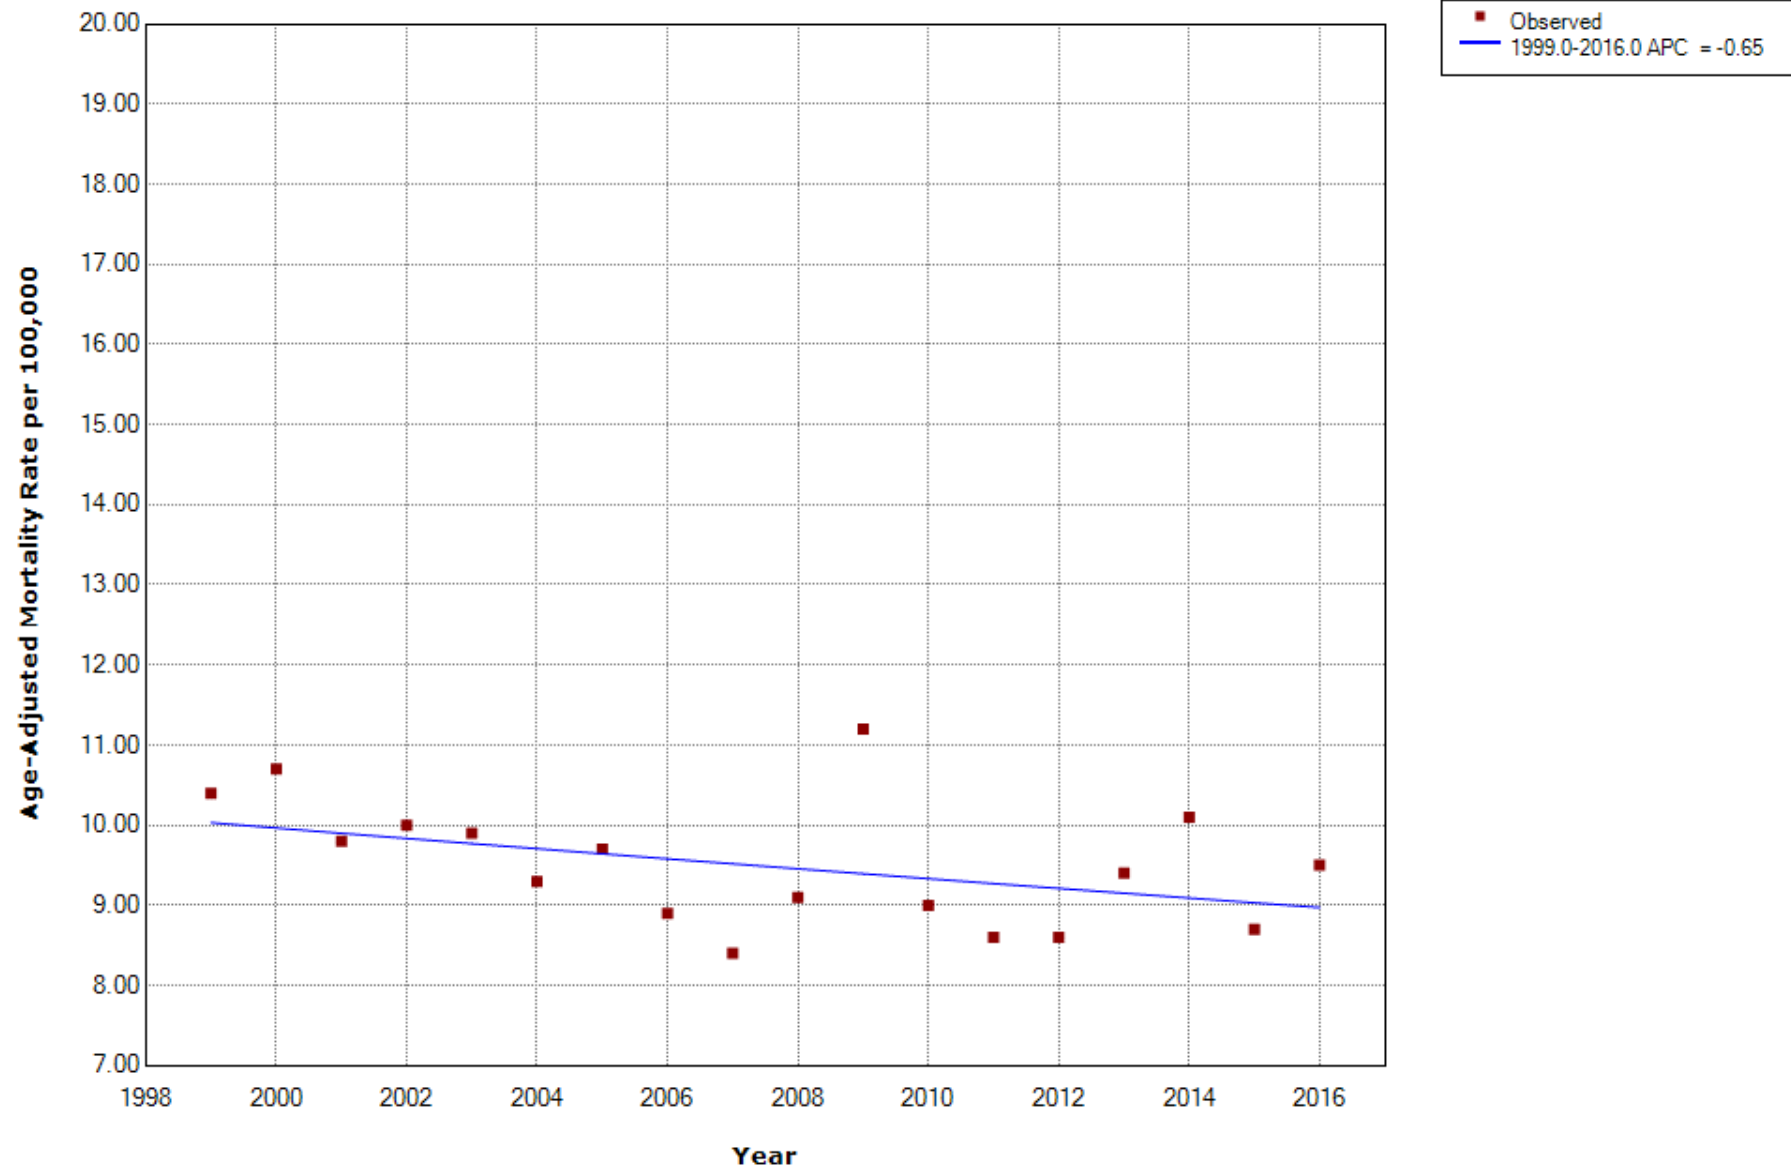

^ Indicates that the Annual Percent Change (APC) is significantly different from zero at the alpha = 0.05 level.  
Final Selected Model: 0 Joinpoints.

### Diseases of the digestive system (K00-K92) / NH AIAN: 1 Joinpoint

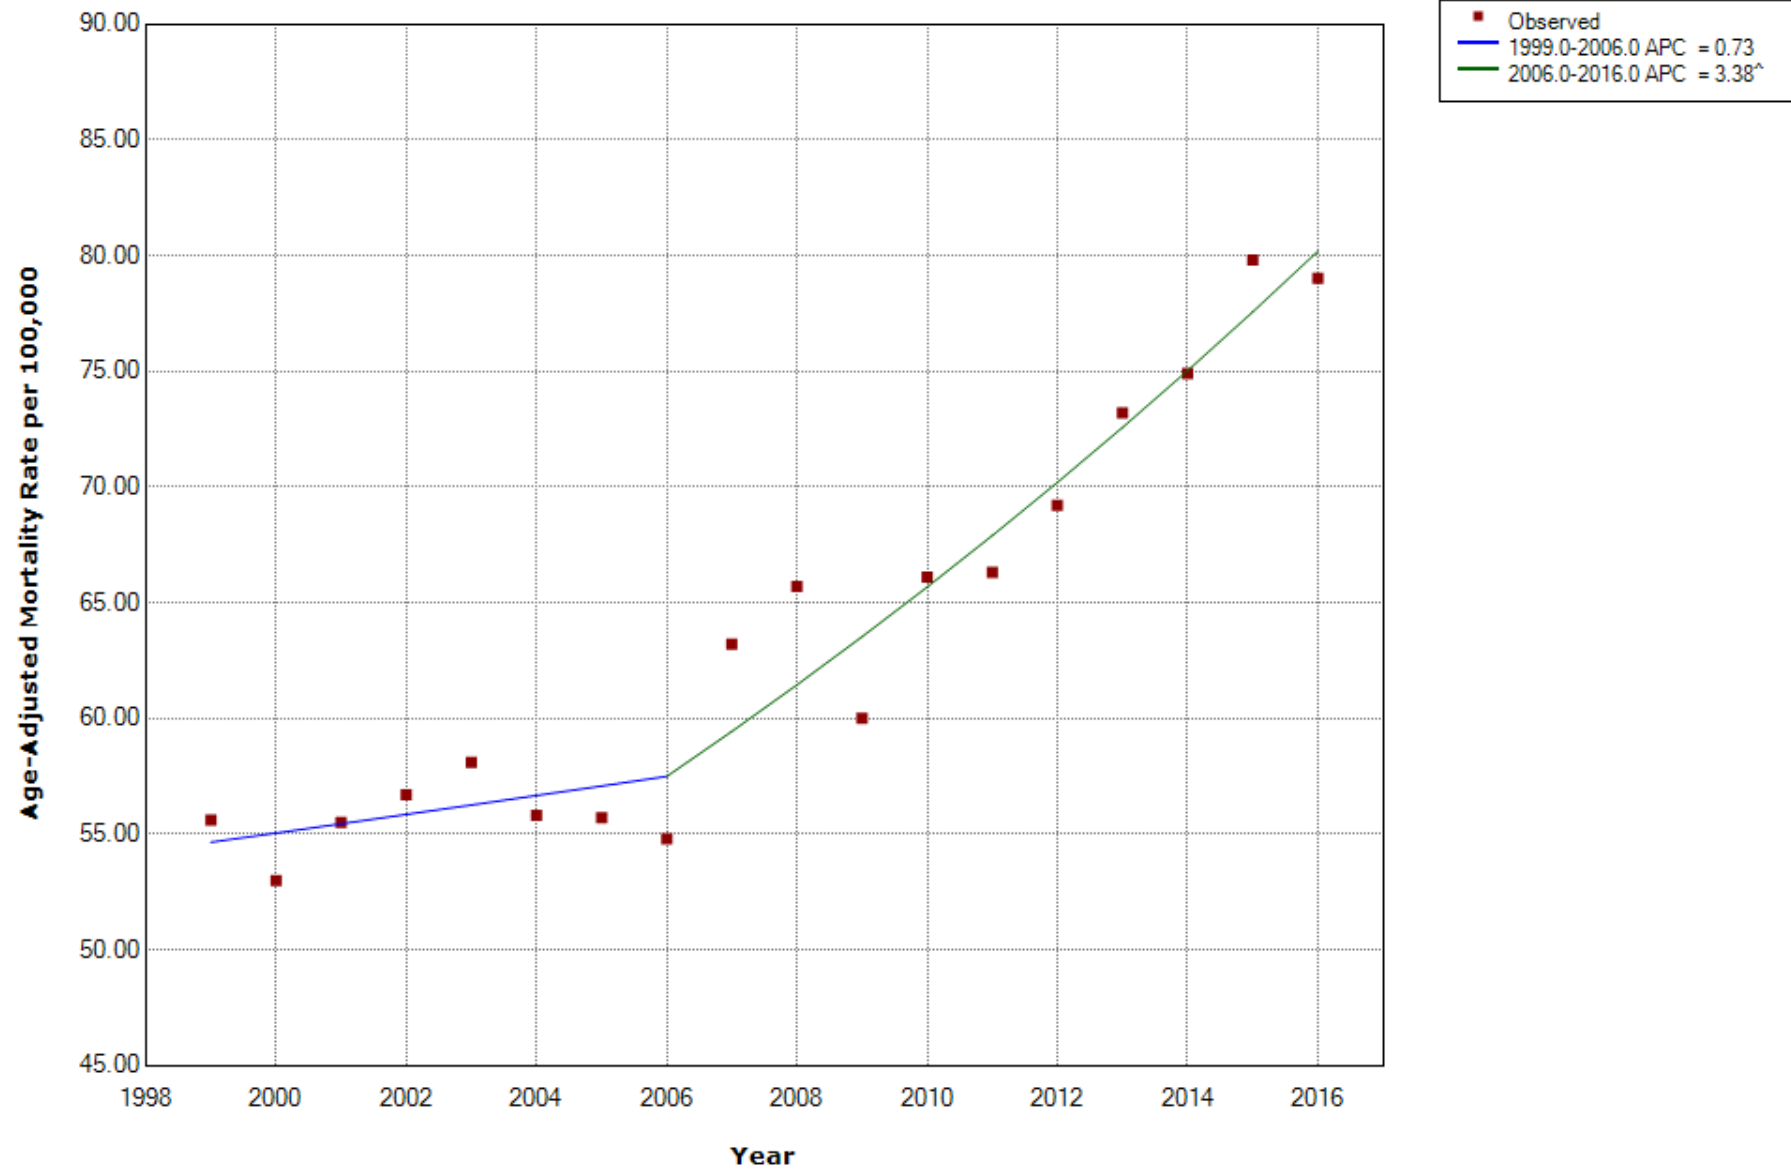

^ Indicates that the Annual Percent Change (APC) is significantly different from zero at the alpha = 0.05 level.  
Final Selected Model: 1 Joinpoint.

Diseases of the digestive system (K00-K92) / NH API: 0 Joinpoints

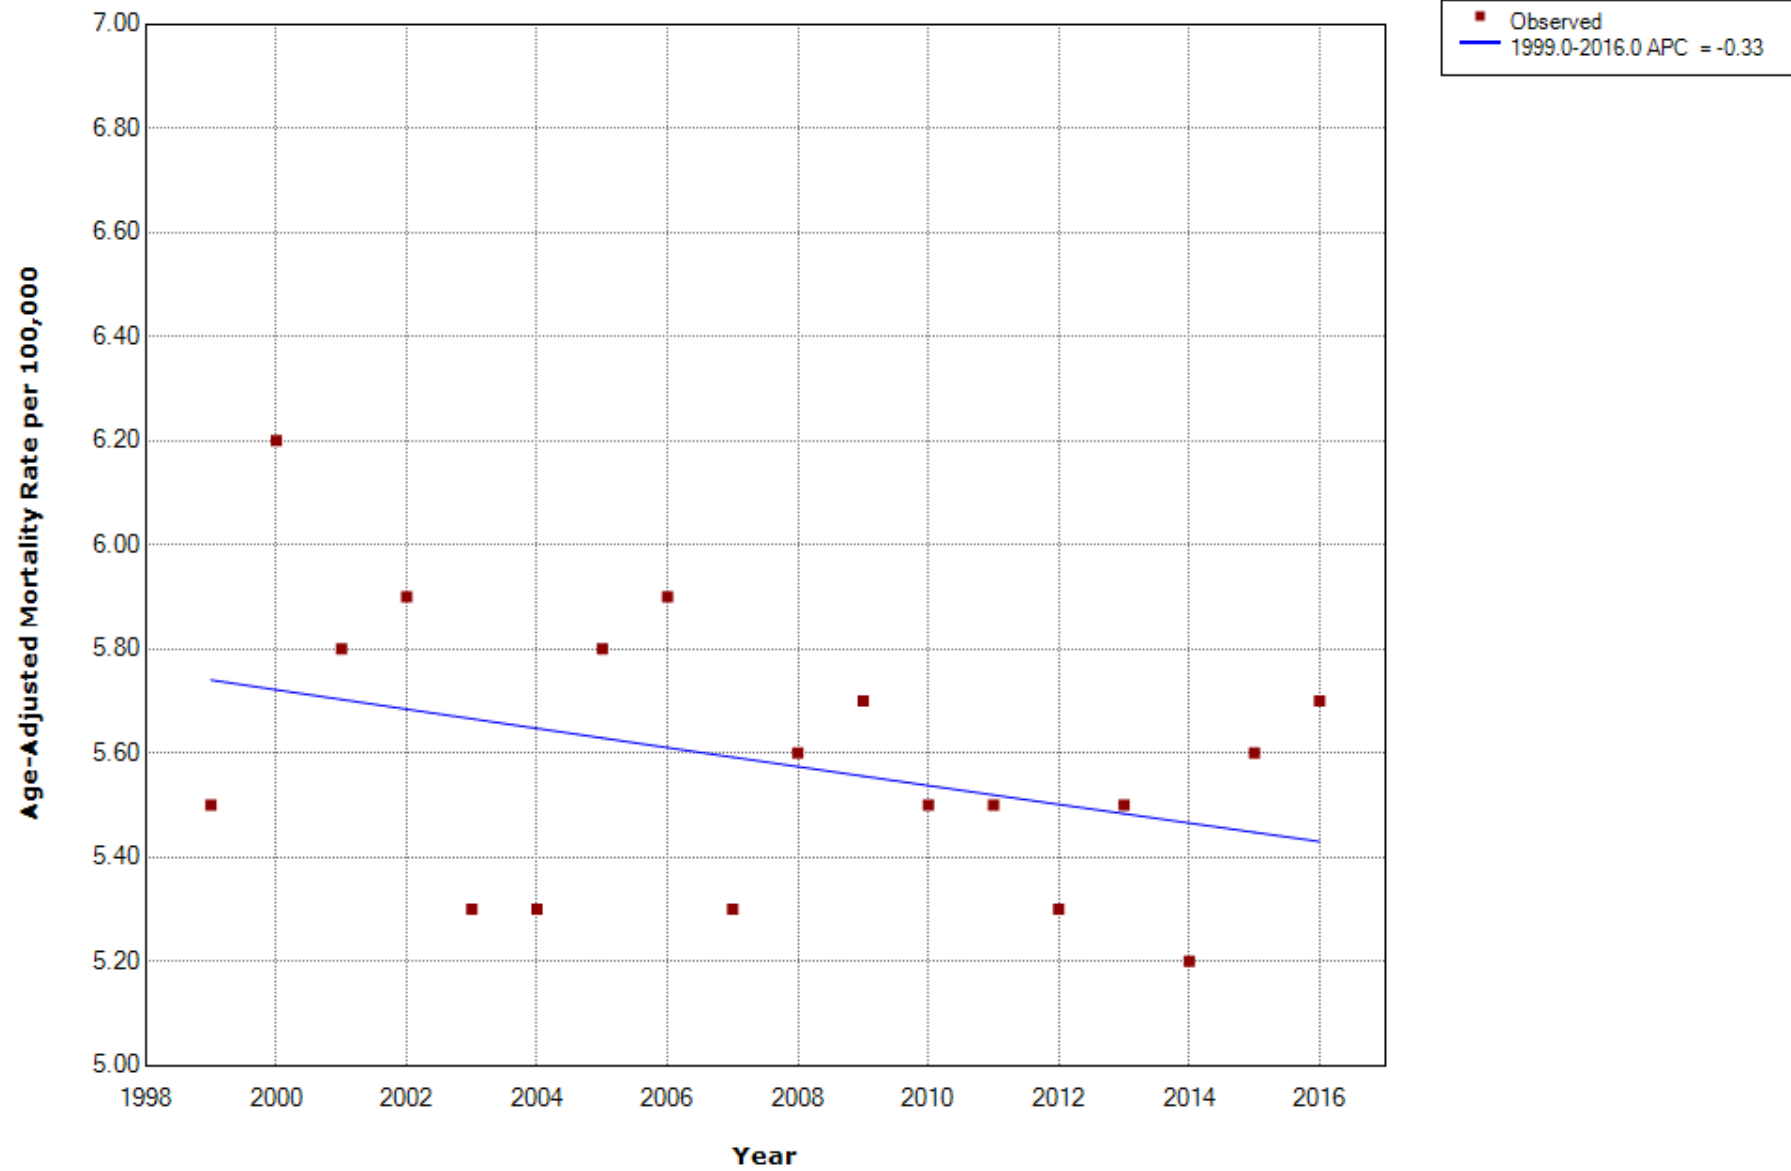

^ Indicates that the Annual Percent Change (APC) is significantly different from zero at the alpha = 0.05 level.  
Final Selected Model: 0 Joinpoints.



### Diseases of the digestive system (K00-K92) / NH Blacks: 1 Joinpoint

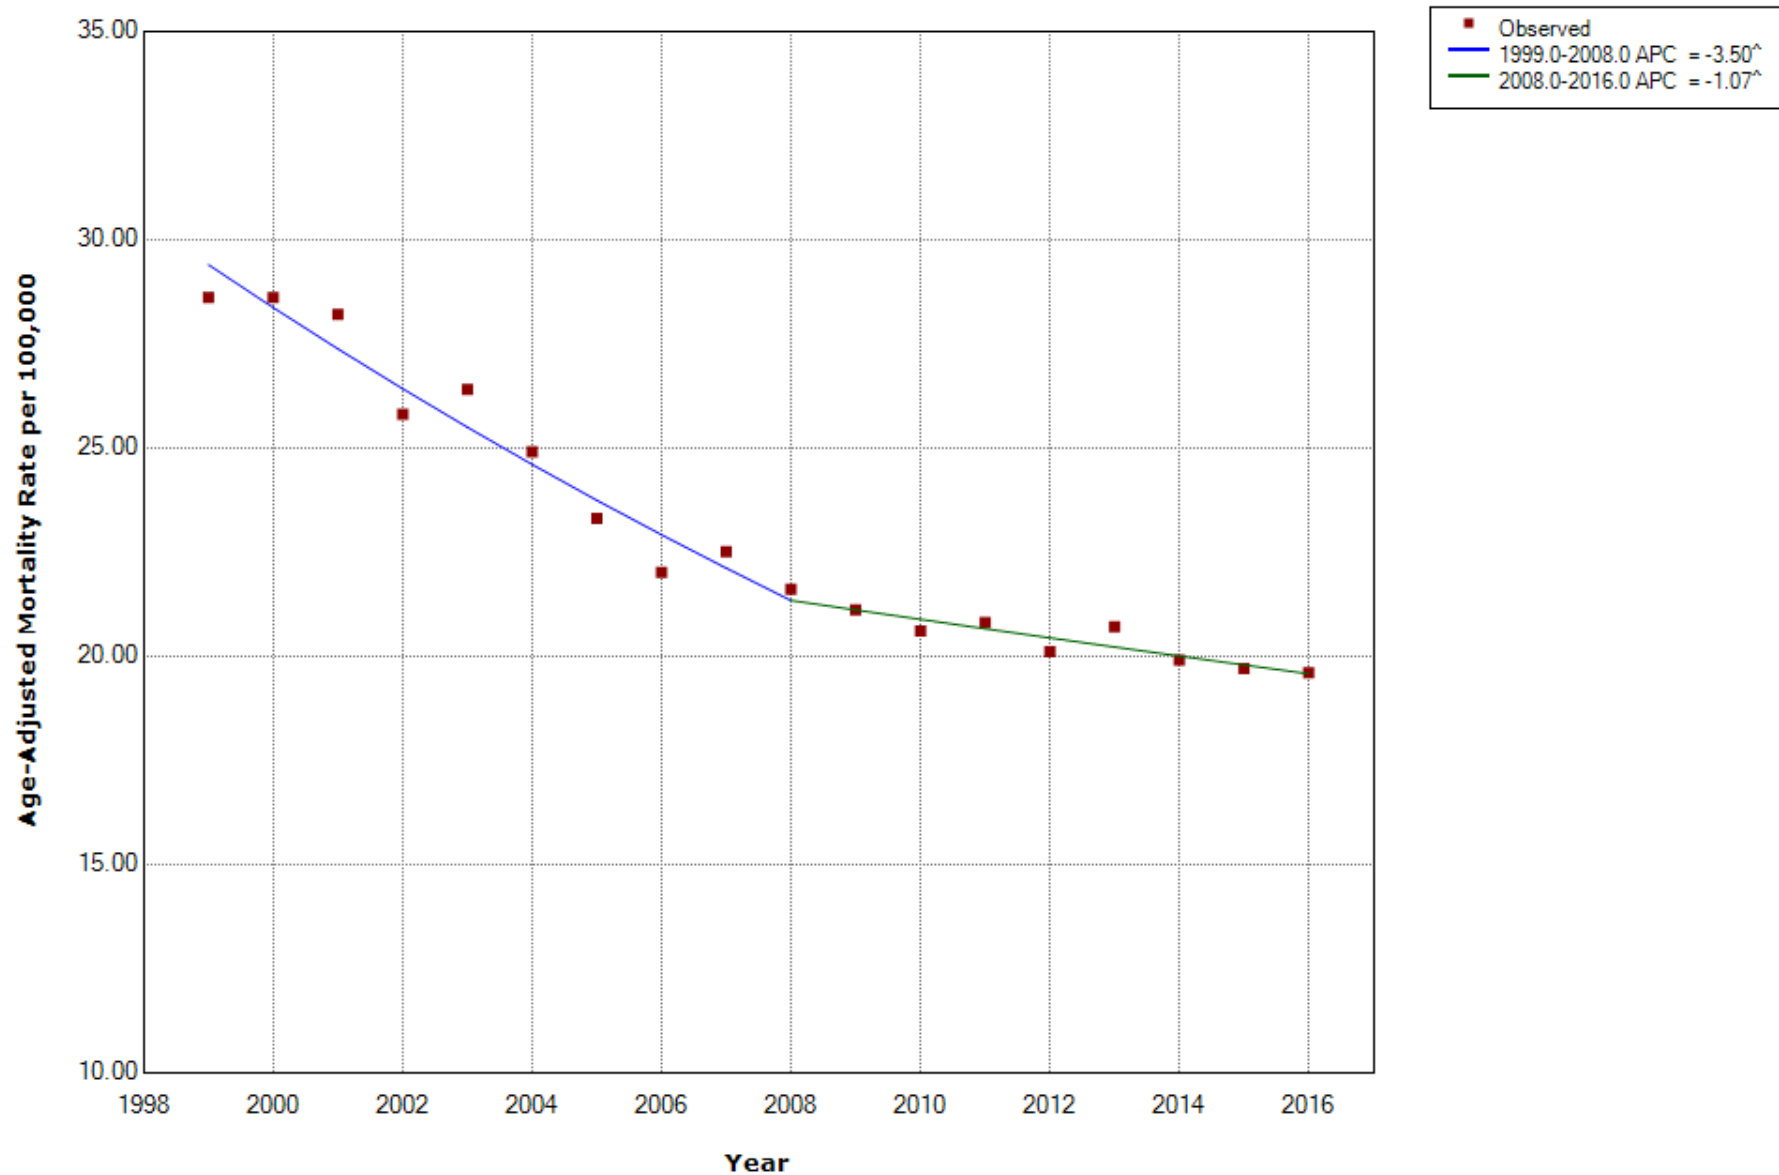

^ Indicates that the Annual Percent Change (APC) is significantly different from zero at the alpha = 0.05 level.  
Final Selected Model: 1 Joinpoint.

### Diseases of the digestive system (K00-K92) / NH whites: 2 Joinpoints

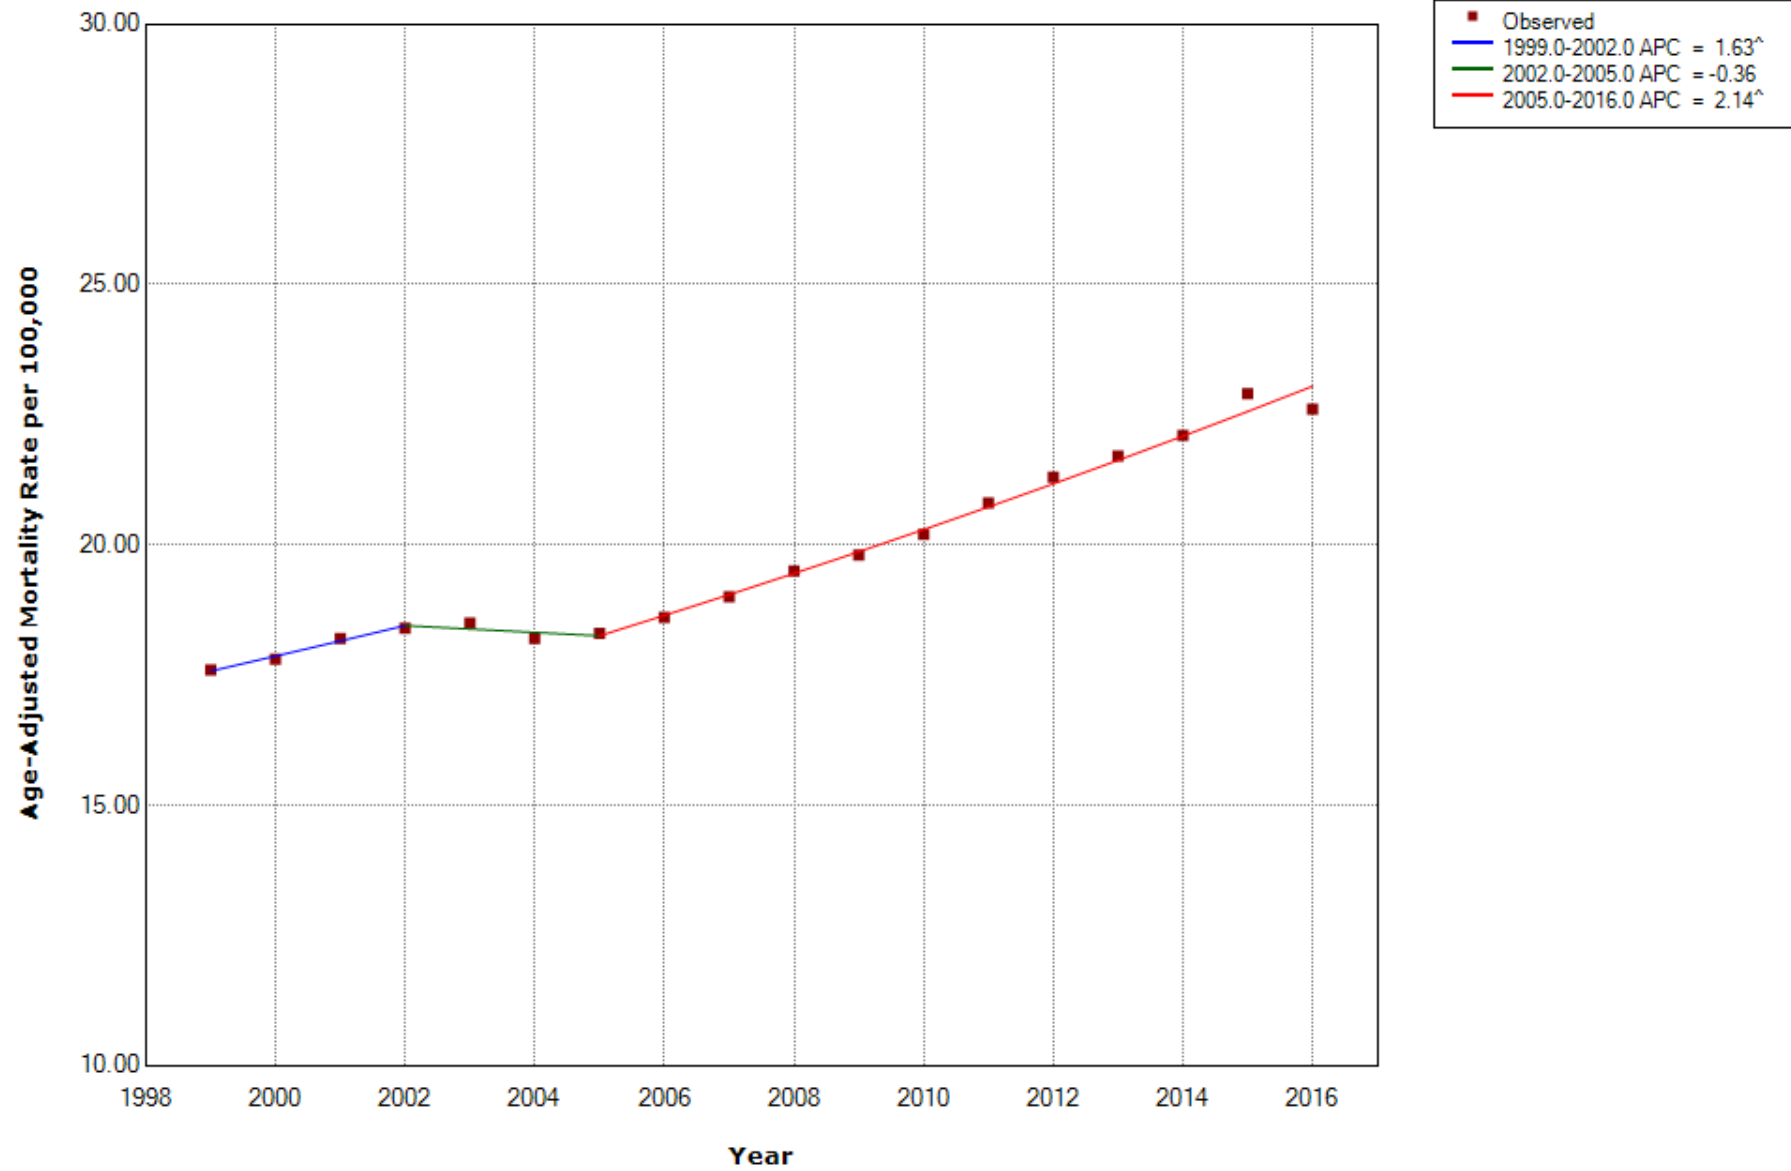

^ Indicates that the Annual Percent Change (APC) is significantly different from zero at the alpha = 0.05 level.  
Final Selected Model: 2 Joinpoints.

### Diseases of the digestive system (K00-K92) / Hispanics: 1 Joinpoint

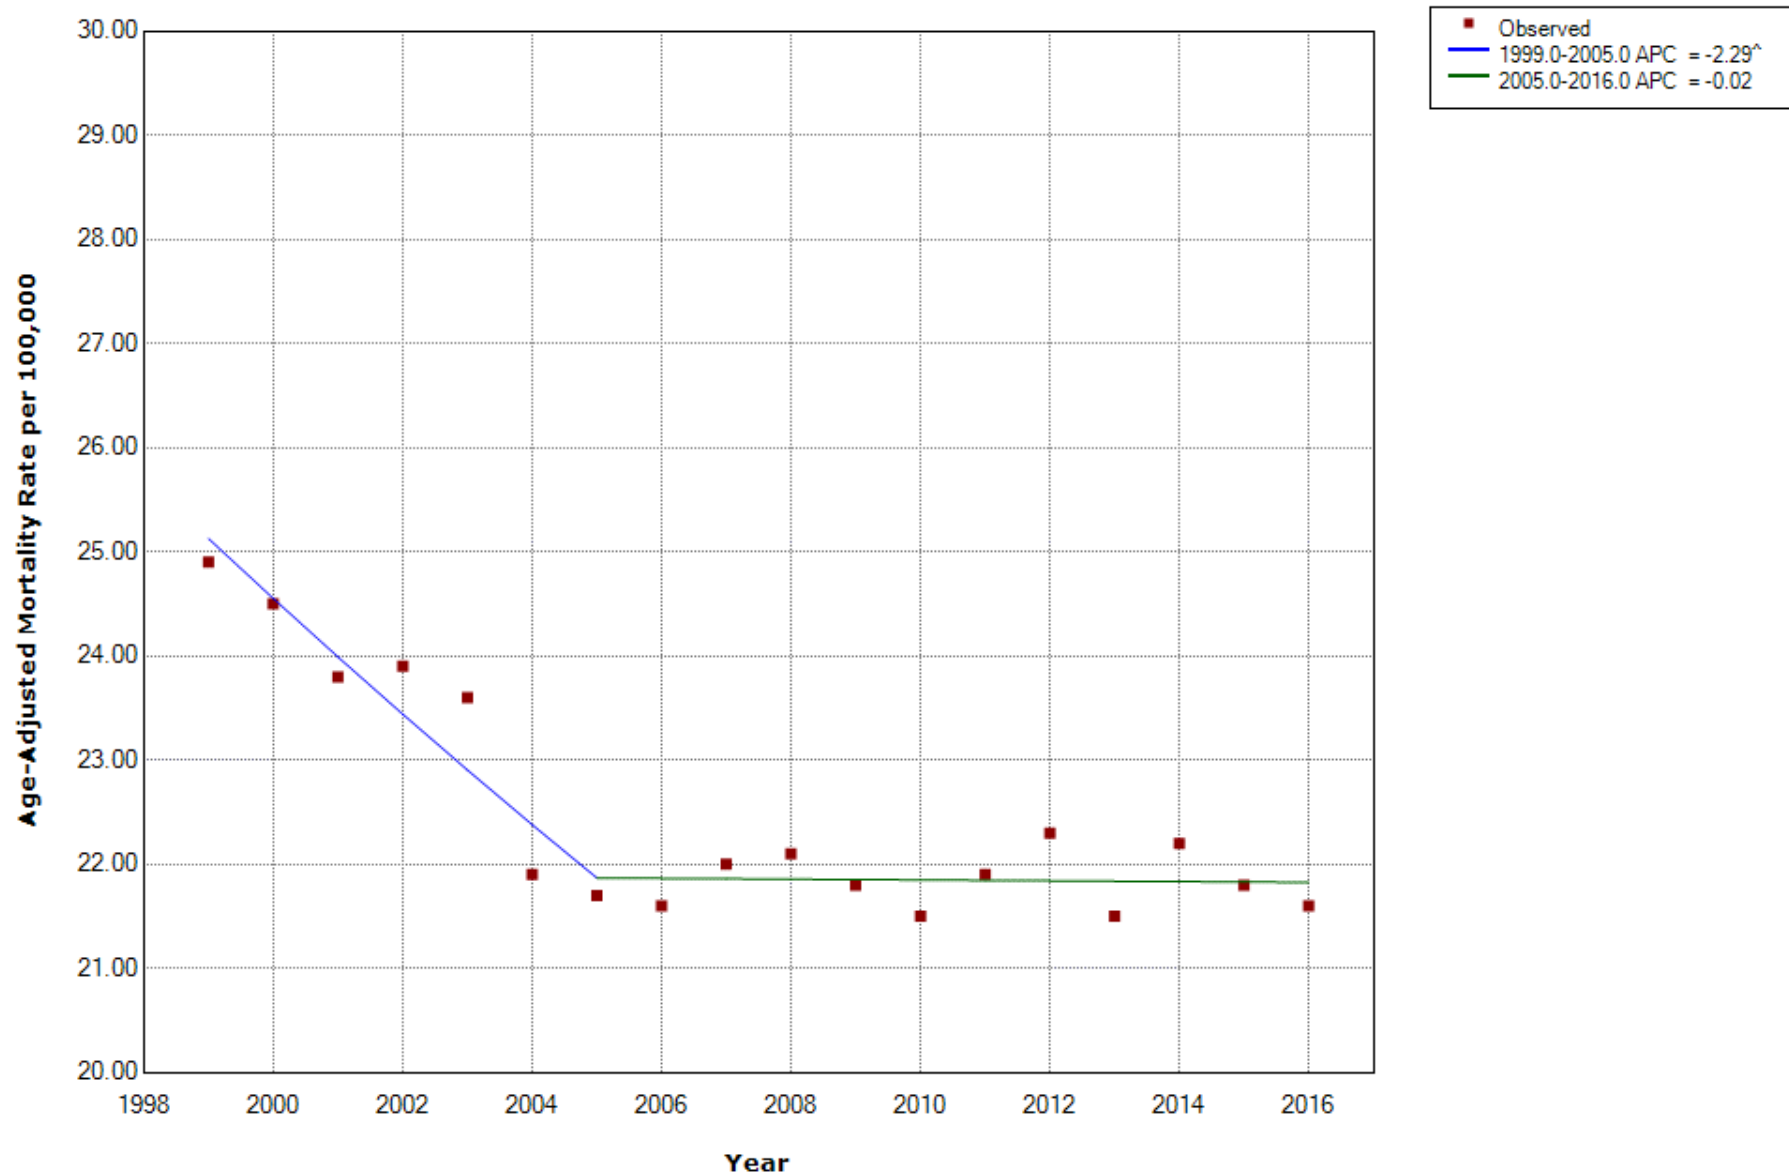

^ Indicates that the Annual Percent Change (APC) is significantly different from zero at the alpha = 0.05 level.  
Final Selected Model: 1 Joinpoint.

Endocrine, nutritional and metabolic diseases (E00-E88) / NH AIAN: 0 Joinpoints

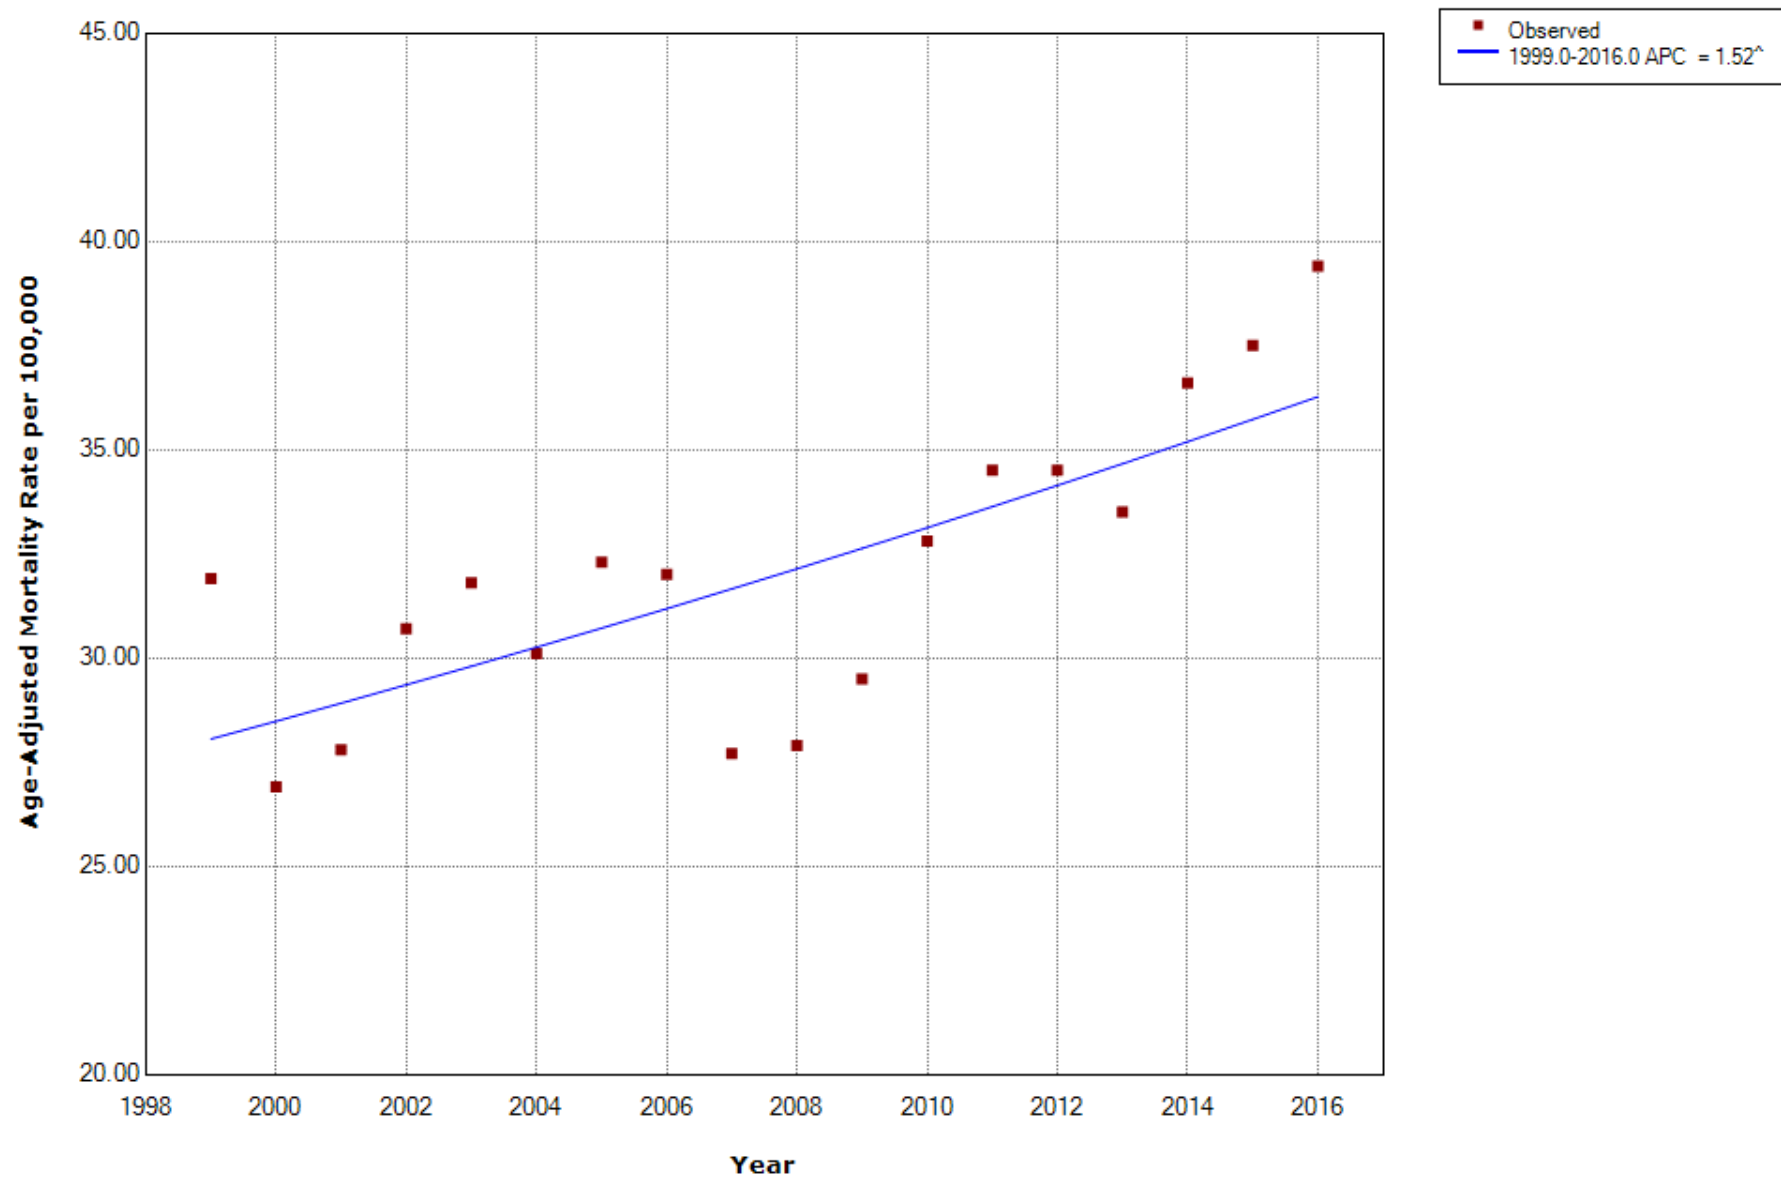

^ Indicates that the Annual Percent Change (APC) is significantly different from zero at the alpha = 0.05 level.  
Final Selected Model: 0 Joinpoints.

Endocrine, nutritional and metabolic diseases (E00-E88) / NH API: 0 Joinpoints

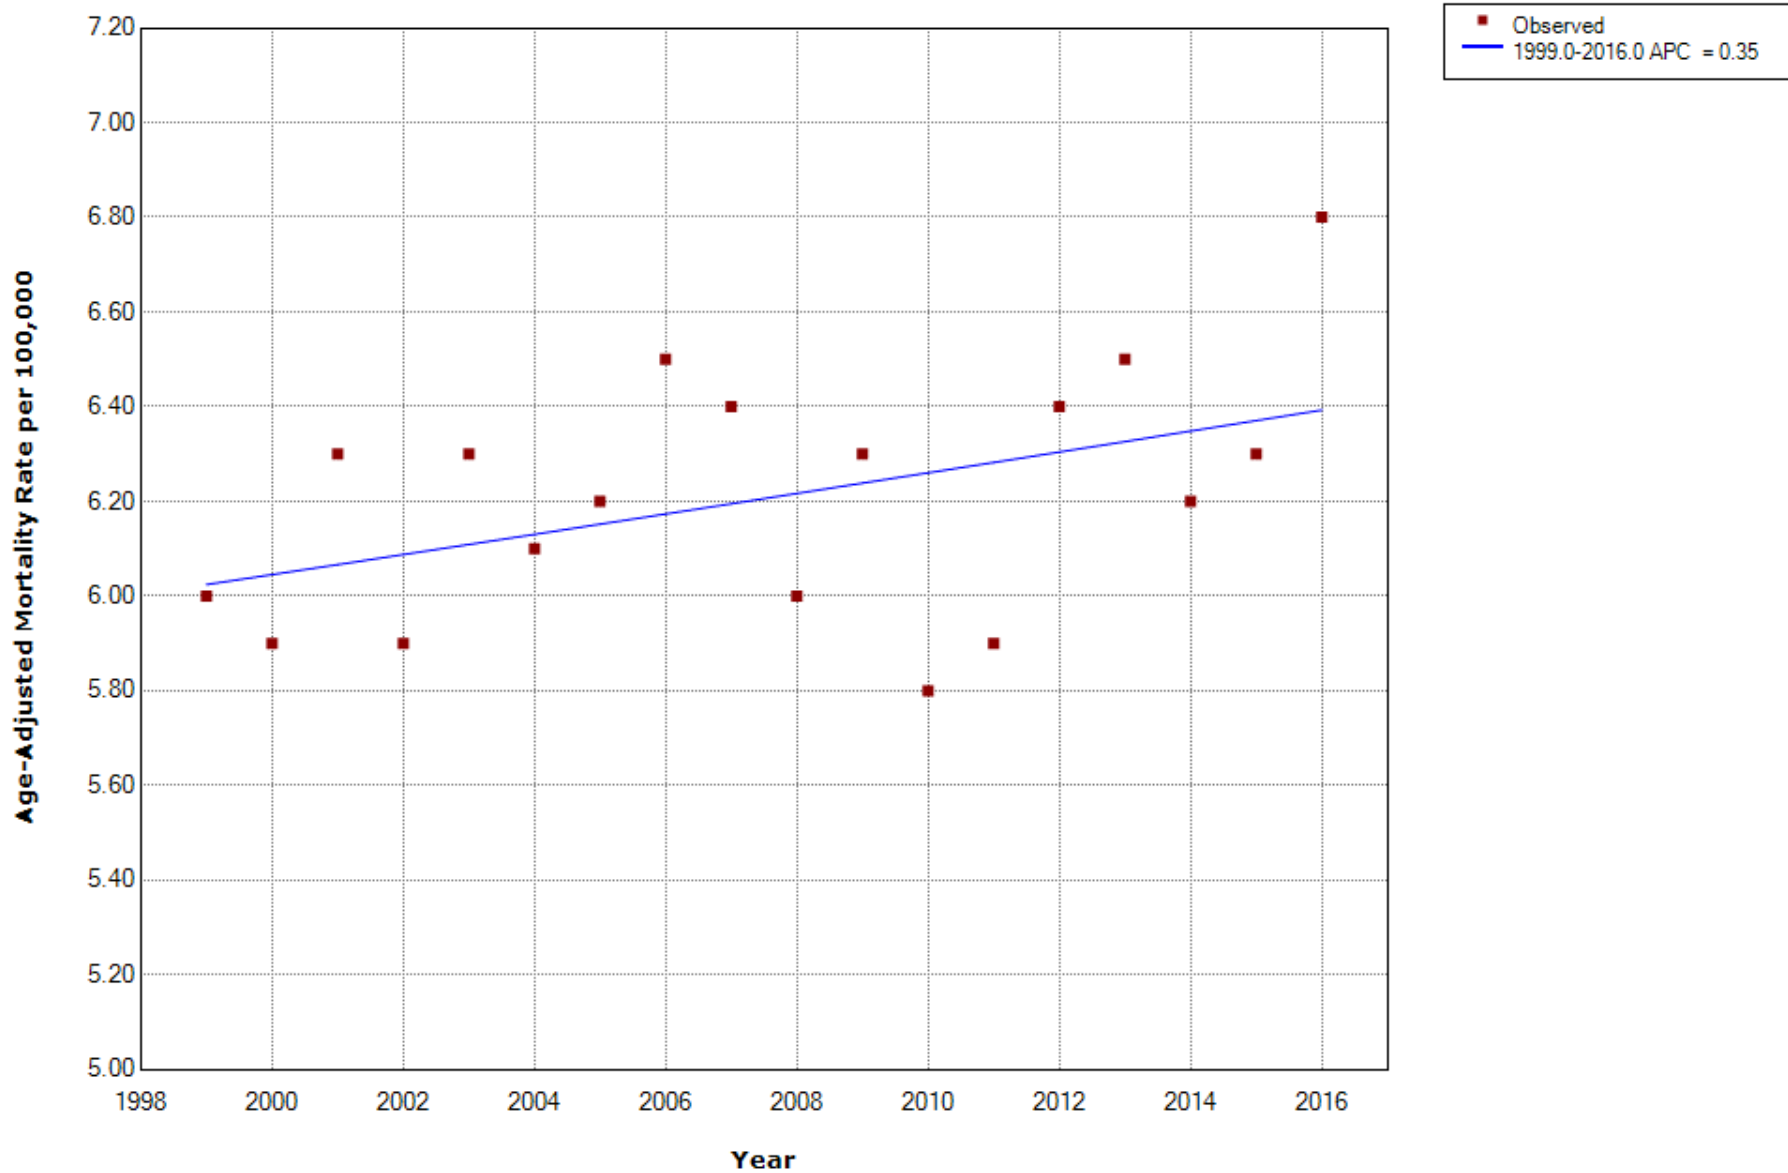

^ Indicates that the Annual Percent Change (APC) is significantly different from zero at the alpha = 0.05 level.  
Final Selected Model: 0 Joinpoints.

### Endocrine, nutritional and metabolic diseases (E00-E88) / NH Blacks: 2 Joinpoints

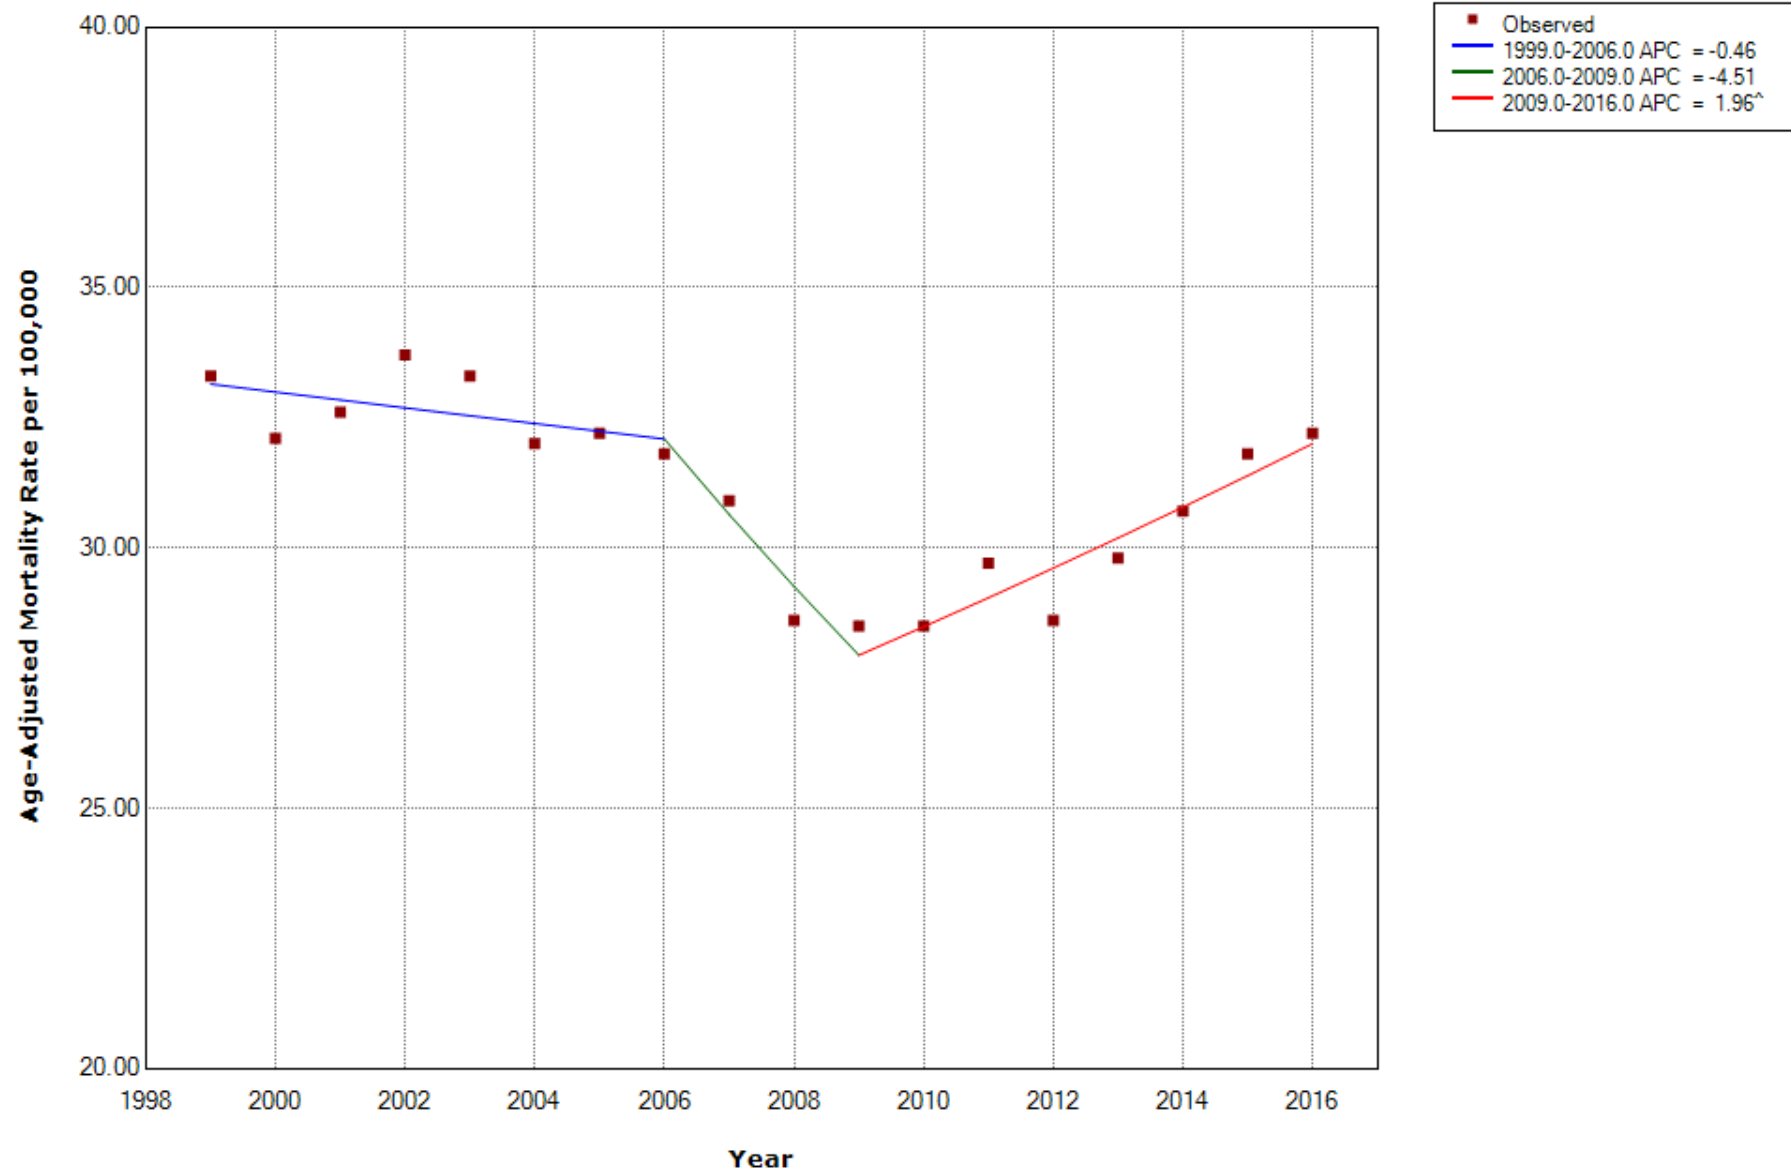

<sup>^</sup> Indicates that the Annual Percent Change (APC) is significantly different from zero at the alpha = 0.05 level.  
Final Selected Model: 2 Joinpoints.

### Endocrine, nutritional and metabolic diseases (E00-E88) / NH whites: 2 Joinpoints

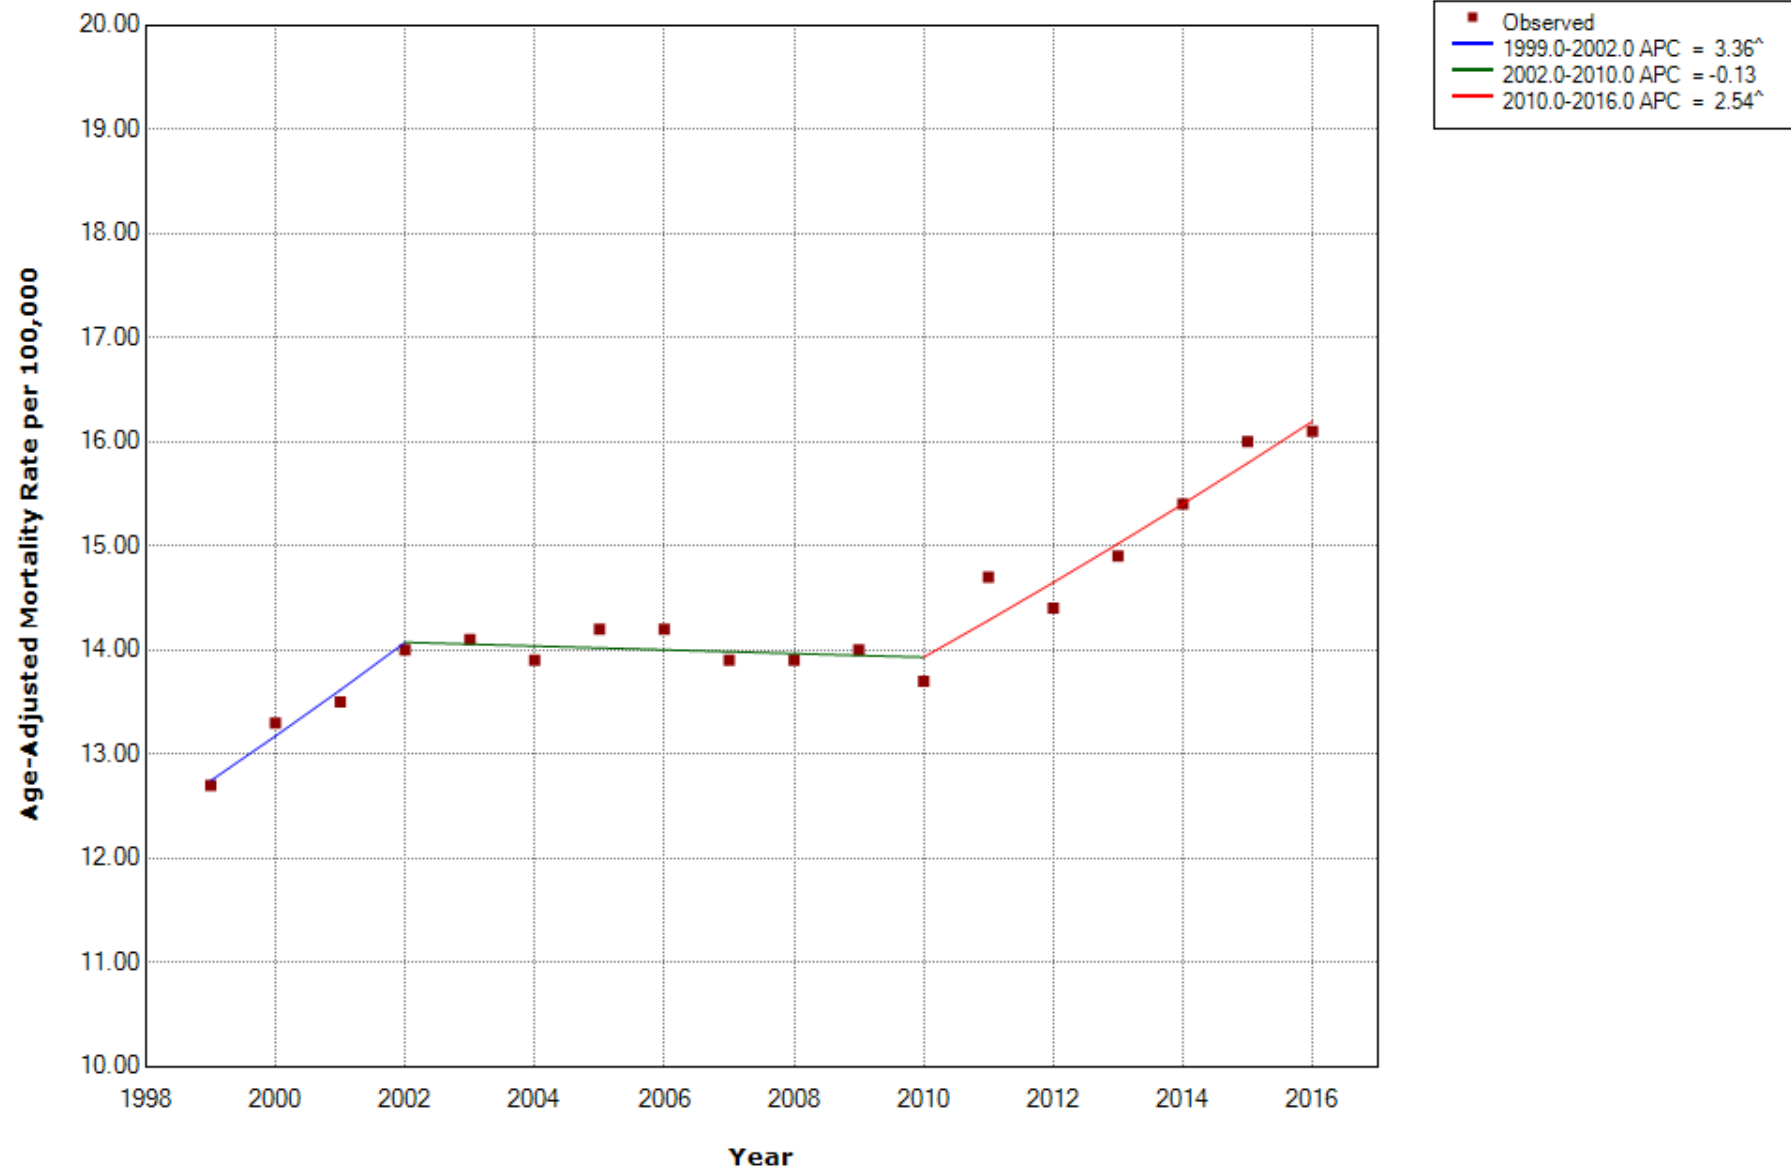

^ Indicates that the Annual Percent Change (APC) is significantly different from zero at the alpha = 0.05 level.  
Final Selected Model: 2 Joinpoints.

### Endocrine, nutritional and metabolic diseases (E00-E88) / Hispanics: 1 Joinpoint

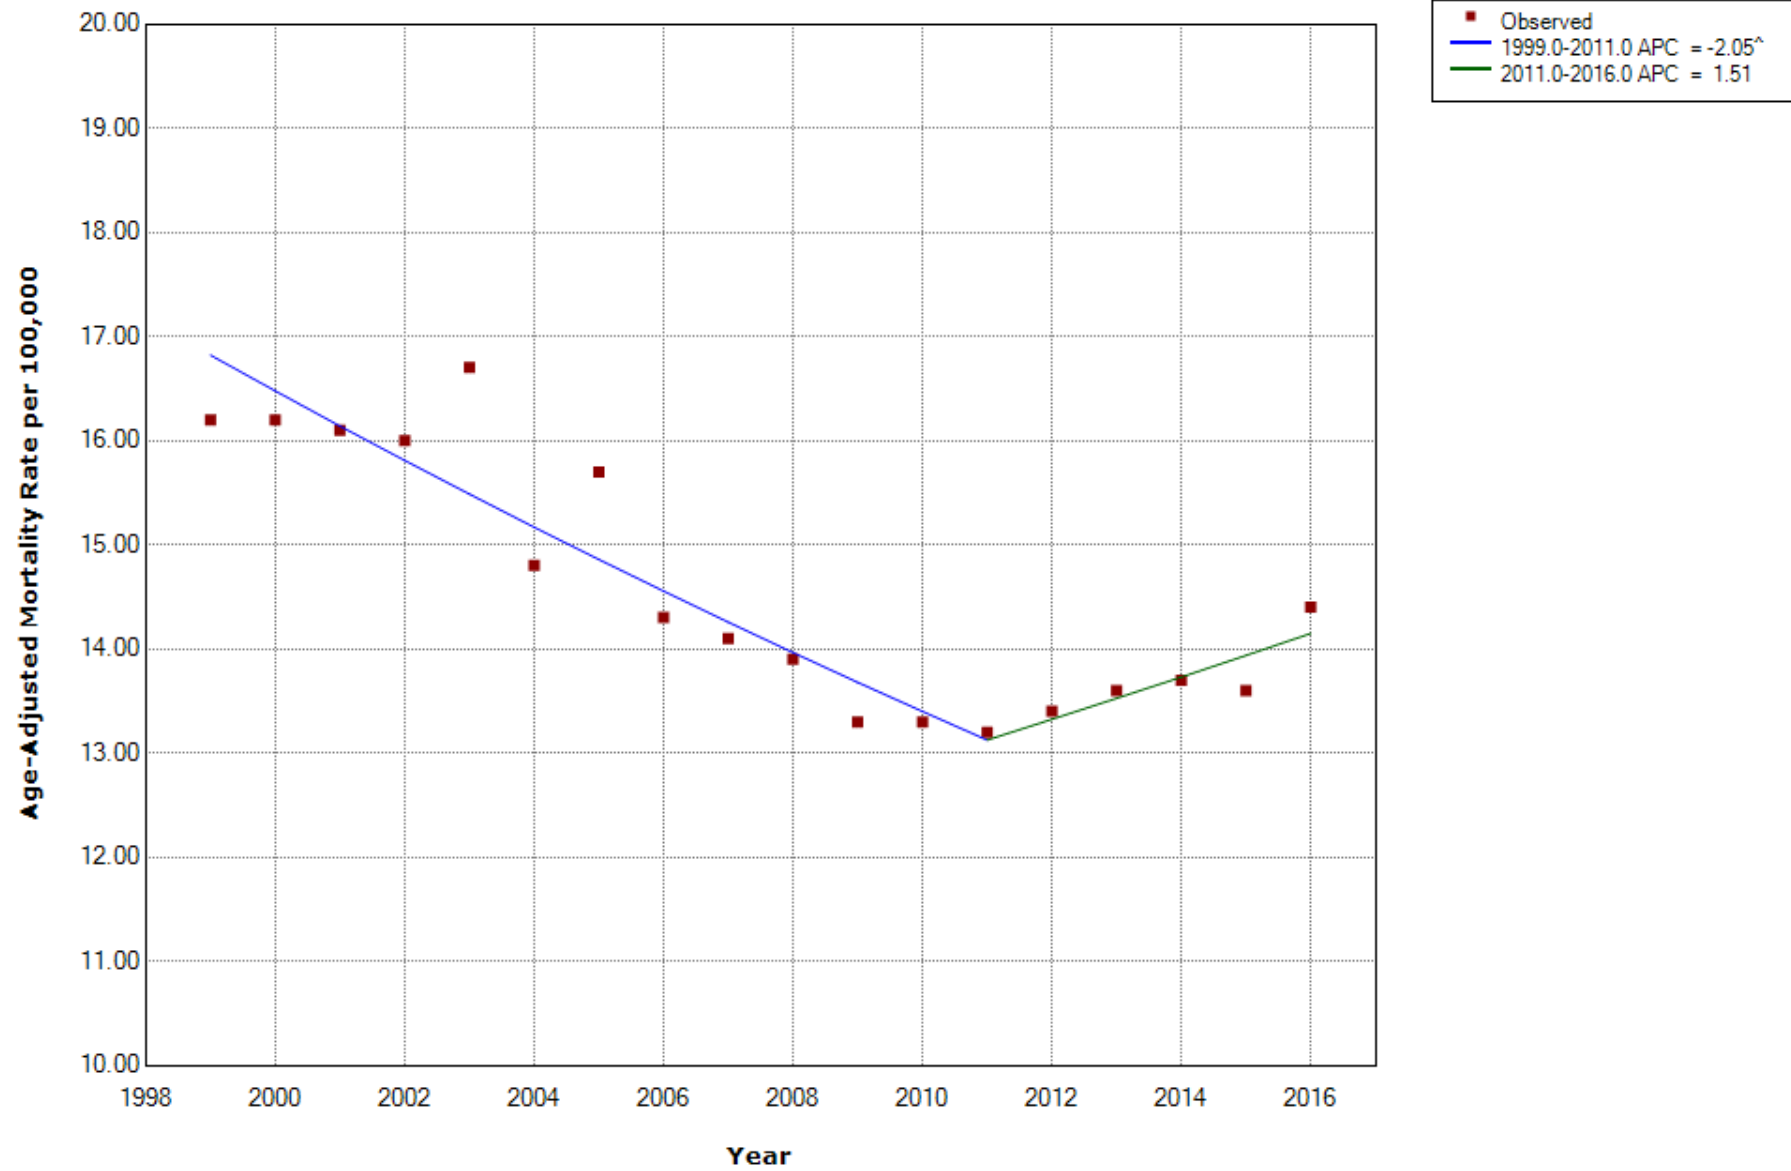

^ Indicates that the Annual Percent Change (APC) is significantly different from zero at the alpha = 0.05 level.  
Final Selected Model: 1 Joinpoint.



### Mental and behavioral disorders (F01-F99) / NH AIAN: 2 Joinpoints

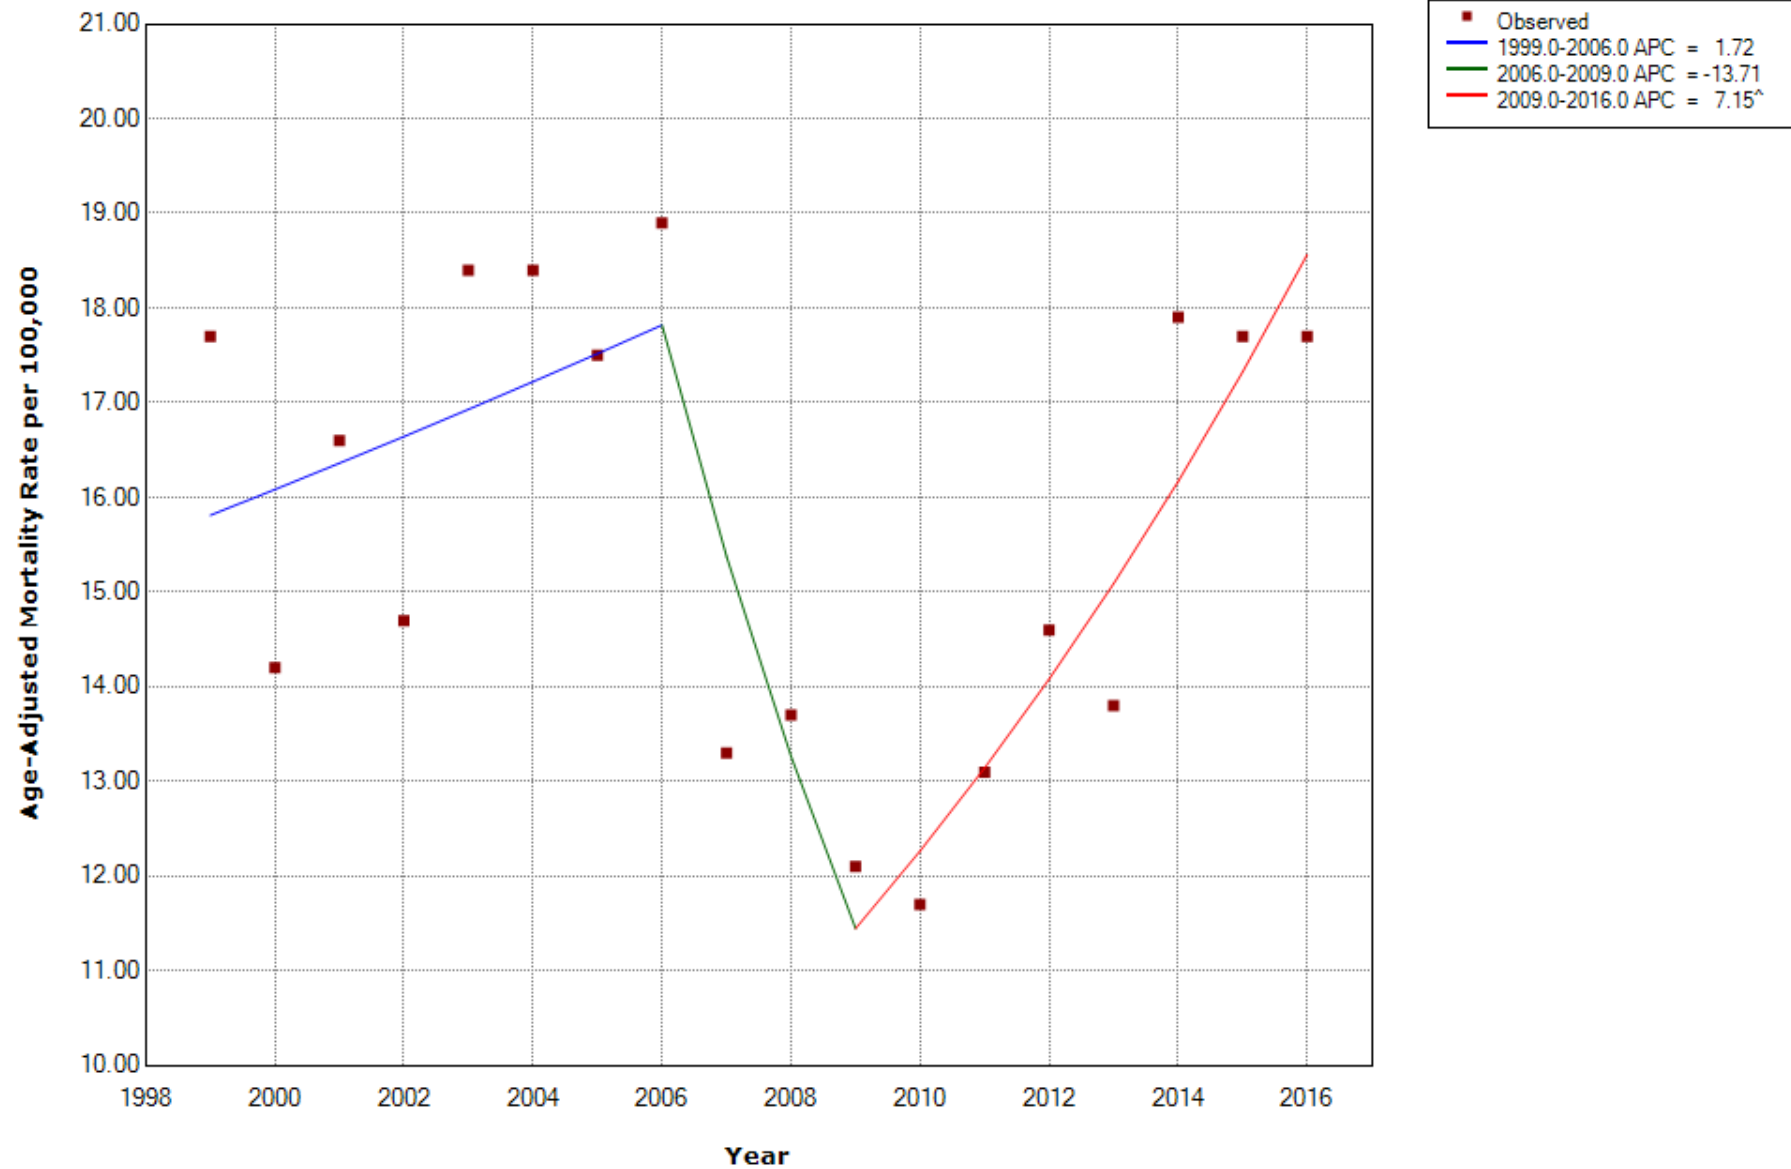

<sup>^</sup> Indicates that the Annual Percent Change (APC) is significantly different from zero at the alpha = 0.05 level.  
Final Selected Model: 2 Joinpoints.

### Mental and behavioral disorders (F01-F99) / NH API: 1 Joinpoint

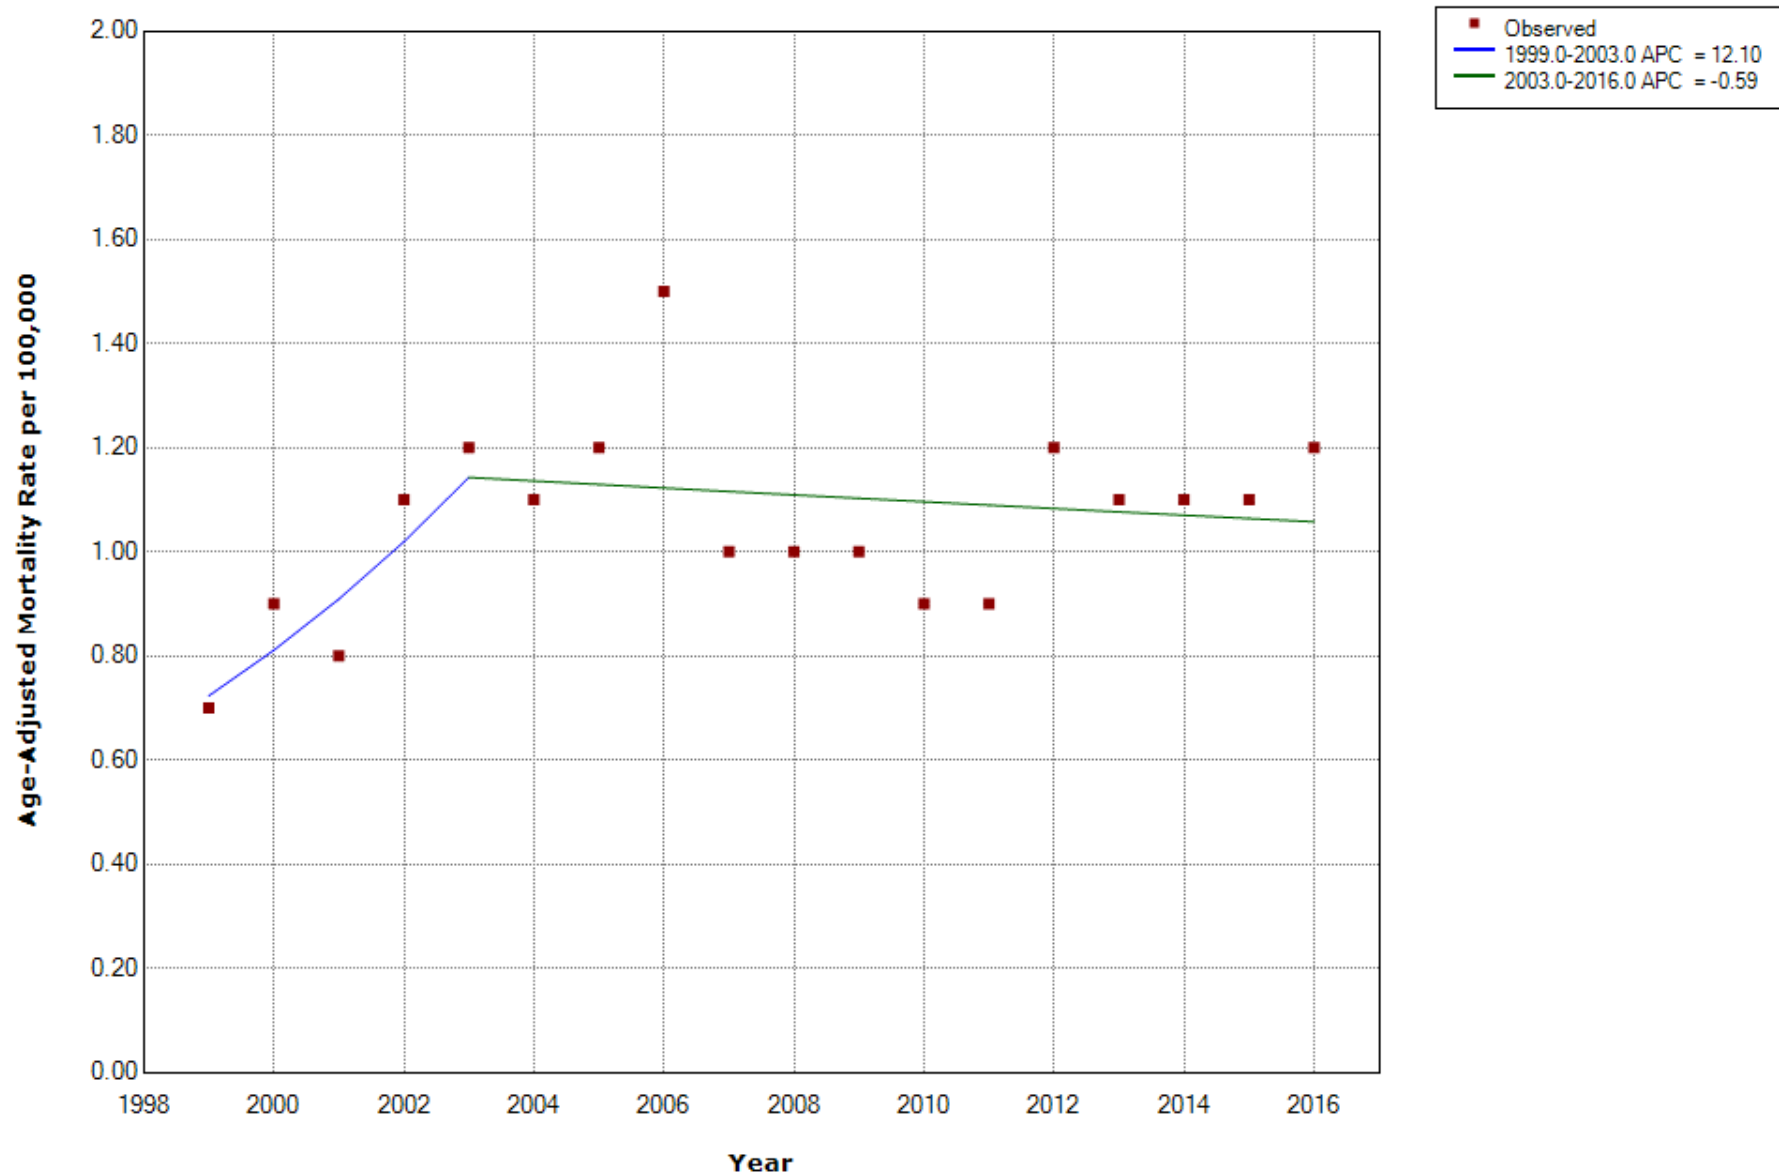

^ Indicates that the Annual Percent Change (APC) is significantly different from zero at the alpha = 0.05 level.  
Final Selected Model: 1 Joinpoint.

### Mental and behavioral disorders (F01-F99) / NH Blacks: 2 Joinpoints

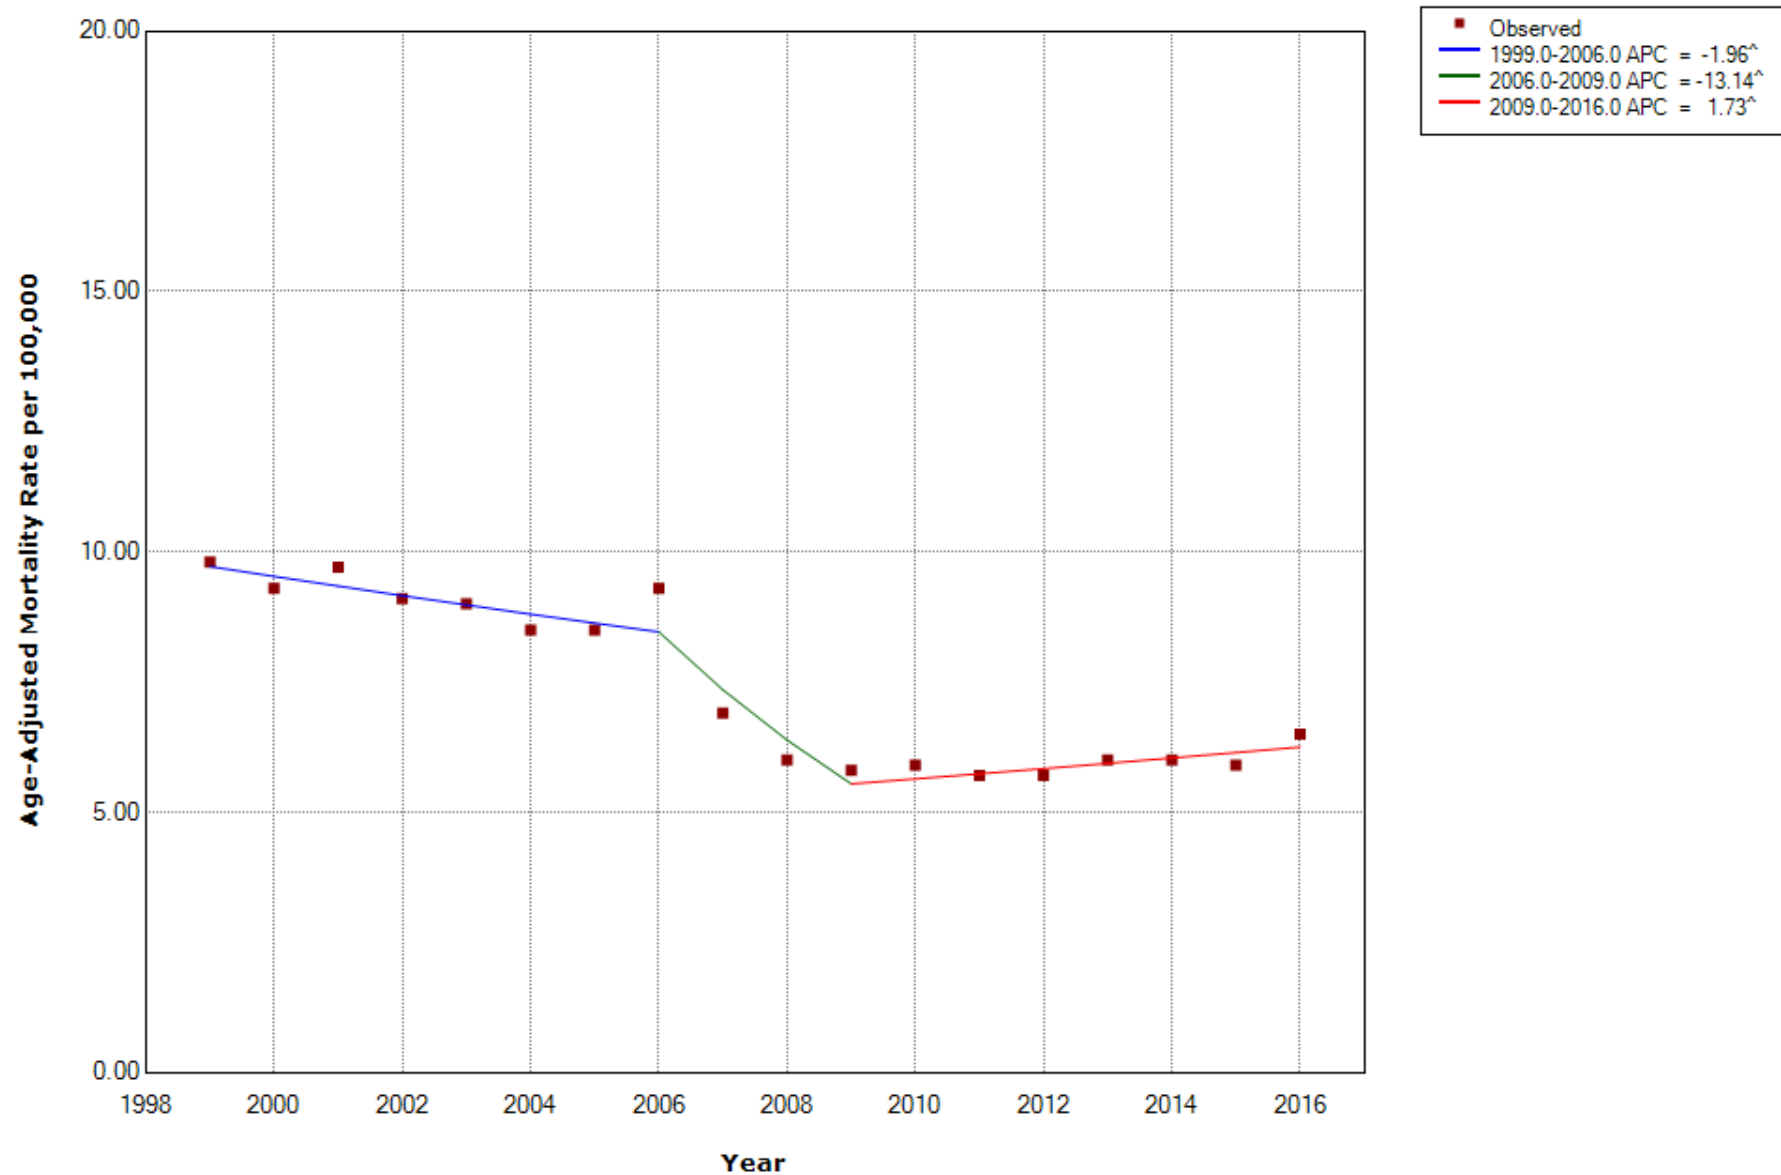

<sup>^</sup> Indicates that the Annual Percent Change (APC) is significantly different from zero at the alpha = 0.05 level.  
Final Selected Model: 2 Joinpoints.

### Mental and behavioral disorders (F01-F99) / NH whites: 2 Joinpoints

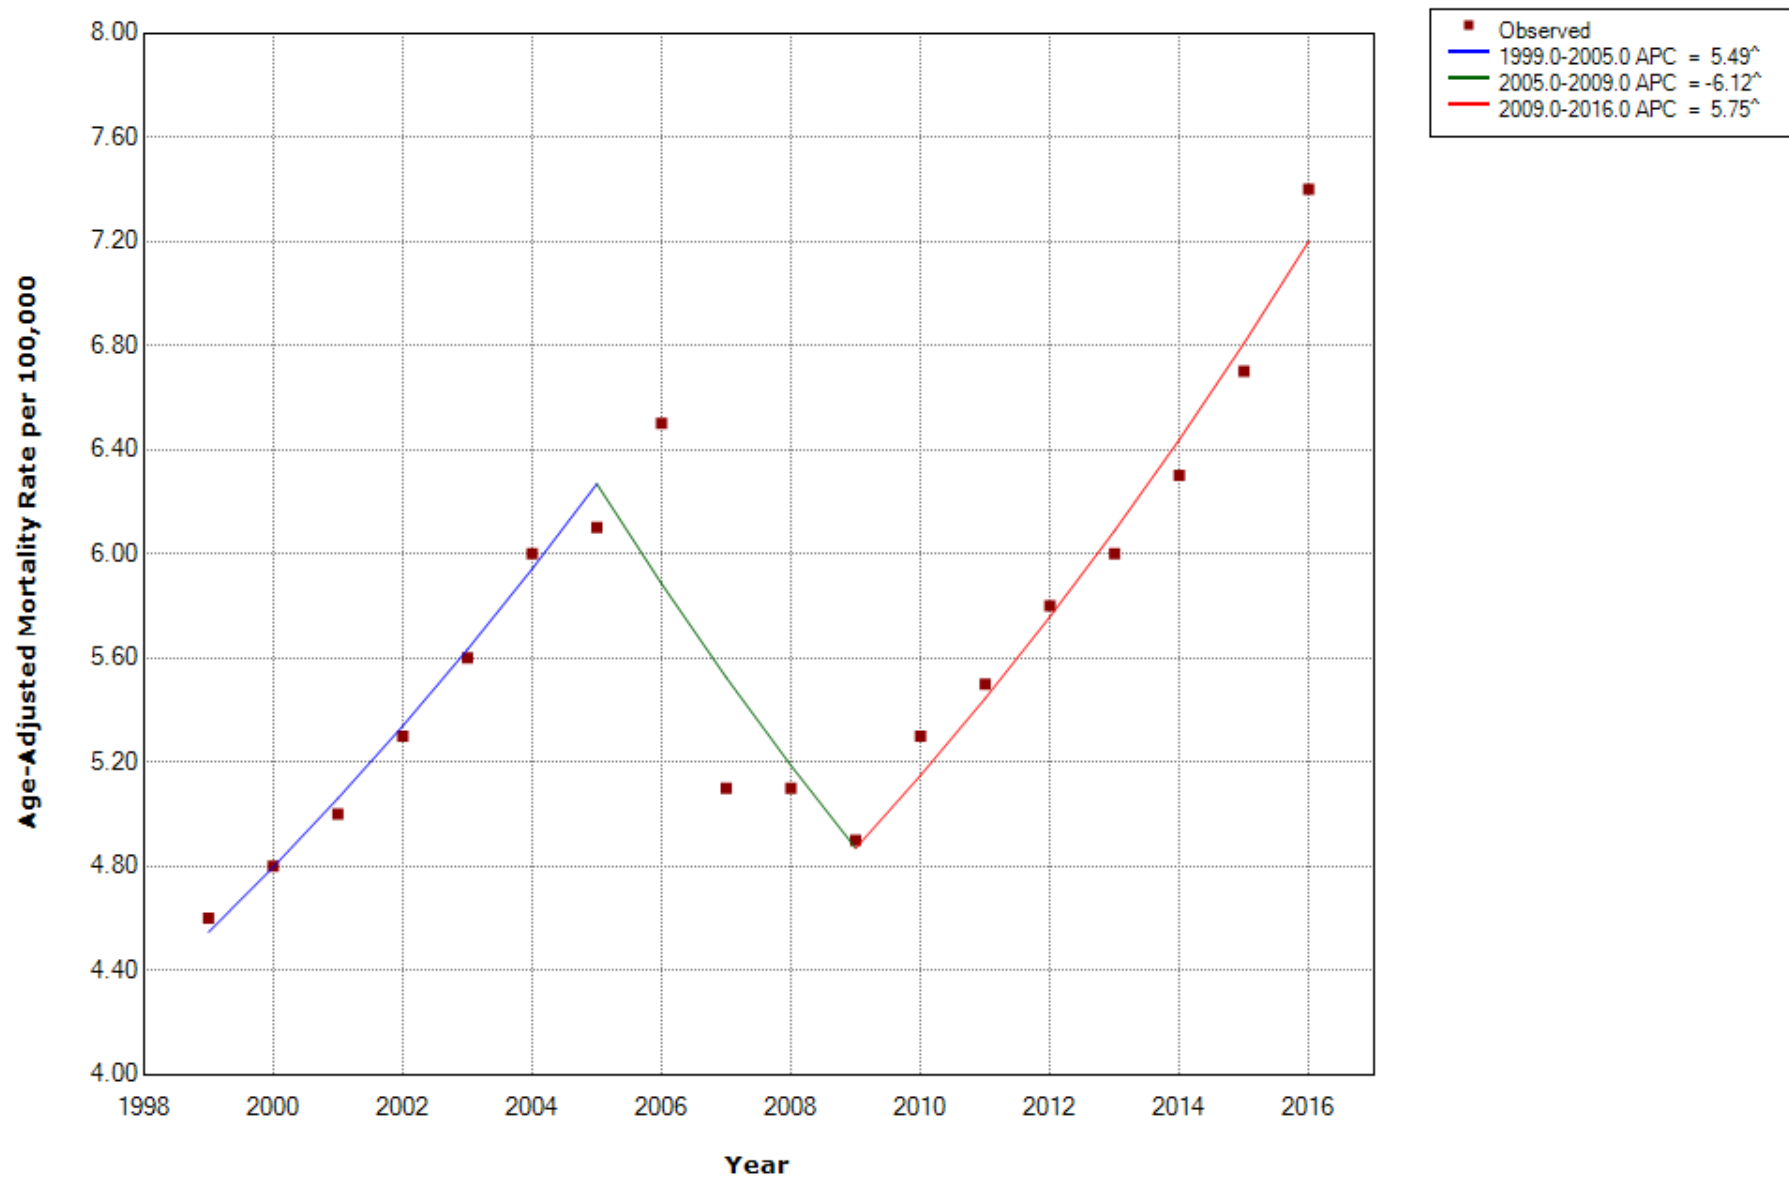

<sup>^</sup> Indicates that the Annual Percent Change (APC) is significantly different from zero at the alpha = 0.05 level.  
Final Selected Model: 2 Joinpoints.

### Mental and behavioral disorders (F01-F99) / Hispanics: 2 Joinpoints

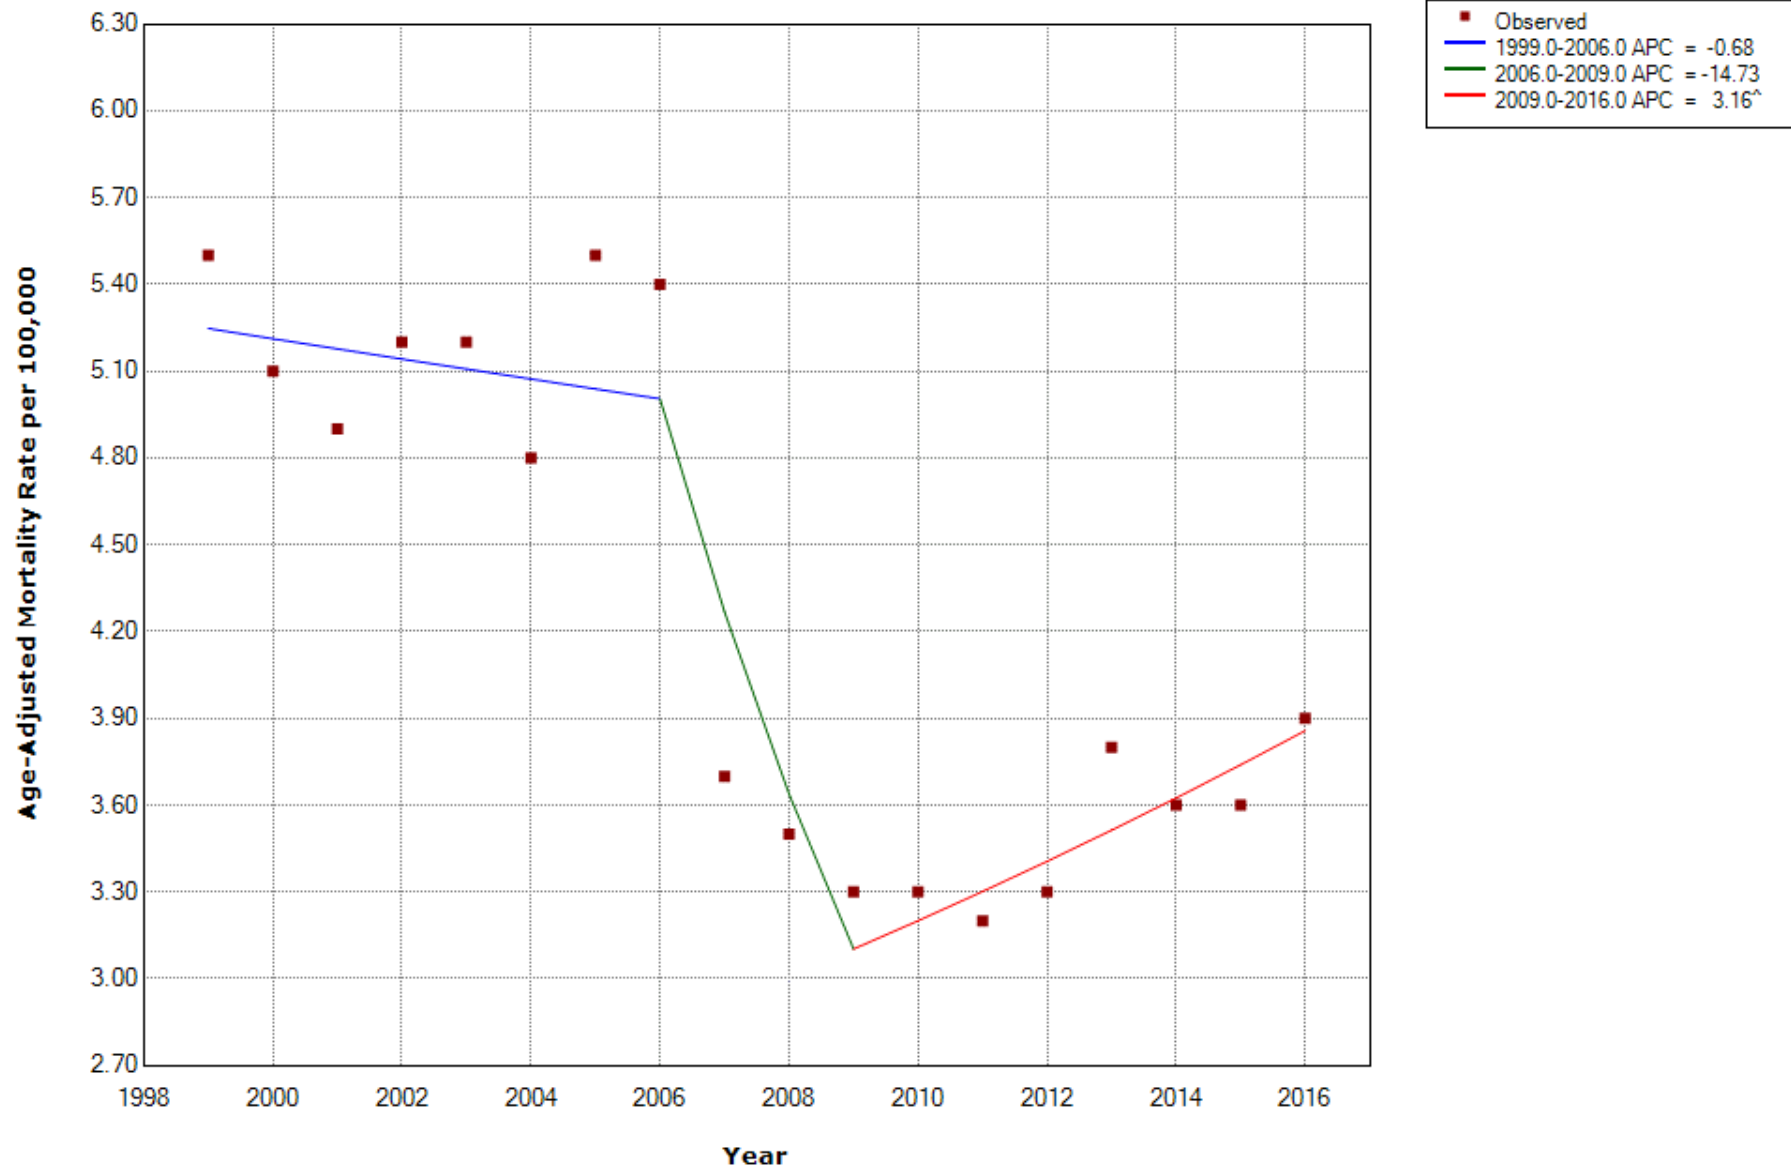

^ Indicates that the Annual Percent Change (APC) is significantly different from zero at the alpha = 0.05 level.  
Final Selected Model: 2 Joinpoints.

Diseases of the nervous system (G00-G98) / NH AIAN: 0 Joinpoints

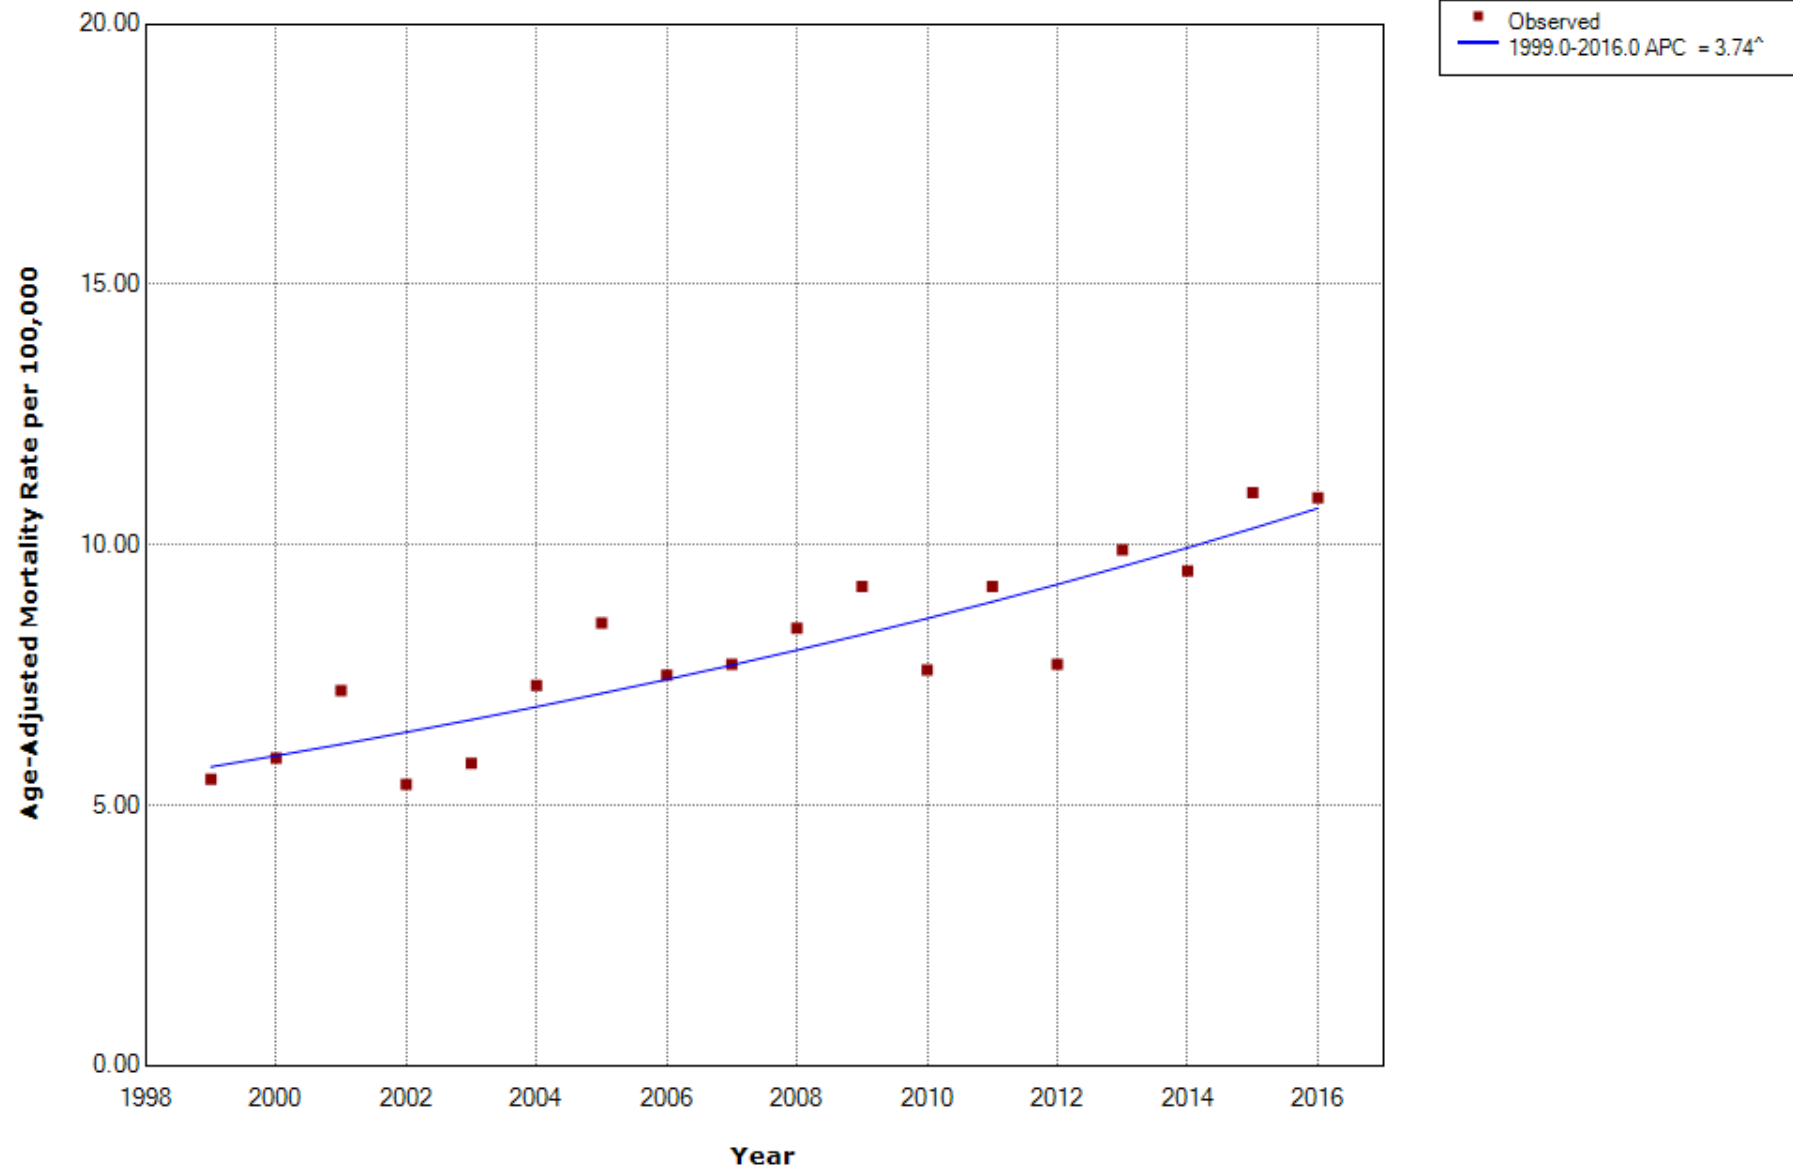

^ Indicates that the Annual Percent Change (APC) is significantly different from zero at the alpha = 0.05 level.  
Final Selected Model: 0 Joinpoints.

Diseases of the nervous system (G00-G98) / NH API: 0 Joinpoints

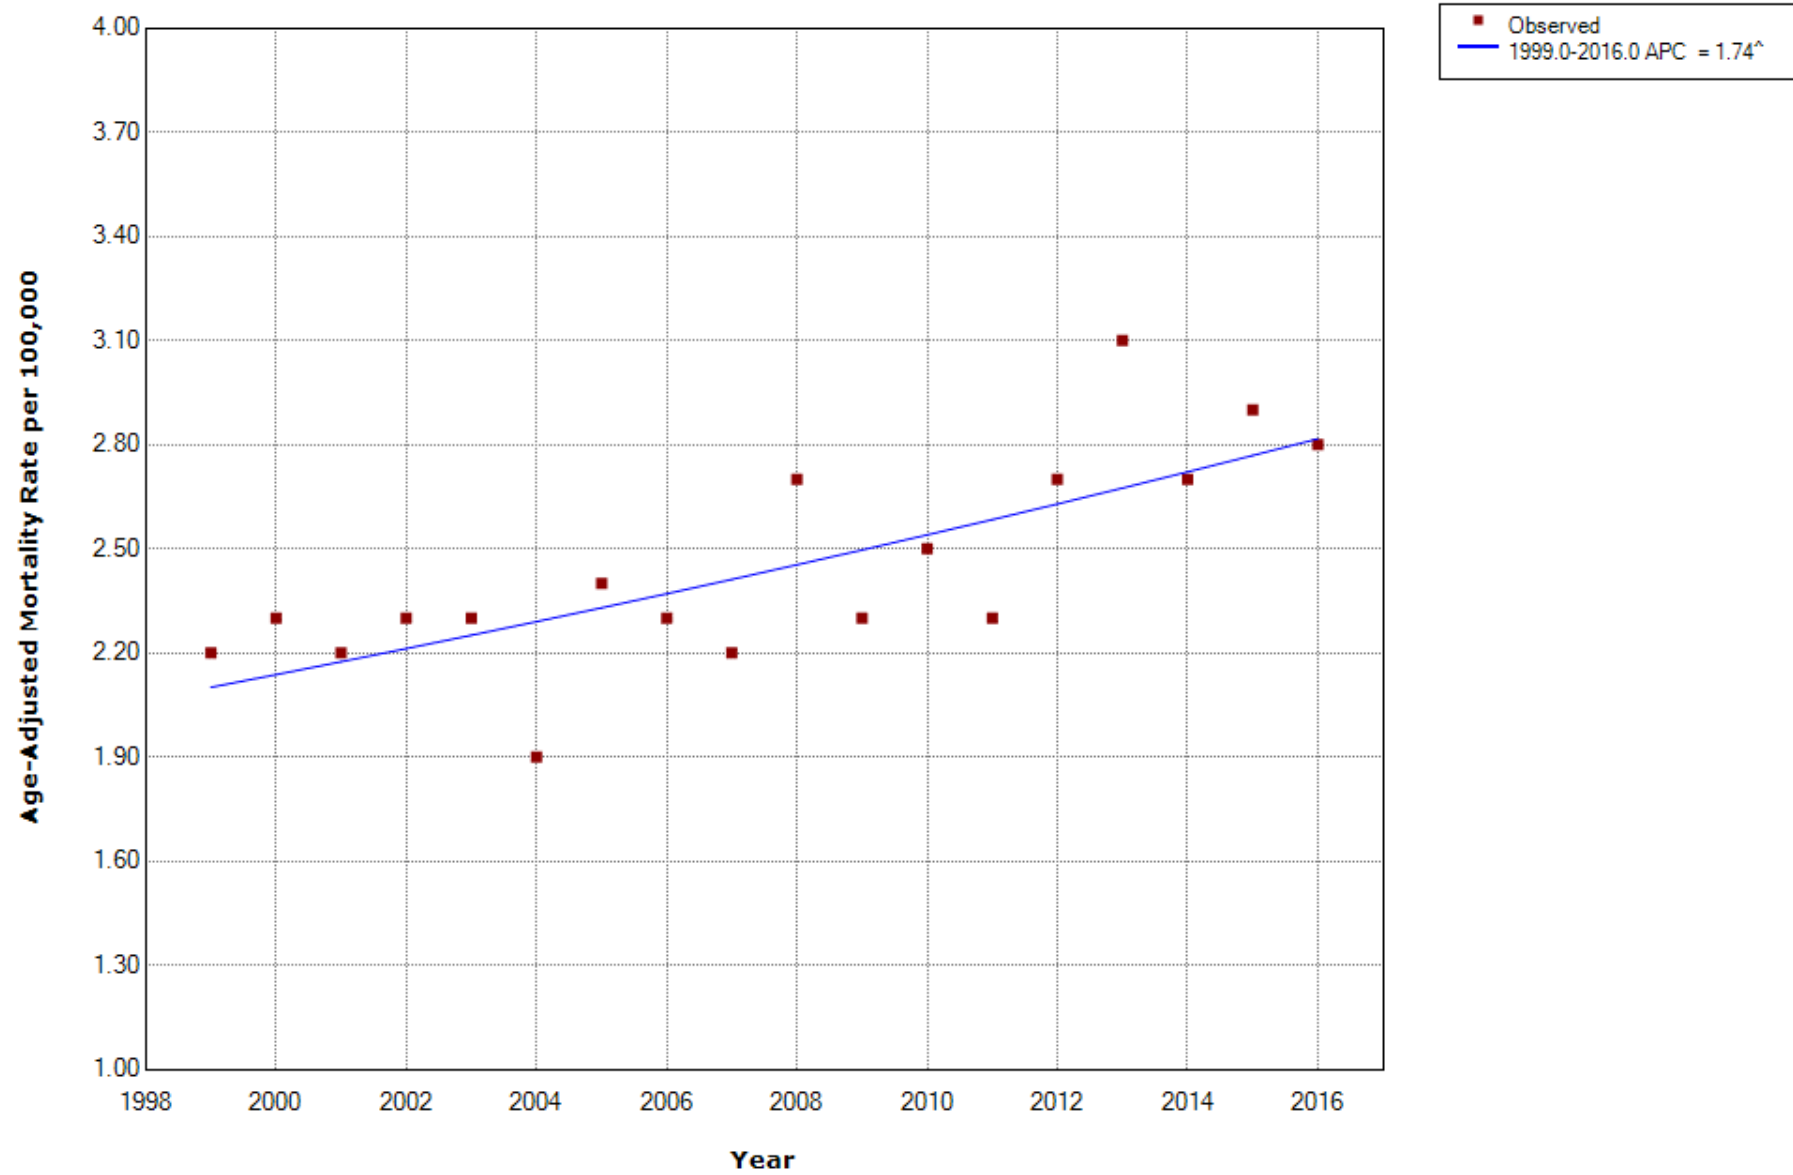

^ Indicates that the Annual Percent Change (APC) is significantly different from zero at the alpha = 0.05 level.  
Final Selected Model: 0 Joinpoints.

Diseases of the nervous system (G00-G98) / NH Blacks: 0 Joinpoints

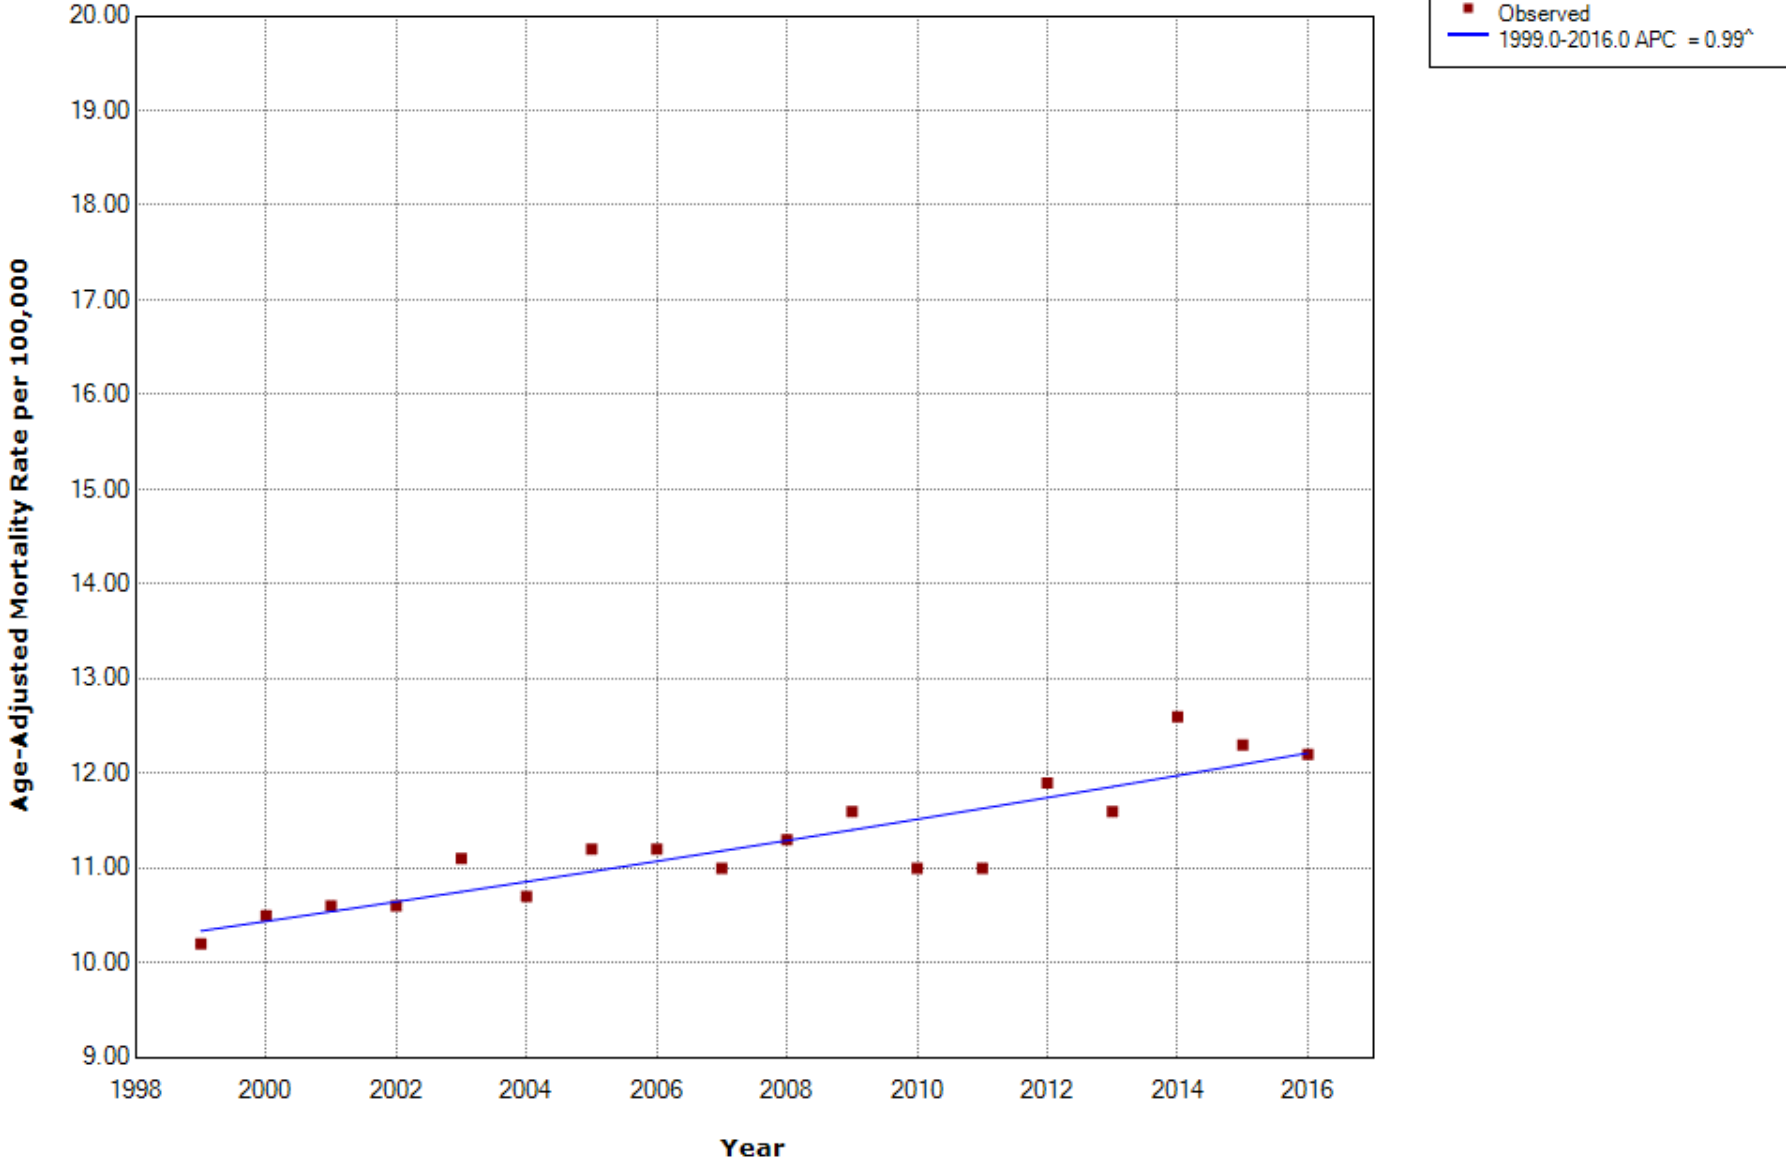

^ Indicates that the Annual Percent Change (APC) is significantly different from zero at the alpha = 0.05 level.  
Final Selected Model: 0 Joinpoints.



Diseases of the nervous system (G00-G98) / NH whites: 0 Joinpoints

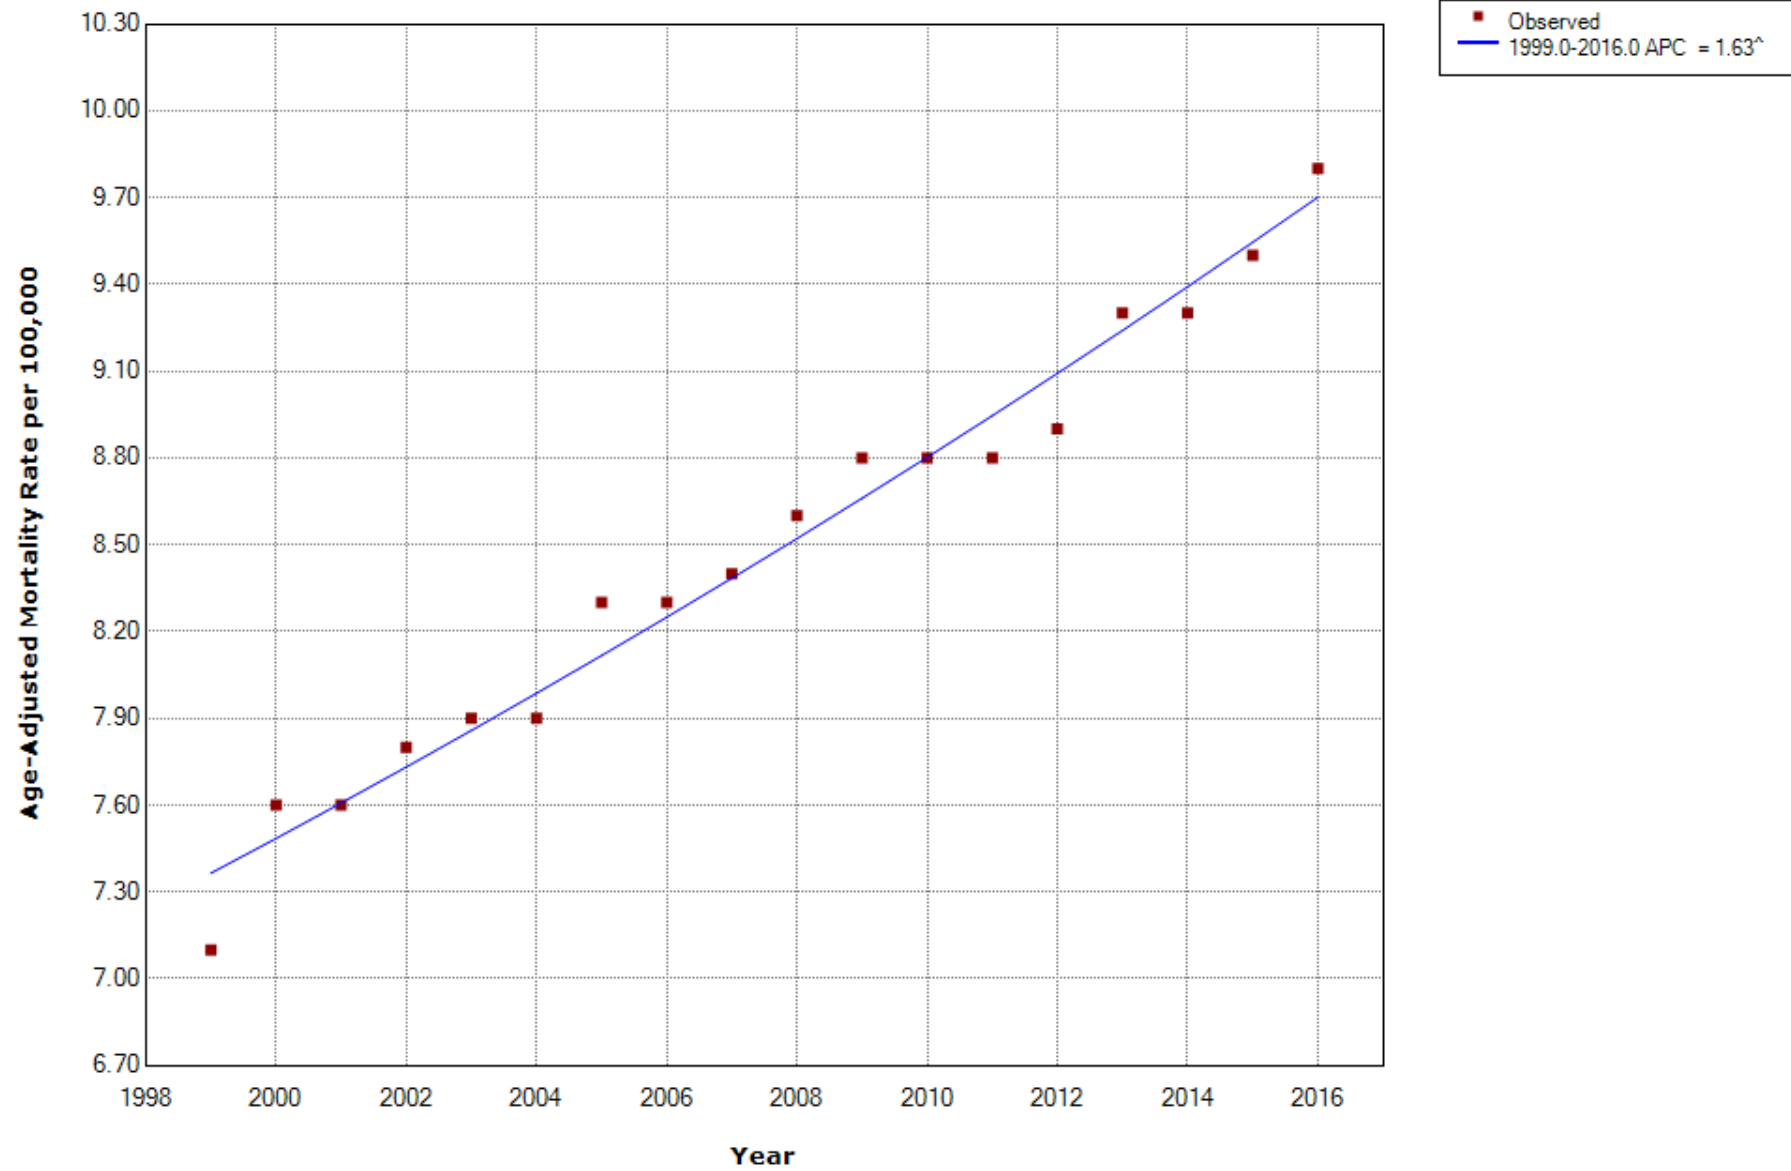

^ Indicates that the Annual Percent Change (APC) is significantly different from zero at the alpha = 0.05 level.  
Final Selected Model: 0 Joinpoints.

Diseases of the nervous system (G00-G98) / Hispanics: 0 Joinpoints

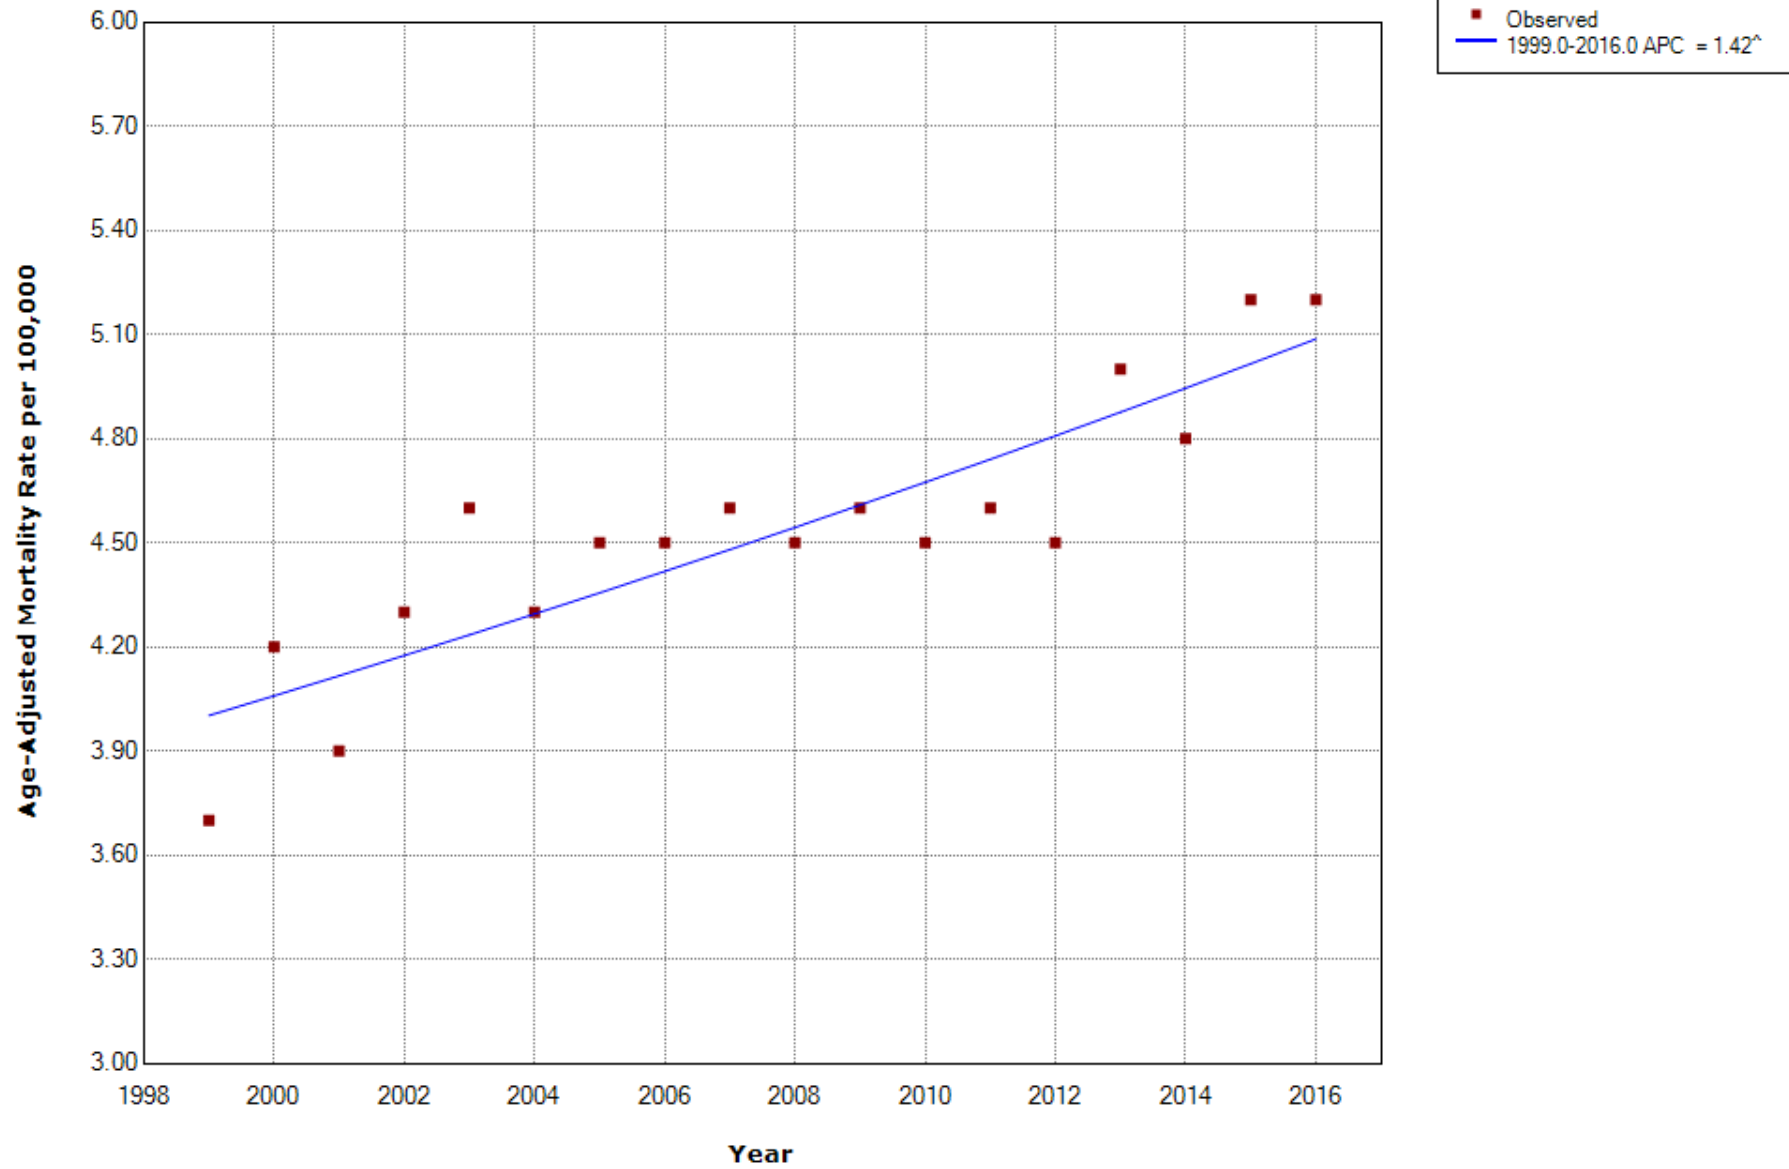

^ Indicates that the Annual Percent Change (APC) is significantly different from zero at the alpha = 0.05 level.  
Final Selected Model: 0 Joinpoints.

Diseases of the genitourinary system (N00-N98) / NH AIAN: 0 Joinpoints

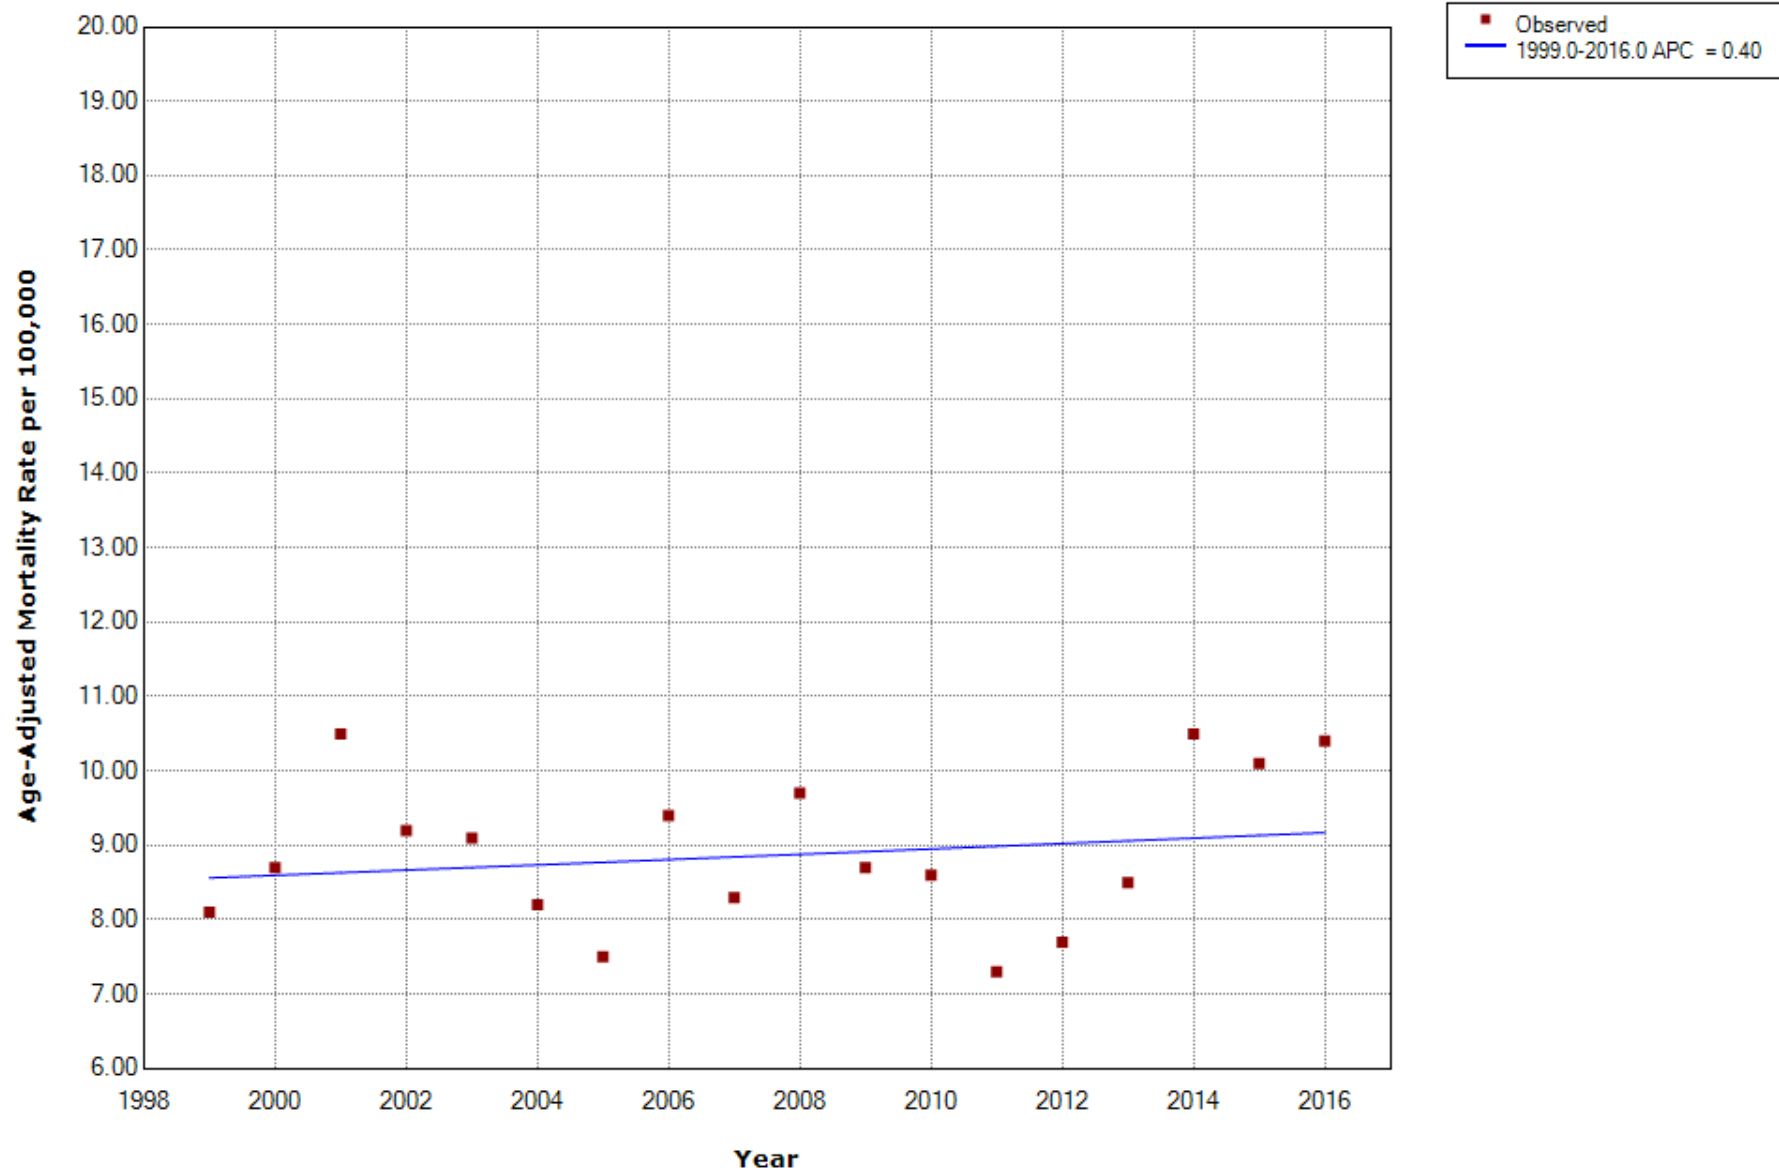

^ Indicates that the Annual Percent Change (APC) is significantly different from zero at the alpha = 0.05 level.  
Final Selected Model: 0 Joinpoints.

### Diseases of the genitourinary system (N00-N98) / NH API: 0 Joinpoints

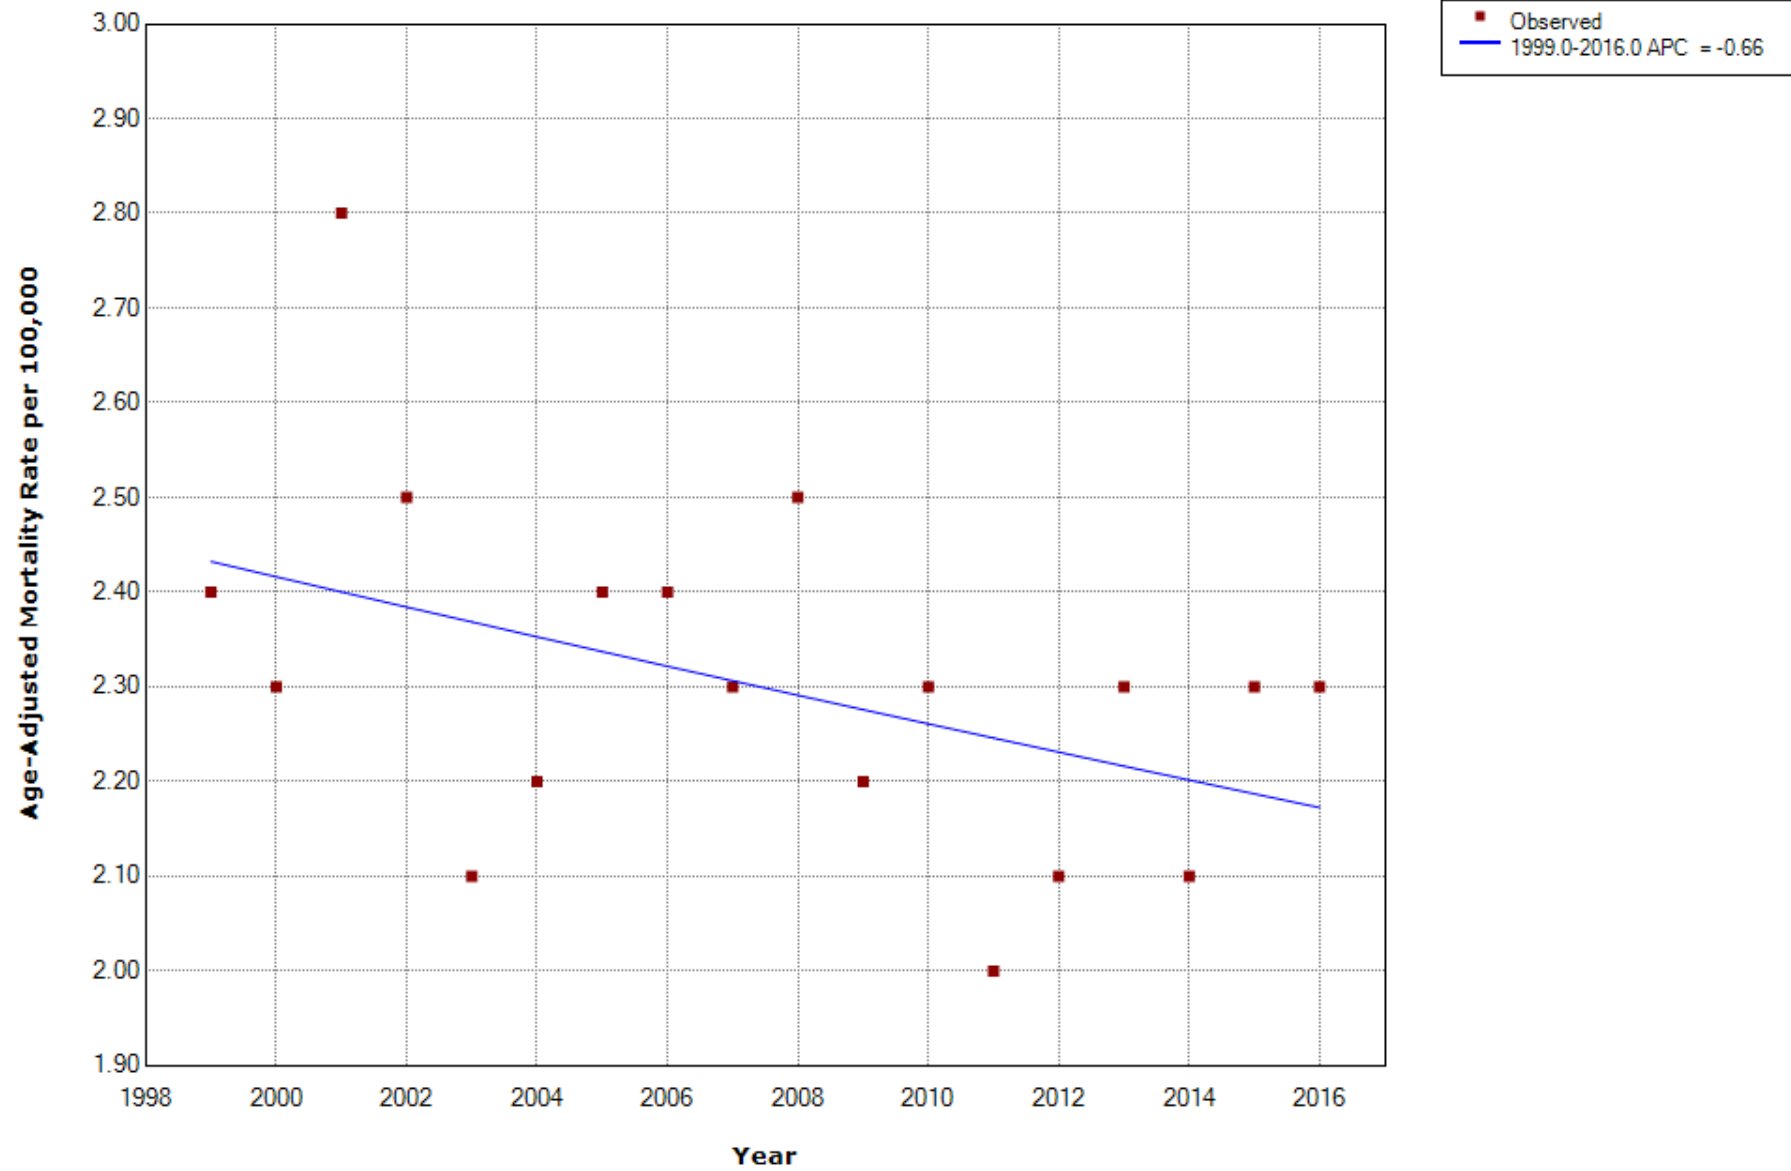

^ Indicates that the Annual Percent Change (APC) is significantly different from zero at the alpha = 0.05 level.  
Final Selected Model: 0 Joinpoints.

### Diseases of the genitourinary system (N00-N98) / NH Blacks: 2 Joinpoints

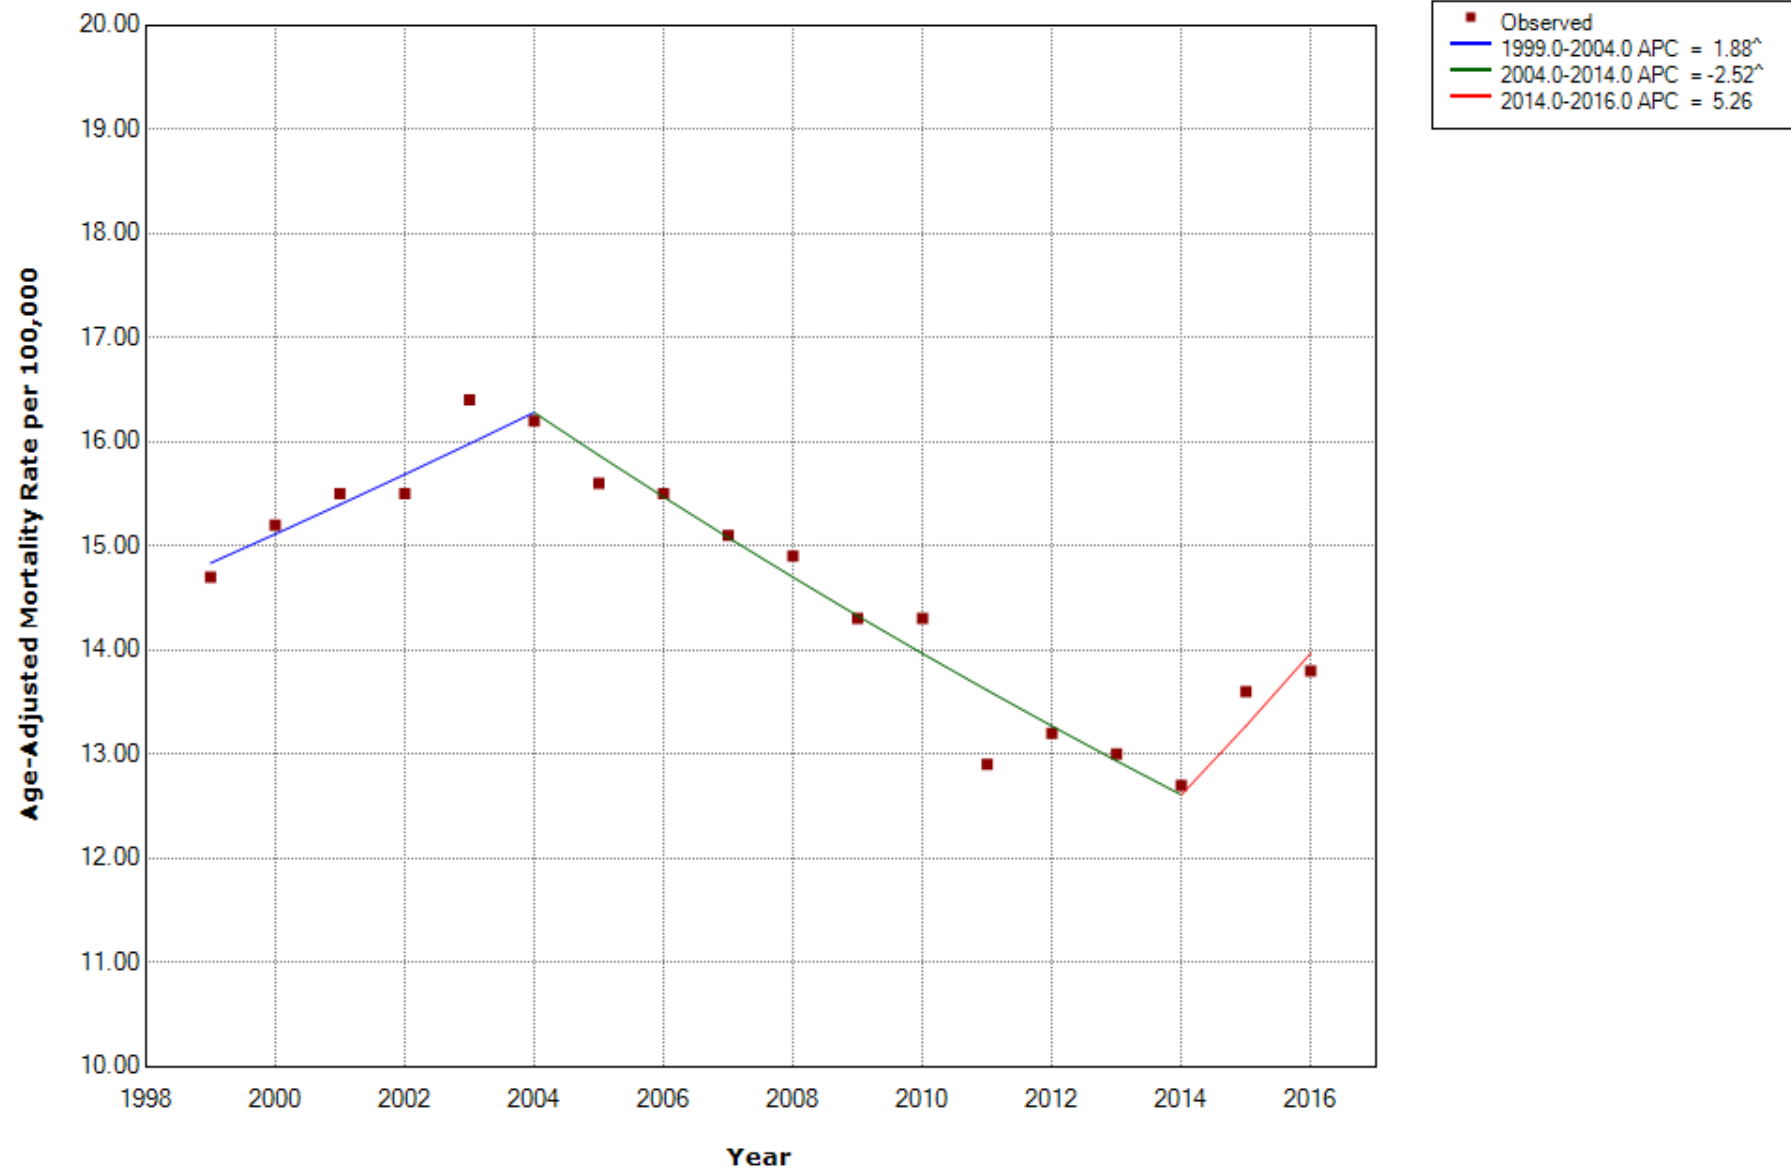

^ Indicates that the Annual Percent Change (APC) is significantly different from zero at the alpha = 0.05 level.  
Final Selected Model: 2 Joinpoints.

### Diseases of the genitourinary system (N00-N98) / NH whites: 2 Joinpoints

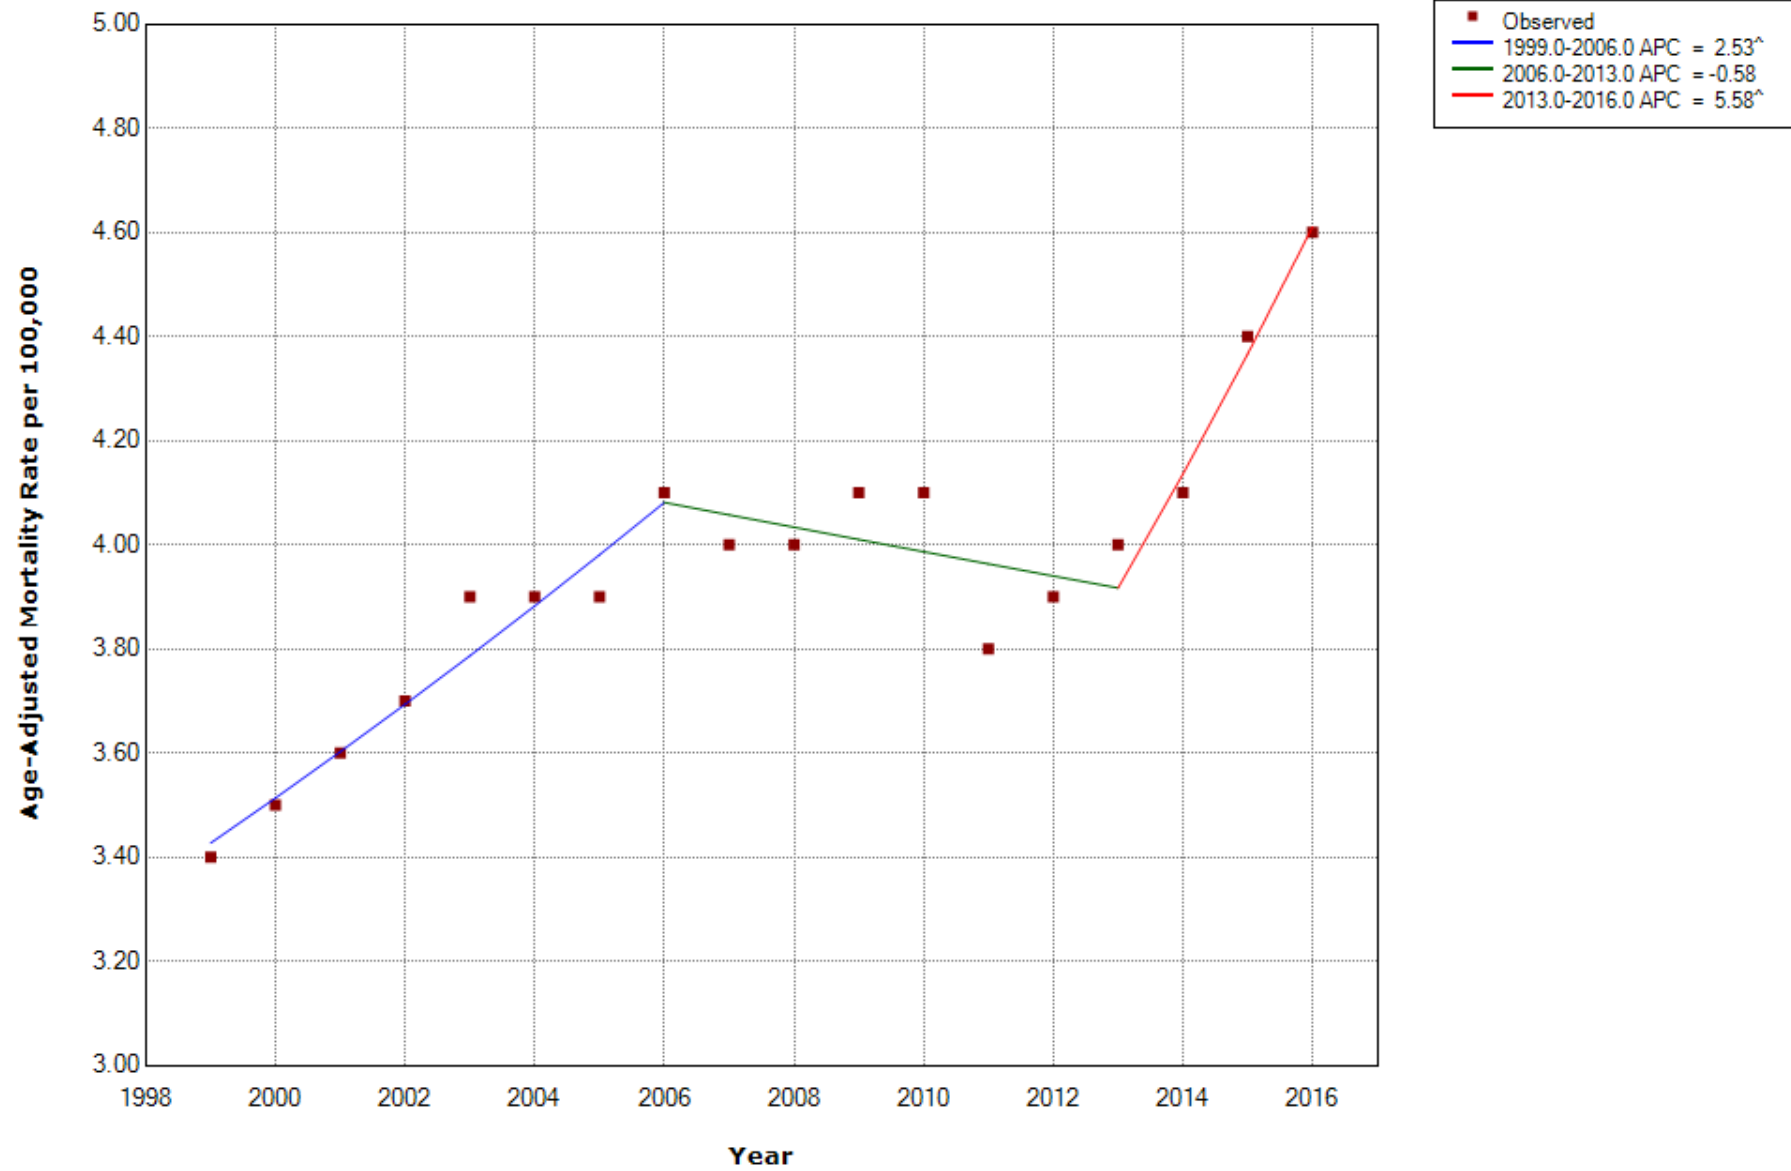

<sup>^</sup> Indicates that the Annual Percent Change (APC) is significantly different from zero at the alpha = 0.05 level.  
Final Selected Model: 2 Joinpoints.

### Diseases of the genitourinary system (N00-N98) / Hispanics: 2 Joinspoints

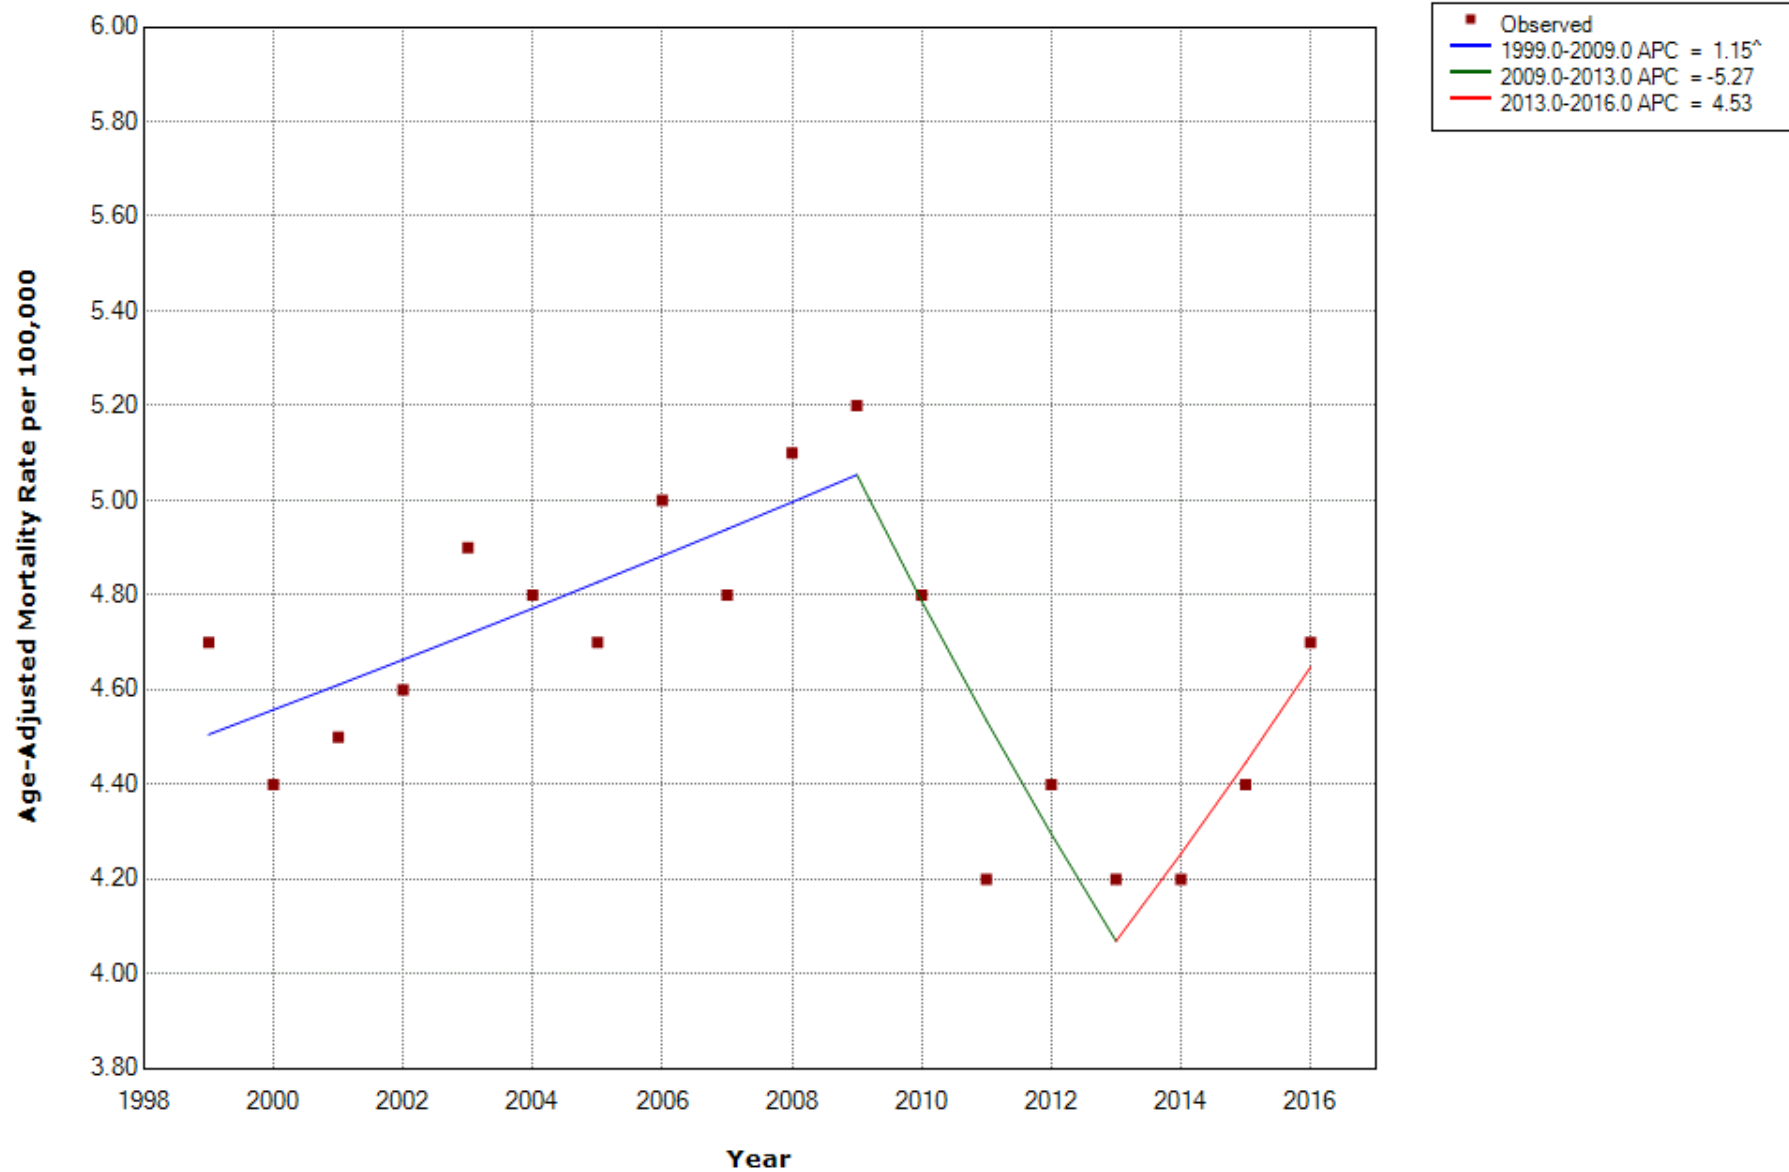

^ Indicates that the Annual Percent Change (APC) is significantly different from zero at the alpha = 0.05 level.  
Final Selected Model: 2 Joinspoints.

Pregnancy, childbirth and the puerperium (O00-O99) / NH AIAN: Observed

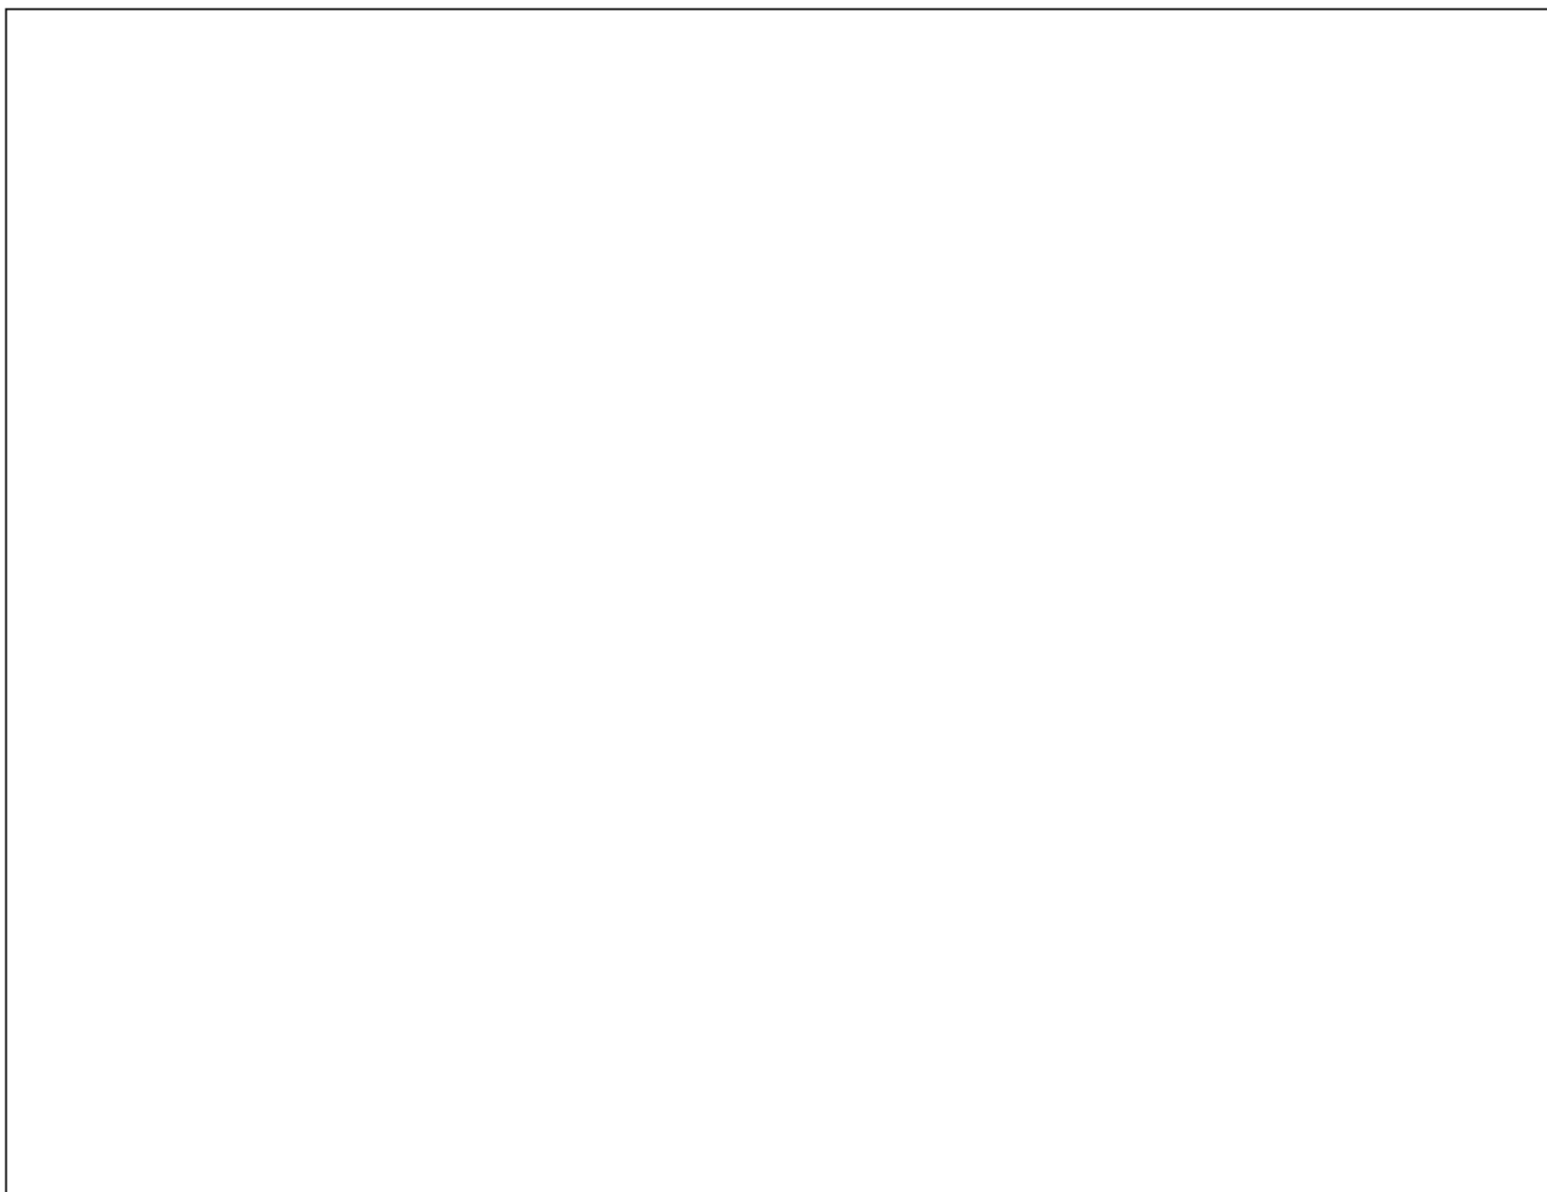

■ Observed

^ Indicates that the Annual Percent Change (APC) is significantly different from zero at the alpha = 0.05 level.

\*\* Joinpoint cannot process records with missing dependent variable values. Joinpoint will not analyze by-groups that have this error. (Row = 810, Col = 1)



### Pregnancy, childbirth and the puerperium (O00-O99) / NH API: Observed

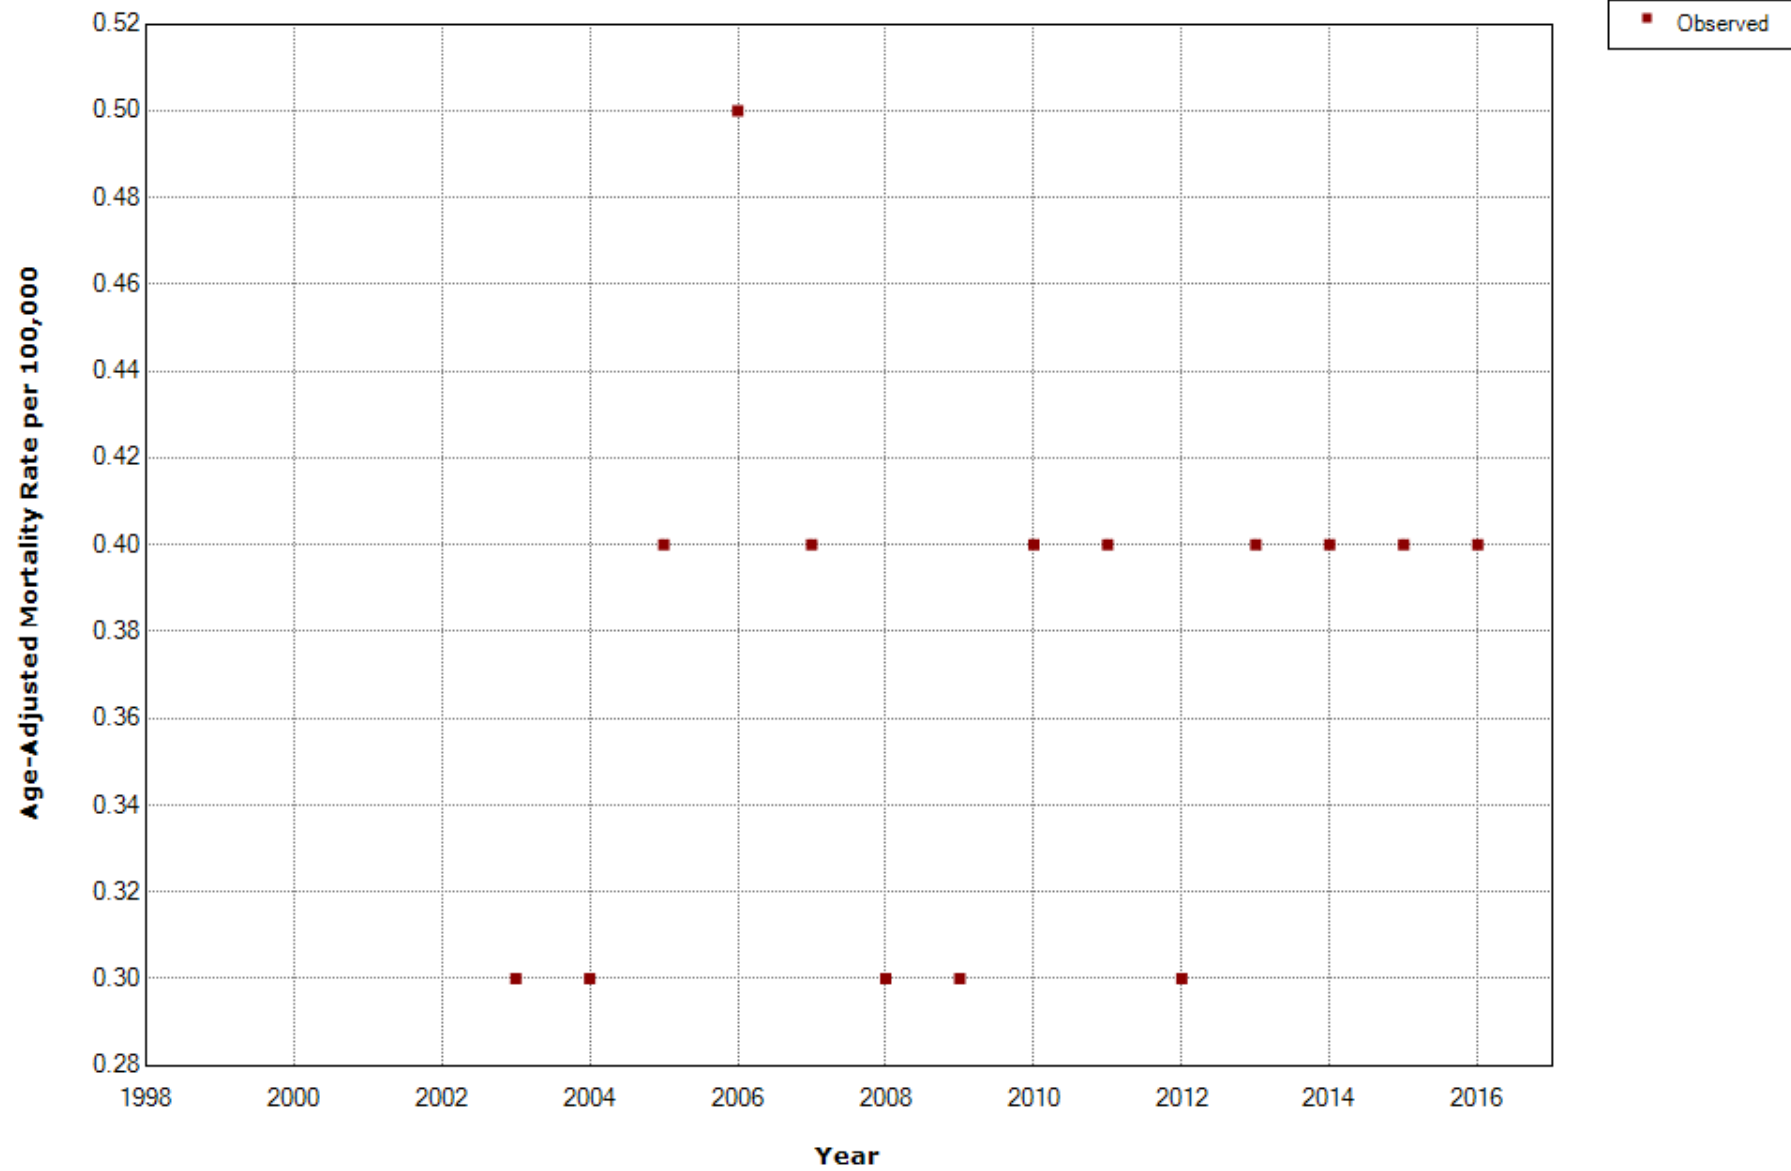

^ Indicates that the Annual Percent Change (APC) is significantly different from zero at the alpha = 0.05 level.

\* Joinpoint cannot process records with missing dependent variable values. Joinpoint will not analyze by-groups that have this error. (Row = 828, Col = 1)

Pregnancy, childbirth and the puerperium (O00-O99) / NH Blacks: 0 Joinpoints

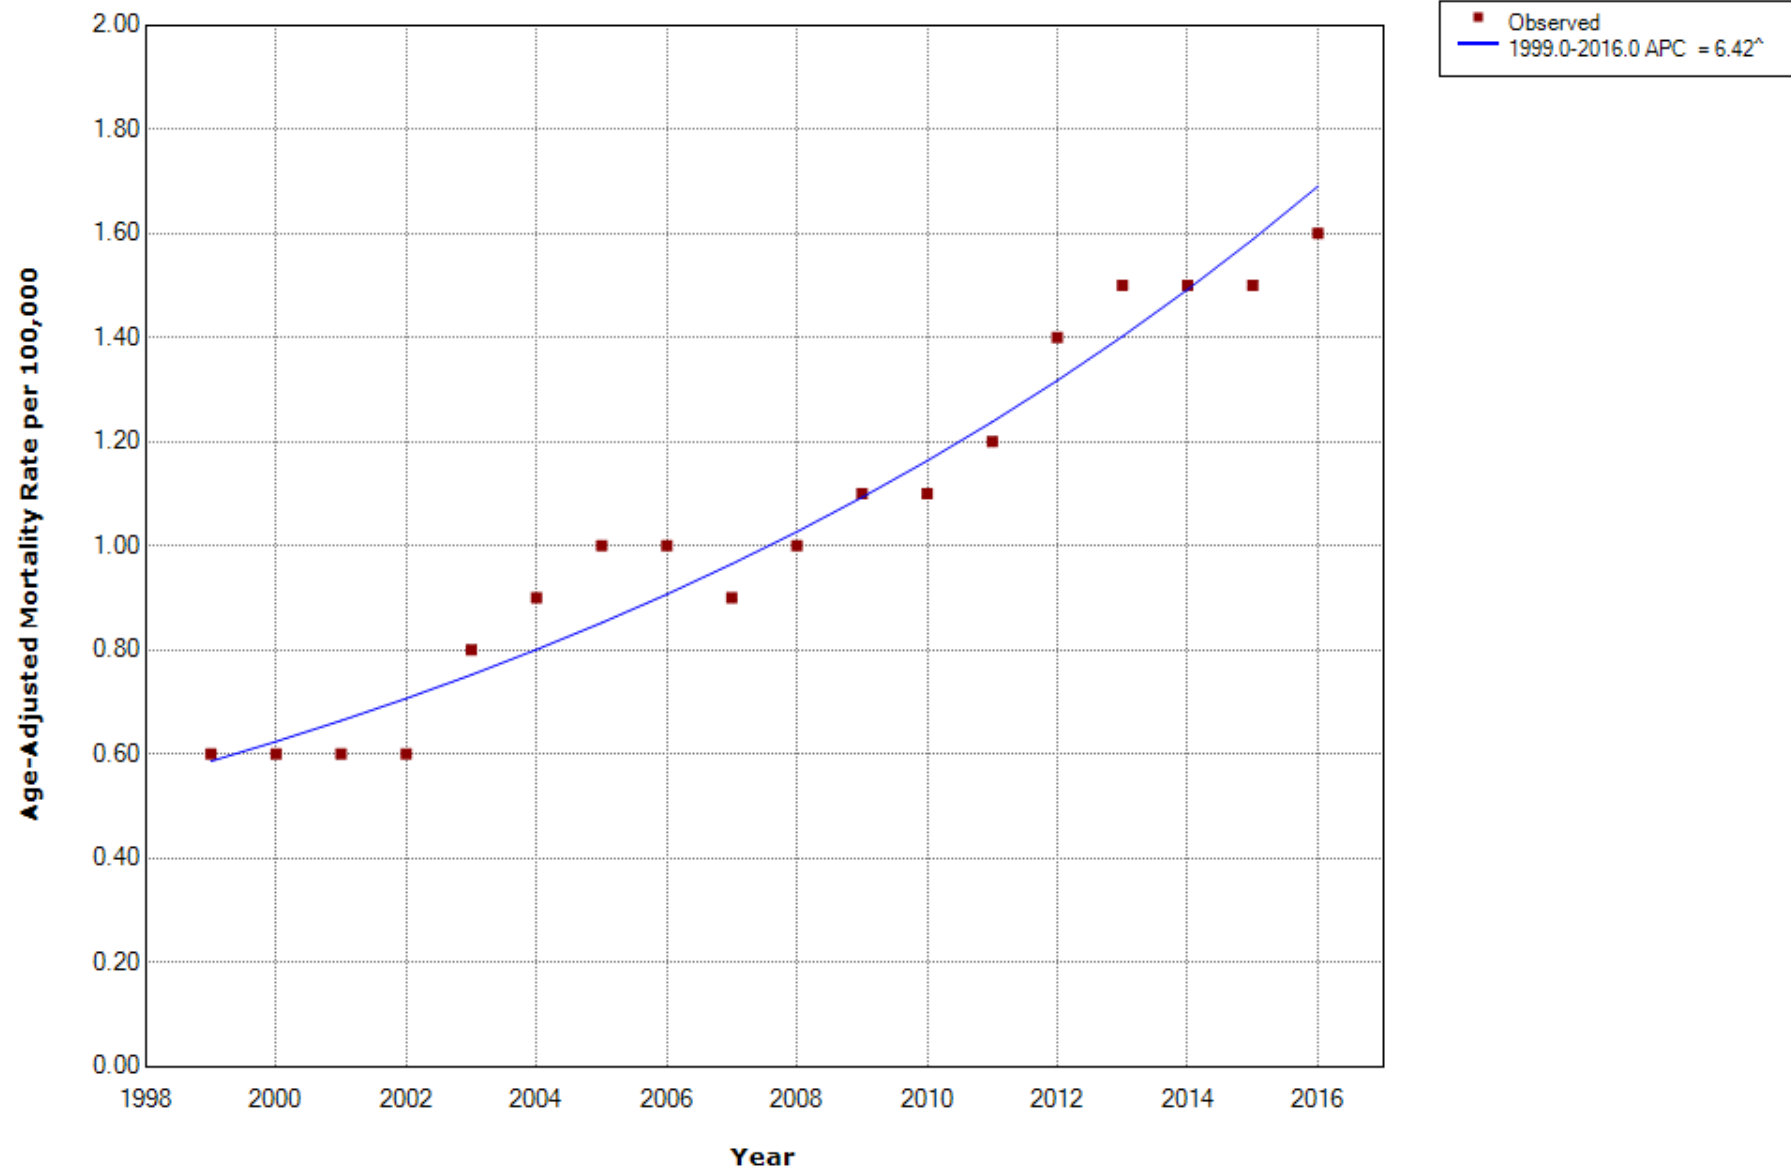

^ Indicates that the Annual Percent Change (APC) is significantly different from zero at the alpha = 0.05 level.  
Final Selected Model: 0 Joinpoints.

### Pregnancy, childbirth and the puerperium (O00-O99) / NH whites: 1 Joinpoint

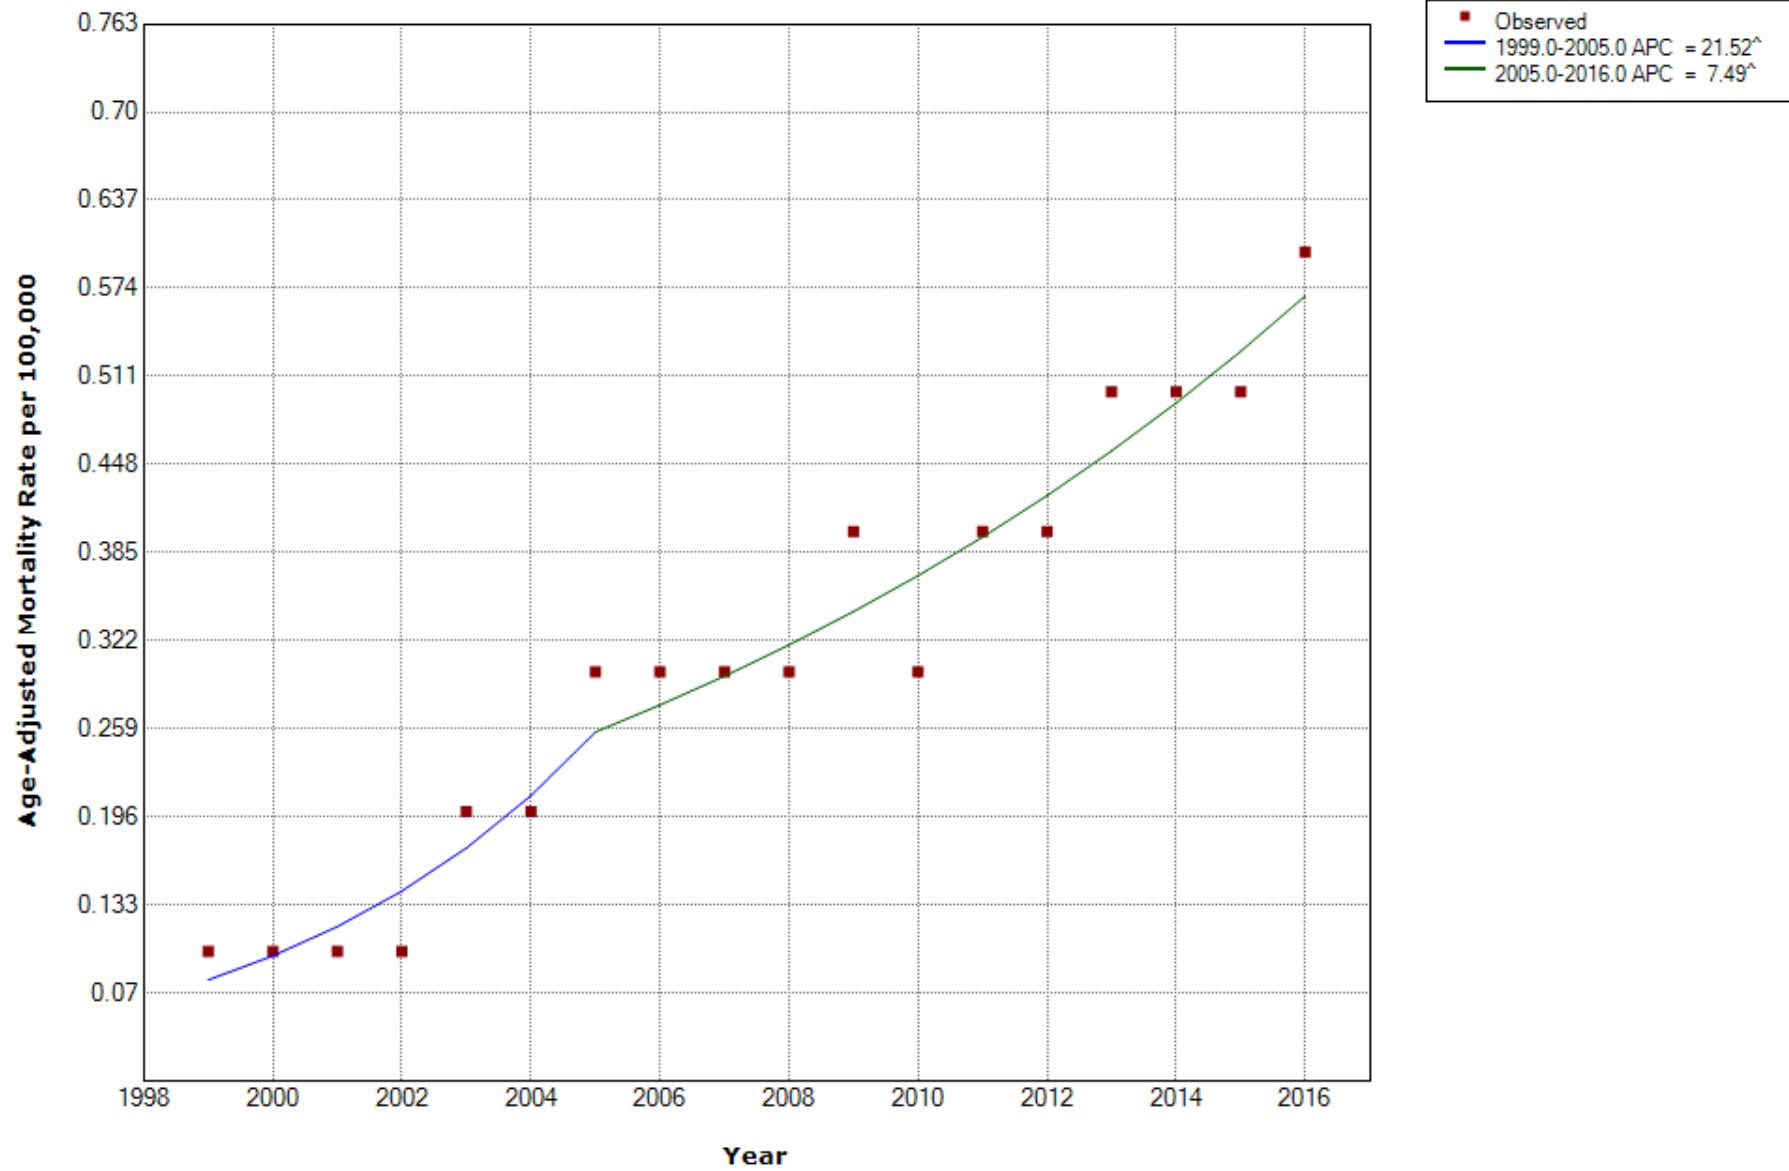

^ Indicates that the Annual Percent Change (APC) is significantly different from zero at the alpha = 0.05 level.  
Final Selected Model: 1 Joinpoint.

Pregnancy, childbirth and the puerperium (O00-O99) / Hispanics: 0 Joinpoints

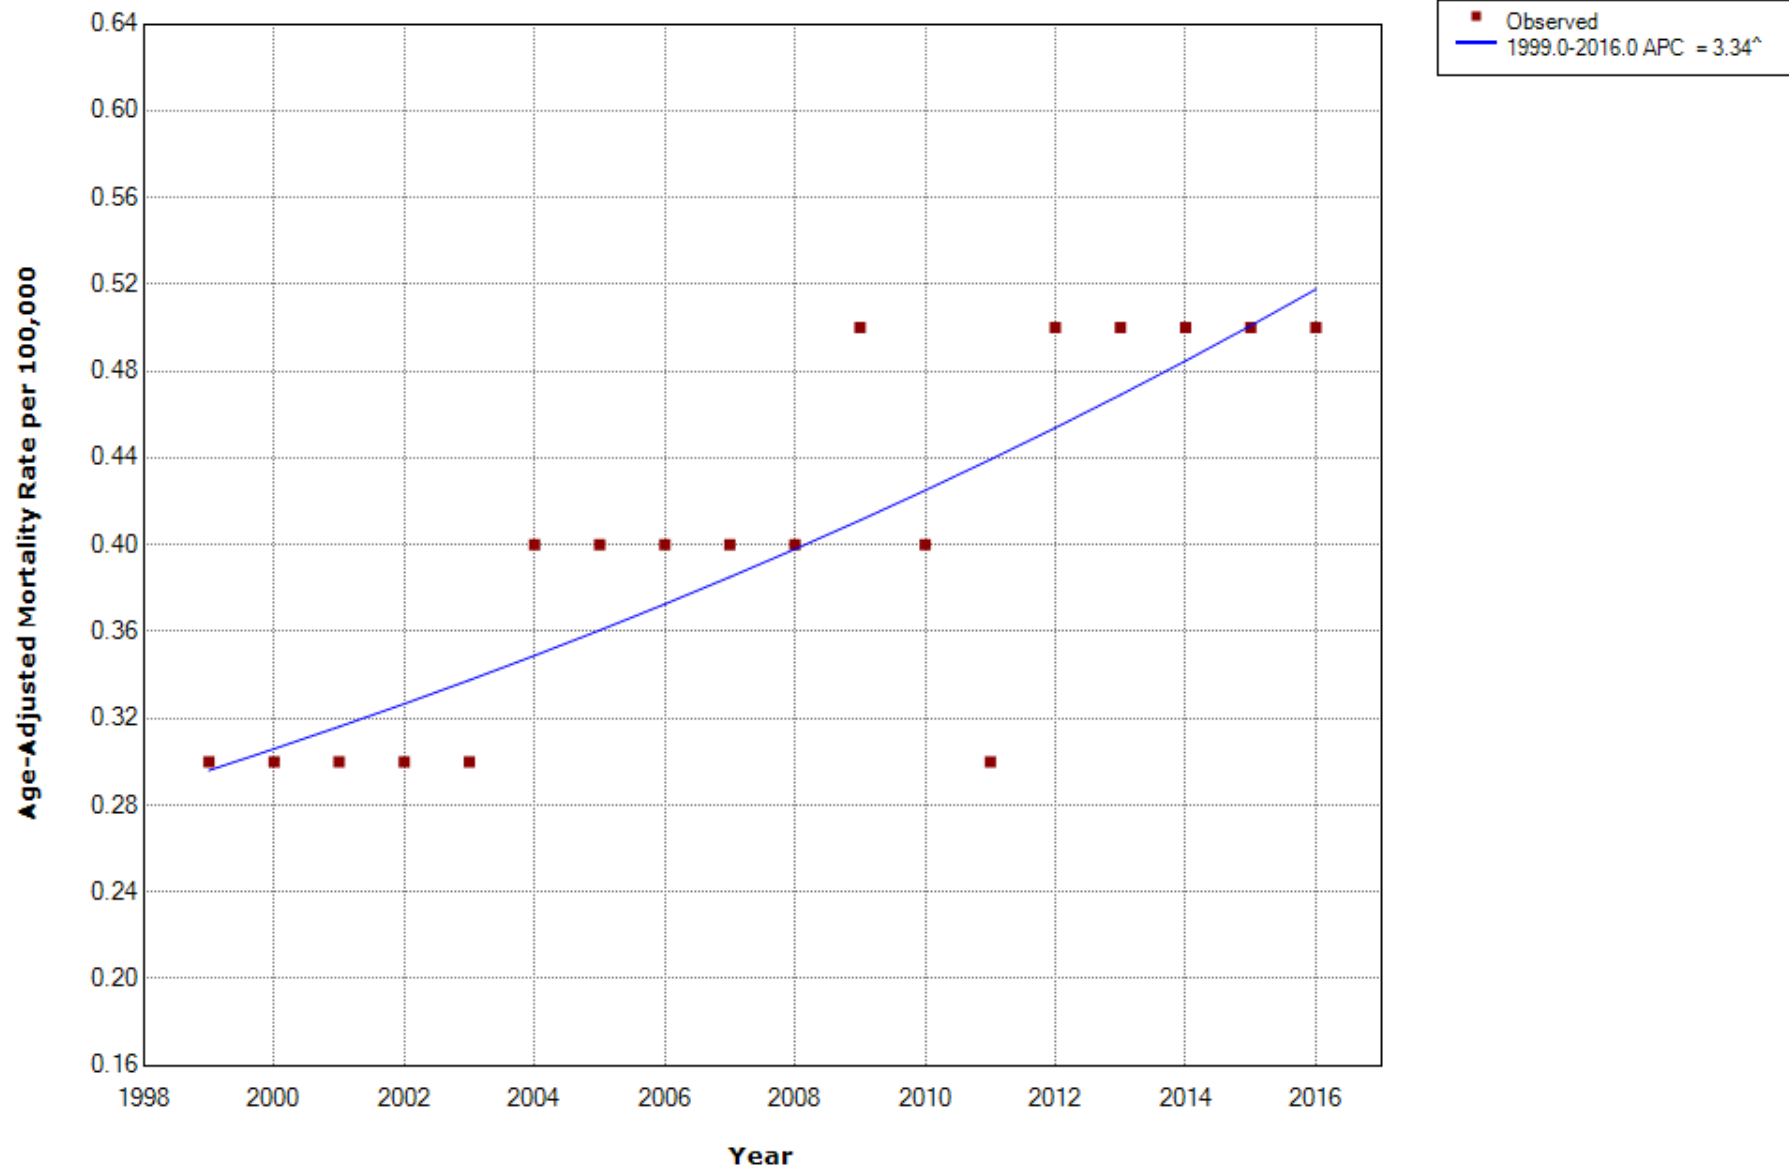

^ Indicates that the Annual Percent Change (APC) is significantly different from zero at the alpha = 0.05 level.  
Final Selected Model: 0 Joinpoints.

Symptoms, signs and abnormal clinical and laboratory findings, not elsewhere classified (R00-R99) / NH AIAN: 0 Joinpoints

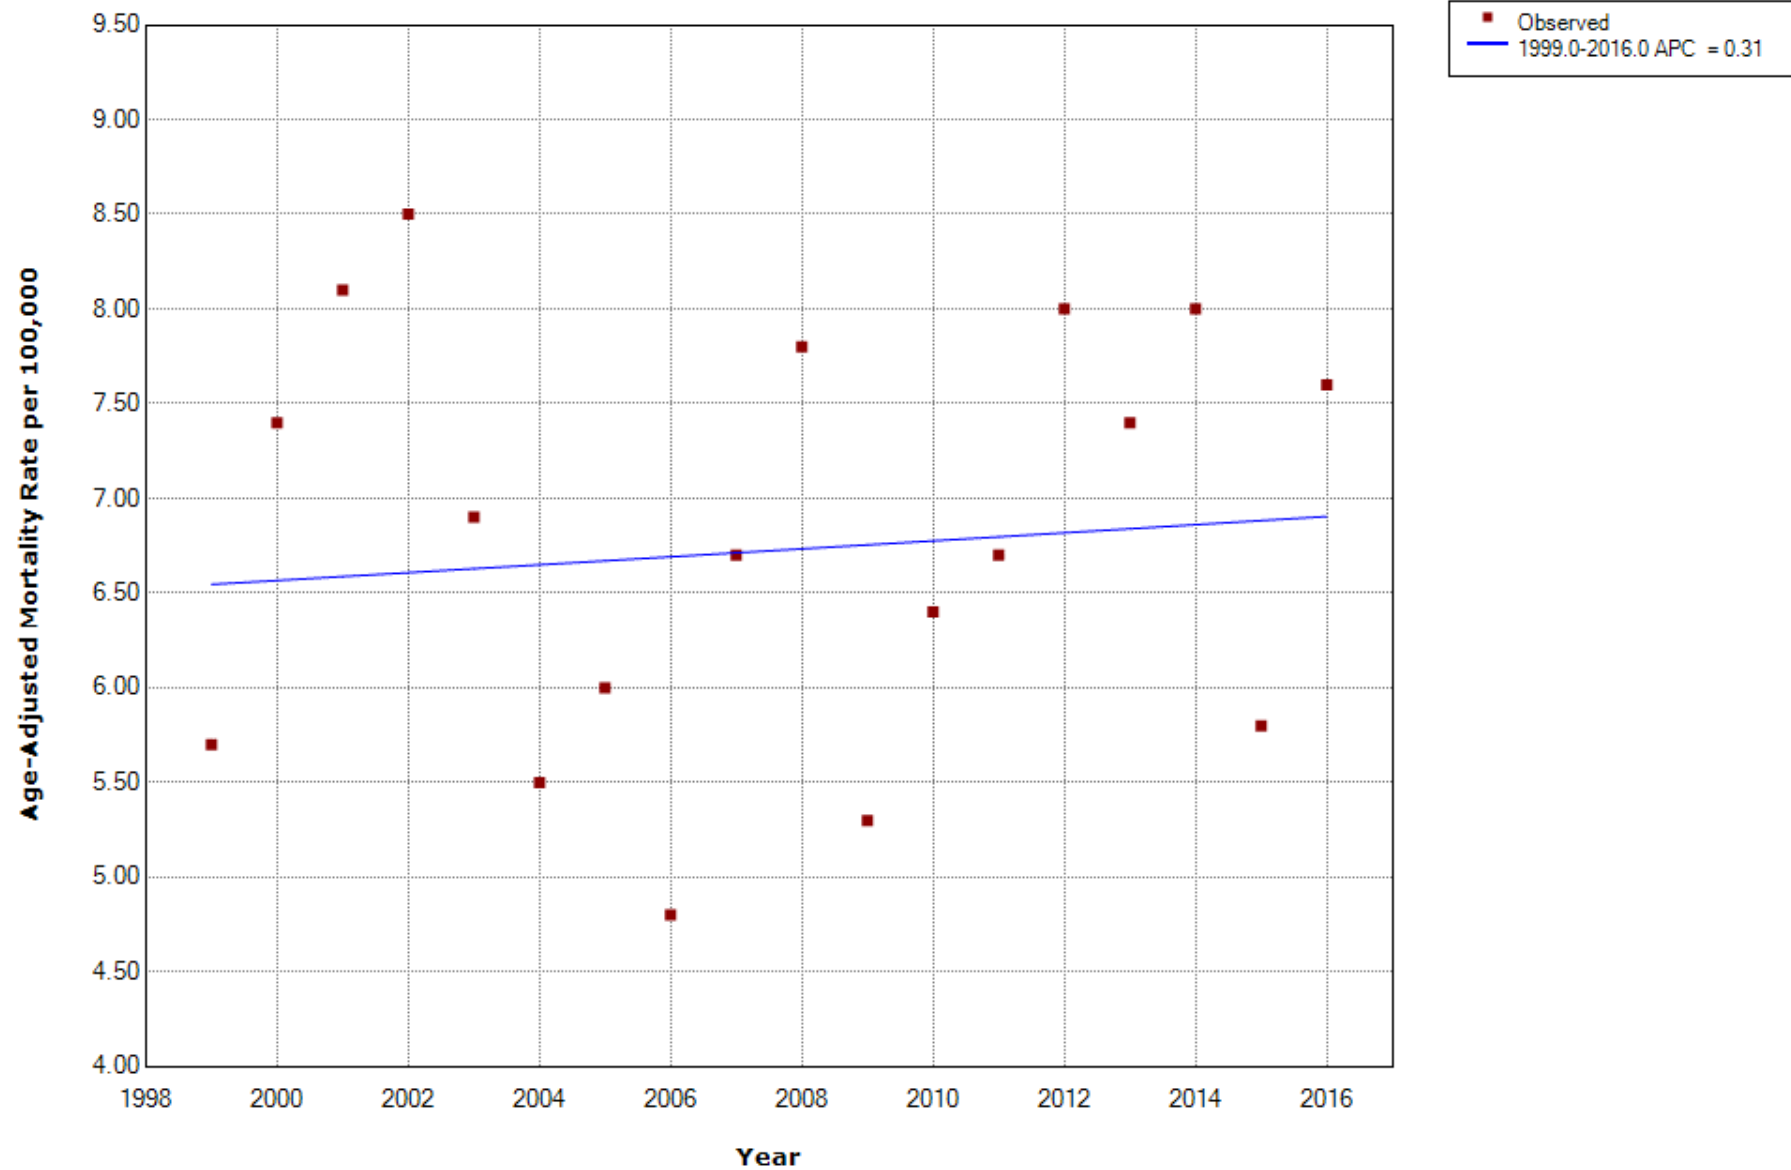

^ Indicates that the Annual Percent Change (APC) is significantly different from zero at the alpha = 0.05 level.  
Final Selected Model: 0 Joinpoints.

Symptoms, signs and abnormal clinical and laboratory findings, not elsewhere classified (R00-R99) / NH API: 0 Joinpoints

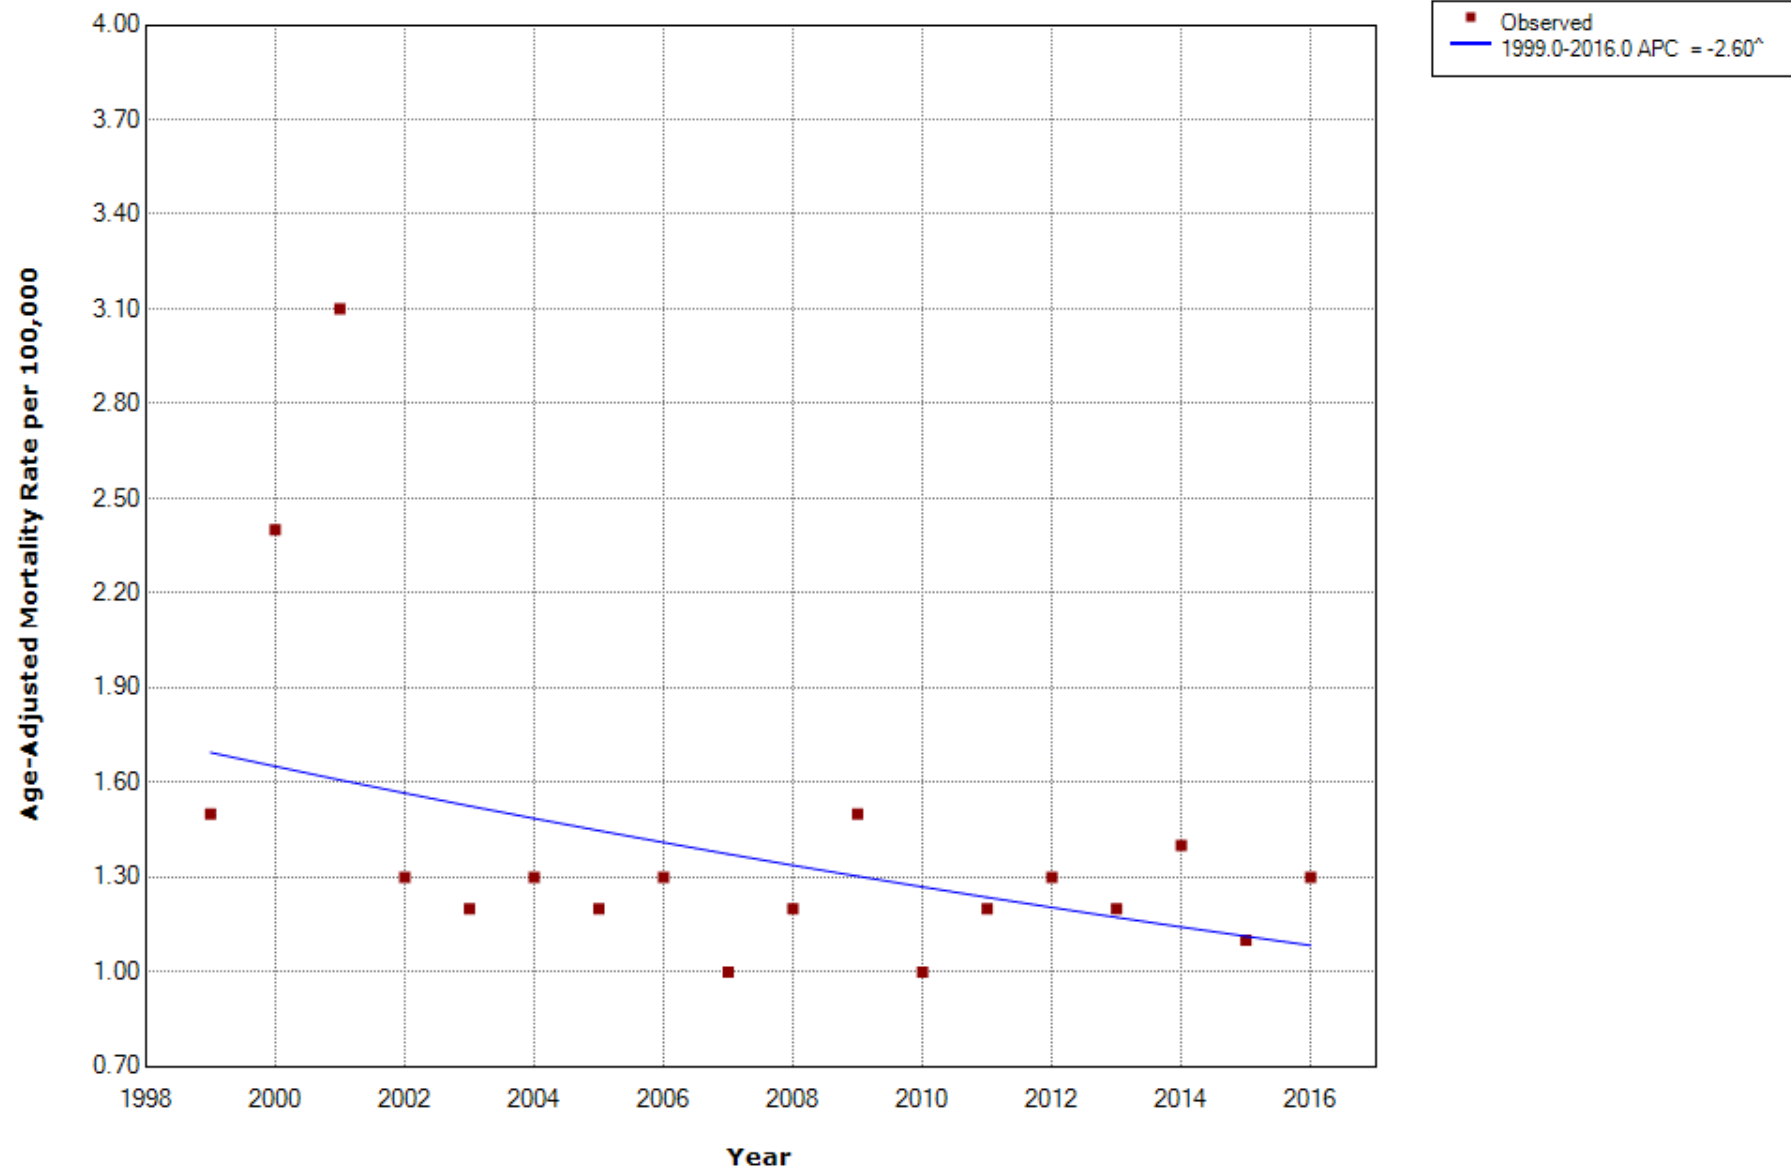

^ Indicates that the Annual Percent Change (APC) is significantly different from zero at the alpha = 0.05 level.  
Final Selected Model: 0 Joinpoints.

Symptoms, signs and abnormal clinical and laboratory findings, not elsewhere classified (R00-R99) / NH Blacks: 0 Joinpoints

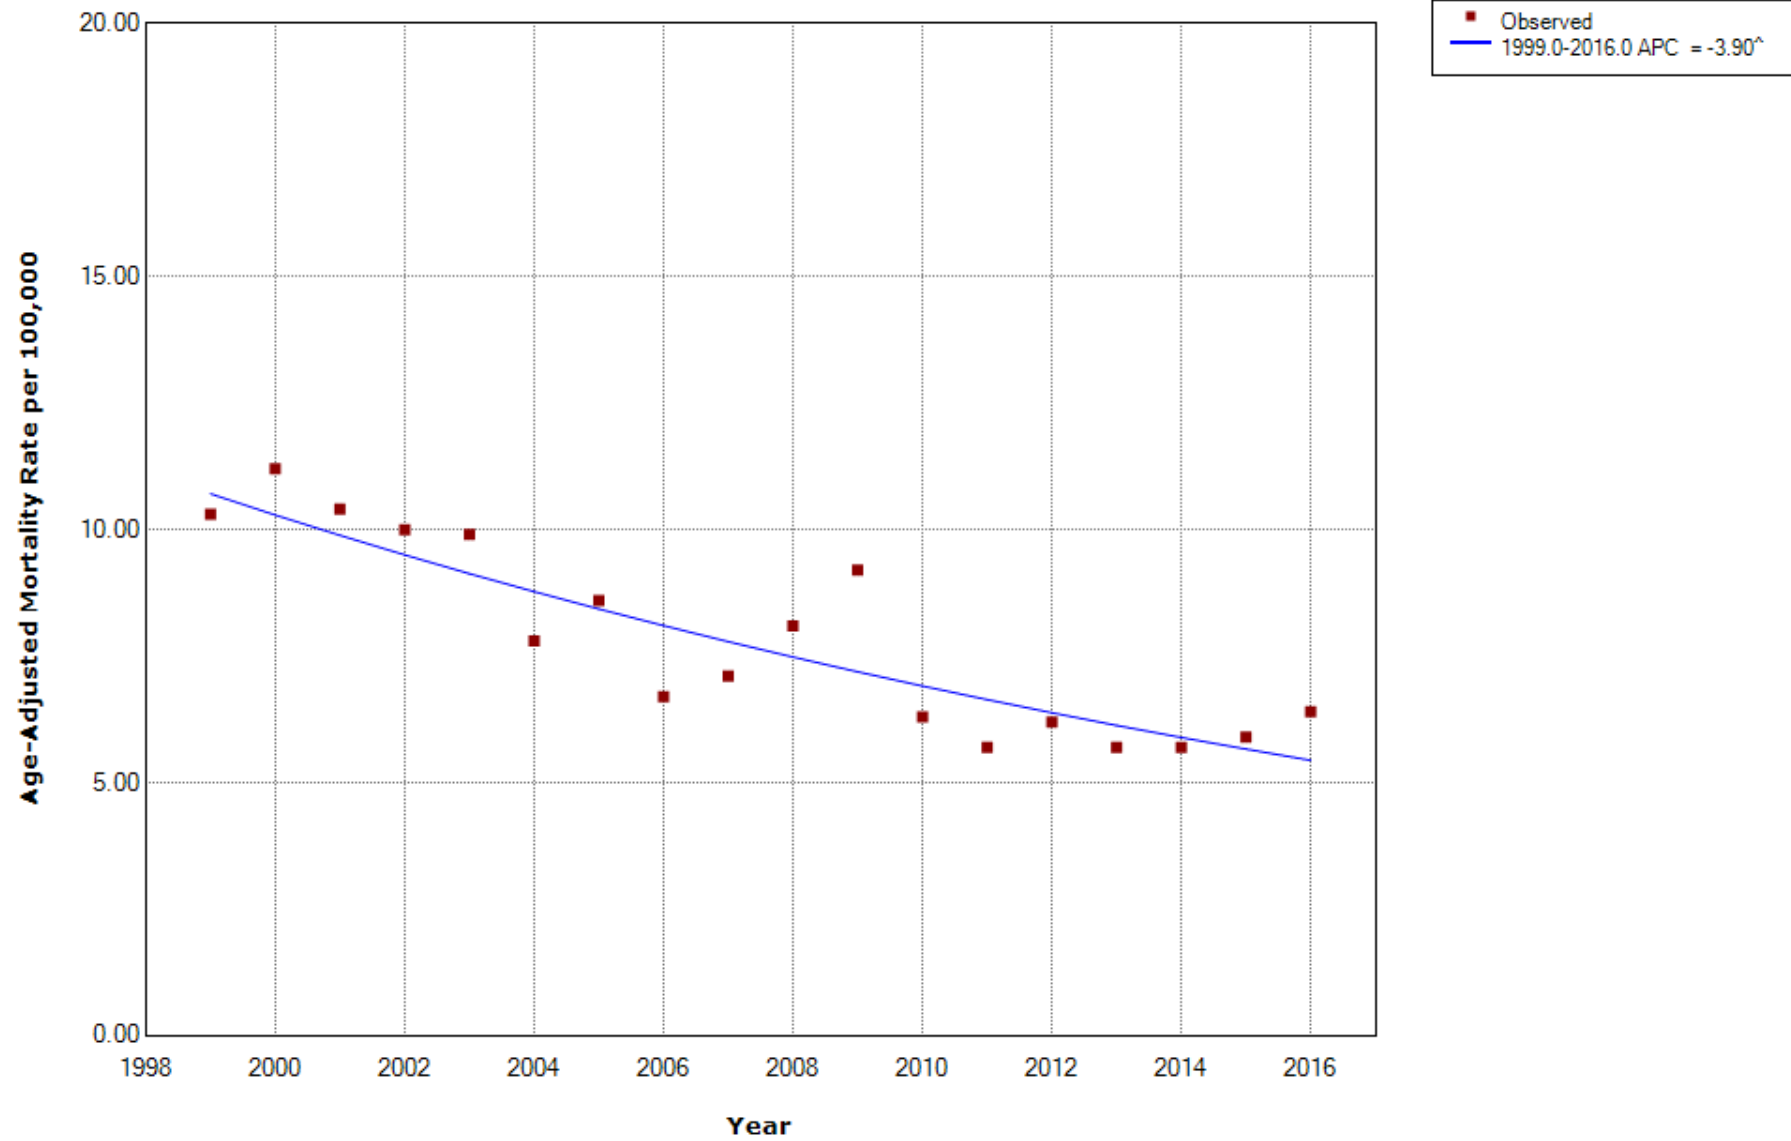

^ Indicates that the Annual Percent Change (APC) is significantly different from zero at the alpha = 0.05 level.  
Final Selected Model: 0 Joinpoints.

Symptoms, signs and abnormal clinical and laboratory findings, not elsewhere classified (R00-R99) / NH whites: 0 Joinpoints

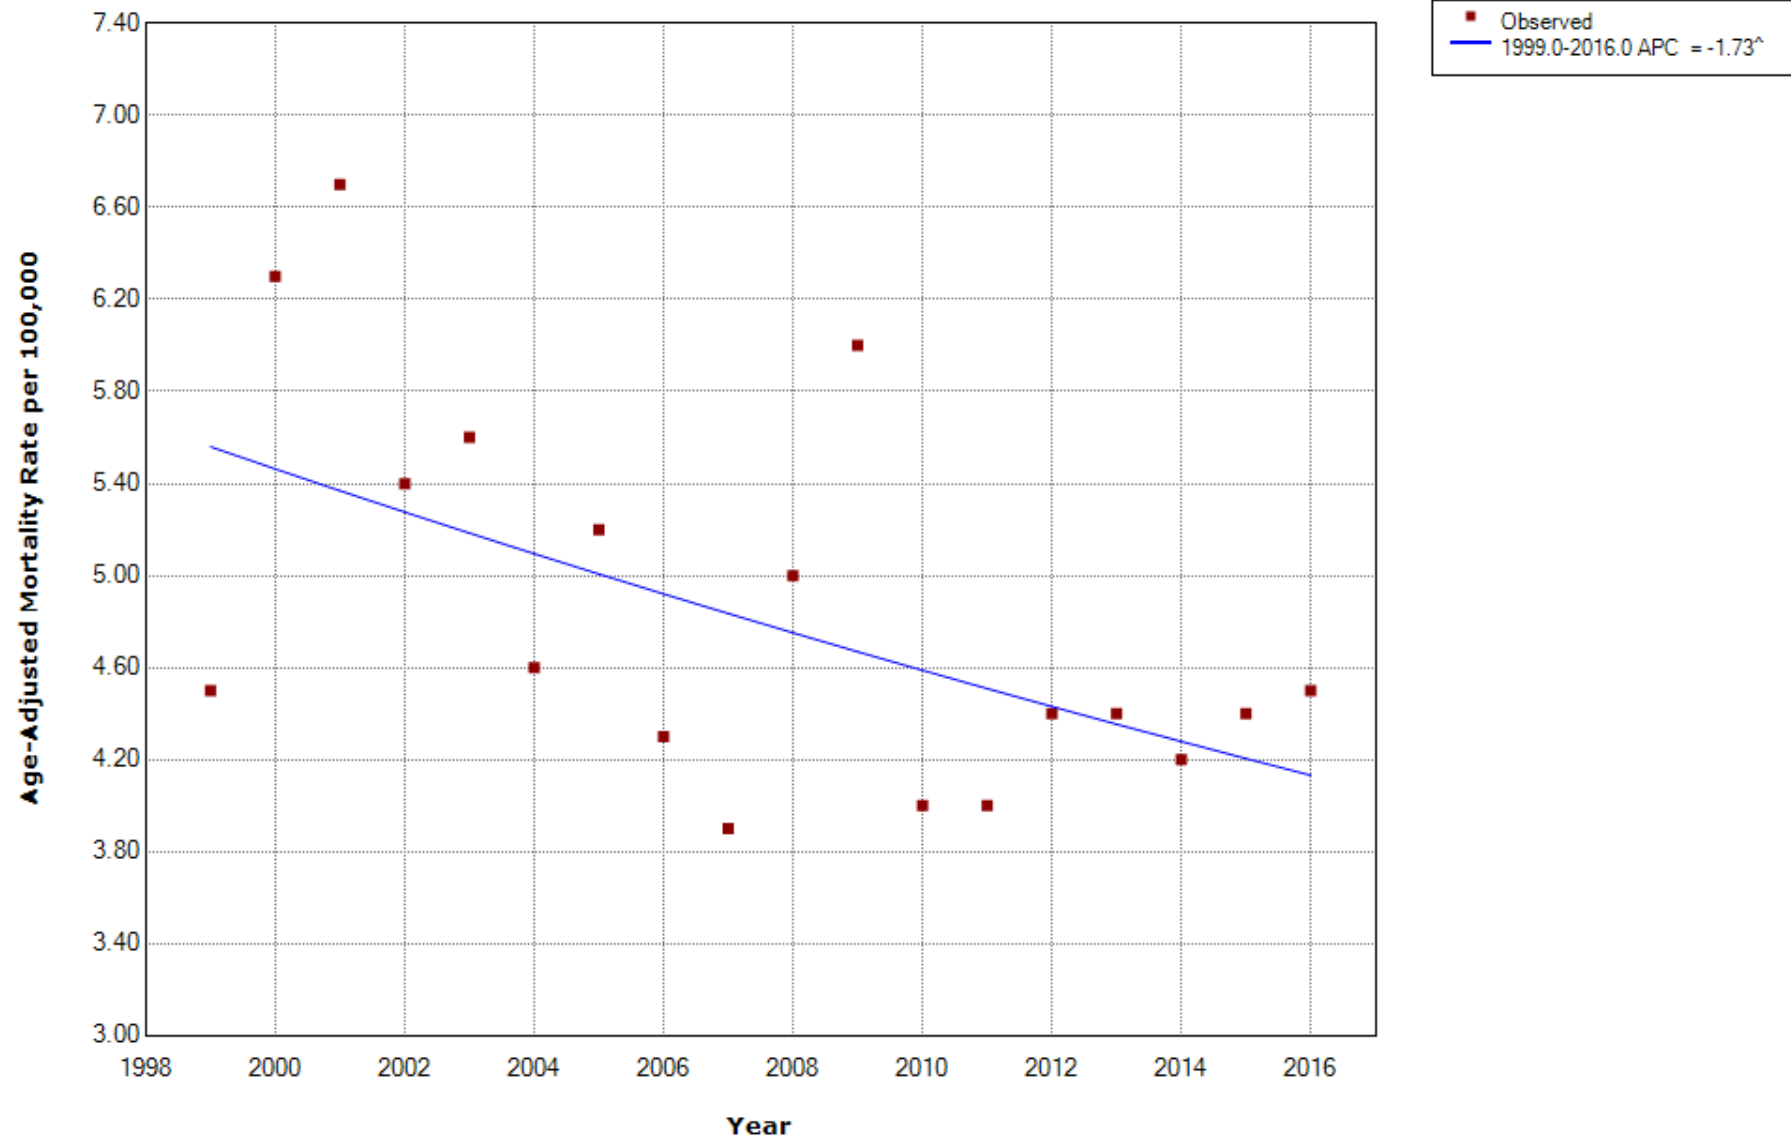

^ Indicates that the Annual Percent Change (APC) is significantly different from zero at the alpha = 0.05 level.  
Final Selected Model: 0 Joinpoints.



Symptoms, signs and abnormal clinical and laboratory findings, not elsewhere classified (R00-R99) / Hispanics: 0 Joinpoints

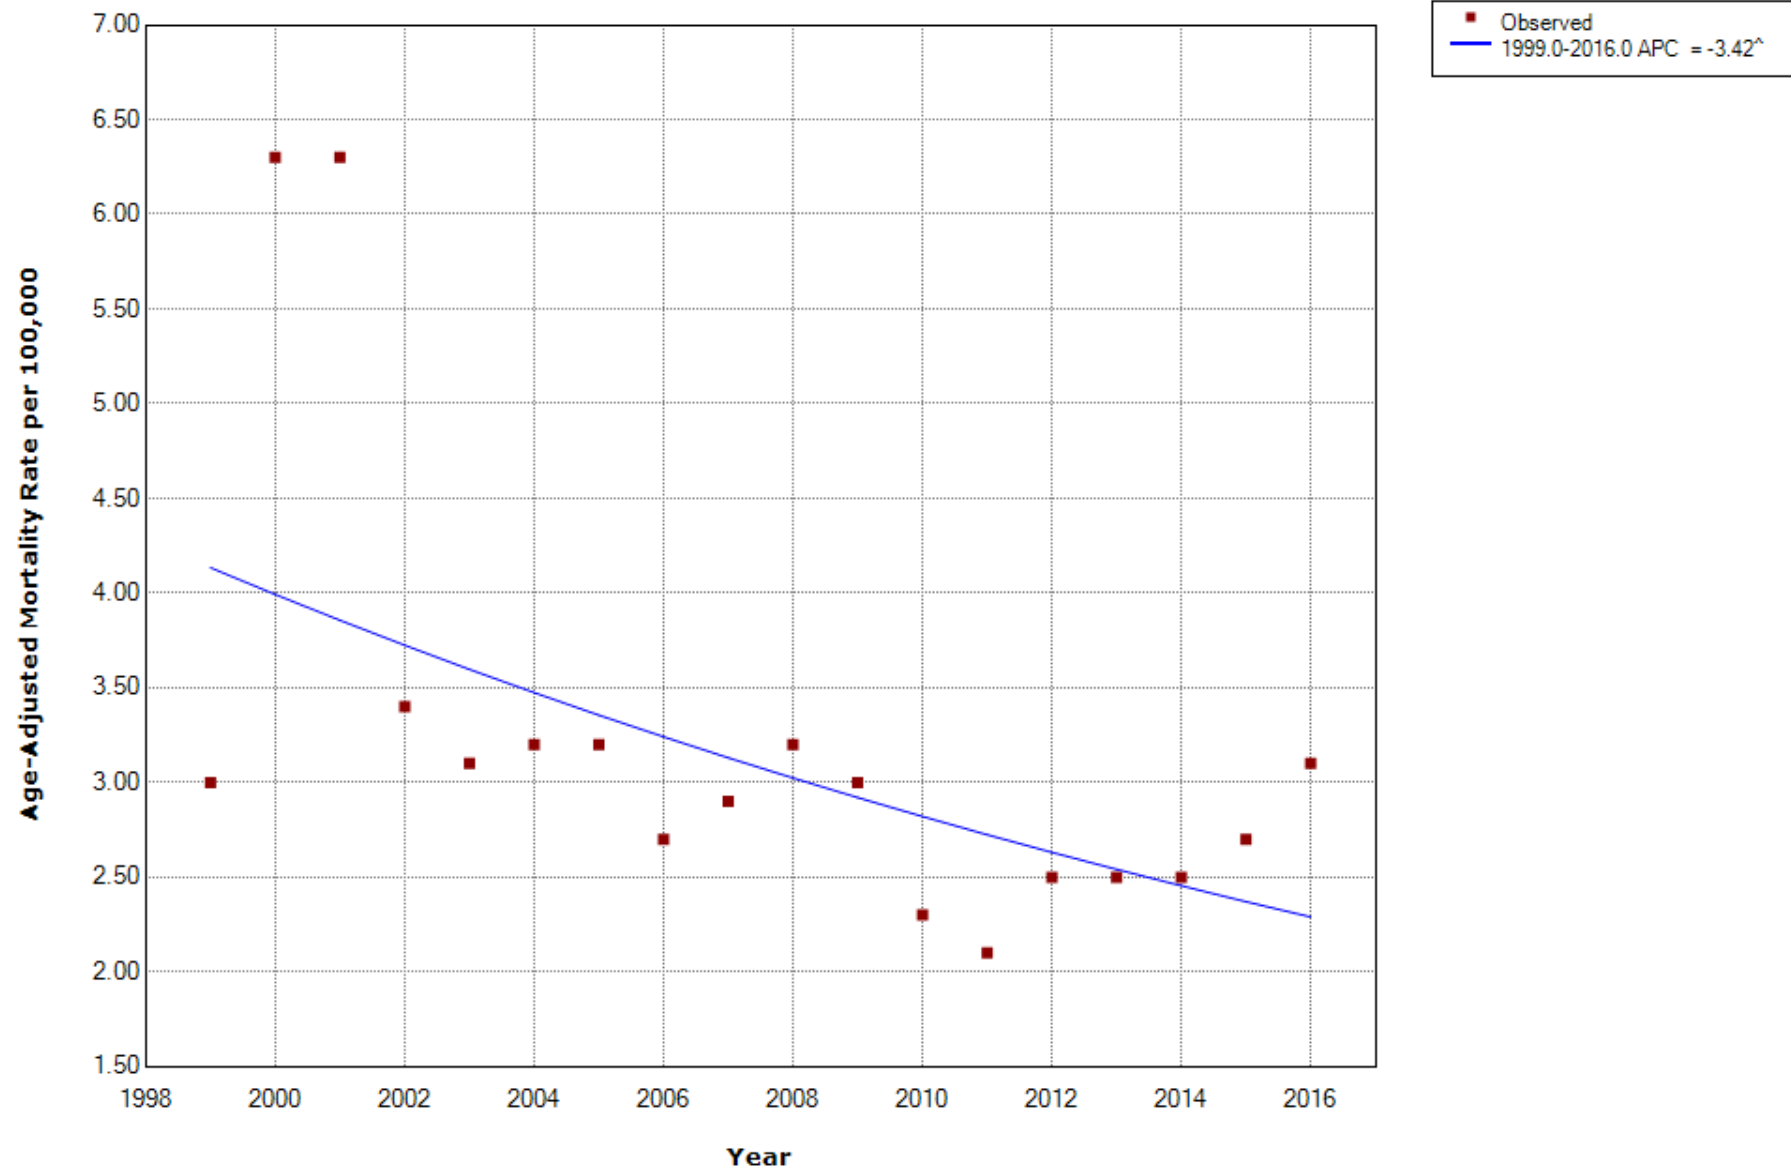

^ Indicates that the Annual Percent Change (APC) is significantly different from zero at the alpha = 0.05 level.  
Final Selected Model: 0 Joinpoints.

C00-D48 (Neoplasms) / NH AIAN: 0 Joinpoints

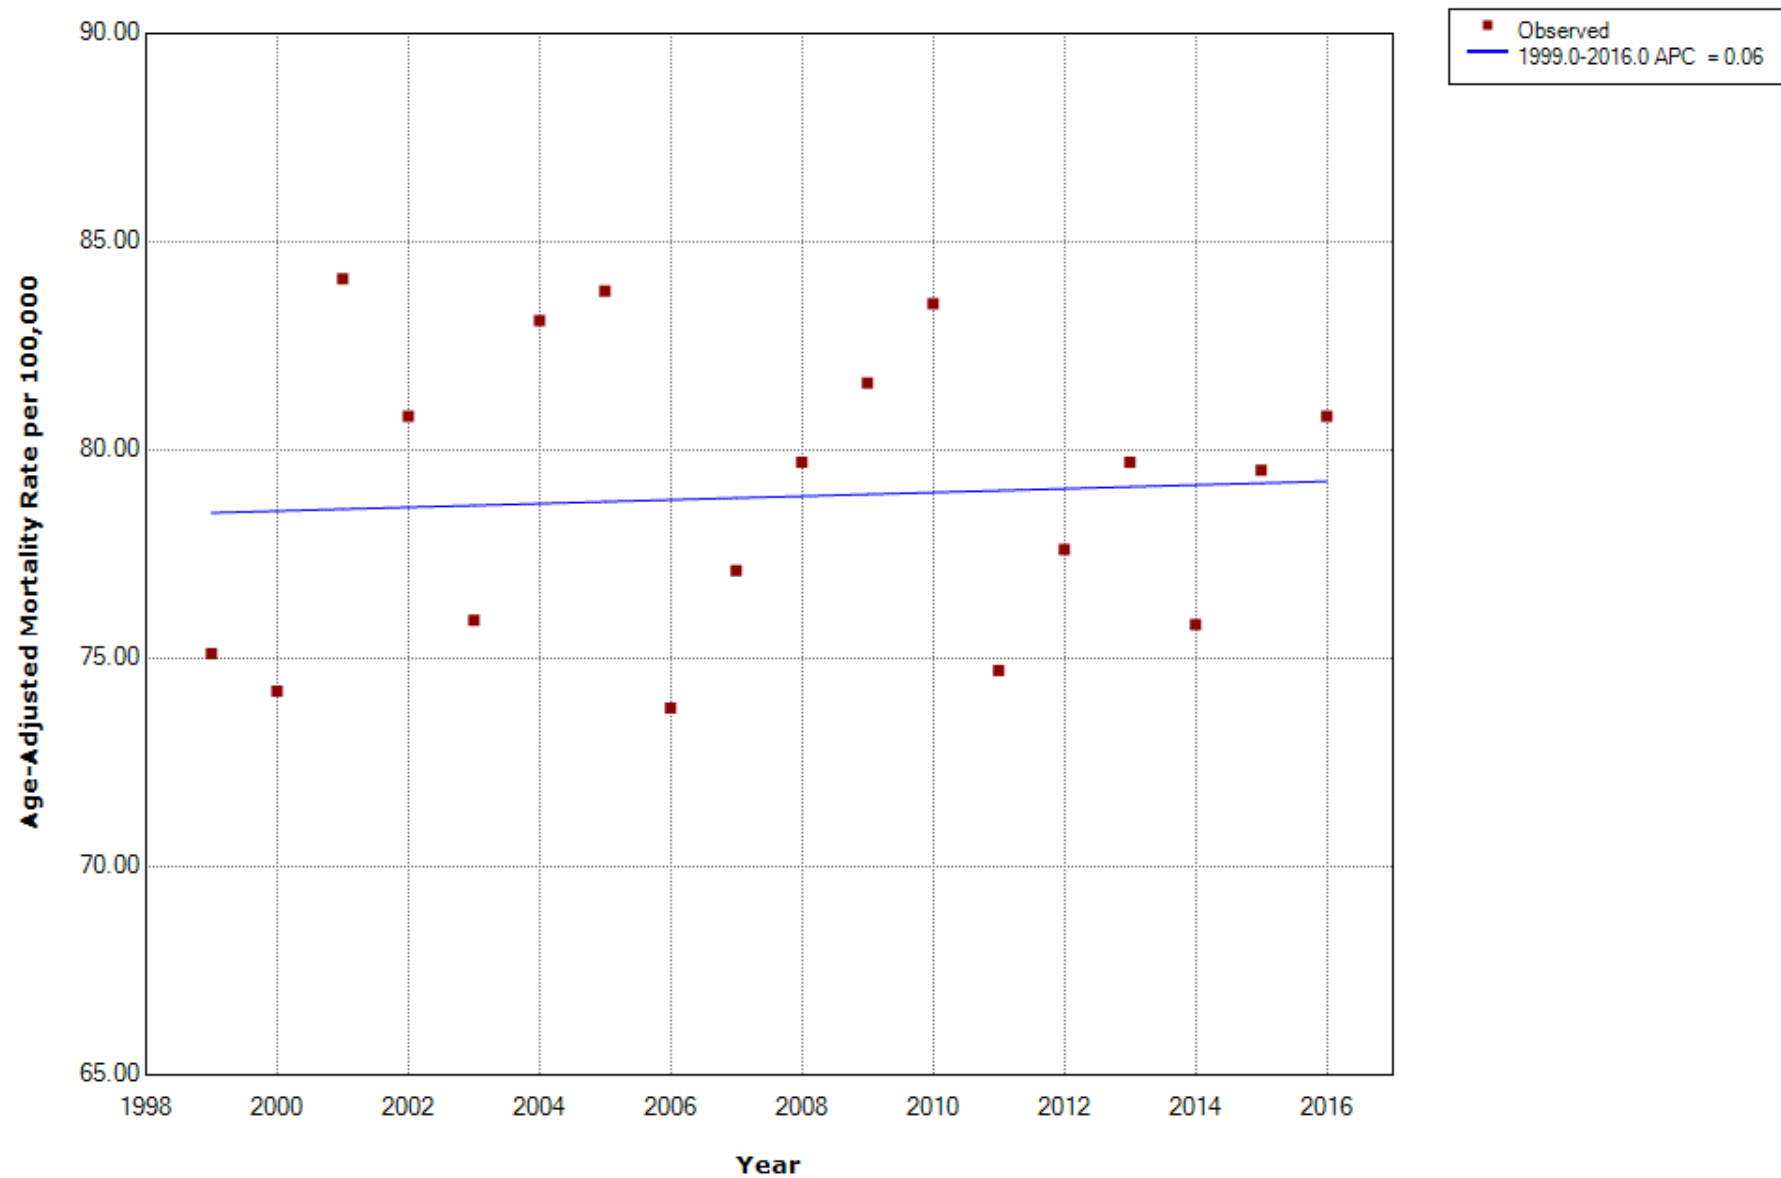

^ Indicates that the Annual Percent Change (APC) is significantly different from zero at the alpha = 0.05 level.  
Final Selected Model: 0 Joinpoints.

### C00-D48 (Neoplasms) / NH API: 1 Joinpoint

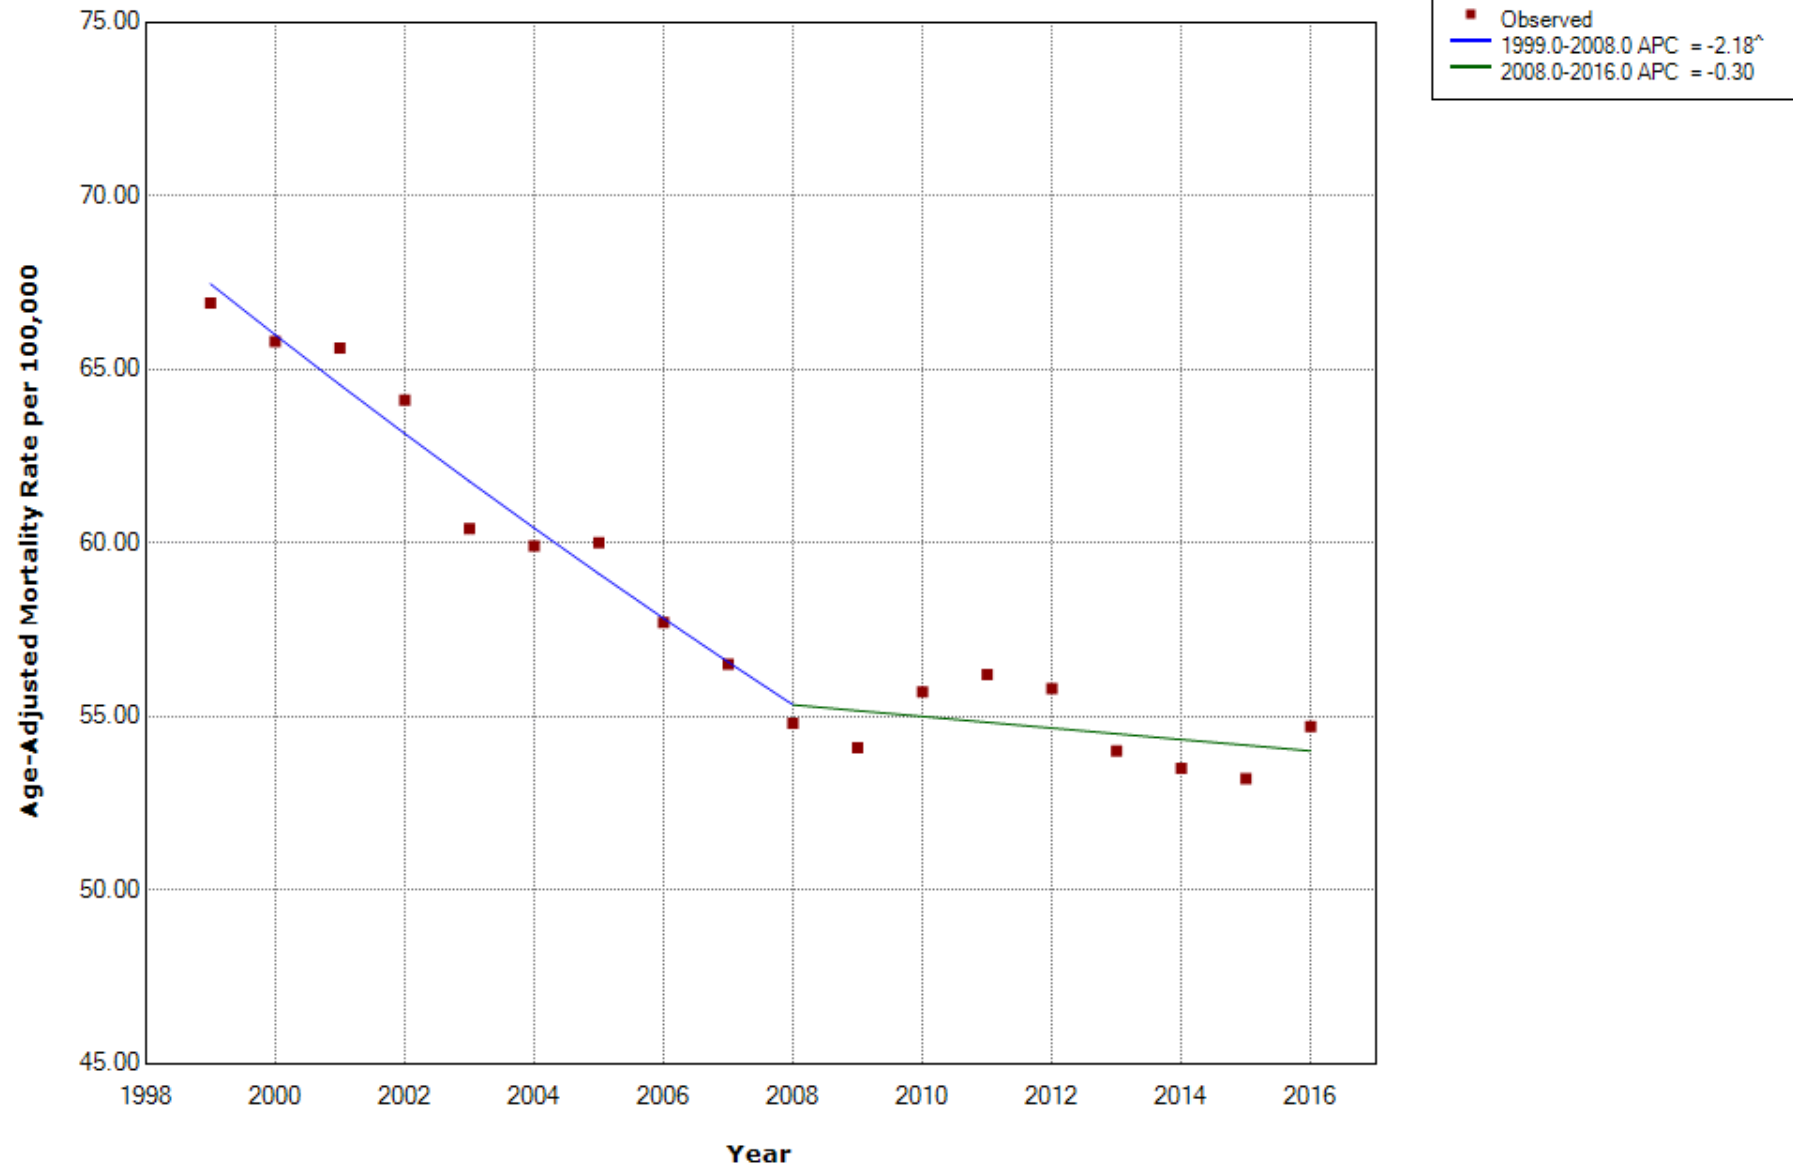

^ Indicates that the Annual Percent Change (APC) is significantly different from zero at the alpha = 0.05 level.  
Final Selected Model: 1 Joinpoint.

### C00-D48 (Neoplasms) / NH Blacks: 1 Joinpoint

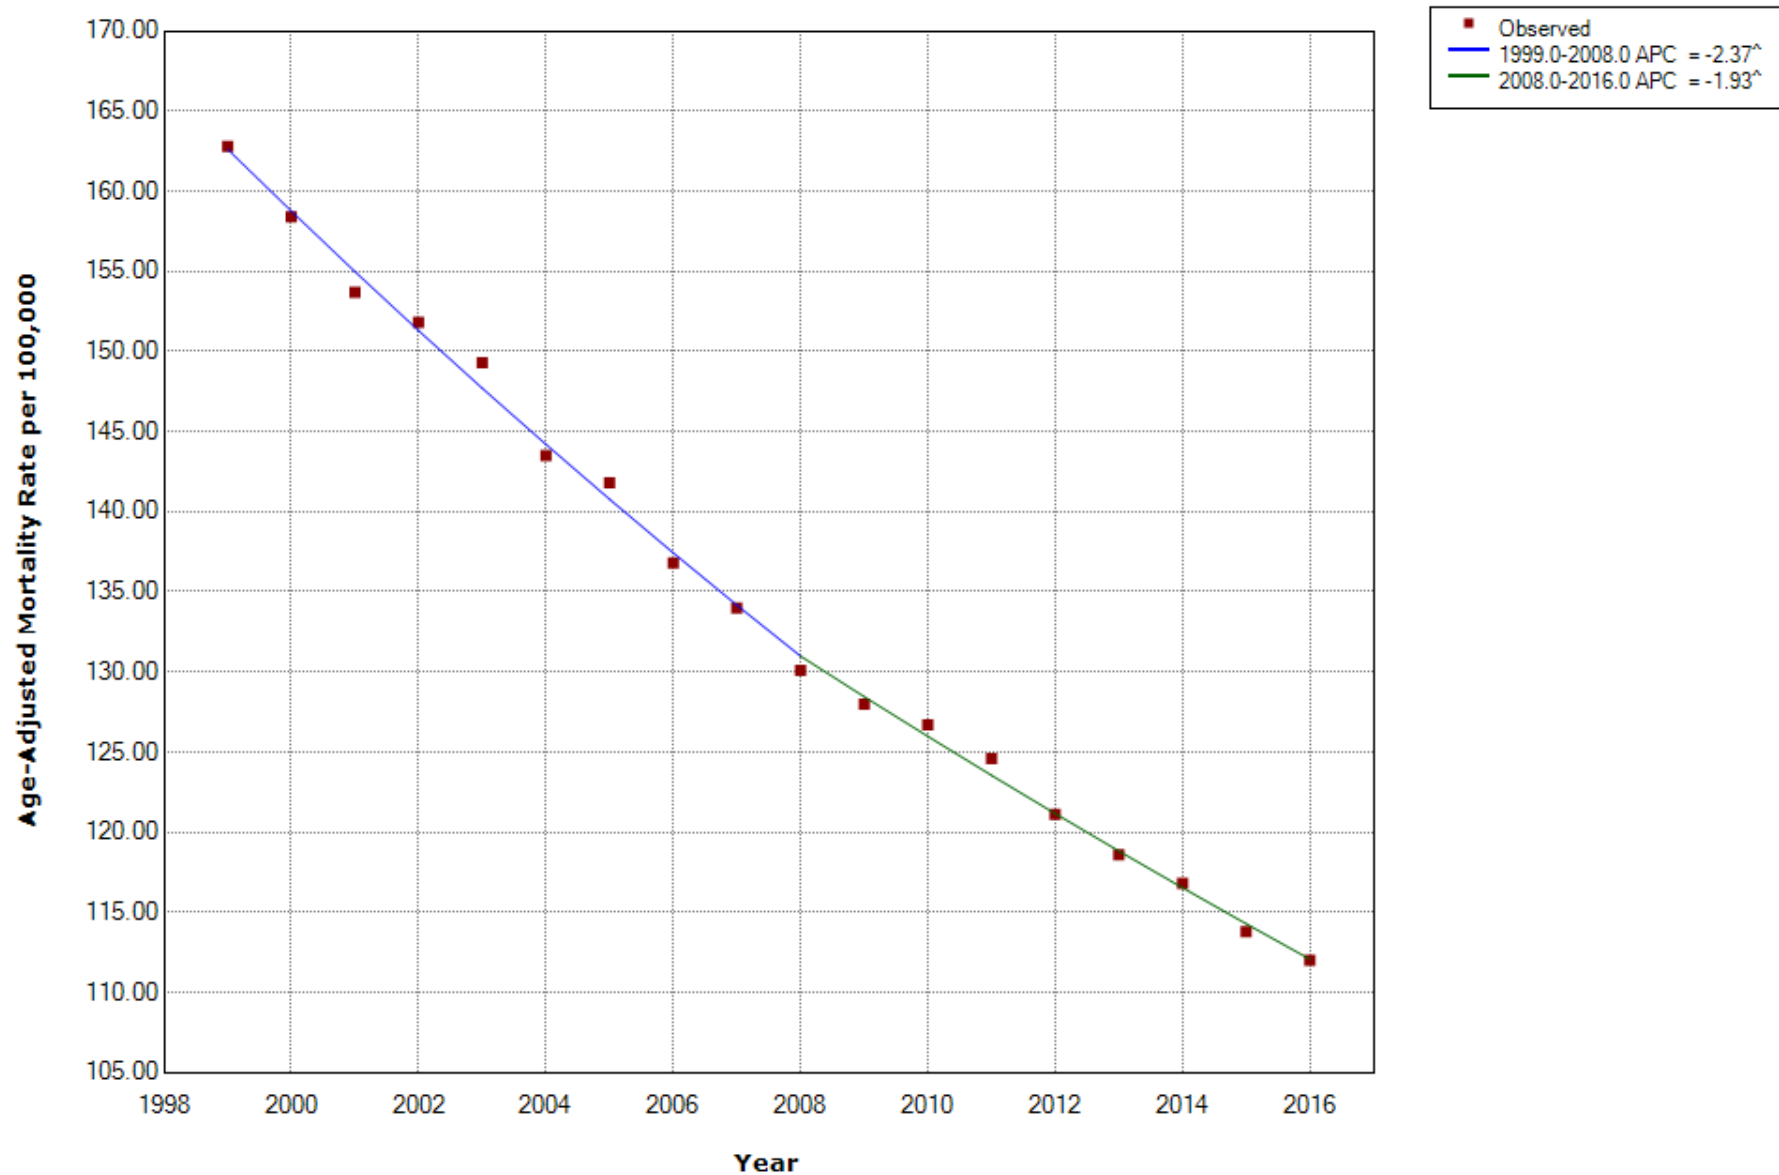

^ Indicates that the Annual Percent Change (APC) is significantly different from zero at the alpha = 0.05 level.  
Final Selected Model: 1 Joinpoint.

### C00-D48 (Neoplasms) / NH whites: 2 Joinpoints

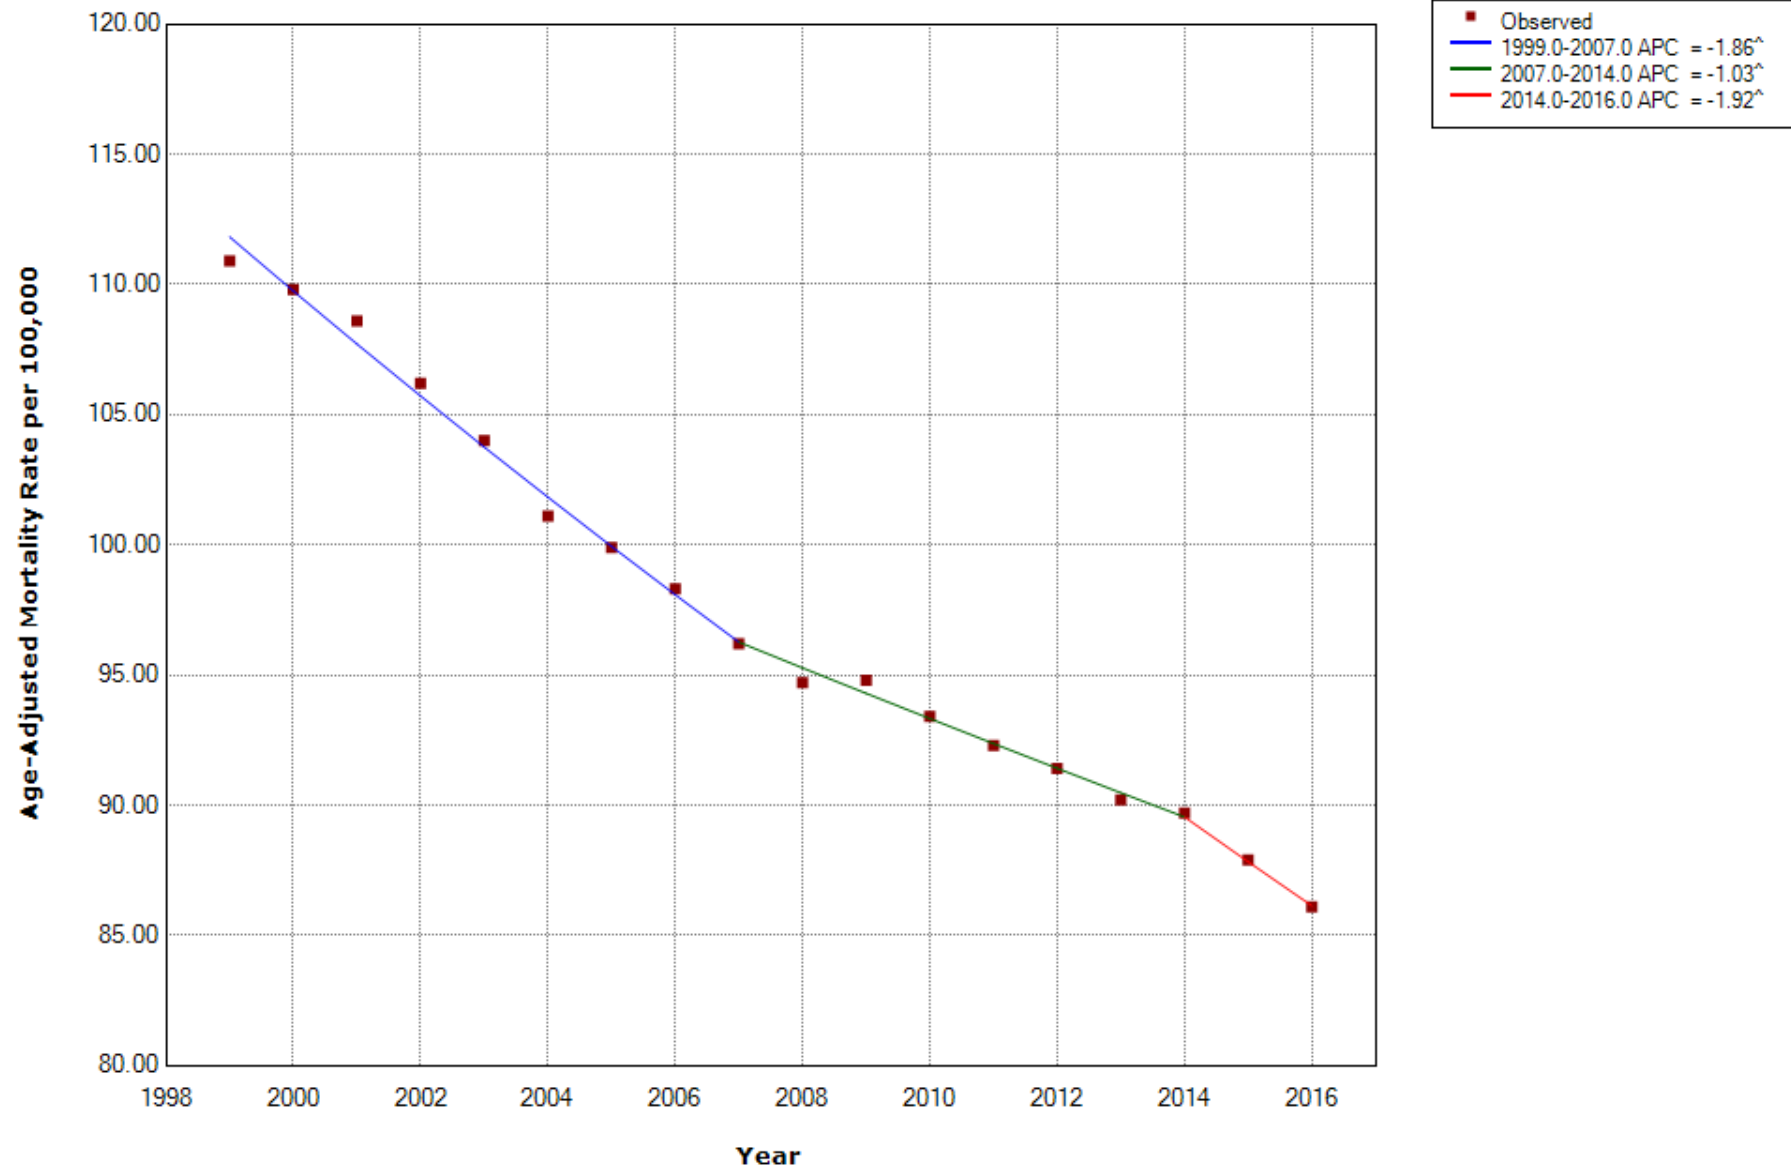

^ Indicates that the Annual Percent Change (APC) is significantly different from zero at the alpha = 0.05 level.  
Final Selected Model: 2 Joinpoints.

### C00-D48 (Neoplasms) / Hispanics: 1 Joinpoint

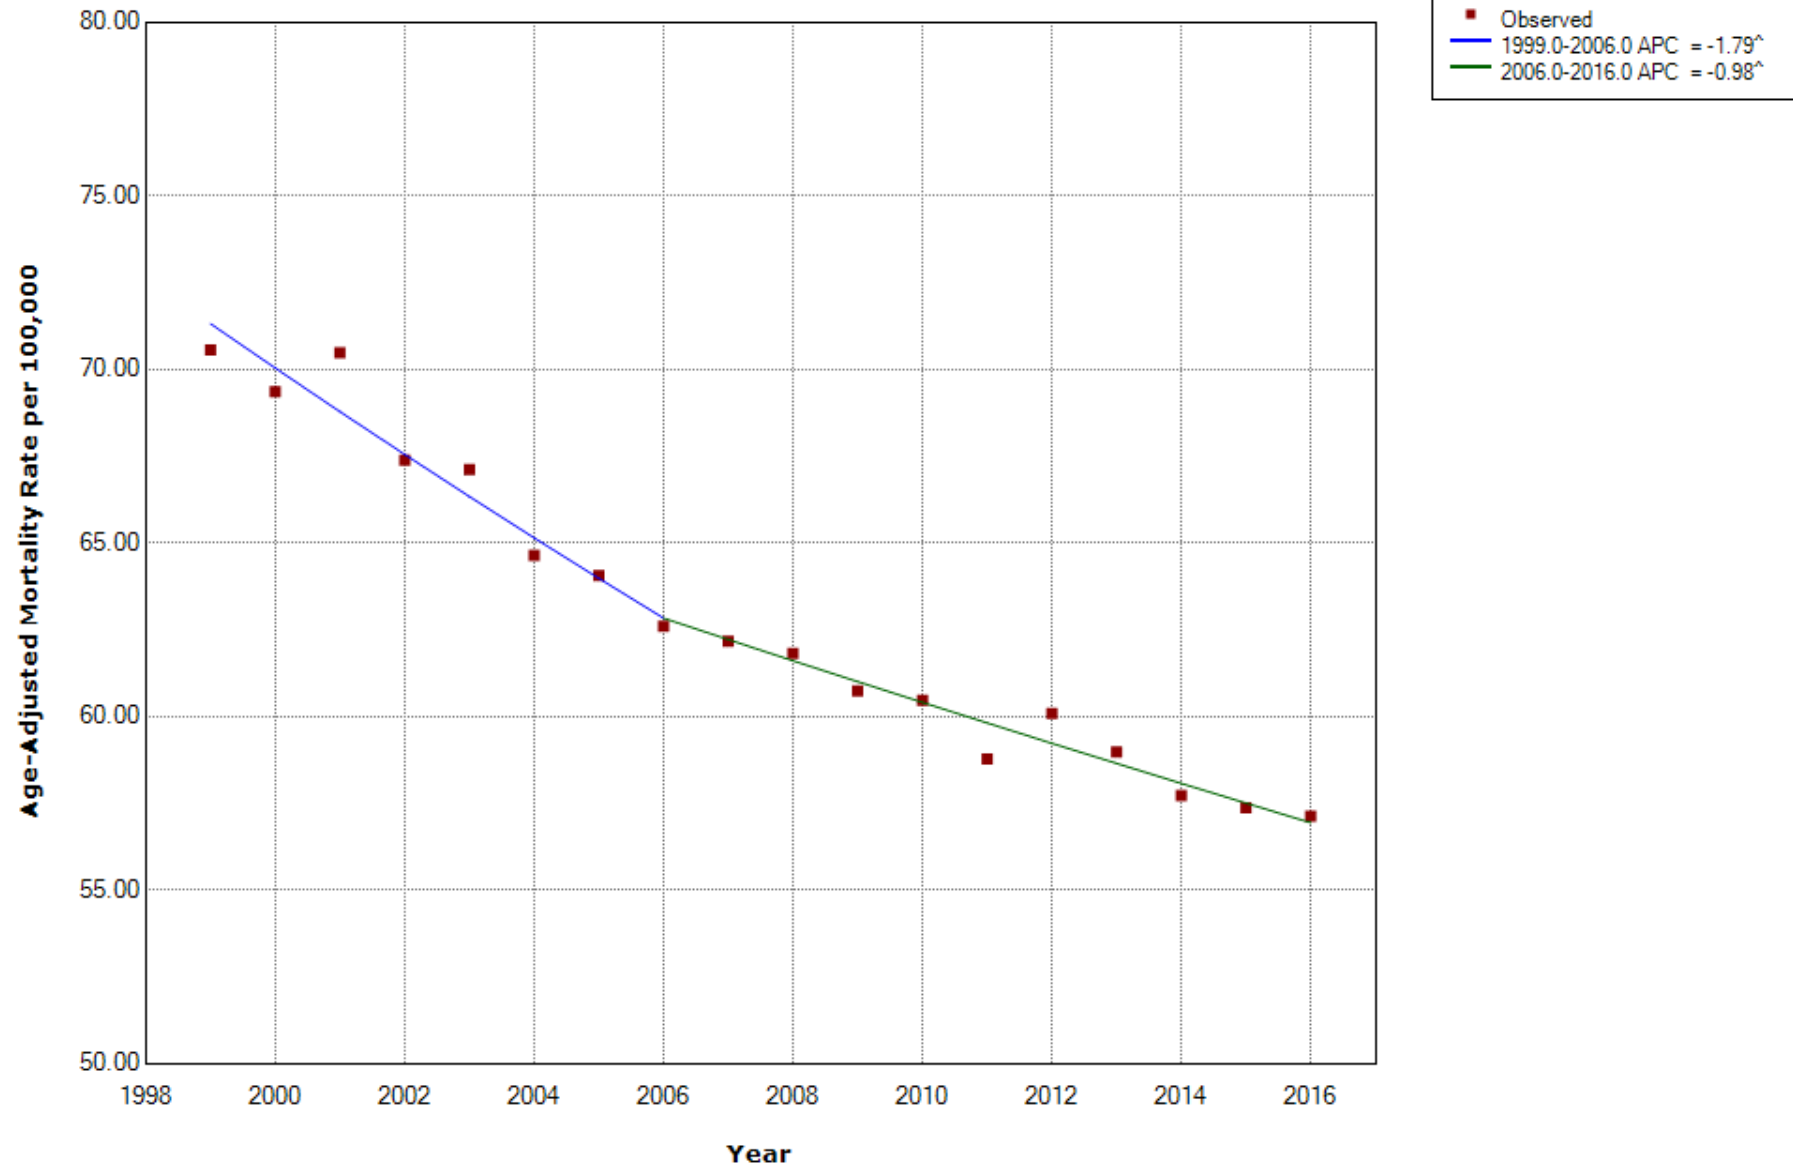

^ Indicates that the Annual Percent Change (APC) is significantly different from zero at the alpha = 0.05 level.  
Final Selected Model: 1 Joinpoint.

A00-B99 (Certain infectious and parasitic diseases) / NH AIAN: 1 Joinpoint

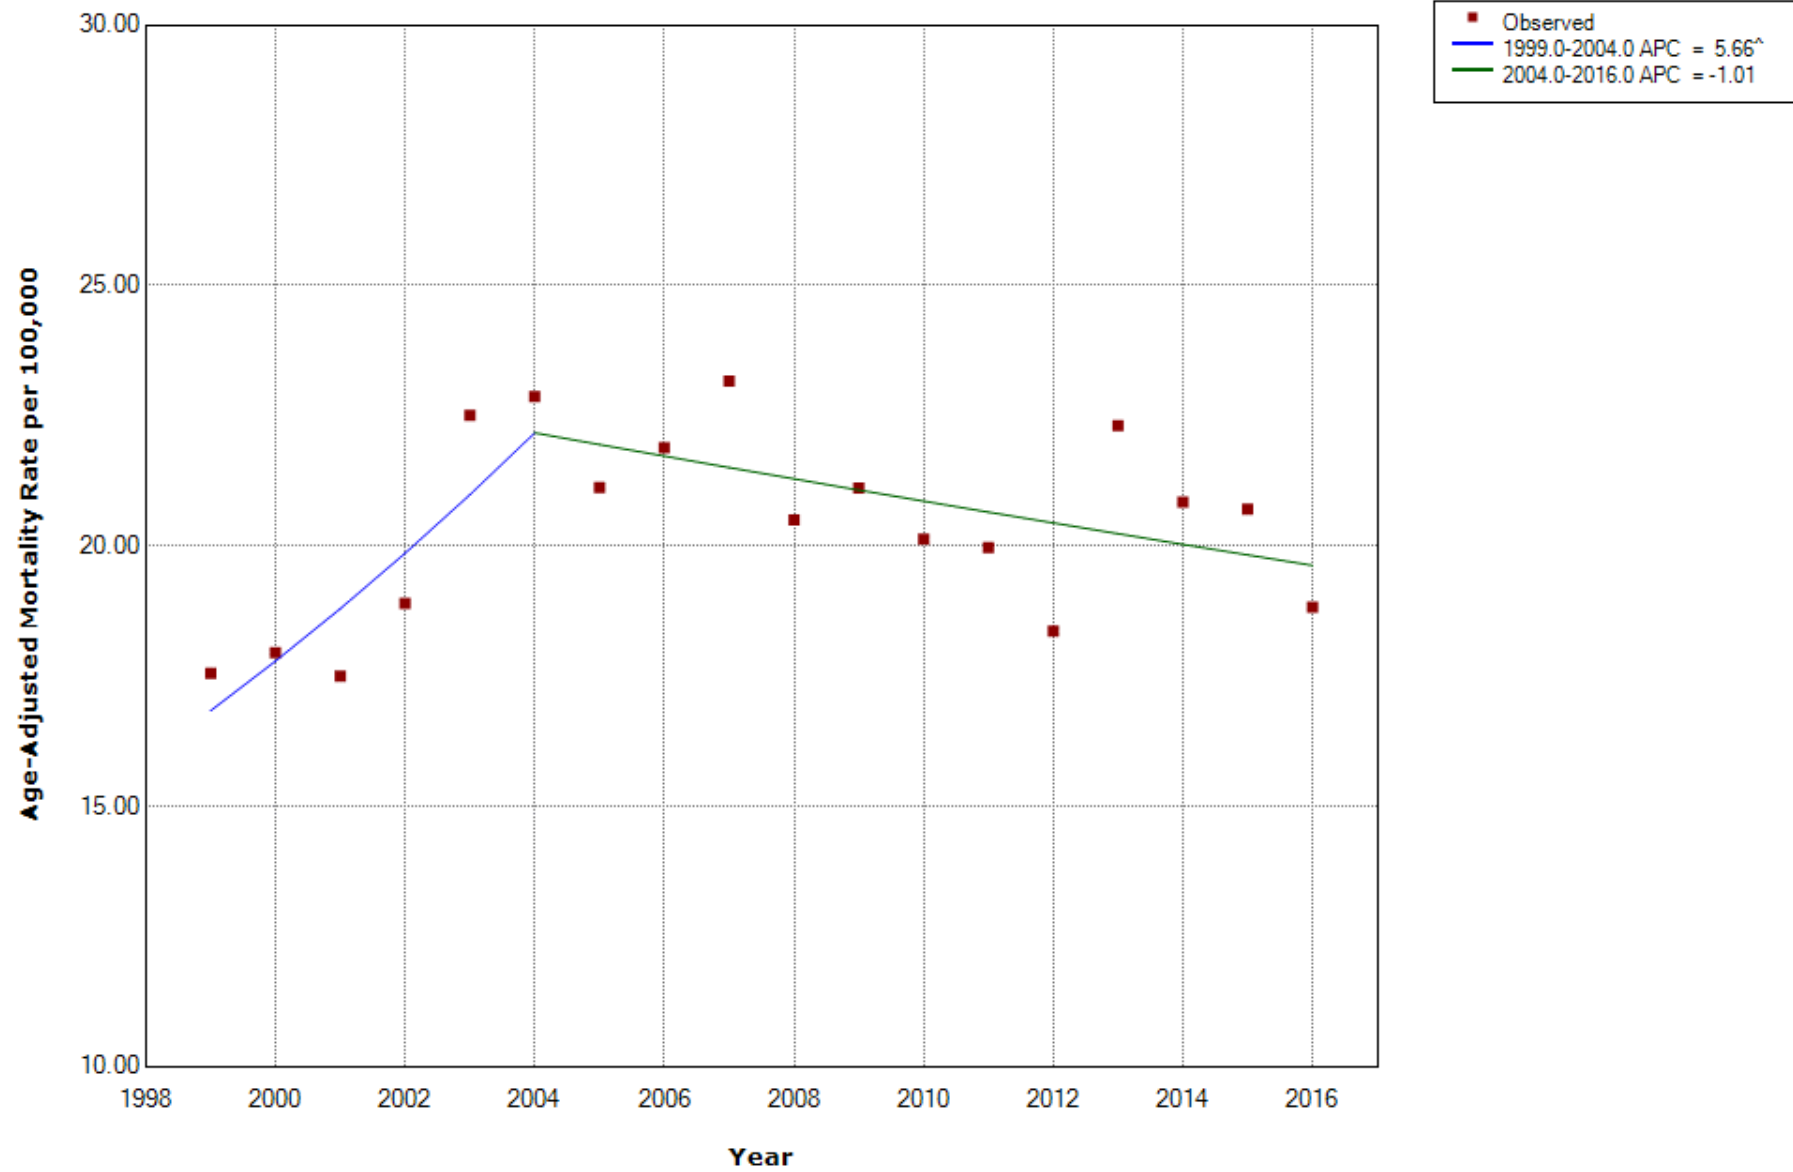

^ Indicates that the Annual Percent Change (APC) is significantly different from zero at the alpha = 0.05 level.  
Final Selected Model: 1 Joinpoint.

A00-B99 (Certain infectious and parasitic diseases) / NH API: 0 Joinpoints

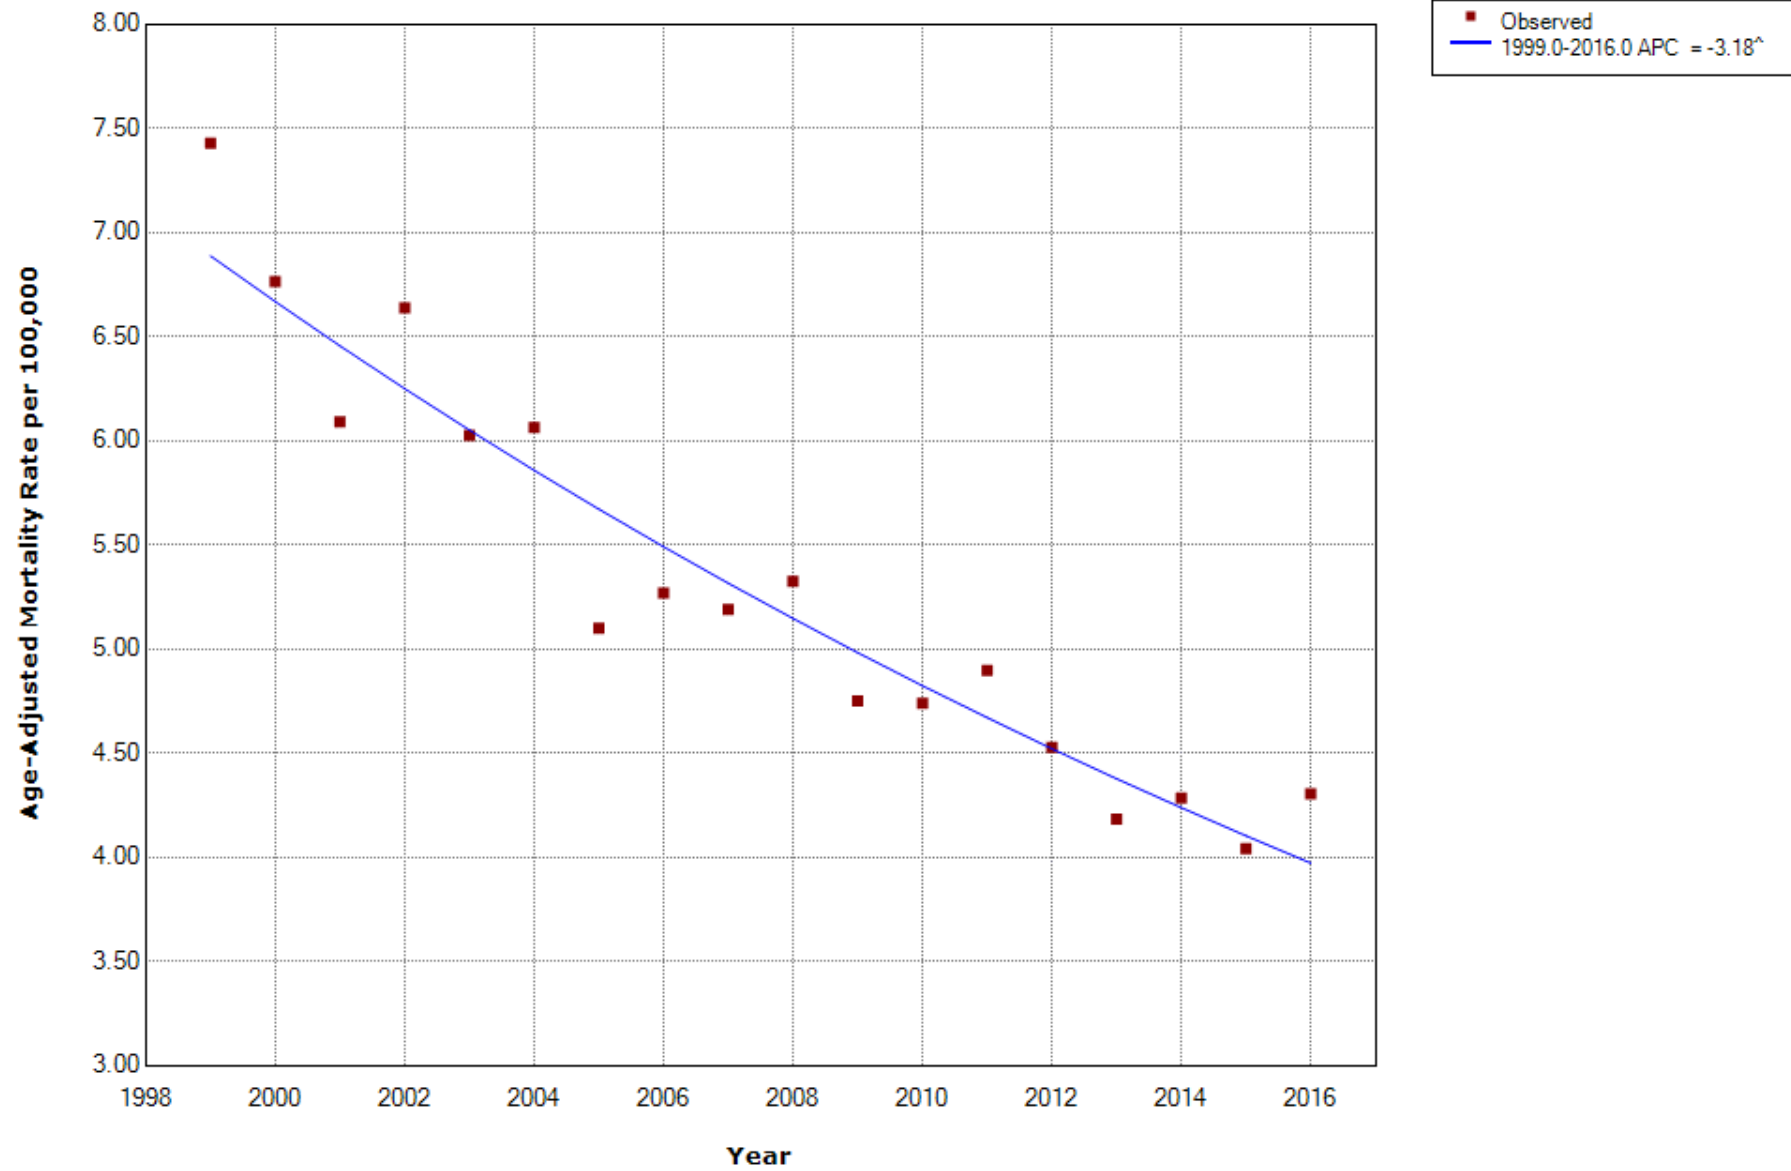

^ Indicates that the Annual Percent Change (APC) is significantly different from zero at the alpha = 0.05 level.  
Final Selected Model: 0 Joinpoints.



A00-B99 (Certain infectious and parasitic diseases) / NH Blacks: 3 Joinpoints

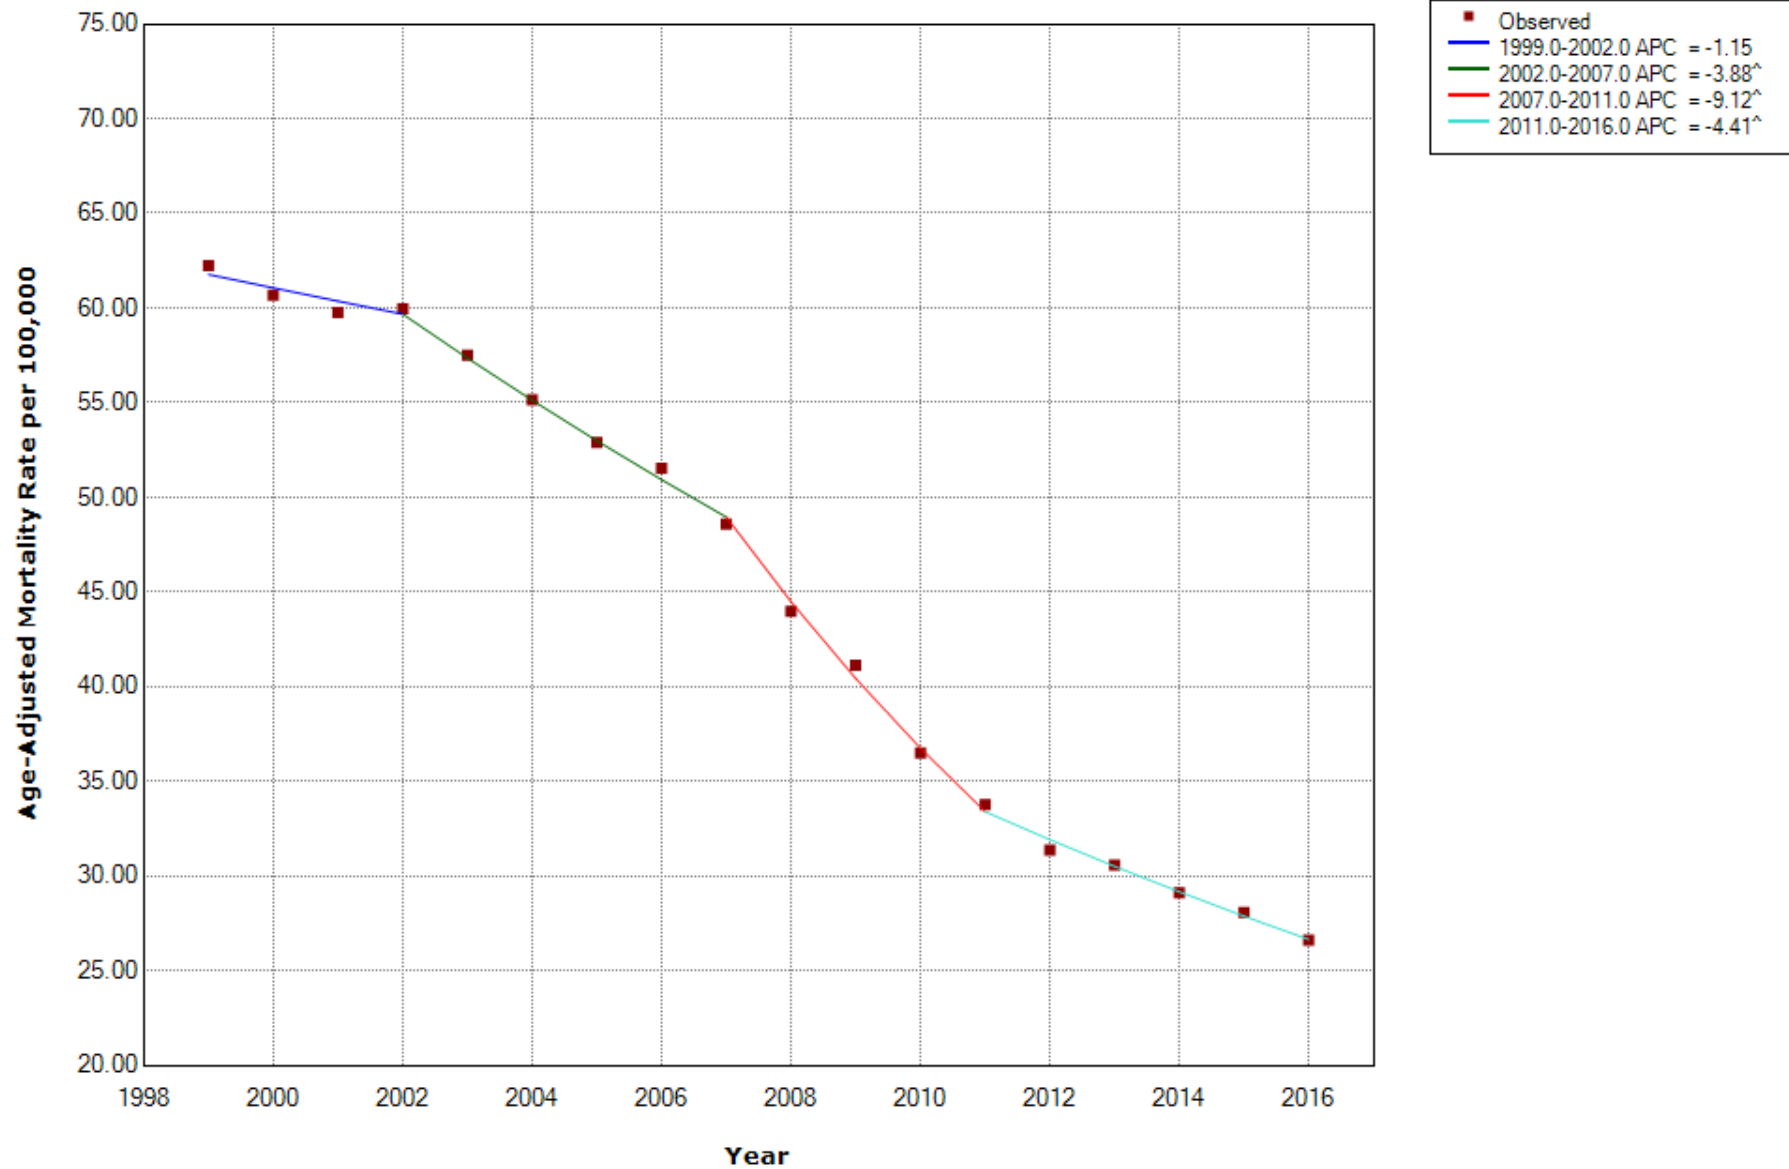

<sup>^</sup> Indicates that the Annual Percent Change (APC) is significantly different from zero at the alpha = 0.05 level.  
Final Selected Model: 3 Joinpoints.

A00-B99 (Certain infectious and parasitic diseases) / NH whites: 3 Joinpoints

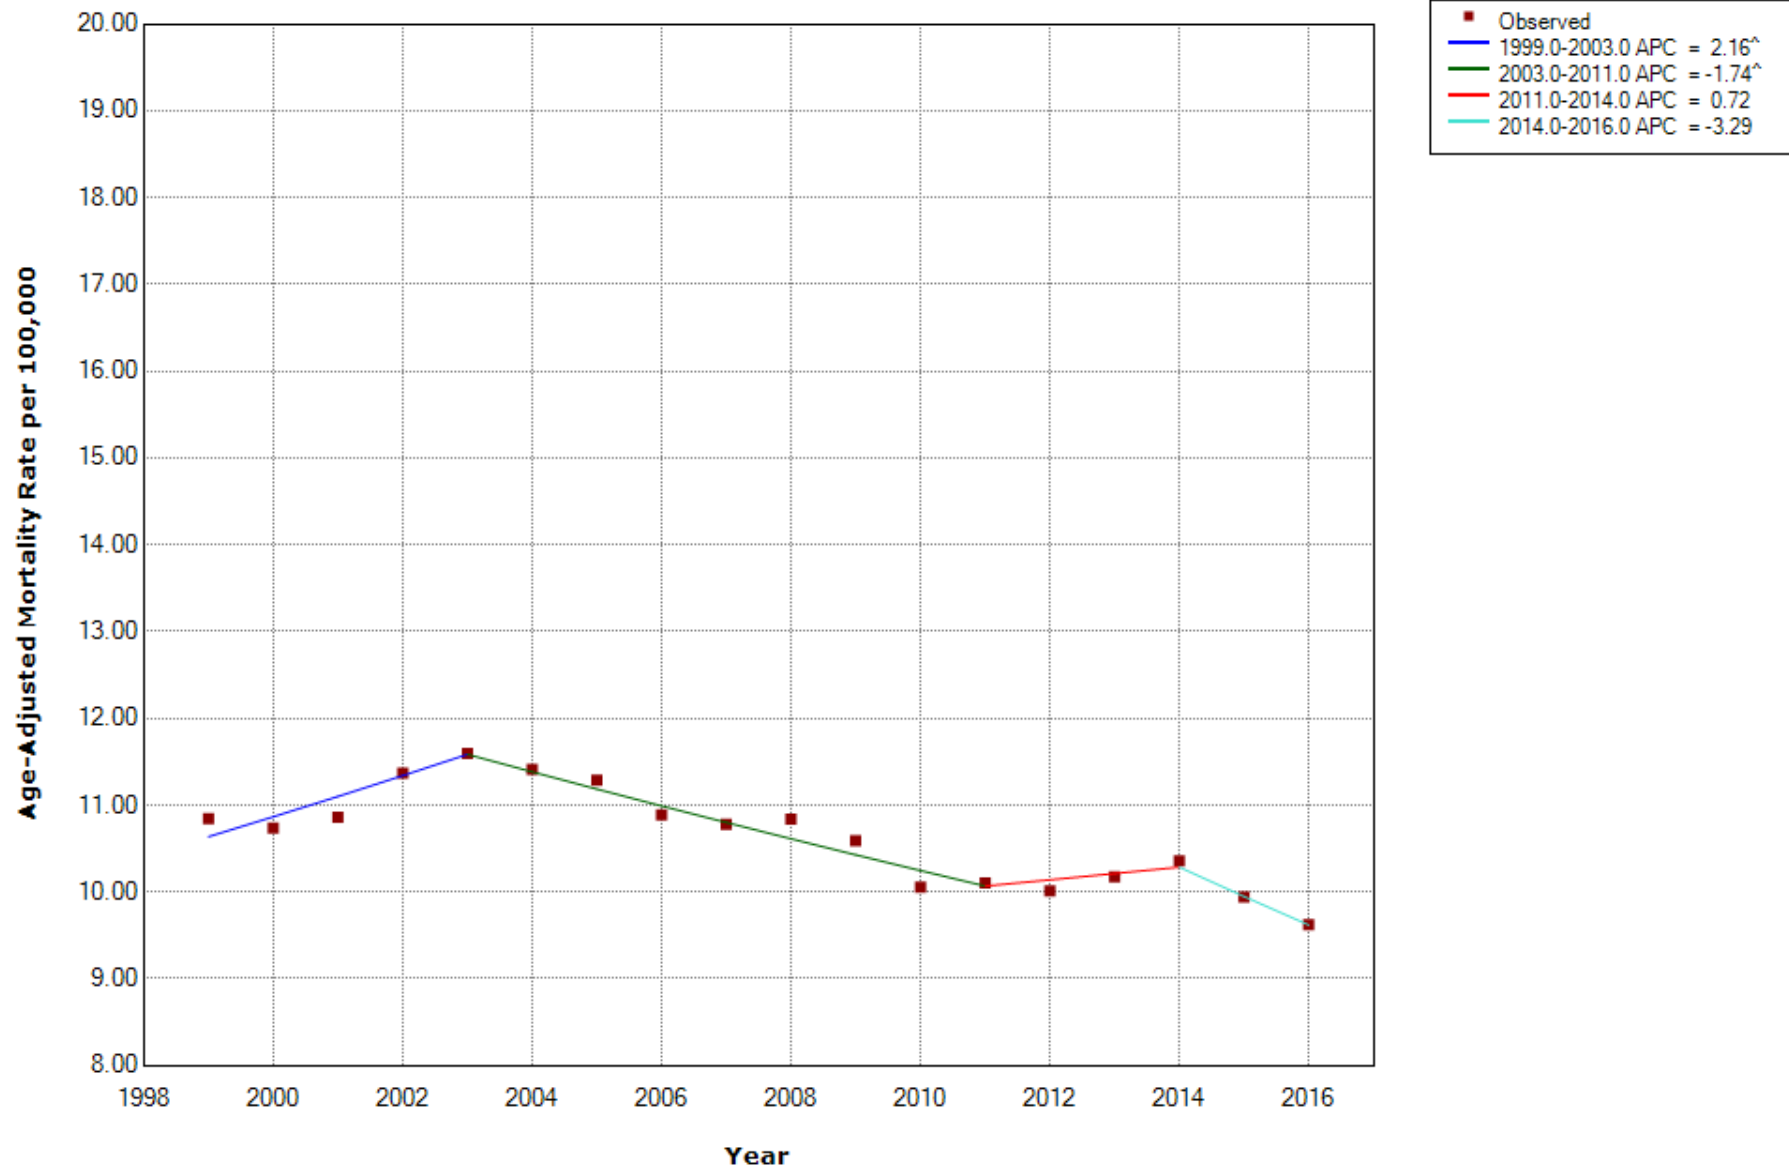

<sup>^</sup> Indicates that the Annual Percent Change (APC) is significantly different from zero at the alpha = 0.05 level.  
Final Selected Model: 3 Joinpoints.

A00-B99 (Certain infectious and parasitic diseases) / Hispanics: 1 Joinpoint

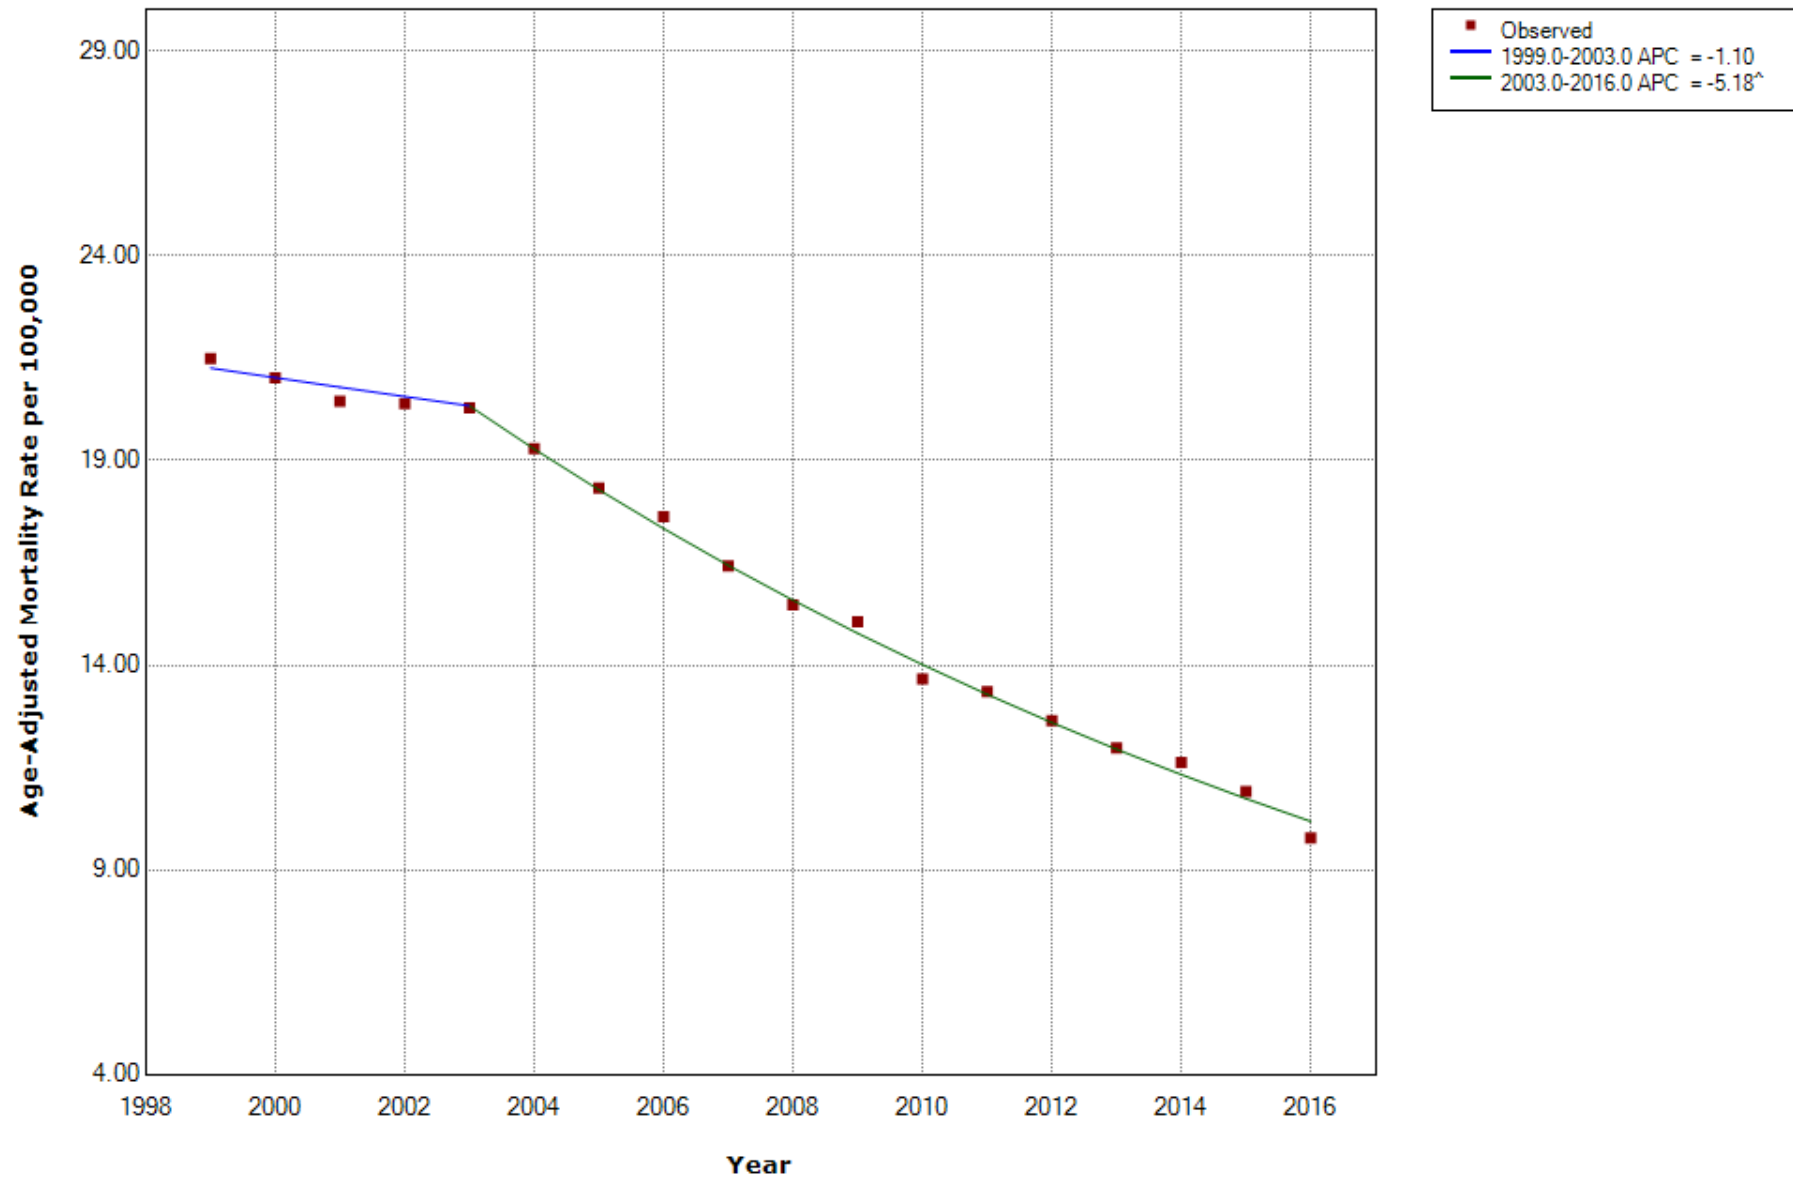

^ Indicates that the Annual Percent Change (APC) is significantly different from zero at the alpha = 0.05 level.  
Final Selected Model: 1 Joinpoint.

M00-M99 (Diseases of the musculoskeletal system and connective tissue) / NH AIAN: 0 Joinpoints

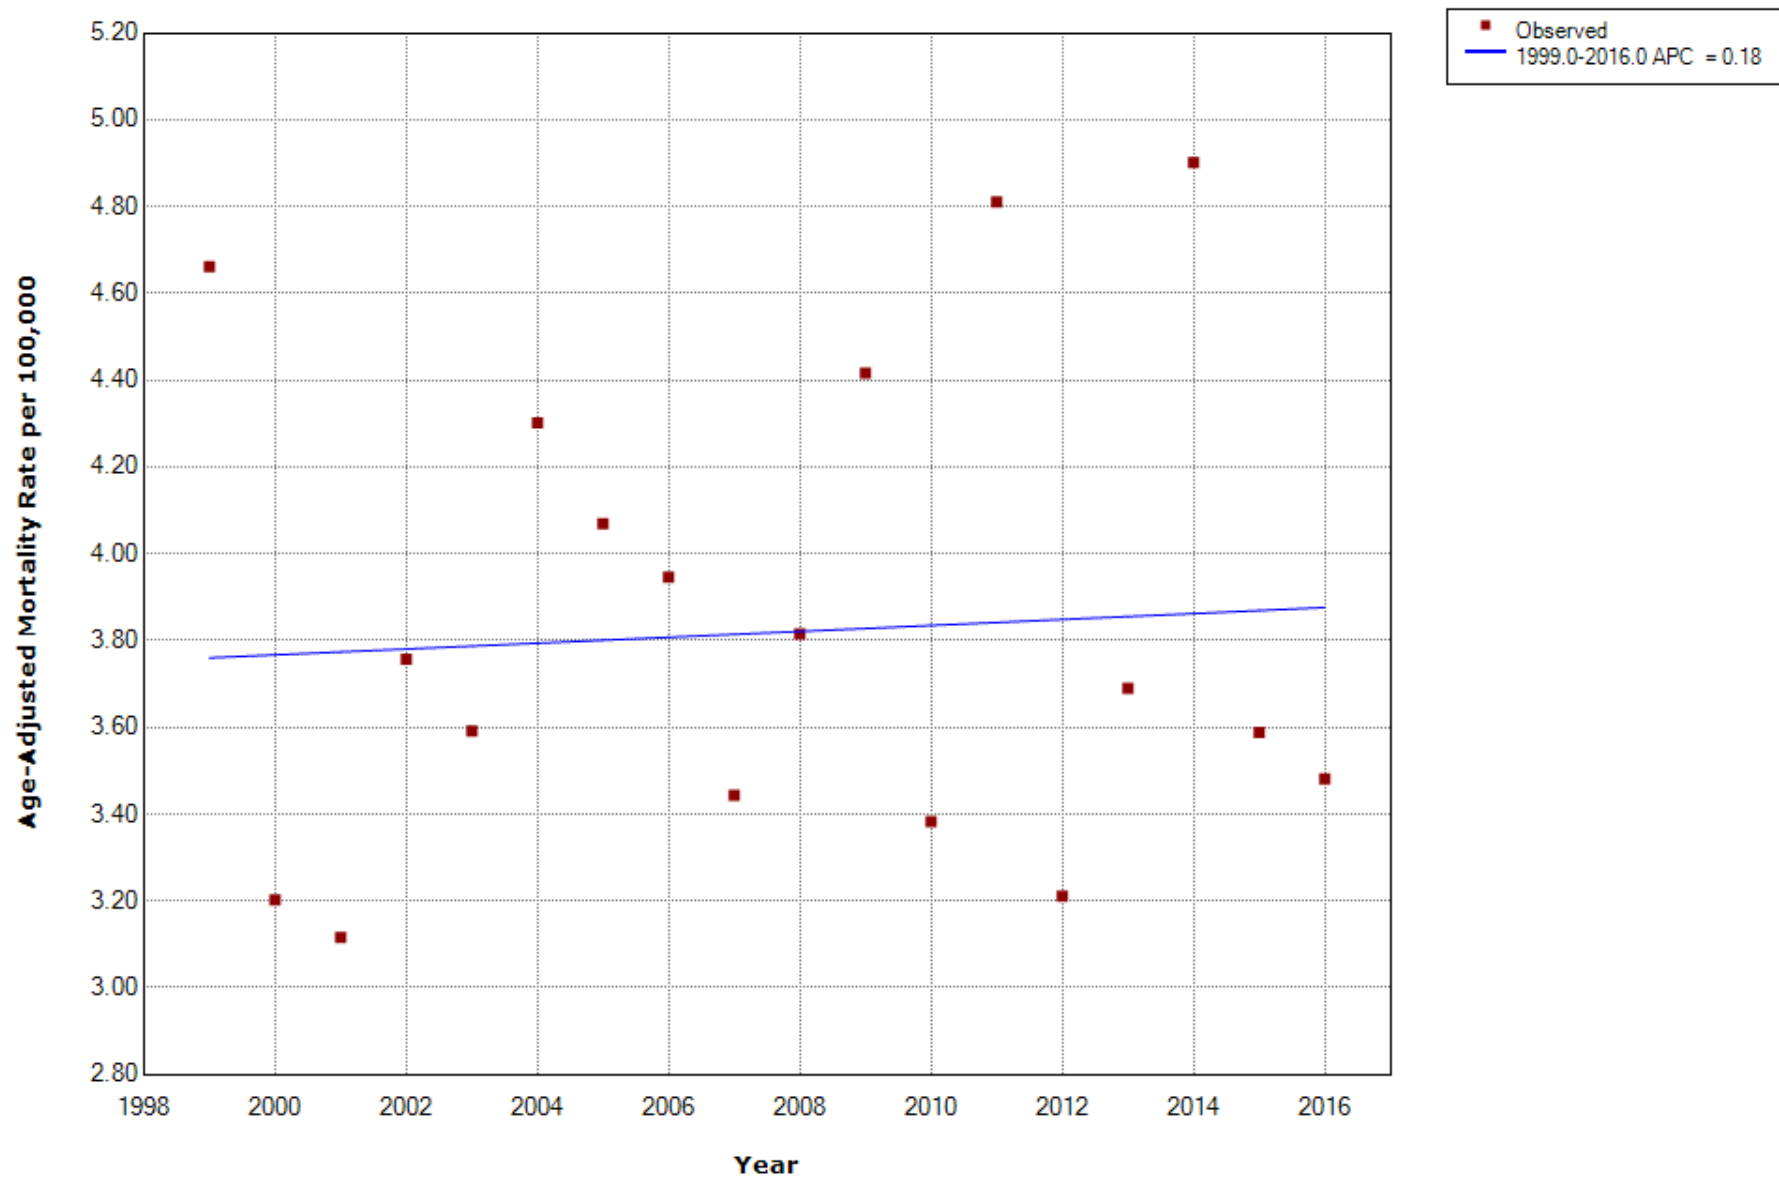

^ Indicates that the Annual Percent Change (APC) is significantly different from zero at the alpha = 0.05 level.  
Final Selected Model: 0 Joinpoints.

M00-M99 (Diseases of the musculoskeletal system and connective tissue) / NH API: 0 Joinpoints

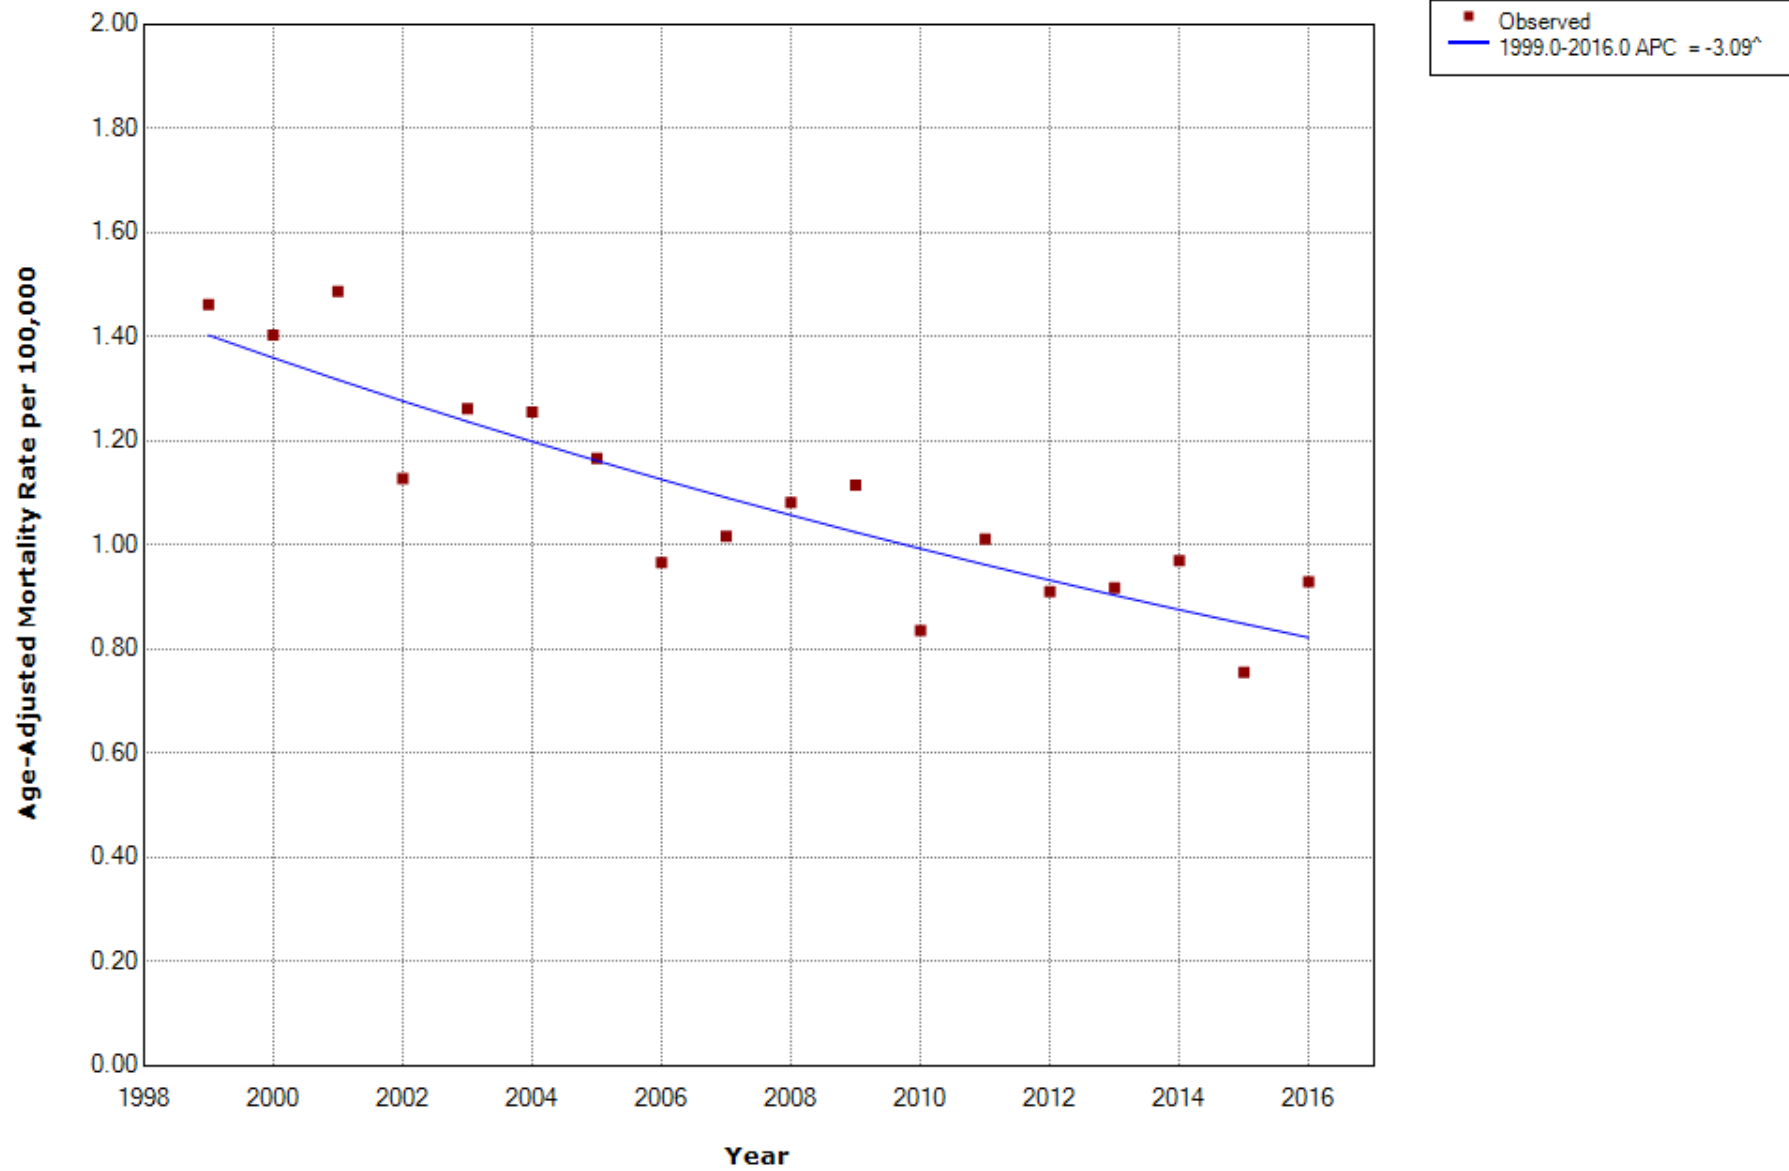

^ Indicates that the Annual Percent Change (APC) is significantly different from zero at the alpha = 0.05 level.  
Final Selected Model: 0 Joinpoints.

M00-M99 (Diseases of the musculoskeletal system and connective tissue) / NH Blacks: 2 Joinpoints

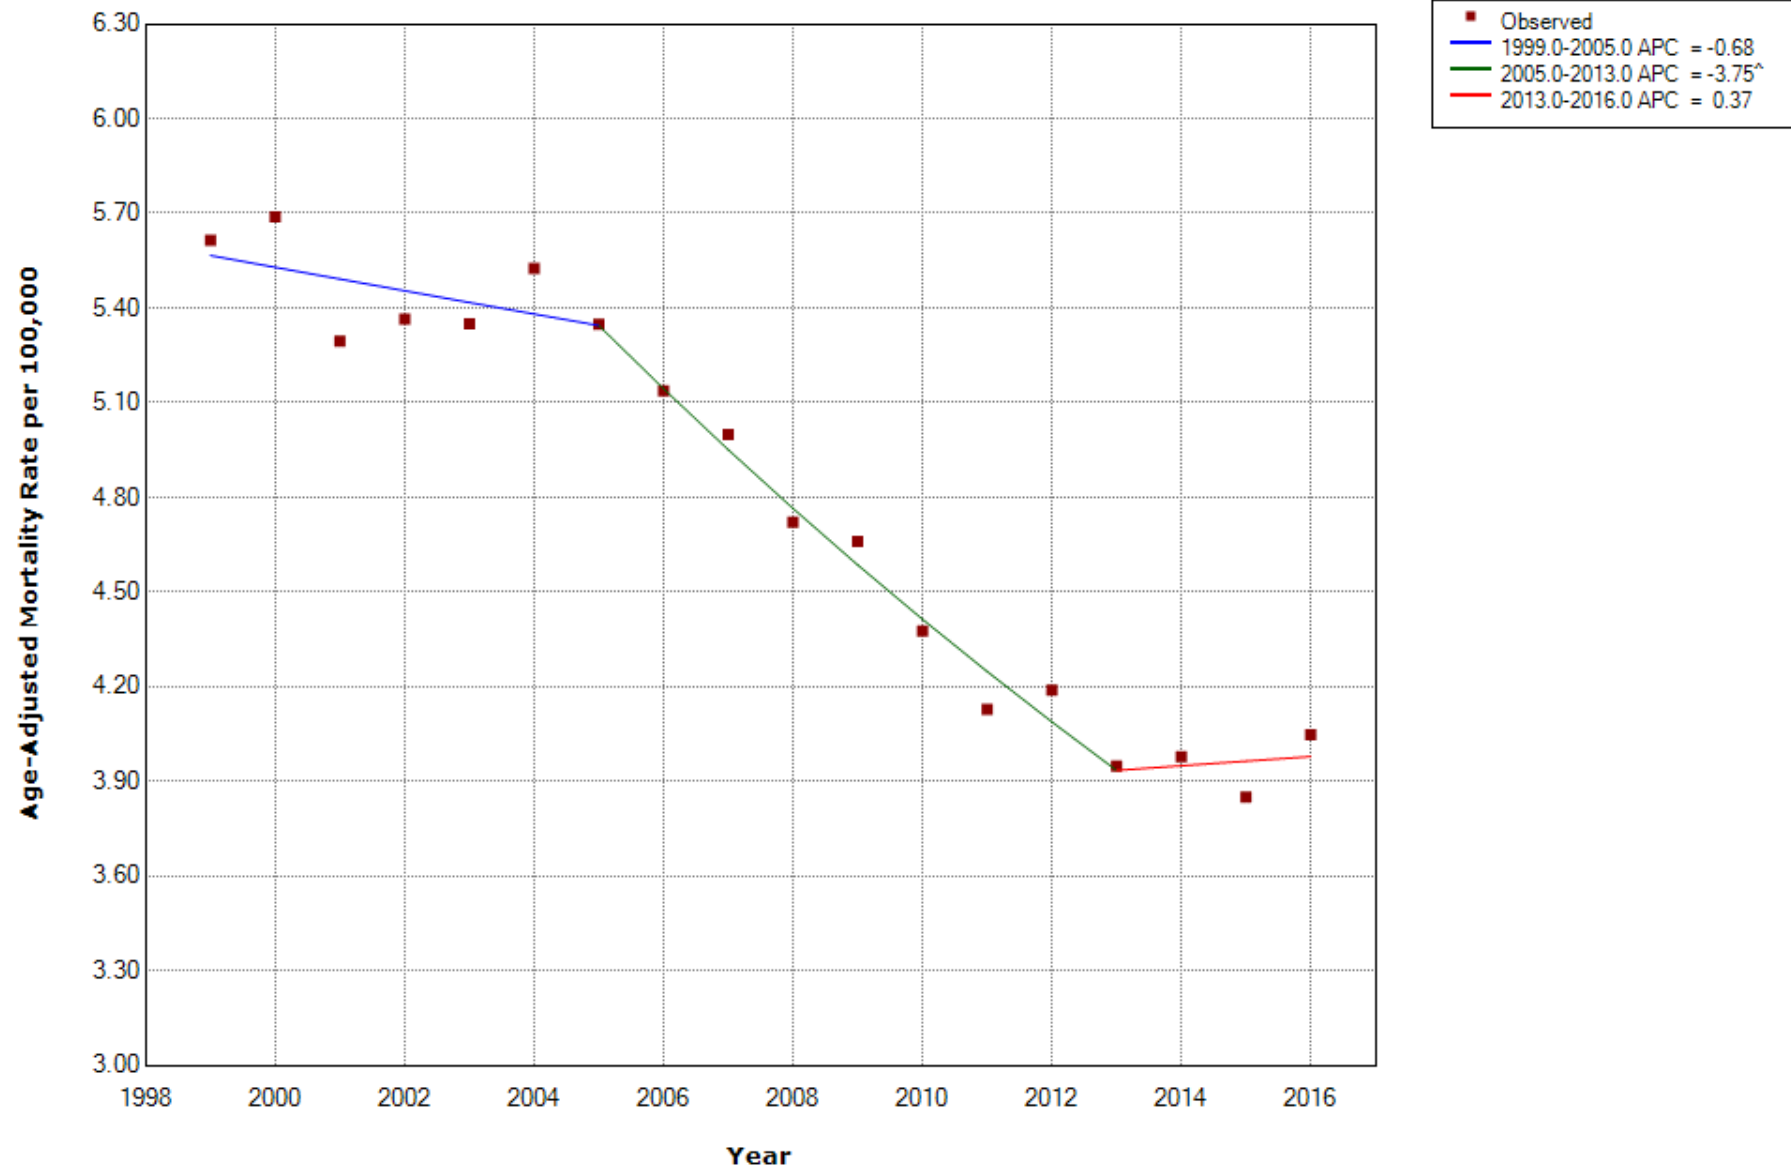

<sup>^</sup> Indicates that the Annual Percent Change (APC) is significantly different from zero at the alpha = 0.05 level.  
Final Selected Model: 2 Joinpoints.

M00-M99 (Diseases of the musculoskeletal system and connective tissue) / NH whites: 1 Joinpoint

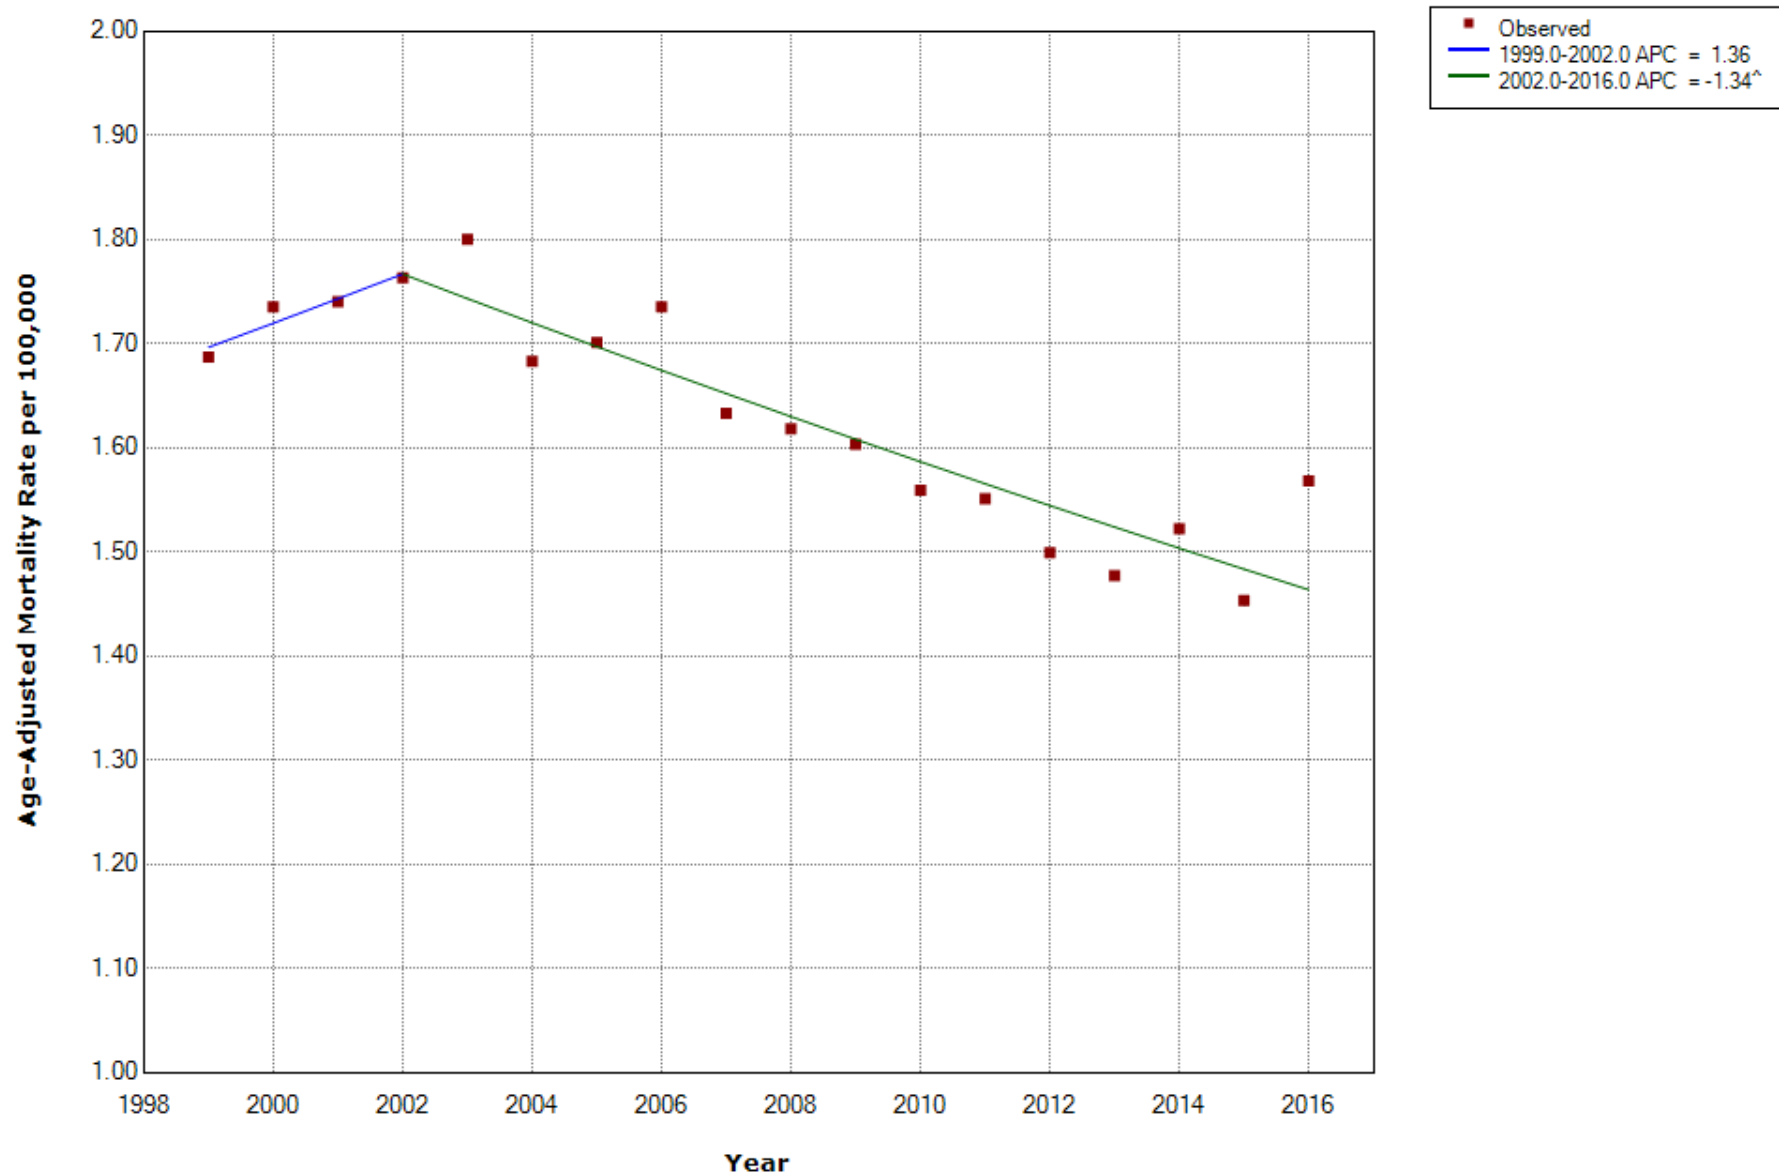

^ Indicates that the Annual Percent Change (APC) is significantly different from zero at the alpha = 0.05 level.  
Final Selected Model: 1 Joinpoint.

M00-M99 (Diseases of the musculoskeletal system and connective tissue) / Hispanics: 0 Joinpoints

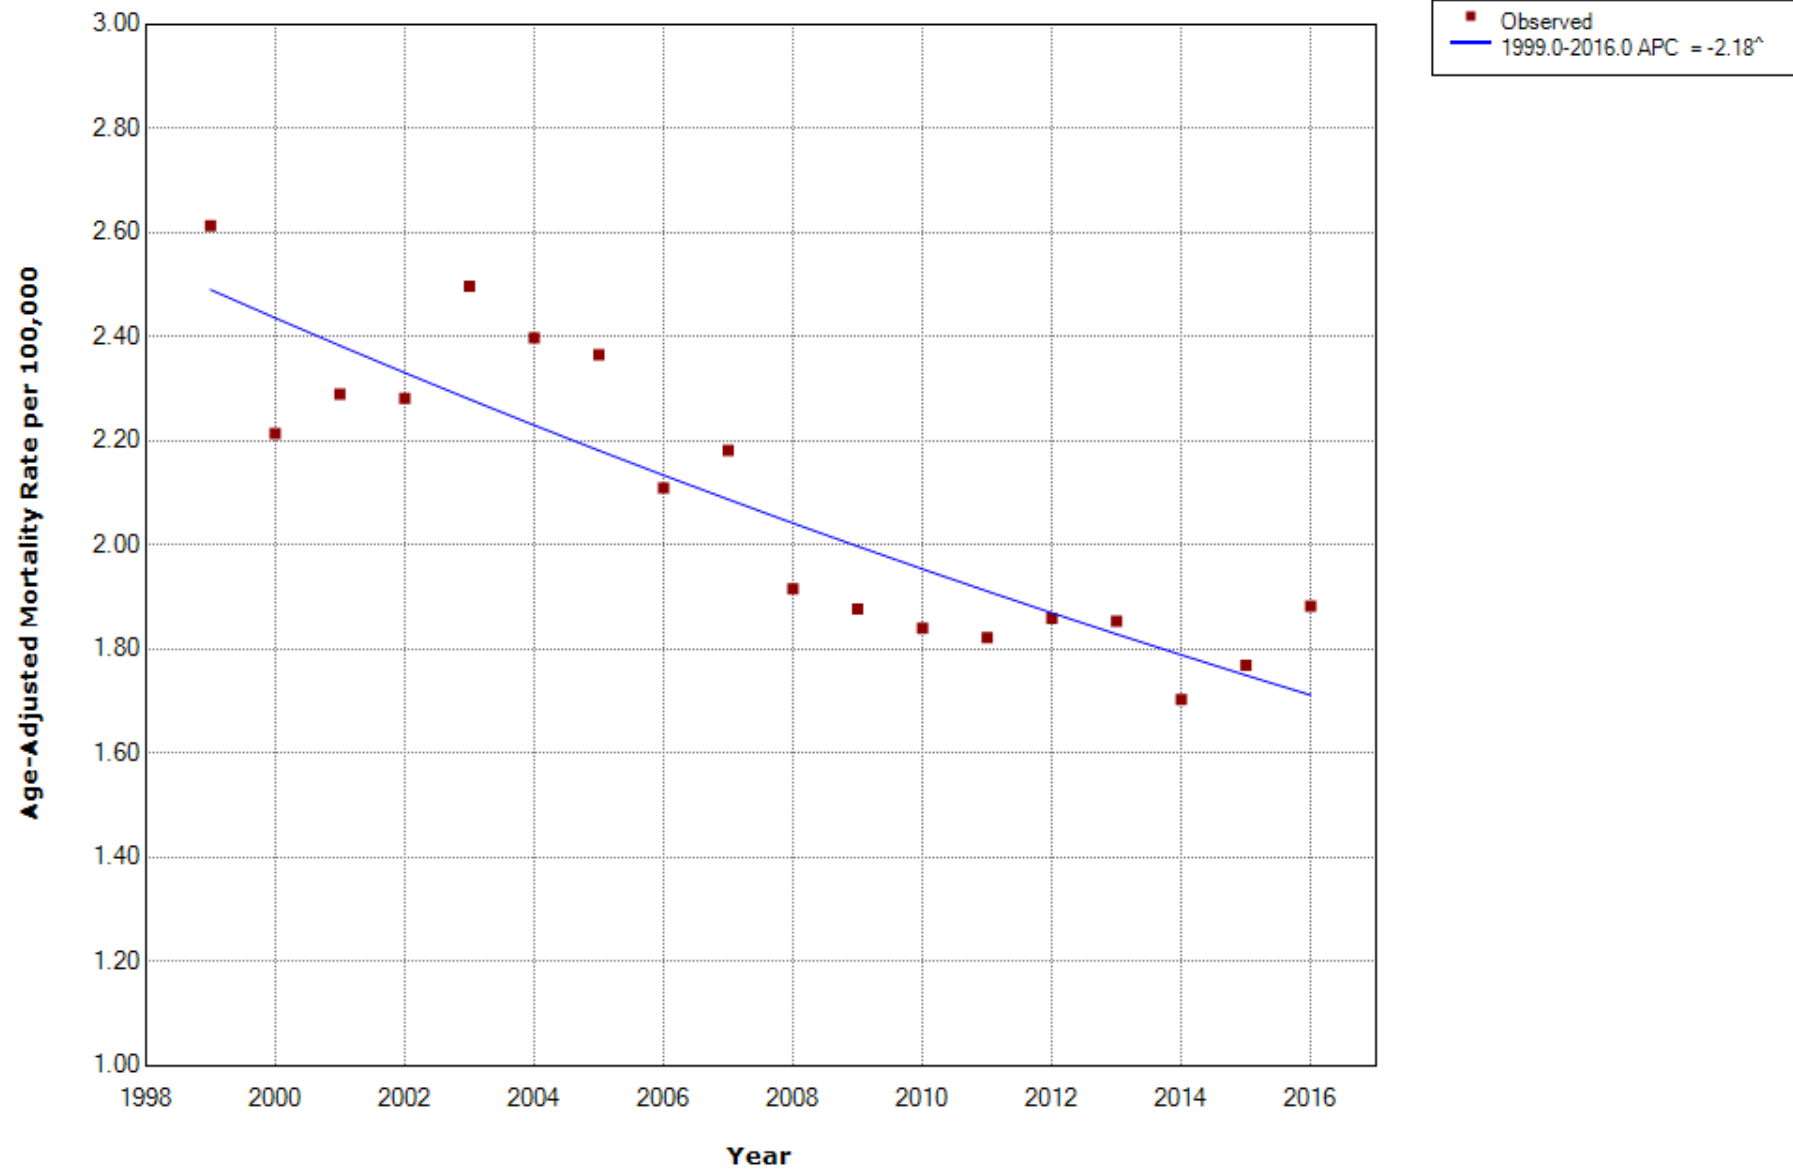

^ Indicates that the Annual Percent Change (APC) is significantly different from zero at the alpha = 0.05 level.  
Final Selected Model: 0 Joinpoints.



Q00-Q99 (Congenital malformations, deformations and chromosomal abnormalities) / NH AIAN: Observed

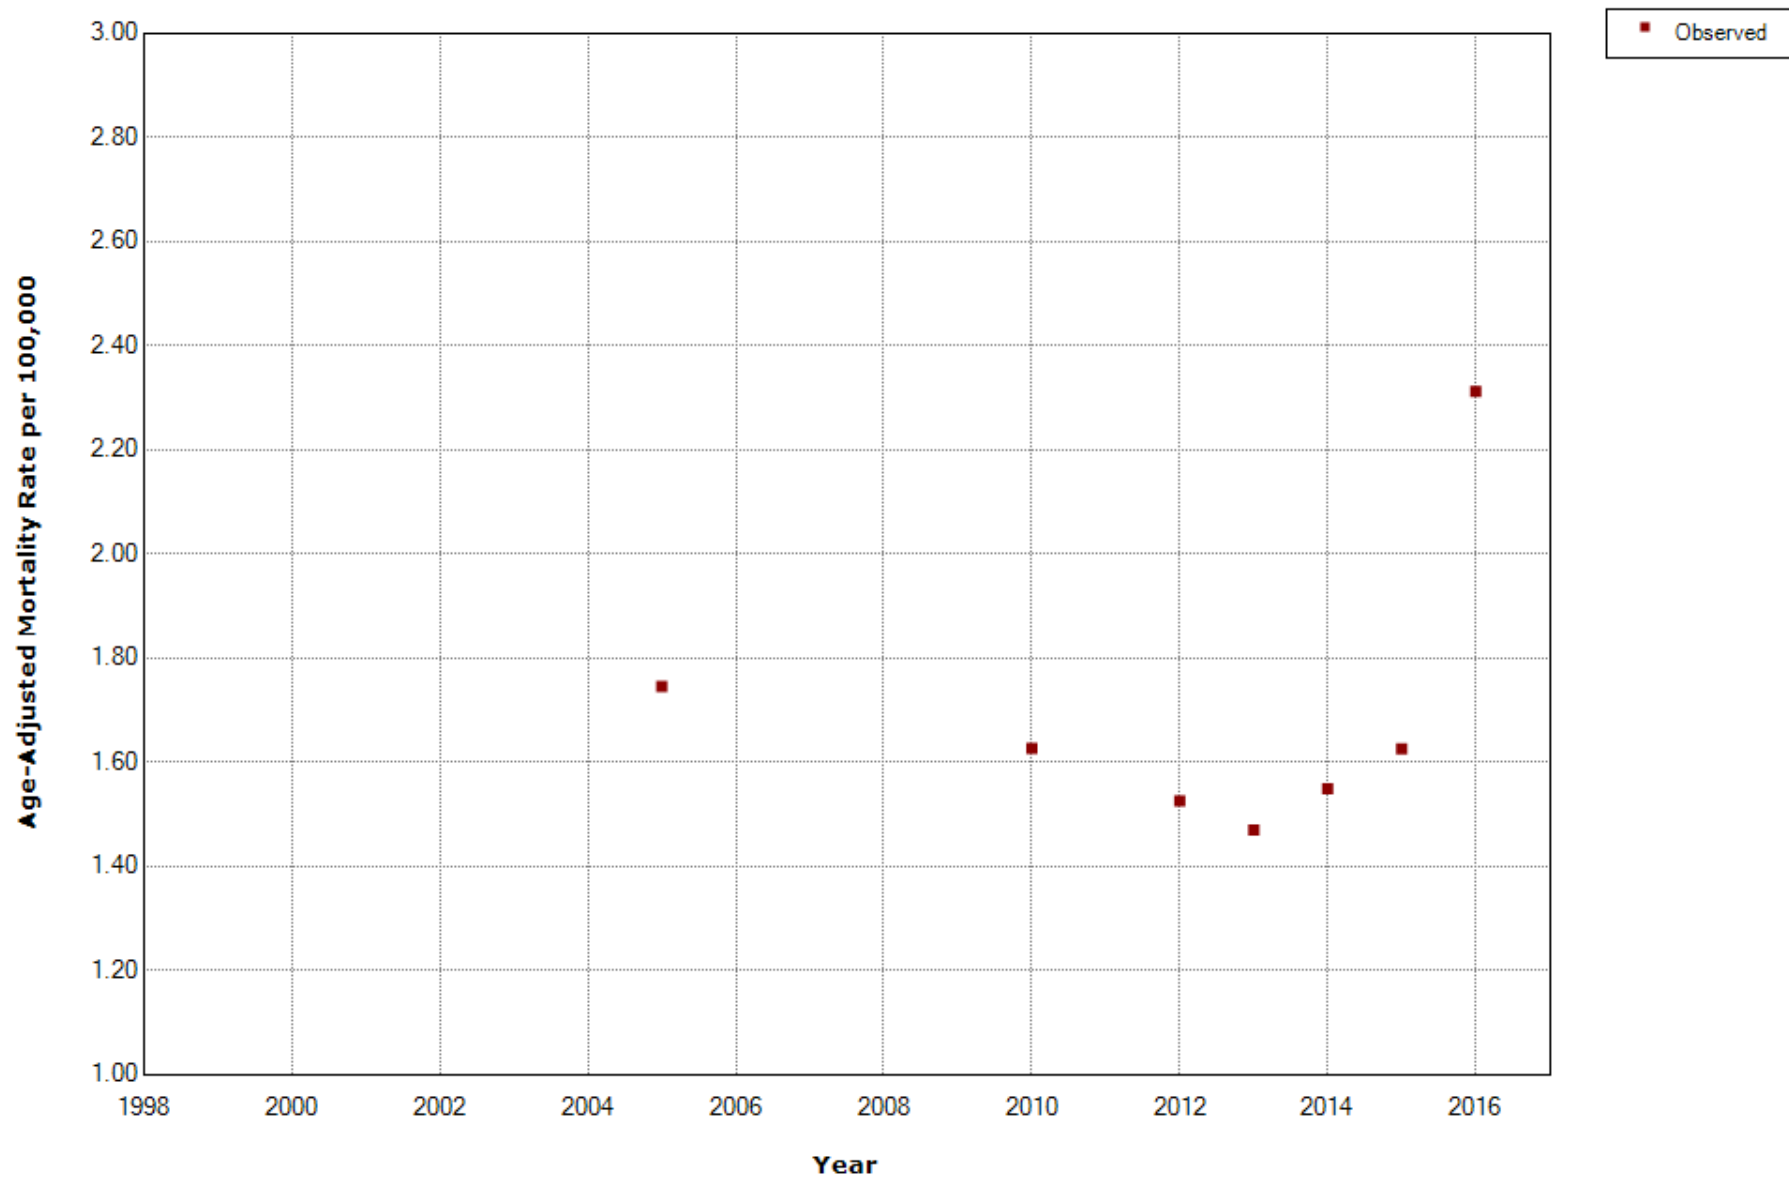

^ Indicates that the Annual Percent Change (APC) is significantly different from zero at the alpha = 0.05 level.

\* Joinpoint cannot process records with missing dependent variable values. Joinpoint will not analyze by-groups that have this error. (Row = 1260, Col = 1)

Q00-Q99 (Congenital malformations, deformations and chromosomal abnormalities) / NH API: 0 Joinpoints

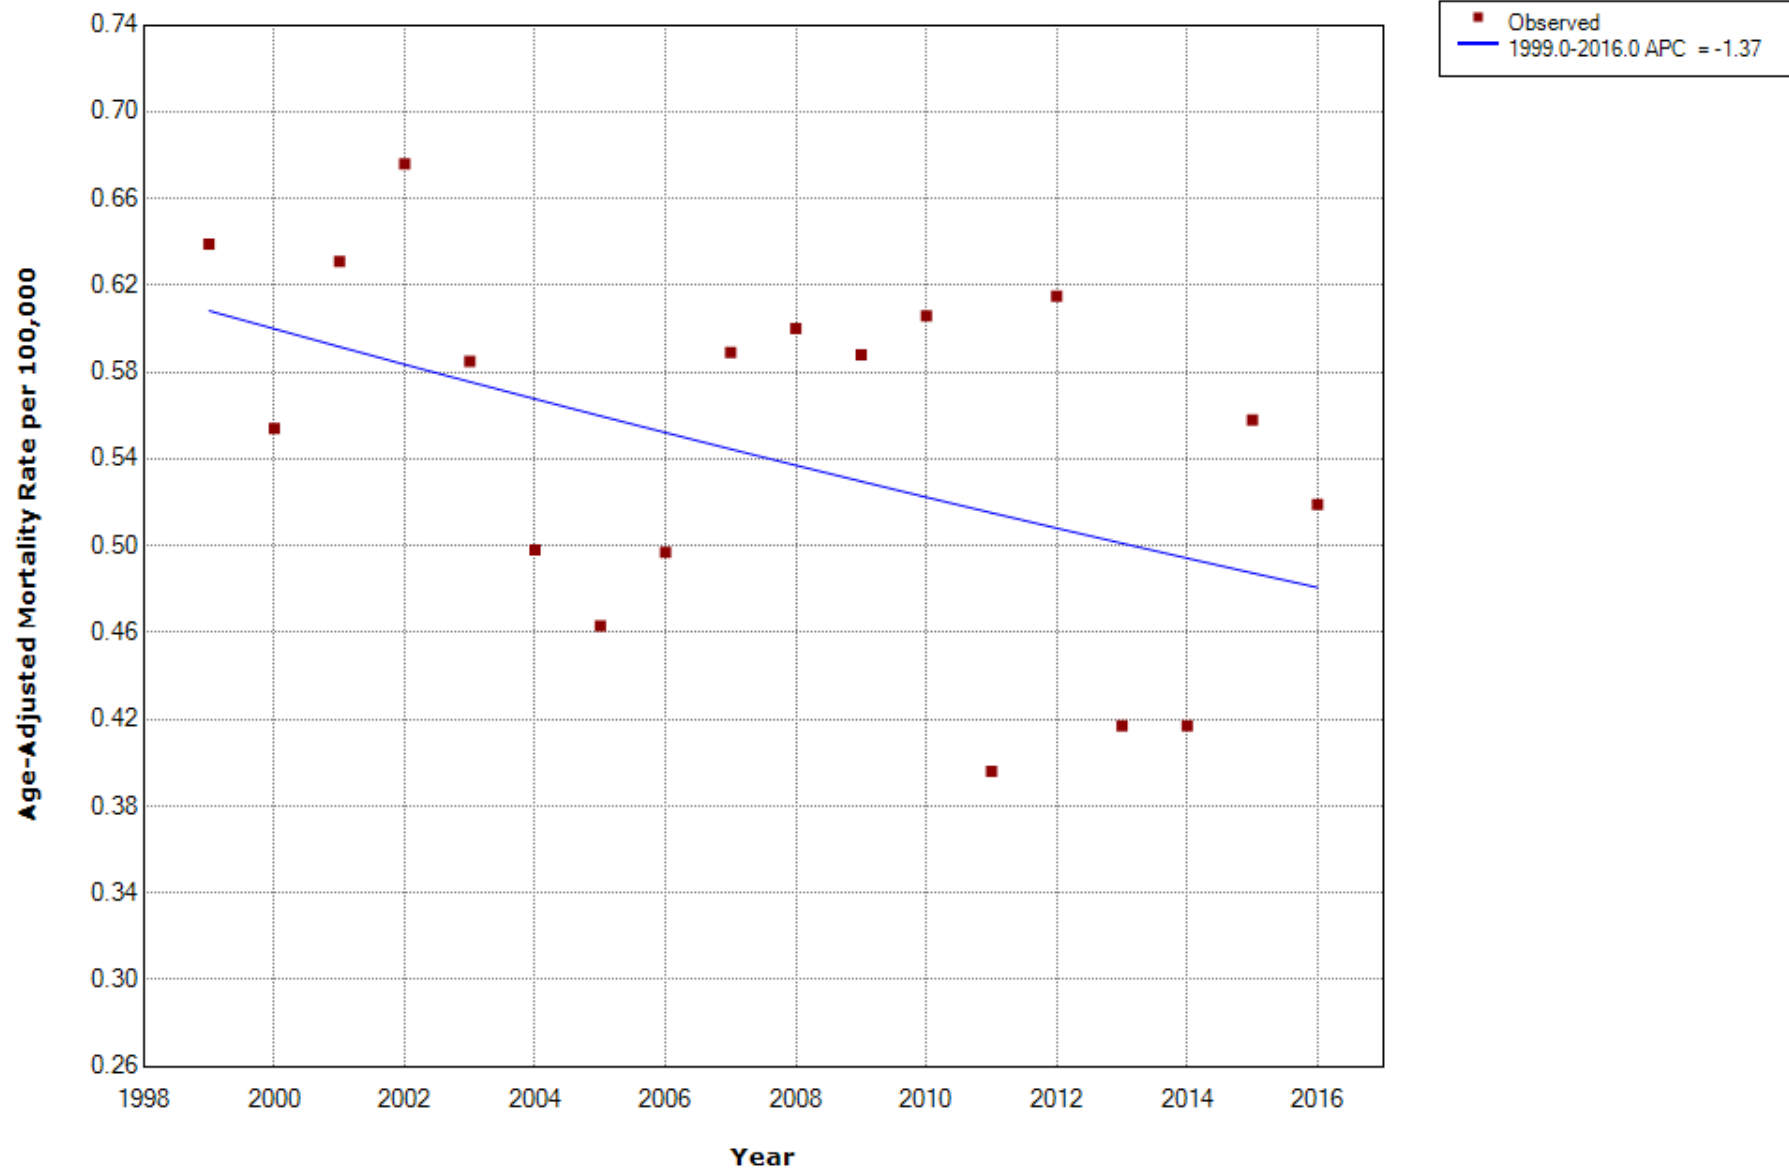

^ Indicates that the Annual Percent Change (APC) is significantly different from zero at the alpha = 0.05 level.  
Final Selected Model: 0 Joinpoints.

Q00-Q99 (Congenital malformations, deformations and chromosomal abnormalities) / NH Blacks: 0 Joinpoints

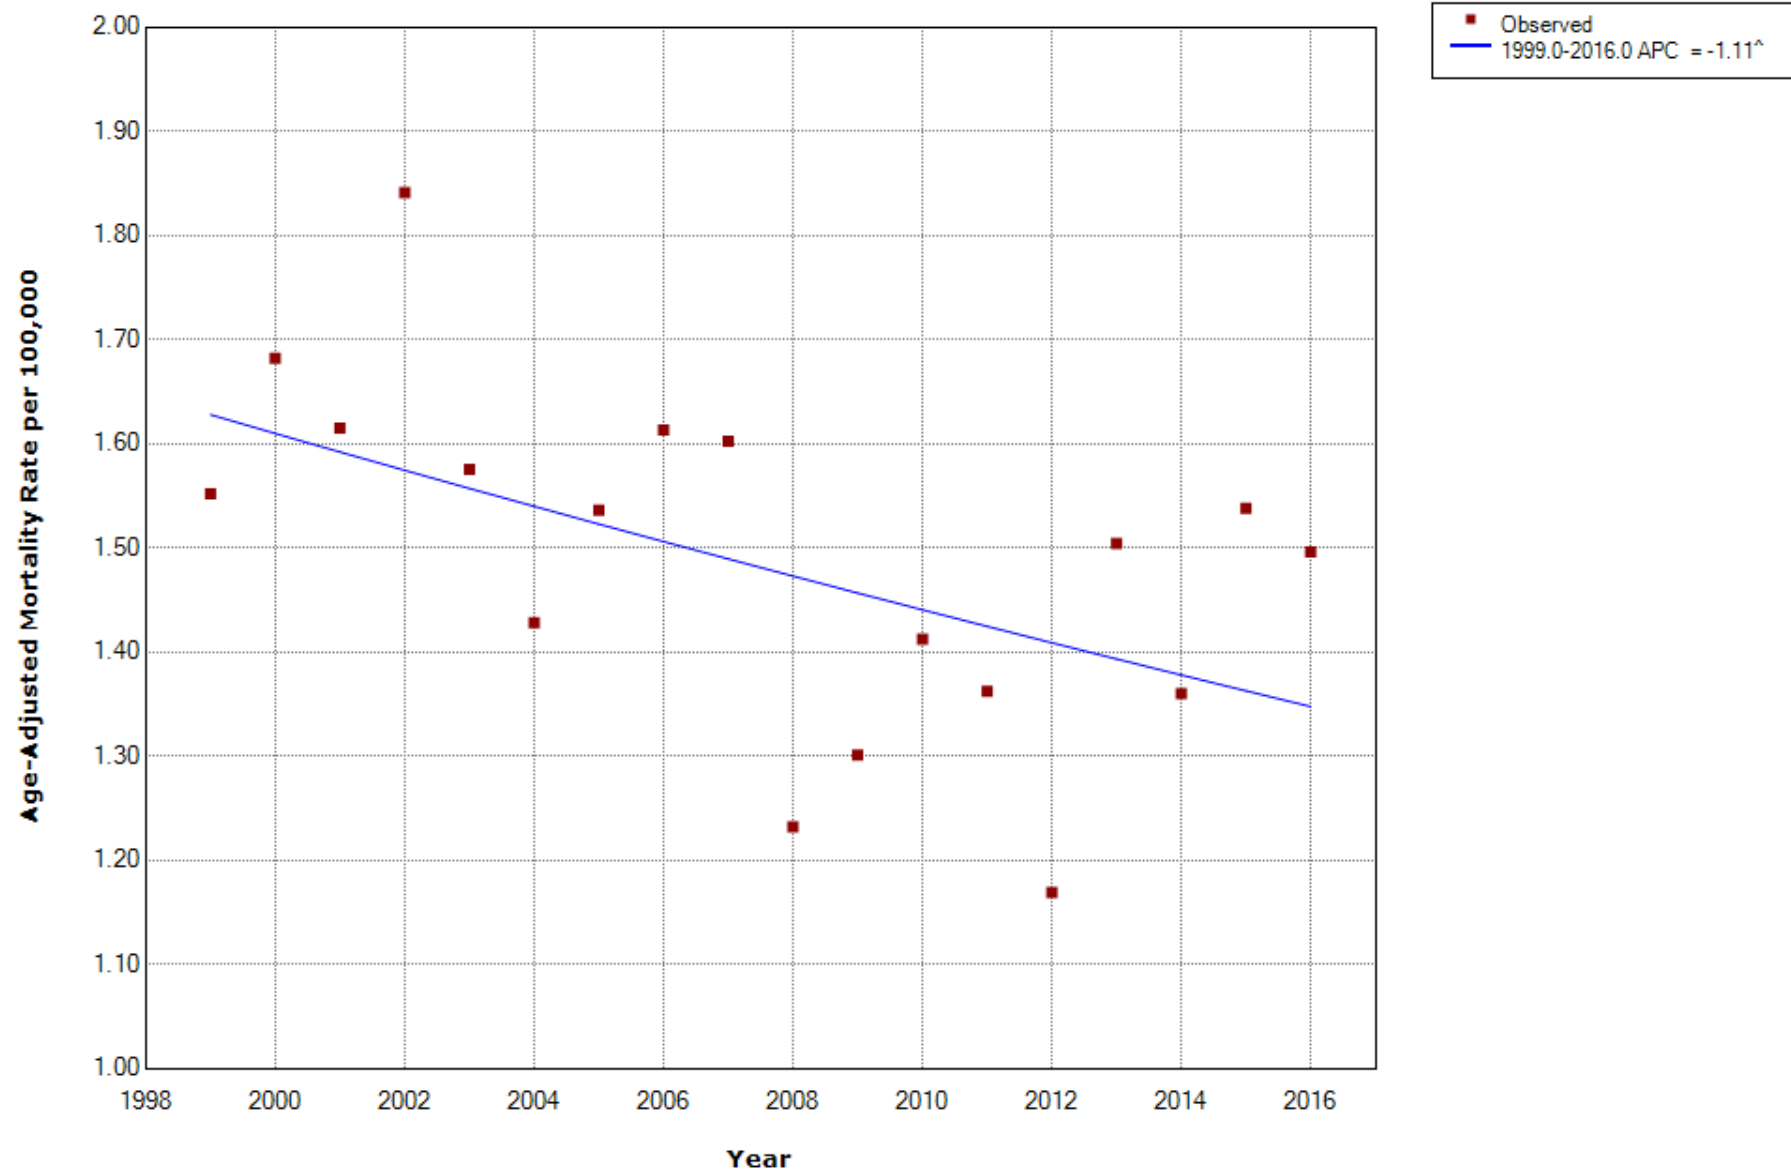

^ Indicates that the Annual Percent Change (APC) is significantly different from zero at the alpha = 0.05 level.  
Final Selected Model: 0 Joinpoints.

Q00-Q99 (Congenital malformations, deformations and chromosomal abnormalities) / NH whites: 1 Joinpoint

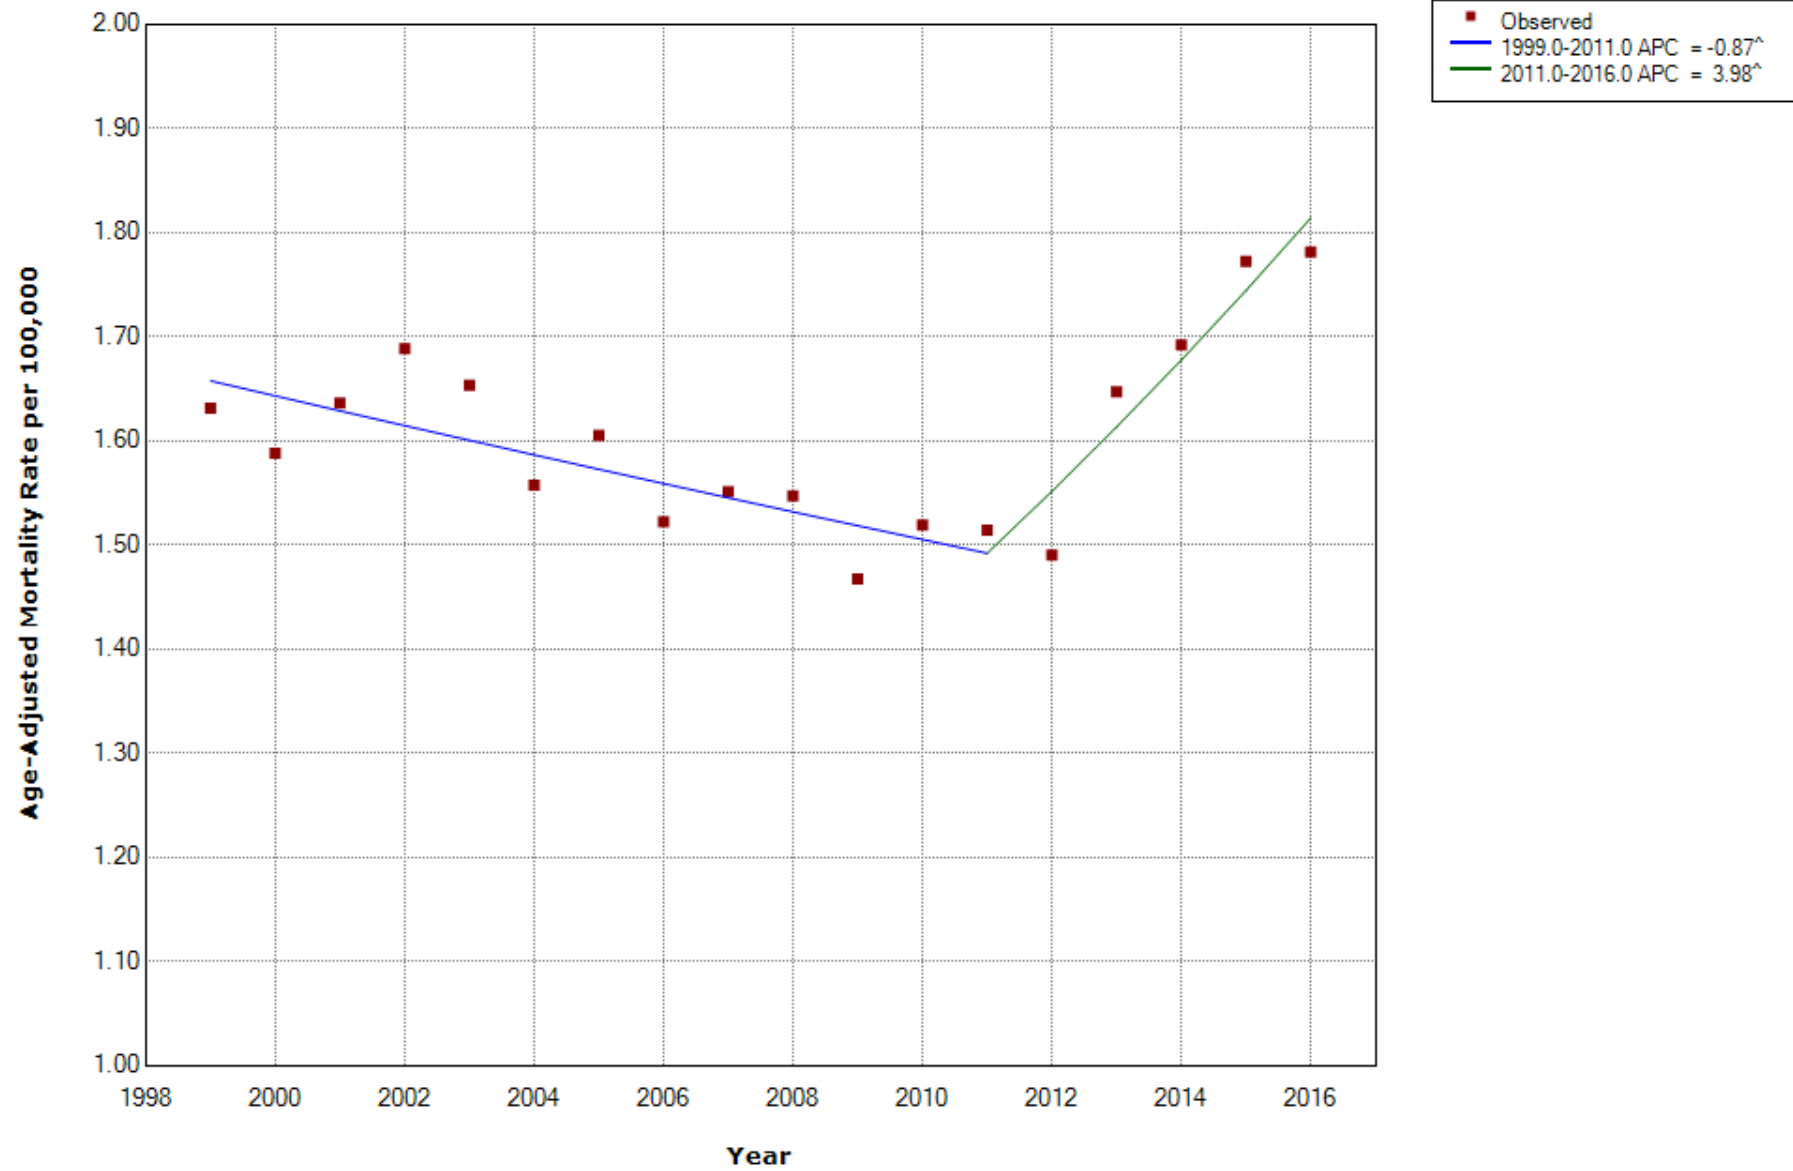

^ Indicates that the Annual Percent Change (APC) is significantly different from zero at the alpha = 0.05 level.  
Final Selected Model: 1 Joinpoint.

Q00-Q99 (Congenital malformations, deformations and chromosomal abnormalities) / Hispanics: 0 Joinpoints

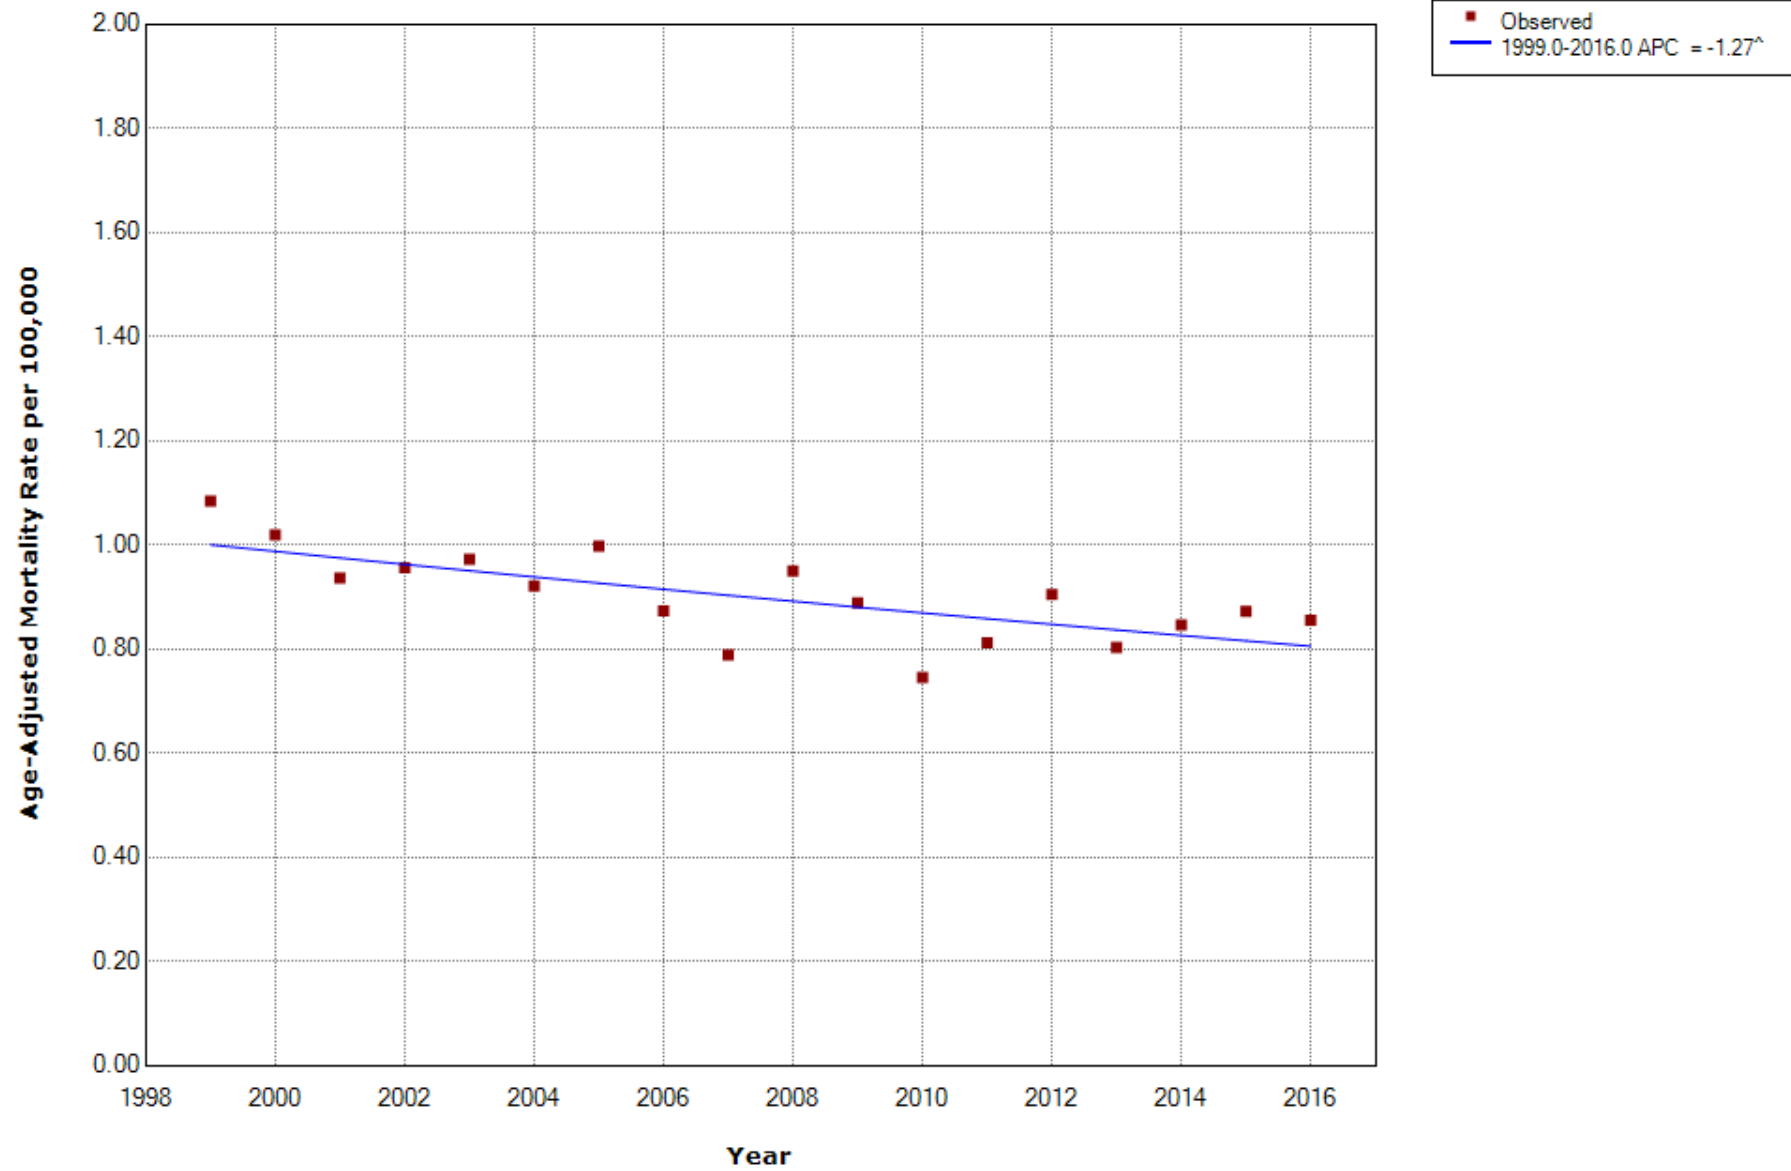

^ Indicates that the Annual Percent Change (APC) is significantly different from zero at the alpha = 0.05 level.  
Final Selected Model: 0 Joinpoints.

### D50-D89 (Diseases of the blood and immune mechanism) / NH AIAN: Observed

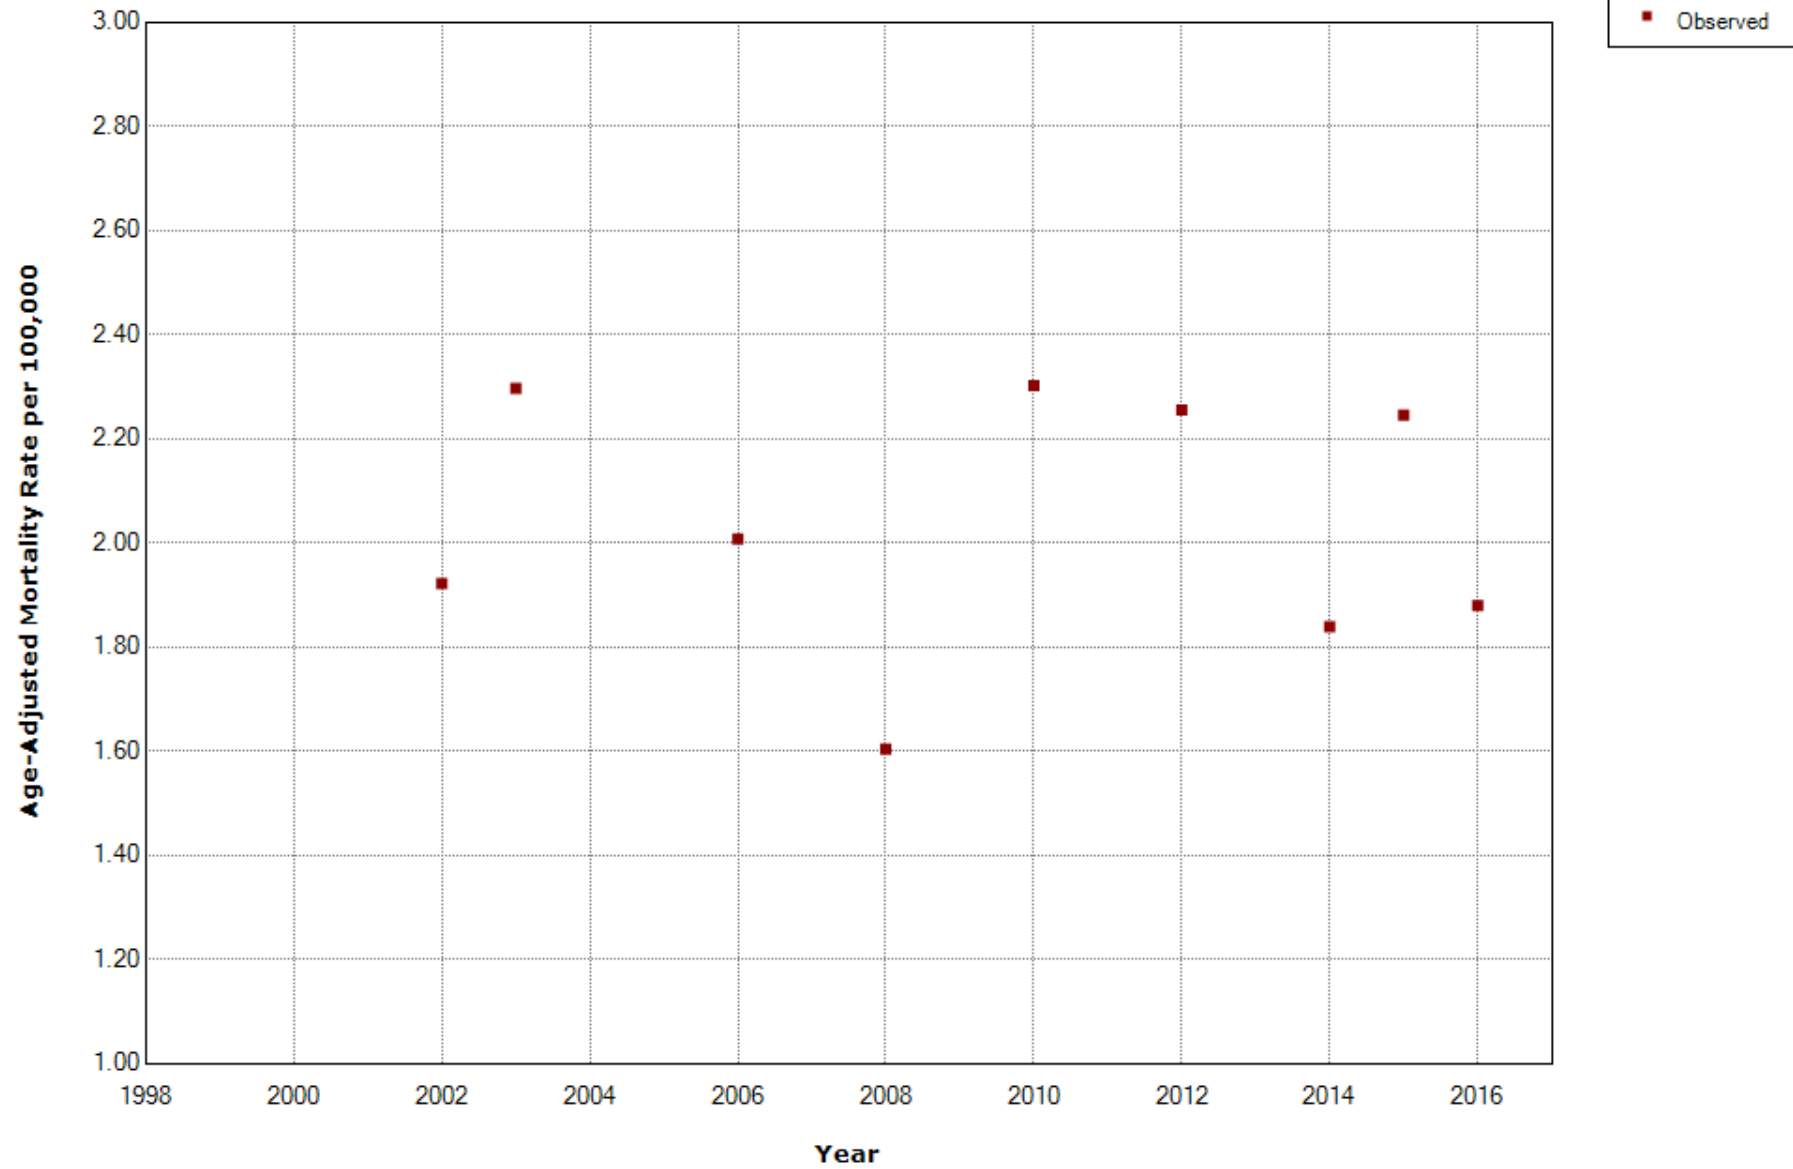

^ Indicates that the Annual Percent Change (APC) is significantly different from zero at the alpha = 0.05 level.

\* Joinpoint cannot process records with missing dependent variable values. Joinpoint will not analyze by-groups that have this error. (Row = 1350, Col = 1)

D50-D89 (Diseases of the blood and immune mechanism) / NH API: 0 Joinpoints

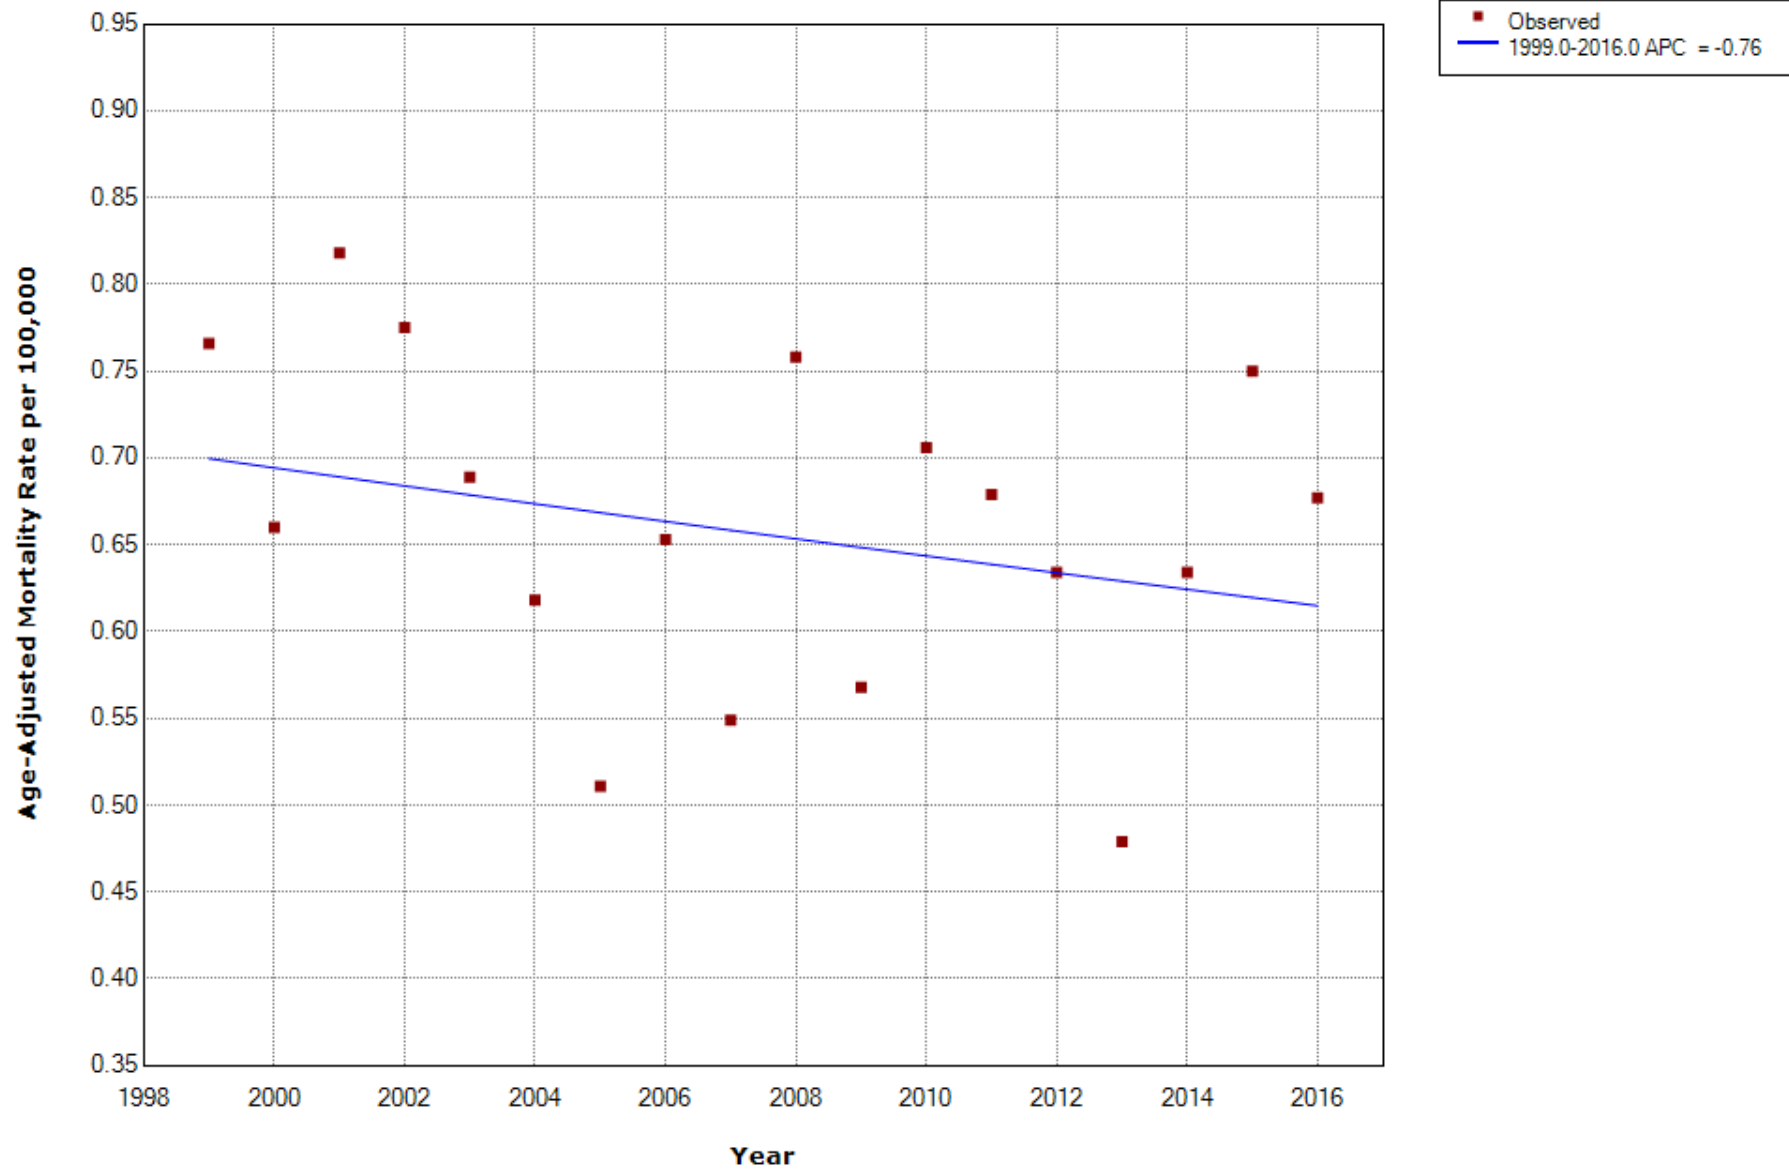

^ Indicates that the Annual Percent Change (APC) is significantly different from zero at the alpha = 0.05 level.  
Final Selected Model: 0 Joinpoints.

### D50-D89 (Diseases of the blood and immune mechanism) / NH Blacks: 2 Joinpoints

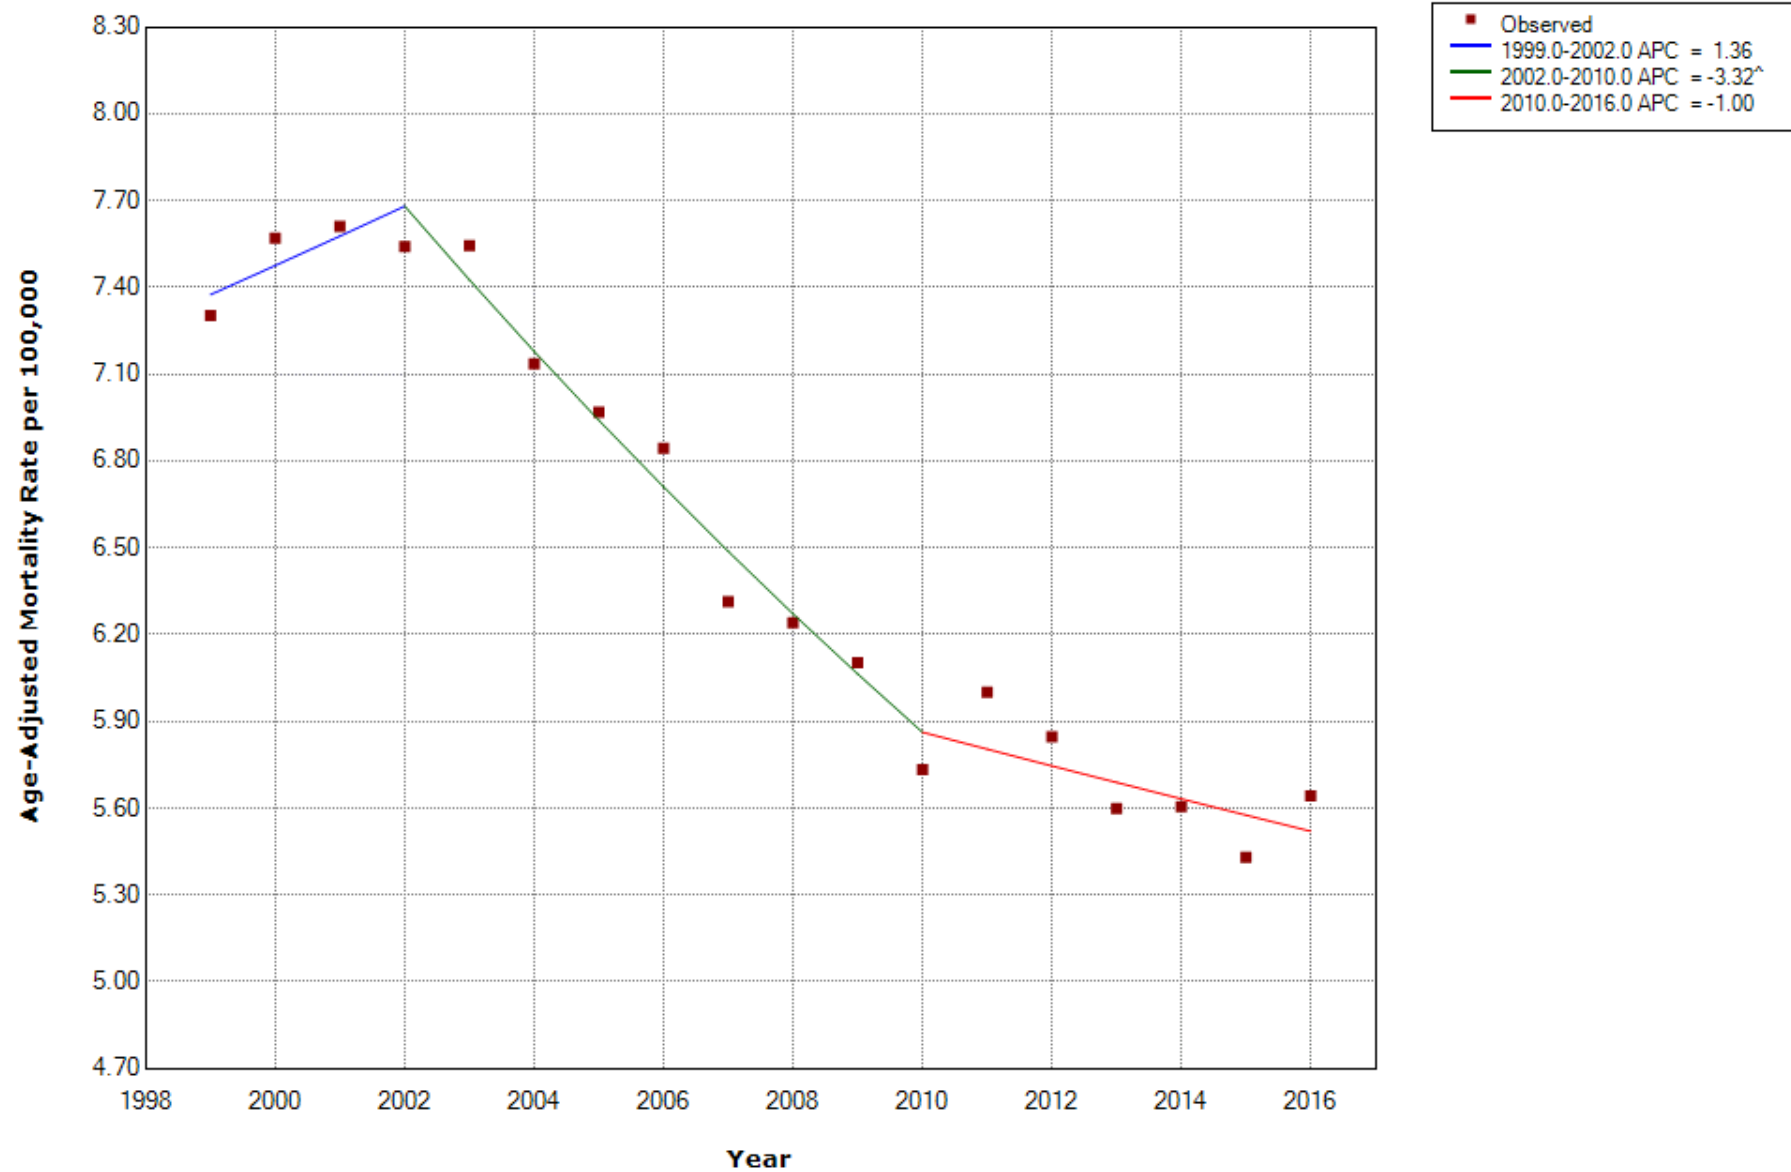

<sup>^</sup> Indicates that the Annual Percent Change (APC) is significantly different from zero at the alpha = 0.05 level.  
Final Selected Model: 2 Joinpoints.



D50-D89 (Diseases of the blood and immune mechanism) / NH whites: 0 Joinpoints

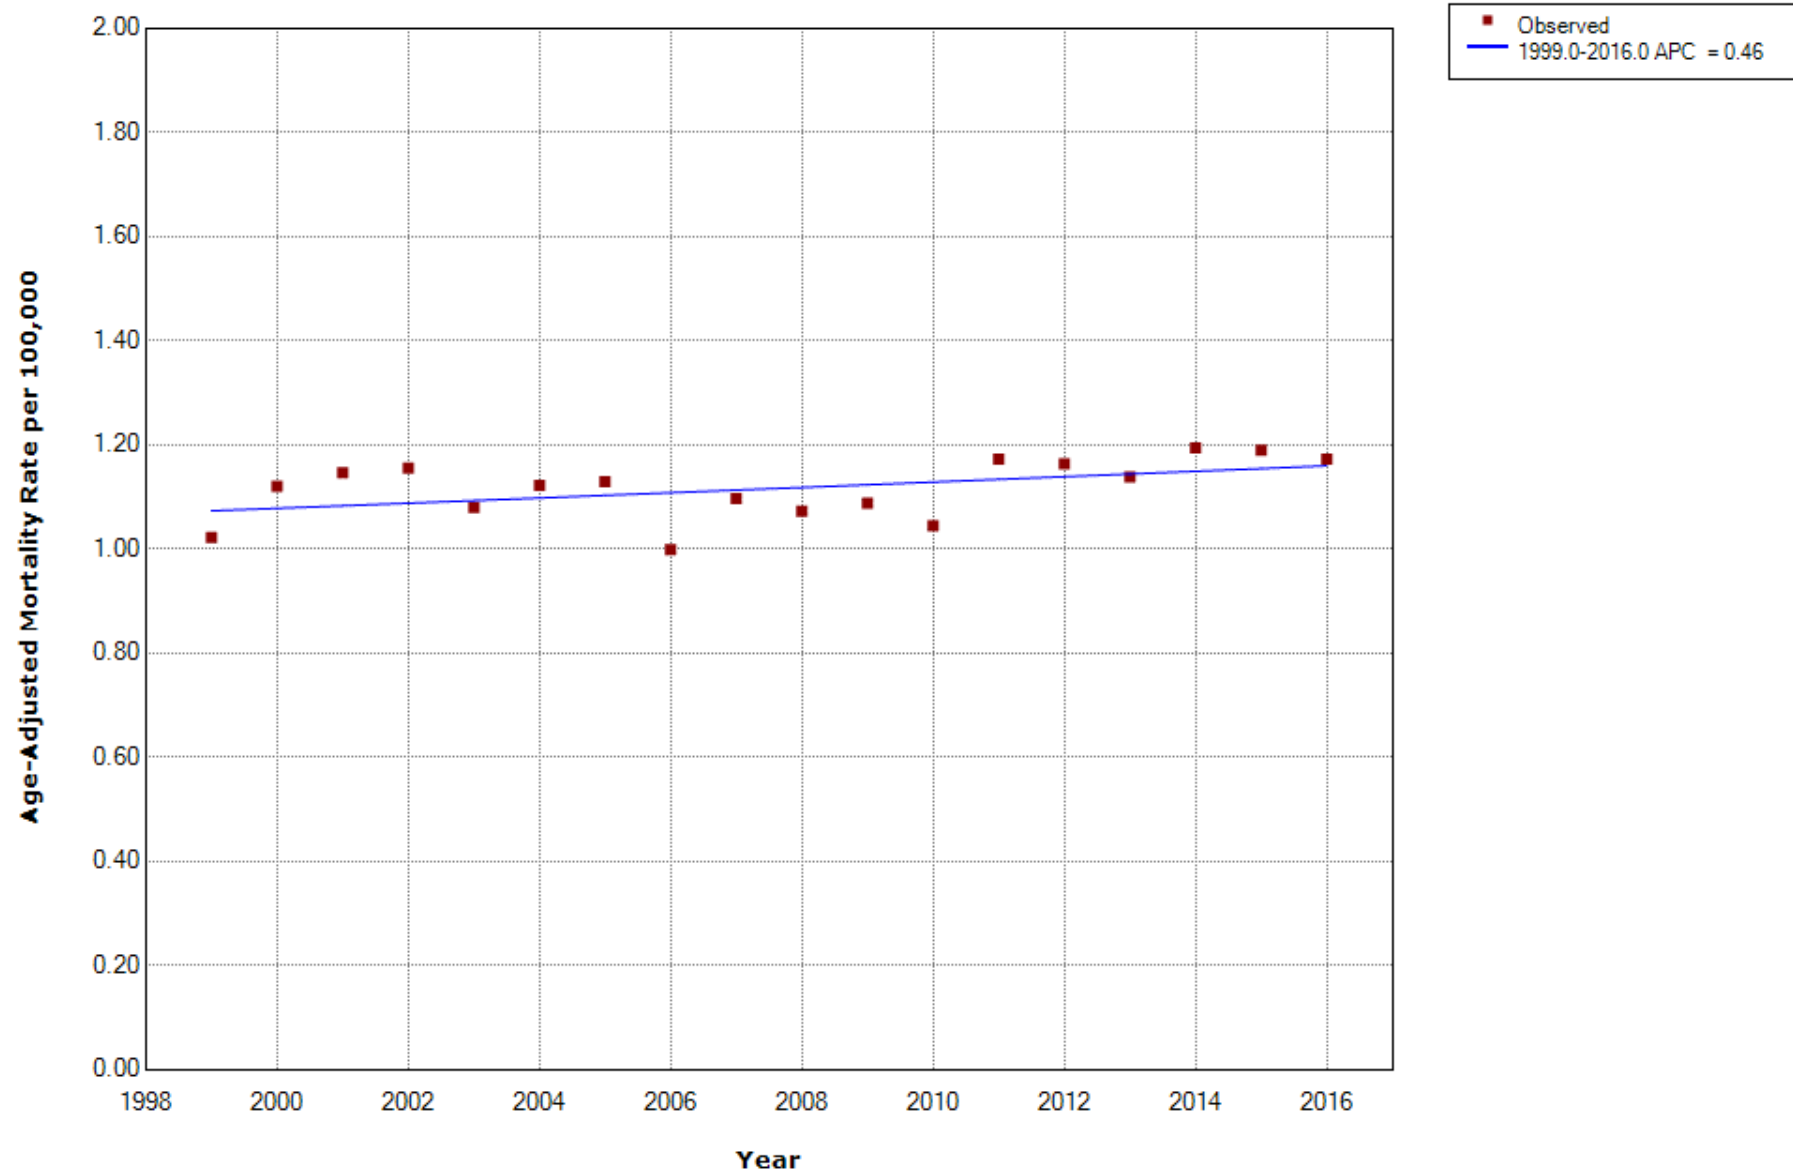

^ Indicates that the Annual Percent Change (APC) is significantly different from zero at the alpha = 0.05 level.  
Final Selected Model: 0 Joinpoints.

D50-D89 (Diseases of the blood and immune mechanism) / Hispanics: 1 Joinpoint

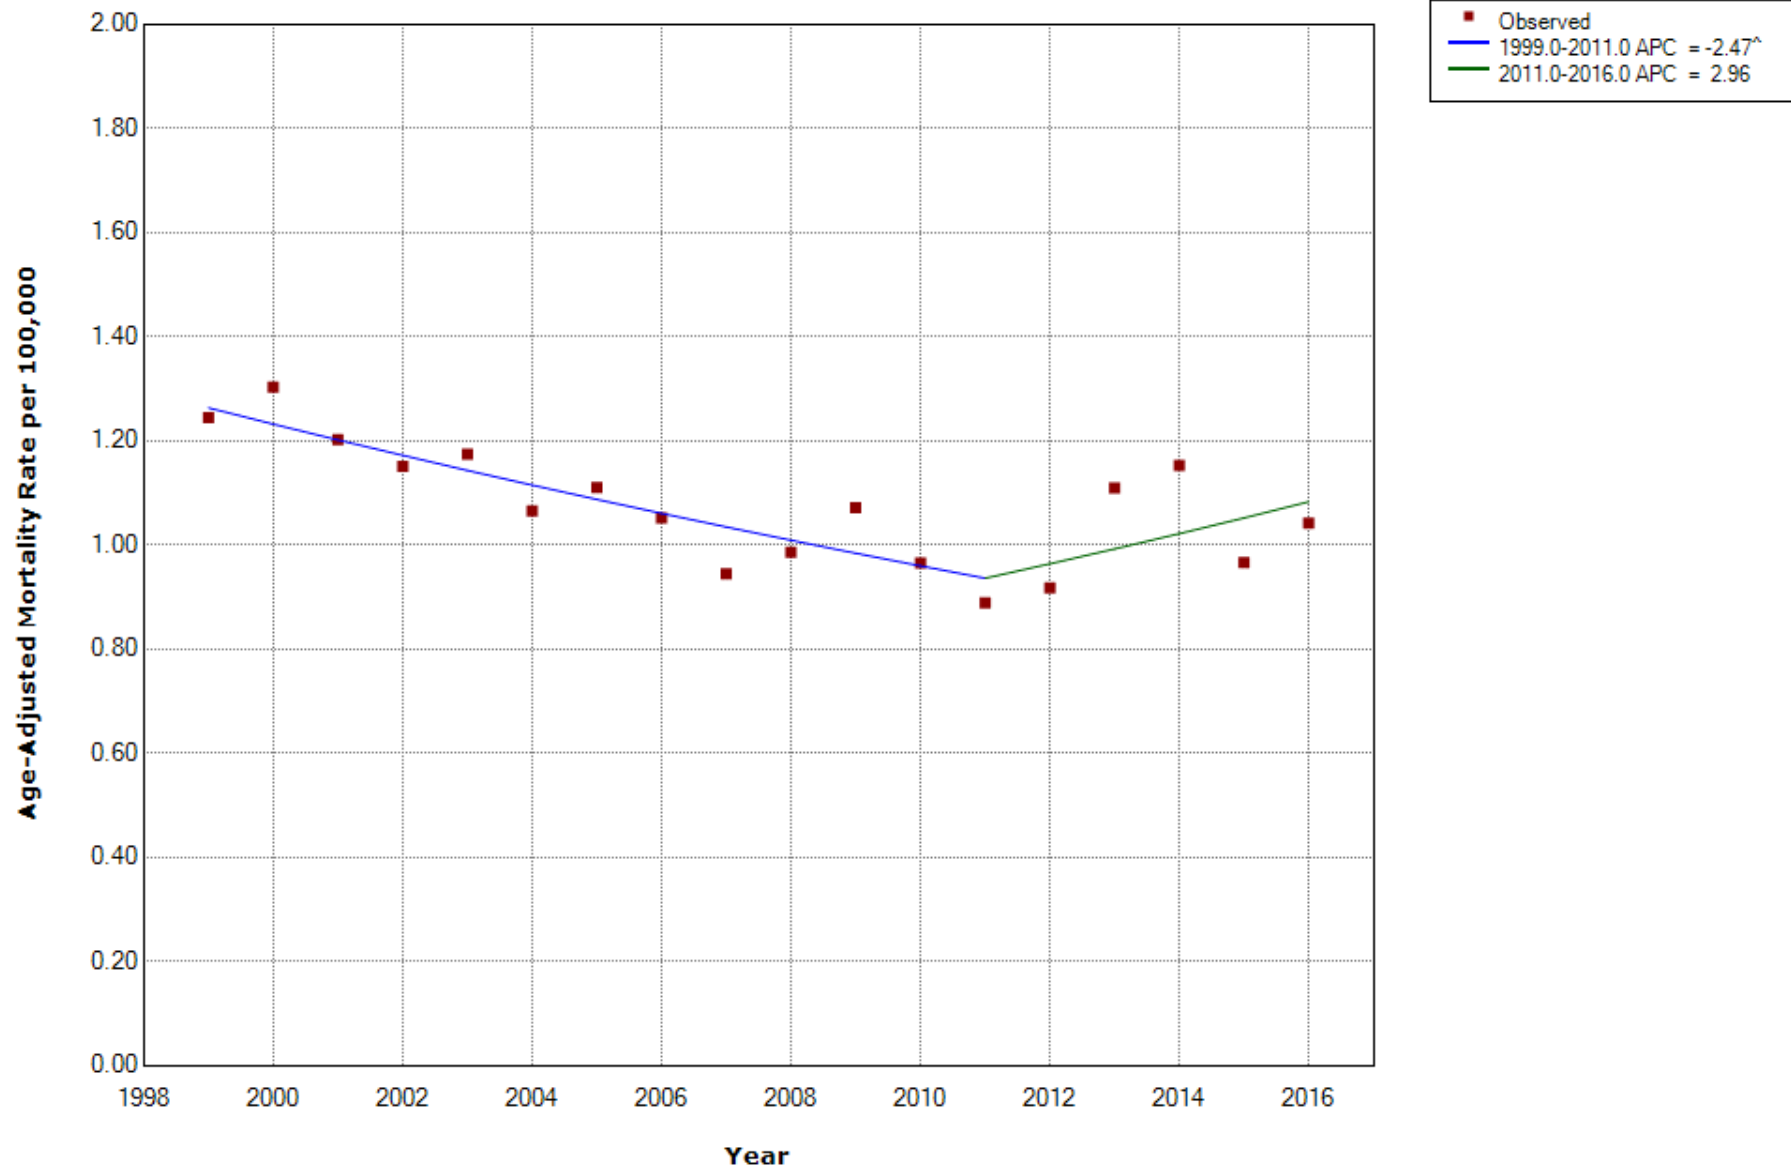

^ Indicates that the Annual Percent Change (APC) is significantly different from zero at the alpha = 0.05 level.  
Final Selected Model: 1 Joinpoint.

### L00-L98 (Diseases of the skin and subcutaneous tissue) / NH AIAN: Observed

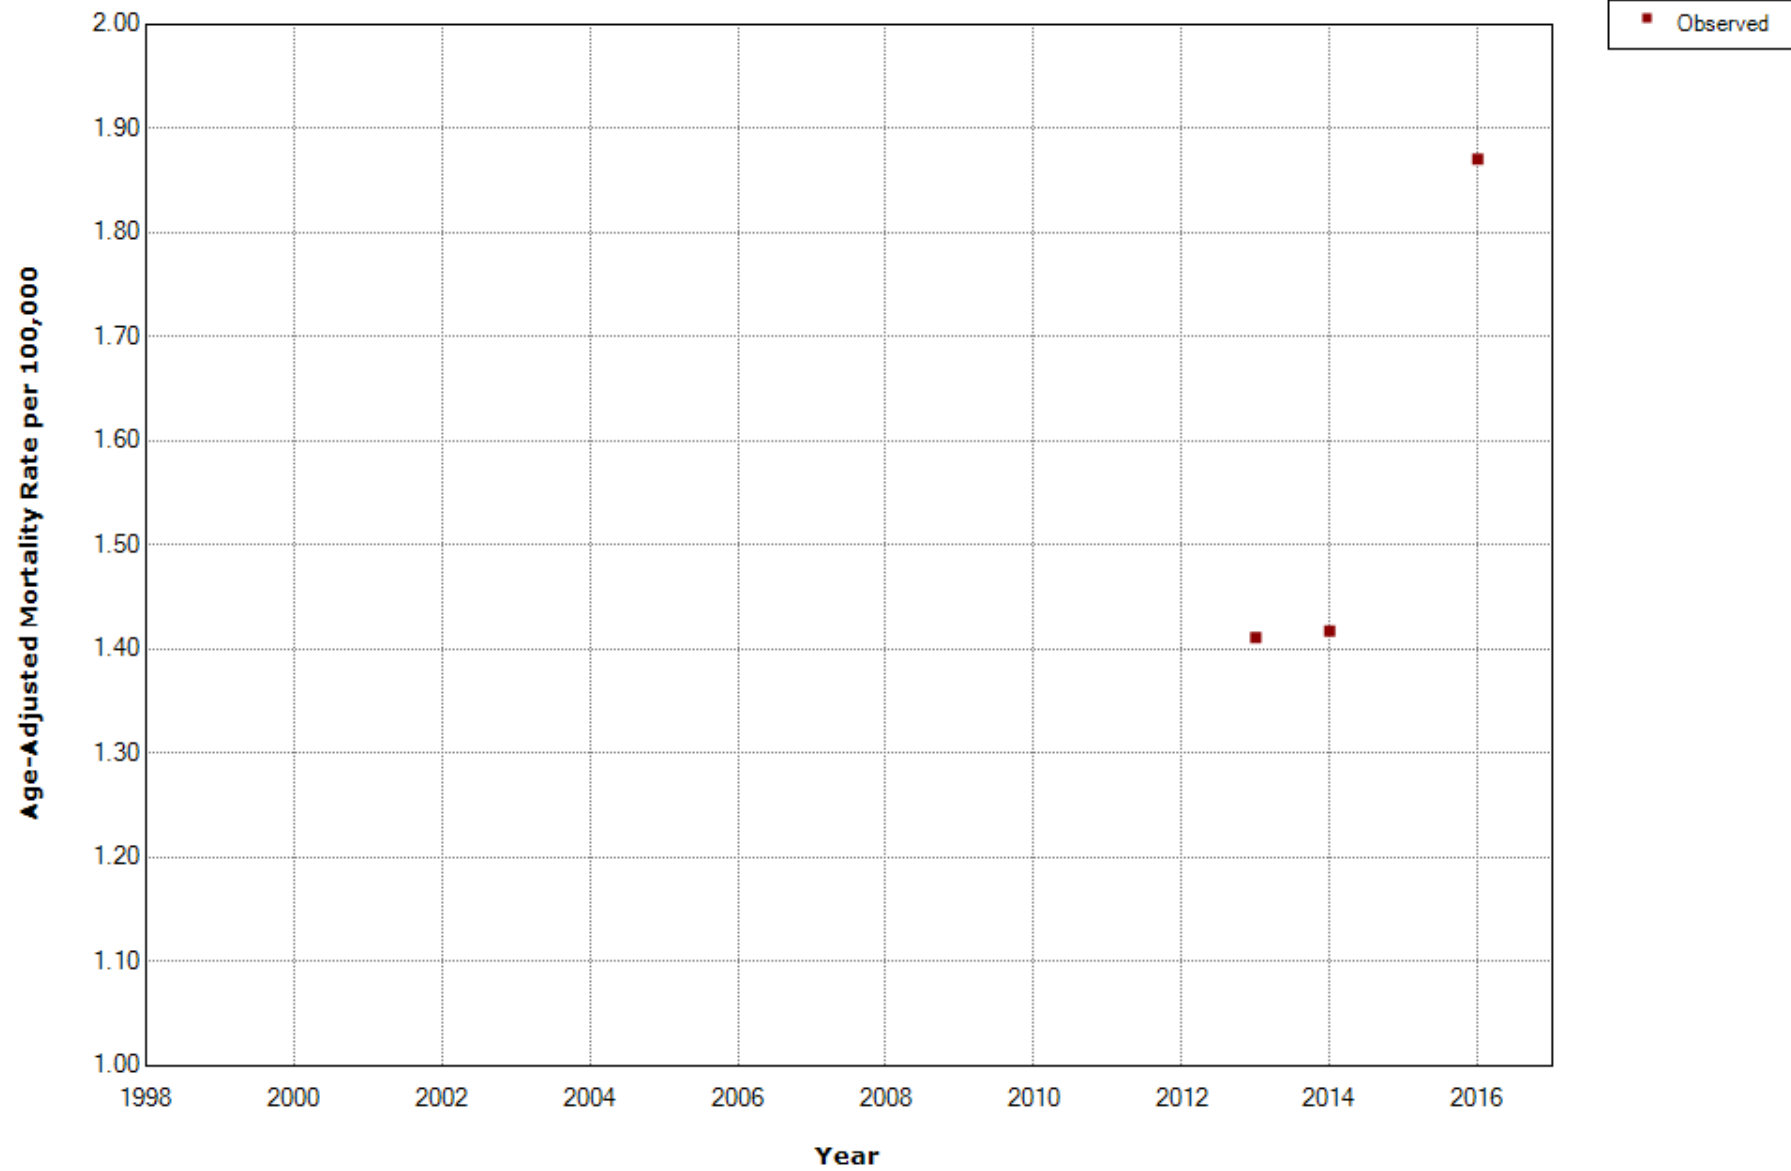

^ Indicates that the Annual Percent Change (APC) is significantly different from zero at the alpha = 0.05 level.

\* Joinpoint cannot process records with missing dependent variable values. Joinpoint will not analyze by-groups that have this error. (Row = 1440, Col = 1)

### L00-L98 (Diseases of the skin and subcutaneous tissue) / NH API: Observed

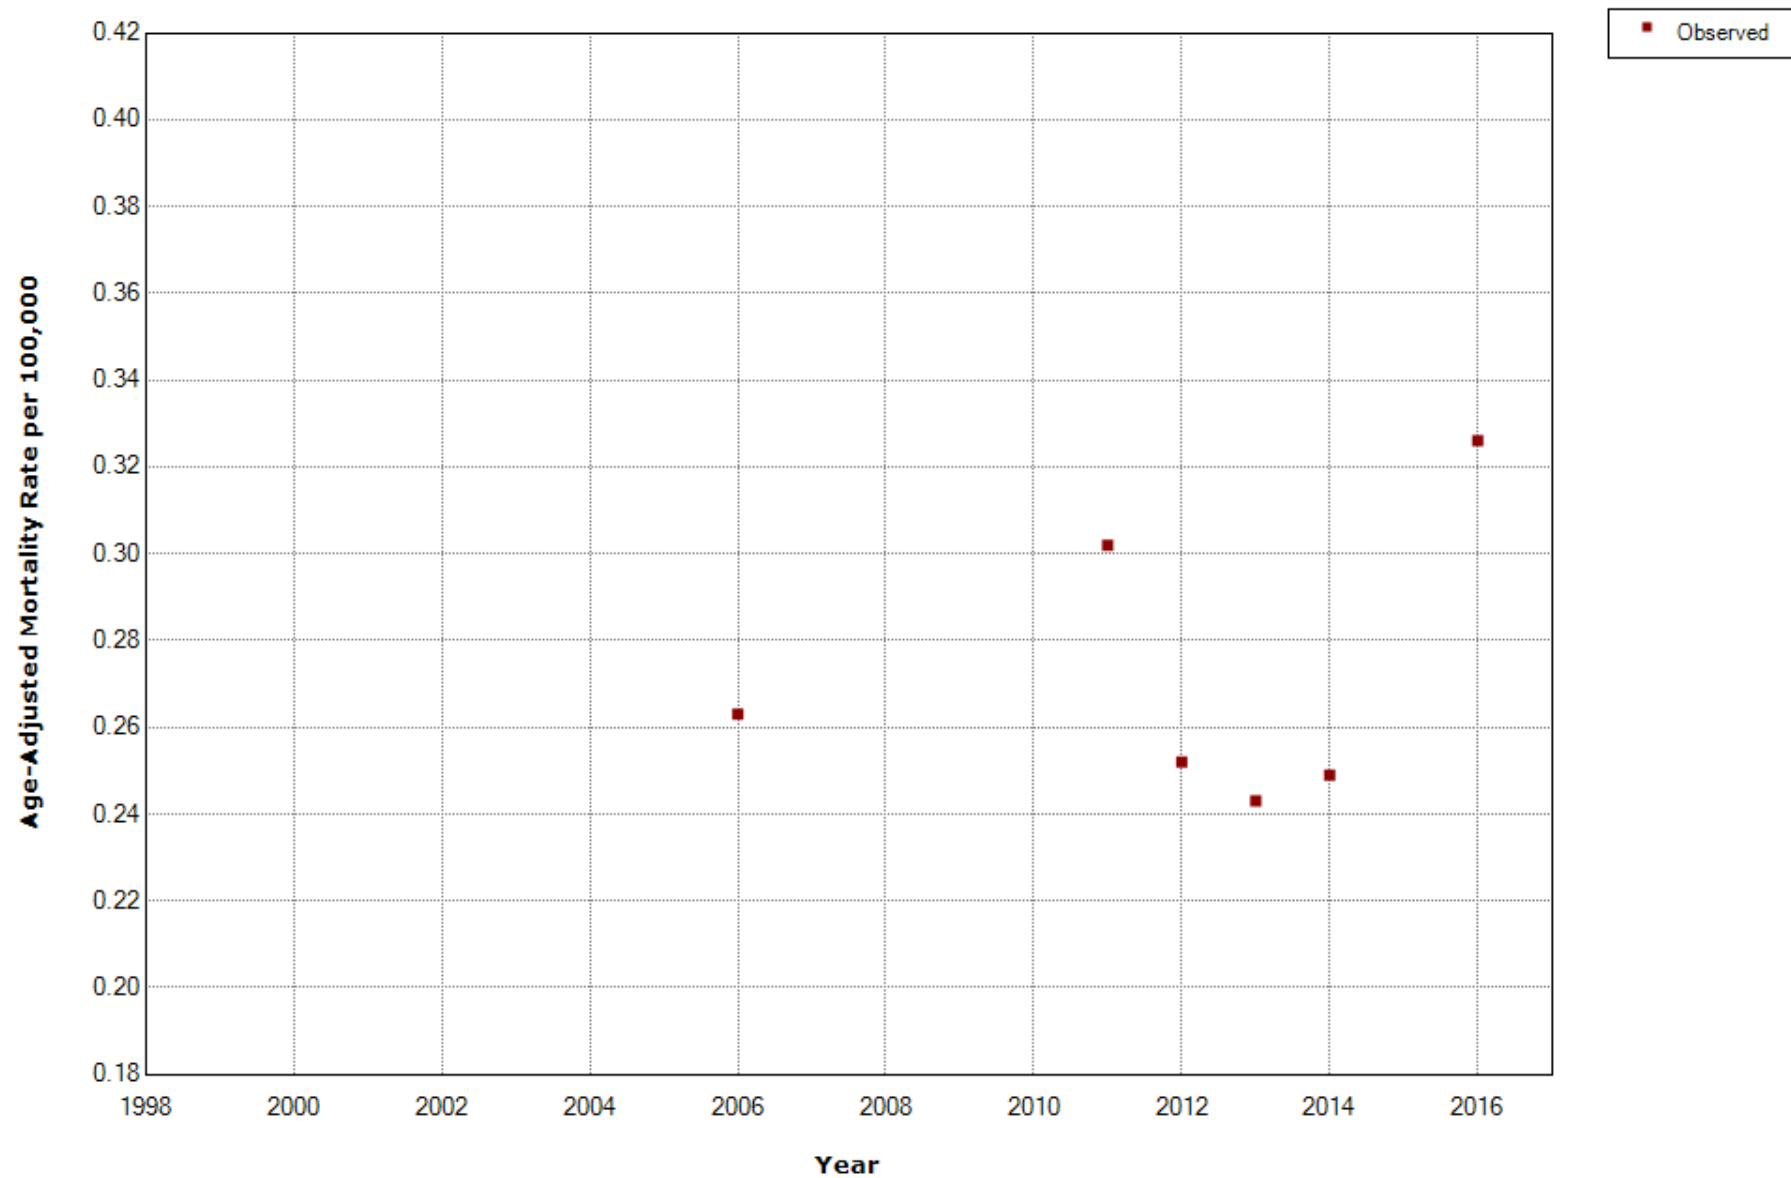

^ Indicates that the Annual Percent Change (APC) is significantly different from zero at the alpha = 0.05 level.

\* Joinpoint cannot process records with missing dependent variable values. Joinpoint will not analyze by-groups that have this error. (Row = 1458, Col = 1)

L00-L98 (Diseases of the skin and subcutaneous tissue) / NH Blacks: 0 Joinpoints

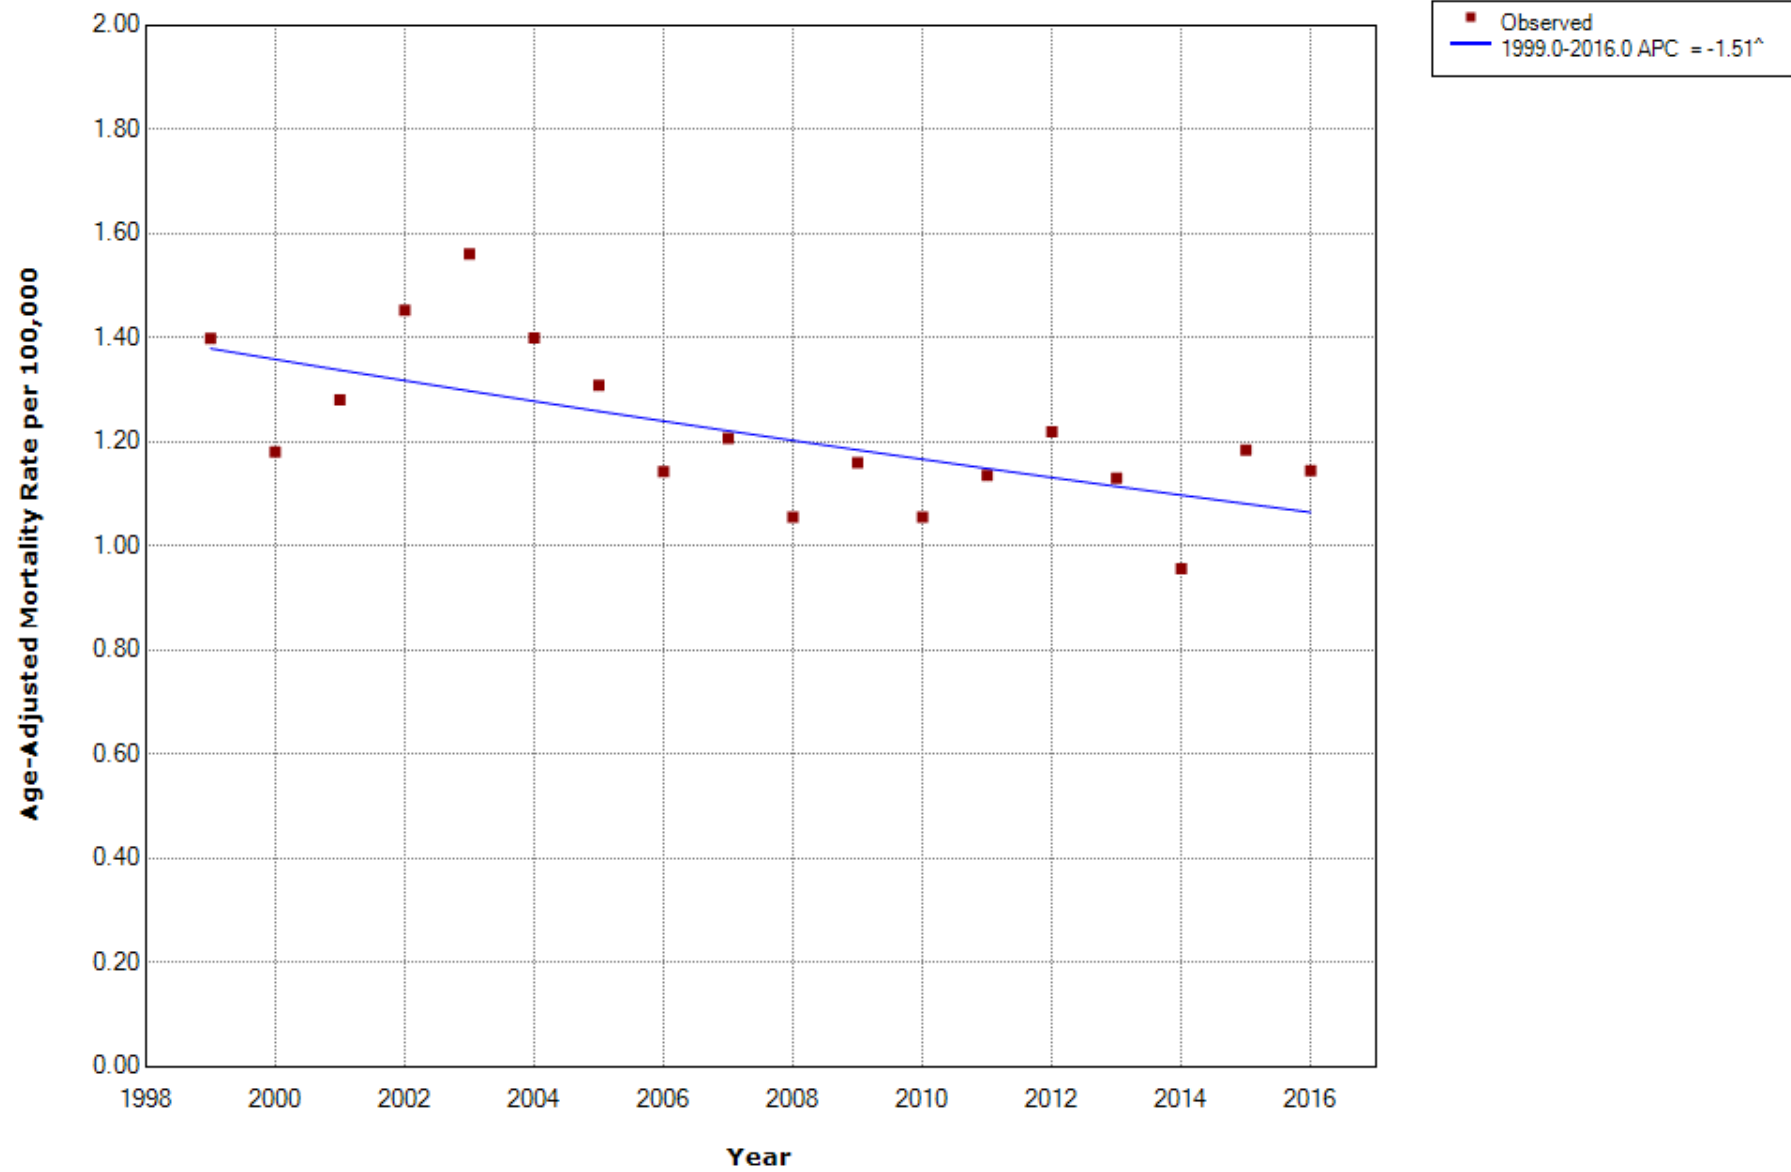

^ Indicates that the Annual Percent Change (APC) is significantly different from zero at the alpha = 0.05 level.  
Final Selected Model: 0 Joinpoints.

L00-L98 (Diseases of the skin and subcutaneous tissue) / NH whites: 0 Joinpoints

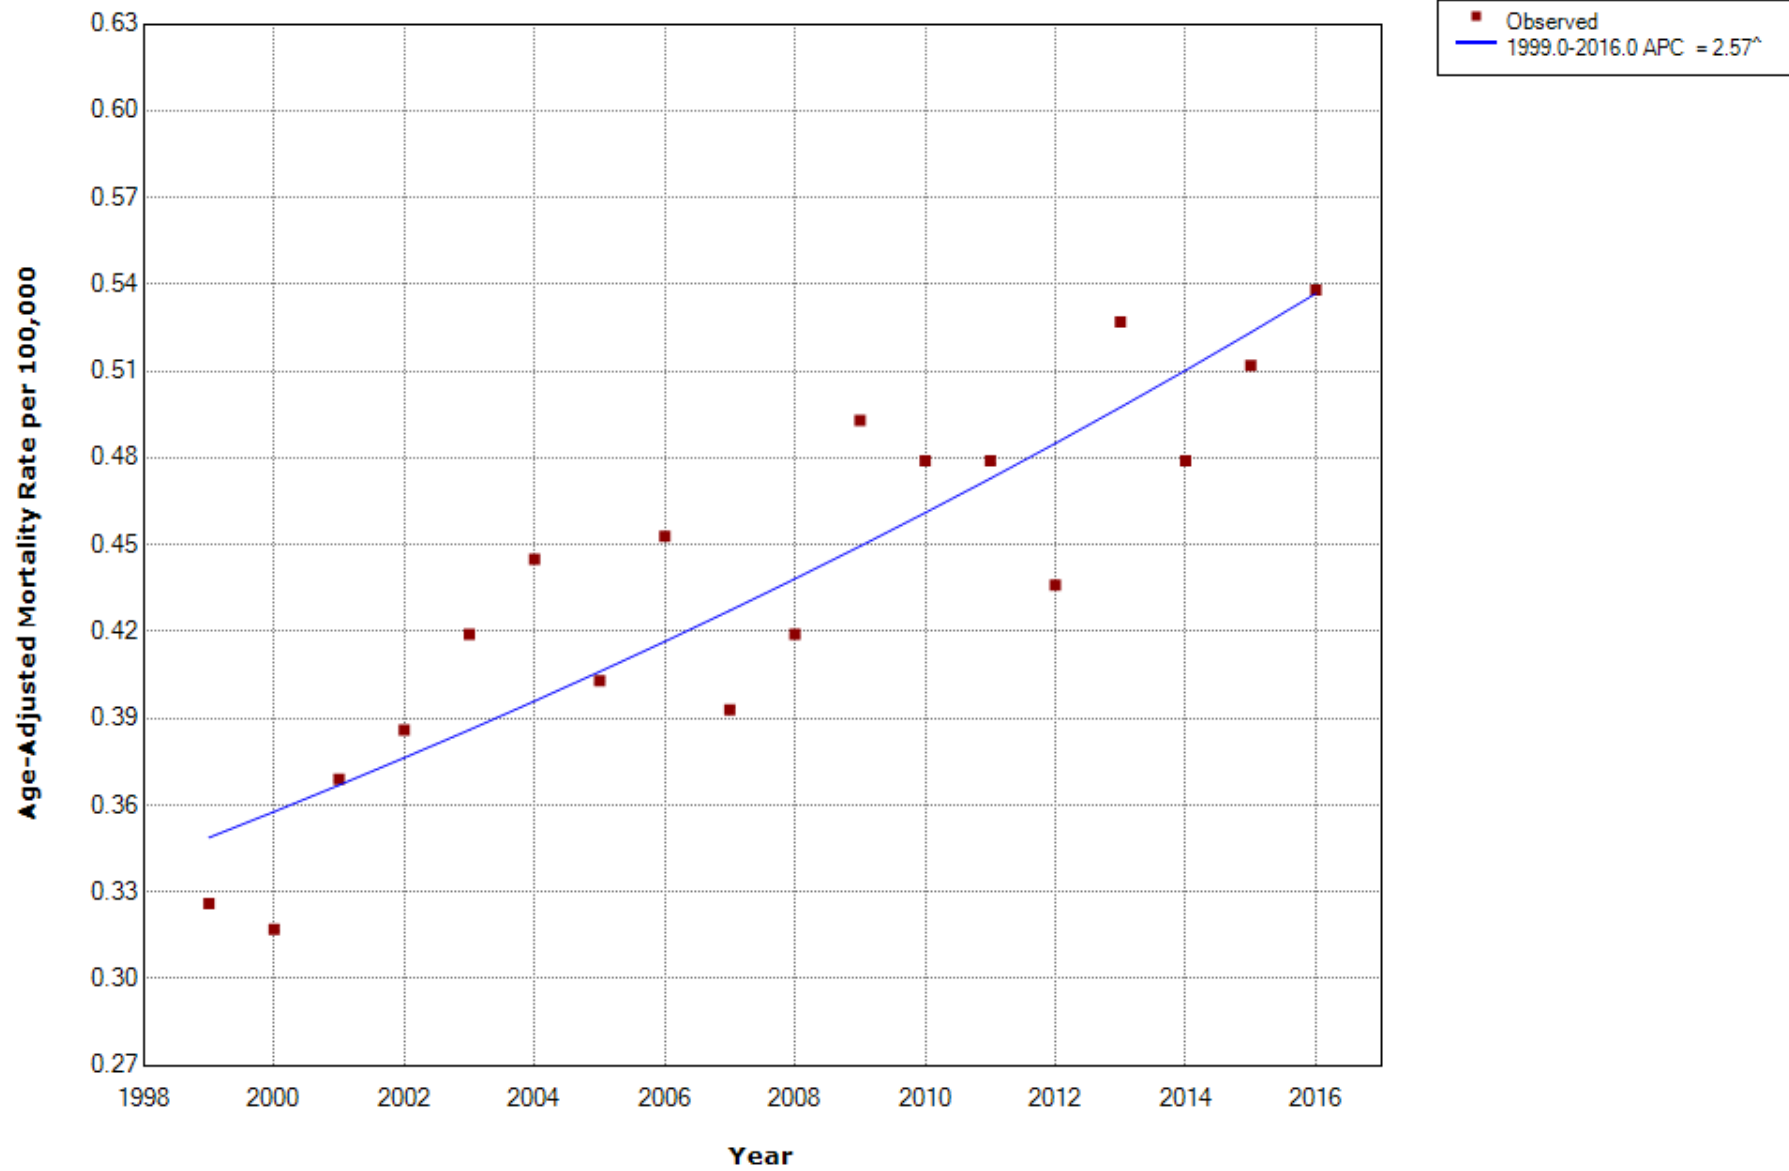

^ Indicates that the Annual Percent Change (APC) is significantly different from zero at the alpha = 0.05 level.  
Final Selected Model: 0 Joinpoints.

L00-L98 (Diseases of the skin and subcutaneous tissue) / Hispanics: 0 Joinpoints

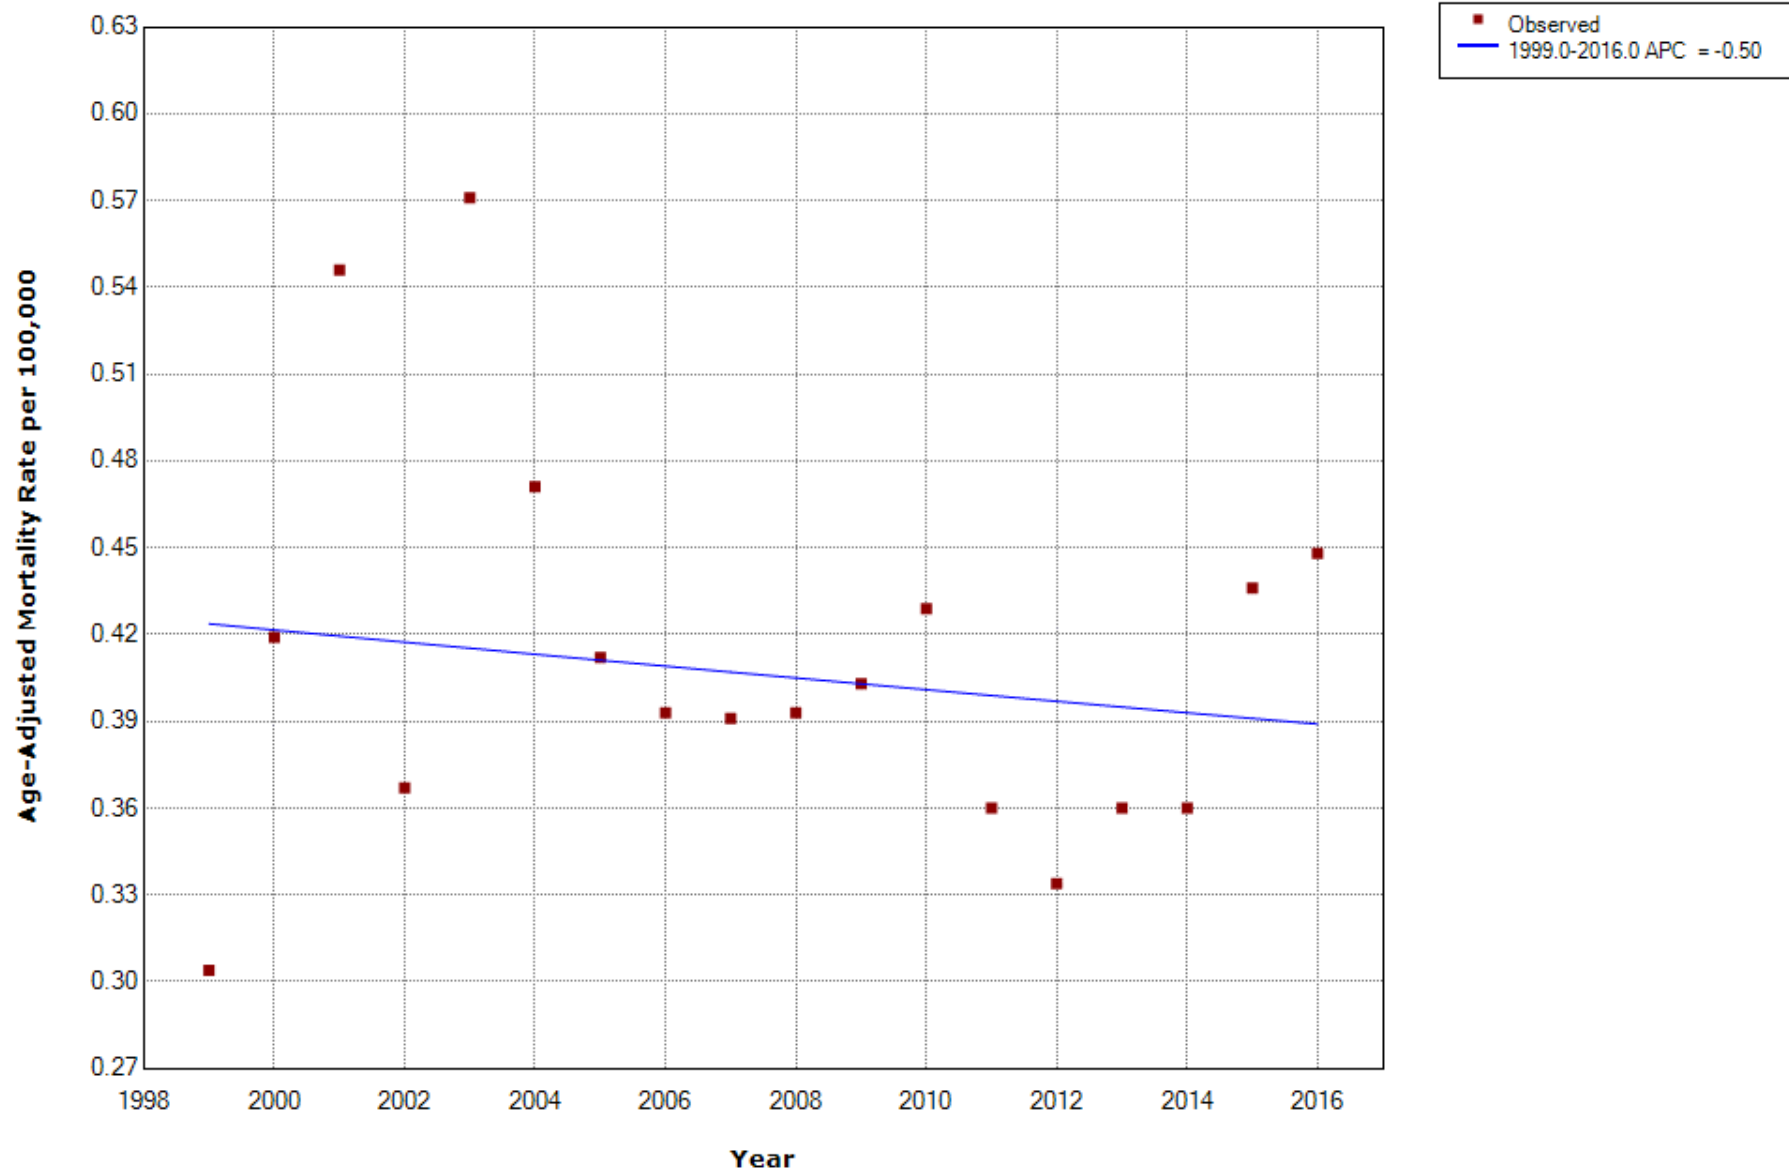

^ Indicates that the Annual Percent Change (APC) is significantly different from zero at the alpha = 0.05 level.  
Final Selected Model: 0 Joinpoints.

### Accidental drug poisoning (X40-X44) / NH AIAN: 1 Joinpoint

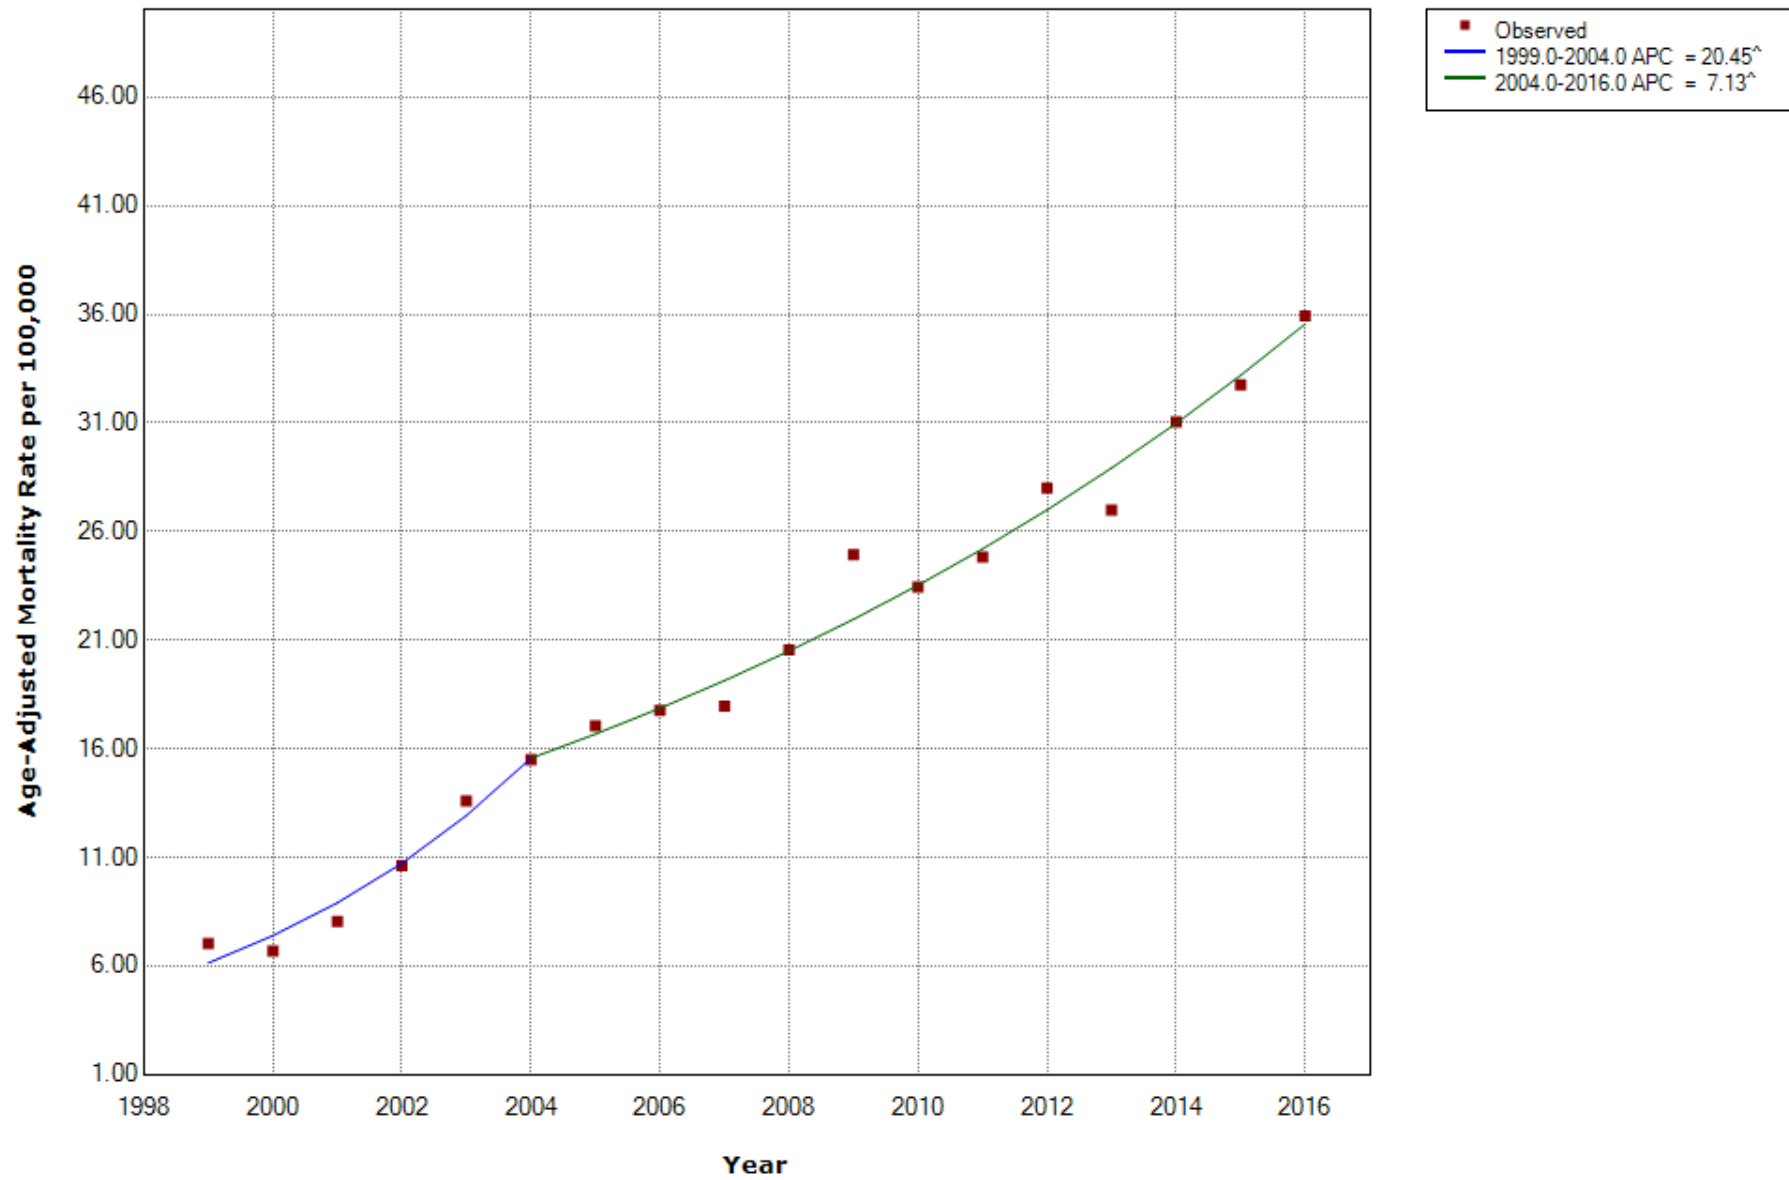

^ Indicates that the Annual Percent Change (APC) is significantly different from zero at the alpha = 0.05 level.  
Final Selected Model: 1 Joinpoint.



### Accidental drug poisoning (X40-X44) / NH API: 3 Joinpoints

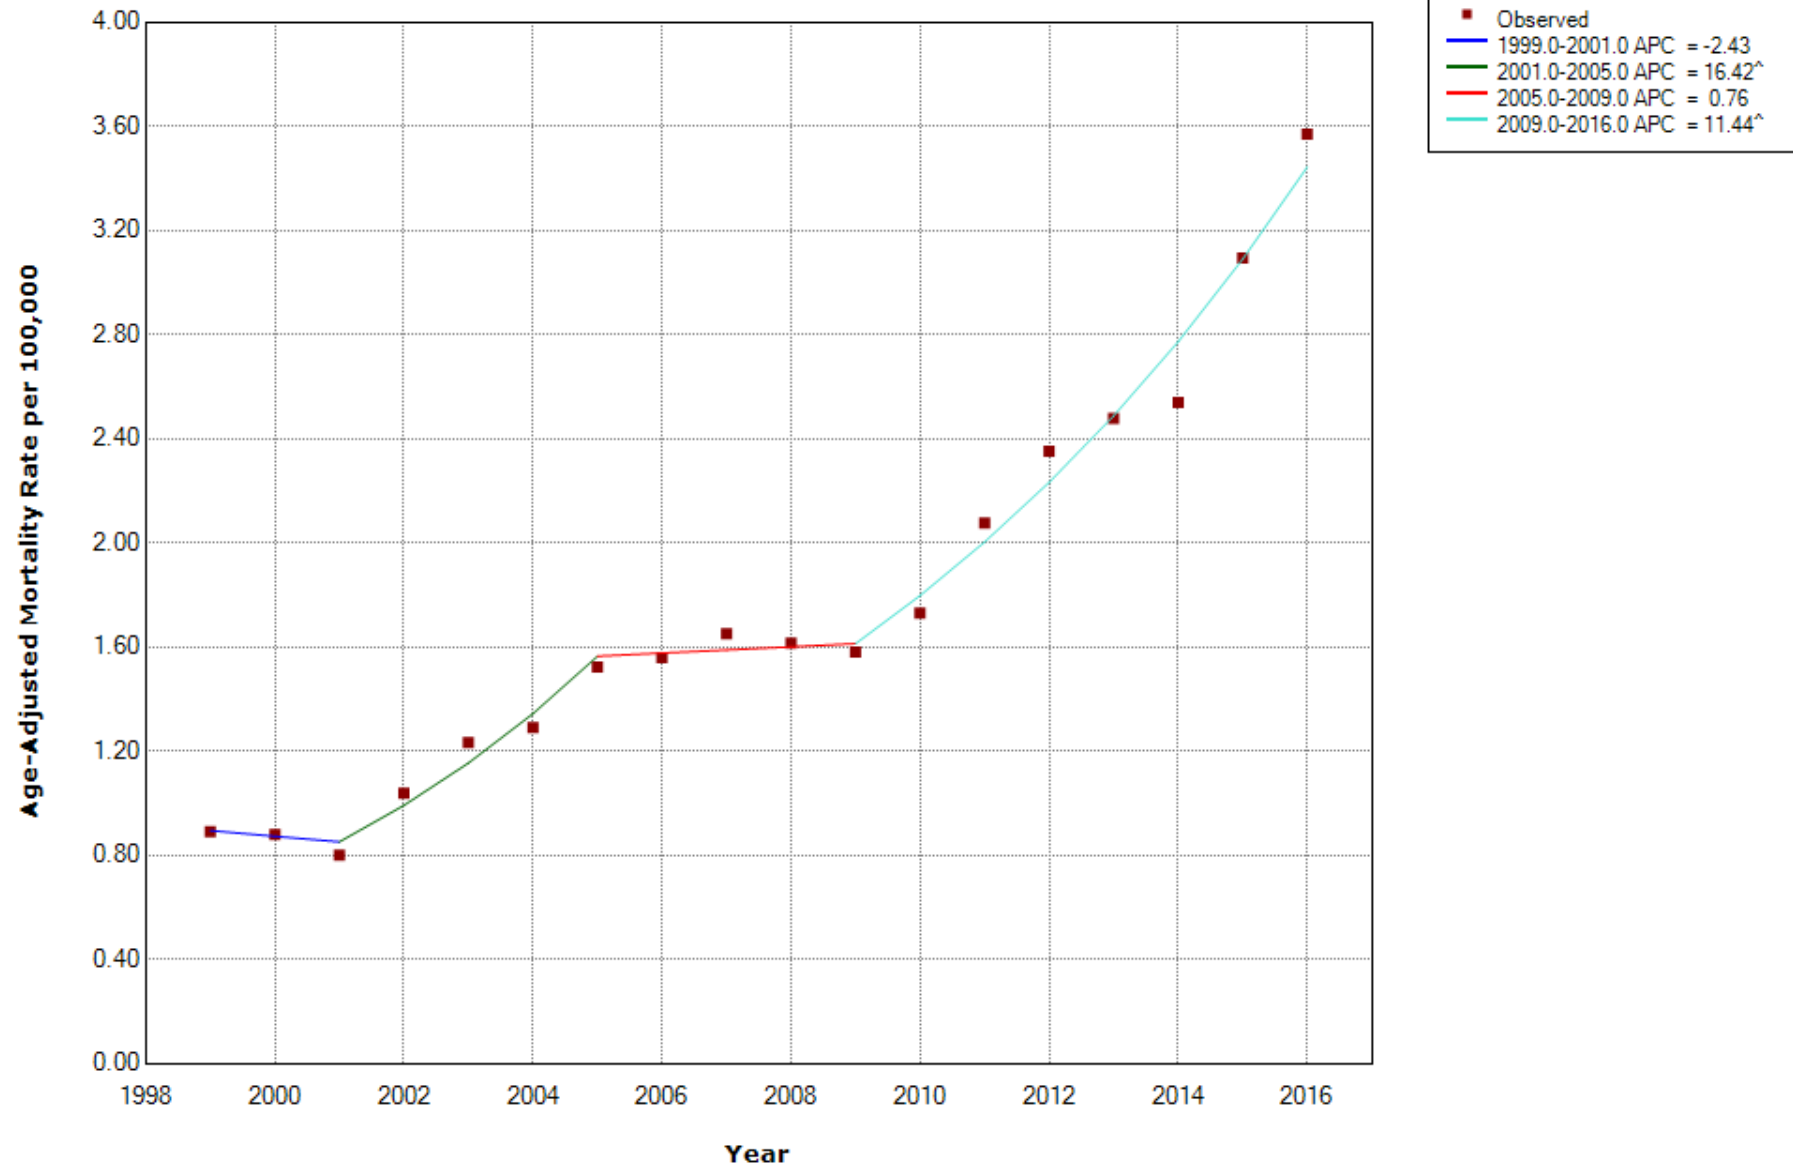

<sup>^</sup> Indicates that the Annual Percent Change (APC) is significantly different from zero at the alpha = 0.05 level.  
Final Selected Model: 3 Joinpoints.

### Accidental drug poisoning (X40-X44) / NH Blacks: 3 Joinpoints

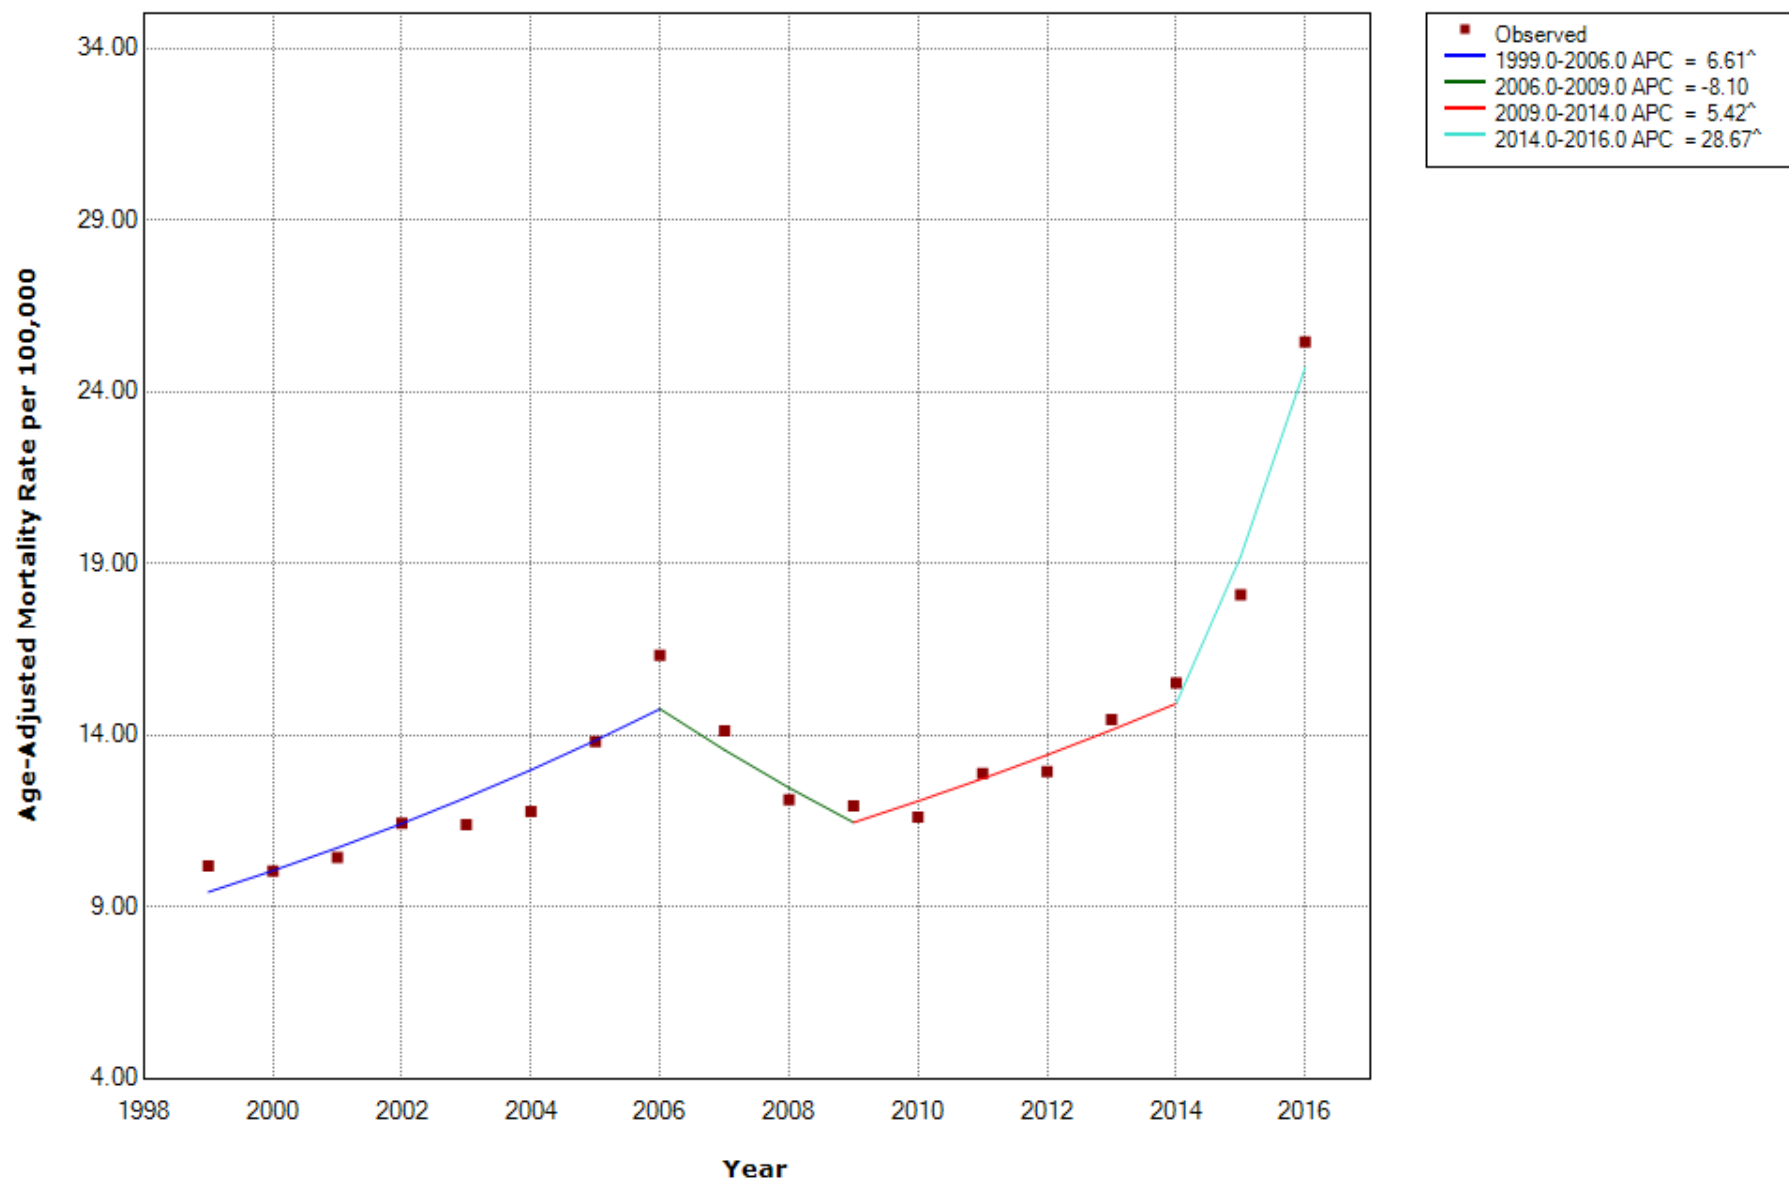

^ Indicates that the Annual Percent Change (APC) is significantly different from zero at the alpha = 0.05 level.  
Final Selected Model: 3 Joinpoints.

### Accidental drug poisoning (X40-X44) / NH whites: 2 Joinpoints

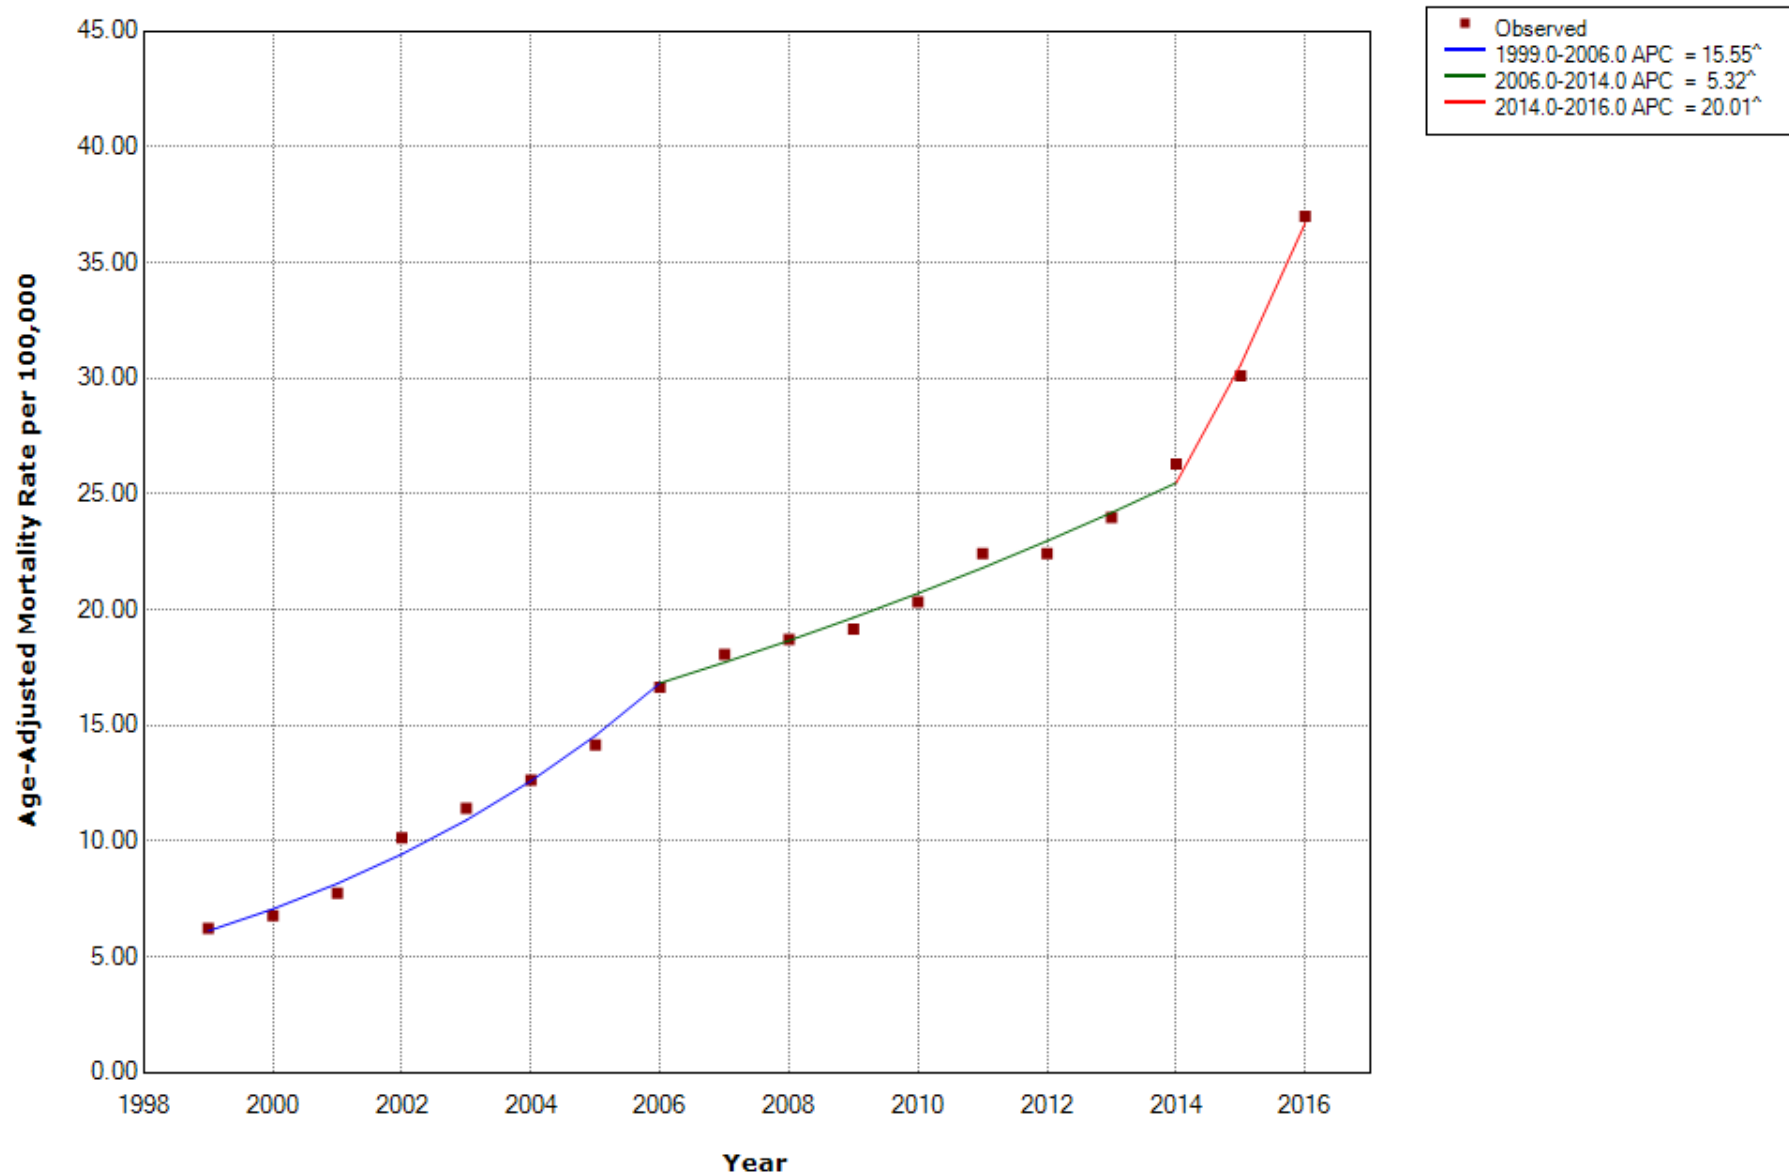

<sup>^</sup> Indicates that the Annual Percent Change (APC) is significantly different from zero at the alpha = 0.05 level.  
Final Selected Model: 2 Joinpoints.

### Accidental drug poisoning (X40-X44) / Hispanics: 1 Joinpoint

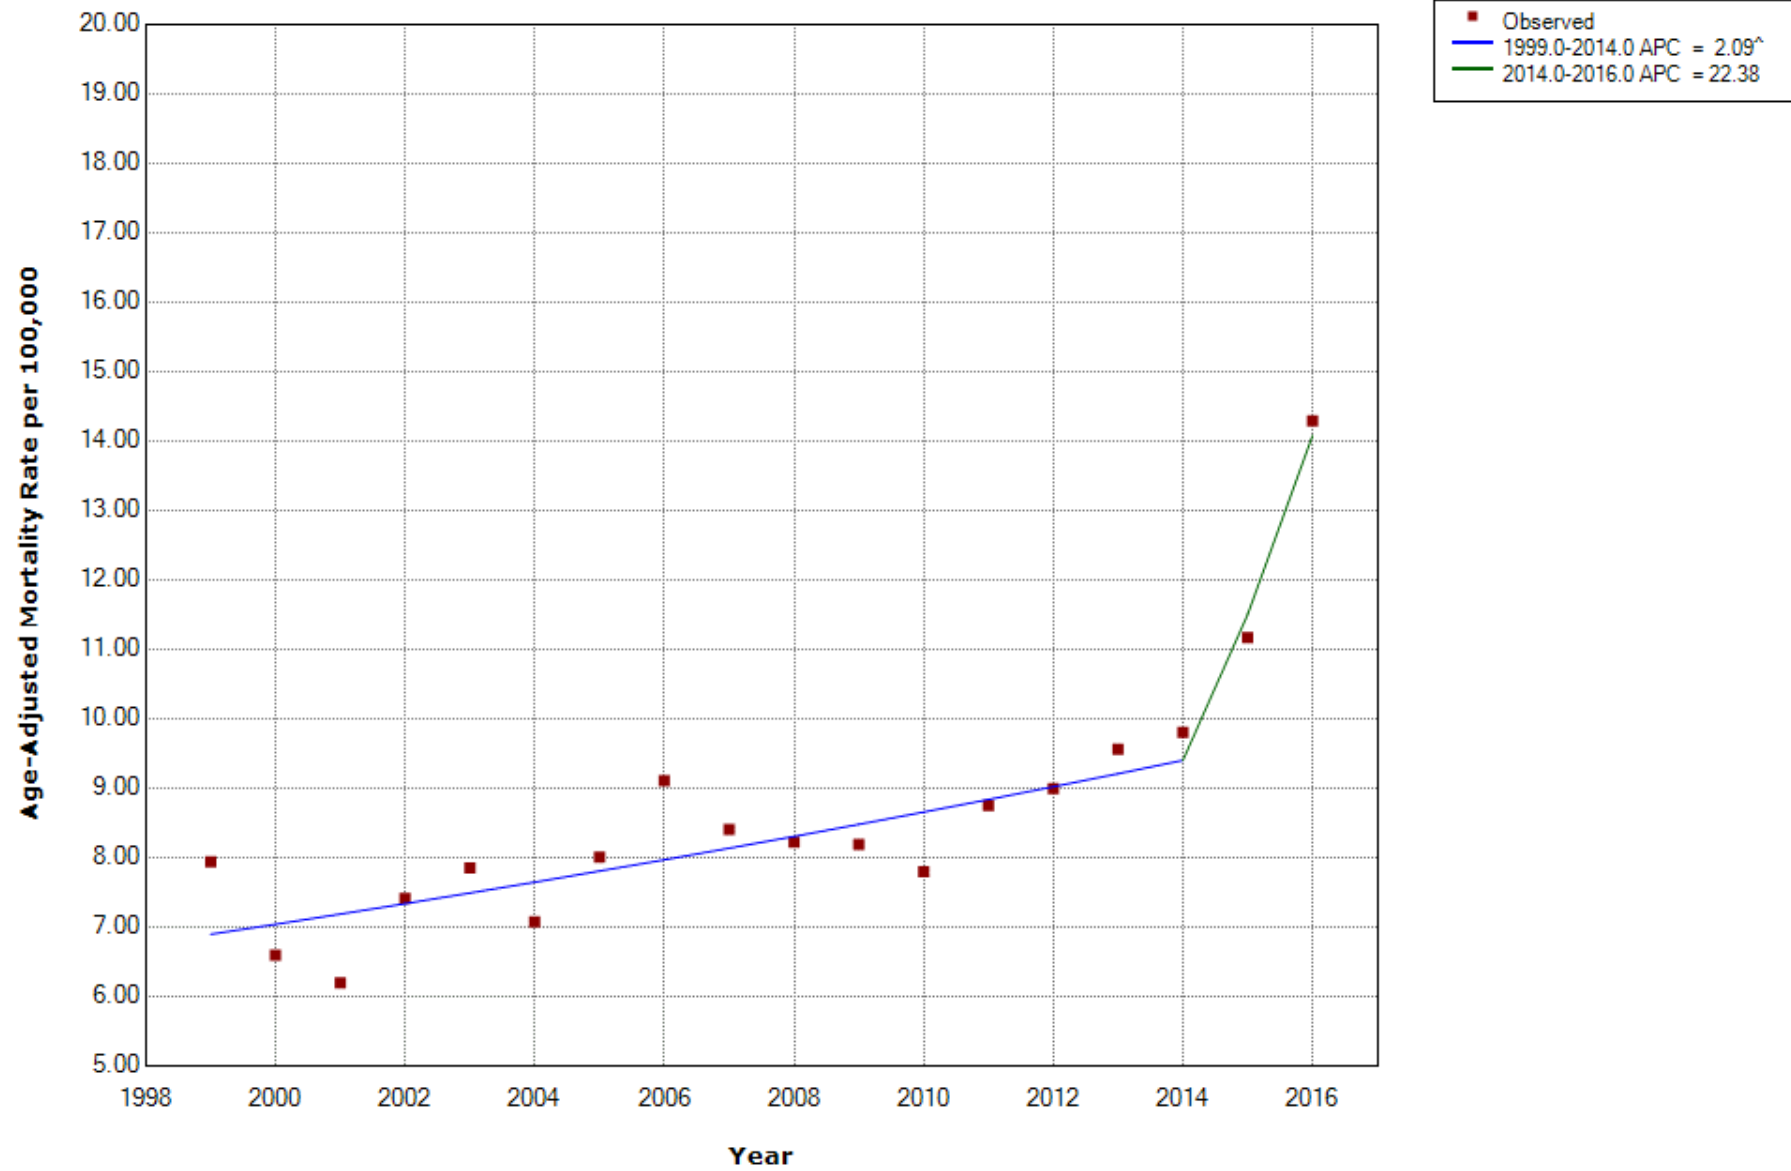

^ Indicates that the Annual Percent Change (APC) is significantly different from zero at the alpha = 0.05 level.  
Final Selected Model: 1 Joinpoint.

### Accidental alcohol poisoning (X45) / NH AIAN: Observed

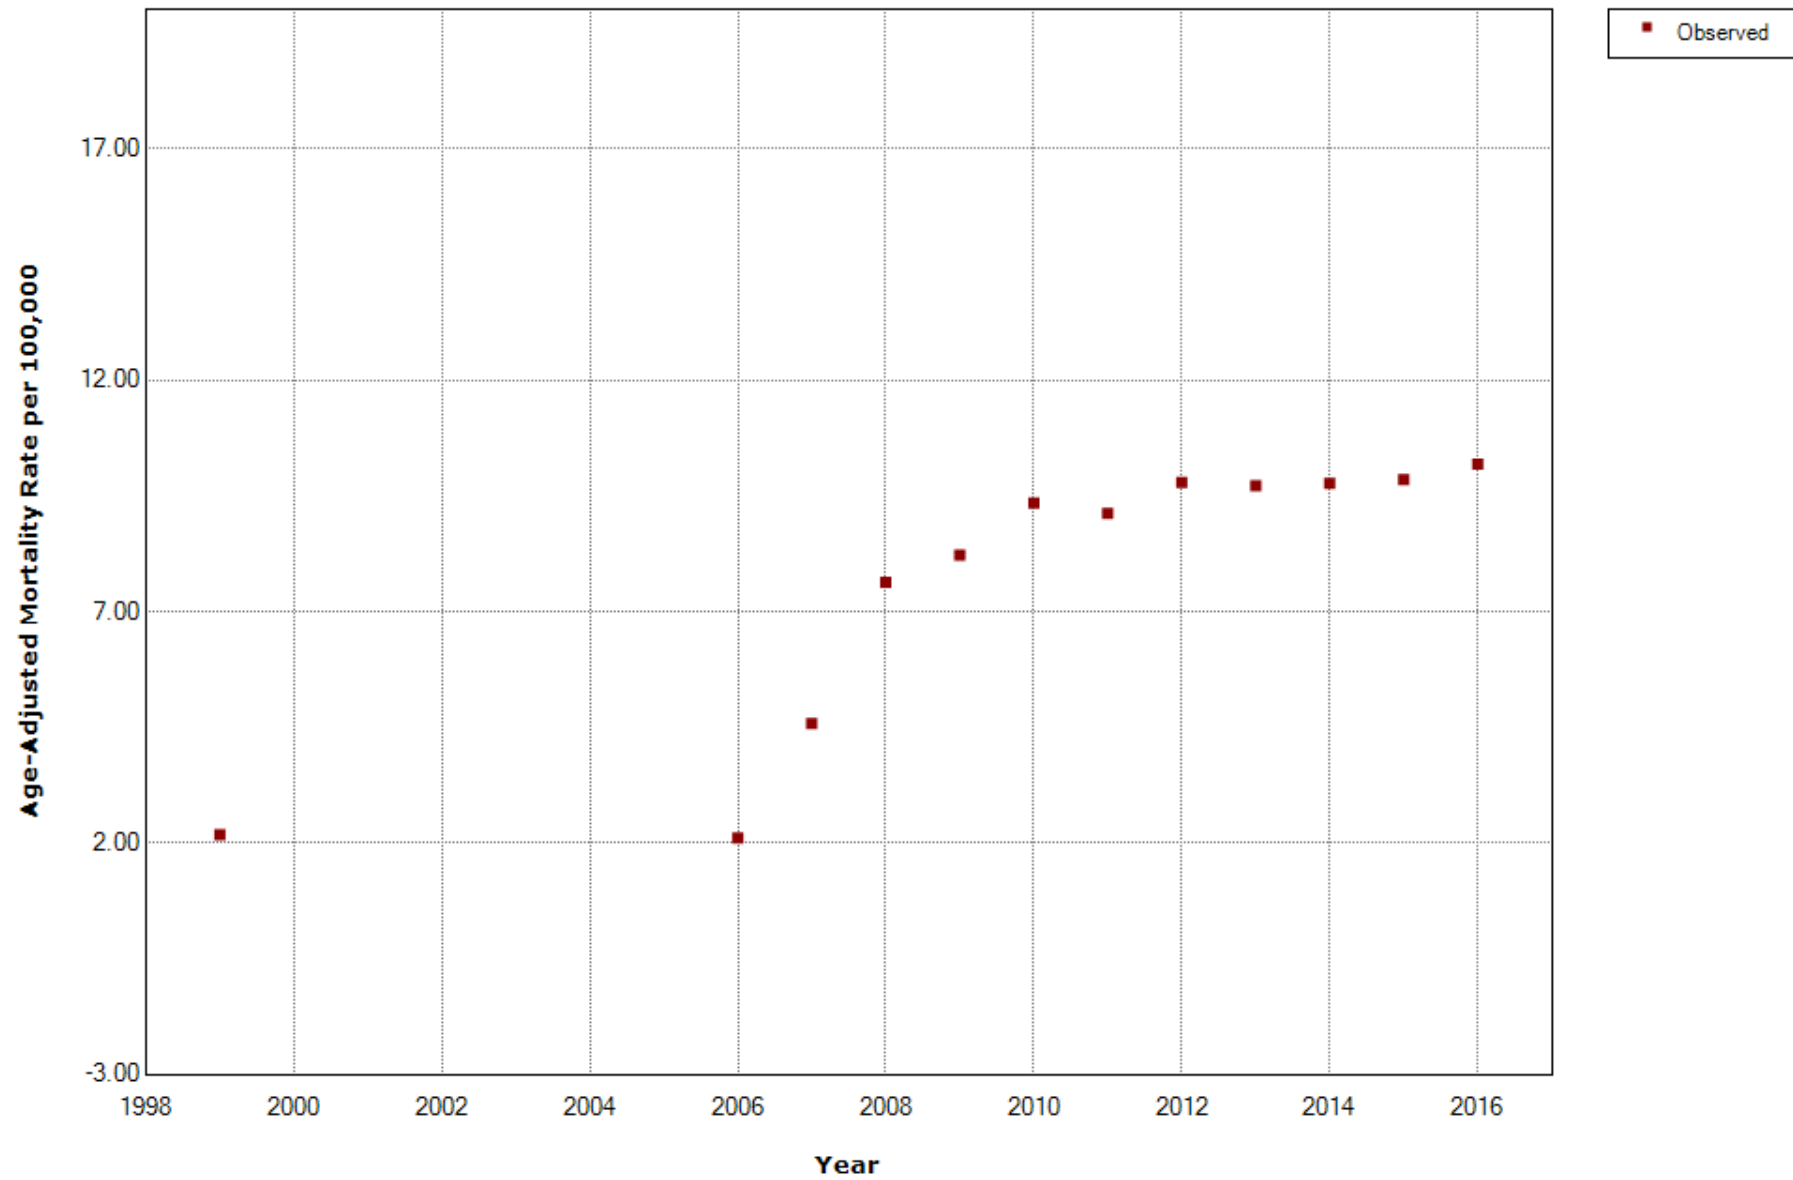

^ Indicates that the Annual Percent Change (APC) is significantly different from zero at the alpha = 0.05 level.

\* Joinpoint cannot process records with missing dependent variable values. Joinpoint will not analyze by-groups that have this error. (Row = 91, Col = 1)

### Accidental alcohol poisoning (X45) / NH API: Observed

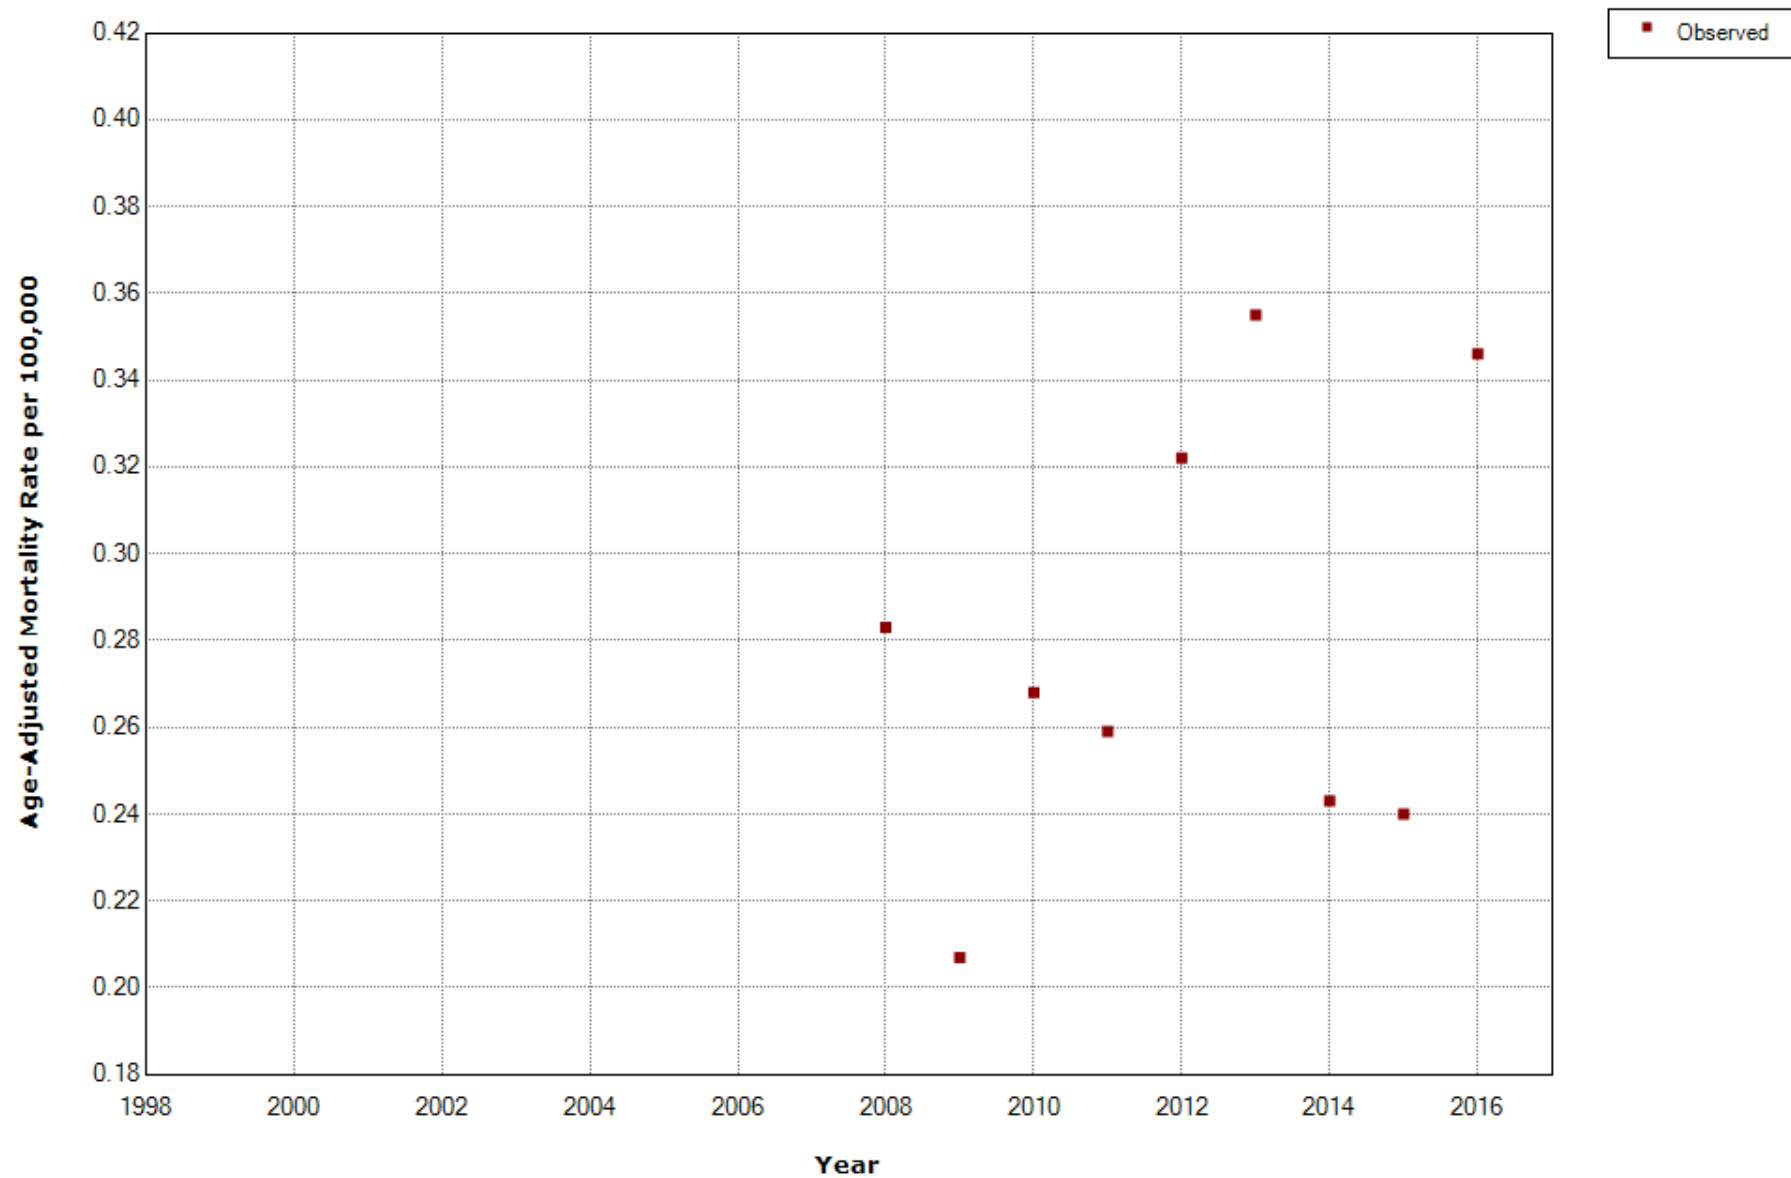

^ Indicates that the Annual Percent Change (APC) is significantly different from zero at the alpha = 0.05 level.

\* Joinpoint cannot process records with missing dependent variable values. Joinpoint will not analyze by-groups that have this error. (Row = 108, Col = 1)

### Accidental alcohol poisoning (X45) / NH Blacks: 2 Joinpoints

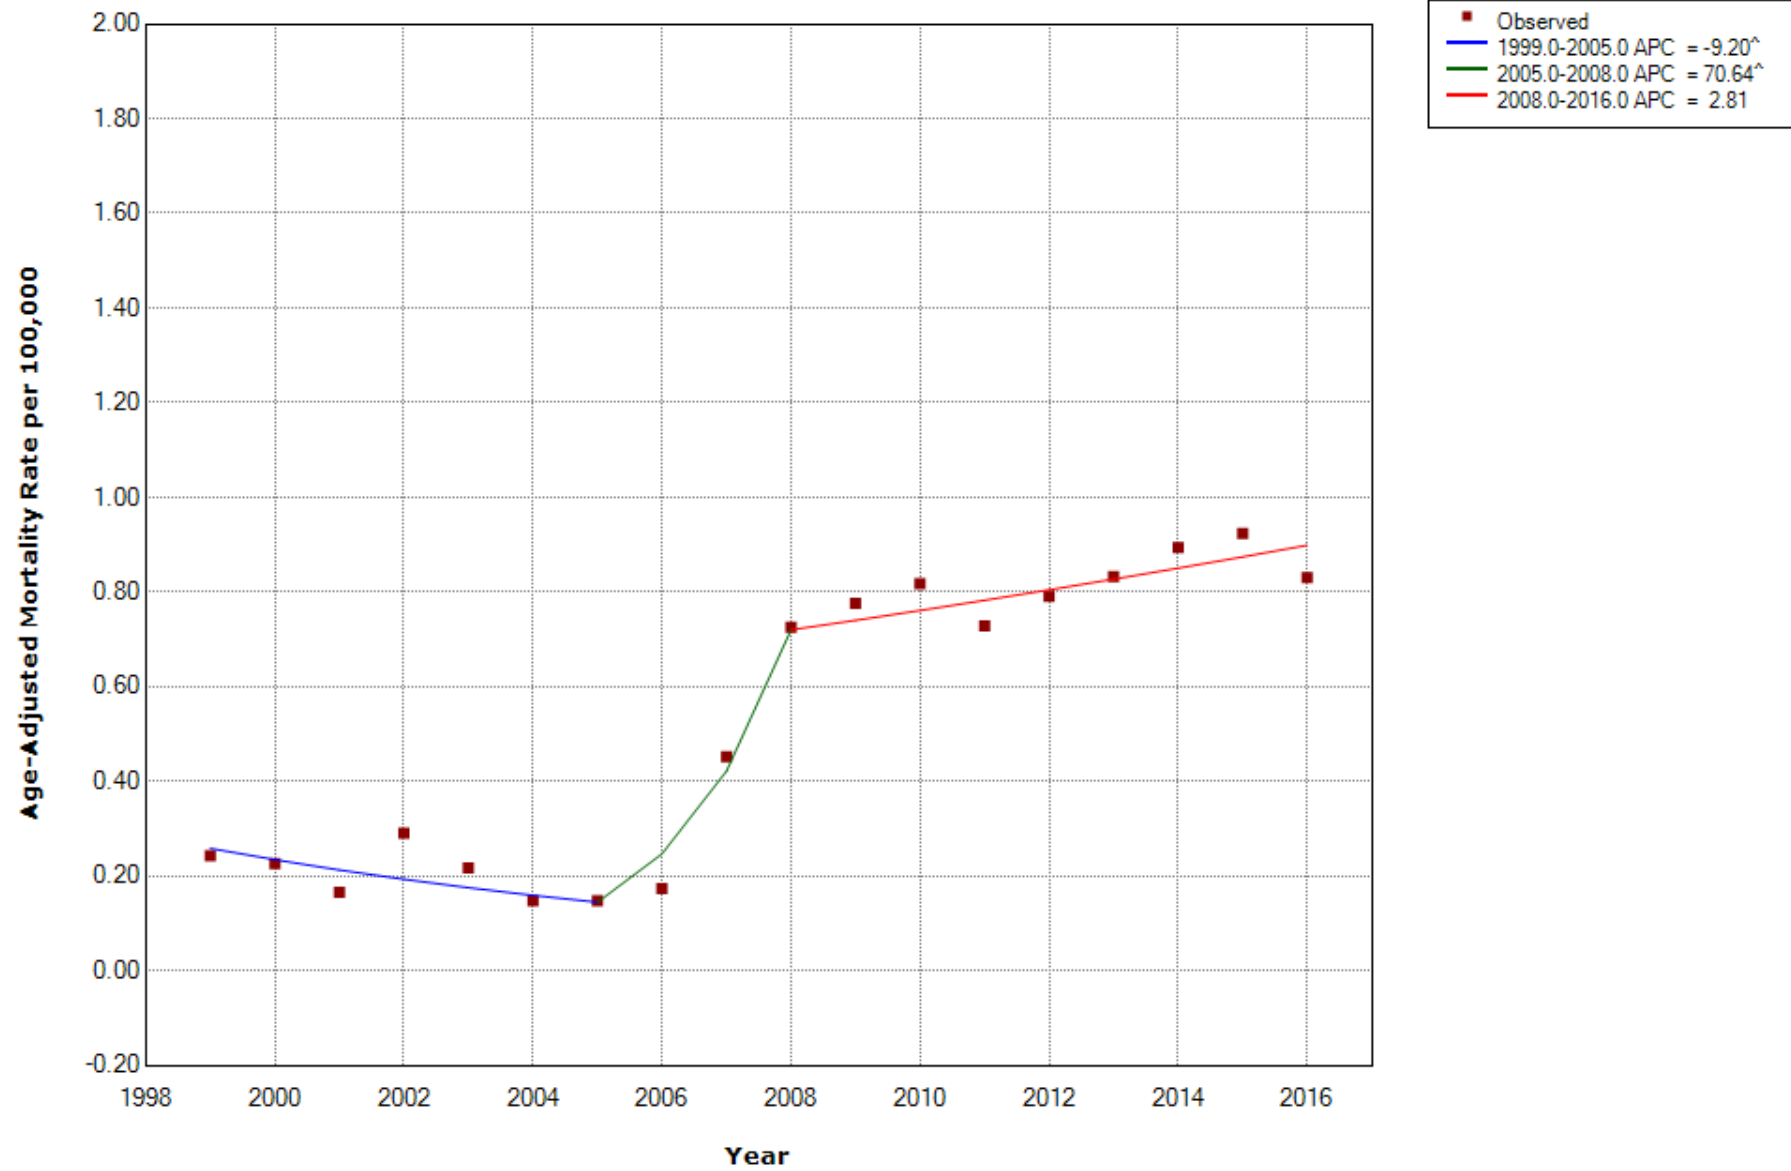

^ Indicates that the Annual Percent Change (APC) is significantly different from zero at the alpha = 0.05 level.  
Final Selected Model: 2 Joinpoints.

### Accidental alcohol poisoning (X45) / NH whites: 2 Joinpoints

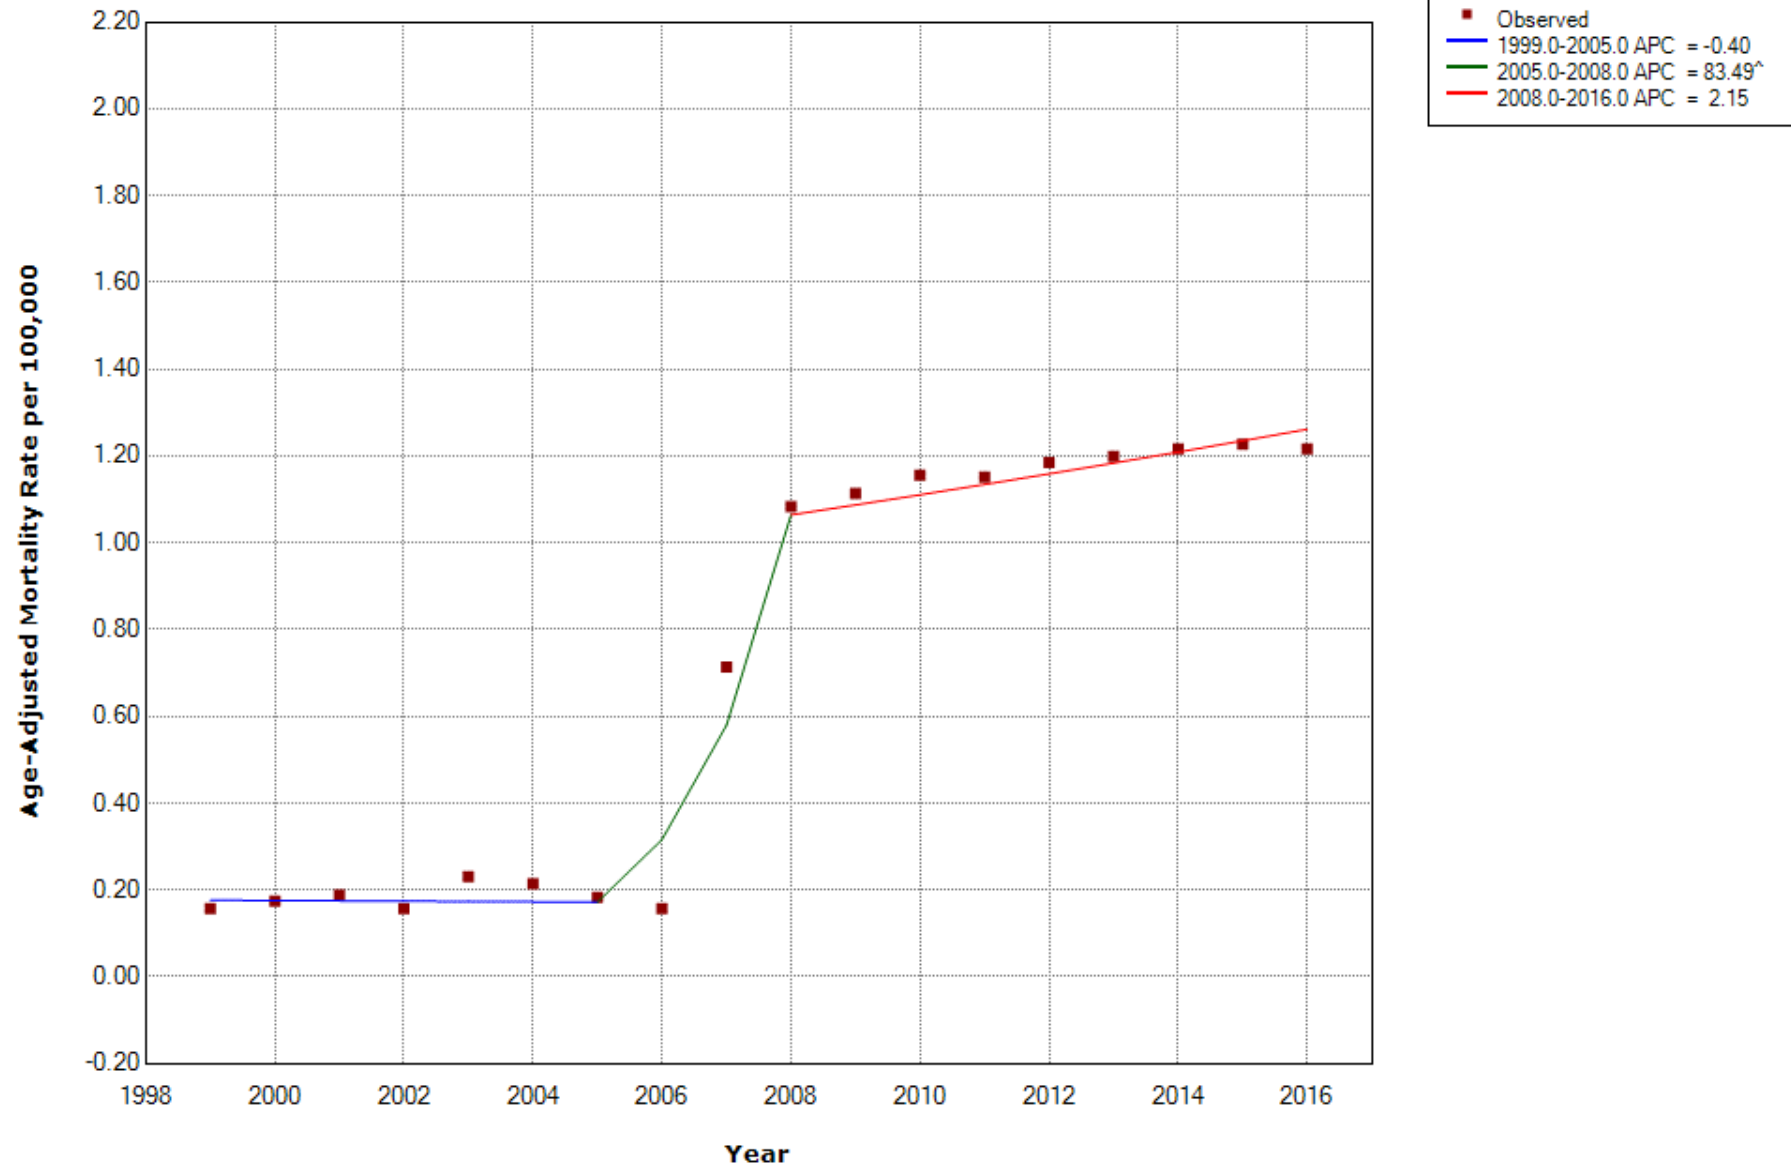

<sup>^</sup> Indicates that the Annual Percent Change (APC) is significantly different from zero at the alpha = 0.05 level.  
Final Selected Model: 2 Joinpoints.



### Accidental alcohol poisoning (X45) / Hispanics: 2 Joinpoints

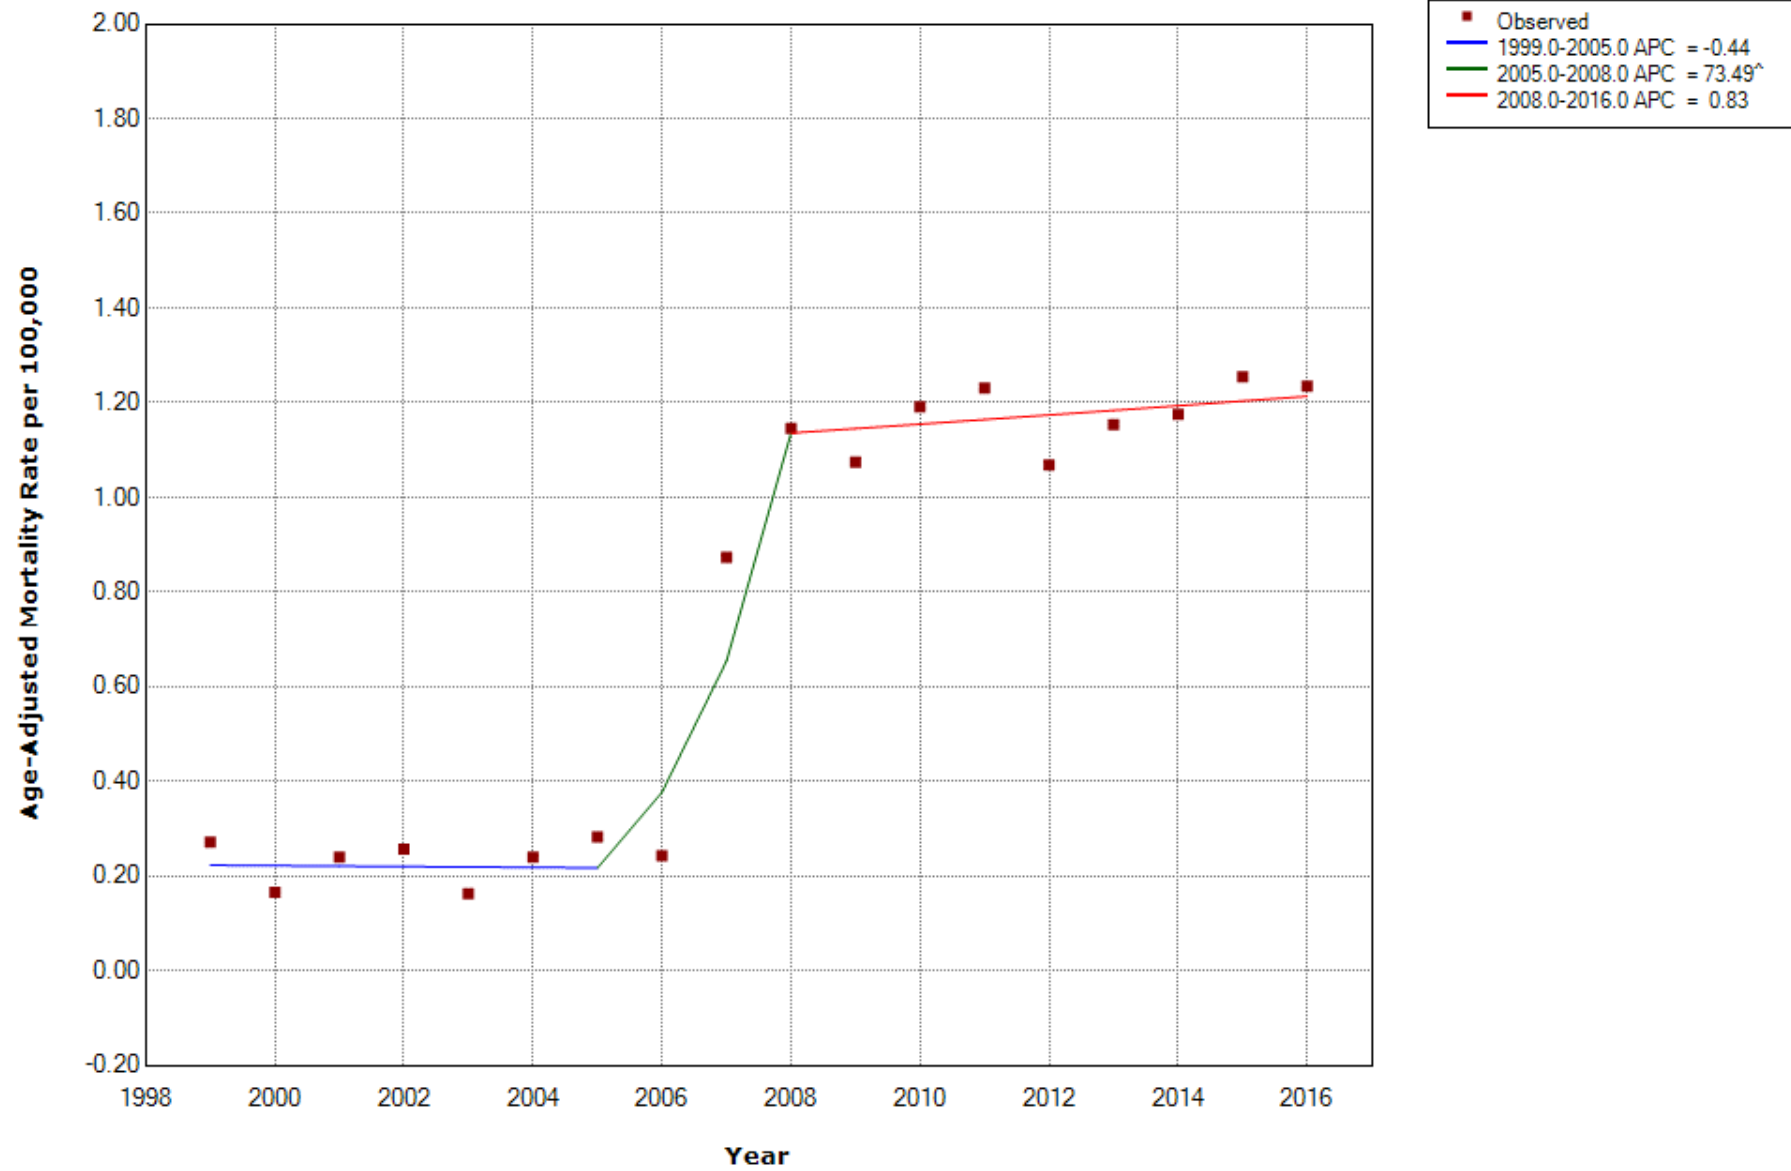

^ Indicates that the Annual Percent Change (APC) is significantly different from zero at the alpha = 0.05 level.  
Final Selected Model: 2 Joinpoints.

### Suicide (X60-X84) / NH AIAN: 1 Joinpoint

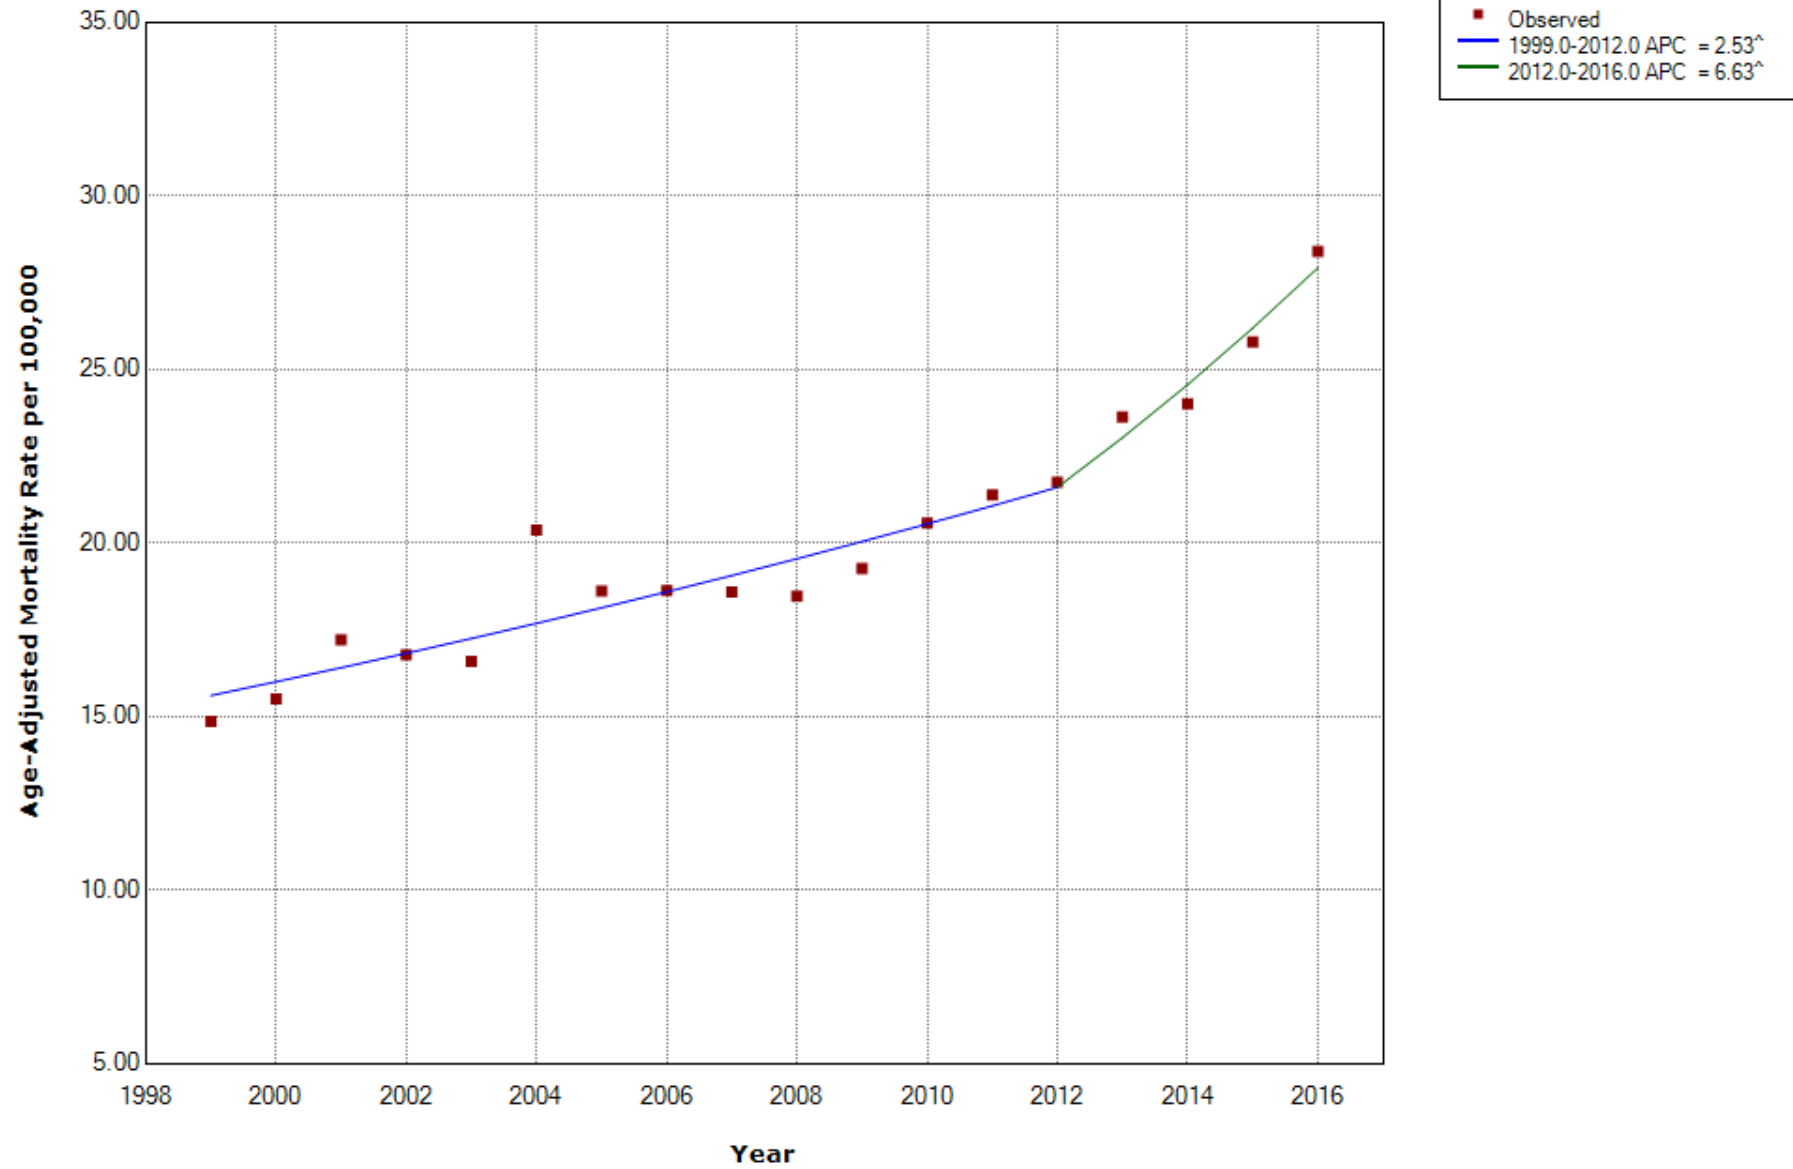

^ Indicates that the Annual Percent Change (APC) is significantly different from zero at the alpha = 0.05 level.  
Final Selected Model: 1 Joinpoint.

### Suicide (X60-X84) / NH API: 1 Joinpoint

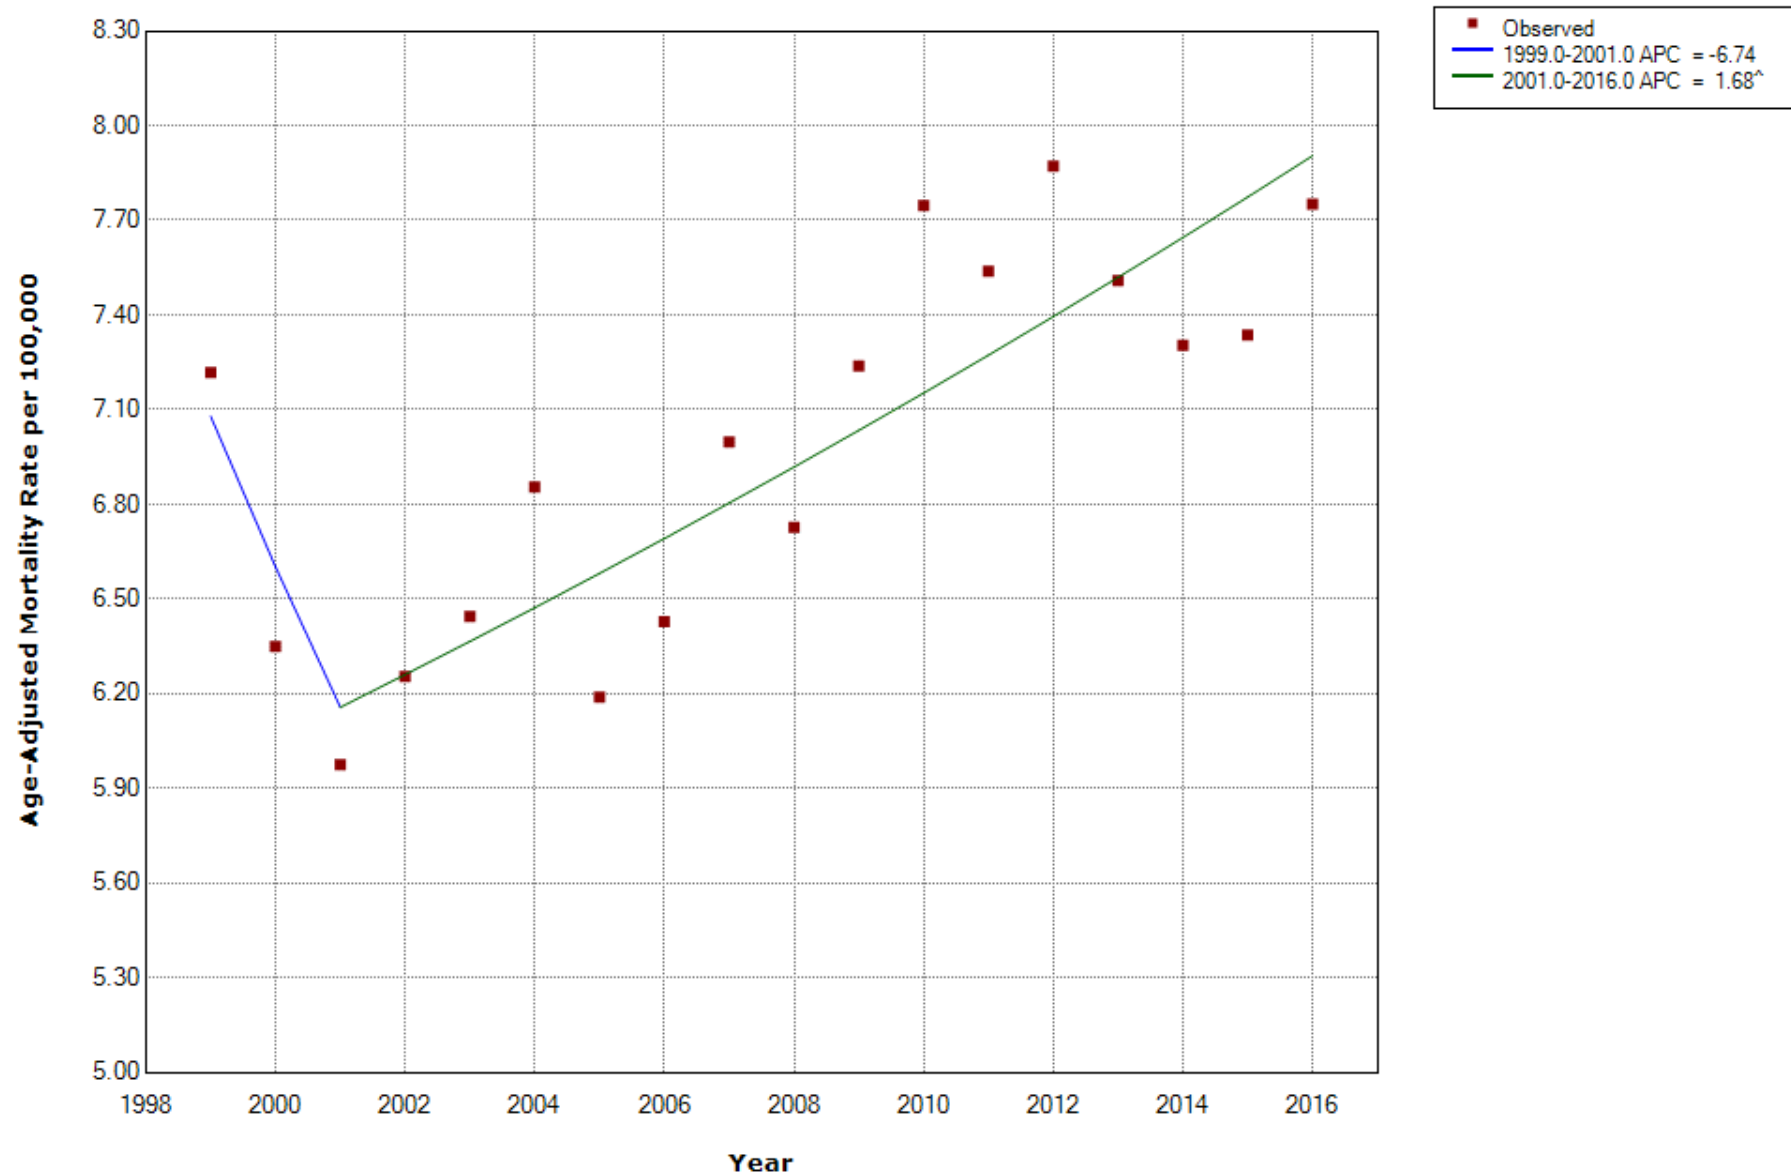

^ Indicates that the Annual Percent Change (APC) is significantly different from zero at the alpha = 0.05 level.  
Final Selected Model: 1 Joinpoint.

### Suicide (X60-X84) / NH Blacks: 1 Joinpoint

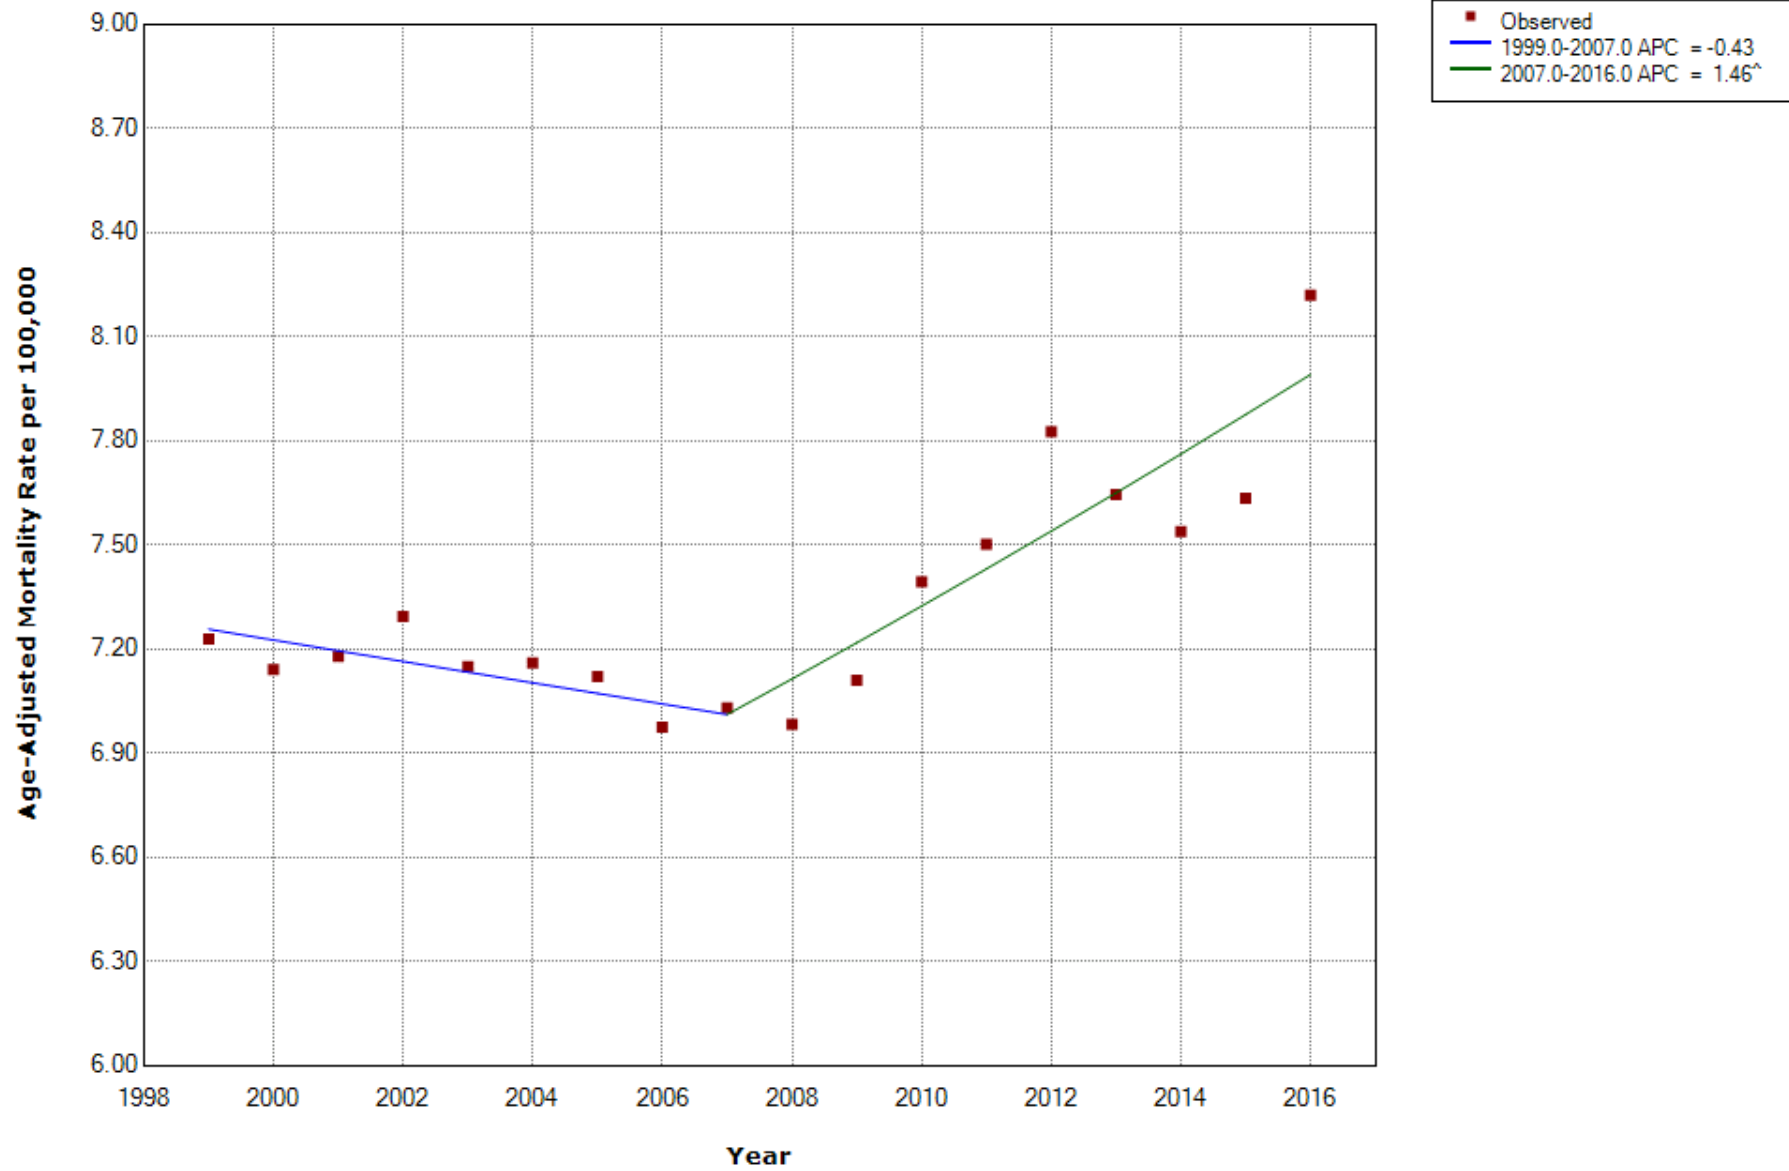

^ Indicates that the Annual Percent Change (APC) is significantly different from zero at the alpha = 0.05 level.  
Final Selected Model: 1 Joinpoint.

### Suicide (X60-X84) / NH whites: 3 Joinpoints

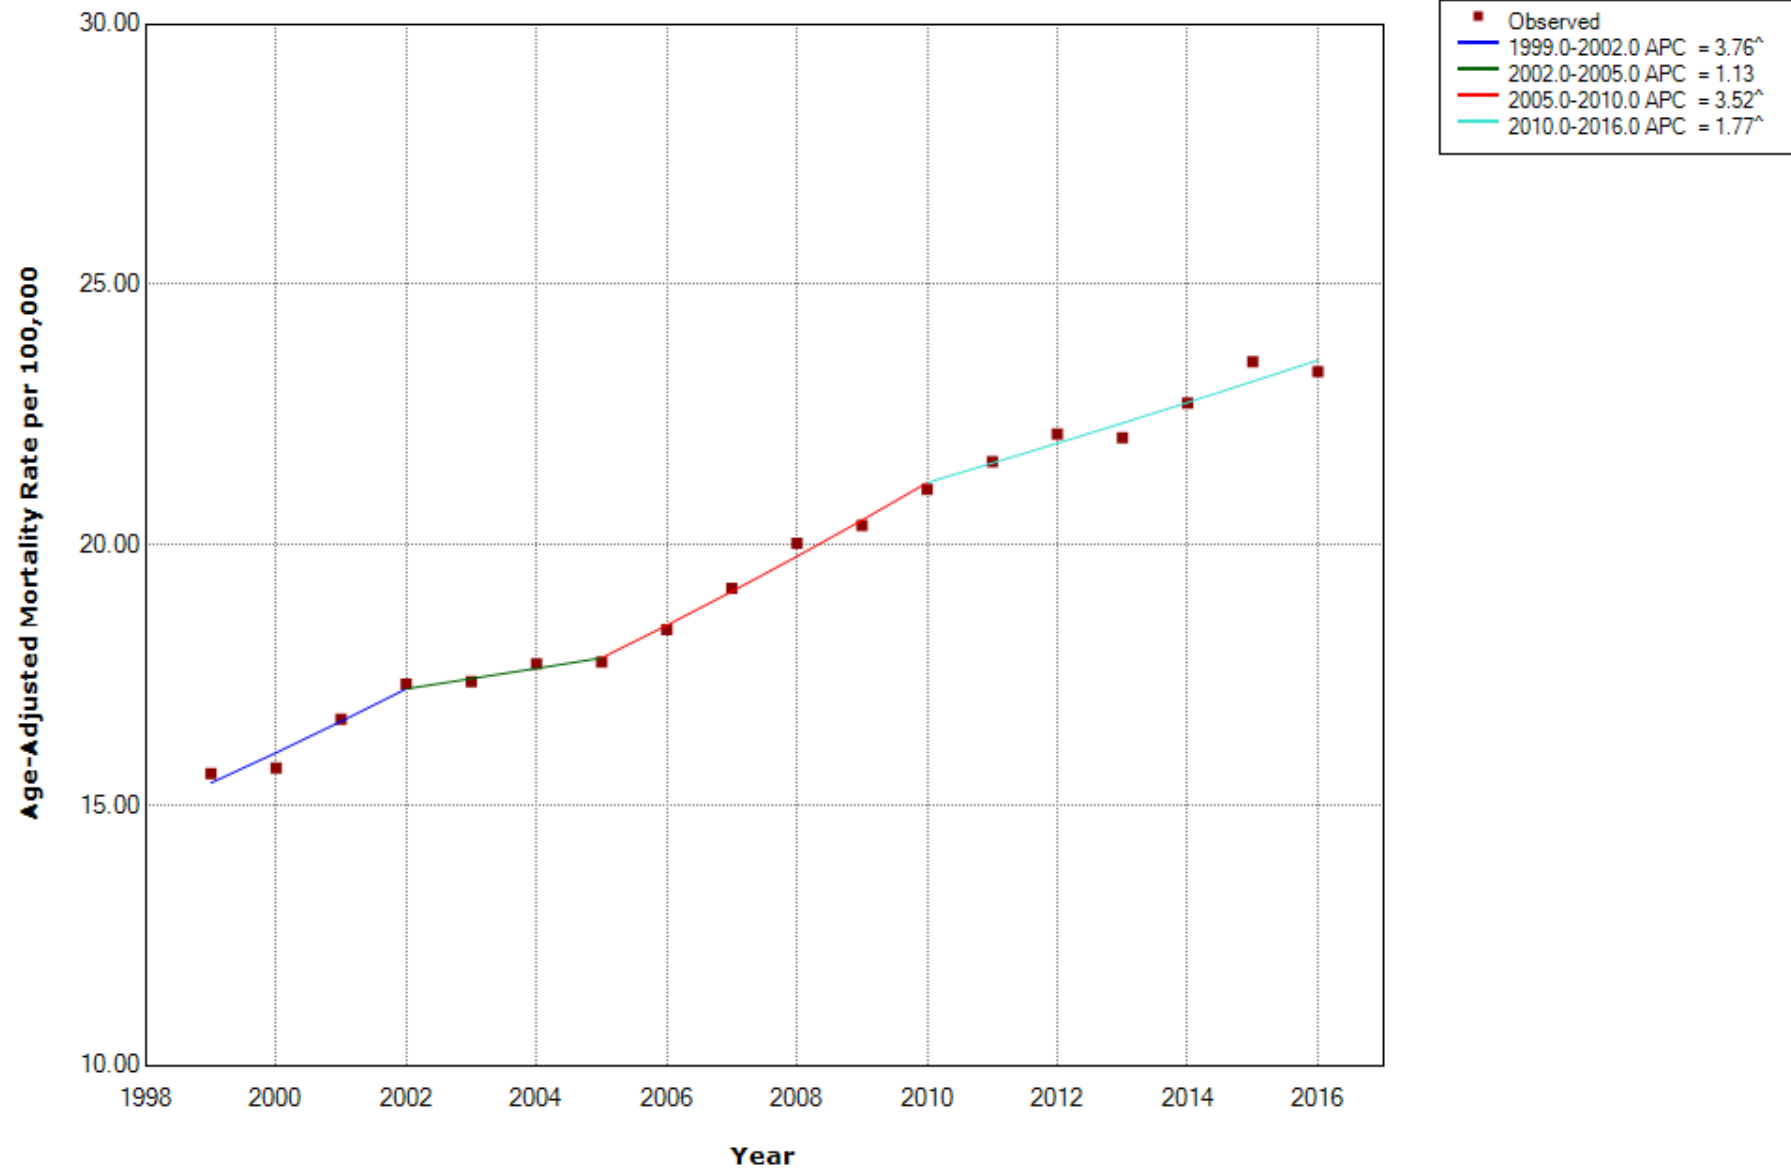

^ Indicates that the Annual Percent Change (APC) is significantly different from zero at the alpha = 0.05 level.  
Final Selected Model: 3 Joinpoints.

### Suicide (X60-X84) / Hispanics: 1 Joinpoint

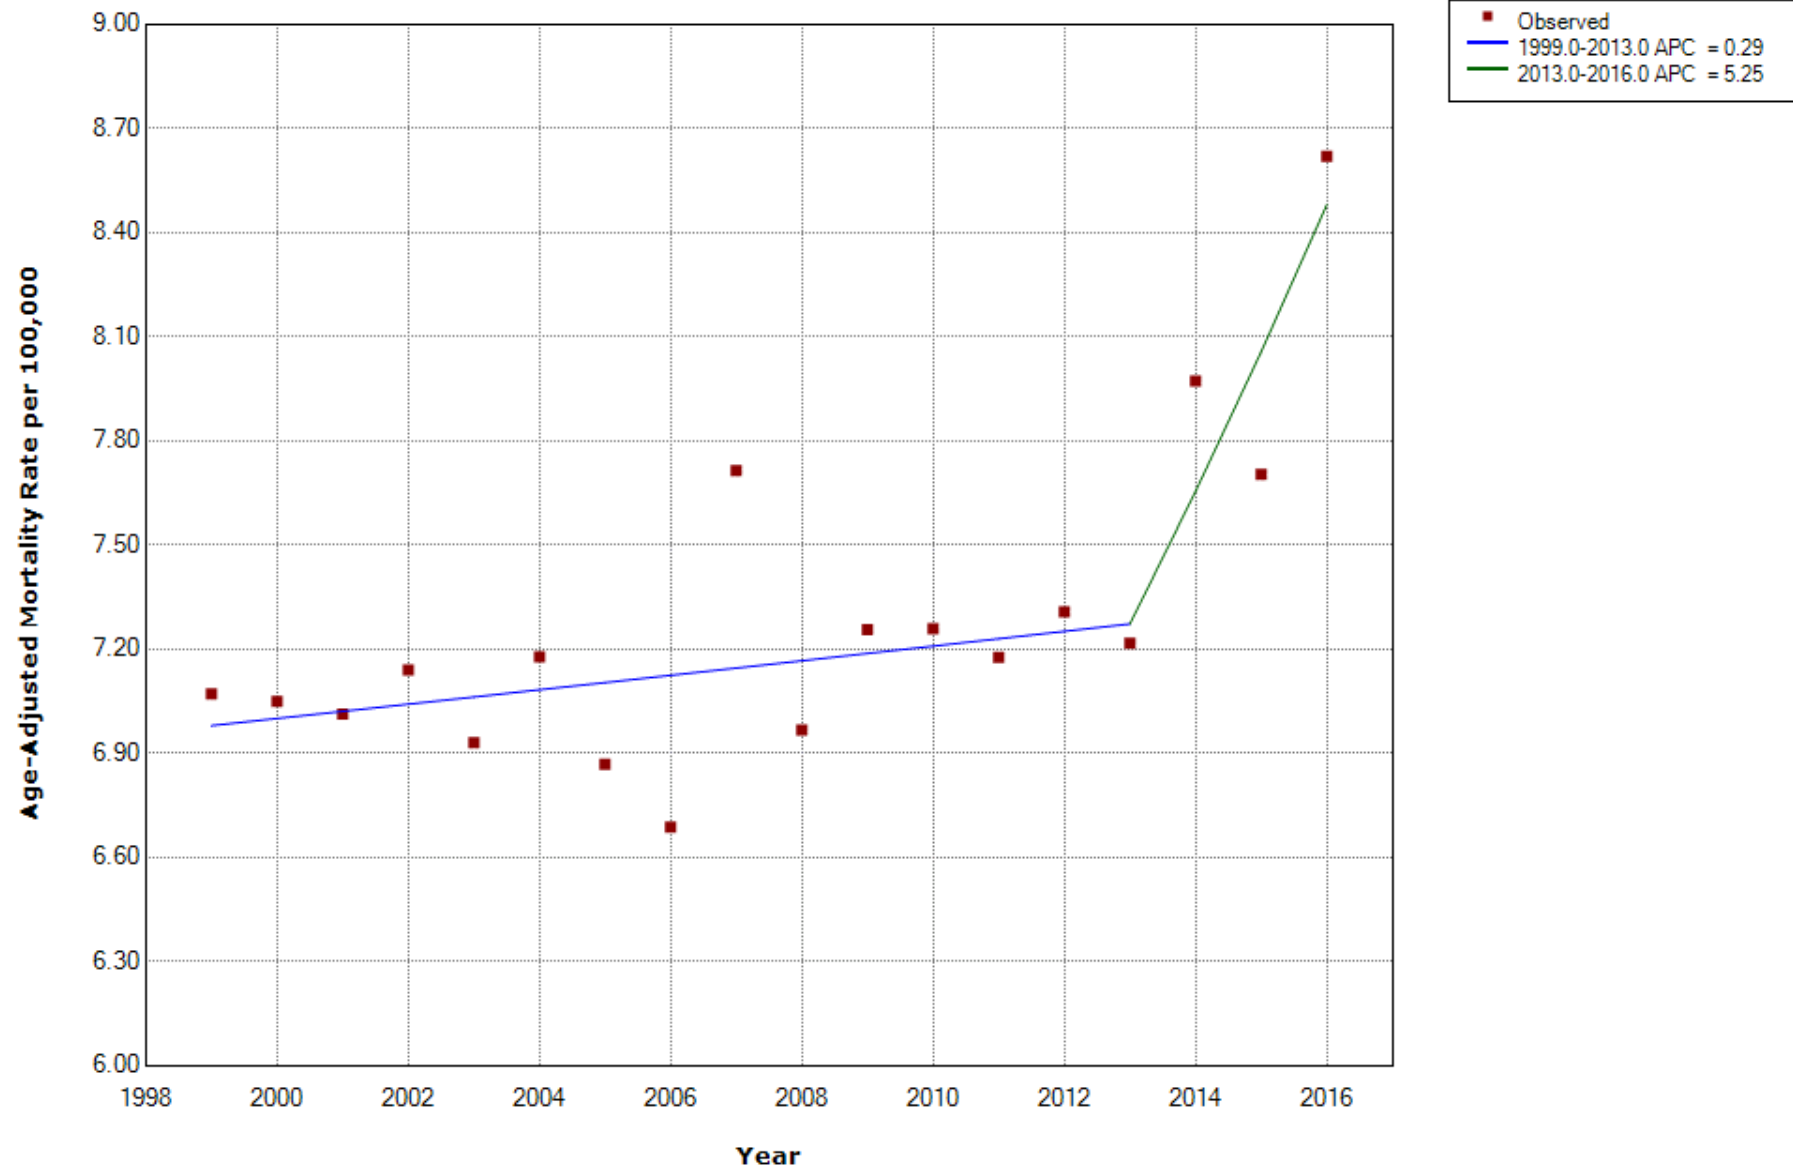

^ Indicates that the Annual Percent Change (APC) is significantly different from zero at the alpha = 0.05 level.  
Final Selected Model: 1 Joinpoint.

### Homicide (X85-Y09) / NH AIAN: 0 Joinpoints

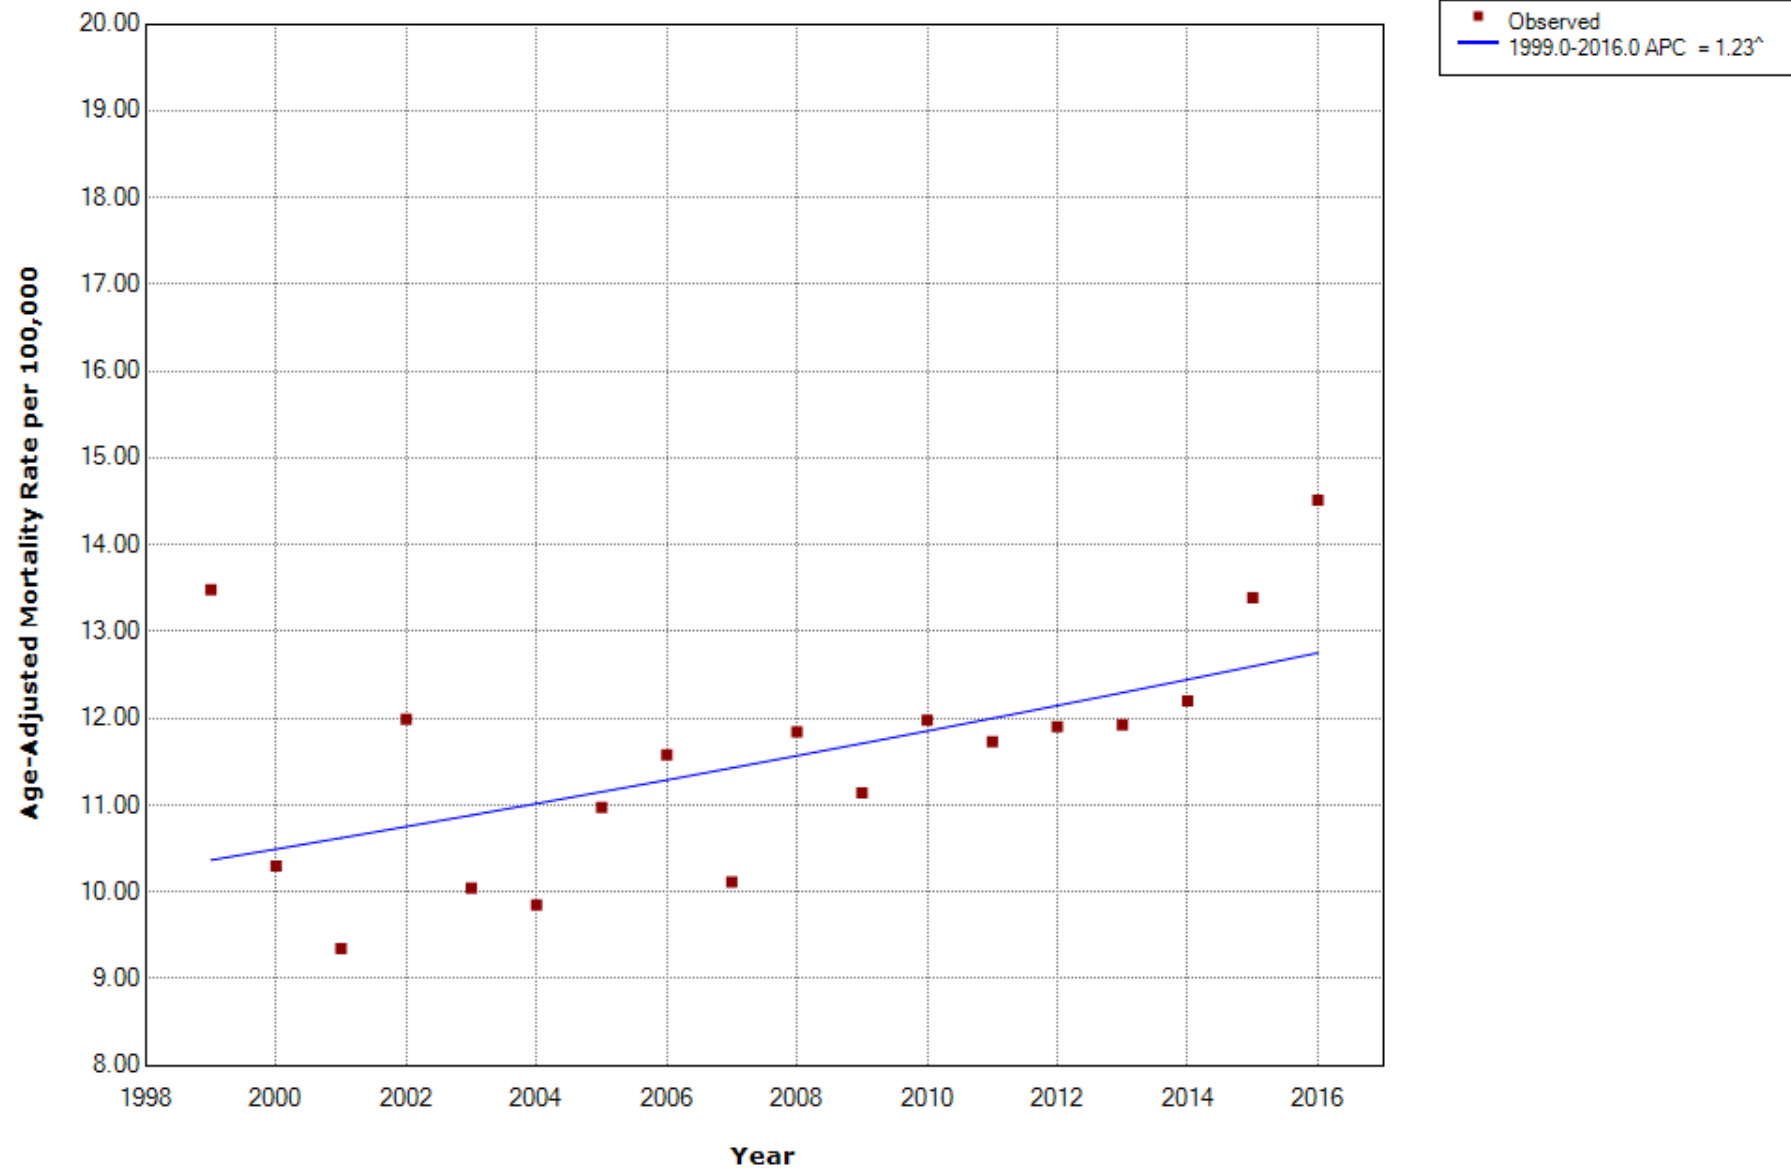

^ Indicates that the Annual Percent Change (APC) is significantly different from zero at the alpha = 0.05 level.  
Final Selected Model: 0 Joinpoints.

### Homicide (X85-Y09) / NH API: 0 Joinpoints

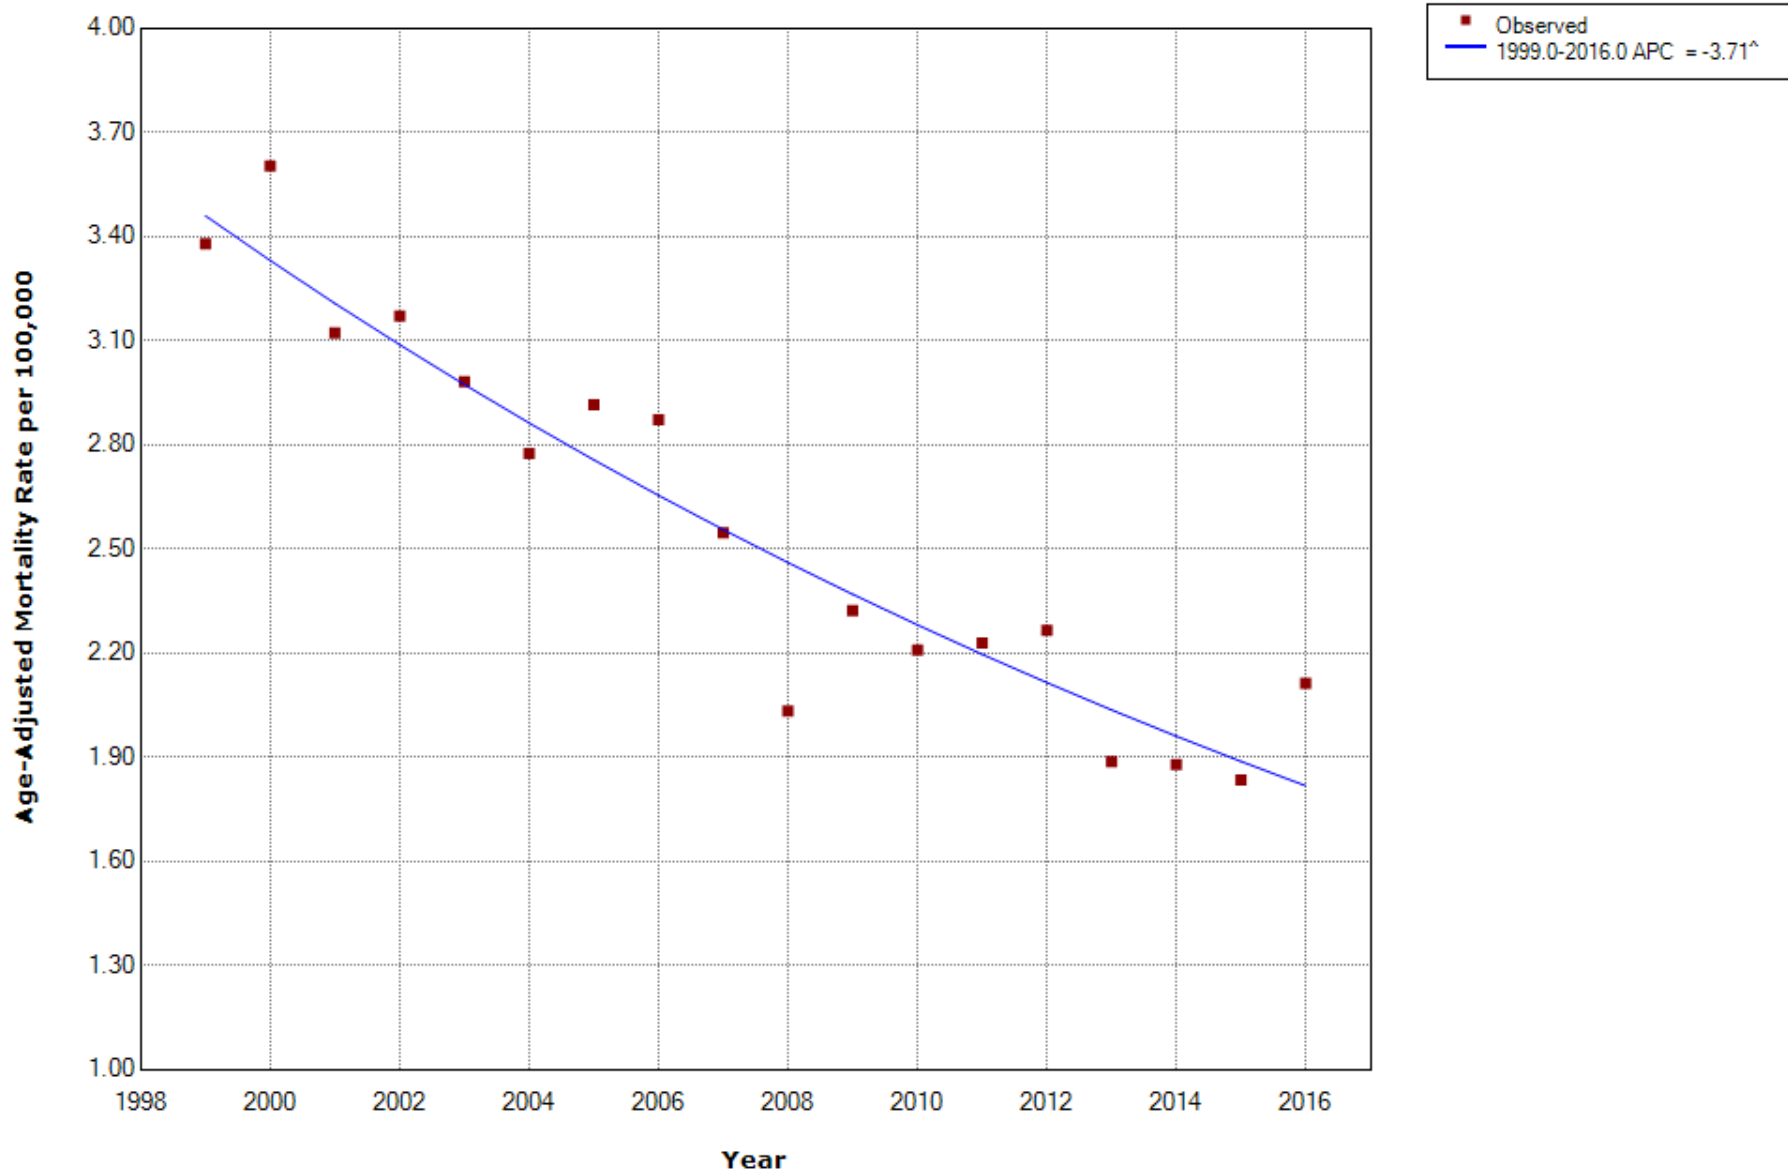

^ Indicates that the Annual Percent Change (APC) is significantly different from zero at the alpha = 0.05 level.  
Final Selected Model: 0 Joinpoints.



### Homicide (X85-Y09) / NH Blacks: 3 Joinpoints

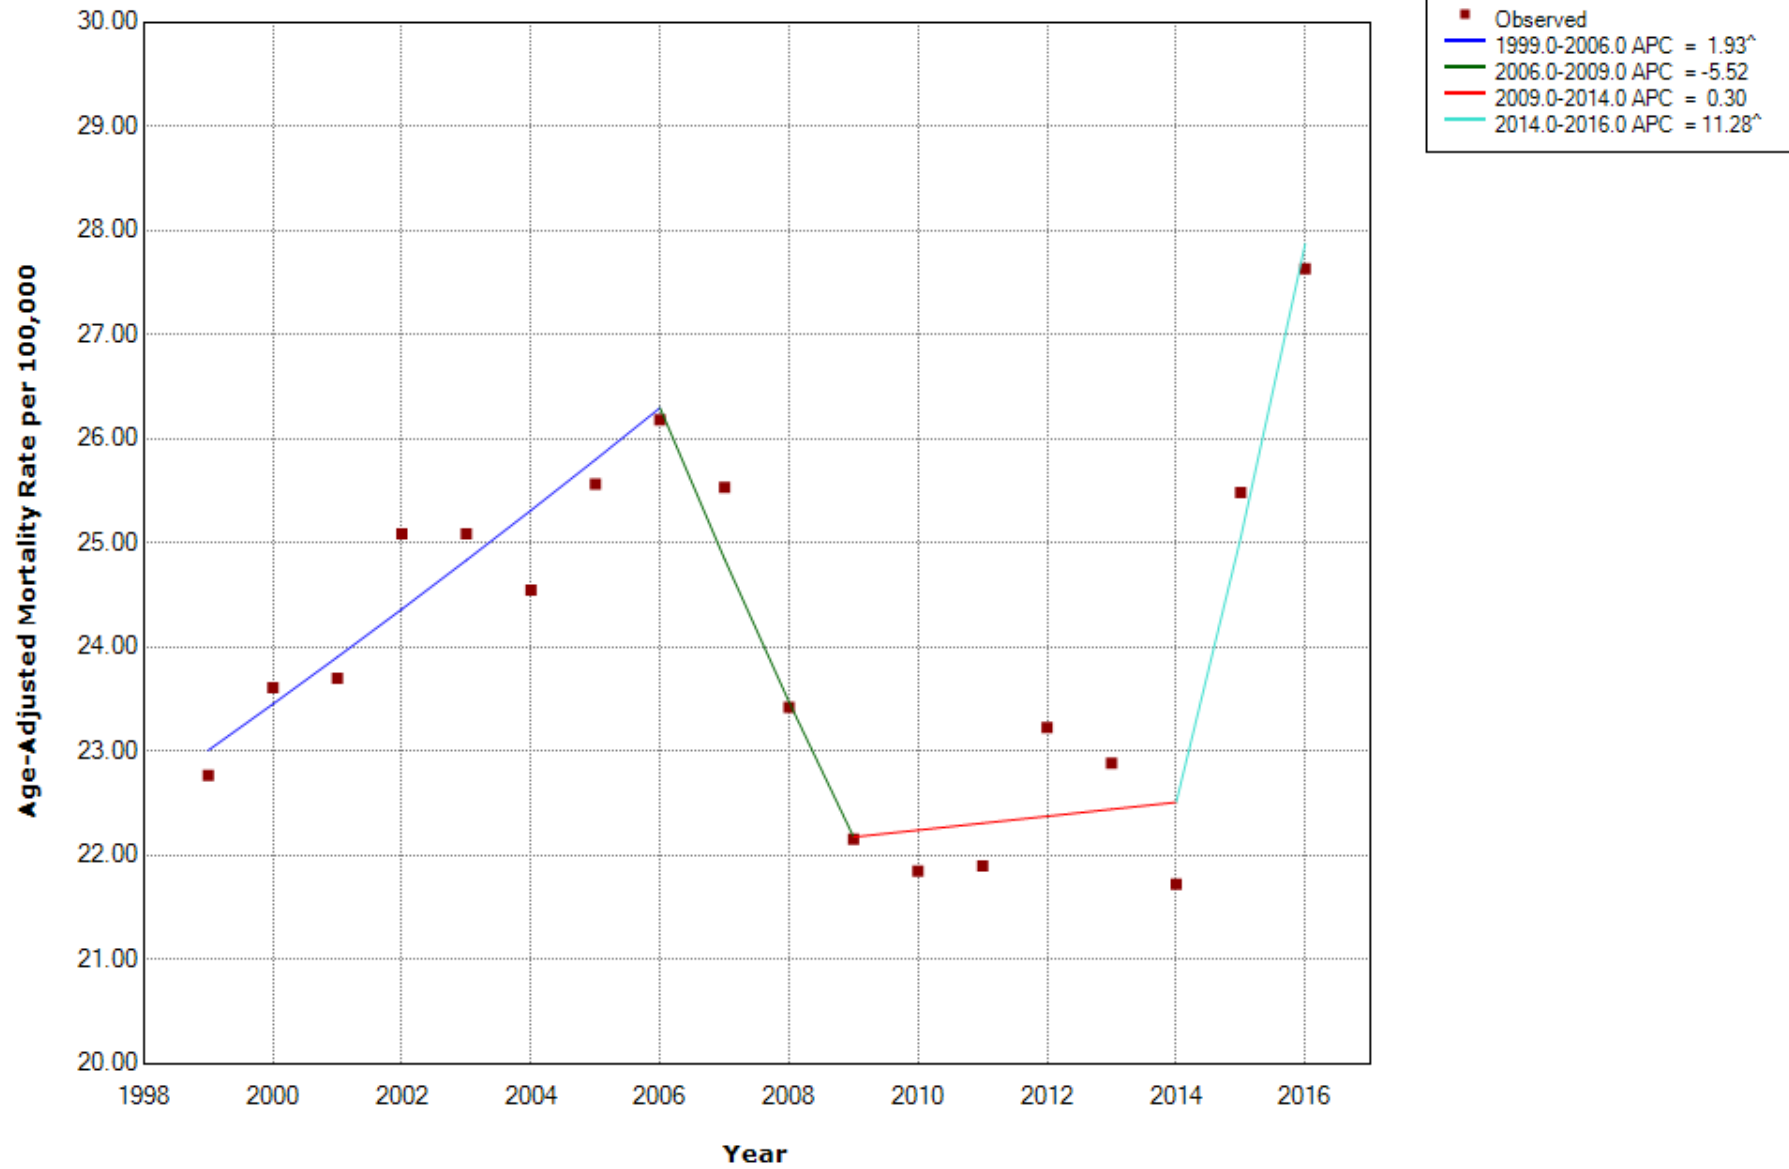

^ Indicates that the Annual Percent Change (APC) is significantly different from zero at the alpha = 0.05 level.  
Final Selected Model: 3 Joinpoints.

### Homicide (X85-Y09) / NH whites: 1 Joinpoint

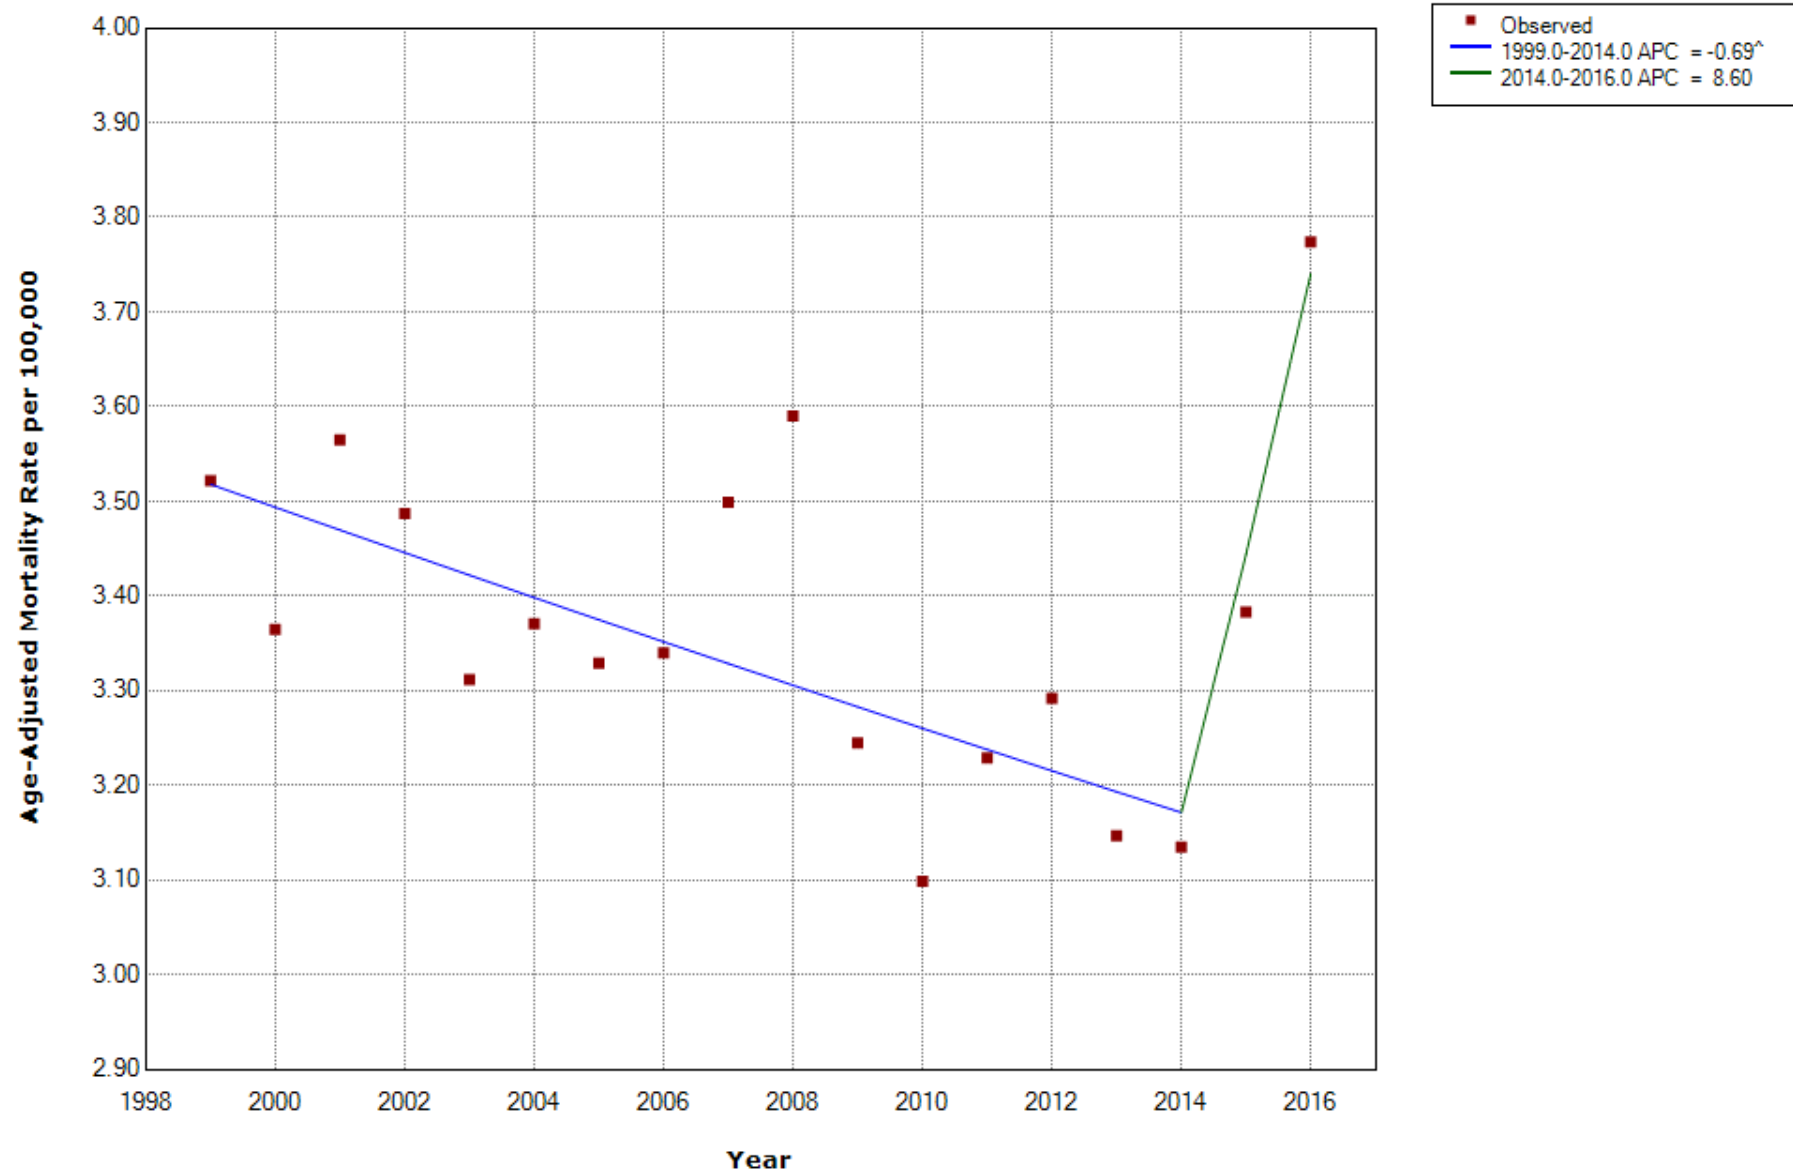

^ Indicates that the Annual Percent Change (APC) is significantly different from zero at the alpha = 0.05 level.  
Final Selected Model: 1 Joinpoint.

### Homicide (X85-Y09) / Hispanics: 2 Joinpoints

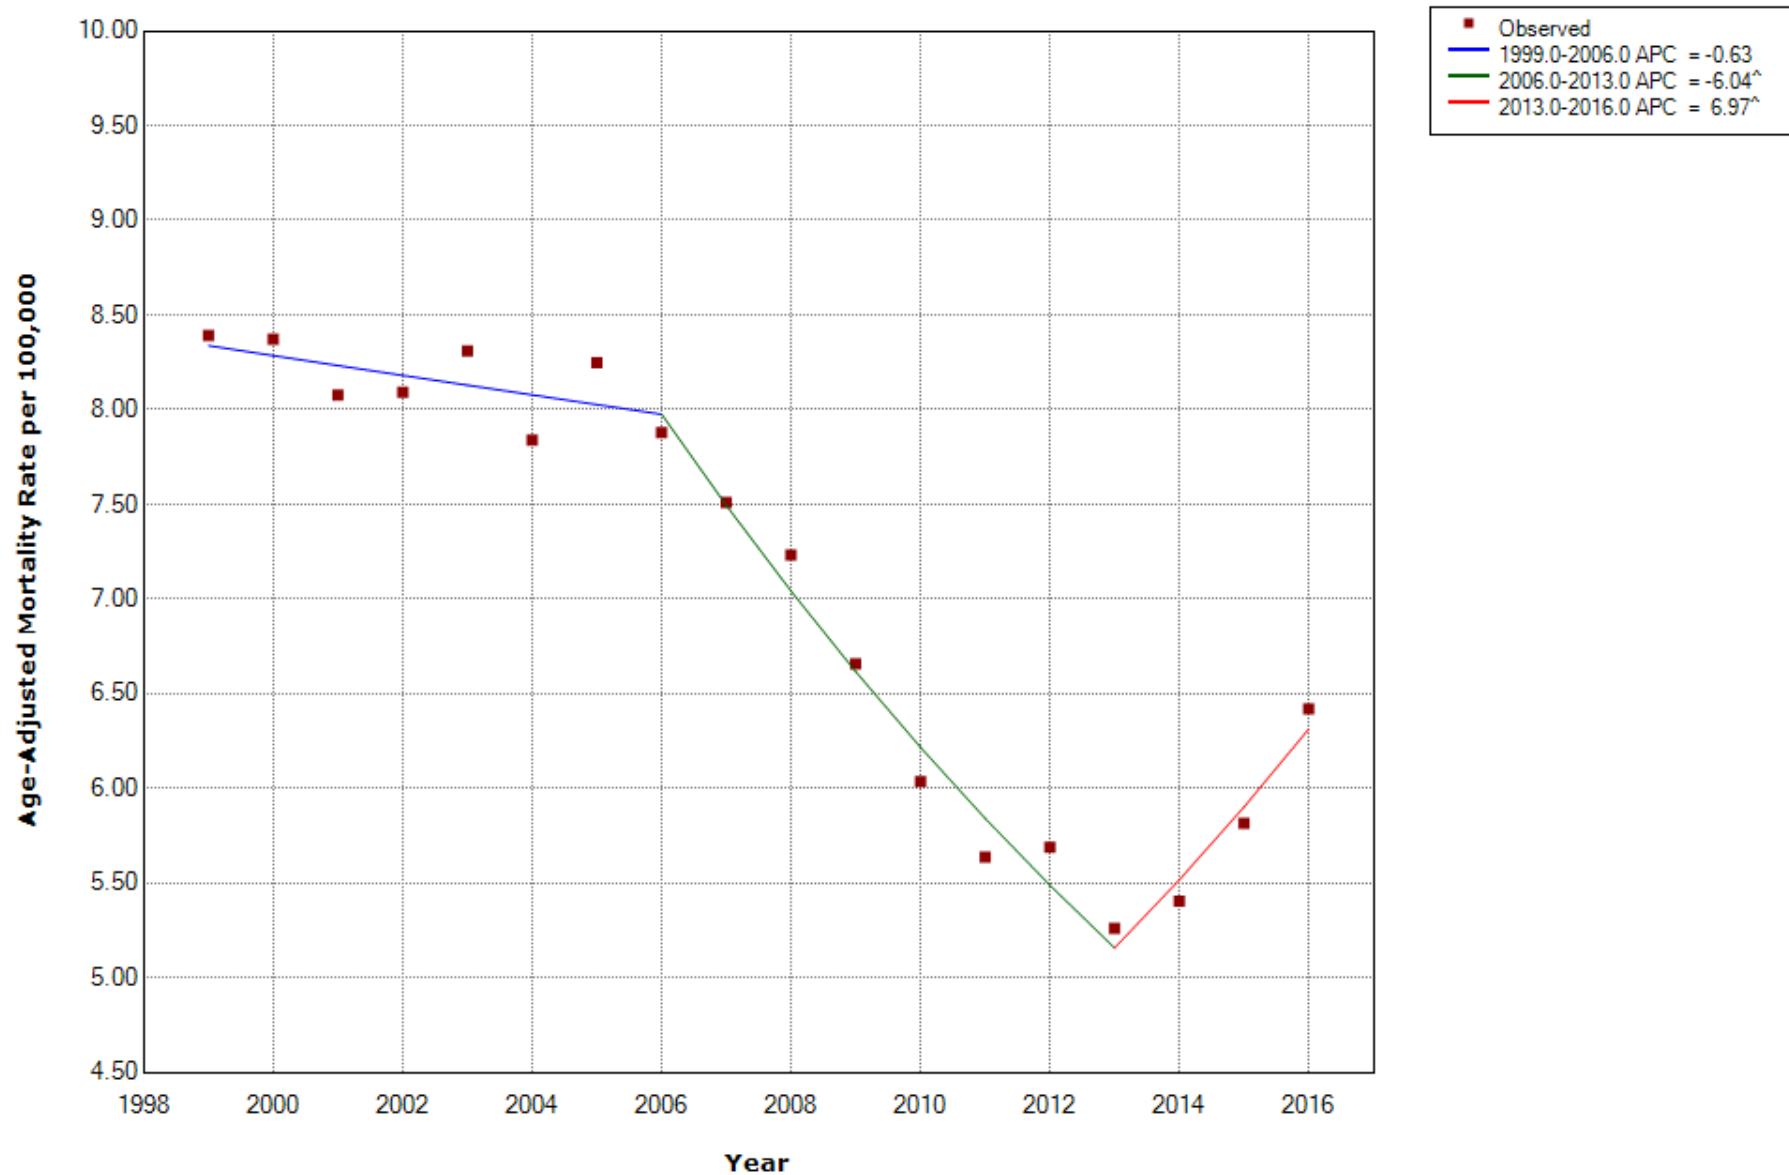

<sup>^</sup> Indicates that the Annual Percent Change (APC) is significantly different from zero at the alpha = 0.05 level.  
Final Selected Model: 2 Joinpoints.

Accidental falls, drowning, fire (W00-W19, W65-W74, X00-X09) / NH AIAN: 1 Joinpoint

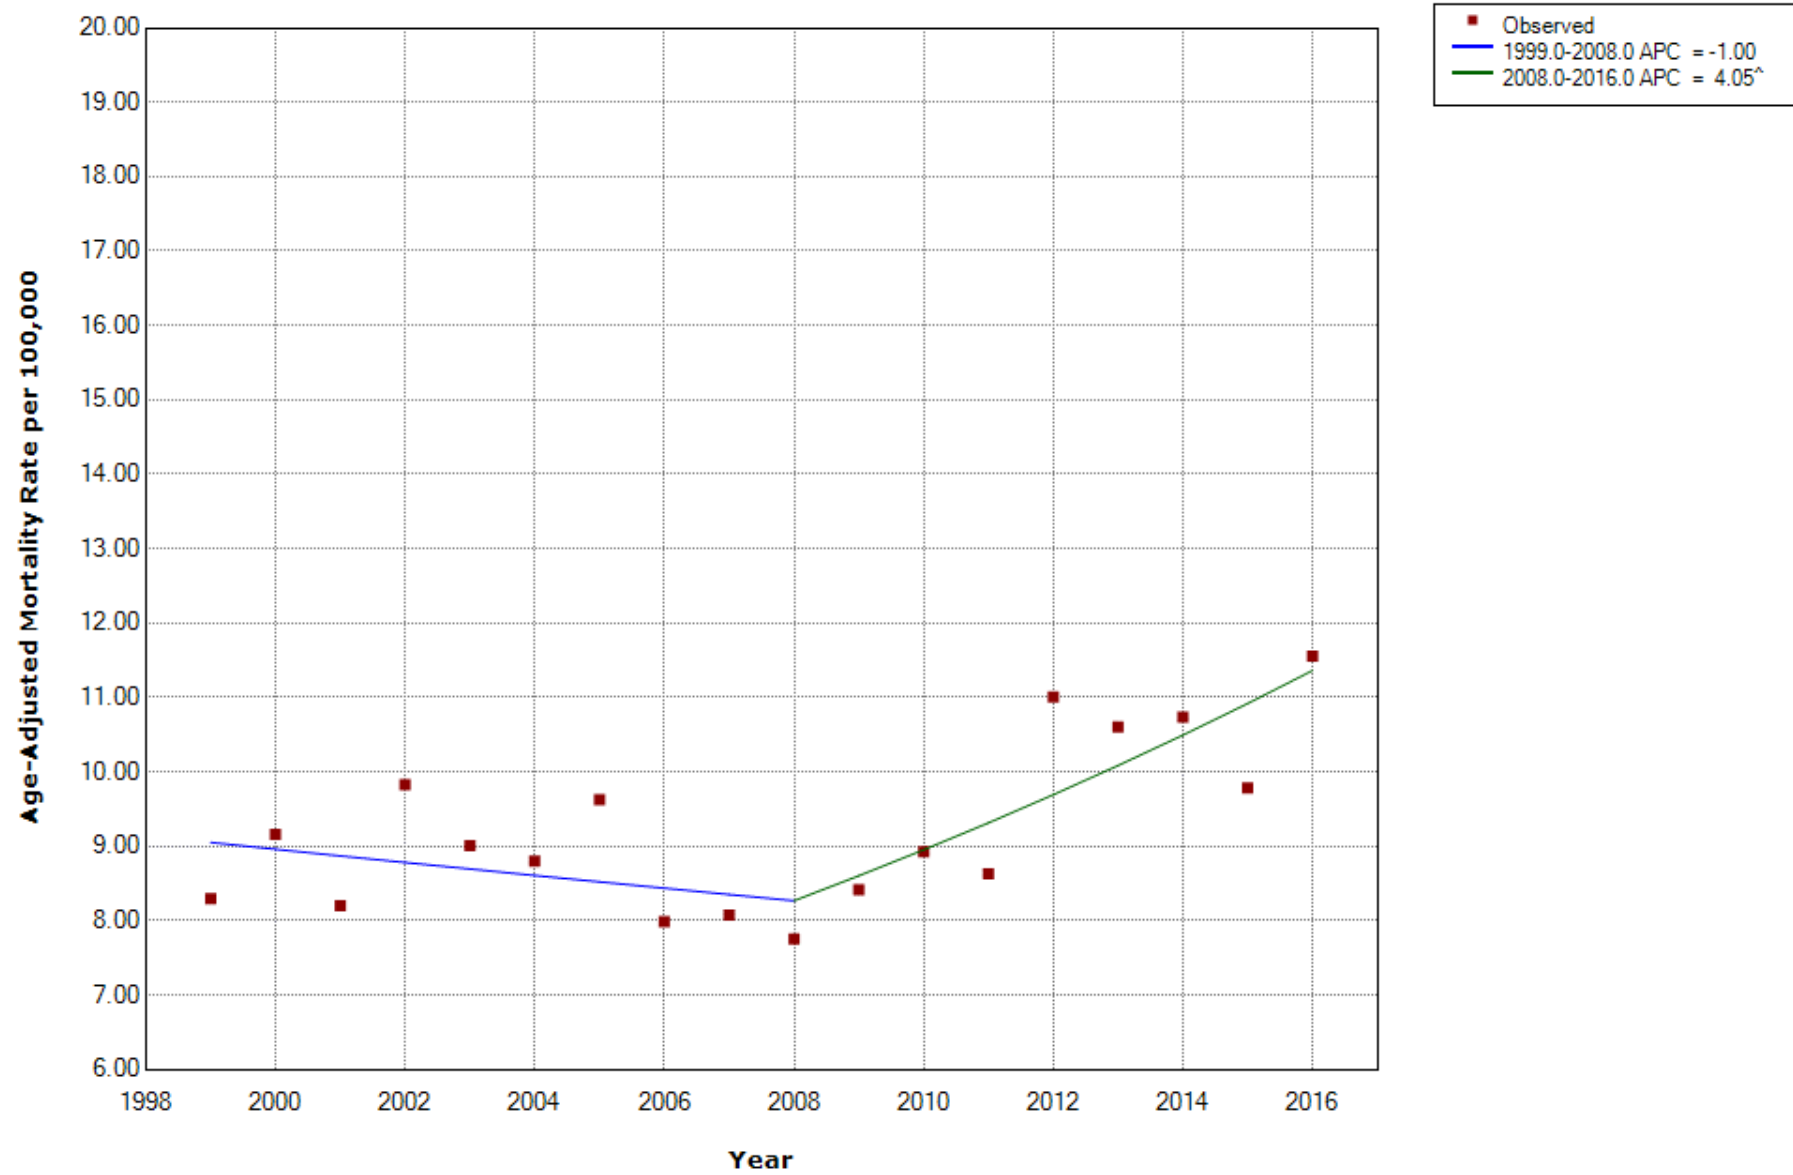

^ Indicates that the Annual Percent Change (APC) is significantly different from zero at the alpha = 0.05 level.  
Final Selected Model: 1 Joinpoint.

Accidental falls, drowning, fire (W00-W19, W65-W74, X00-X09) / NH API: 0 Joinpoints

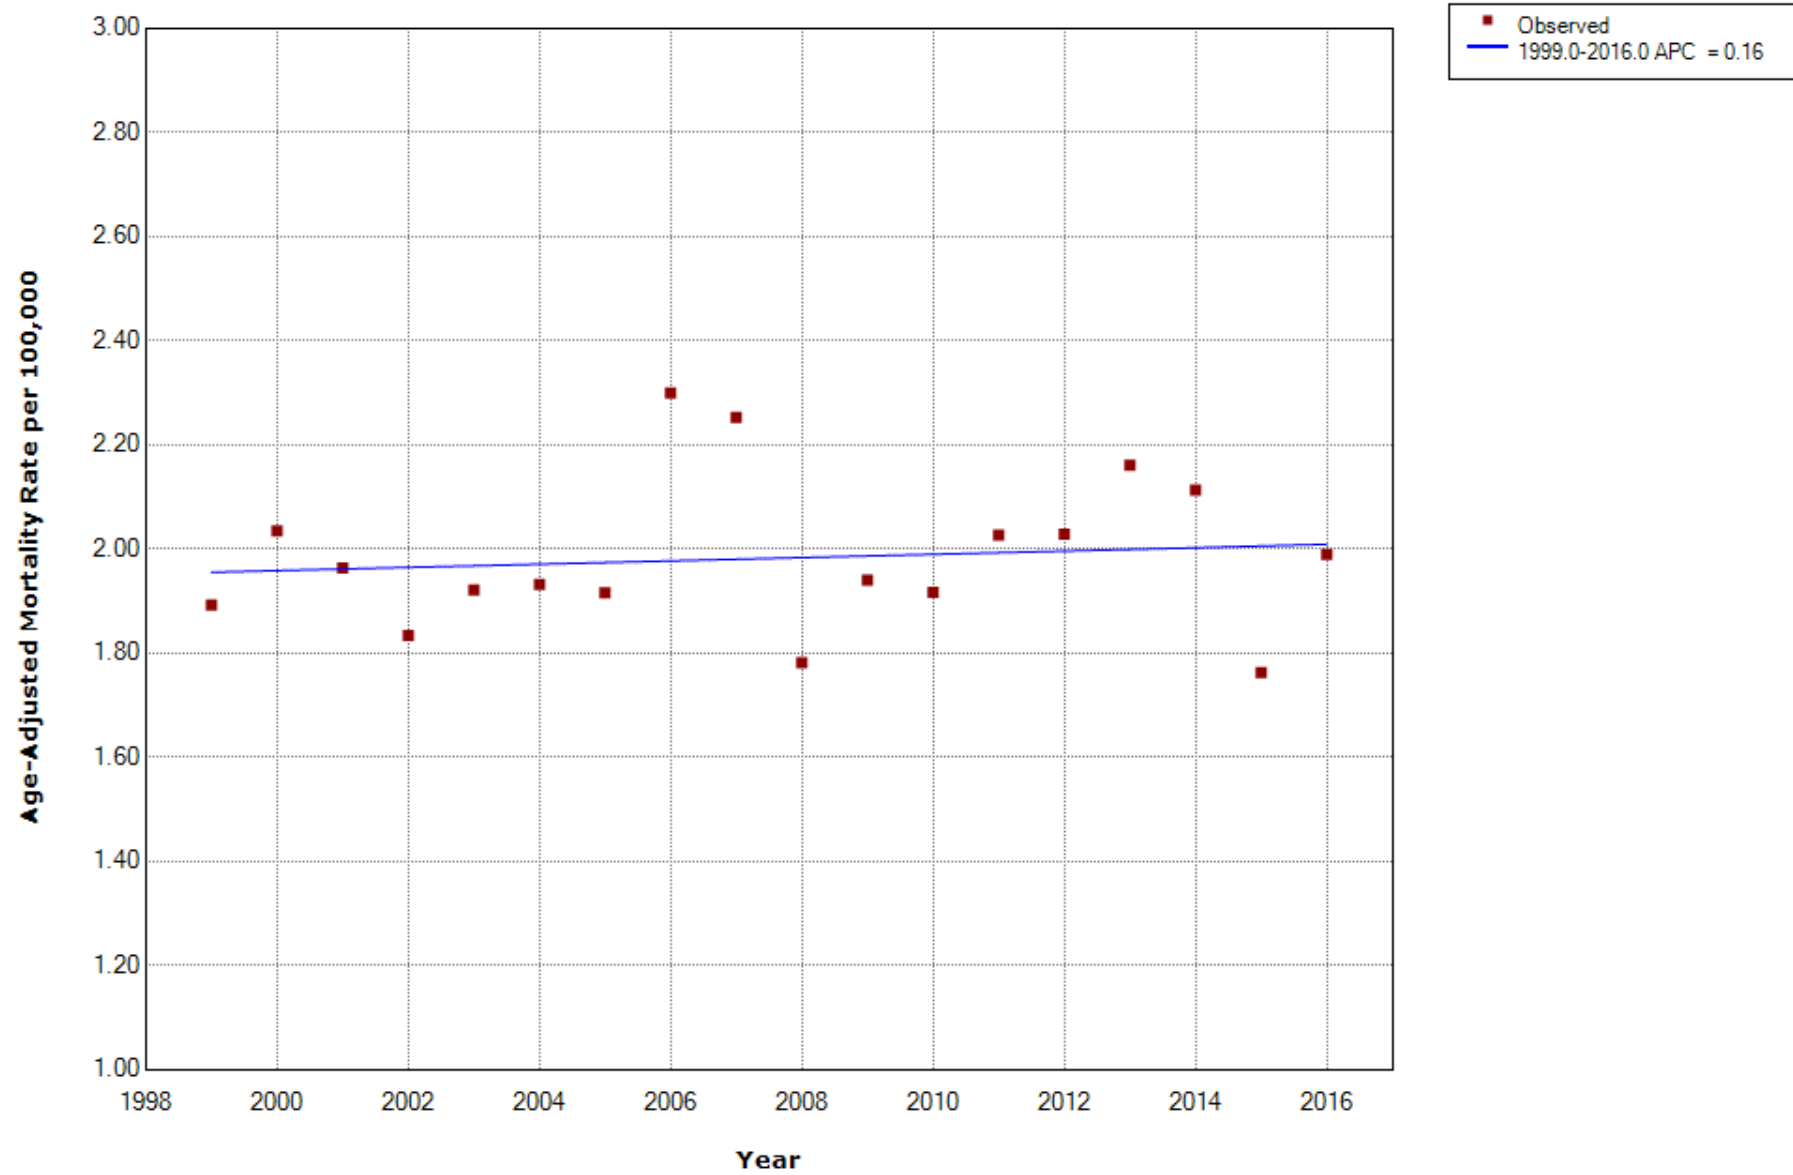

^ Indicates that the Annual Percent Change (APC) is significantly different from zero at the alpha = 0.05 level.  
Final Selected Model: 0 Joinpoints.

Accidental falls, drowning, fire (W00-W19, W65-W74, X00-X09) / NH Blacks: 0 Joinpoints

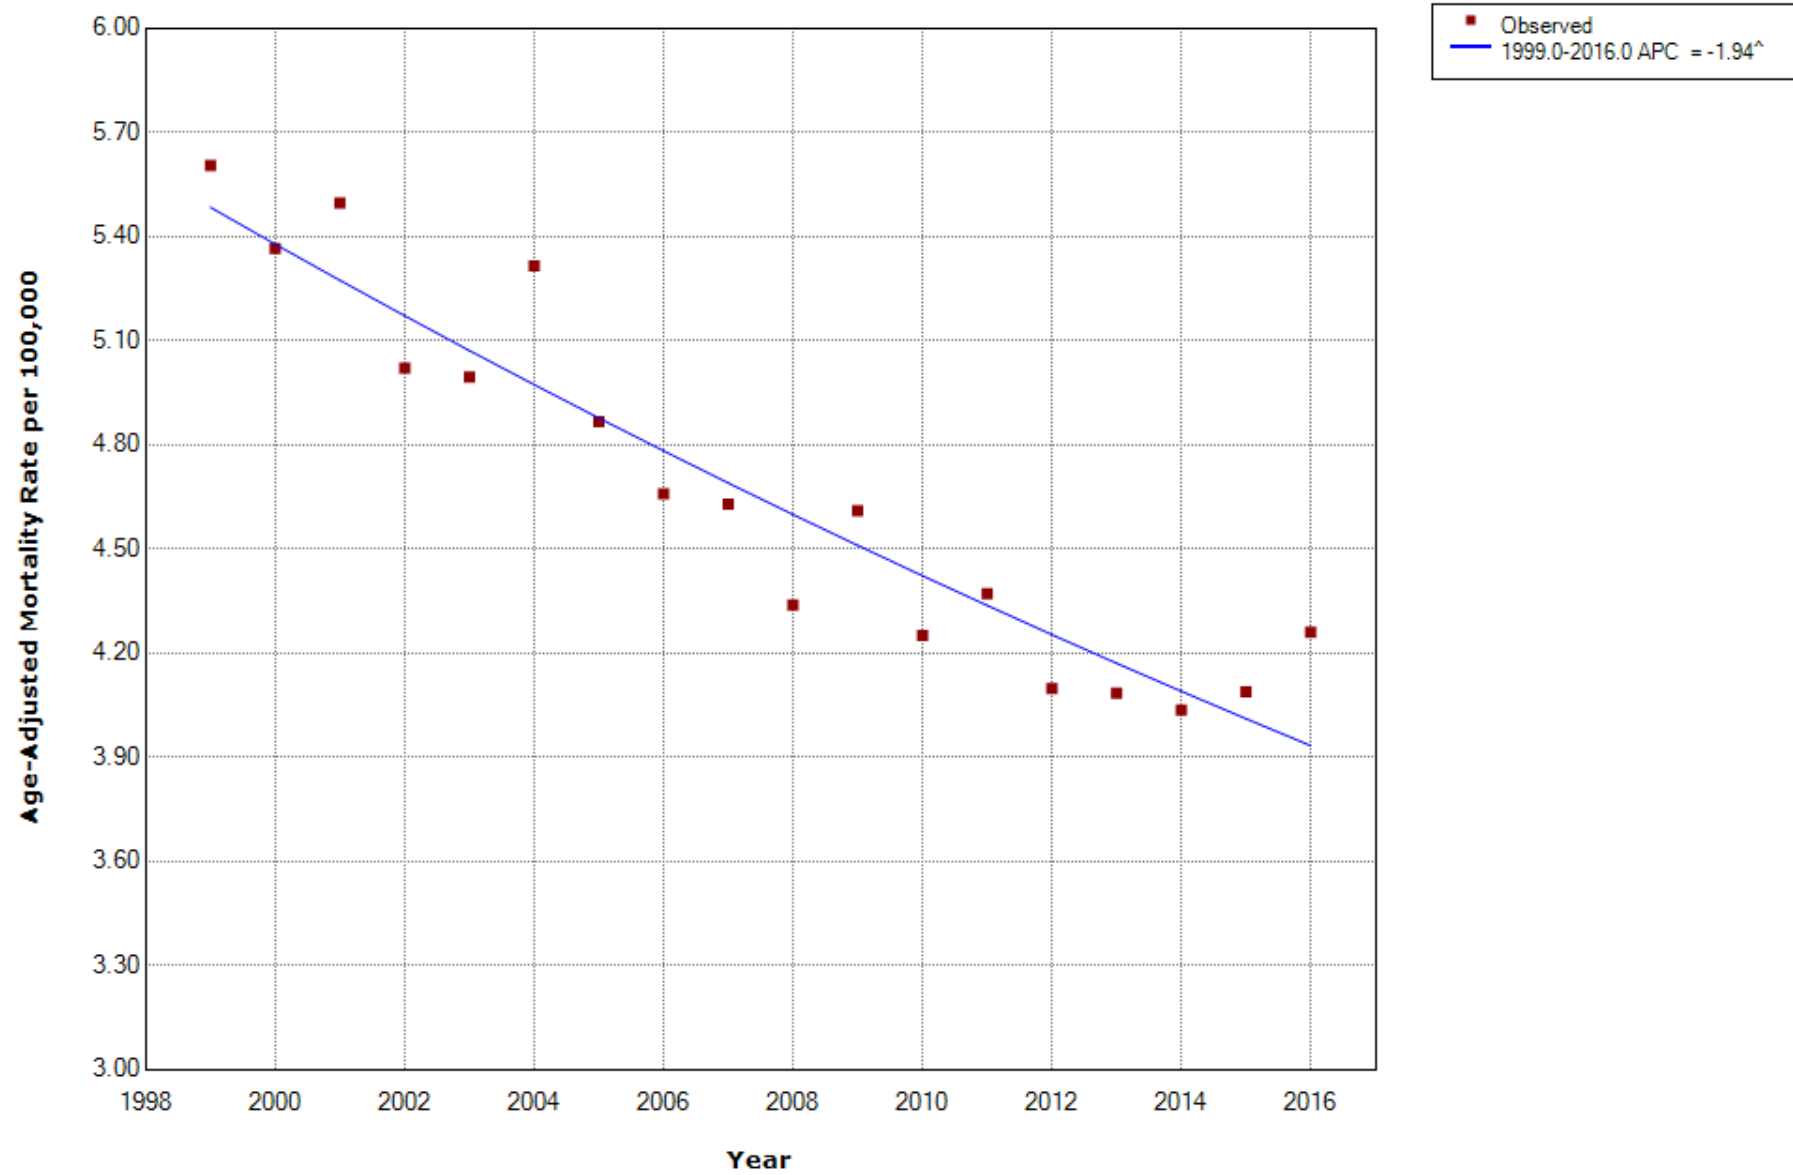

^ Indicates that the Annual Percent Change (APC) is significantly different from zero at the alpha = 0.05 level.  
Final Selected Model: 0 Joinpoints.

Accidental falls, drowning, fire (W00-W19, W65-W74, X00-X09) / NH whites: 1 Joinpoint

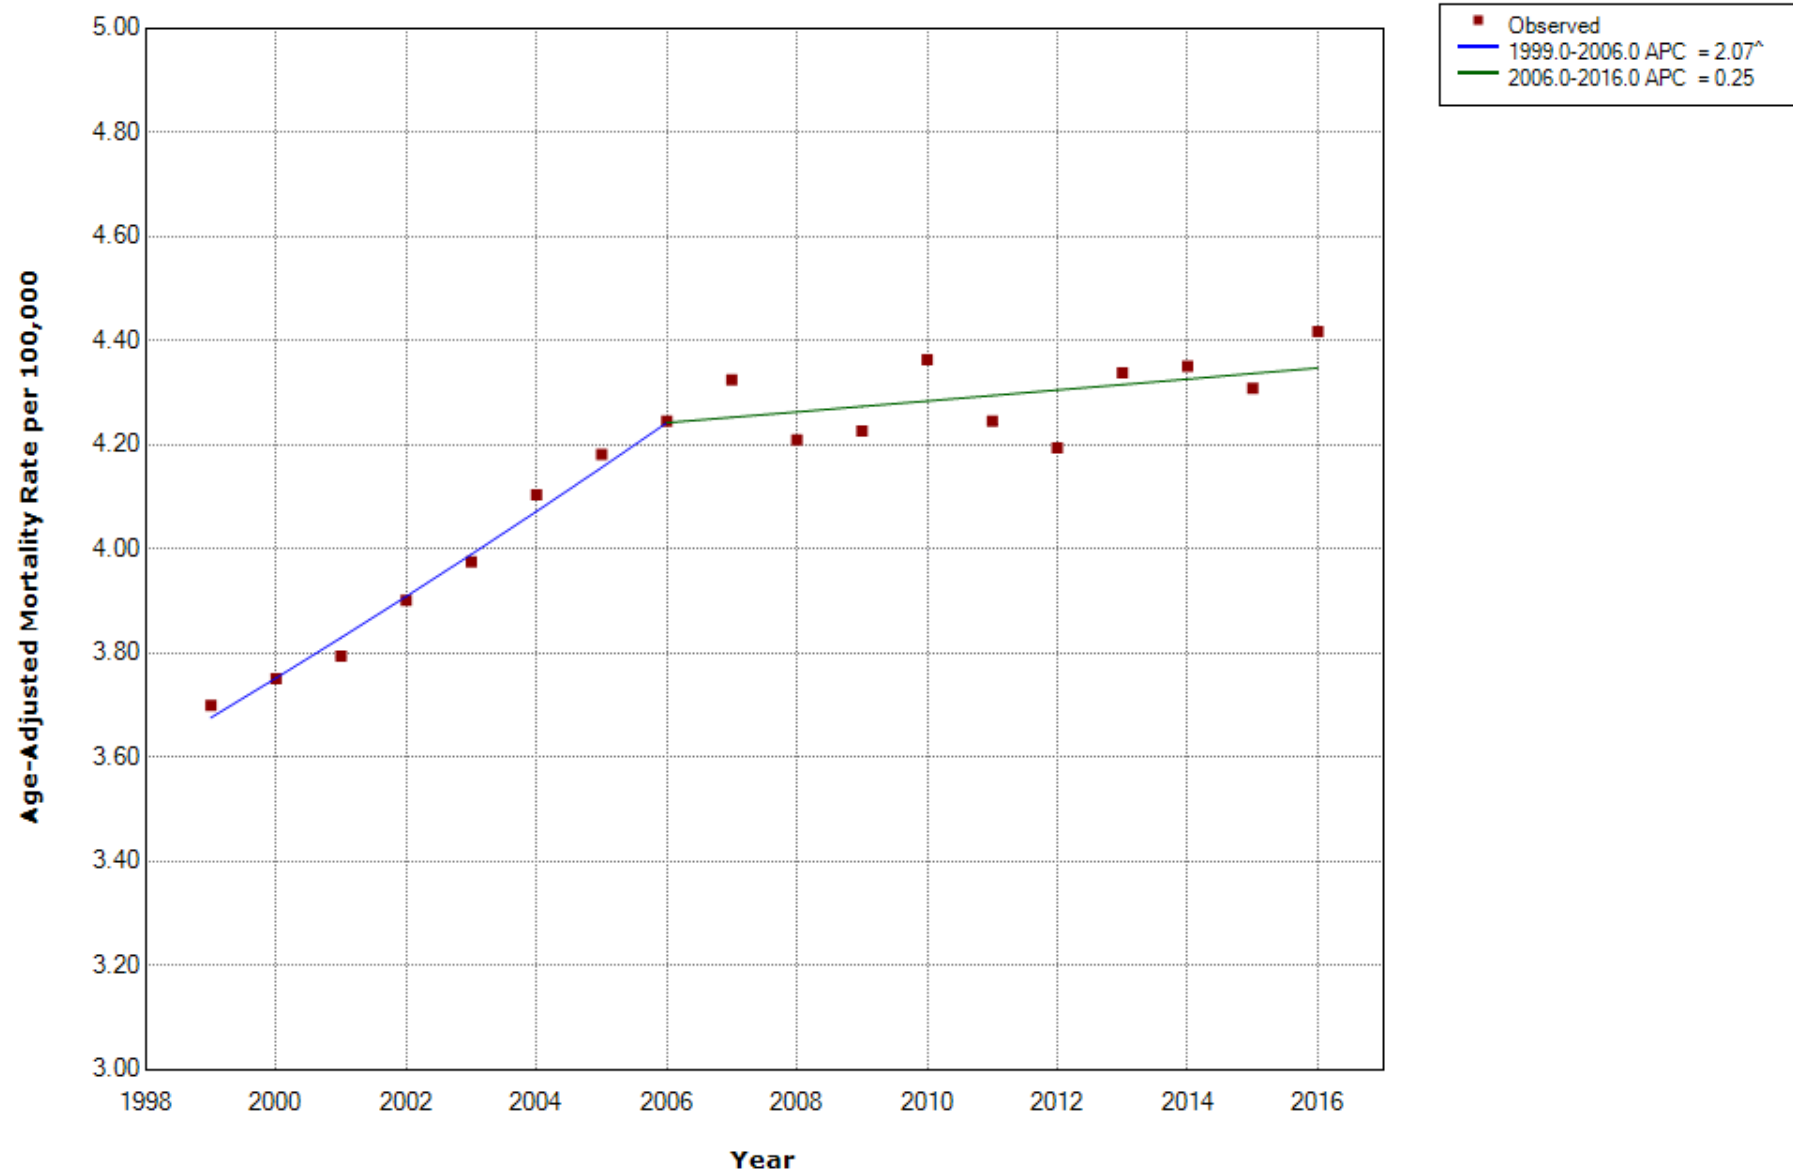

^ Indicates that the Annual Percent Change (APC) is significantly different from zero at the alpha = 0.05 level.  
Final Selected Model: 1 Joinpoint.

Accidental falls, drowning, fire (W00-W19, W65-W74, X00-X09) / Hispanics: 1 Joinpoint

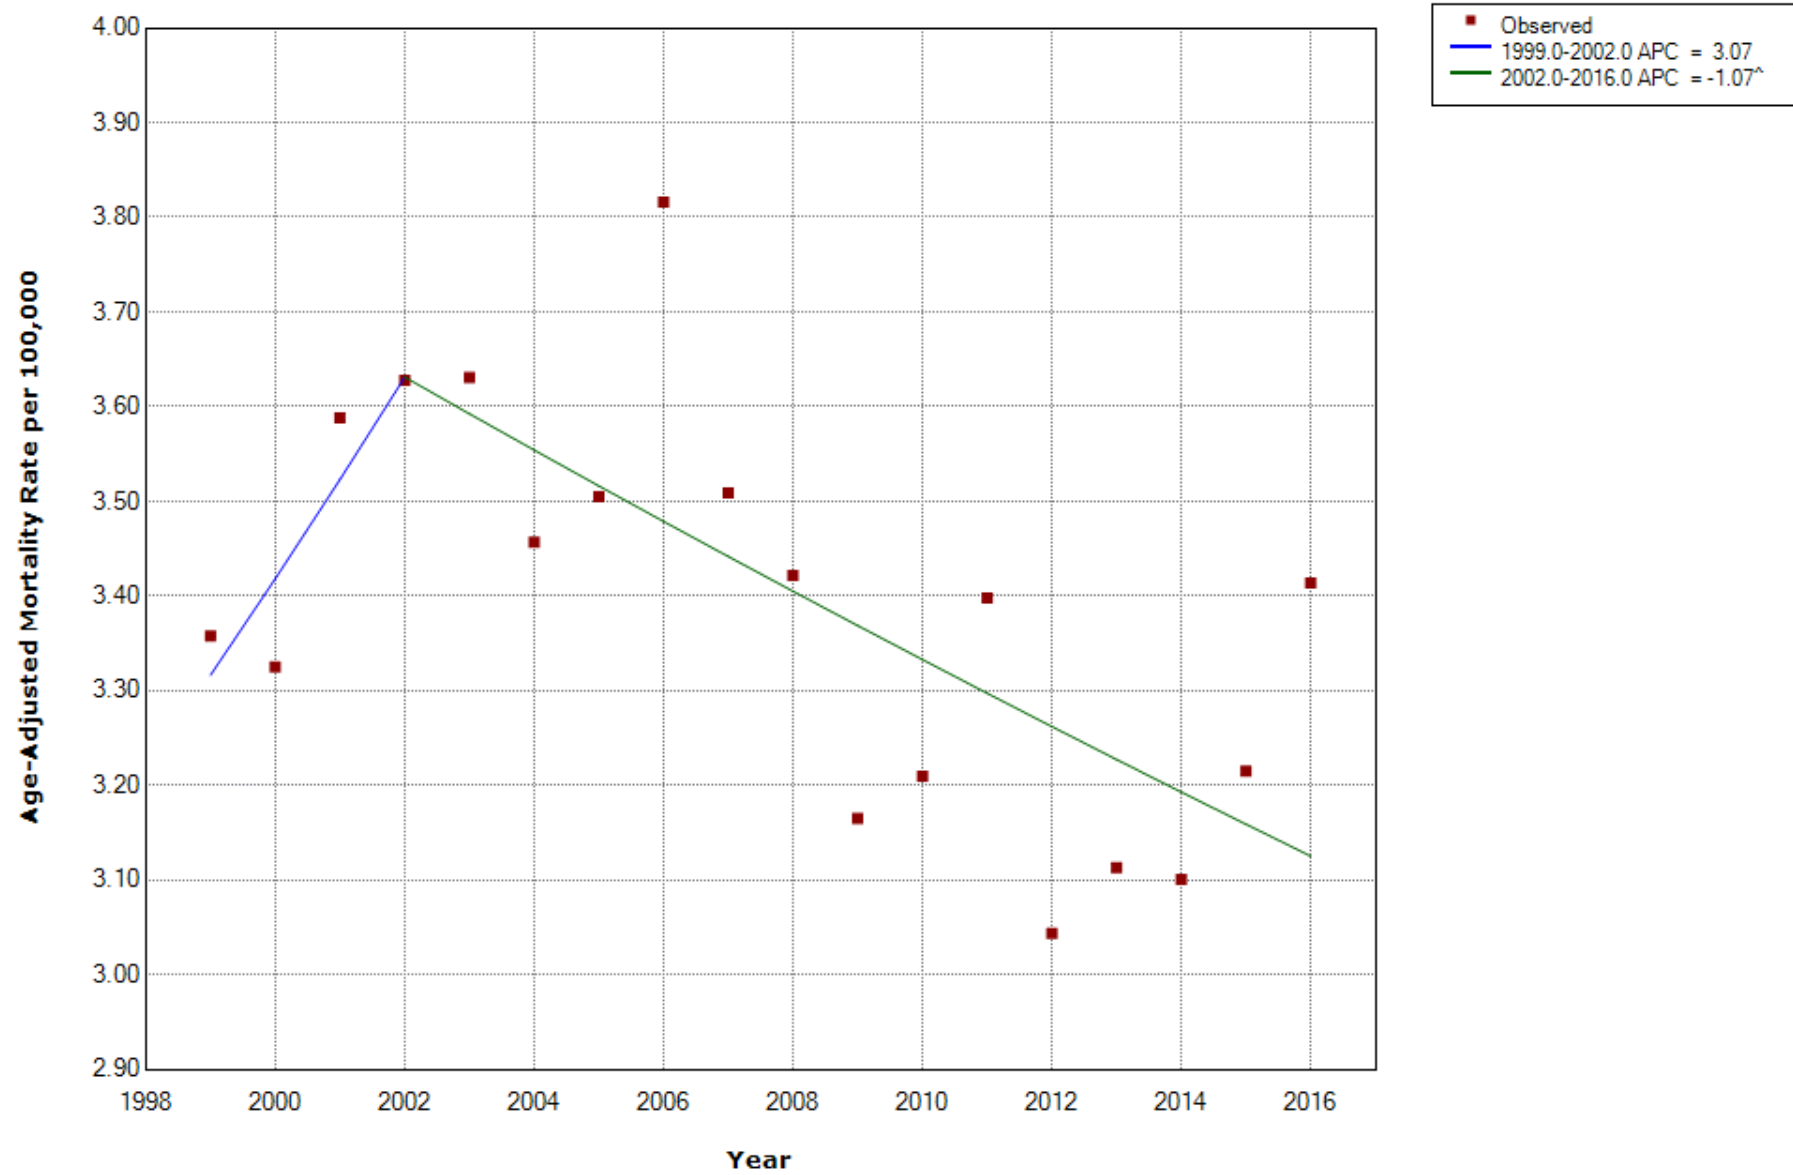

^ Indicates that the Annual Percent Change (APC) is significantly different from zero at the alpha = 0.05 level.  
Final Selected Model: 1 Joinpoint.



### Pedestrian, cyclist, and motorcycle injury in transport accident (V01-V29) / NH AIAN: Observed

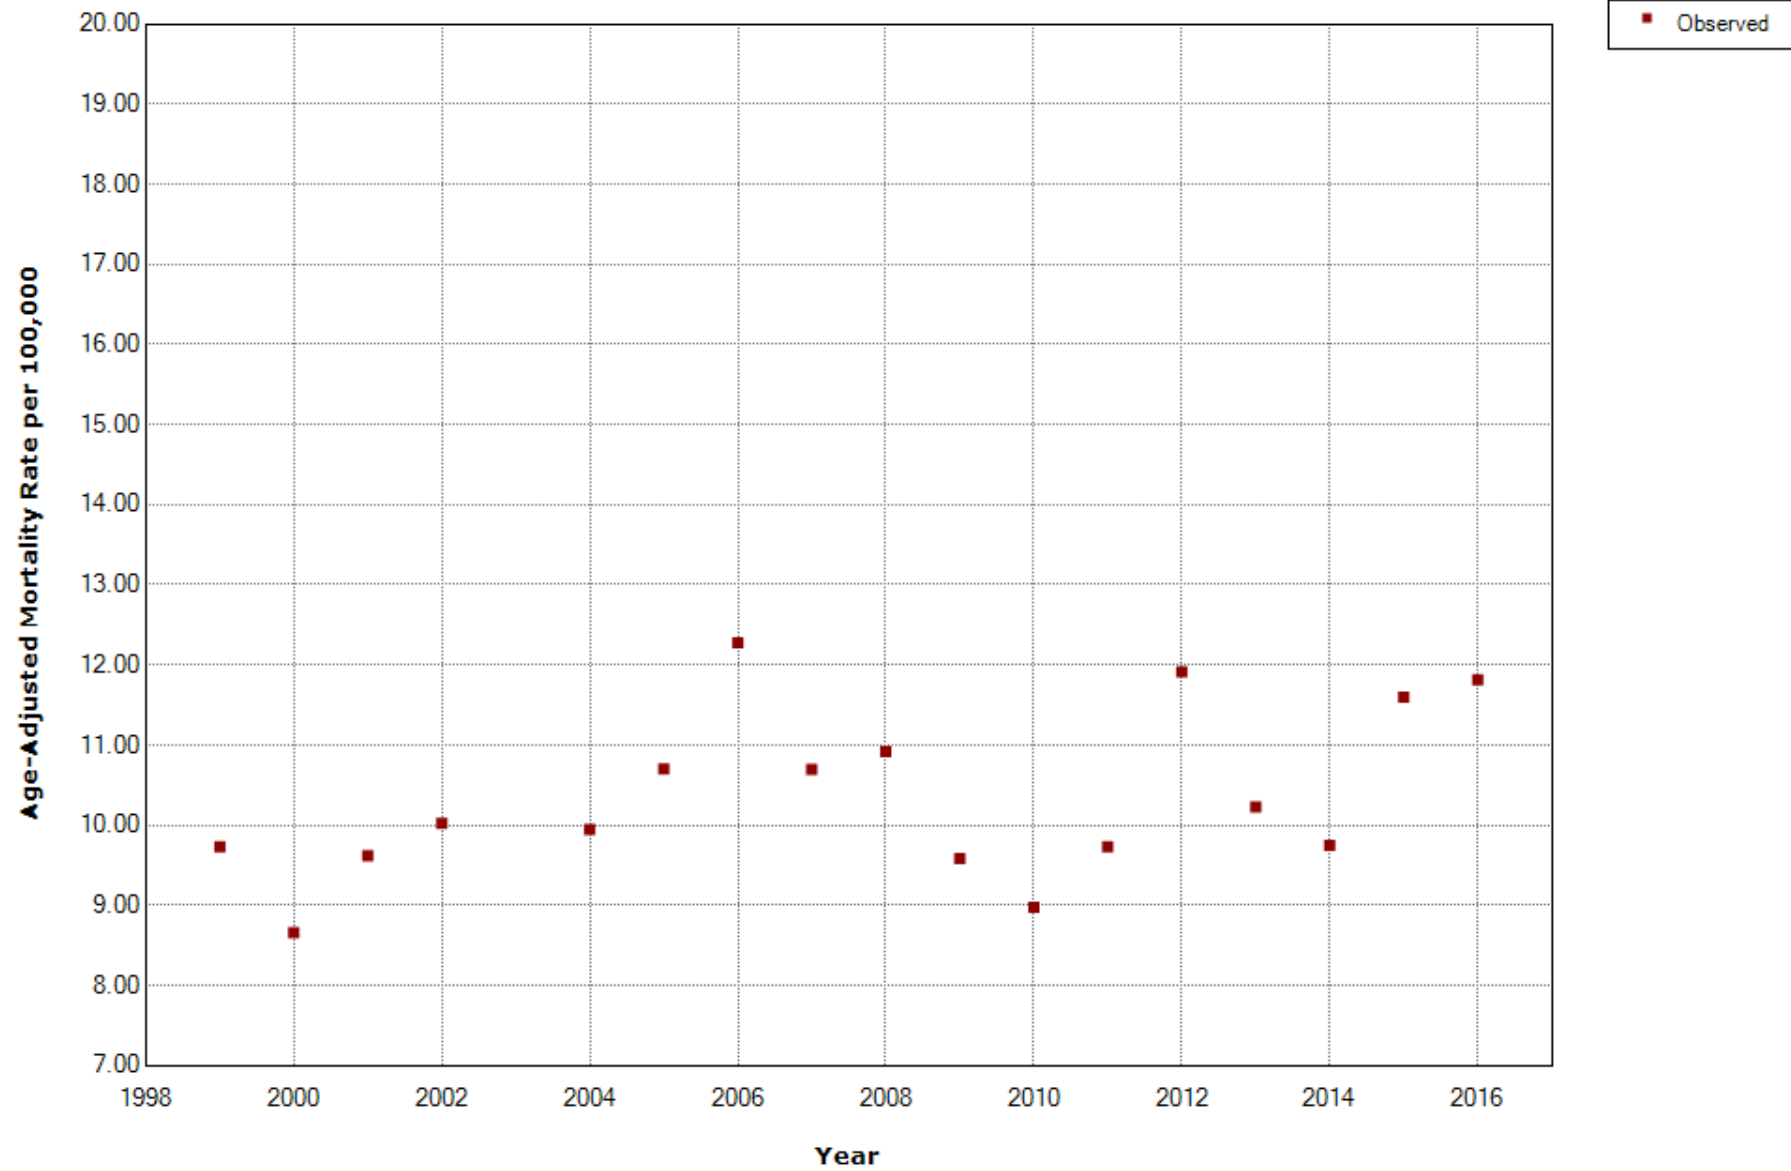

^ Indicates that the Annual Percent Change (APC) is significantly different from zero at the alpha = 0.05 level.

\* Joinpoint cannot process records with missing dependent variable values. Joinpoint will not analyze by-groups that have this error. (Row = 454, Col = 1)

Pedestrian, cyclist, and motorcycle injury in transport accident (V01-V29) / NH whites: 2 Joinpoints

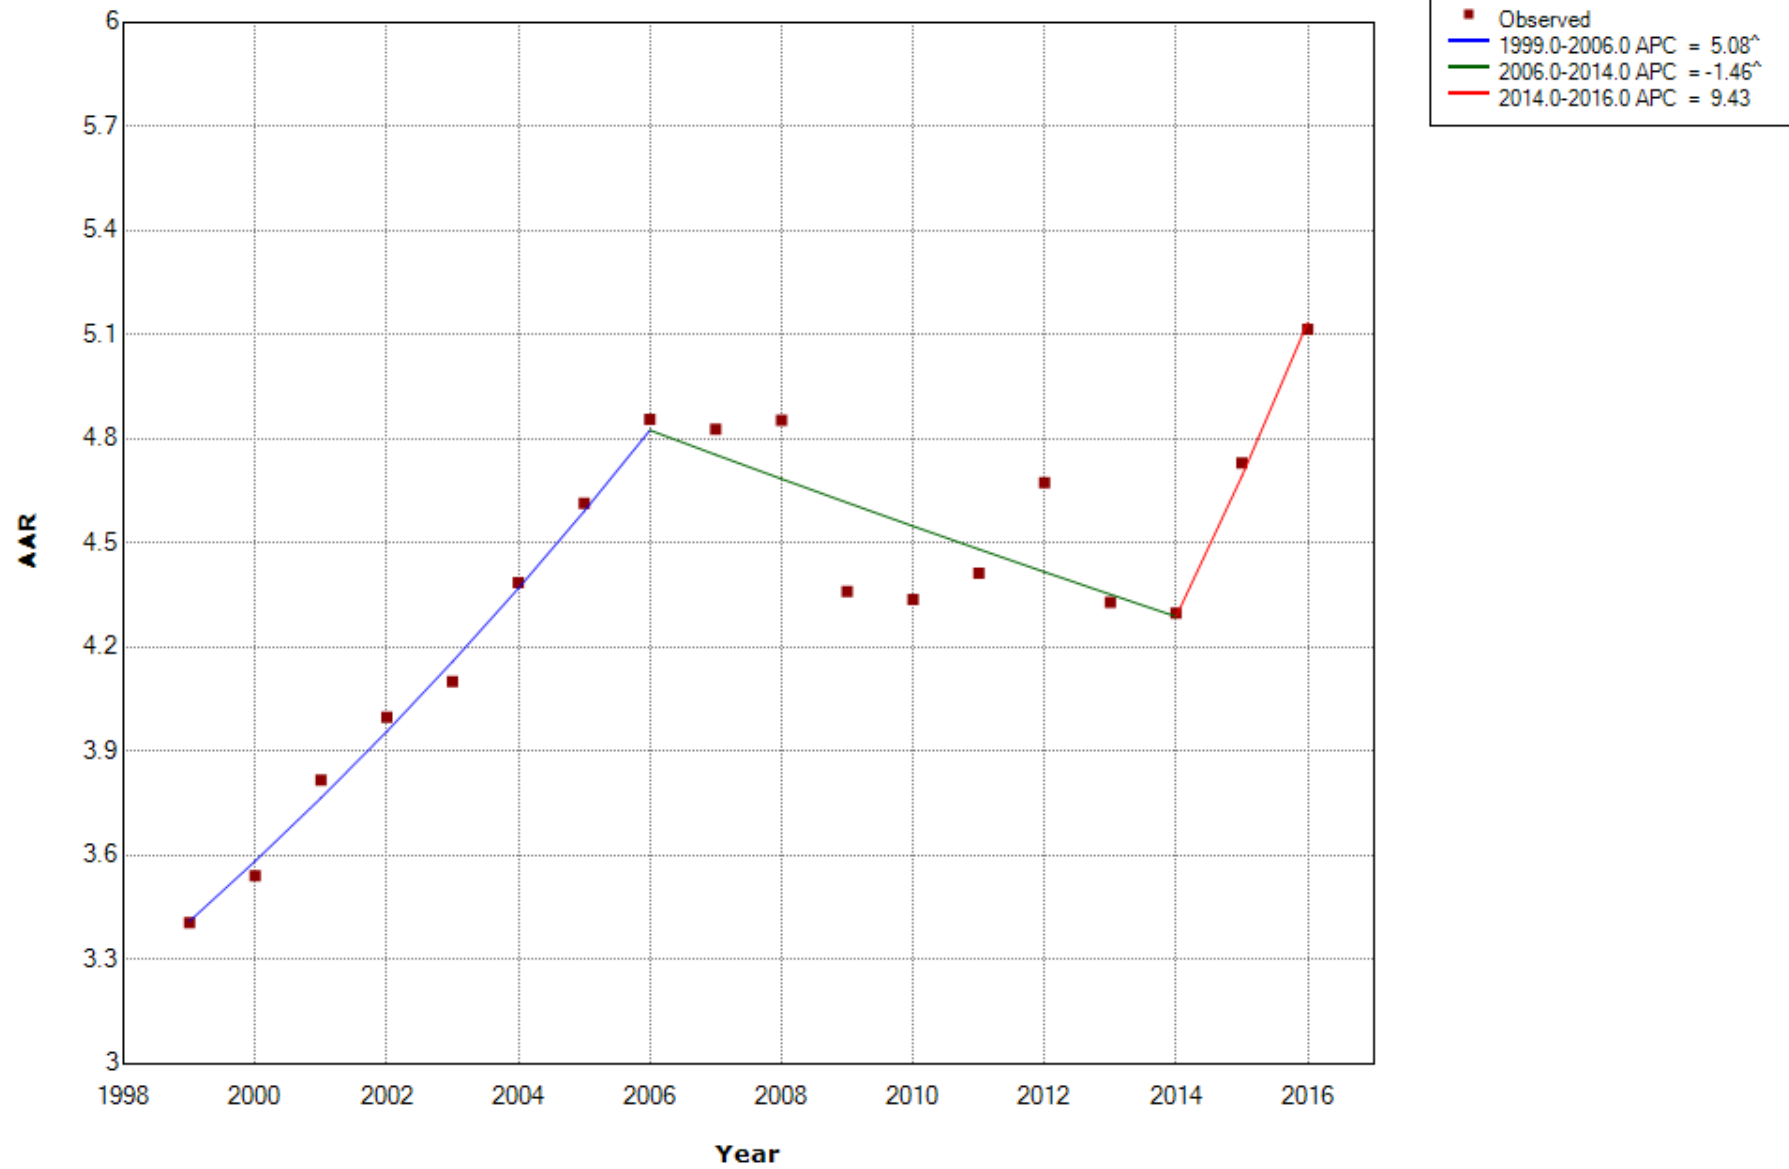

<sup>^</sup> Indicates that the Annual Percent Change (APC) is significantly different from zero at the alpha = 0.05 level.  
Final Selected Model: 2 Joinpoints.

Pedestrian, cyclist, and motorcycle injury in transport accident (V01-V29) / Hispanics: 2 Joinpoints

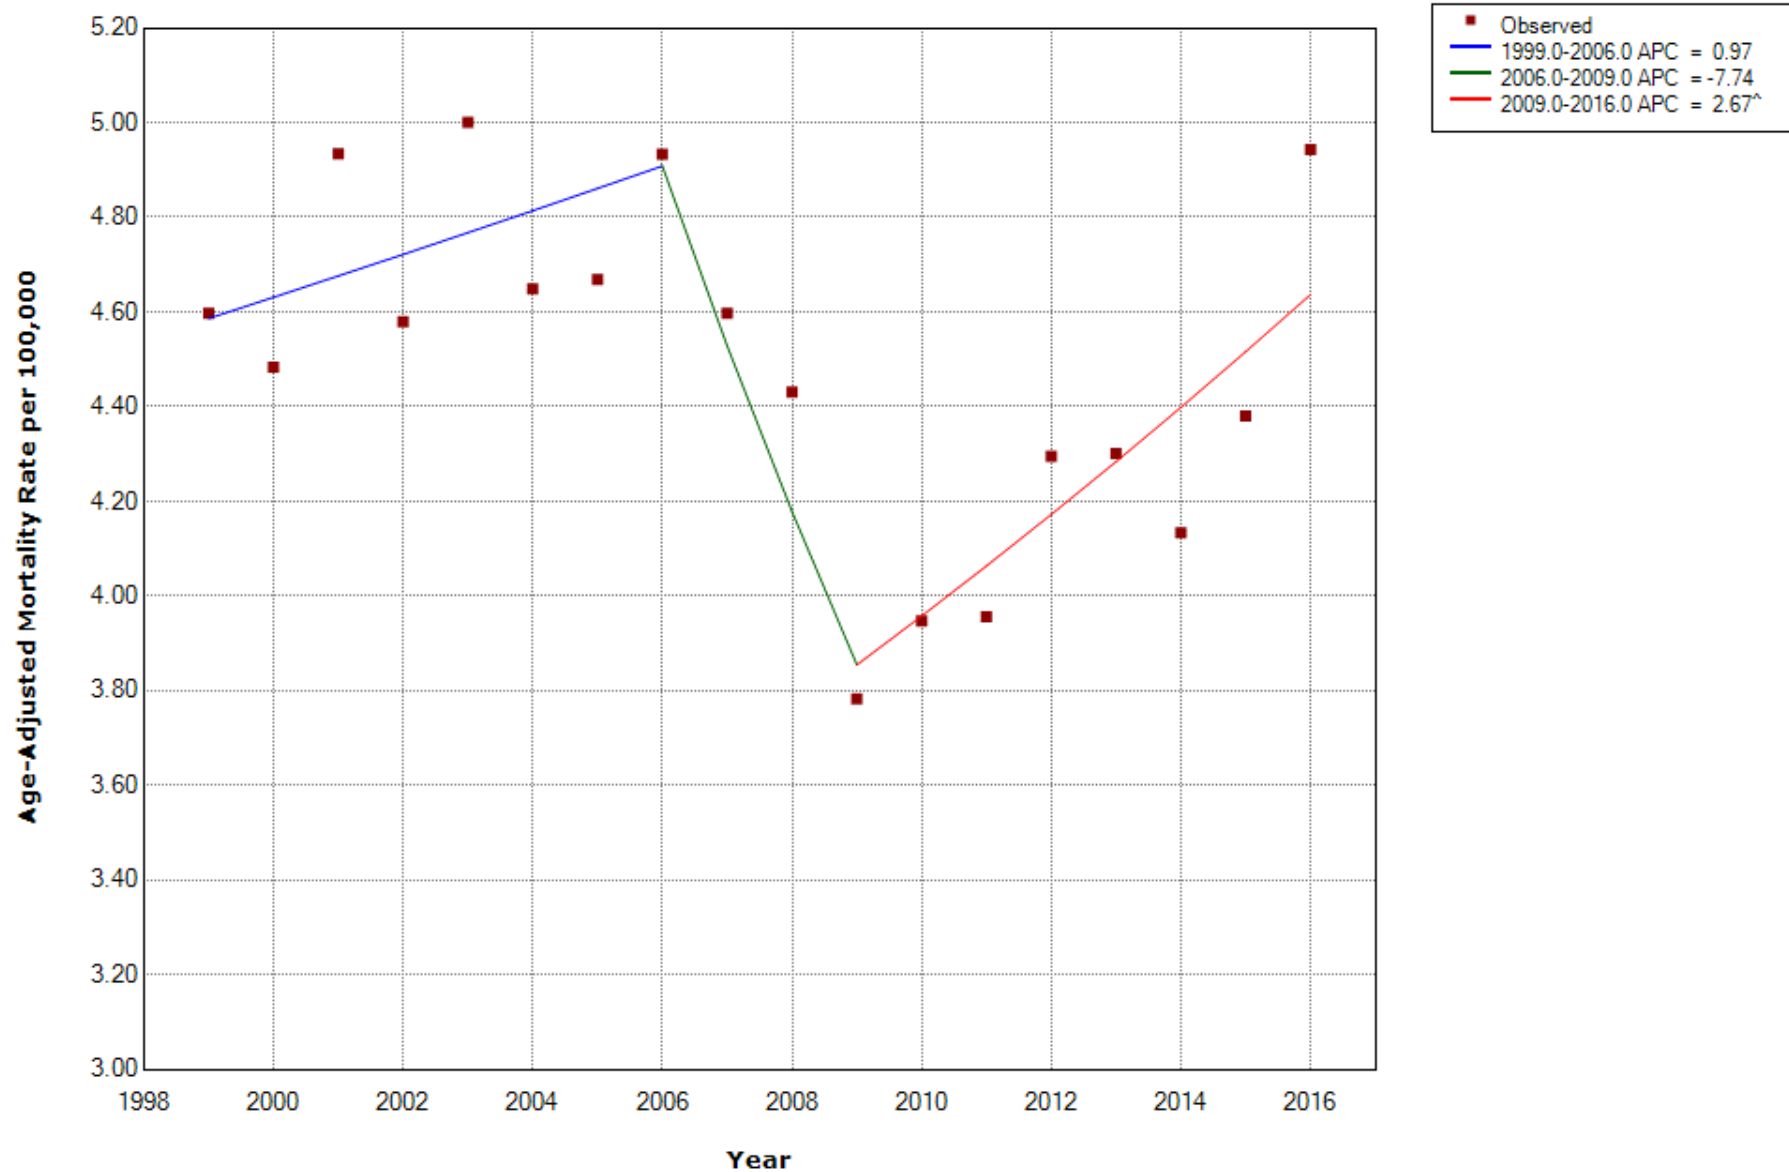

^ Indicates that the Annual Percent Change (APC) is significantly different from zero at the alpha = 0.05 level.  
Final Selected Model: 2 Joinpoints.

Pedestrian, cyclist, and motorcycle injury in transport accident (V01-V29) / NH API: 0 Joinpoints

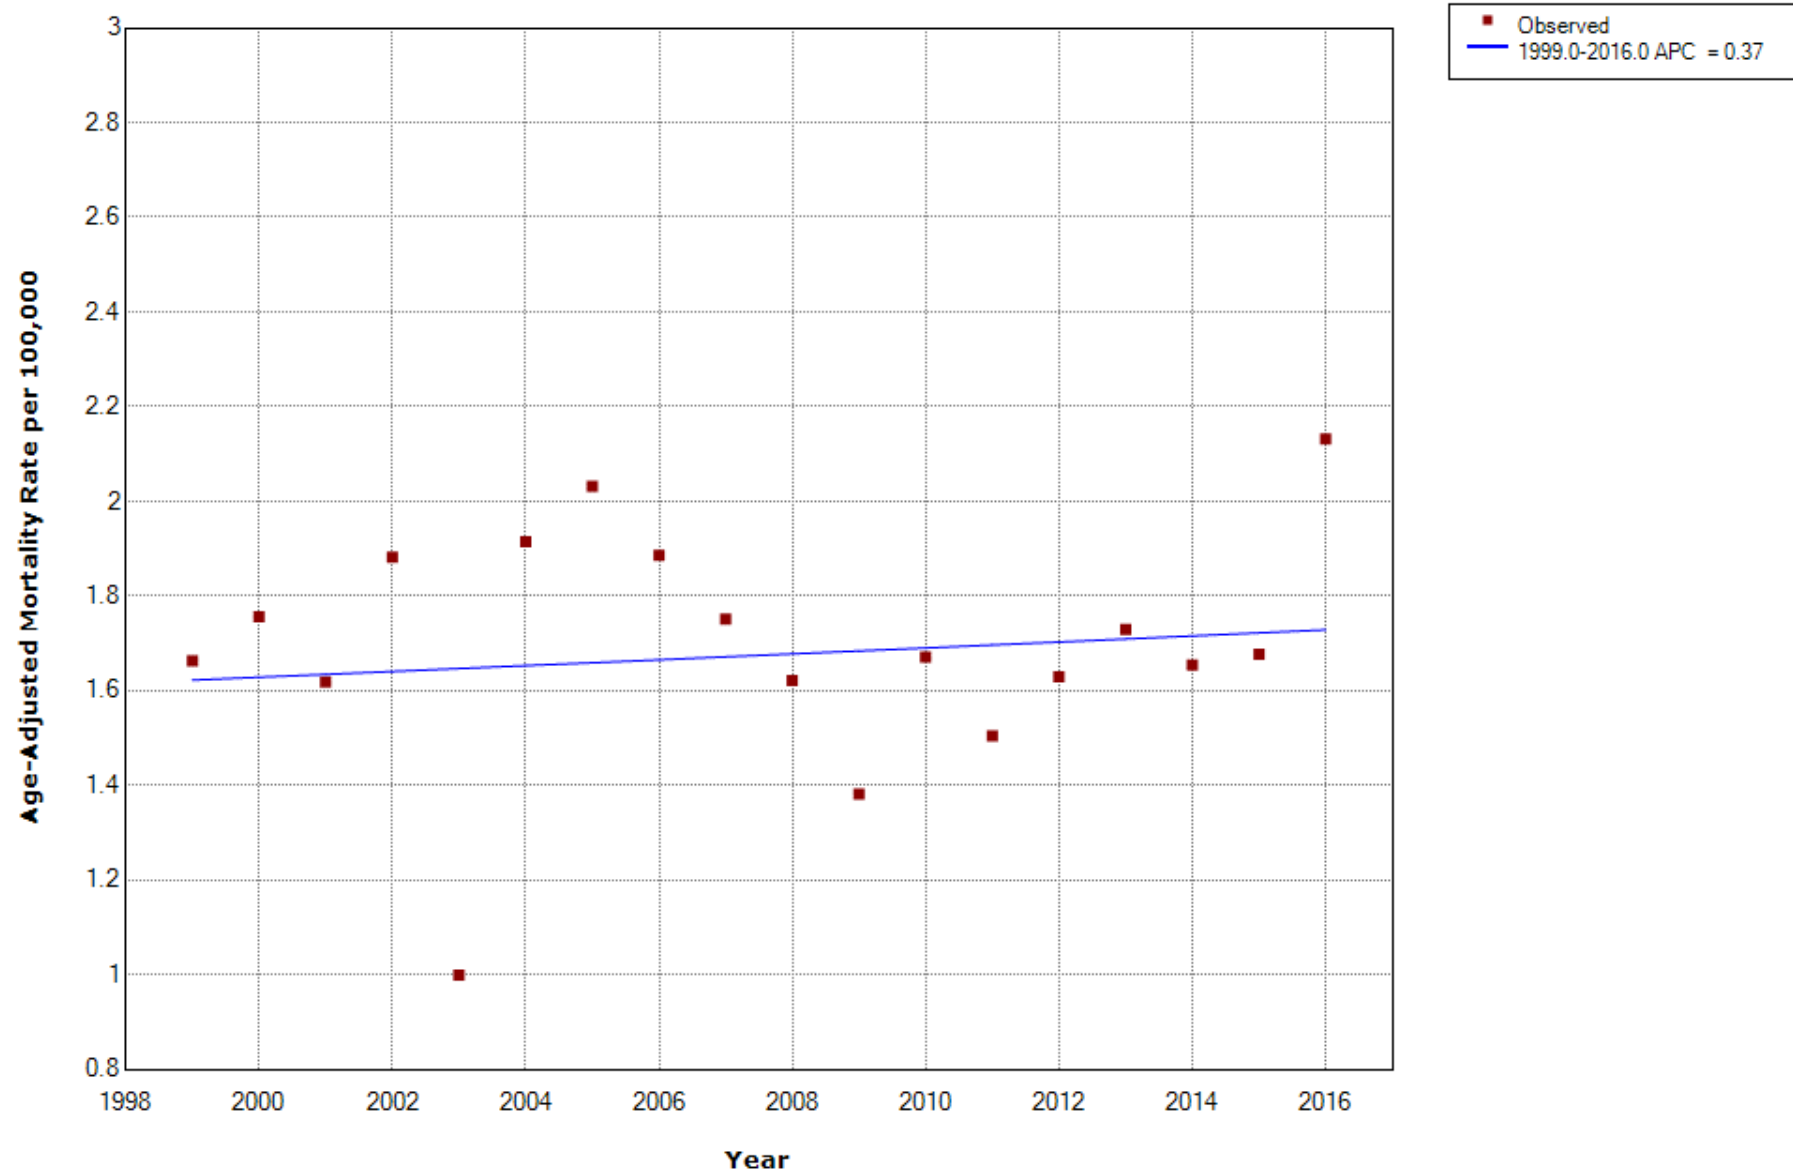

^ Indicates that the Annual Percent Change (APC) is significantly different from zero at the alpha = 0.05 level.  
Final Selected Model: 0 Joinpoints.

Pedestrian, cyclist, and motorcycle injury in transport accident (V01-V29) / NH whites: 2 Joinpoints

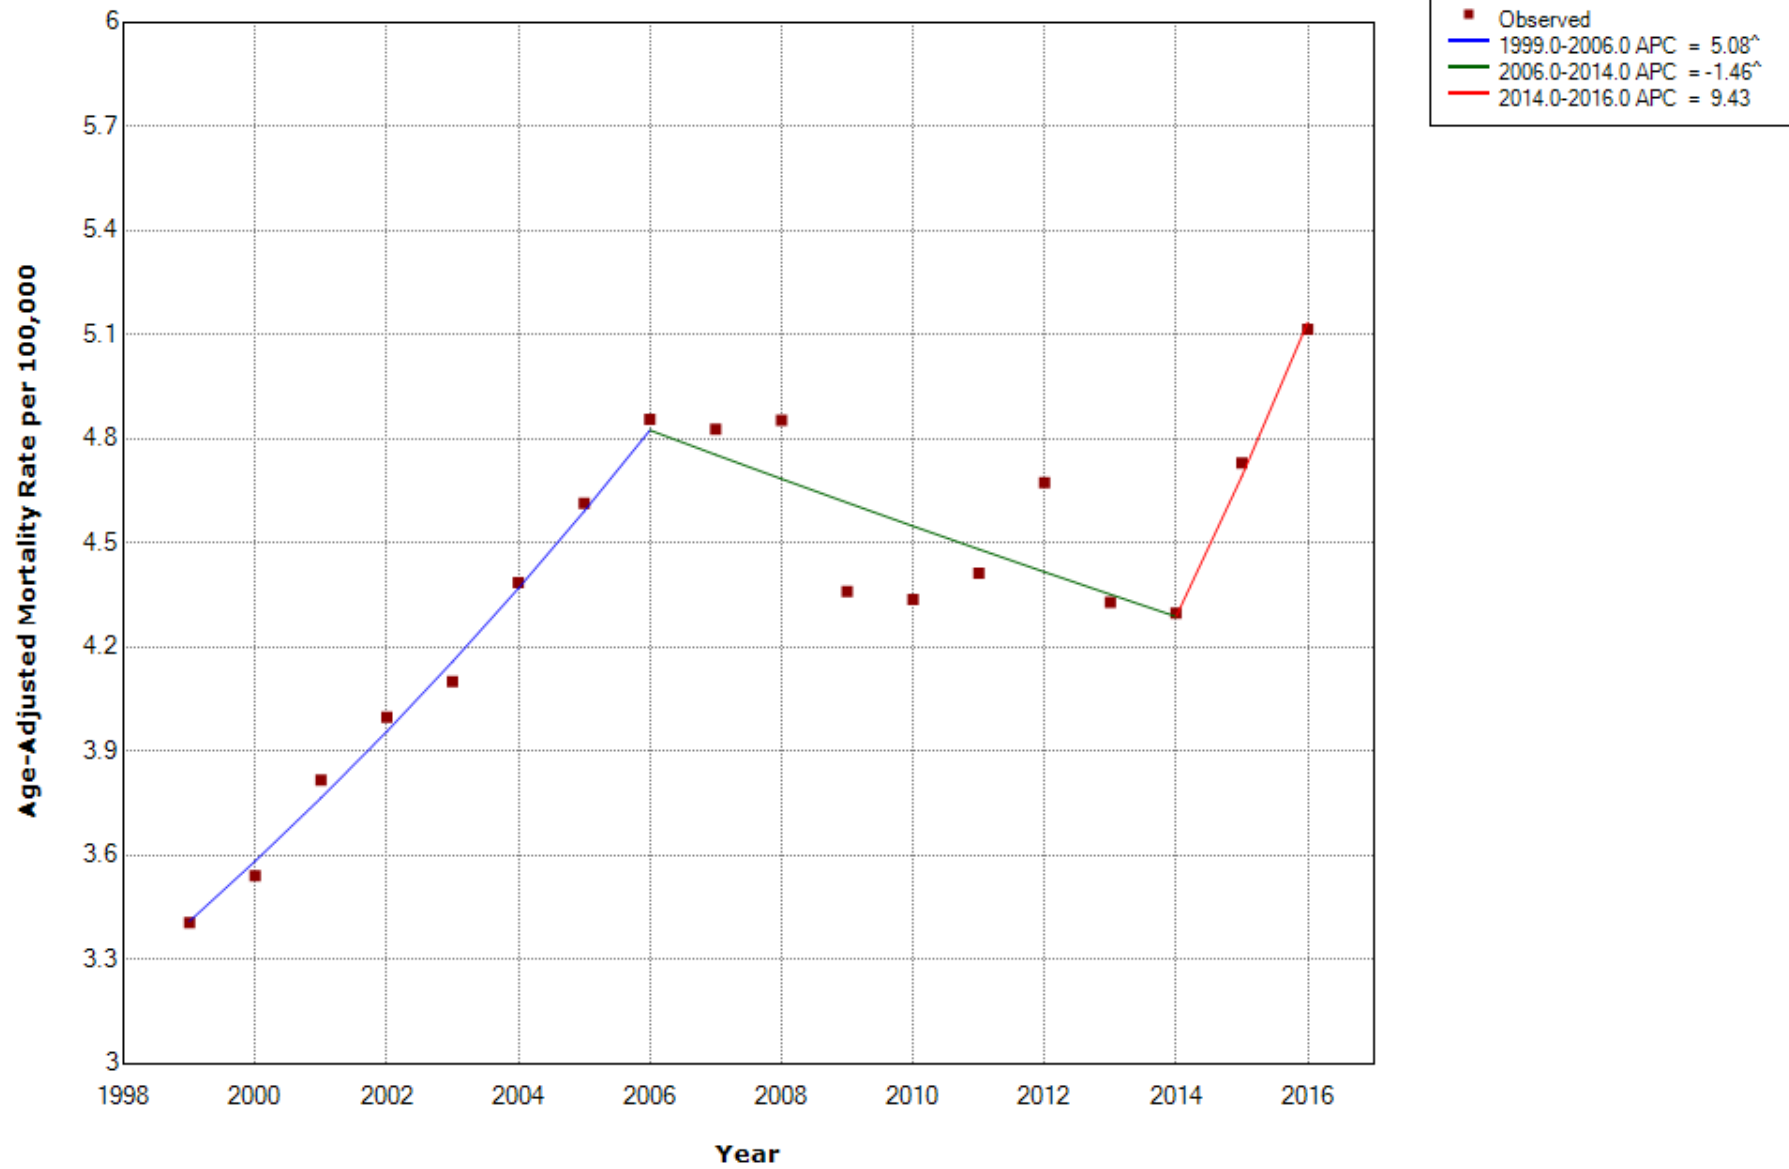

^ Indicates that the Annual Percent Change (APC) is significantly different from zero at the alpha = 0.05 level.  
Final Selected Model: 2 Joinpoints.

Other land transport and water, air, space, and other/unspecified transport accidents (V80-V99) / NH AIAN: 0 Joinpoints

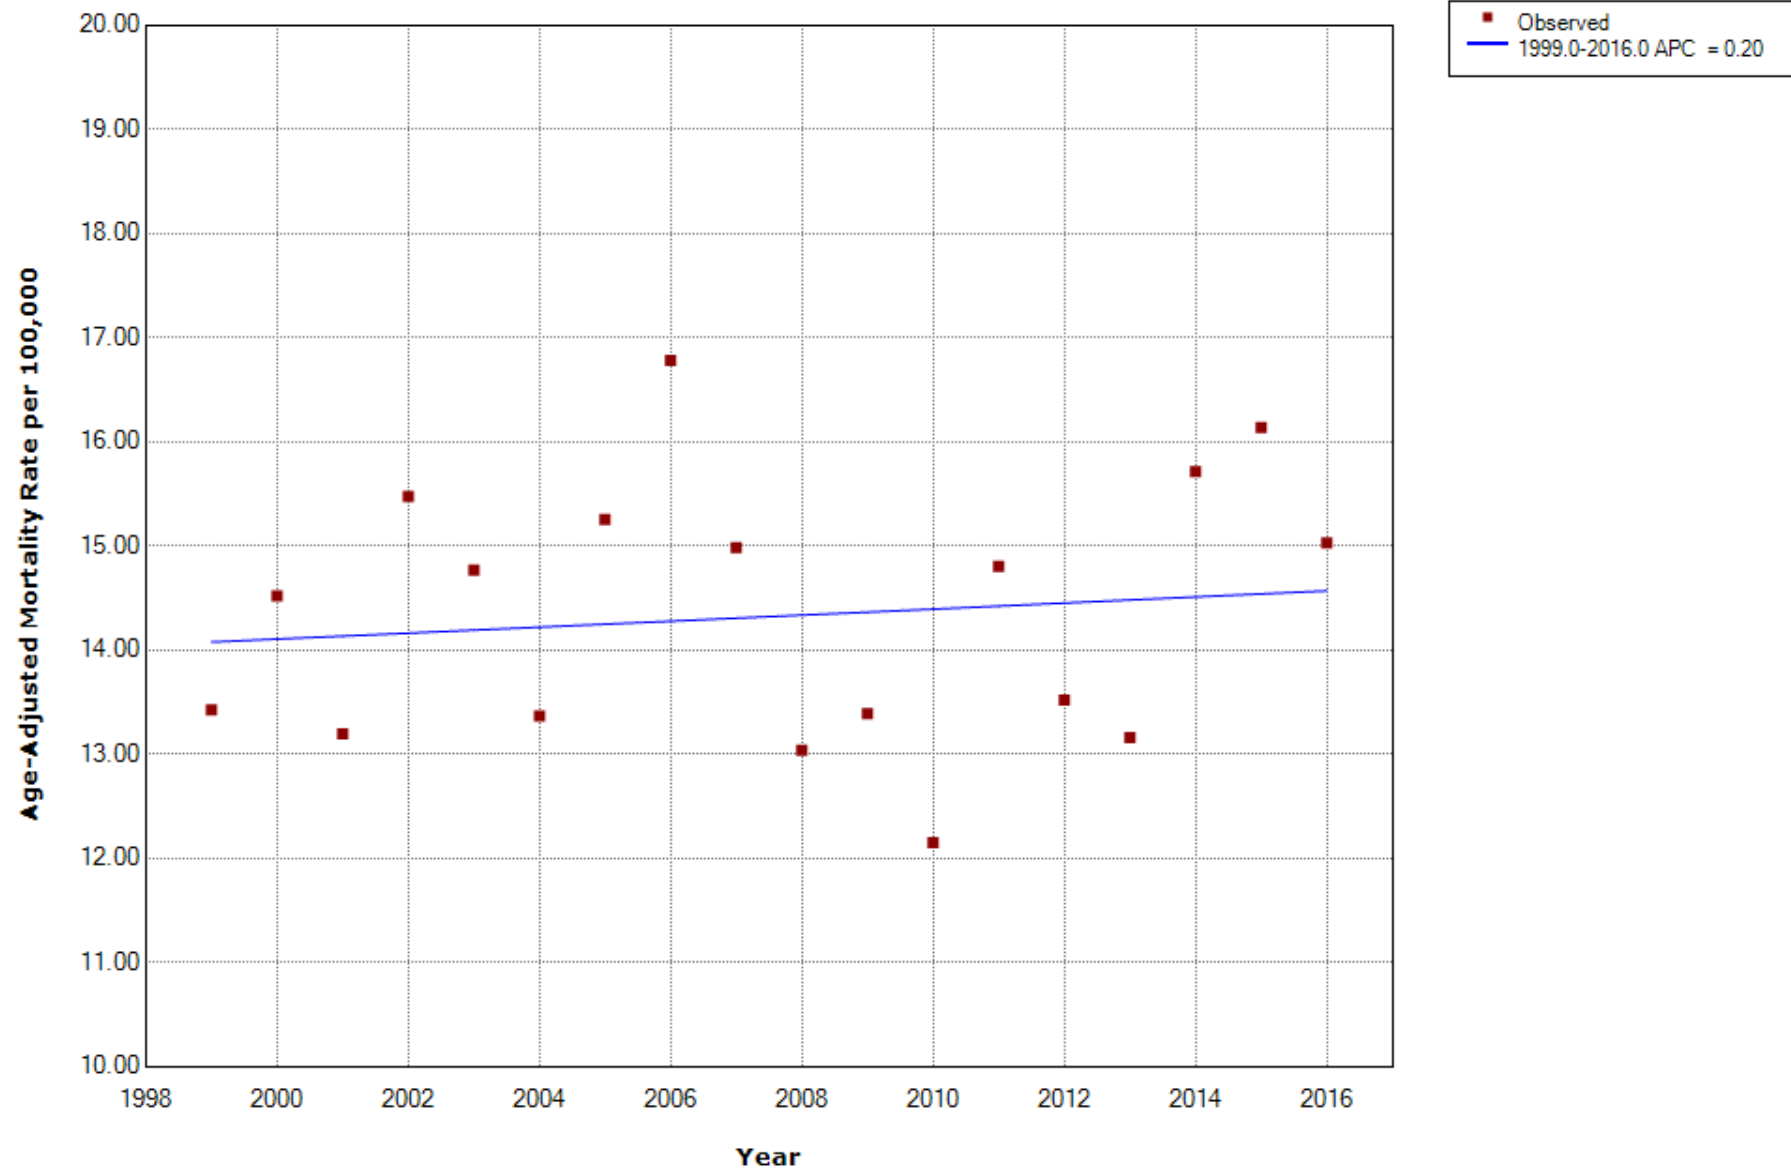

^ Indicates that the Annual Percent Change (APC) is significantly different from zero at the alpha = 0.05 level.  
Final Selected Model: 0 Joinpoints.

Other land transport and water, air, space, and other/unspecified transport accidents (V80-V99) / NH API: 1 Joinpoint

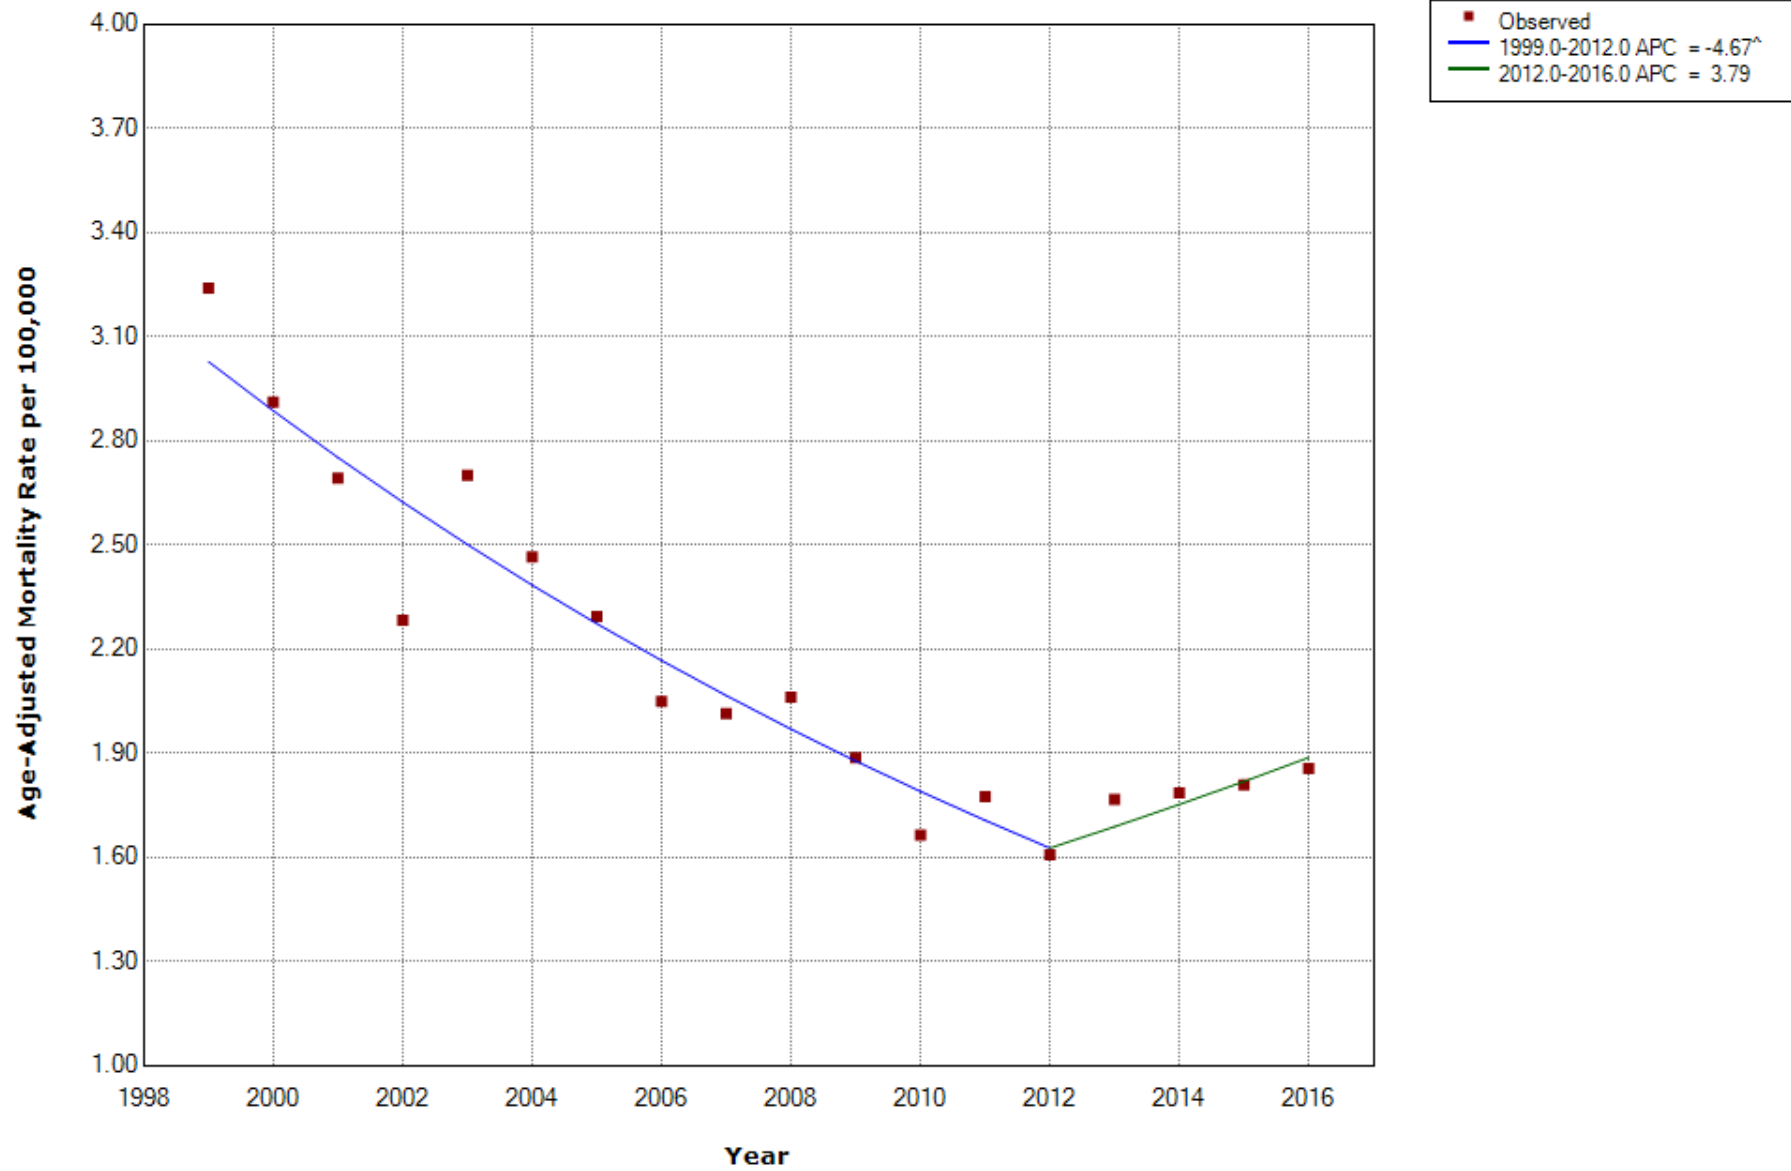

^ Indicates that the Annual Percent Change (APC) is significantly different from zero at the alpha = 0.05 level.  
Final Selected Model: 1 Joinpoint.

Other land transport and water, air, space, and other/unspecified transport accidents (V80-V99) / NH Blacks: 1 Joinpoint

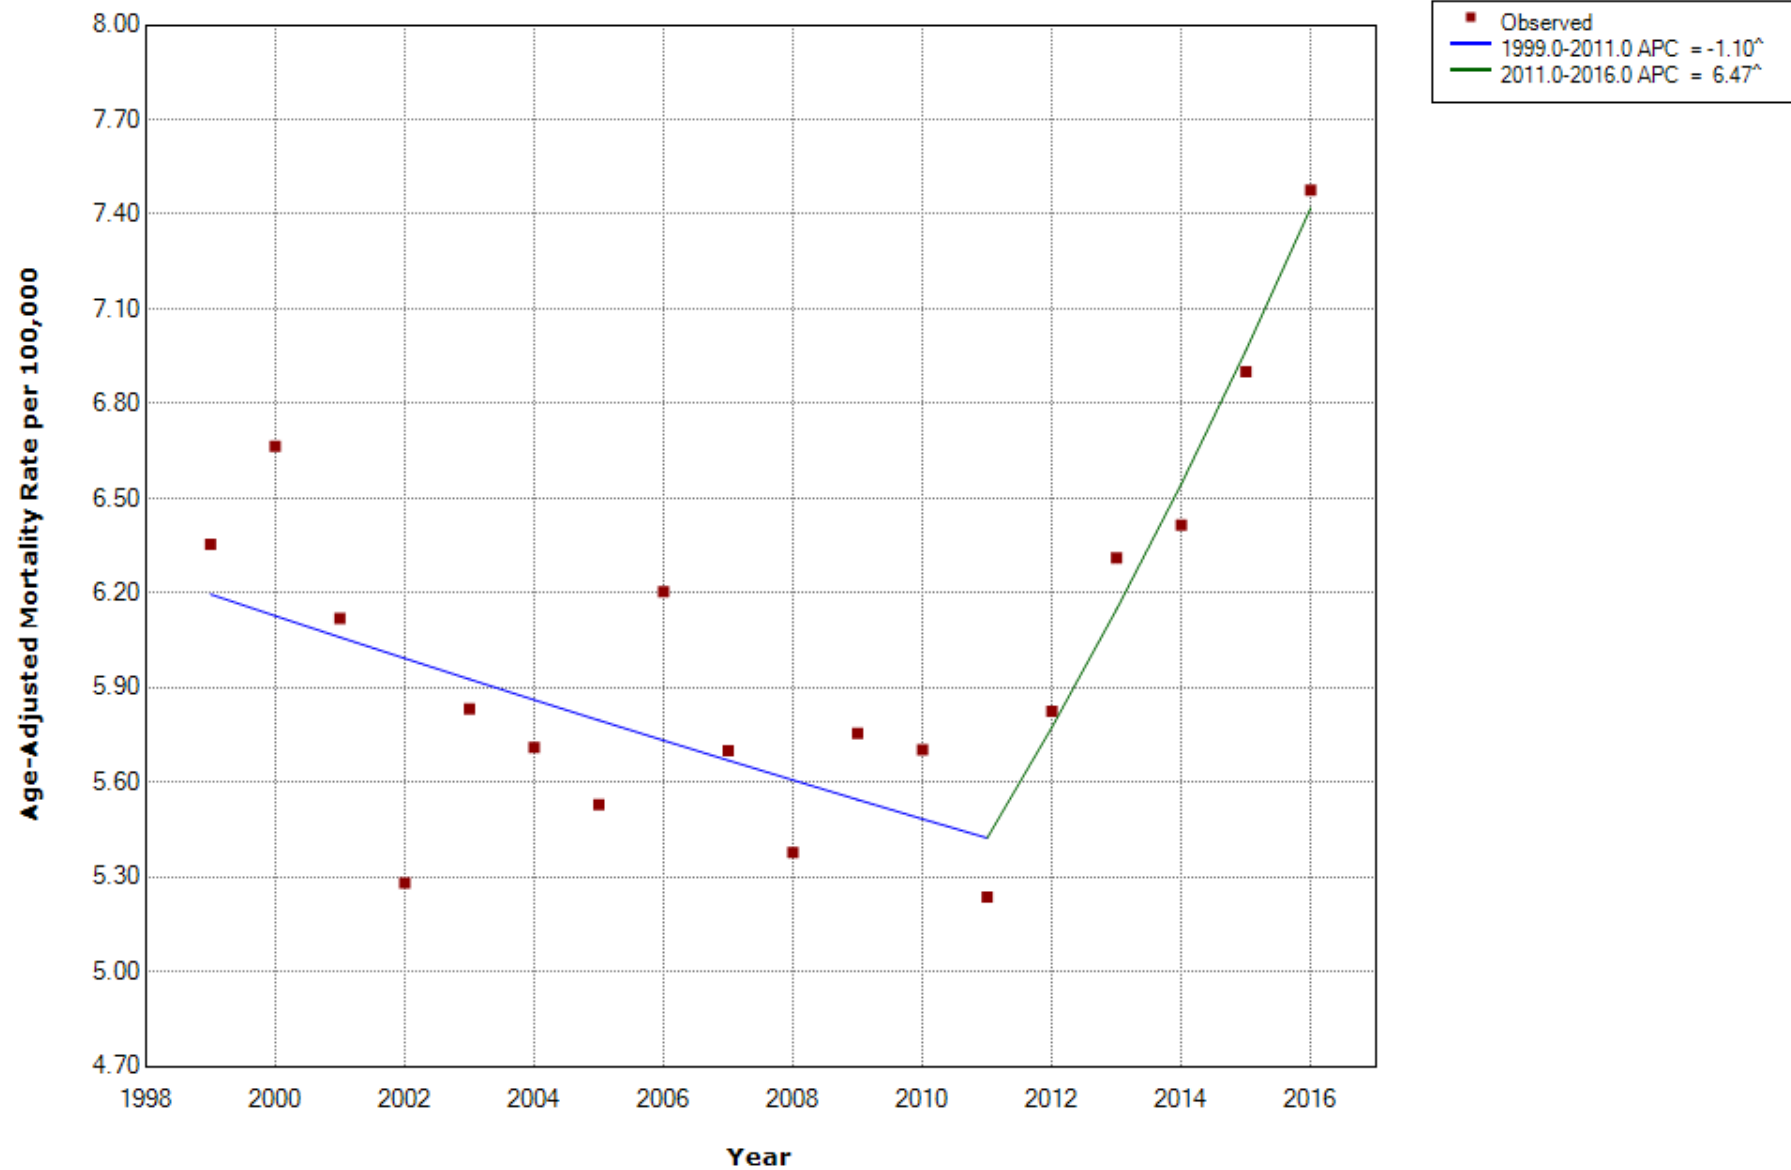

^ Indicates that the Annual Percent Change (APC) is significantly different from zero at the alpha = 0.05 level.  
Final Selected Model: 1 Joinpoint.



Other land transport and water, air, space, and other/unspecified transport accidents (V80-V99) / NH whites: 3 Joinpoints

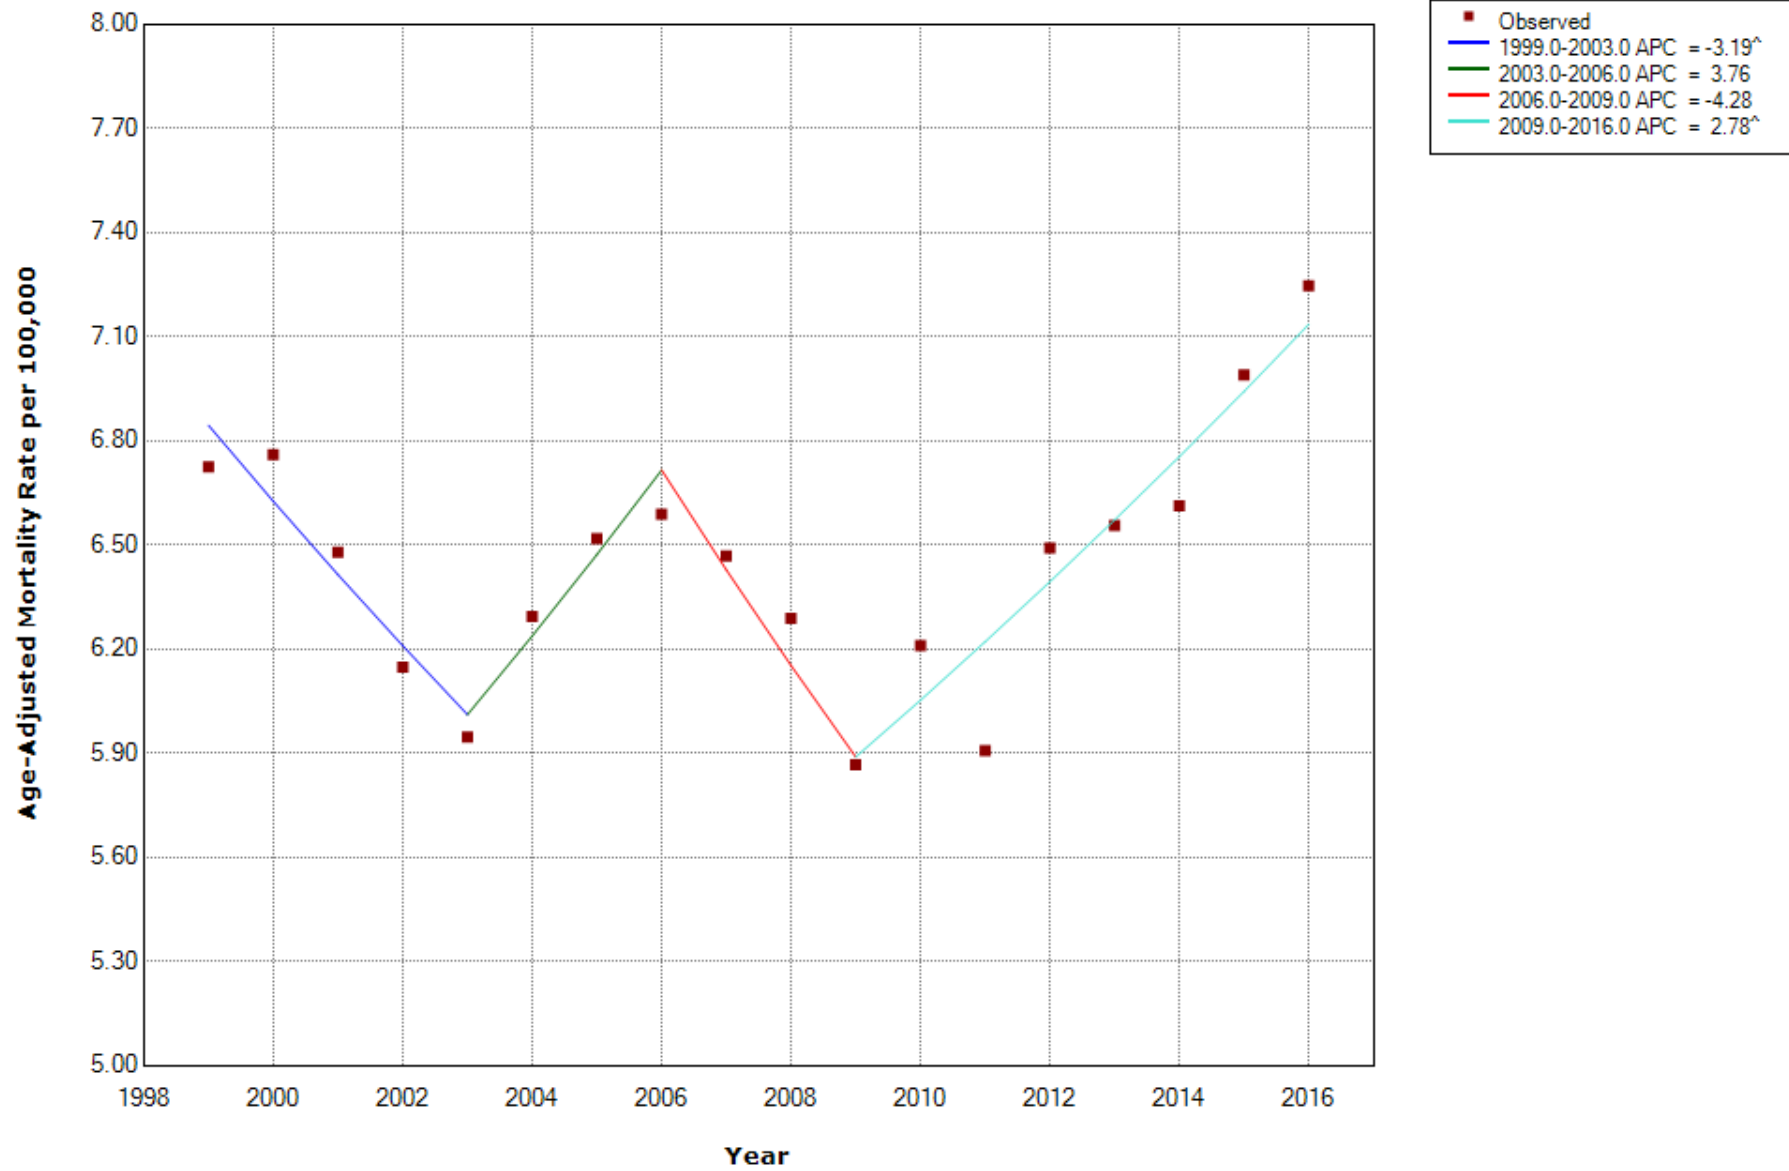

^ Indicates that the Annual Percent Change (APC) is significantly different from zero at the alpha = 0.05 level.  
Final Selected Model: 3 Joinpoints.

Other land transport and water, air, space, and other/unspecified transport accidents (V80-V99) / Hispanics: 3 Joinpoints

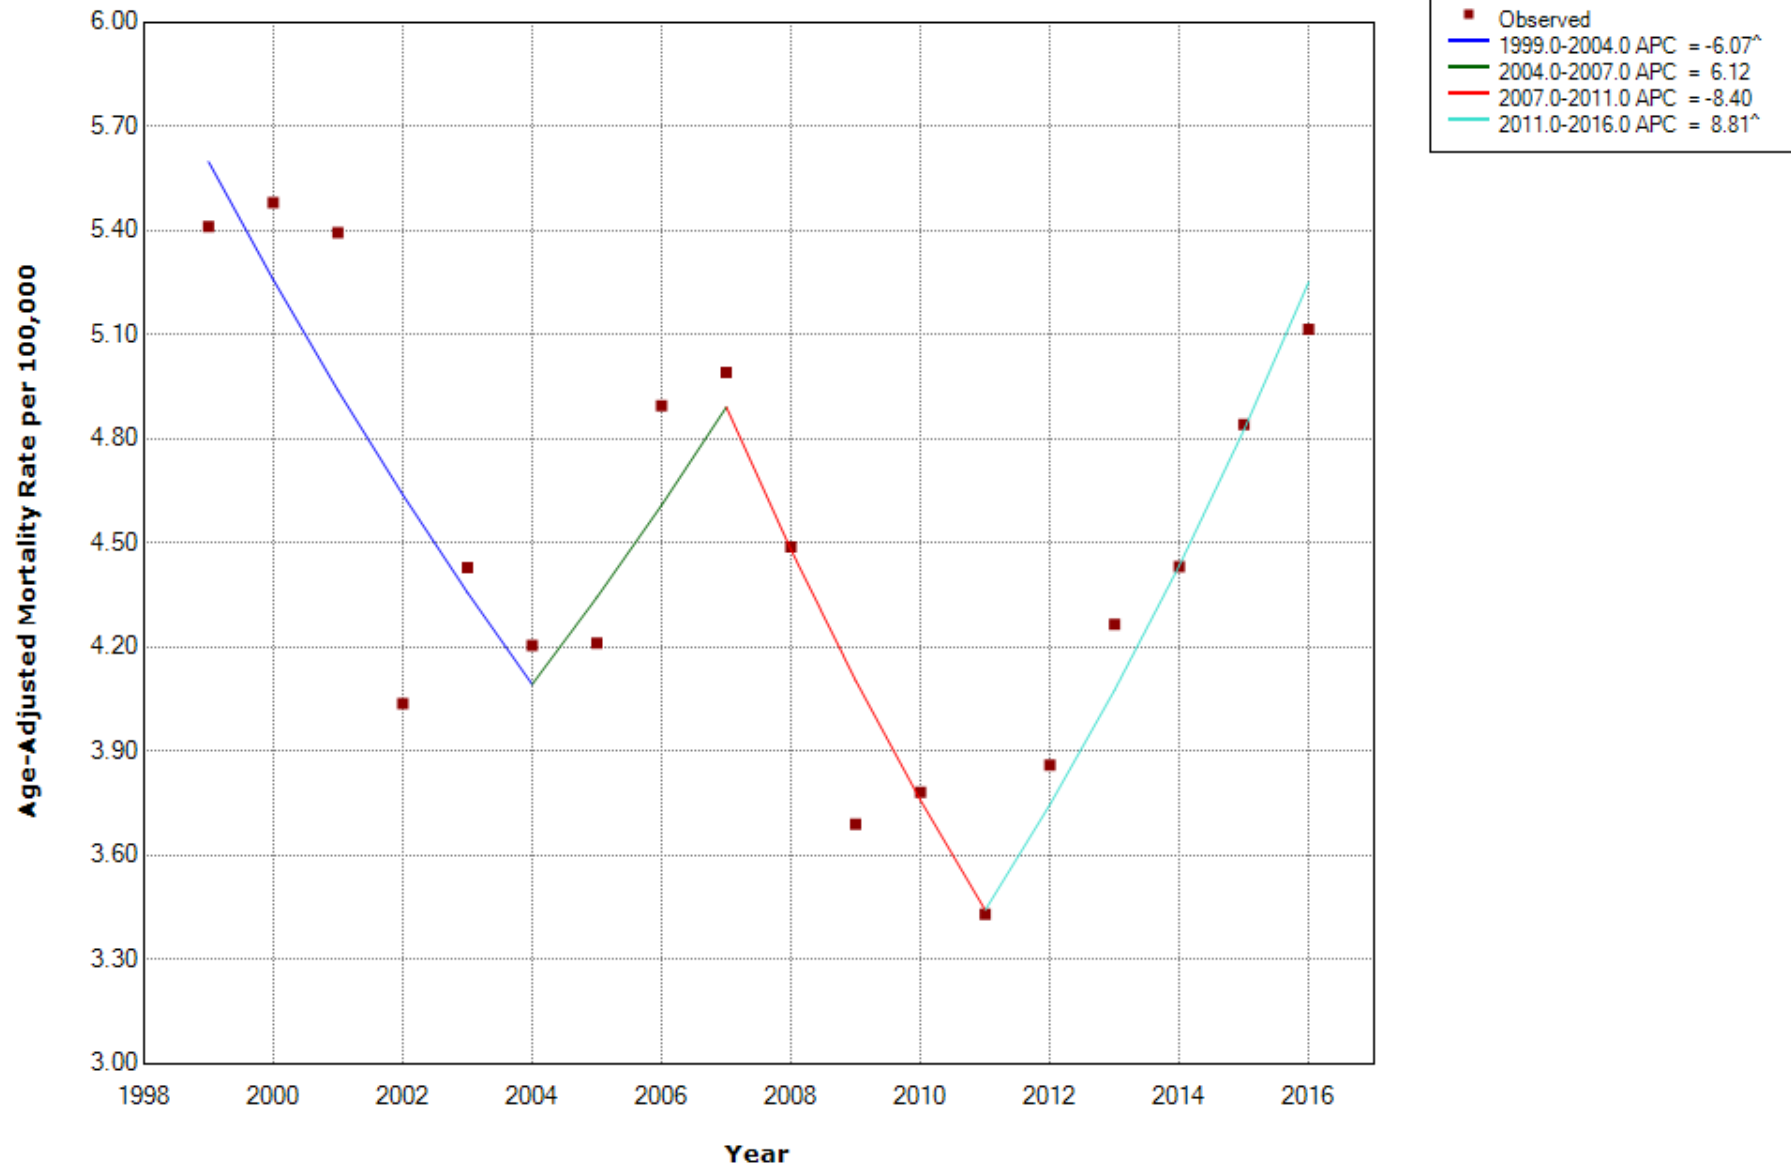

^ Indicates that the Annual Percent Change (APC) is significantly different from zero at the alpha = 0.05 level.  
Final Selected Model: 3 Joinpoints.

Other external causes of accidental injury (W00-X59) / NH AIAN: 0 Joinpoints

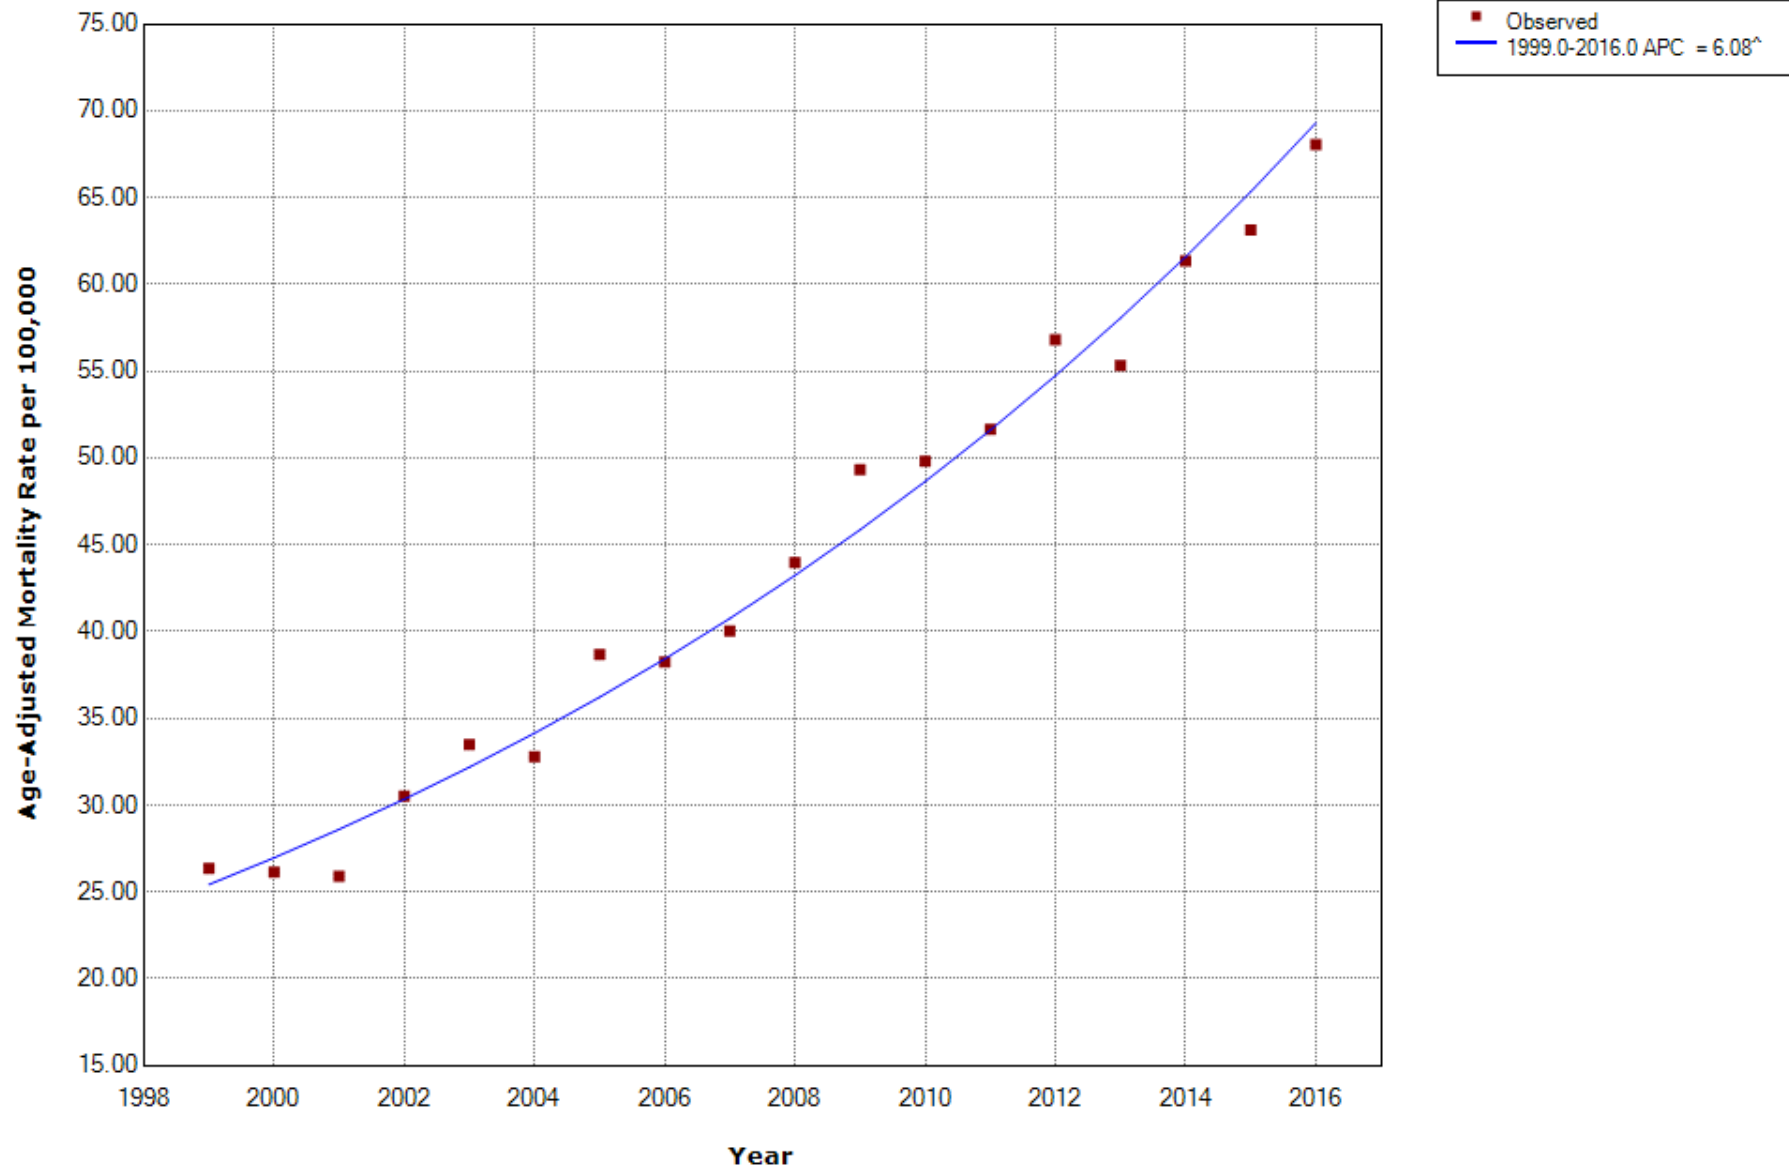

^ Indicates that the Annual Percent Change (APC) is significantly different from zero at the alpha = 0.05 level.  
Final Selected Model: 0 Joinpoints.

Other external causes of accidental injury (W00-X59) / NH API: 0 Joinpoints

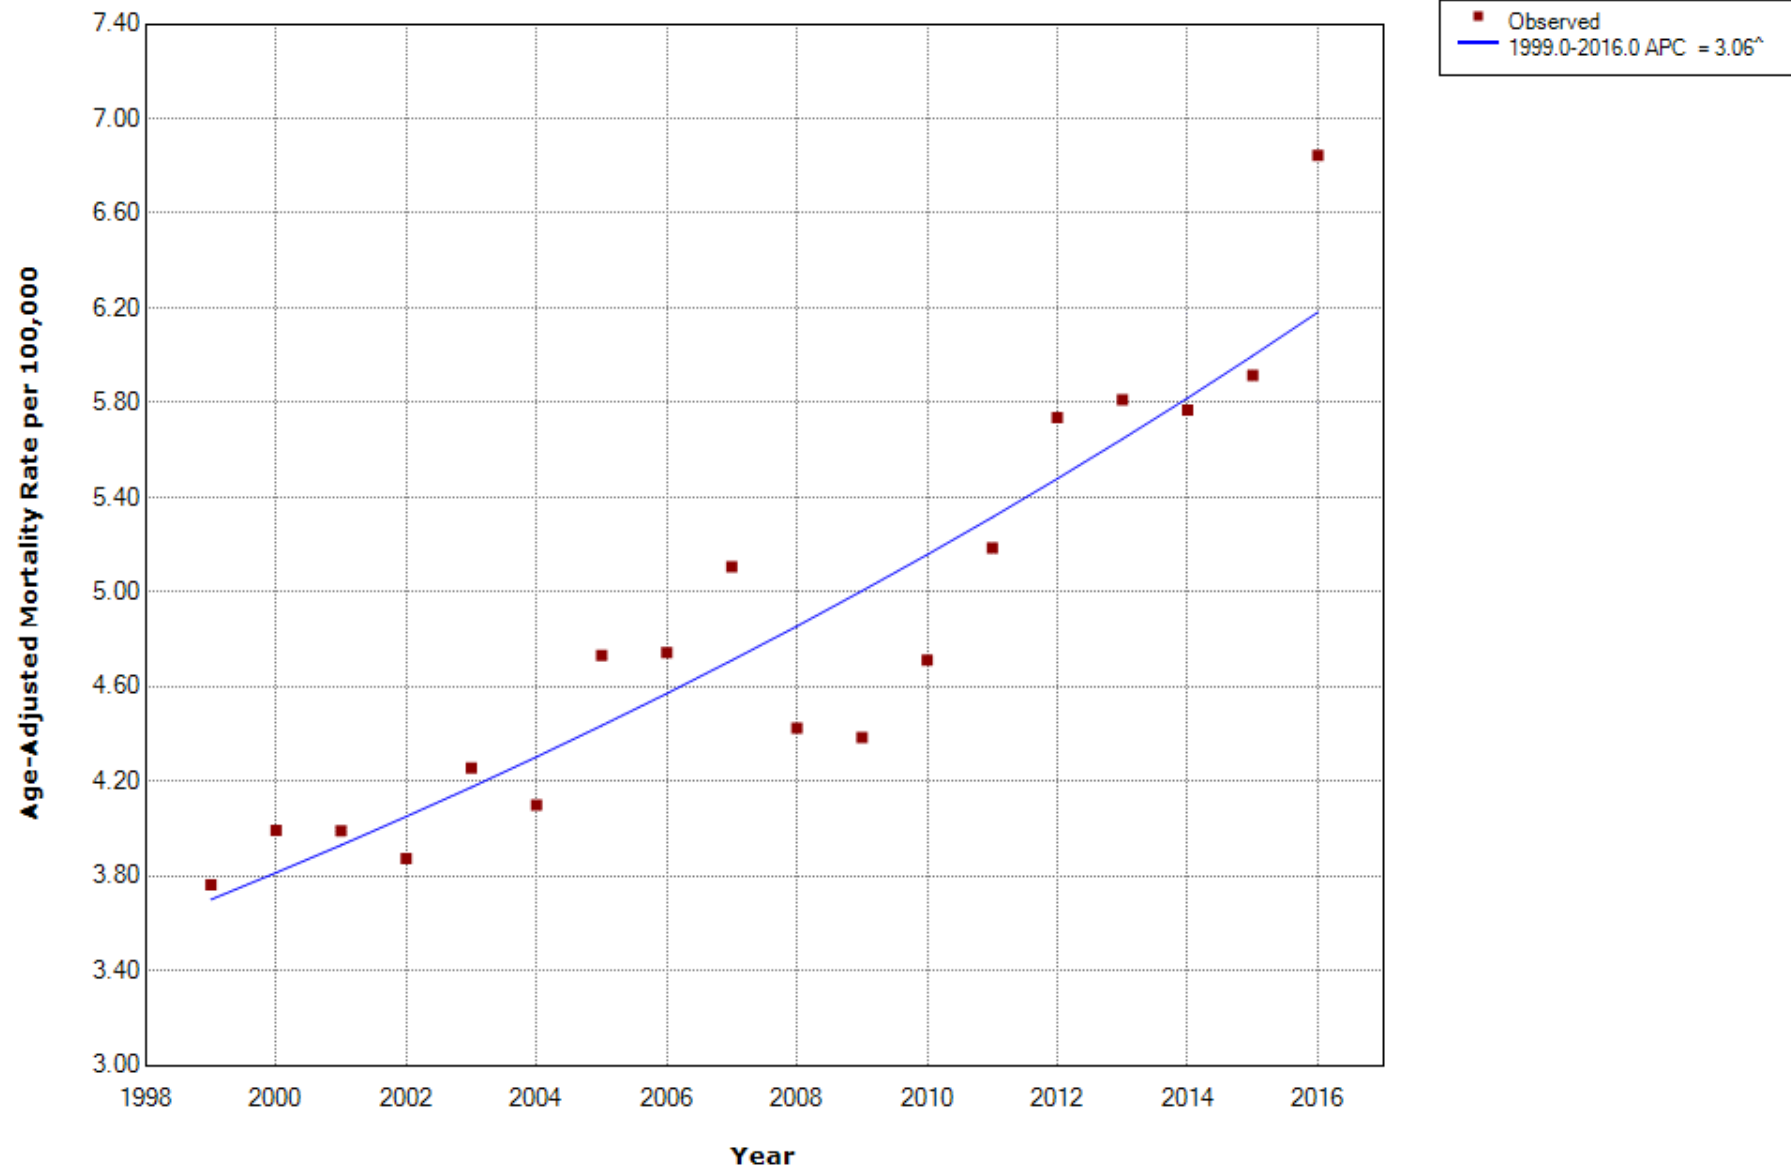

^ Indicates that the Annual Percent Change (APC) is significantly different from zero at the alpha = 0.05 level.  
Final Selected Model: 0 Joinpoints.

Other external causes of accidental injury (W00-X59) / NH Blacks: 3 Joinpoints

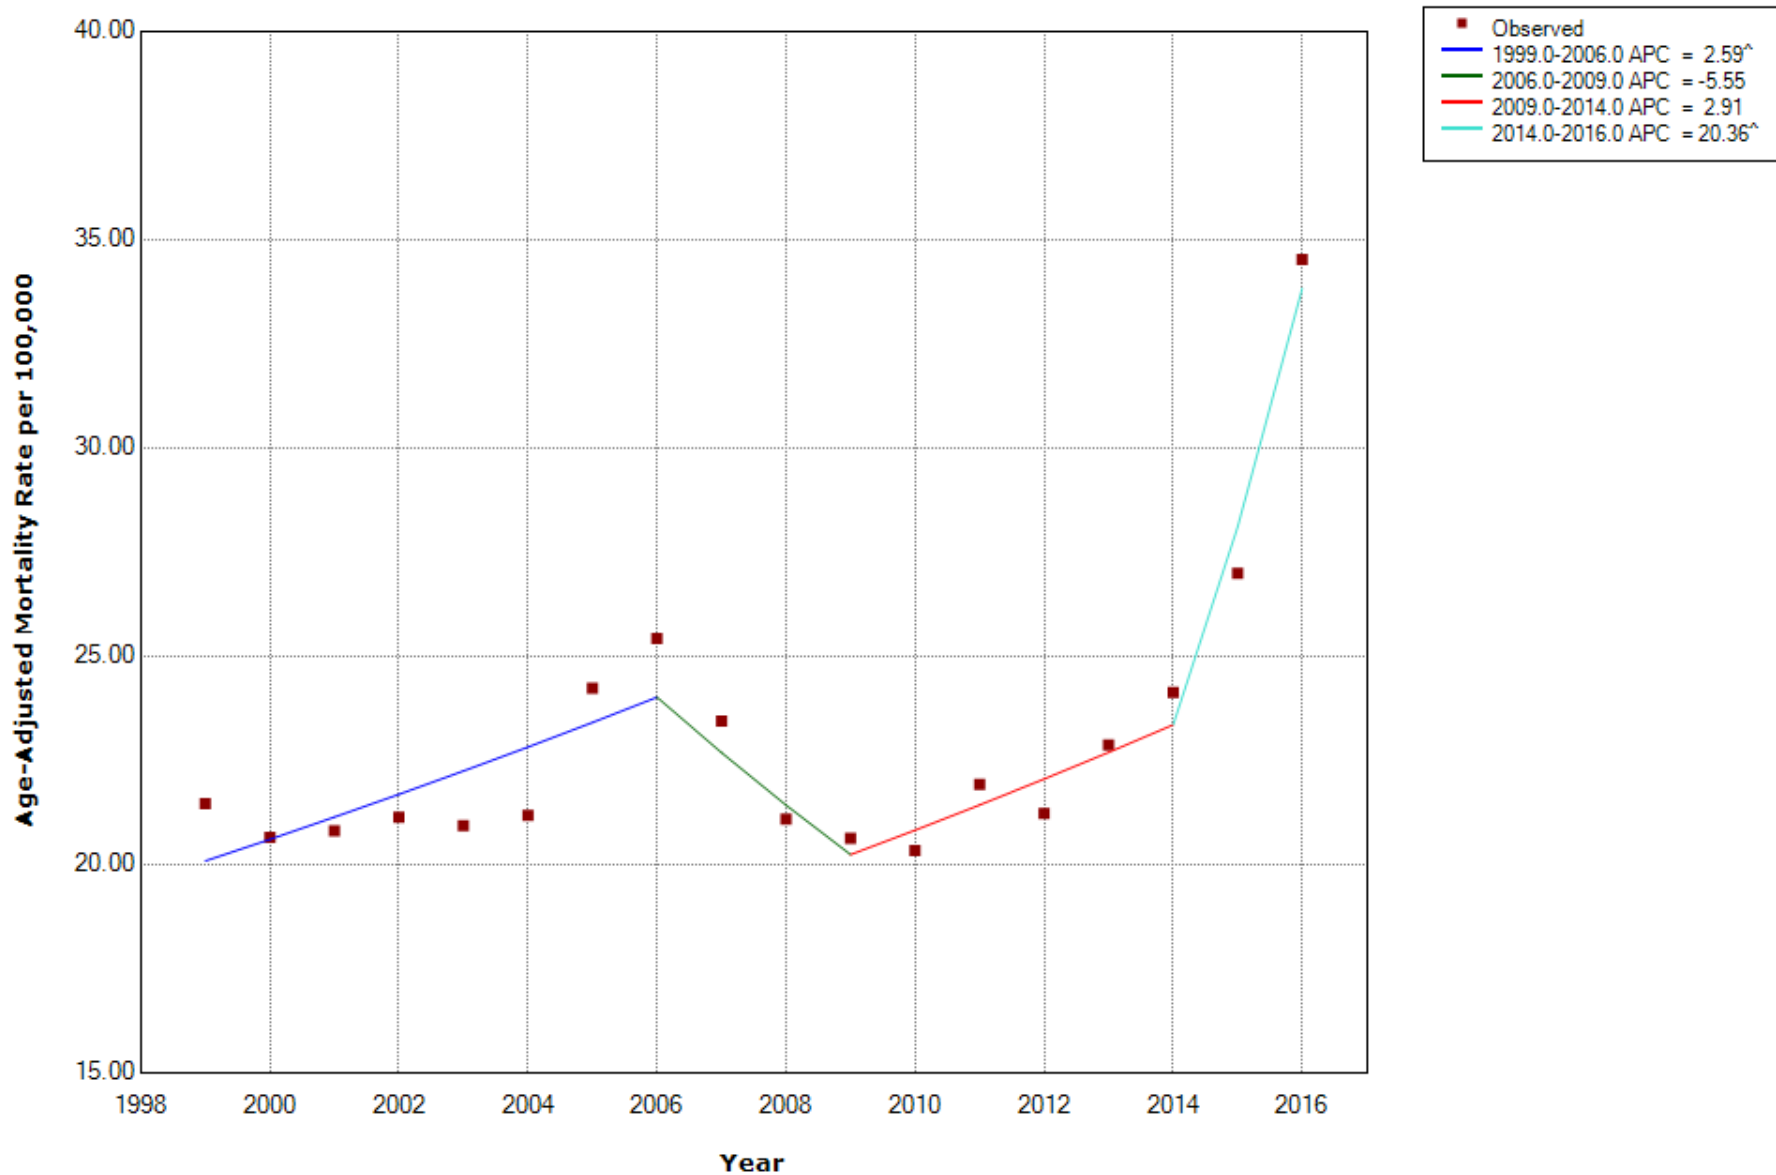

^ Indicates that the Annual Percent Change (APC) is significantly different from zero at the alpha = 0.05 level.  
Final Selected Model: 3 Joinpoints.

Other external causes of accidental injury (W00-X59) / NH whites: 2 Joinpoints

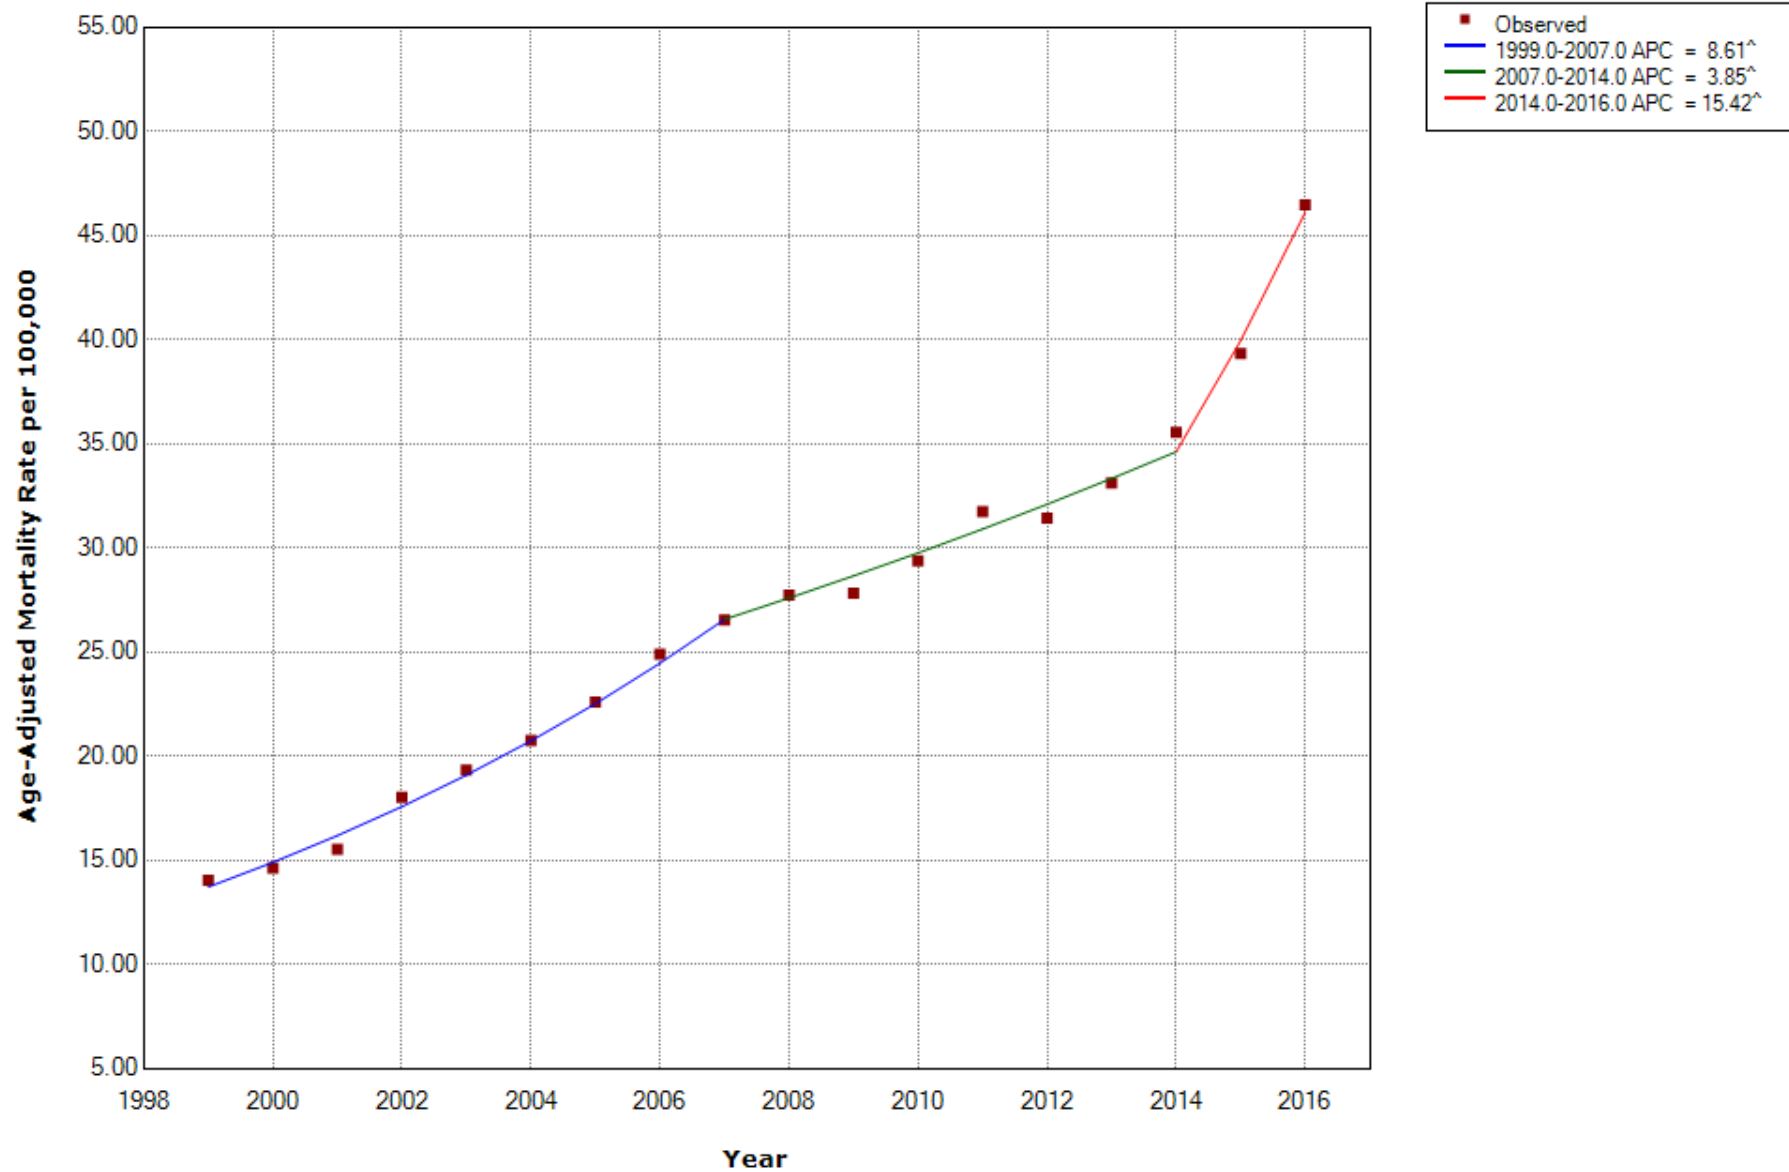

^ Indicates that the Annual Percent Change (APC) is significantly different from zero at the alpha = 0.05 level.  
Final Selected Model: 2 Joinpoints.

Other external causes of accidental injury (W00-X59) / Hispanics: 1 Joinpoint

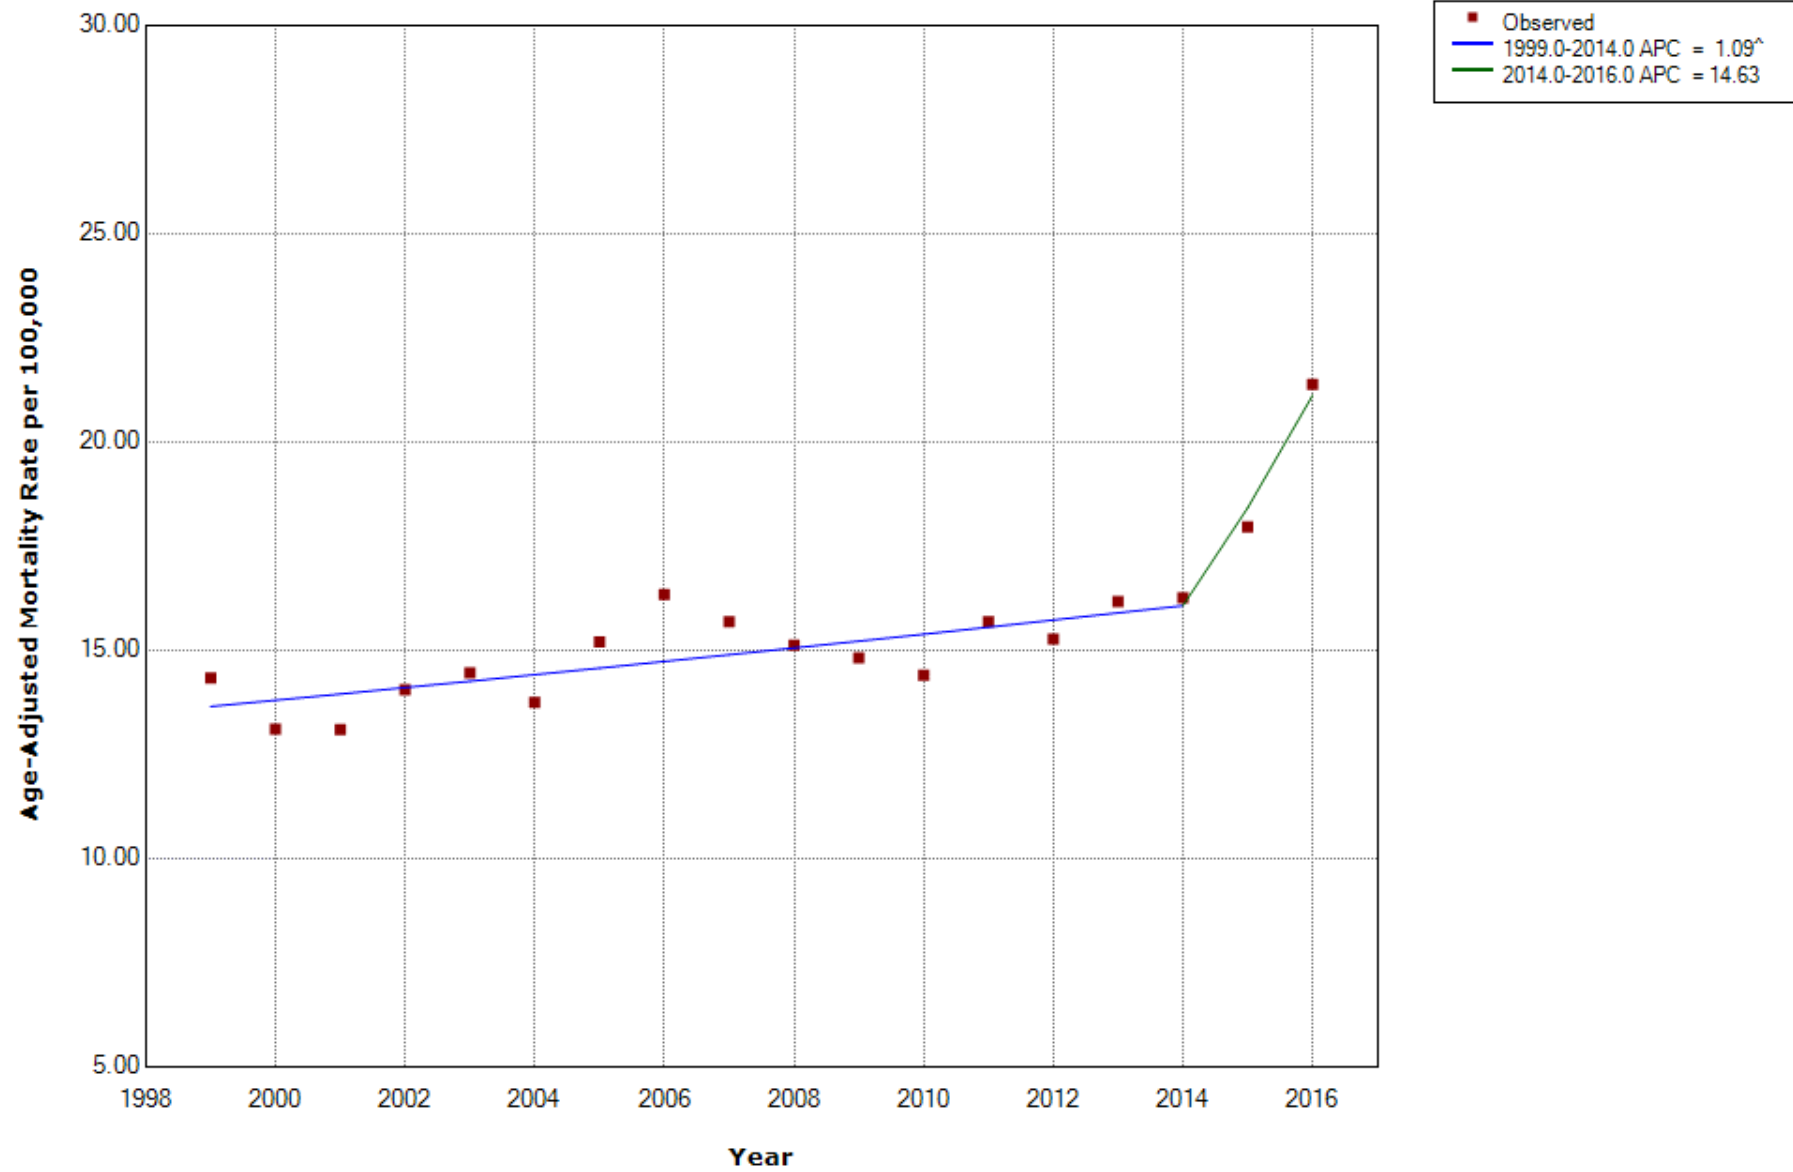

^ Indicates that the Annual Percent Change (APC) is significantly different from zero at the alpha = 0.05 level.  
Final Selected Model: 1 Joinpoint.

### Hypertensive diseases (I10-I15) / NH AIAN: 0 Joinpoints

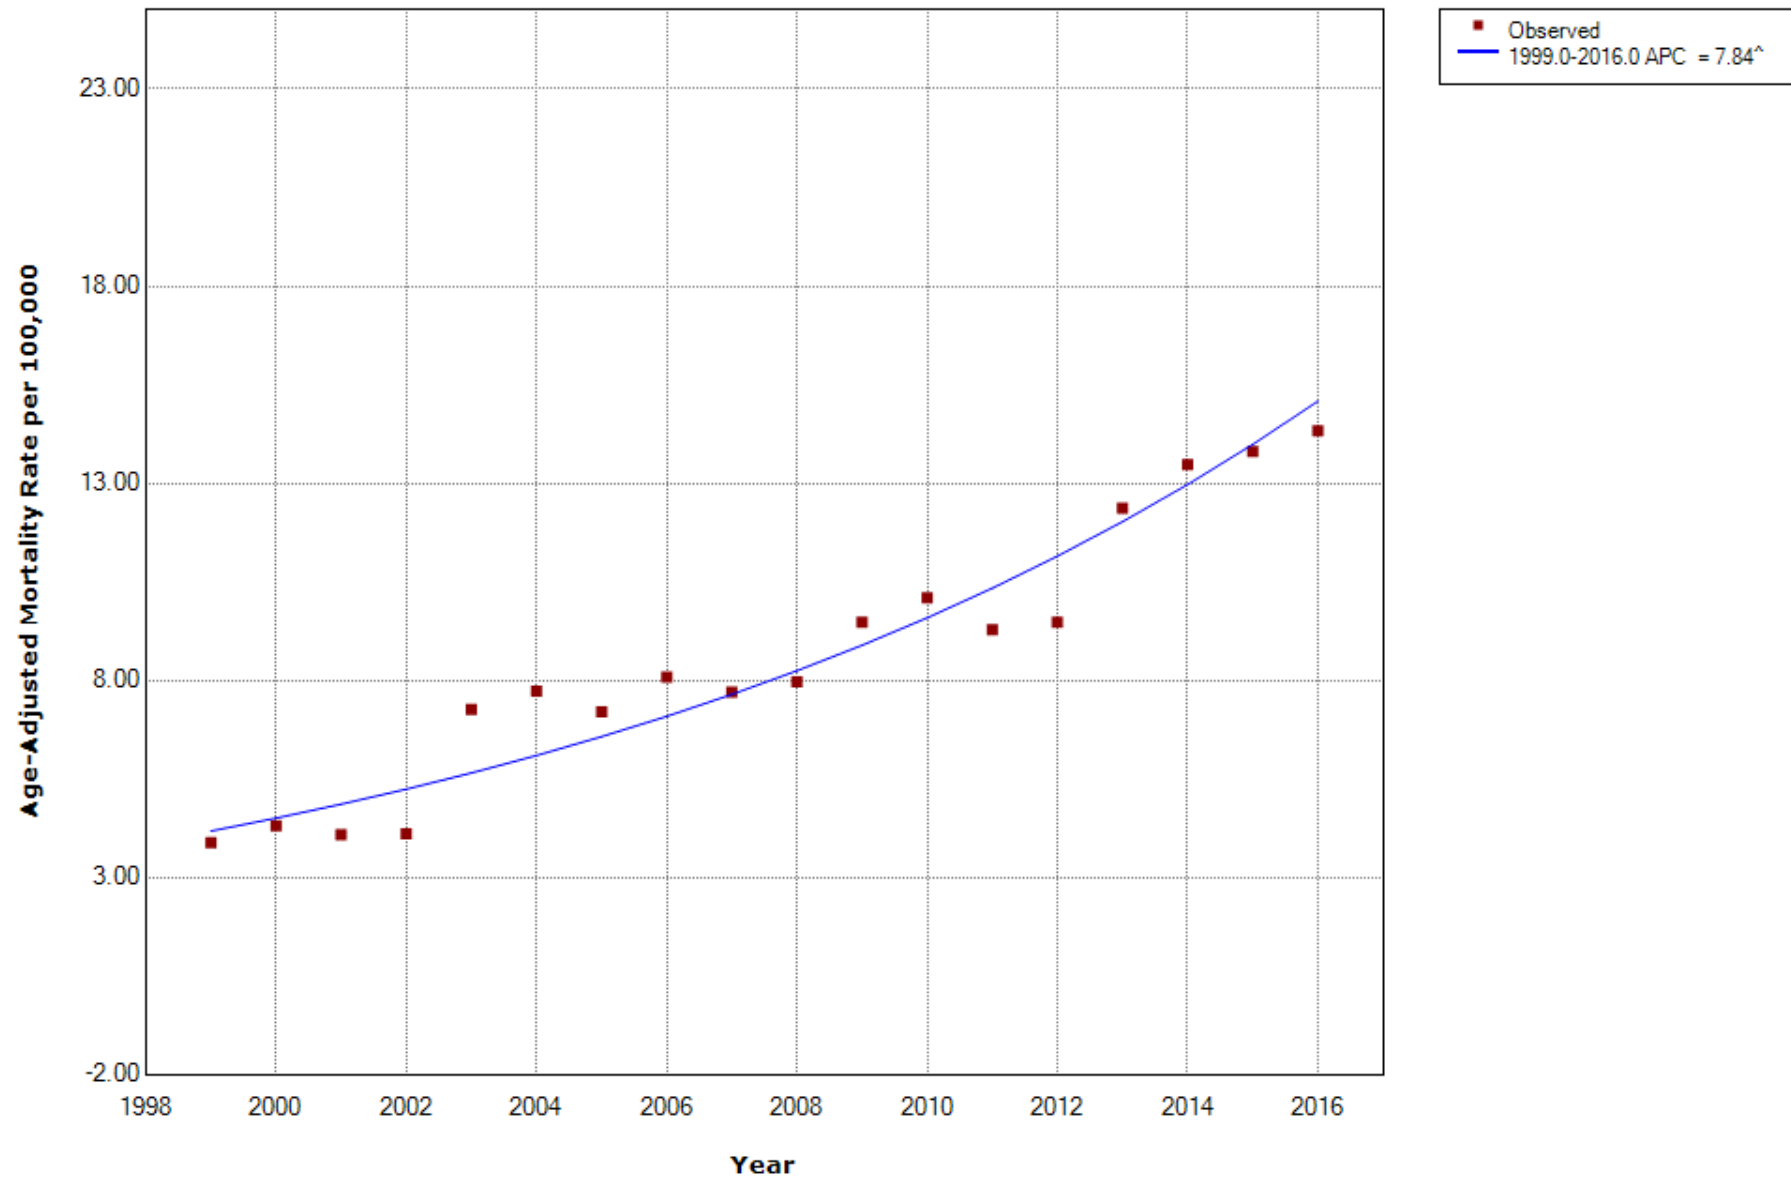

^ Indicates that the Annual Percent Change (APC) is significantly different from zero at the alpha = 0.05 level.  
Final Selected Model: 0 Joinpoints.



### Hypertensive diseases (I10-I15) / NH API: 0 Joinpoints

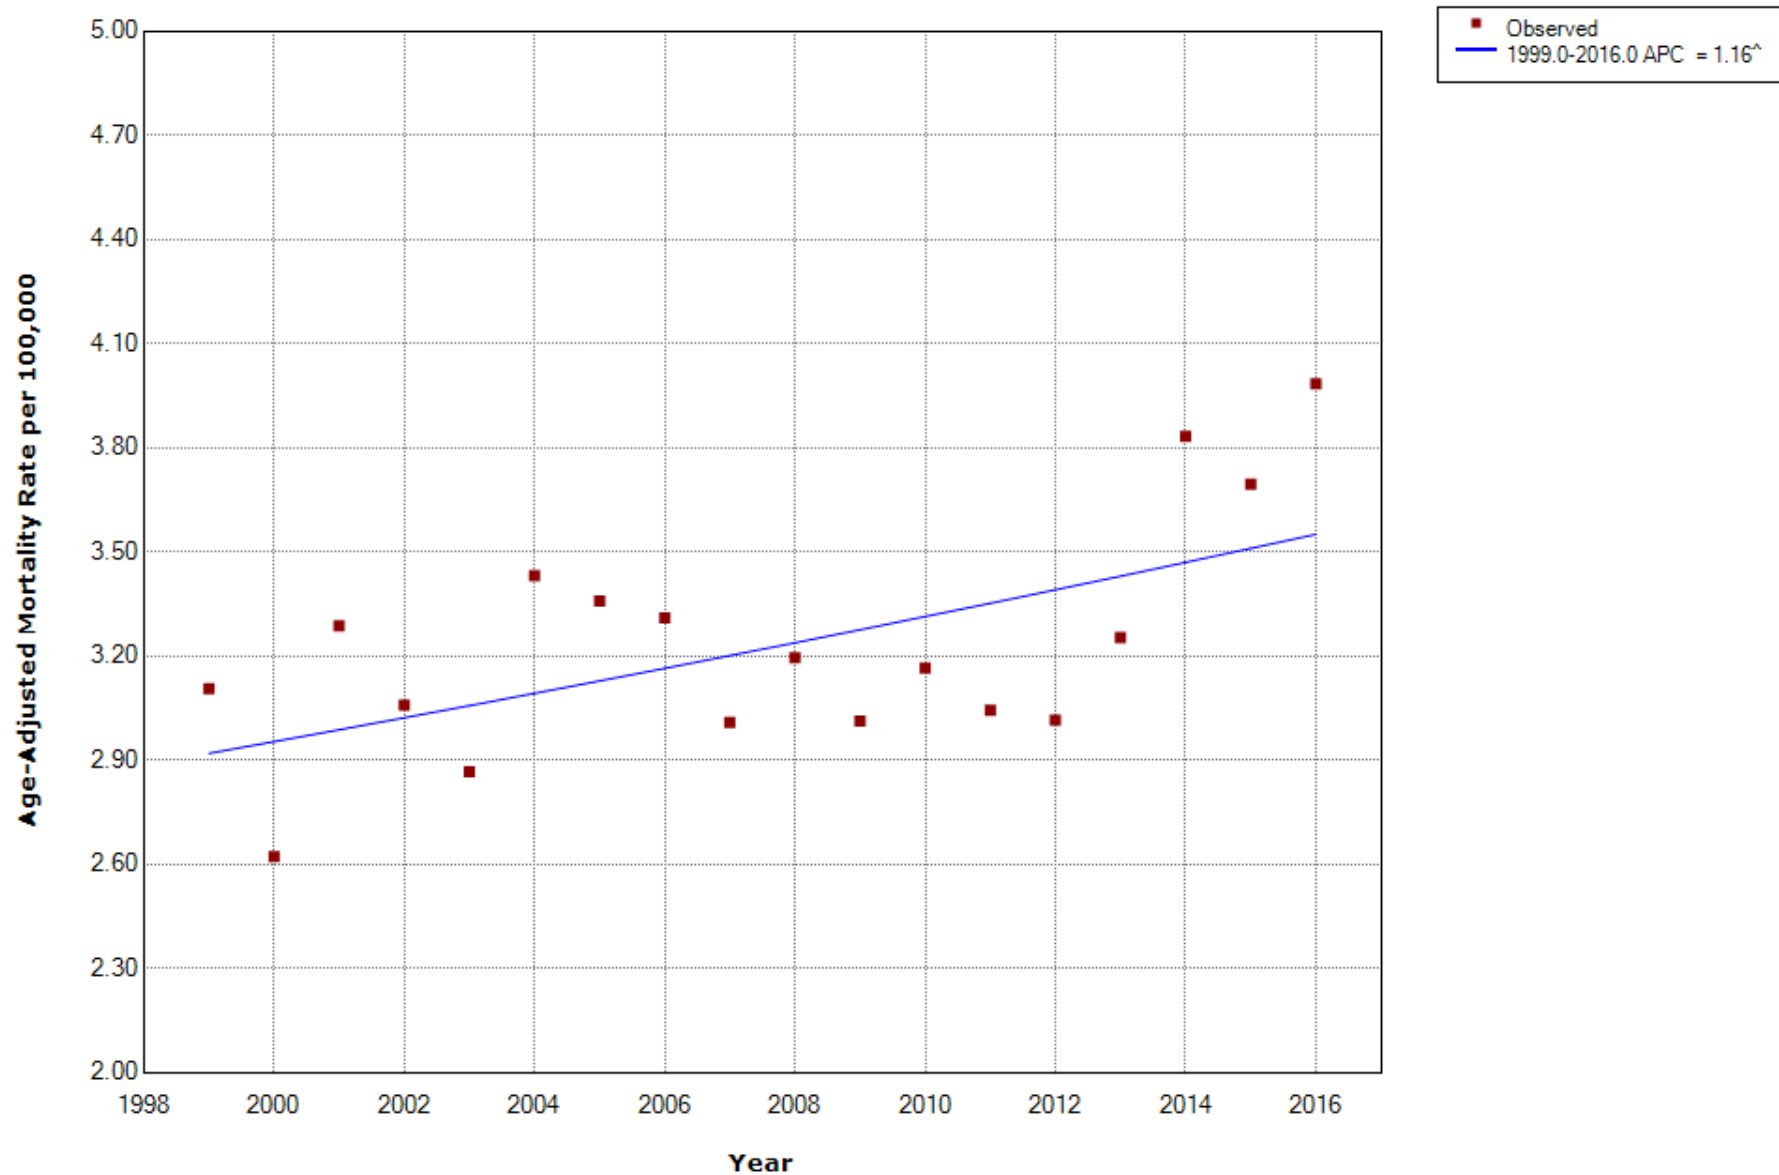

^ Indicates that the Annual Percent Change (APC) is significantly different from zero at the alpha = 0.05 level.  
Final Selected Model: 0 Joinpoints.

### Hypertensive diseases (I10-I15) / NH Blacks: 1 Joinpoint

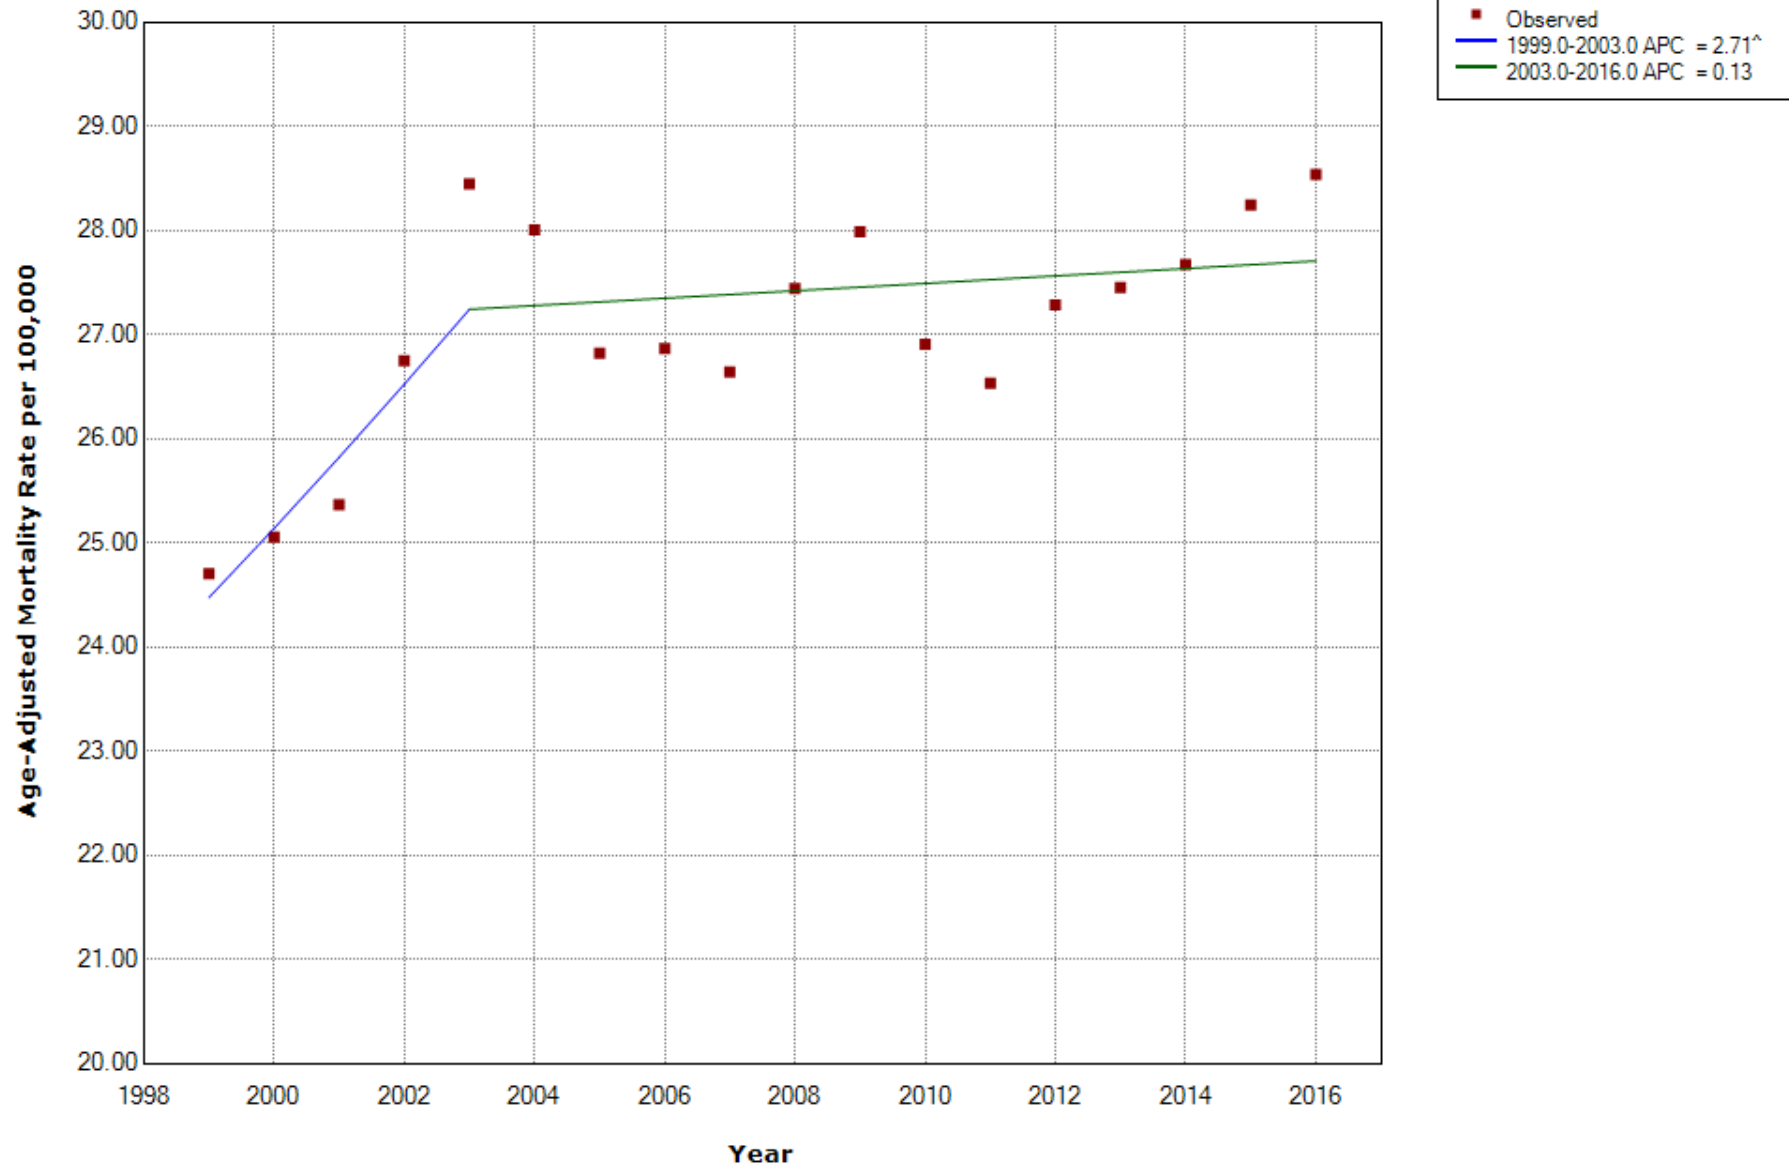

^ Indicates that the Annual Percent Change (APC) is significantly different from zero at the alpha = 0.05 level.  
Final Selected Model: 1 Joinpoint.

### Hypertensive diseases (I10-I15) / NH whites: 1 Joinpoint

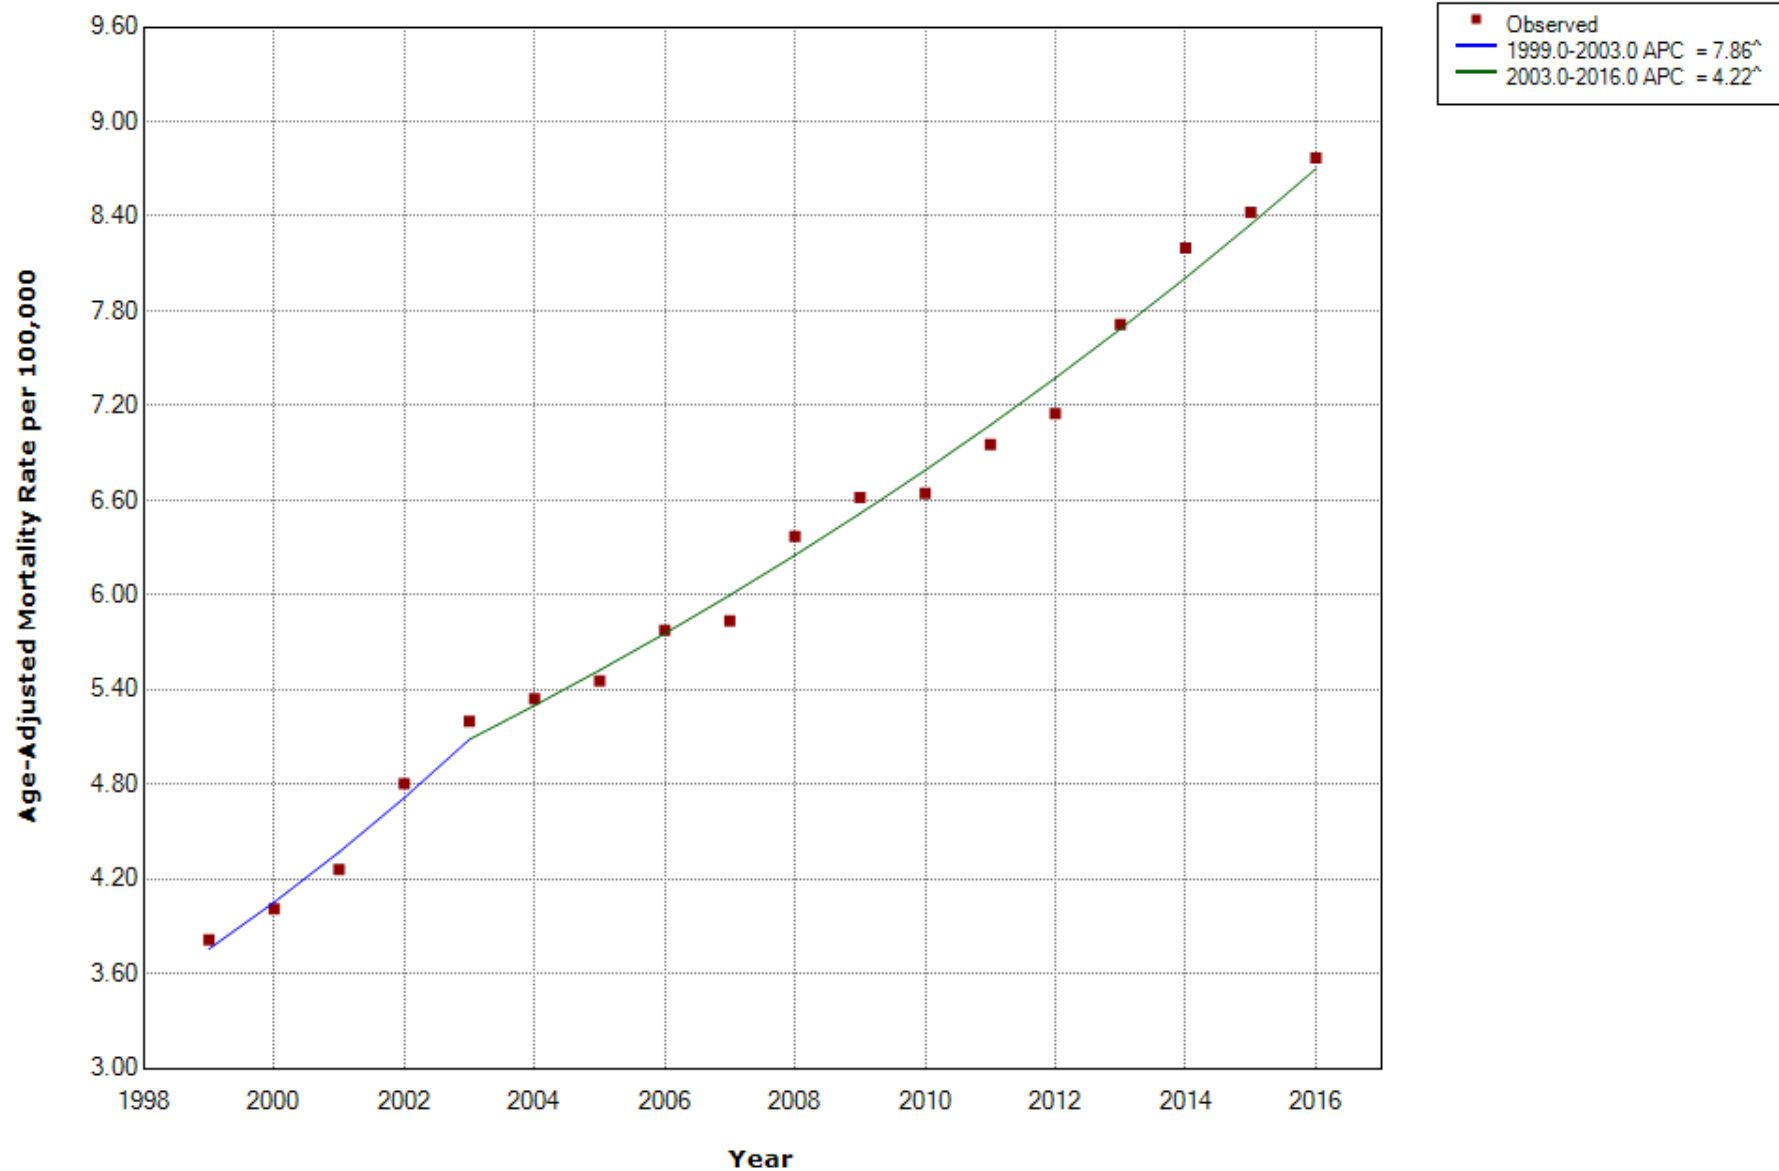

^ Indicates that the Annual Percent Change (APC) is significantly different from zero at the alpha = 0.05 level.  
Final Selected Model: 1 Joinpoint.

### Hypertensive diseases (I10-I15) / Hispanics: 1 Joinpoint

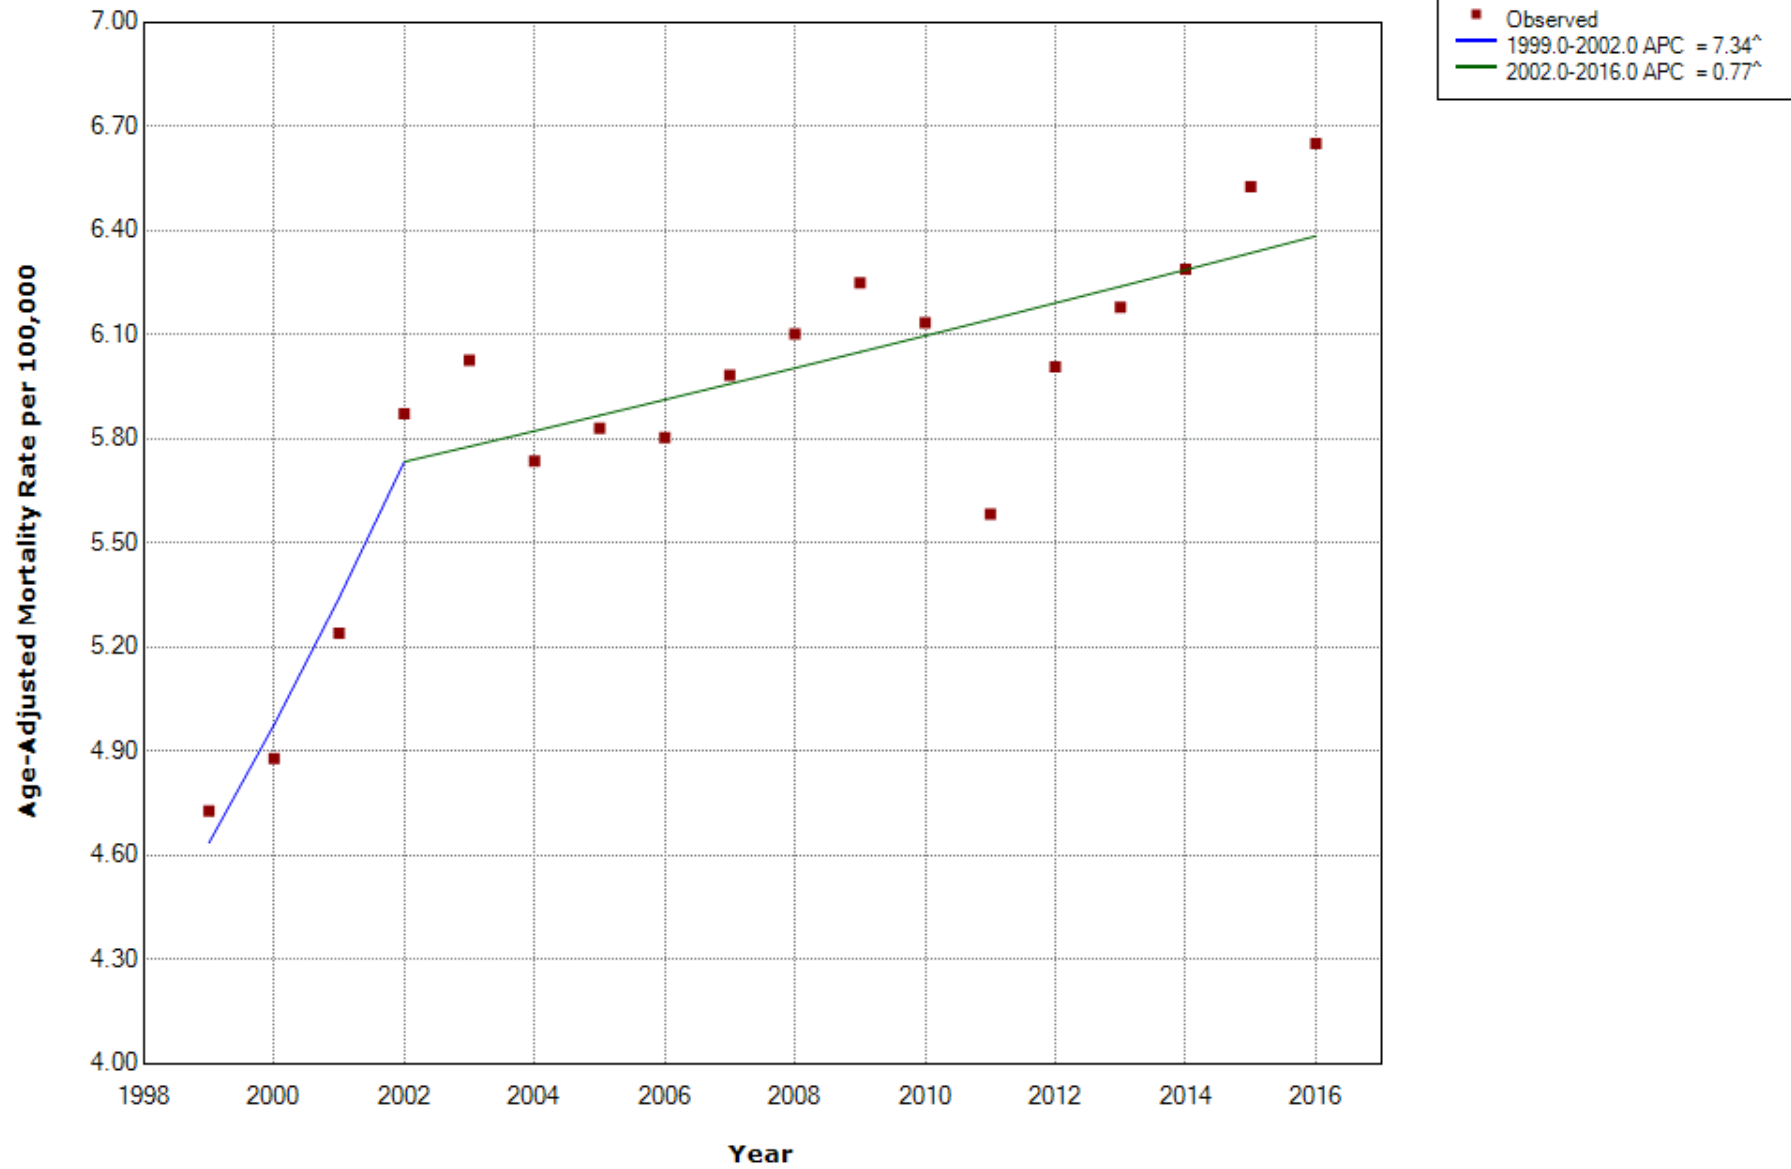

^ Indicates that the Annual Percent Change (APC) is significantly different from zero at the alpha = 0.05 level.  
Final Selected Model: 1 Joinpoint.

### Arrhythmias, heart failure, and other forms of heart disease (I30-I51) / NH AIAN: 0 Joinpoints

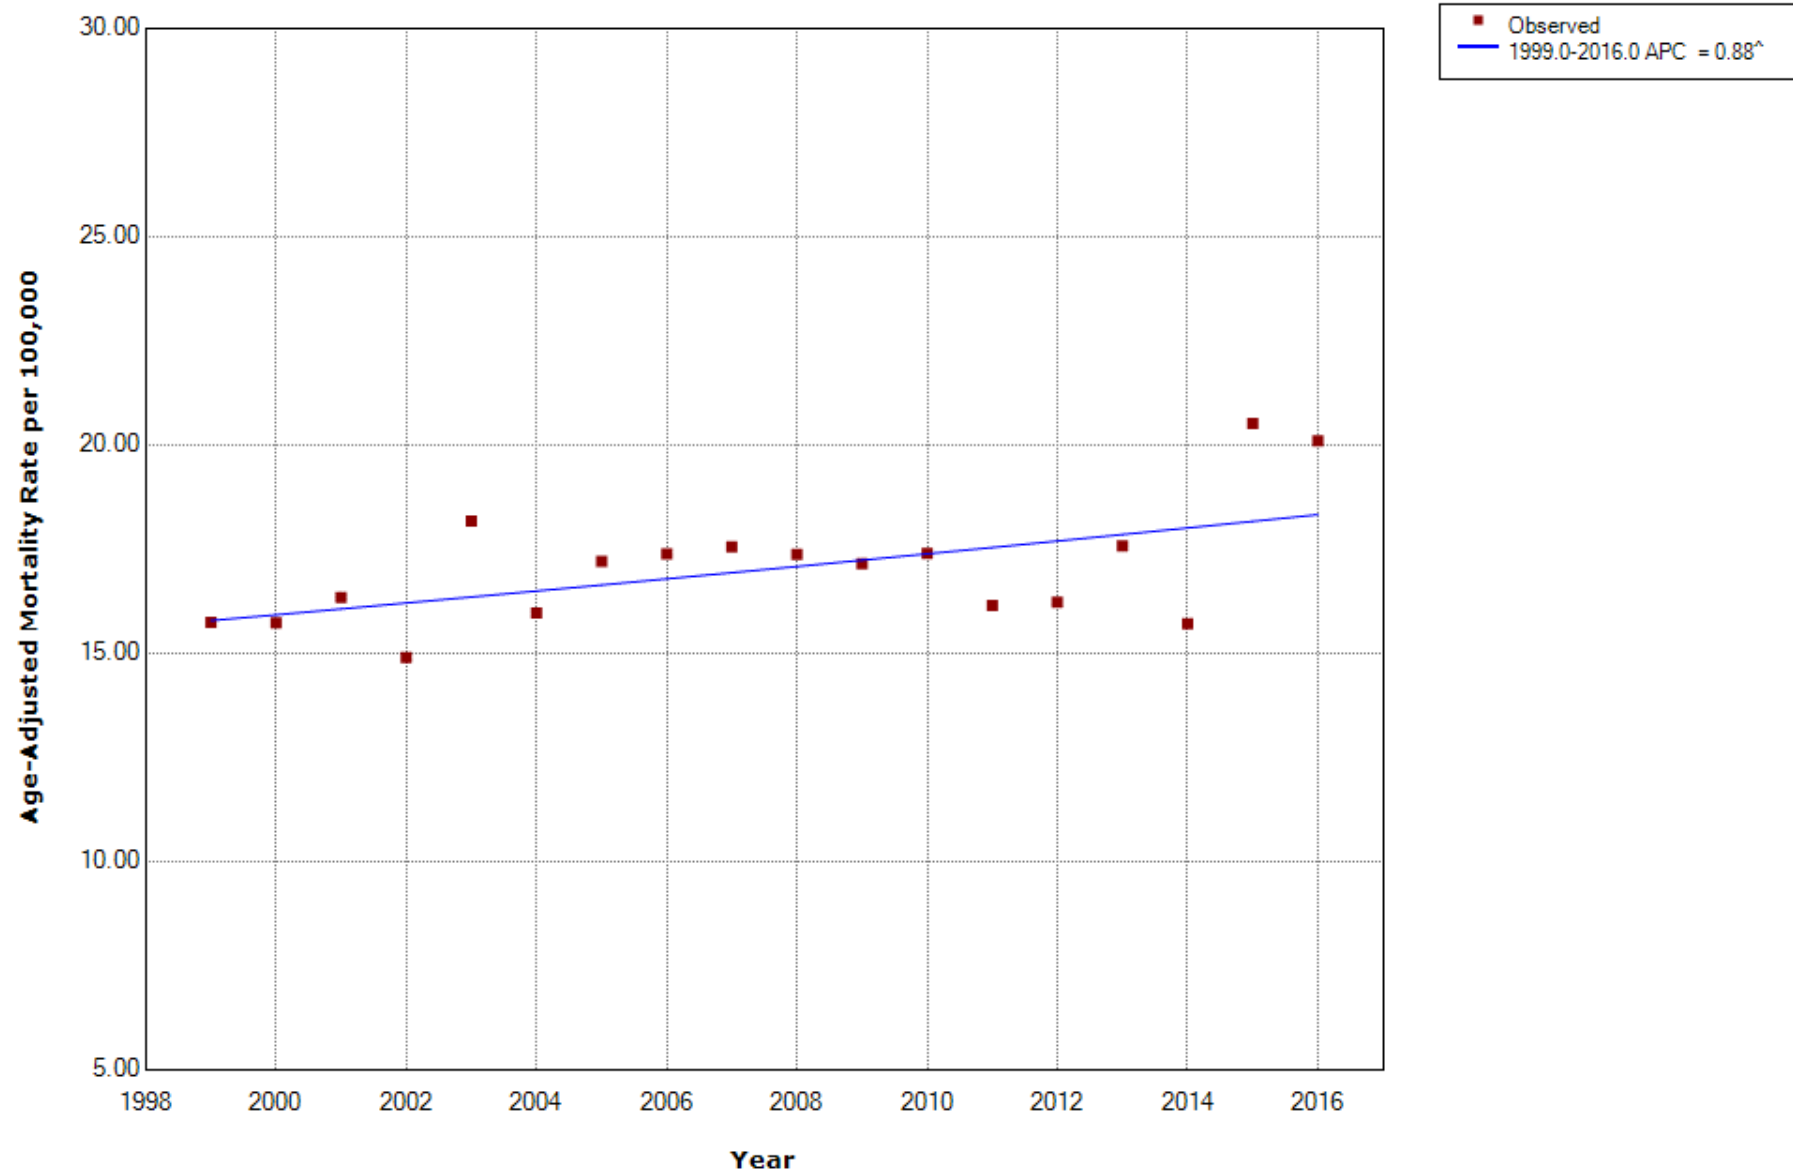

^ Indicates that the Annual Percent Change (APC) is significantly different from zero at the alpha = 0.05 level.  
Final Selected Model: 0 Joinpoints.

### Arrhythmias, heart failure, and other forms of heart disease (I30-I51) / NH API: 0 Joinpoints

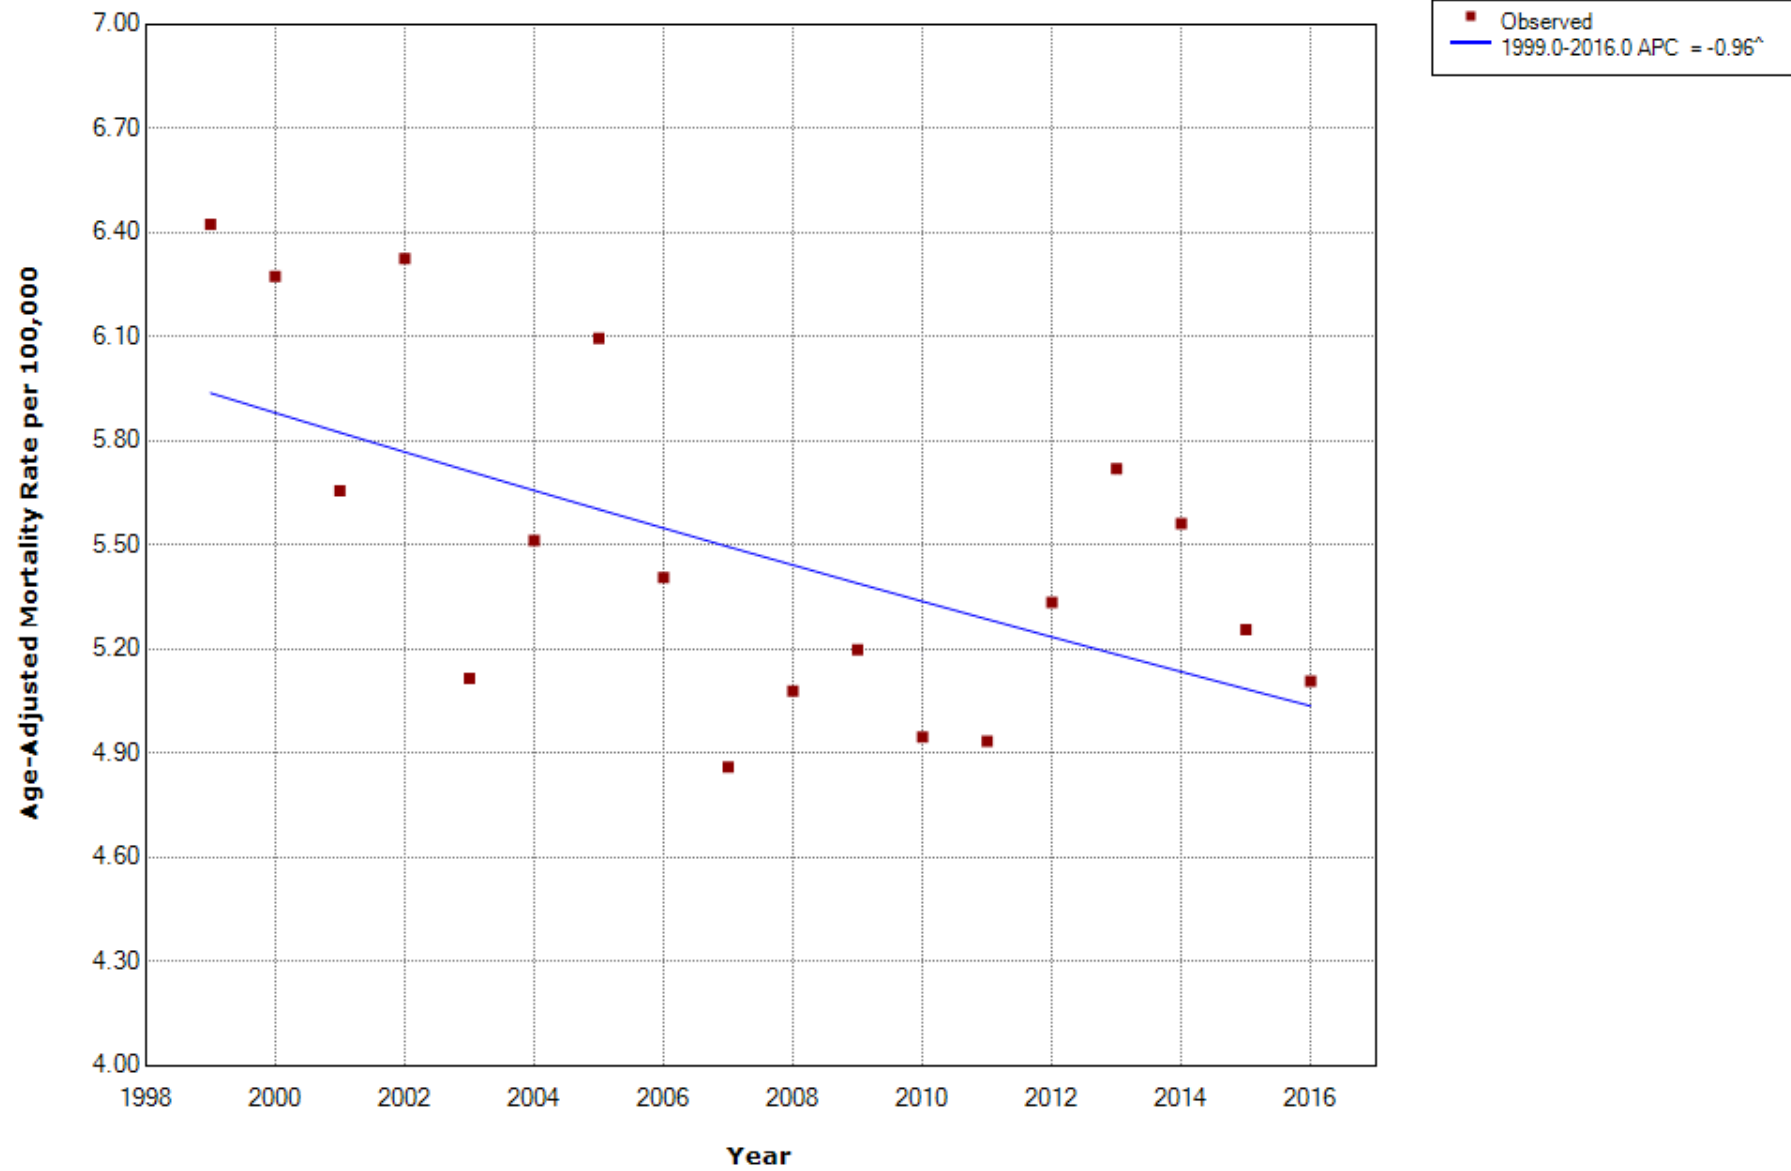

^ Indicates that the Annual Percent Change (APC) is significantly different from zero at the alpha = 0.05 level.  
Final Selected Model: 0 Joinpoints.

### Arrhythmias, heart failure, and other forms of heart disease (I30-I51) / NH Blacks: 2 Joinpoints

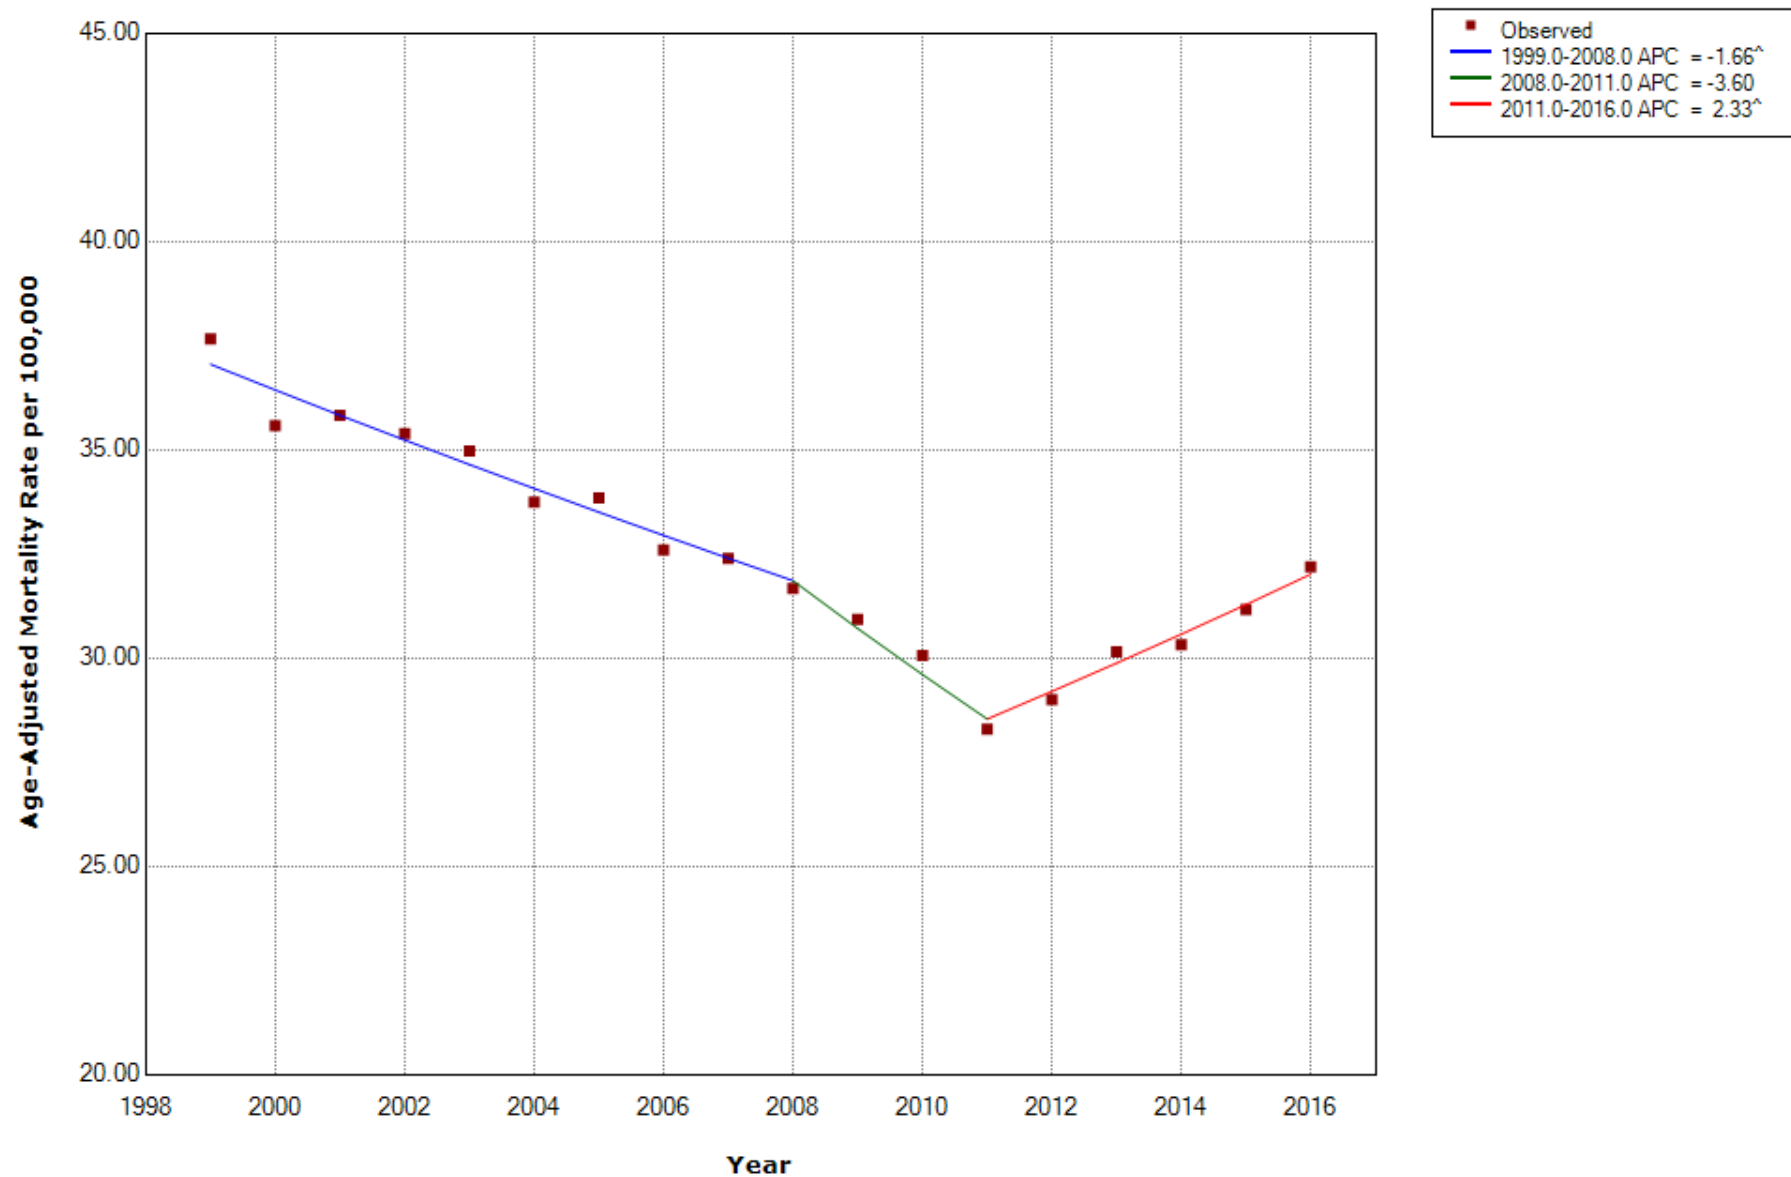

<sup>^</sup> Indicates that the Annual Percent Change (APC) is significantly different from zero at the alpha = 0.05 level.  
Final Selected Model: 2 Joinpoints.

### Arrhythmias, heart failure, and other forms of heart disease (I30-I51) / NH whites: 2 Joinpoints

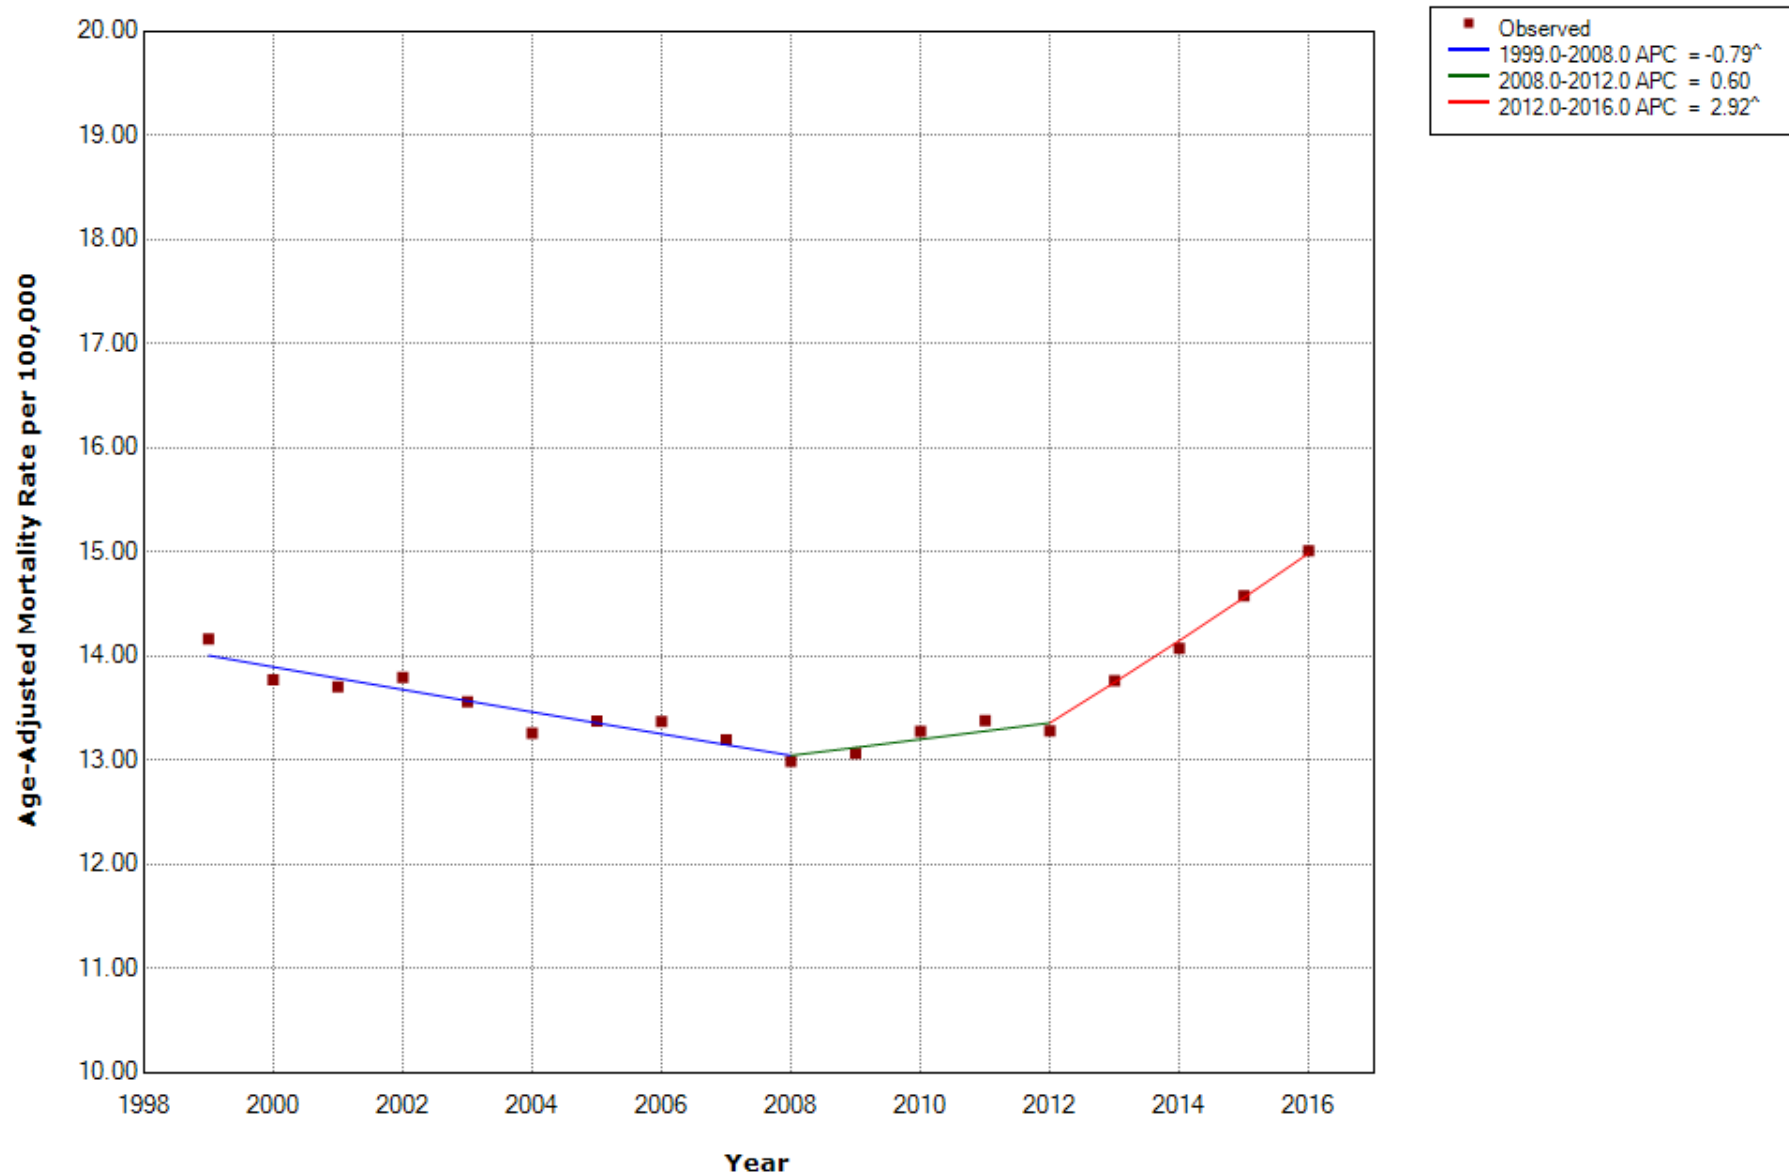

^ Indicates that the Annual Percent Change (APC) is significantly different from zero at the alpha = 0.05 level.  
Final Selected Model: 2 Joinpoints.



### Arrhythmias, heart failure, and other forms of heart disease (I30-I51) / Hispanics: 0 Joinpoints

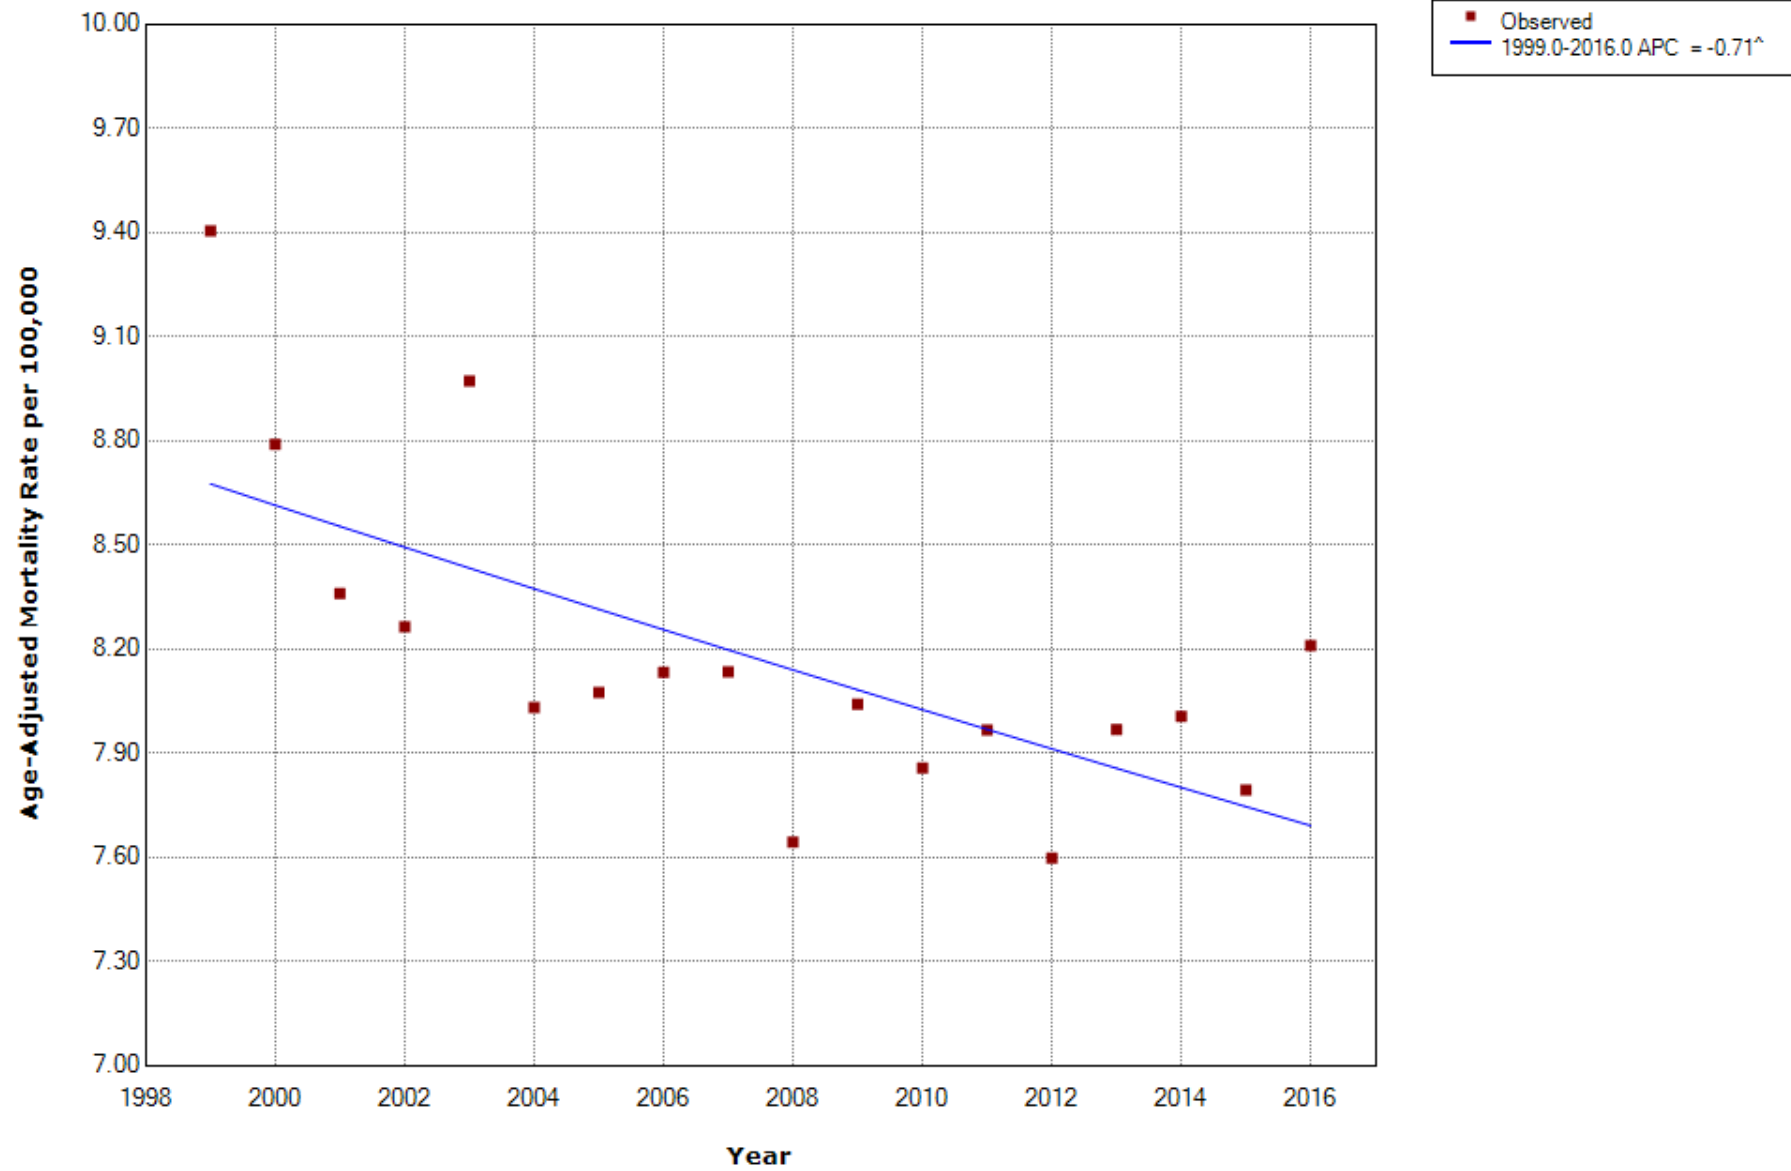

^ Indicates that the Annual Percent Change (APC) is significantly different from zero at the alpha = 0.05 level.  
Final Selected Model: 0 Joinpoints.

Diseases of veins, lymphatic vessels and lymph nodes (I80-I89) / NH AIAN: Observed

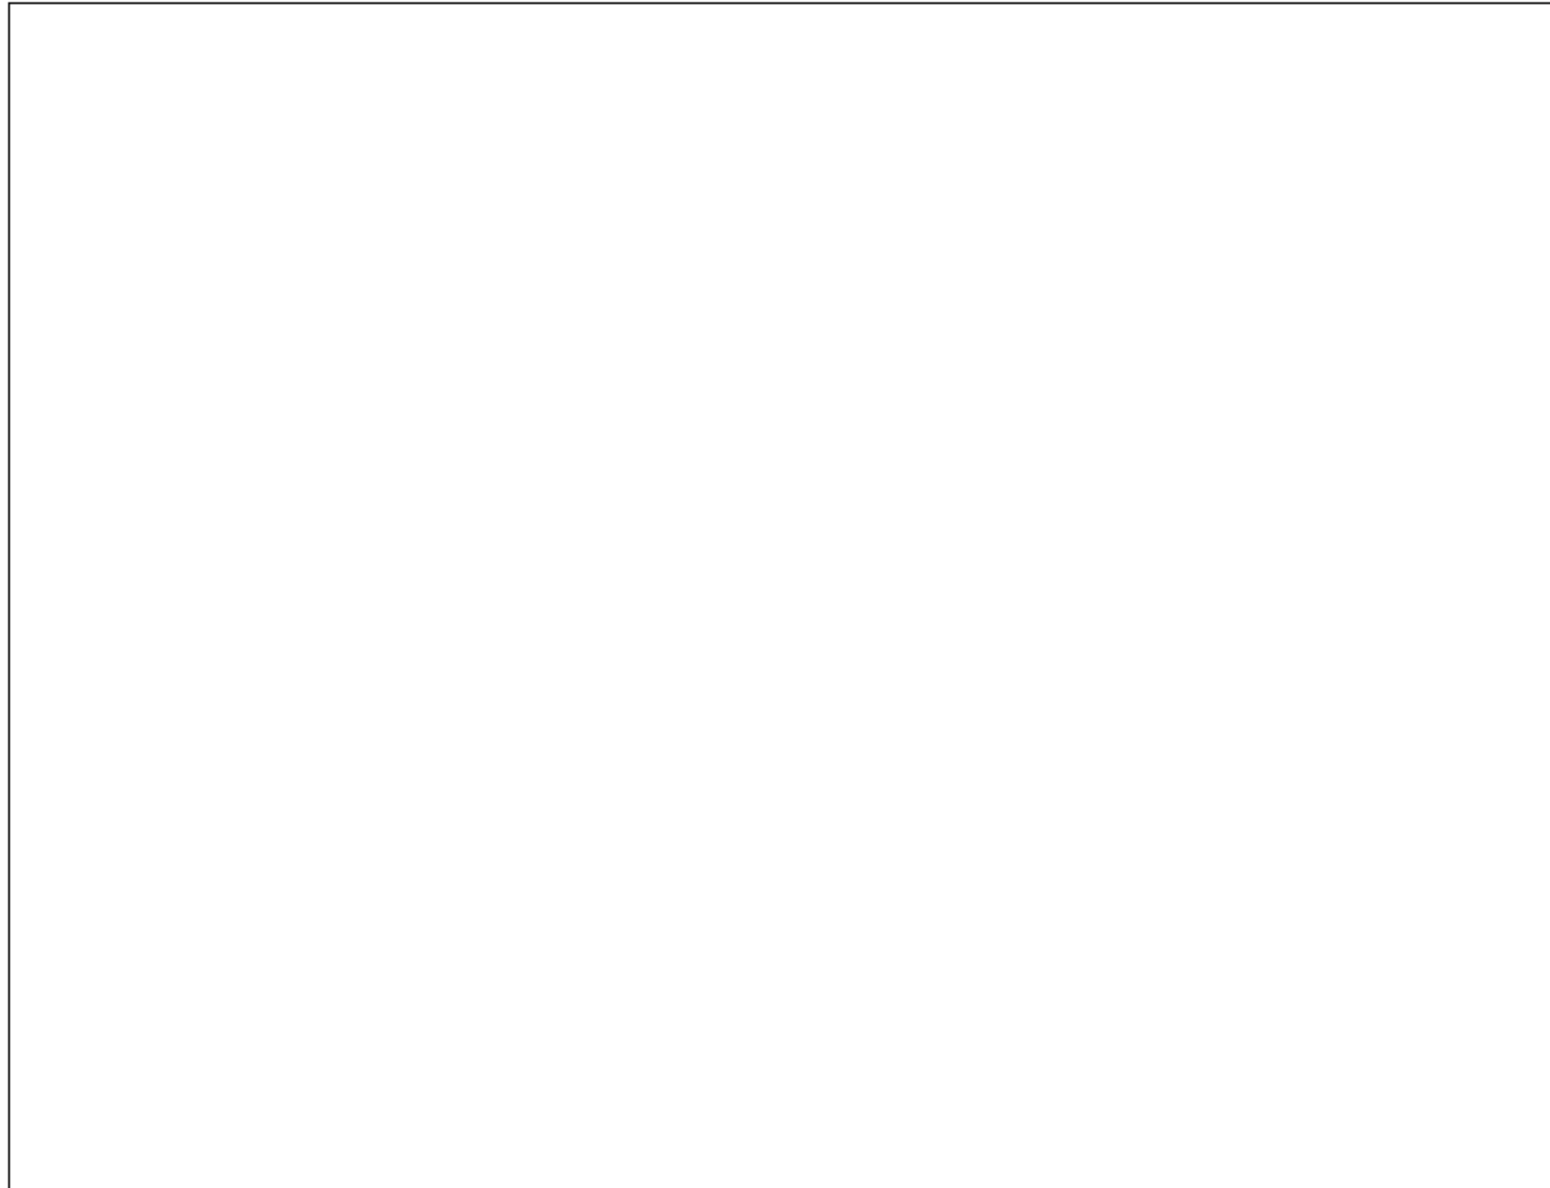

■ Observed

^ Indicates that the Annual Percent Change (APC) is significantly different from zero at the alpha = 0.05 level.

\*\* Joinpoint cannot process records with missing dependent variable values. Joinpoint will not analyze by-groups that have this error. (Row = 900, Col = 1)

### Diseases of veins, lymphatic vessels and lymph nodes (I80-I89) / NH API: Observed

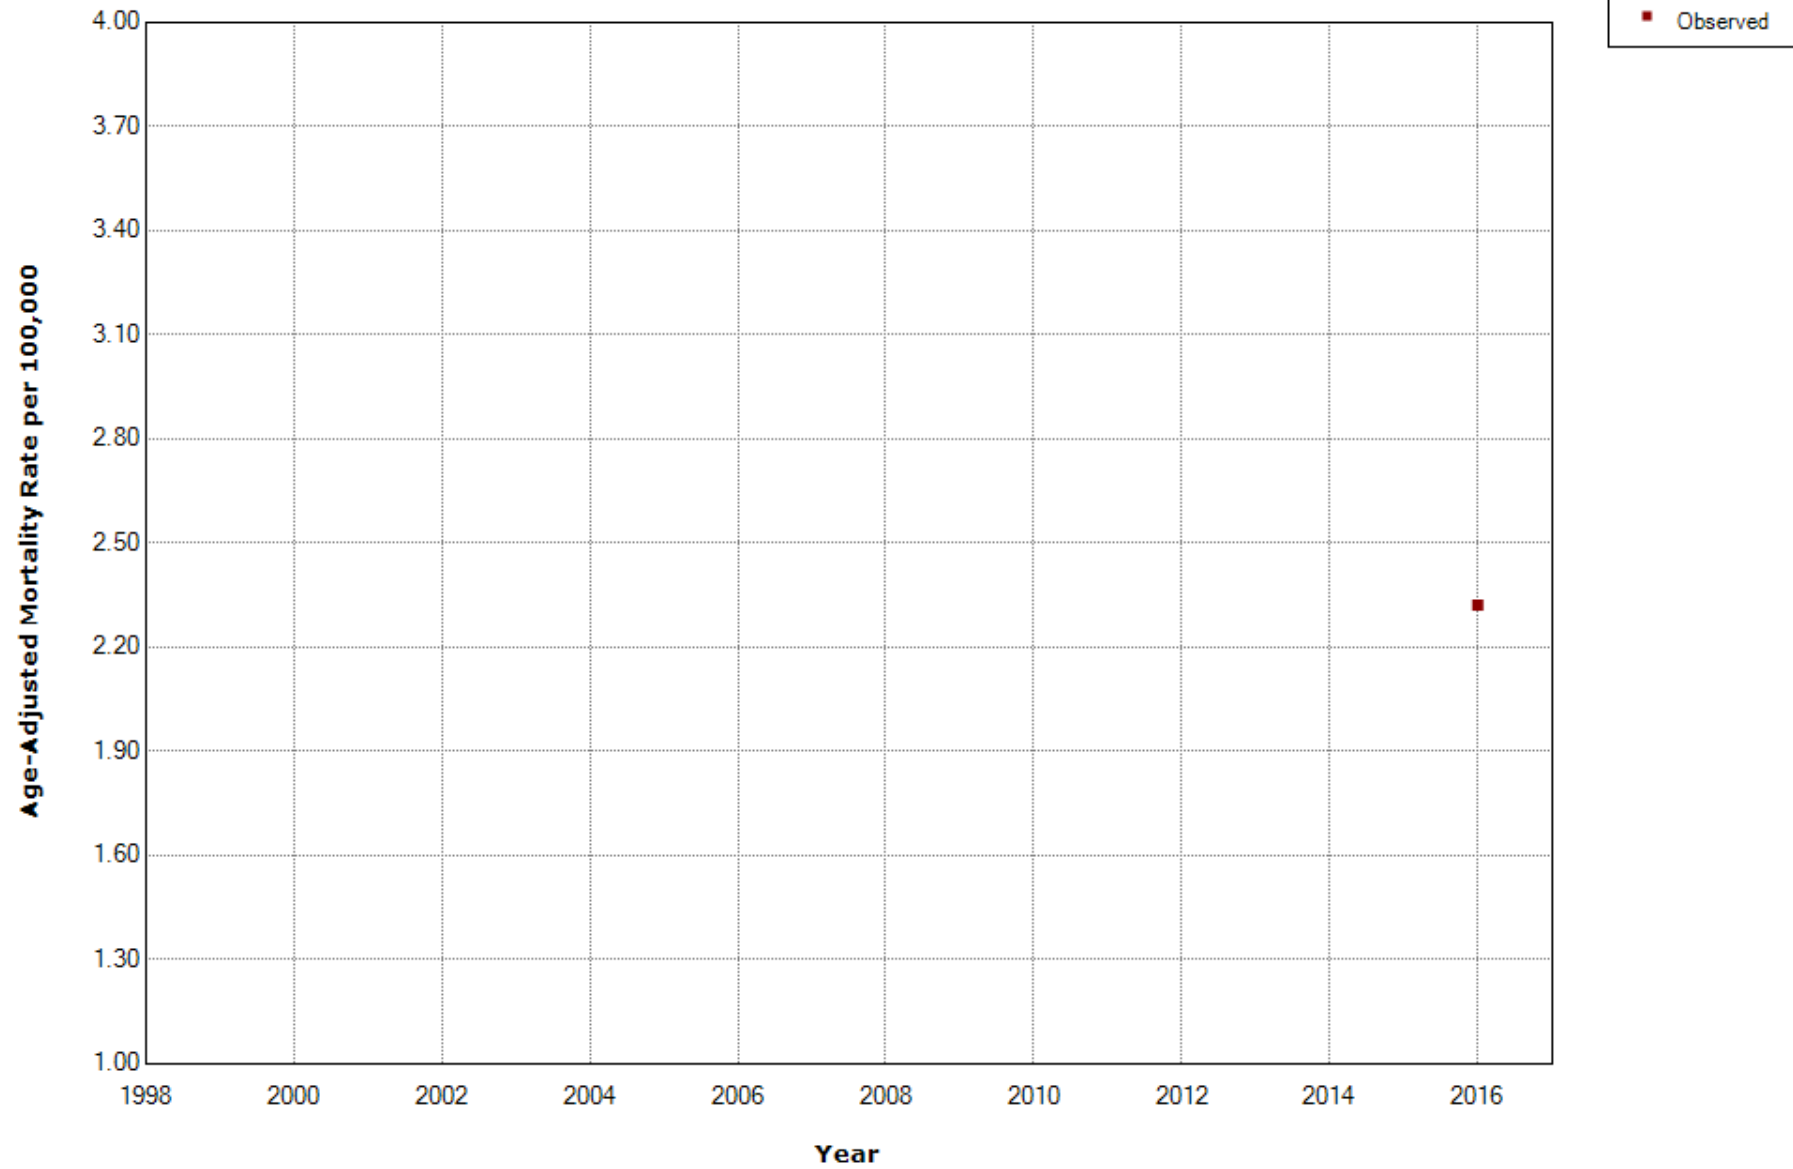

^ Indicates that the Annual Percent Change (APC) is significantly different from zero at the alpha = 0.05 level.

\* Joinpoint cannot process records with missing dependent variable values. Joinpoint will not analyze by-groups that have this error. (Row = 918, Col = 1)

Diseases of veins, lymphatic vessels and lymph nodes (I80-I89) / NH Blacks: 0 Joinpoints

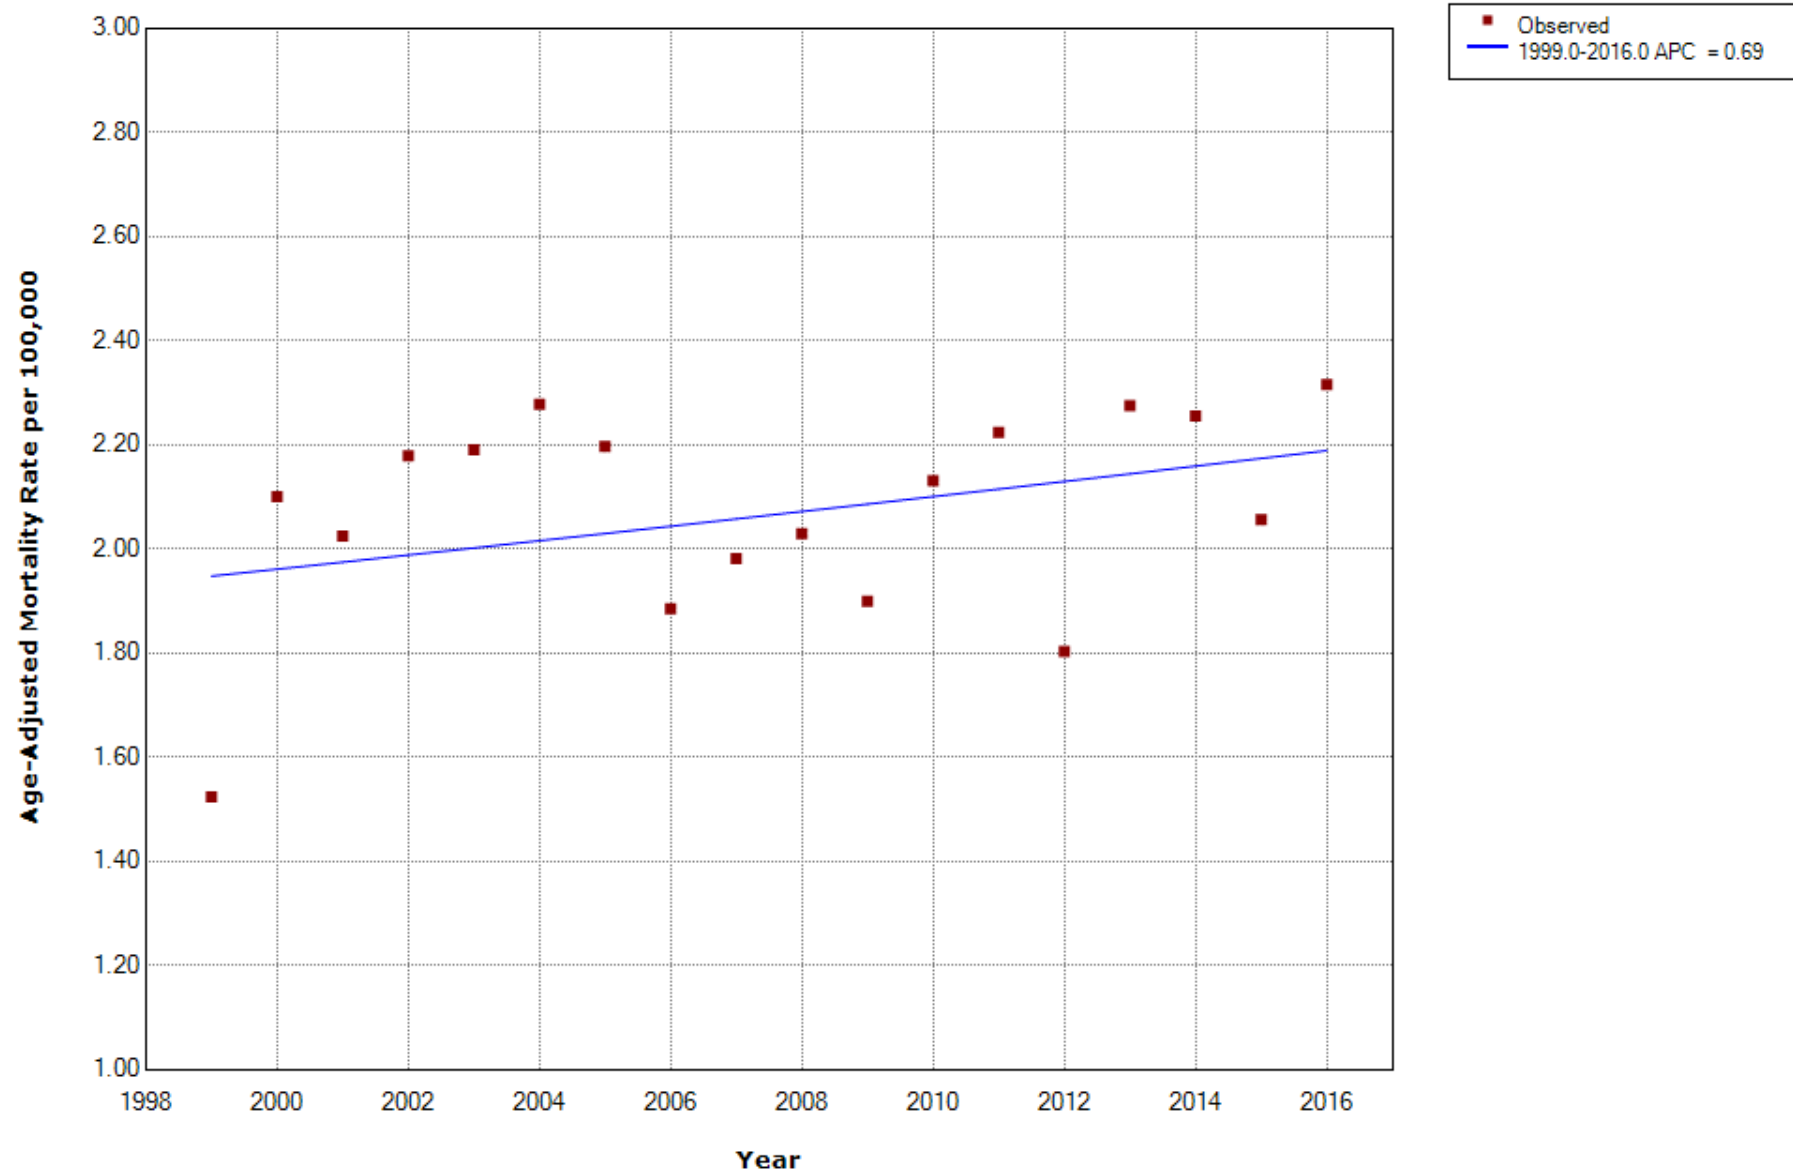

^ Indicates that the Annual Percent Change (APC) is significantly different from zero at the alpha = 0.05 level.  
Final Selected Model: 0 Joinpoints.

Diseases of veins, lymphatic vessels and lymph nodes (I80-I89) / NH whites: 0 Joinpoints

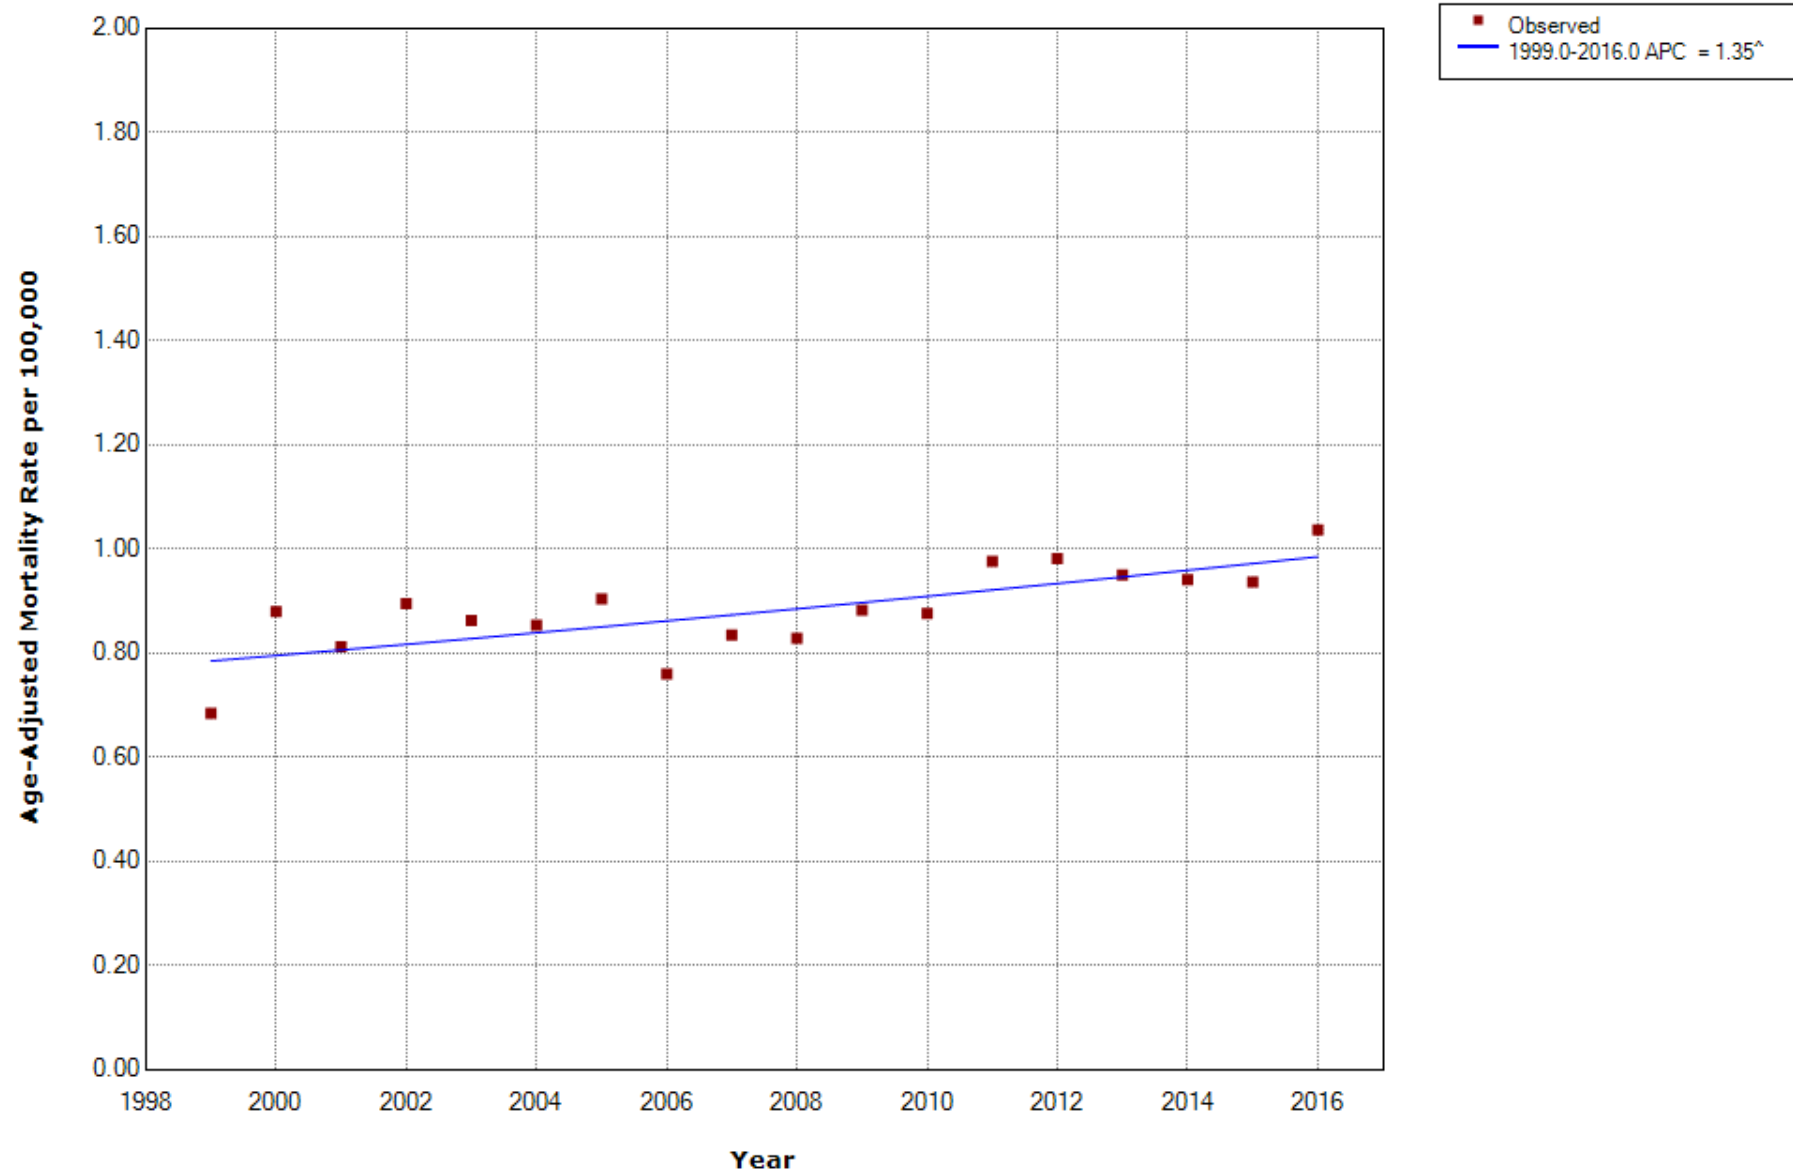

^ Indicates that the Annual Percent Change (APC) is significantly different from zero at the alpha = 0.05 level.  
Final Selected Model: 0 Joinpoints.

Diseases of veins, lymphatic vessels and lymph nodes (I80-I89) / Hispanics: 0 Joinpoints

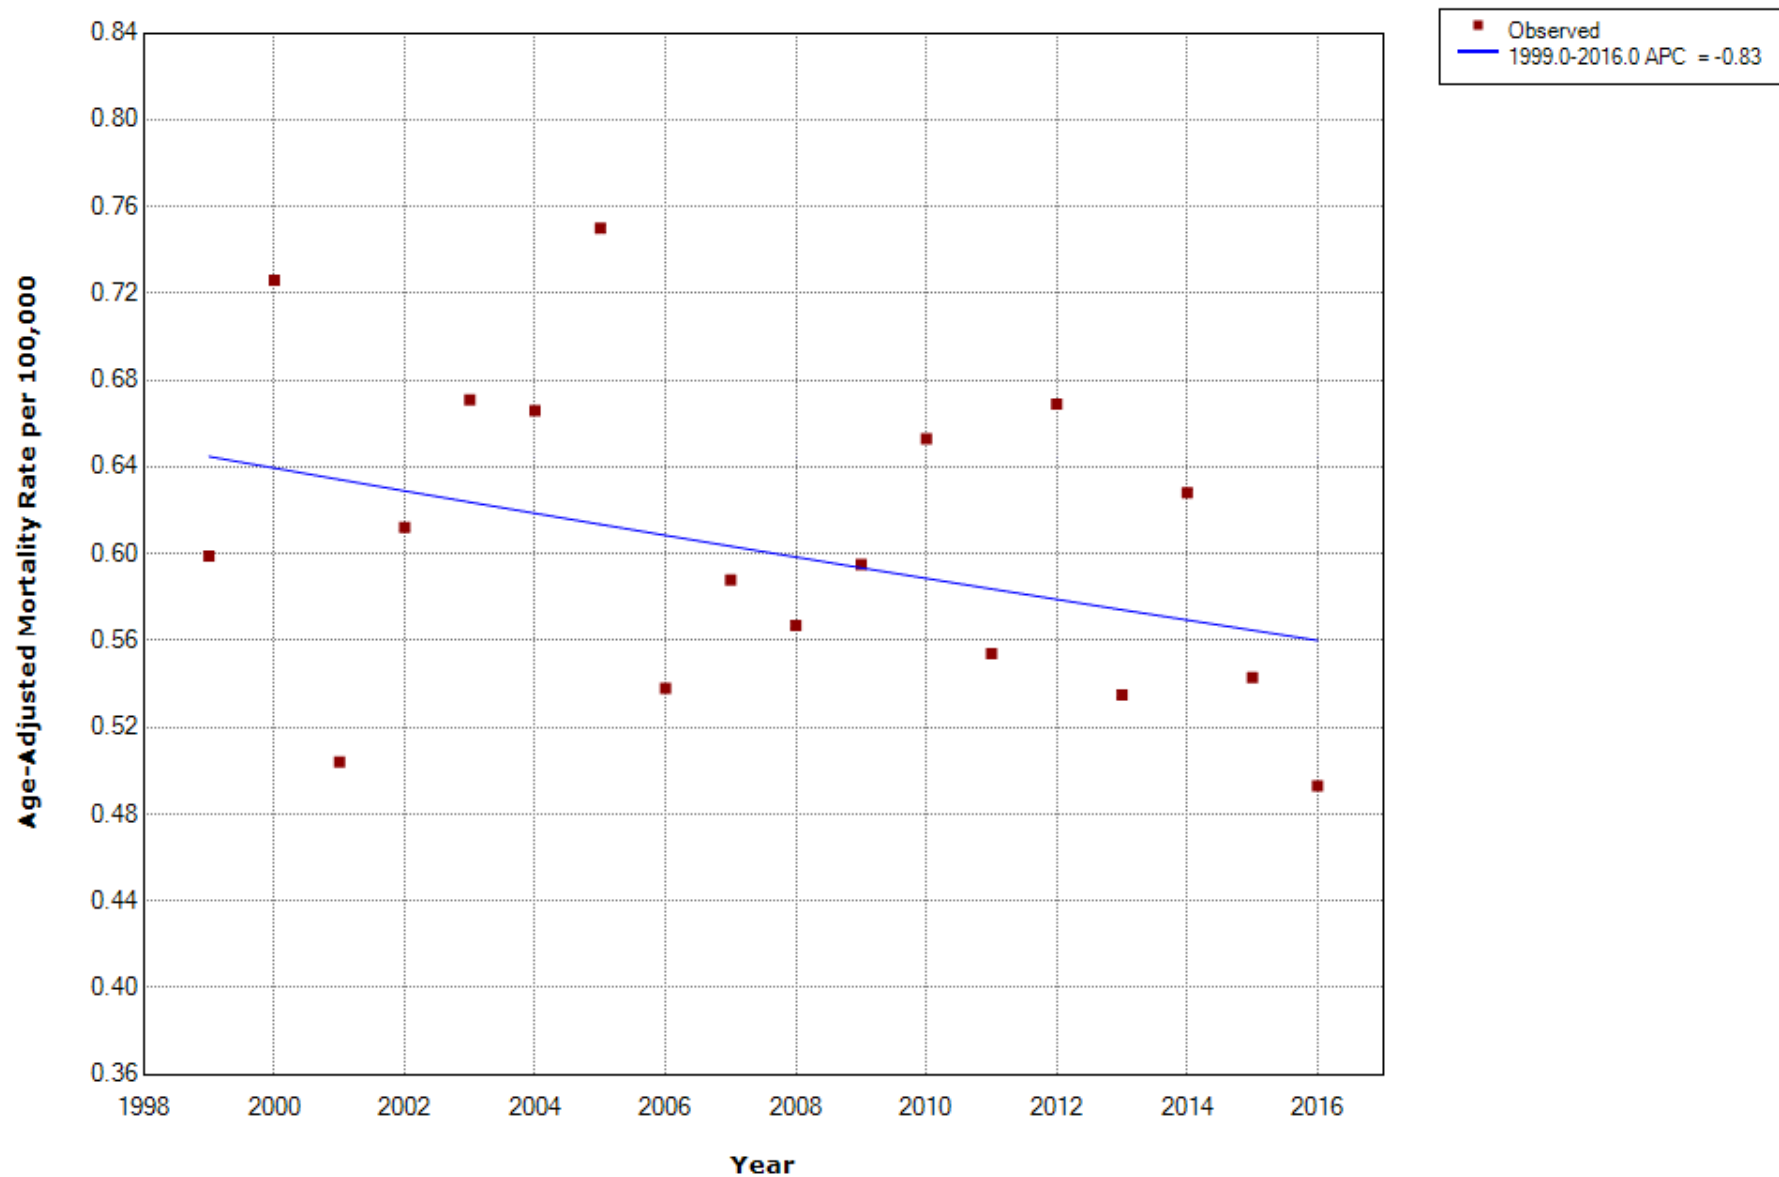

^ Indicates that the Annual Percent Change (APC) is significantly different from zero at the alpha = 0.05 level.  
Final Selected Model: 0 Joinpoints.

### Alcoholic liver disease (K70) / NH AIAN: 1 Joinpoint

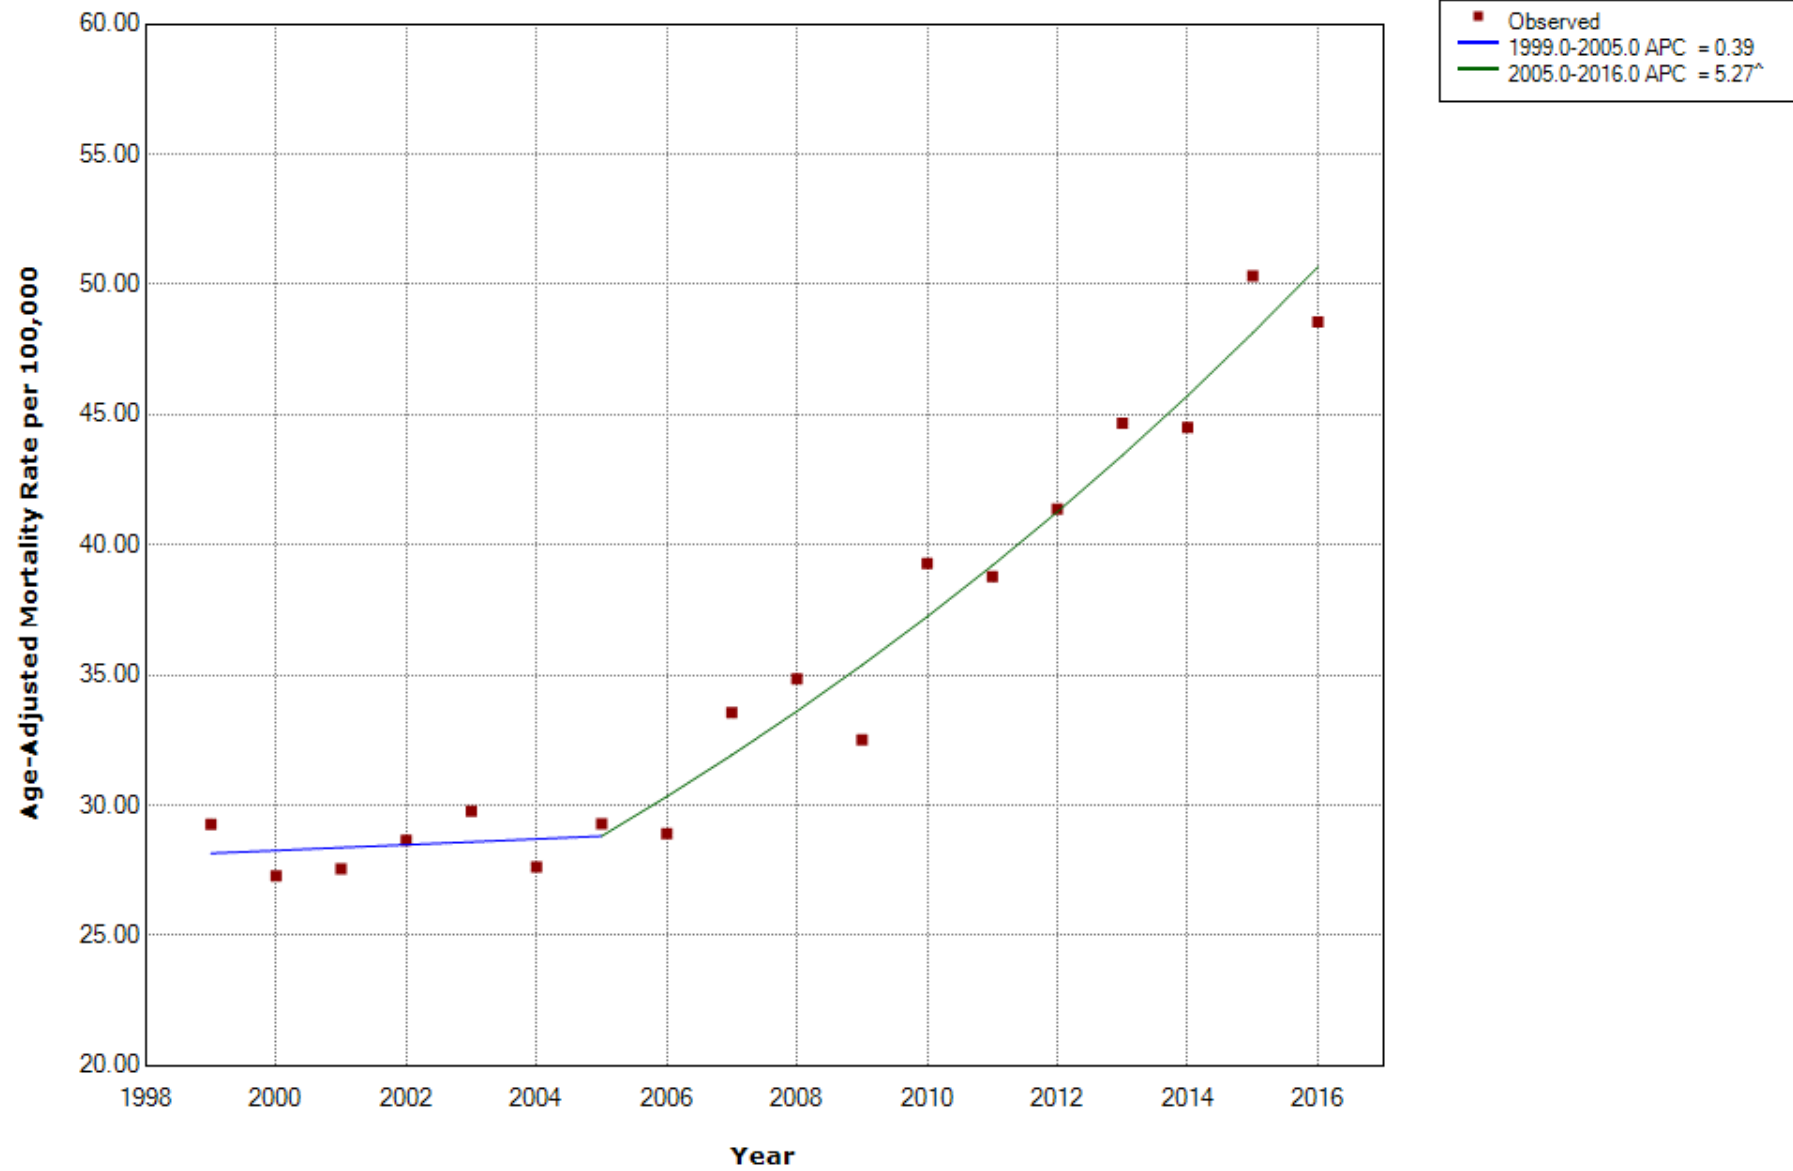

^ Indicates that the Annual Percent Change (APC) is significantly different from zero at the alpha = 0.05 level.  
Final Selected Model: 1 Joinpoint.

### Alcoholic liver disease (K70) / NH API: 0 Joinpoints

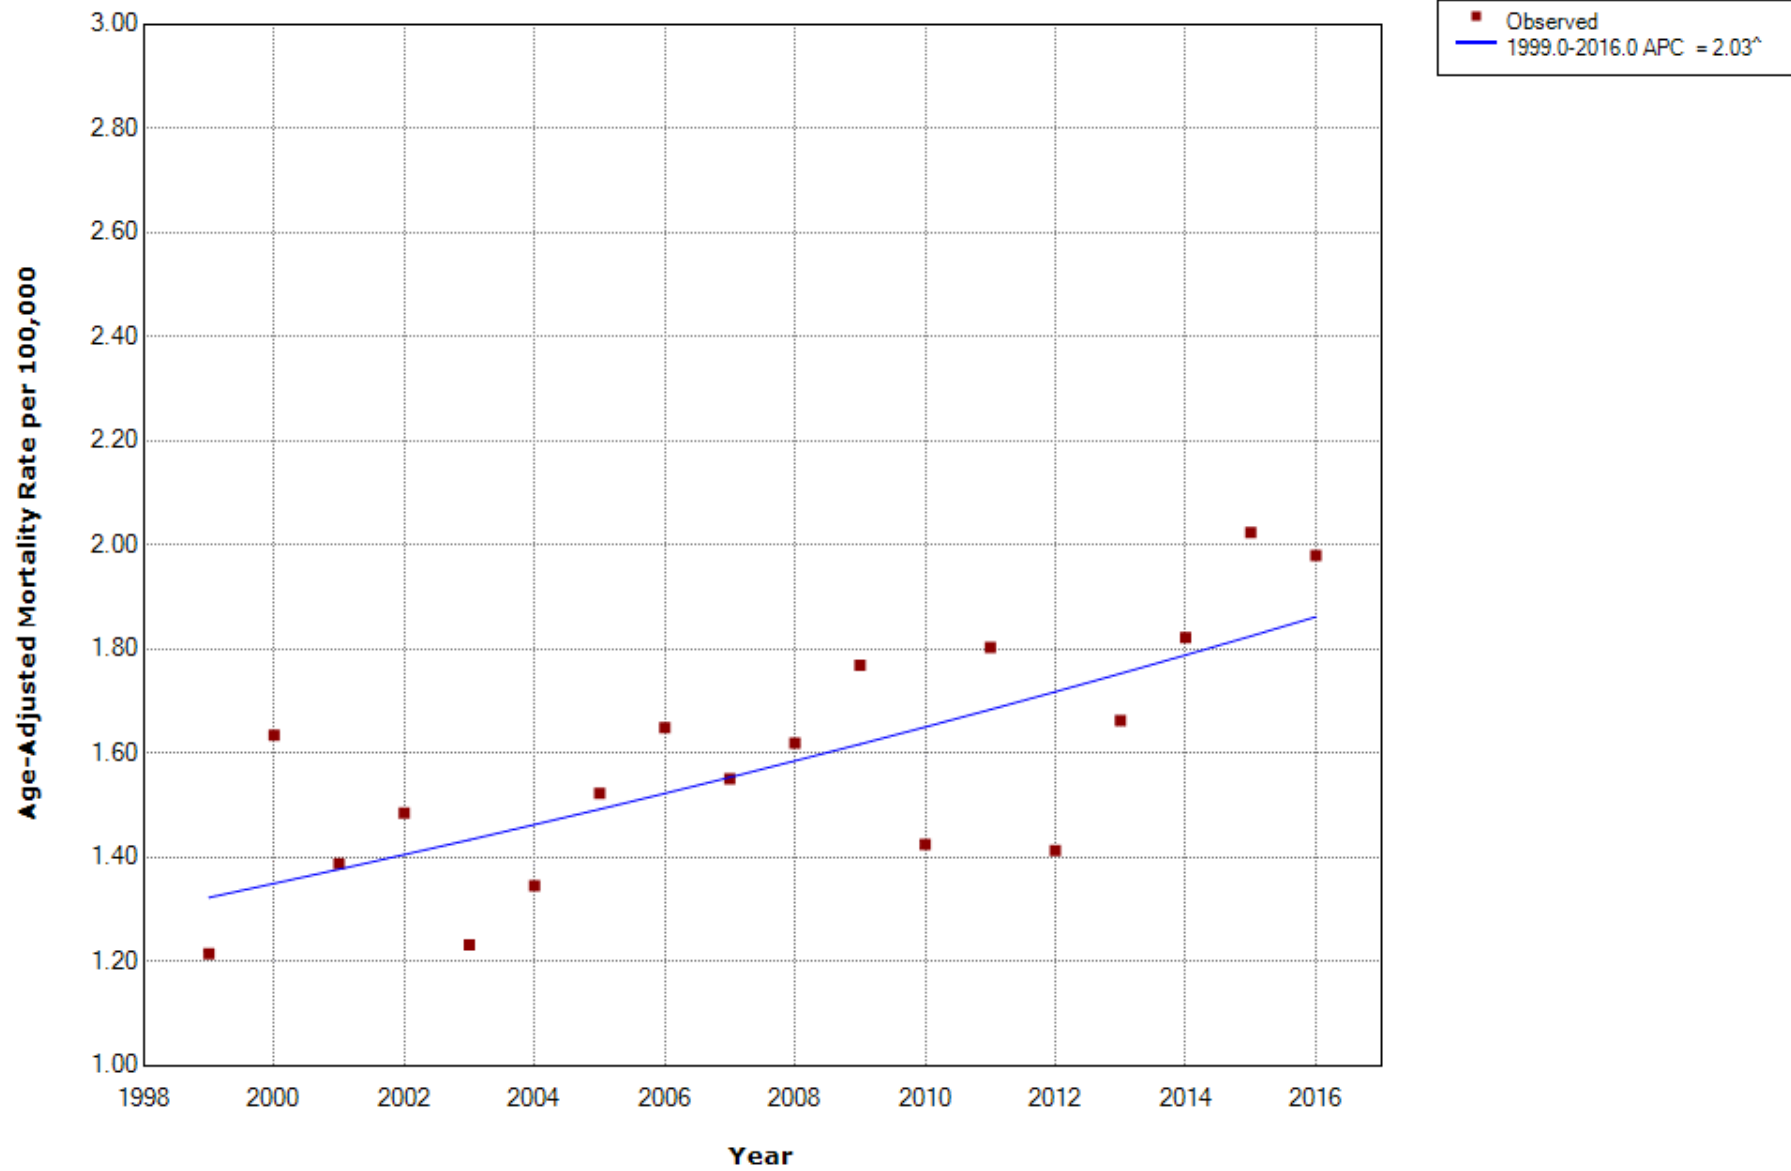

^ Indicates that the Annual Percent Change (APC) is significantly different from zero at the alpha = 0.05 level.  
Final Selected Model: 0 Joinpoints.



### Alcoholic liver disease (K70) / NH Blacks: 1 Joinpoint

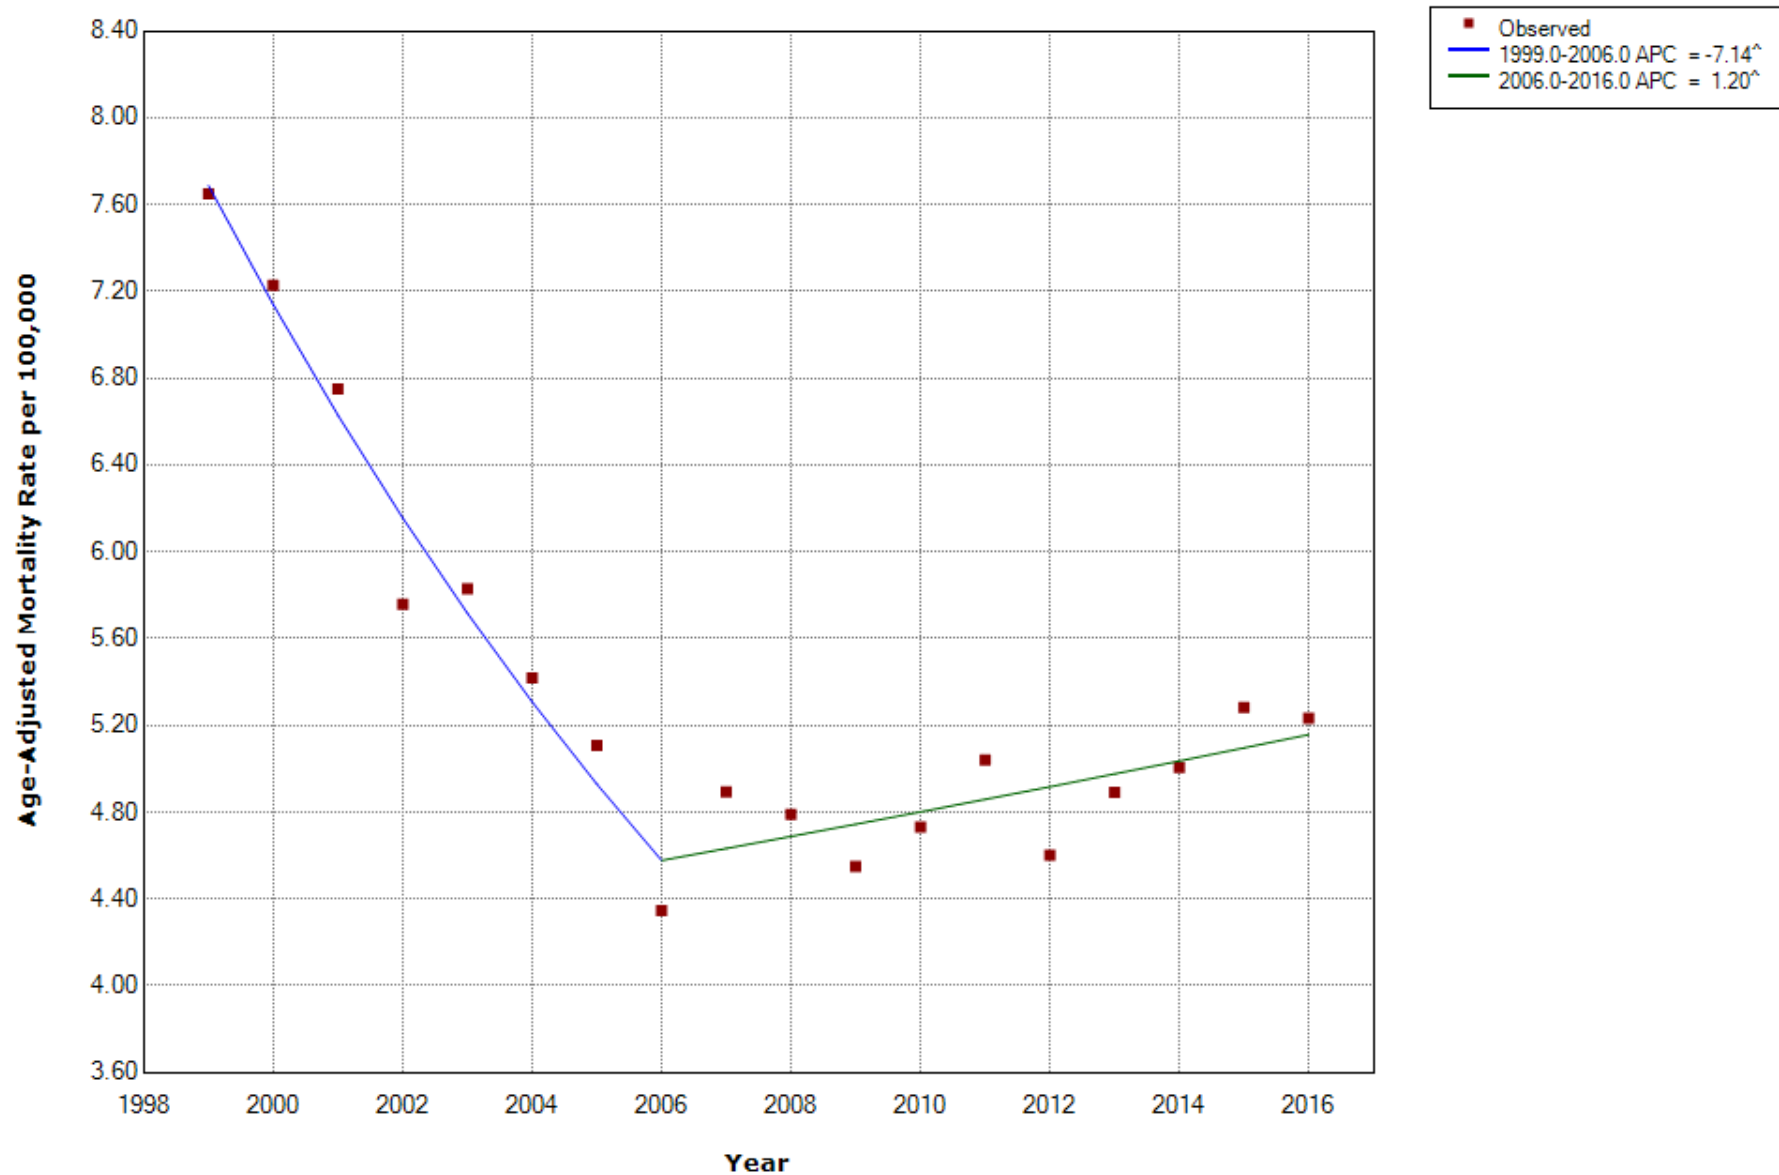

^ Indicates that the Annual Percent Change (APC) is significantly different from zero at the alpha = 0.05 level.  
Final Selected Model: 1 Joinpoint.

### Alcoholic liver disease (K70) / NH whites: 1 Joinpoint

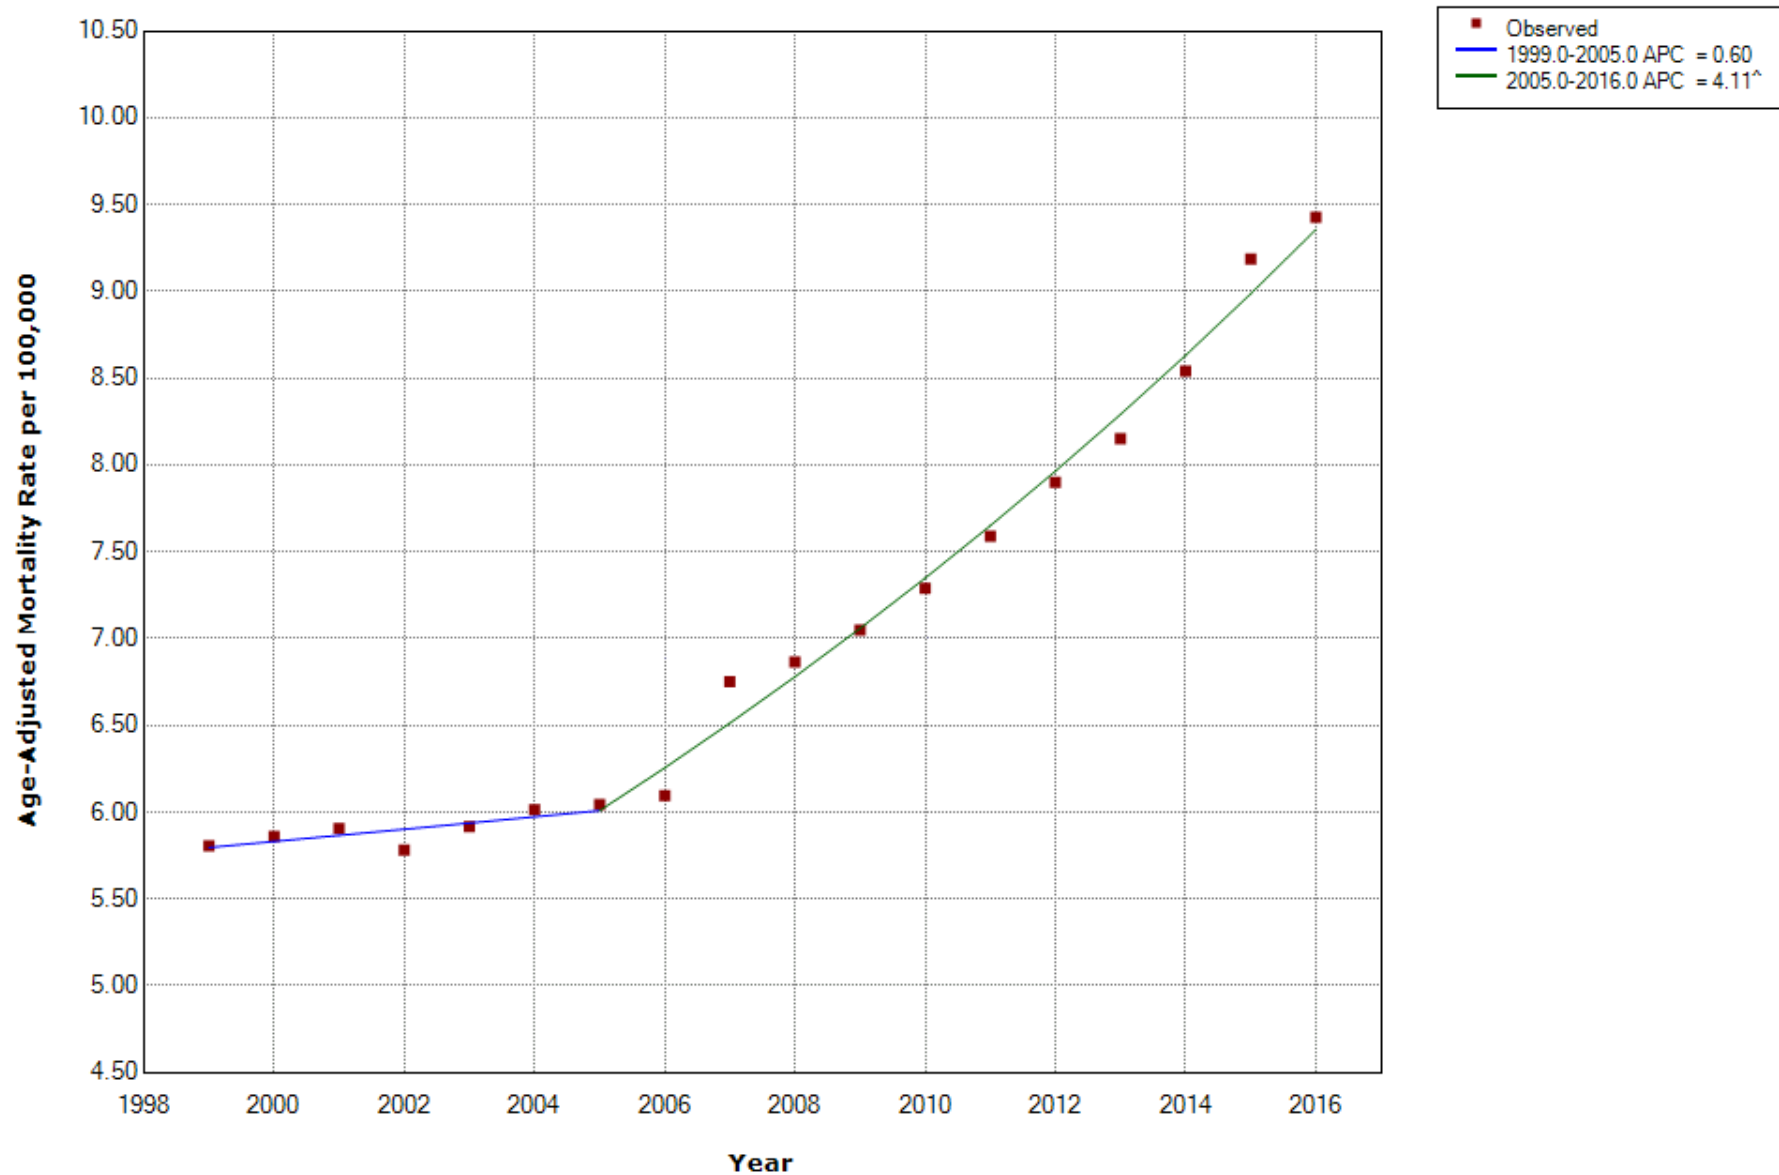

^ Indicates that the Annual Percent Change (APC) is significantly different from zero at the alpha = 0.05 level.  
Final Selected Model: 1 Joinpoint.

### Alcoholic liver disease (K70) / Hispanics: 2 Joinpoints

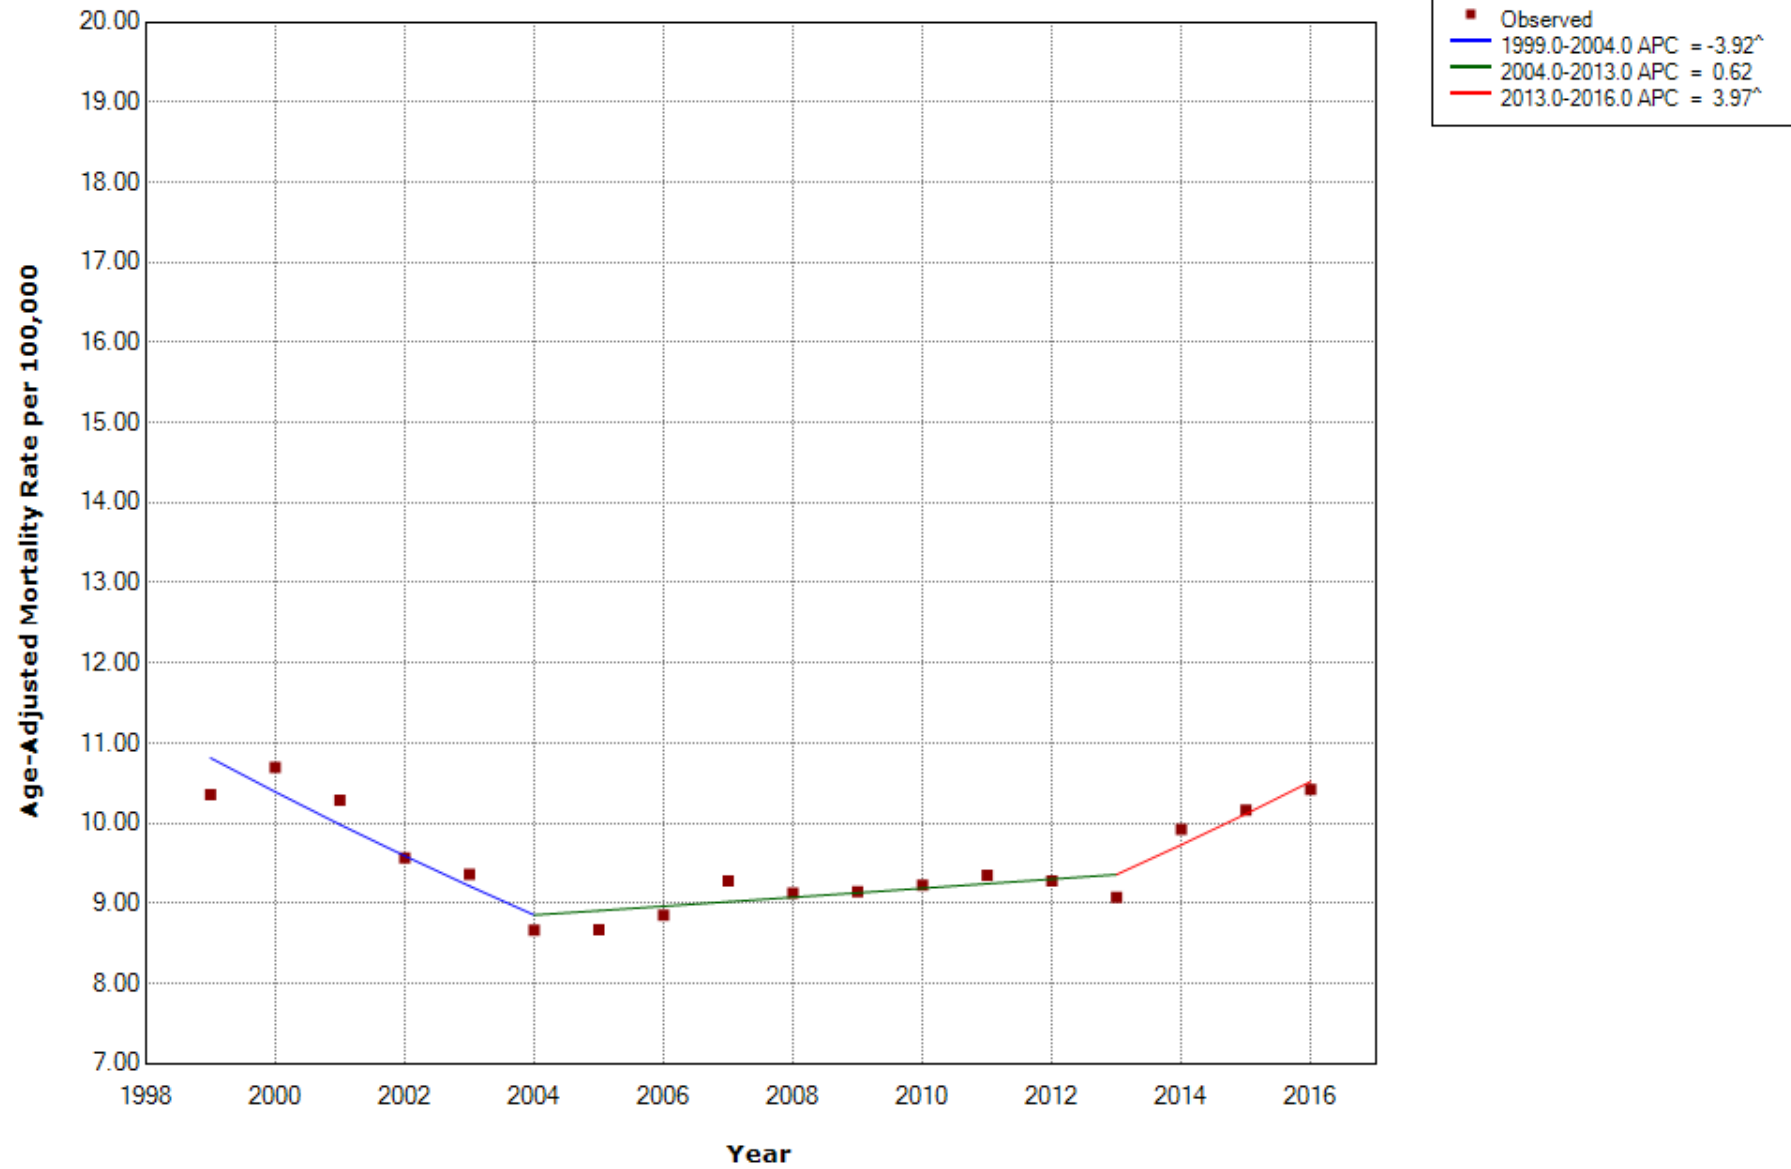

<sup>^</sup> Indicates that the Annual Percent Change (APC) is significantly different from zero at the alpha = 0.05 level.  
Final Selected Model: 2 Joinpoints.

Liver cancer (C22) / NH AIAN: 0 Joinpoints

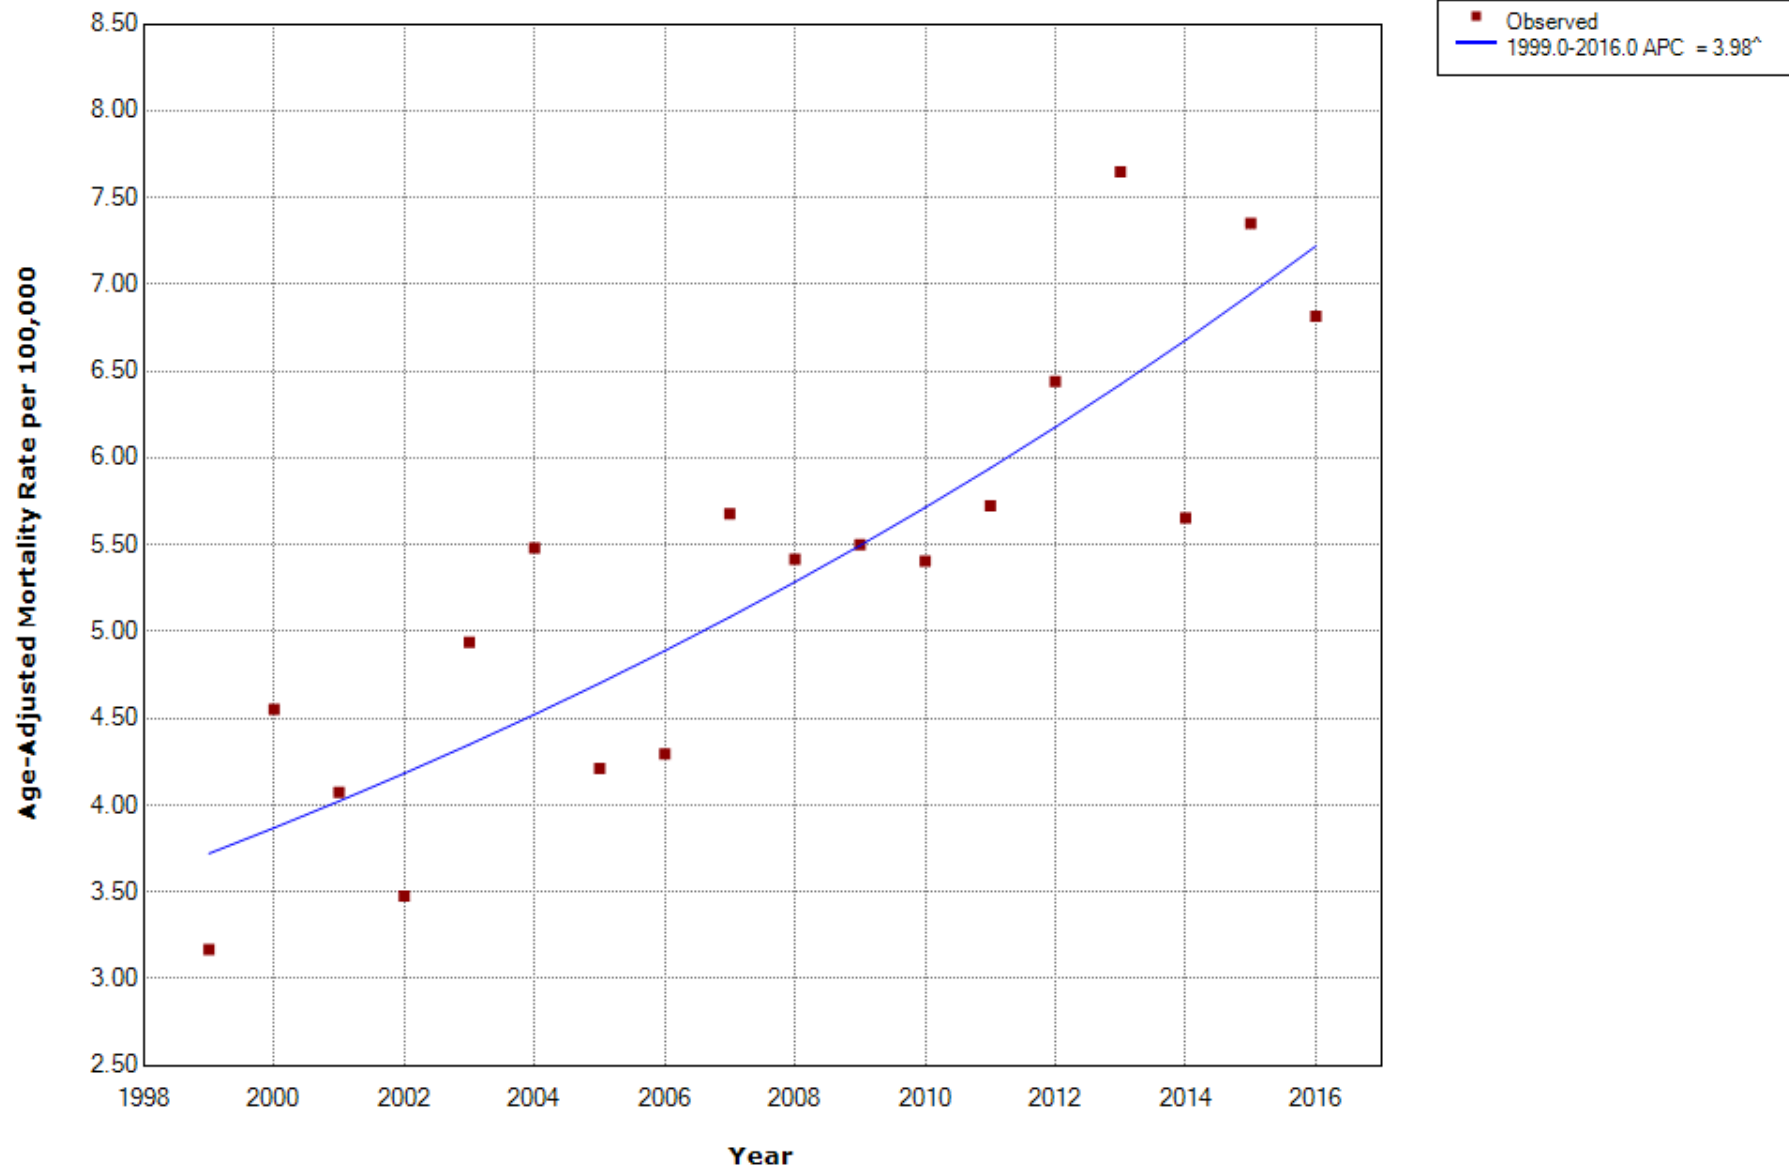

^ Indicates that the Annual Percent Change (APC) is significantly different from zero at the alpha = 0.05 level.  
Final Selected Model: 0 Joinpoints.

### Liver cancer (C22) / NH API: 1 Joinpoint

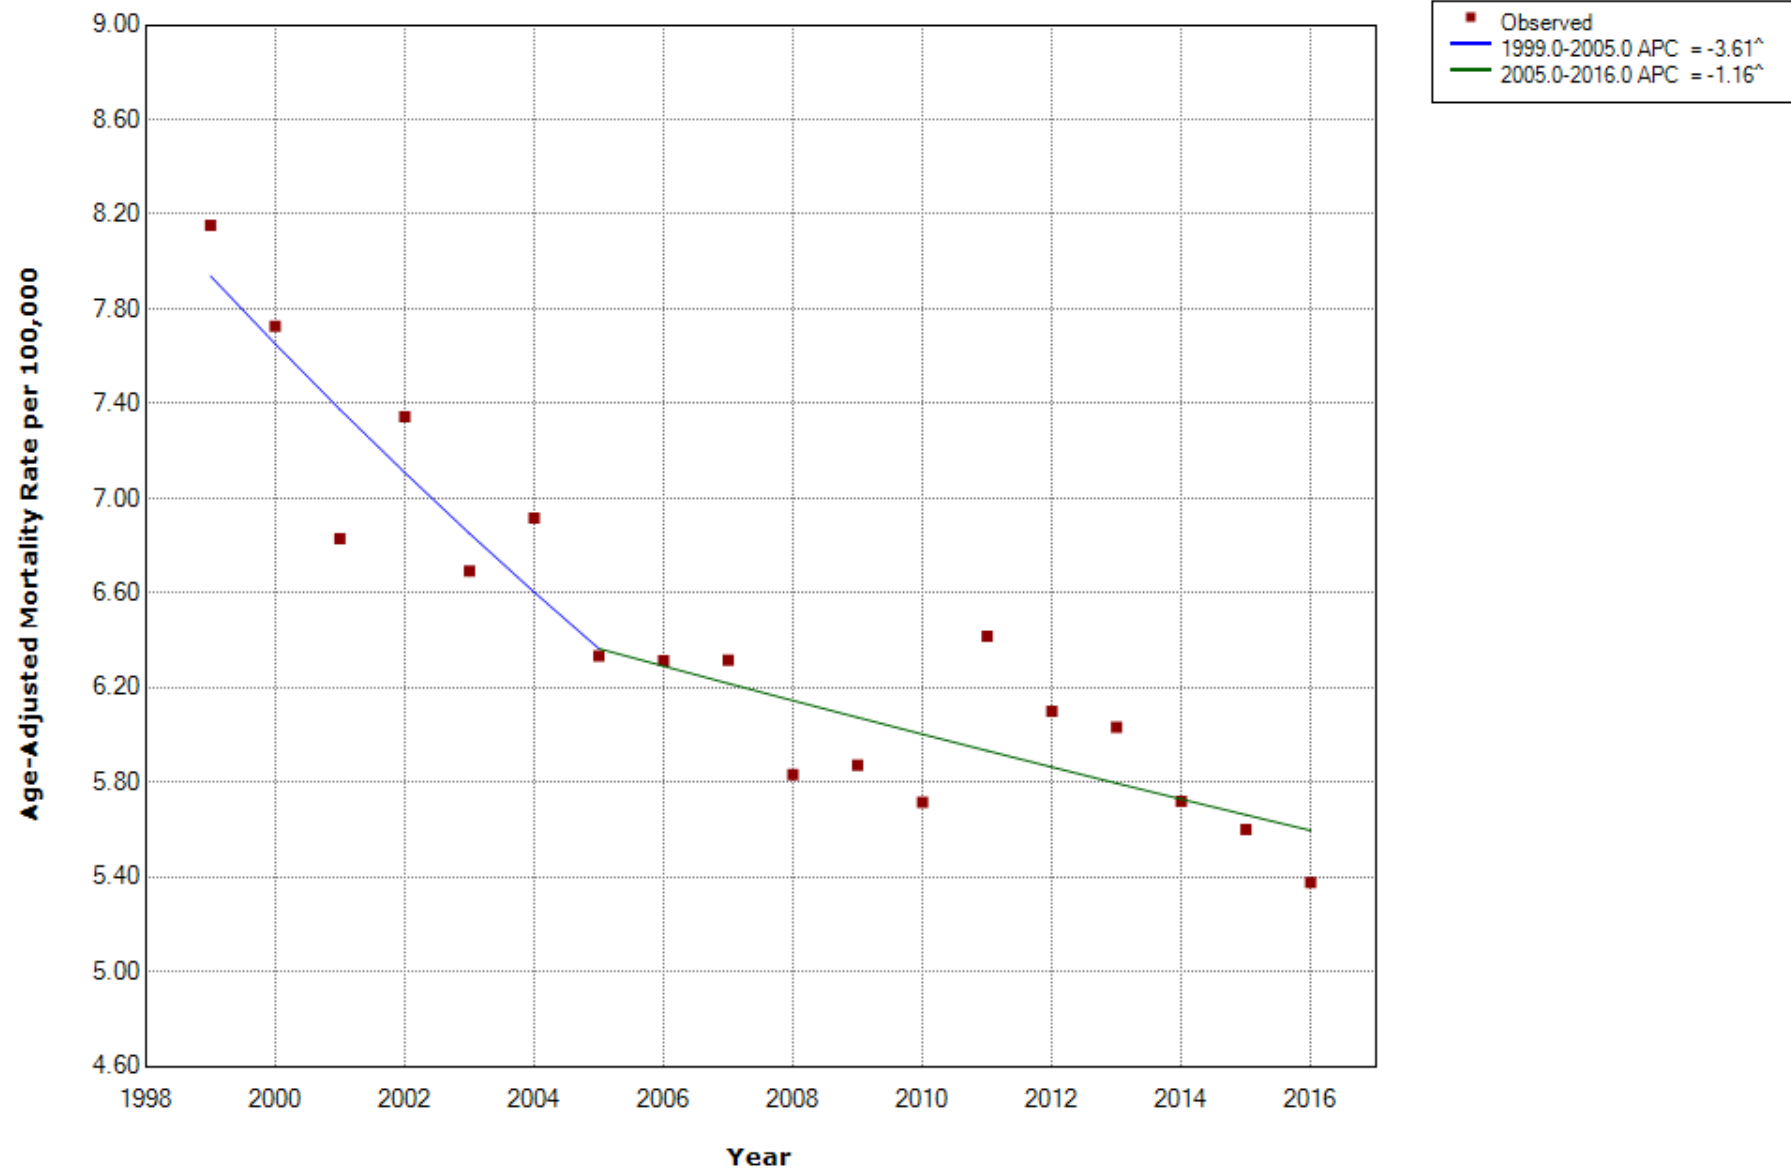

^ Indicates that the Annual Percent Change (APC) is significantly different from zero at the alpha = 0.05 level.  
Final Selected Model: 1 Joinpoint.

### Liver cancer (C22) / NH Blacks: 1 Joinpoint

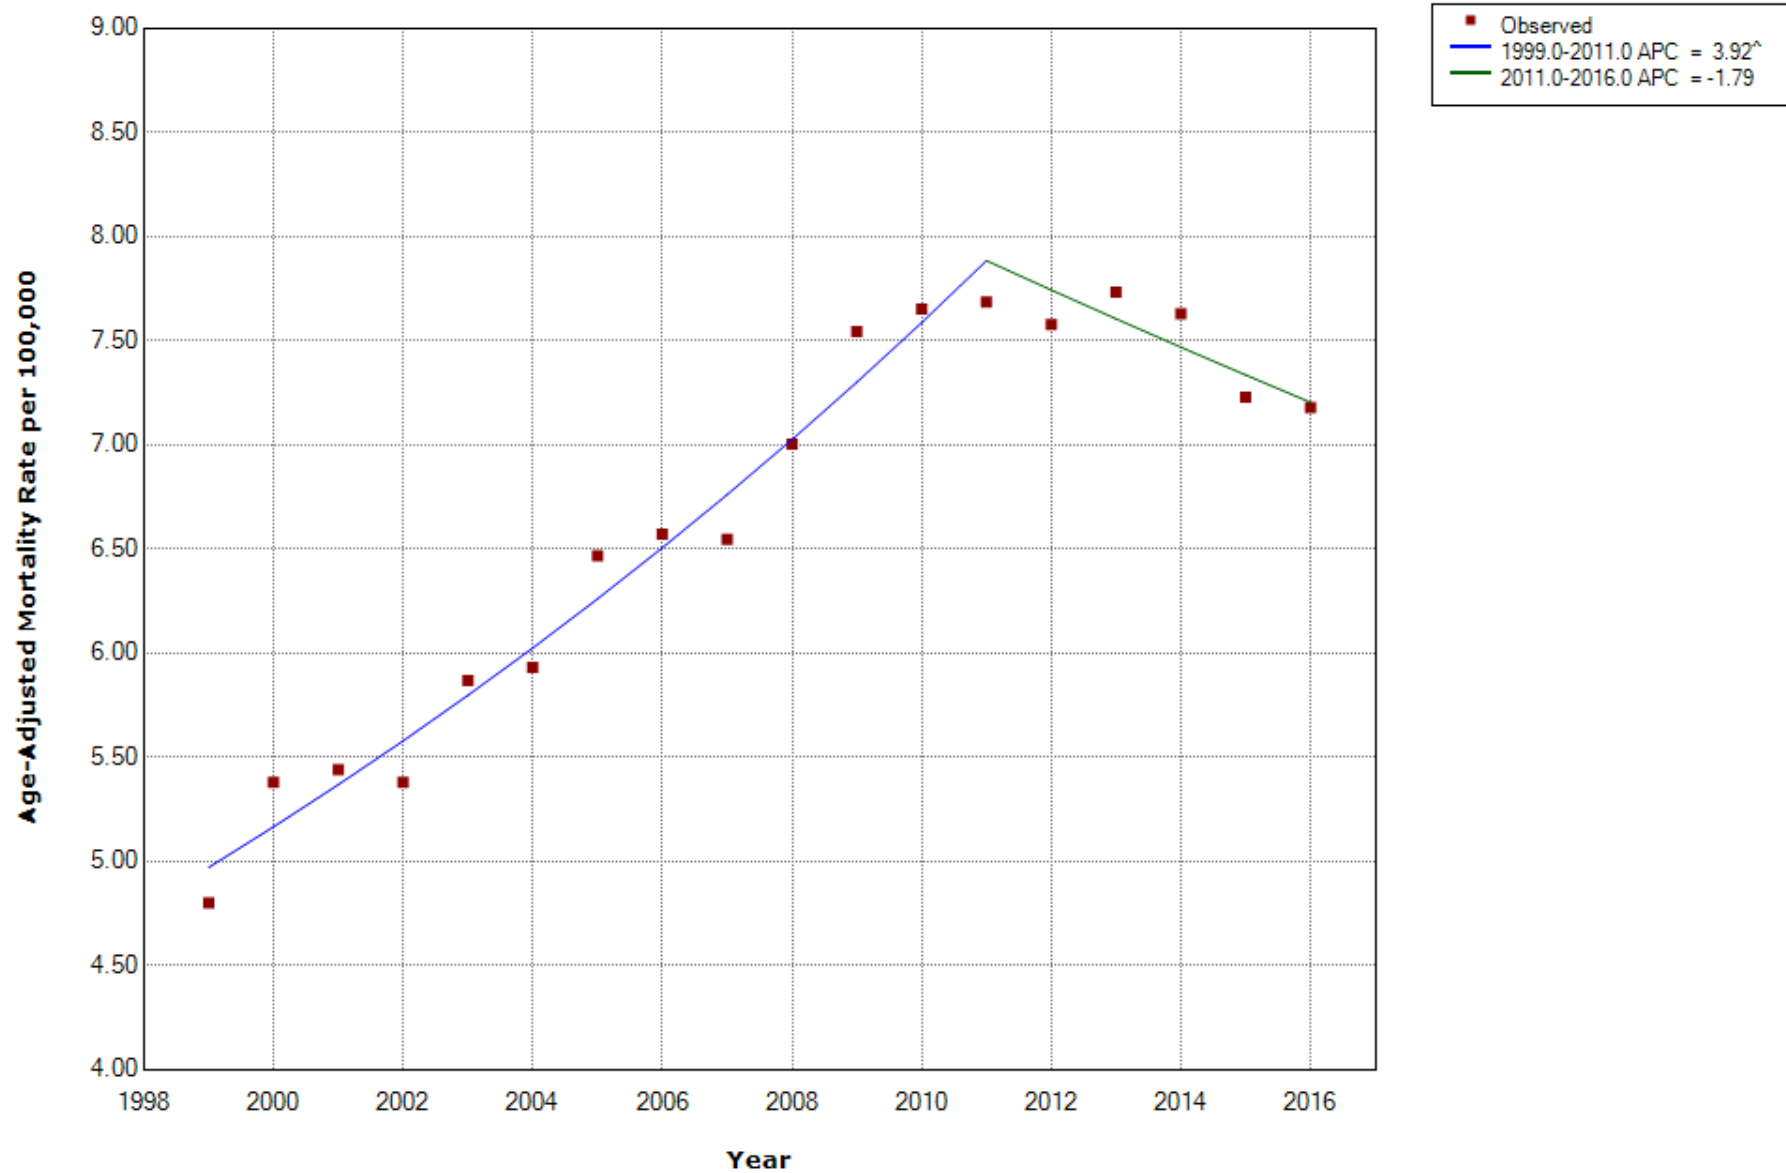

<sup>^</sup> Indicates that the Annual Percent Change (APC) is significantly different from zero at the alpha = 0.05 level.  
Final Selected Model: 1 Joinpoint.

### Liver cancer (C22) / NH whites: 1 Joinpoint

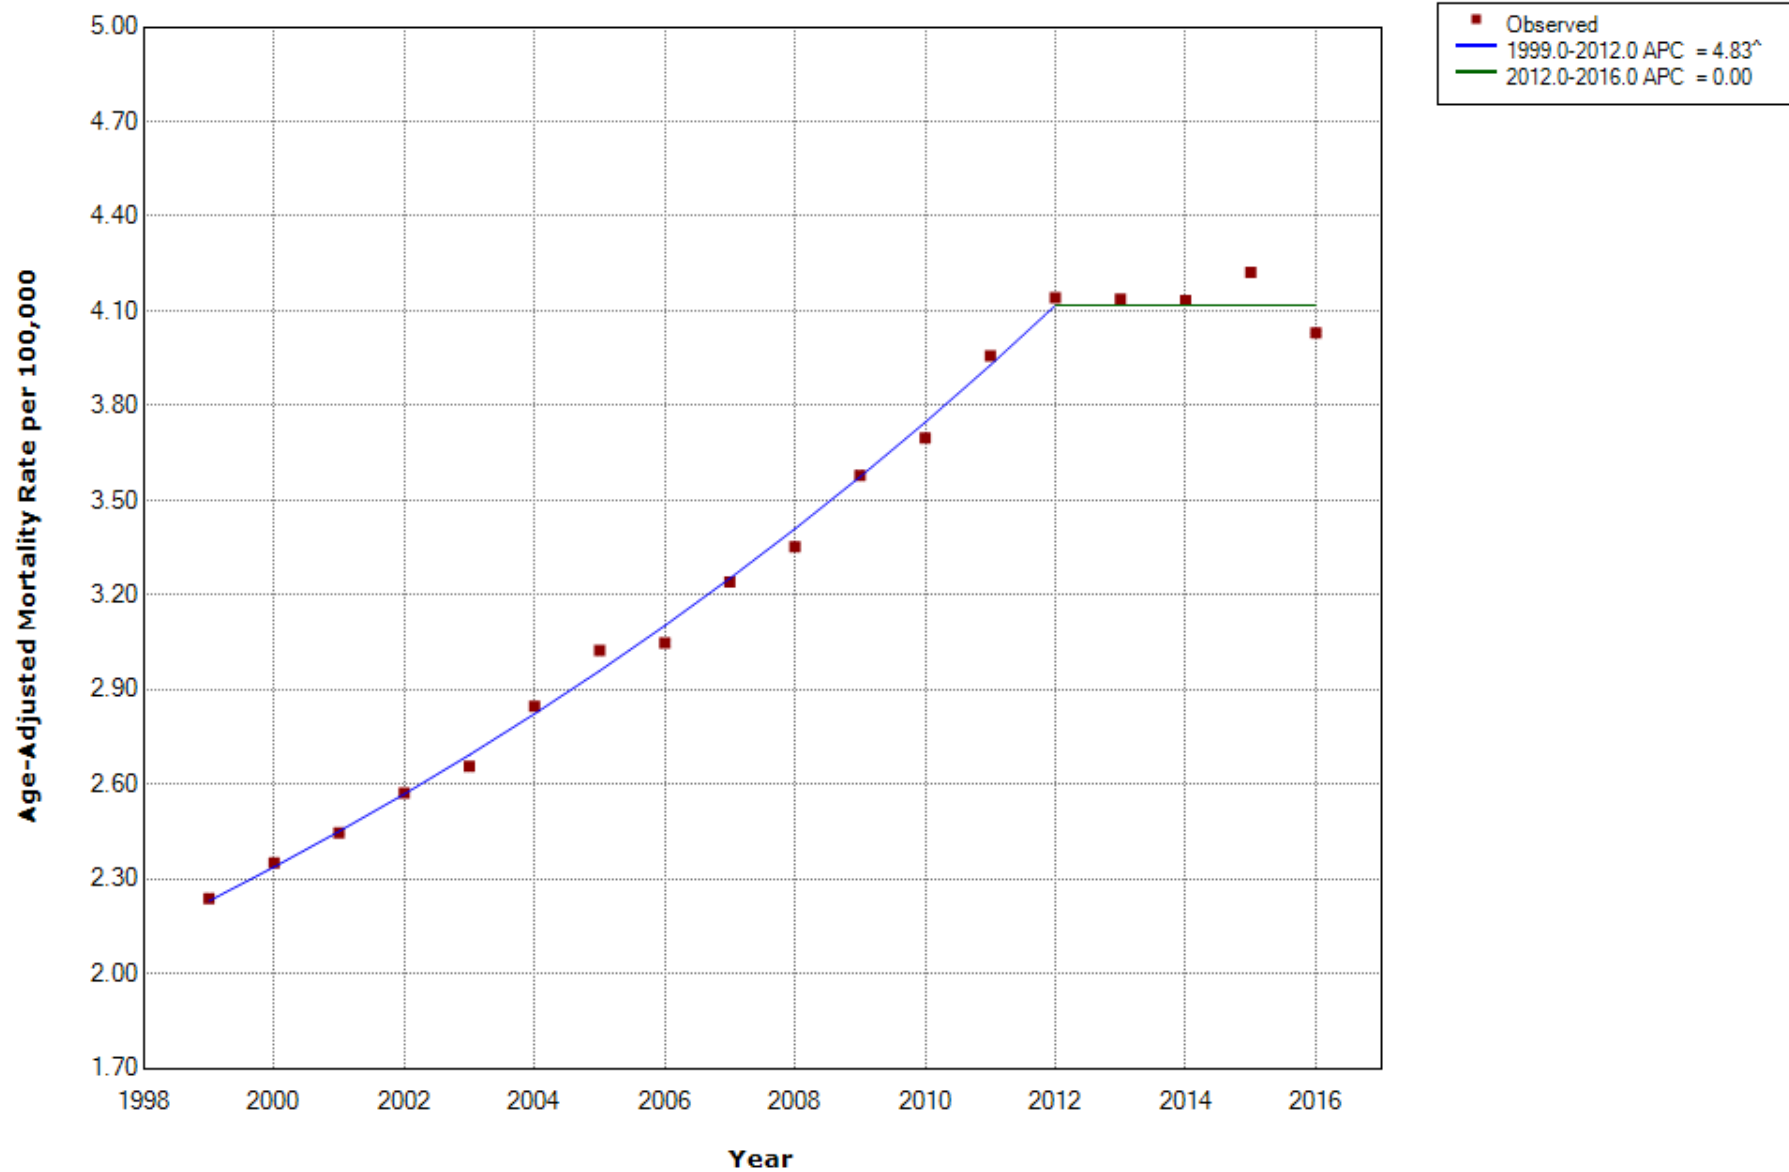

^ Indicates that the Annual Percent Change (APC) is significantly different from zero at the alpha = 0.05 level.  
Final Selected Model: 1 Joinpoint.

### Liver cancer (C22) / Hispanics: 1 Joinpoint

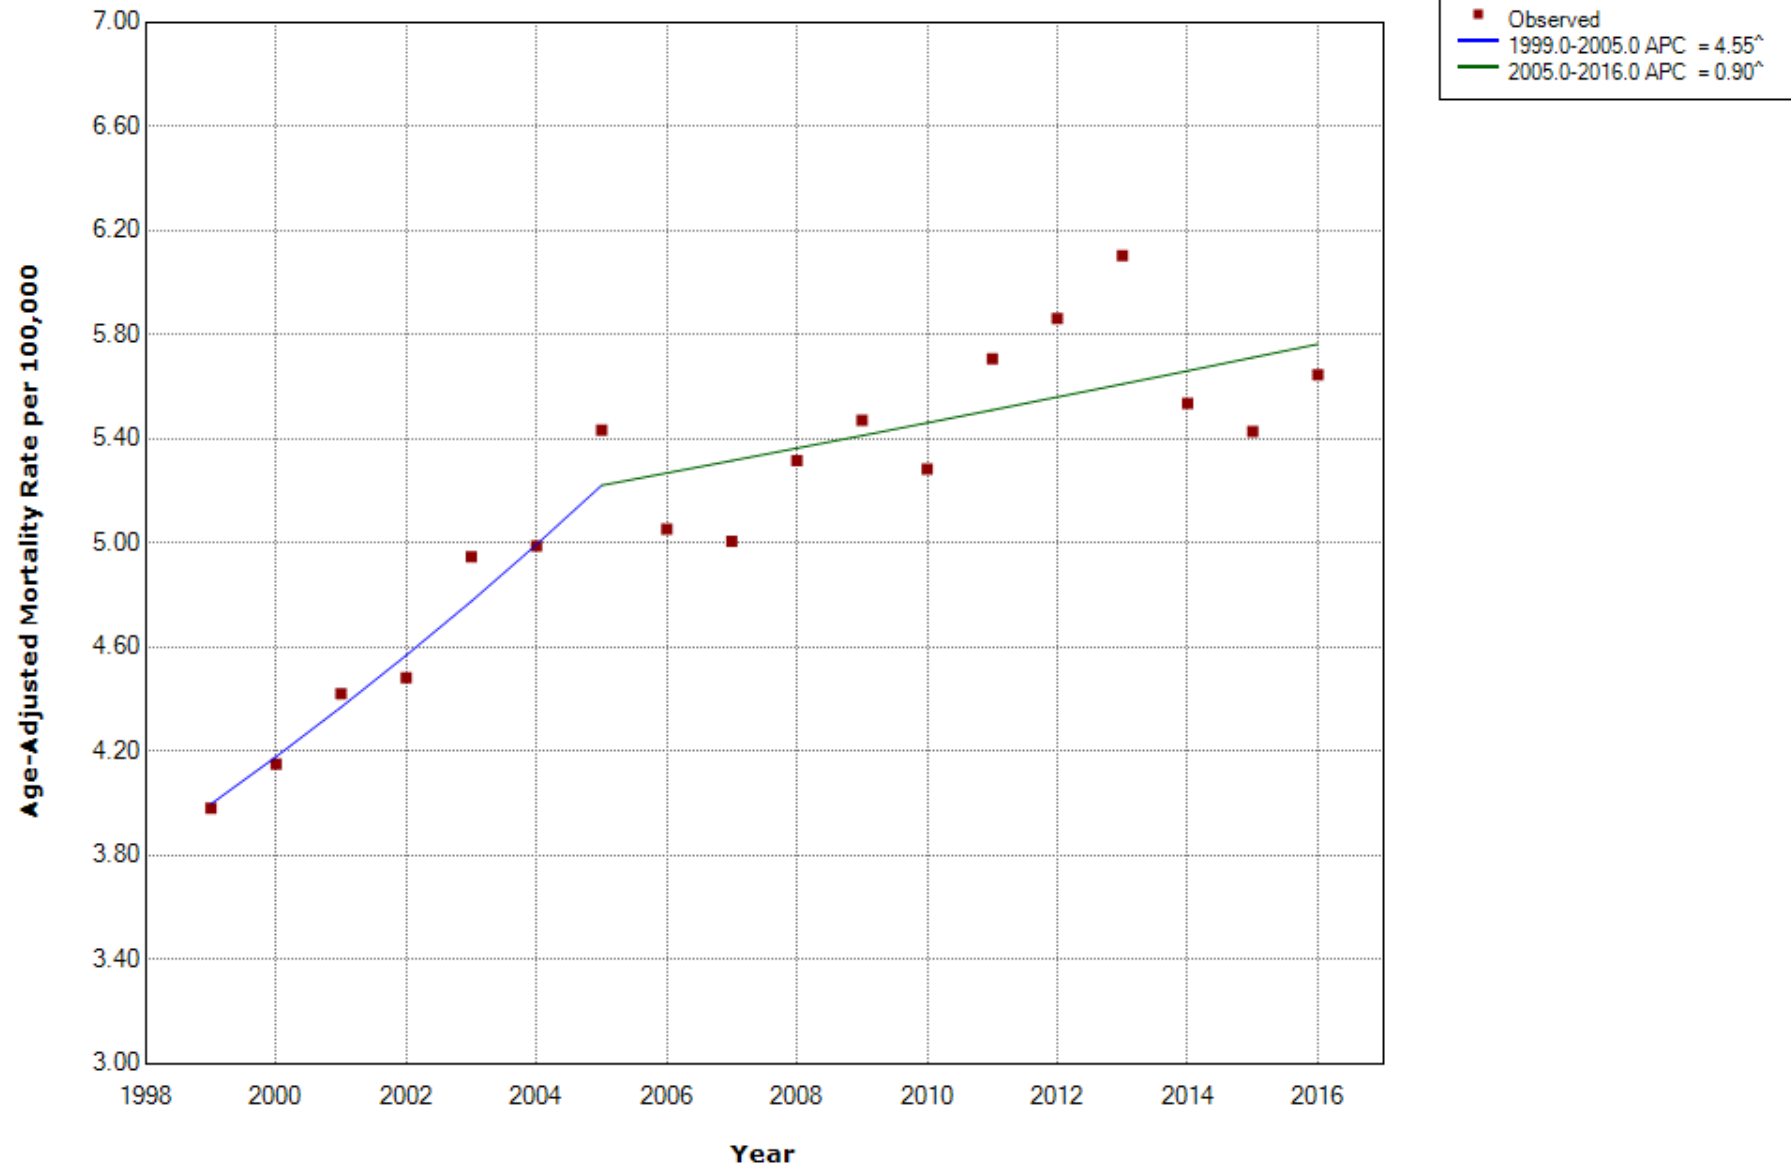

^ Indicates that the Annual Percent Change (APC) is significantly different from zero at the alpha = 0.05 level.  
Final Selected Model: 1 Joinpoint.



Pancreatic cancer (C25) / NH AIAN: 0 Joinpoints

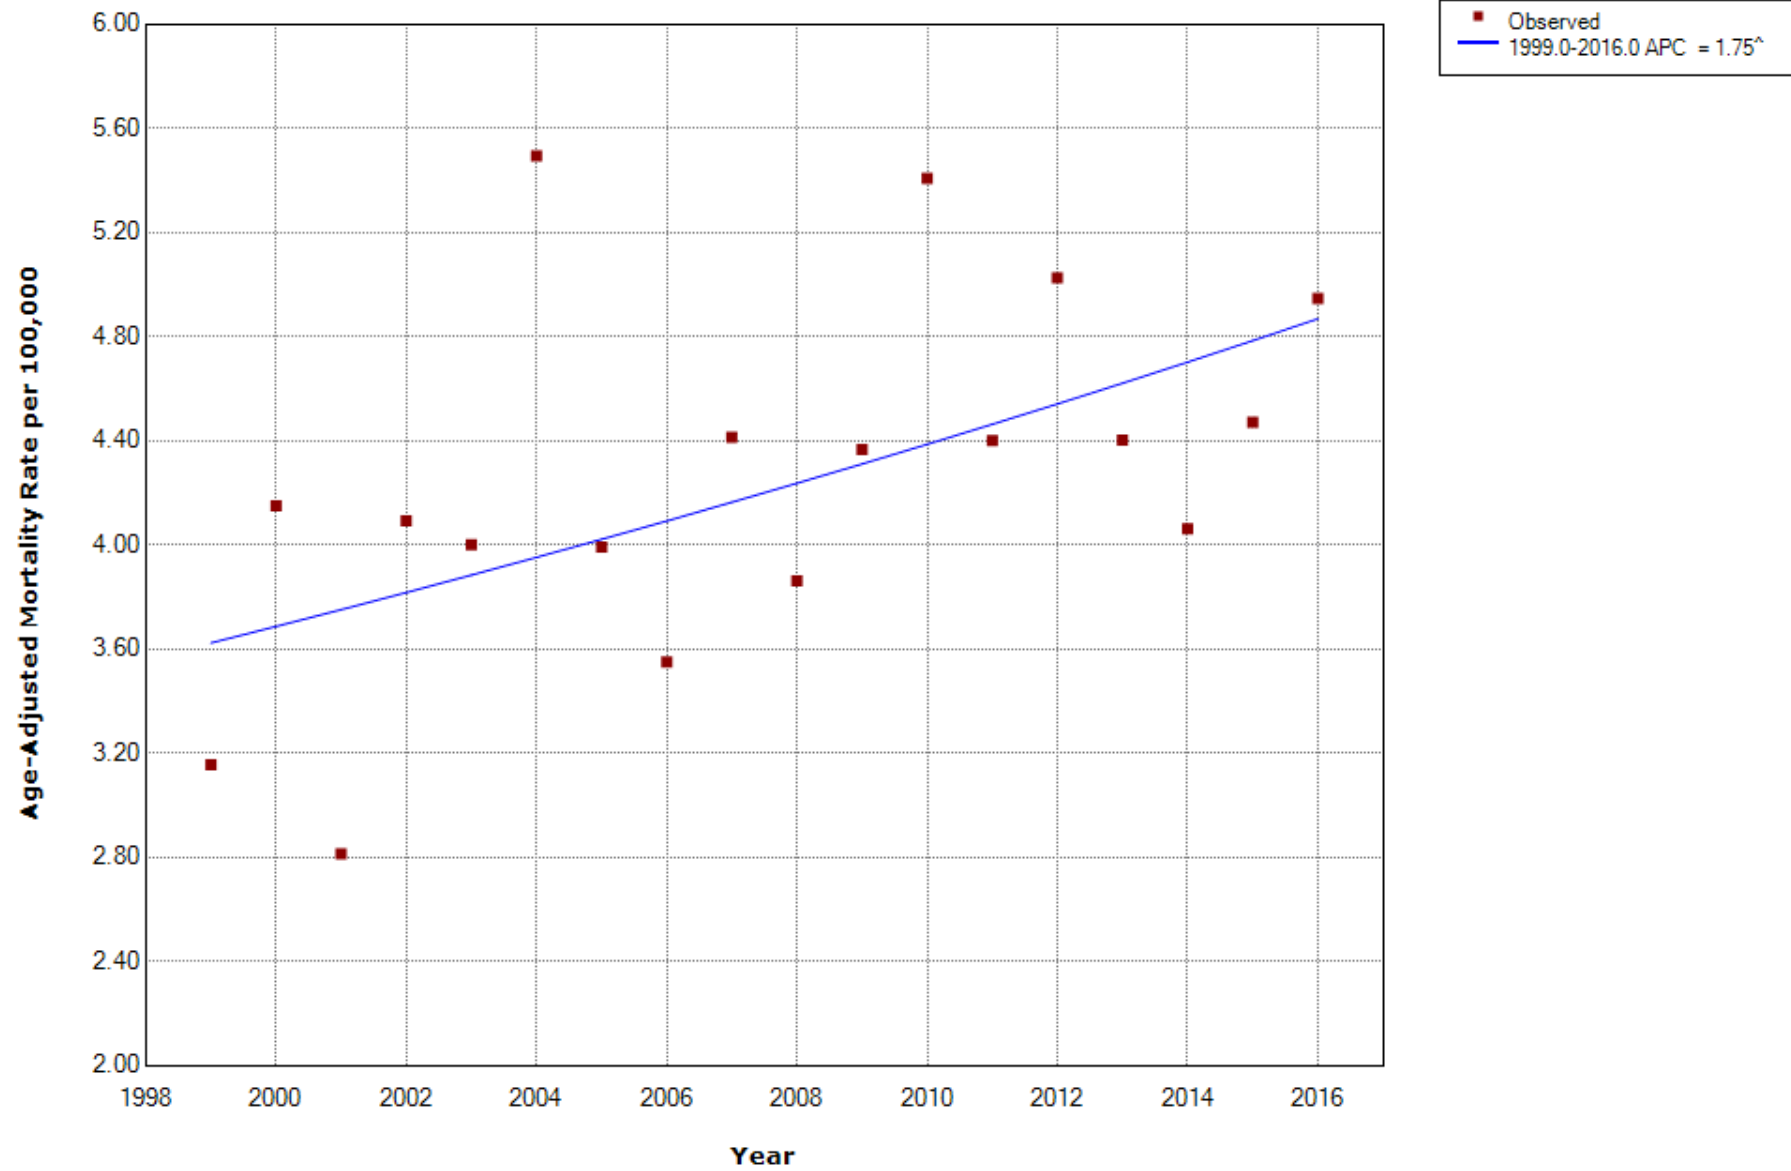

^ Indicates that the Annual Percent Change (APC) is significantly different from zero at the alpha = 0.05 level.  
Final Selected Model: 0 Joinpoints.

Pancreatic cancer (C25) / NH API: 0 Joinpoints

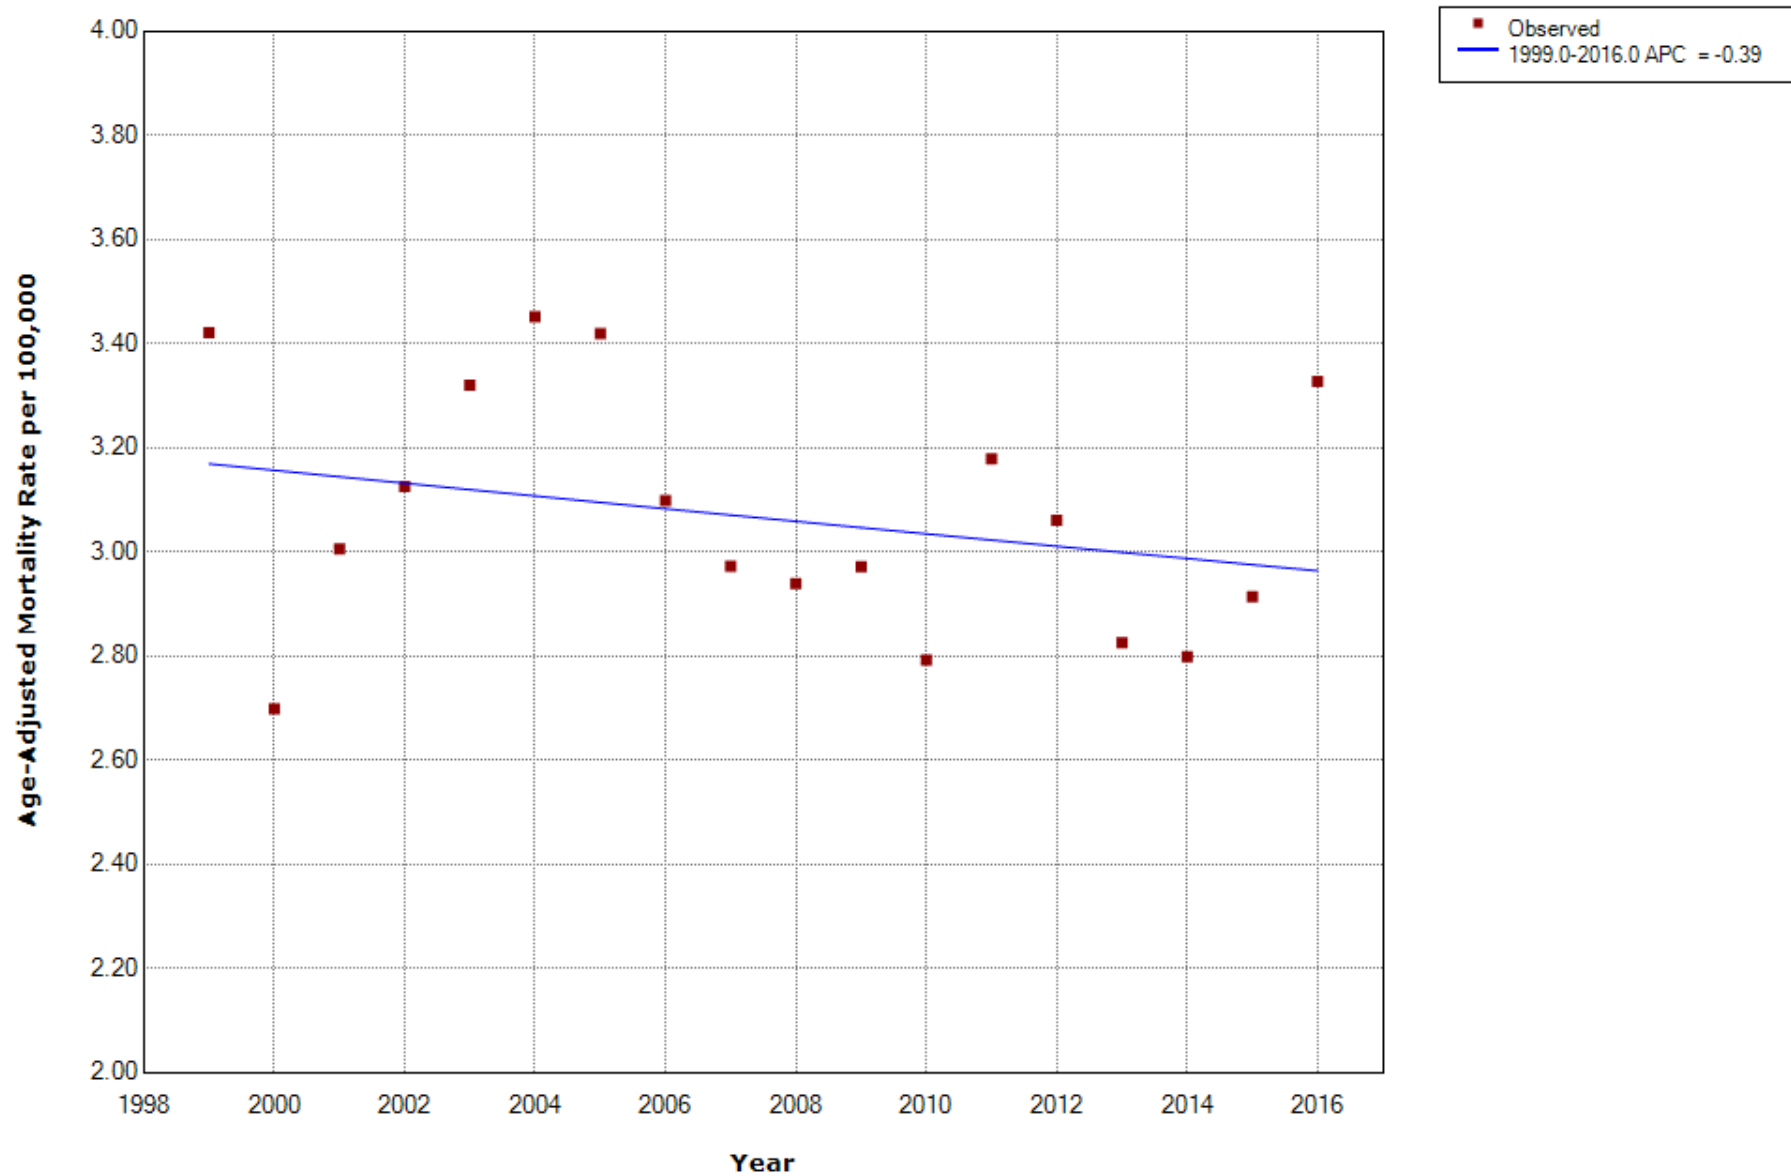

^ Indicates that the Annual Percent Change (APC) is significantly different from zero at the alpha = 0.05 level.  
Final Selected Model: 0 Joinpoints.

### Pancreatic cancer (C25) / NH Blacks: 3 Joinpoints

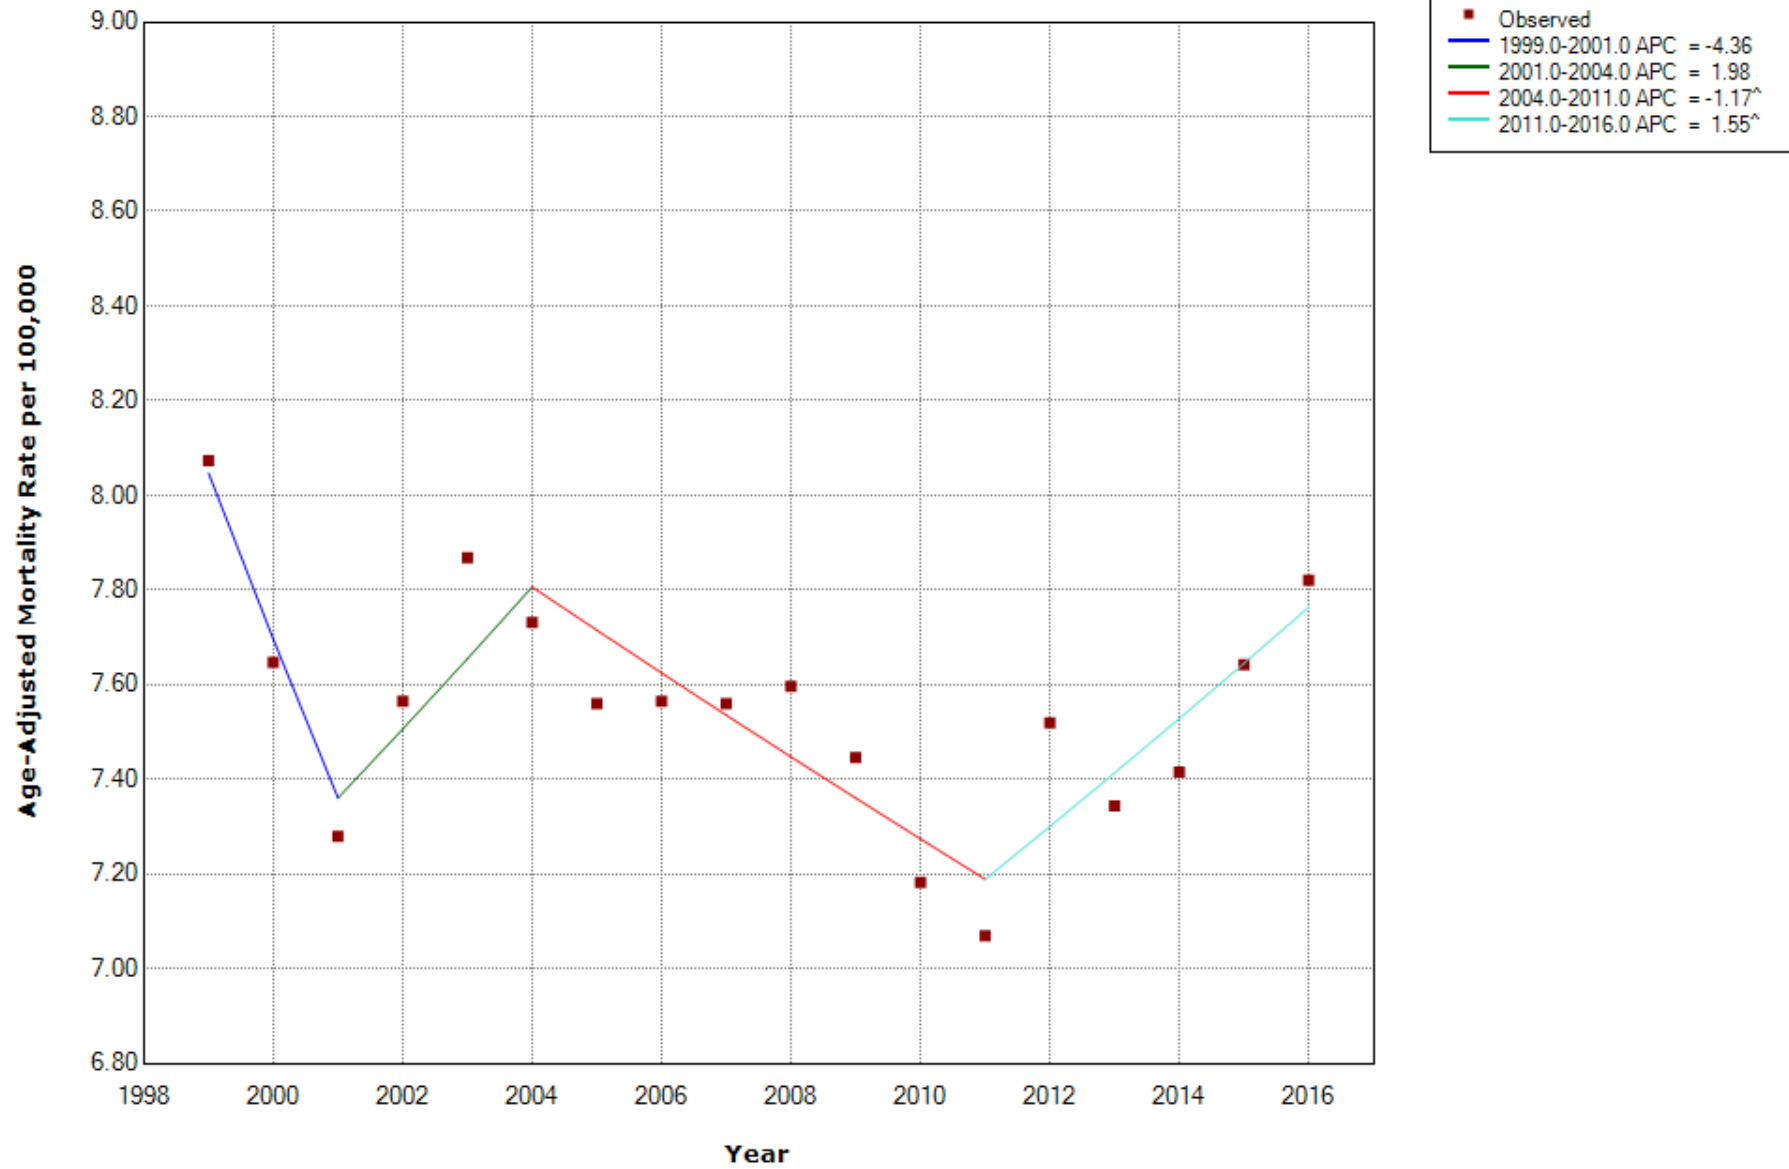

<sup>^</sup> Indicates that the Annual Percent Change (APC) is significantly different from zero at the alpha = 0.05 level.  
Final Selected Model: 3 Joinpoints.

Pancreatic cancer (C25) / NH whites: 0 Joinpoints

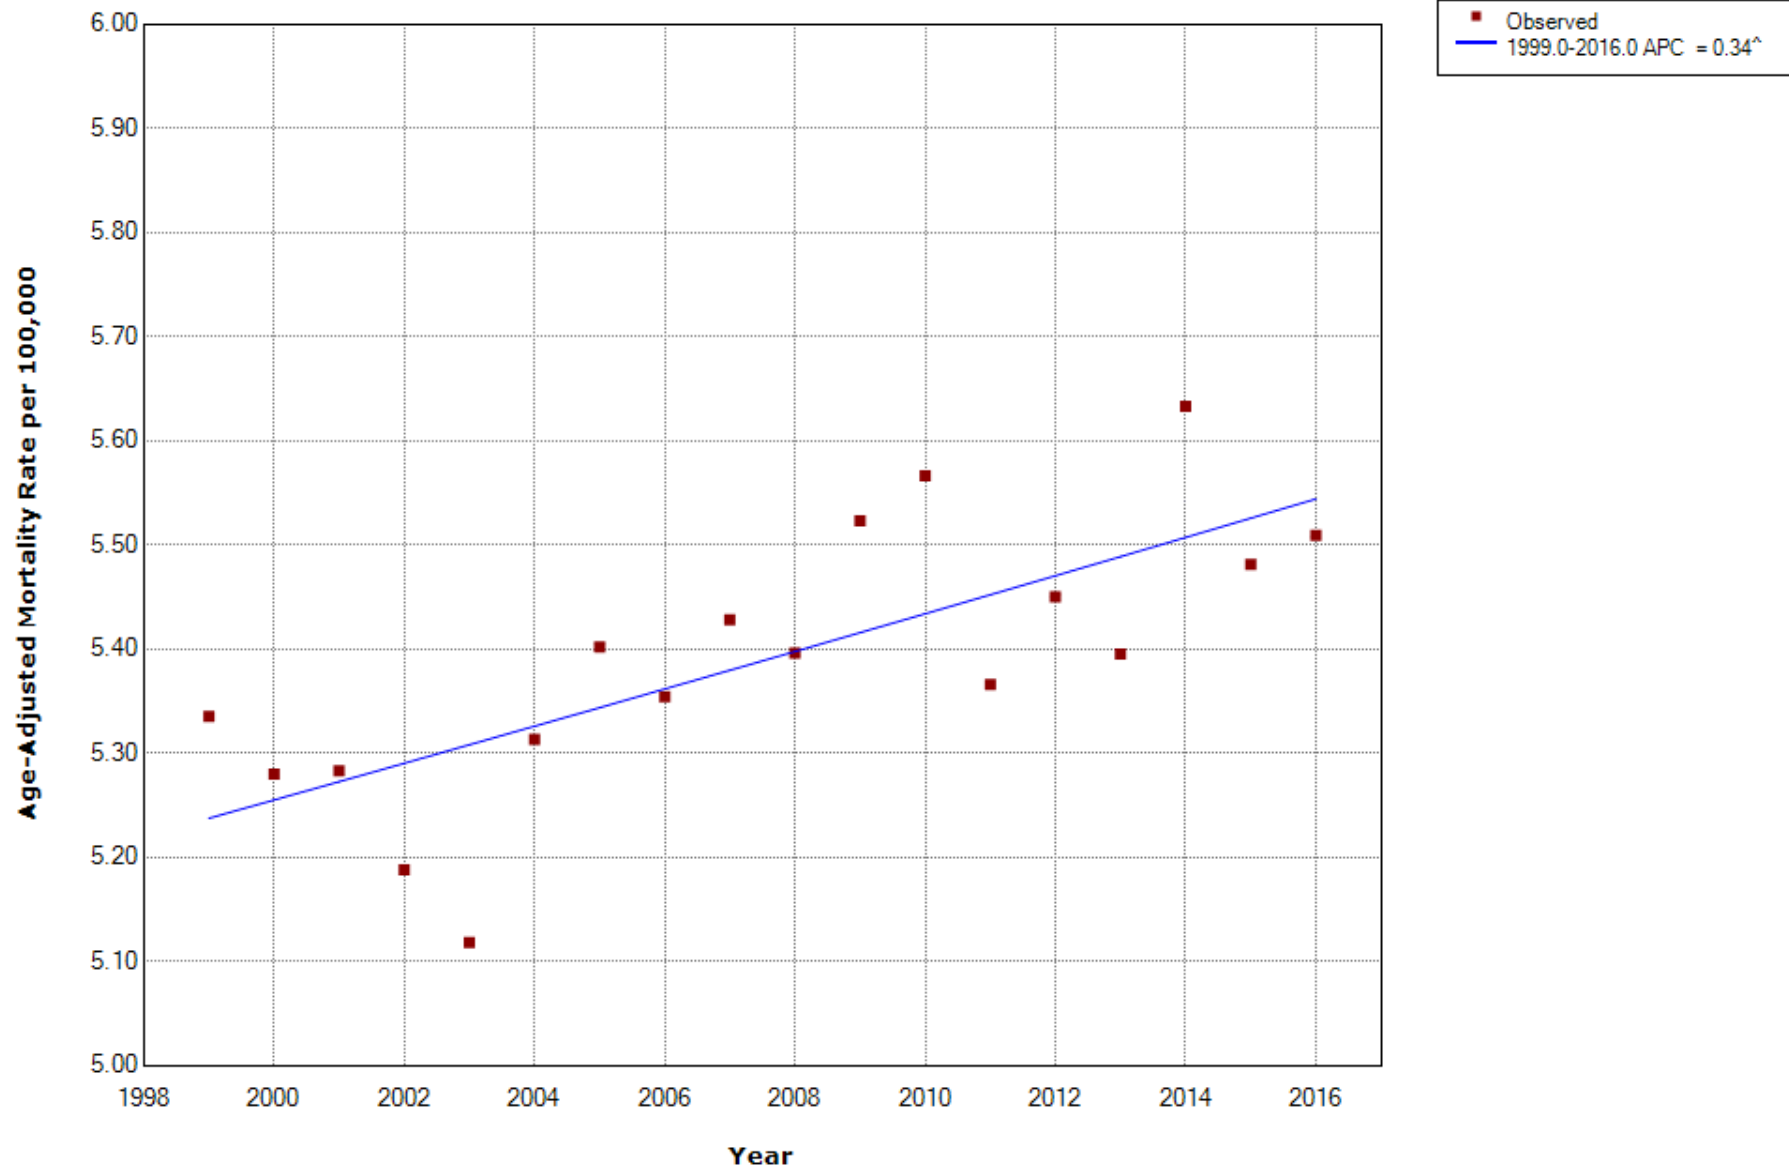

^ Indicates that the Annual Percent Change (APC) is significantly different from zero at the alpha = 0.05 level.  
Final Selected Model: 0 Joinpoints.

Pancreatic cancer (C25) / Hispanics: 0 Joinpoints

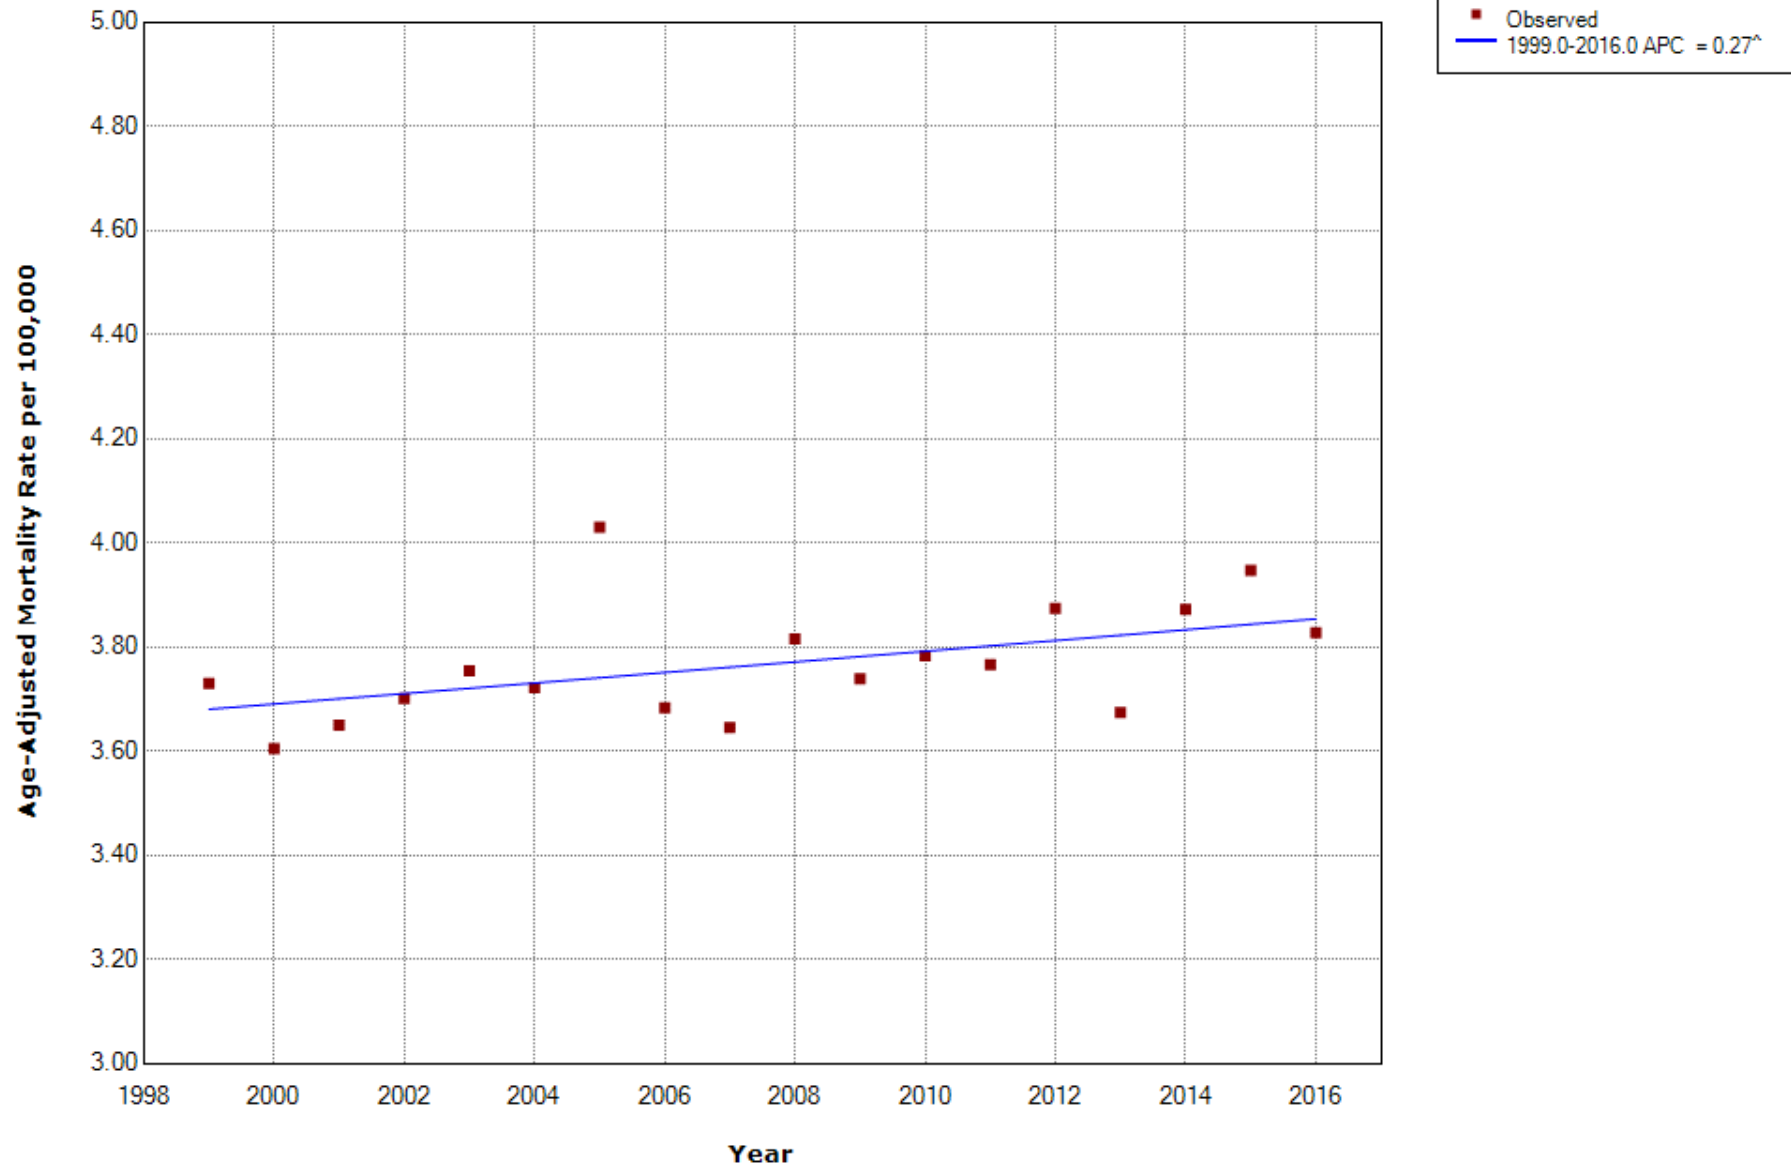

^ Indicates that the Annual Percent Change (APC) is significantly different from zero at the alpha = 0.05 level.  
Final Selected Model: 0 Joinpoints.

### Chronic lower respiratory diseases (J40-J47) / NH AIAN: 0 Joinpoints

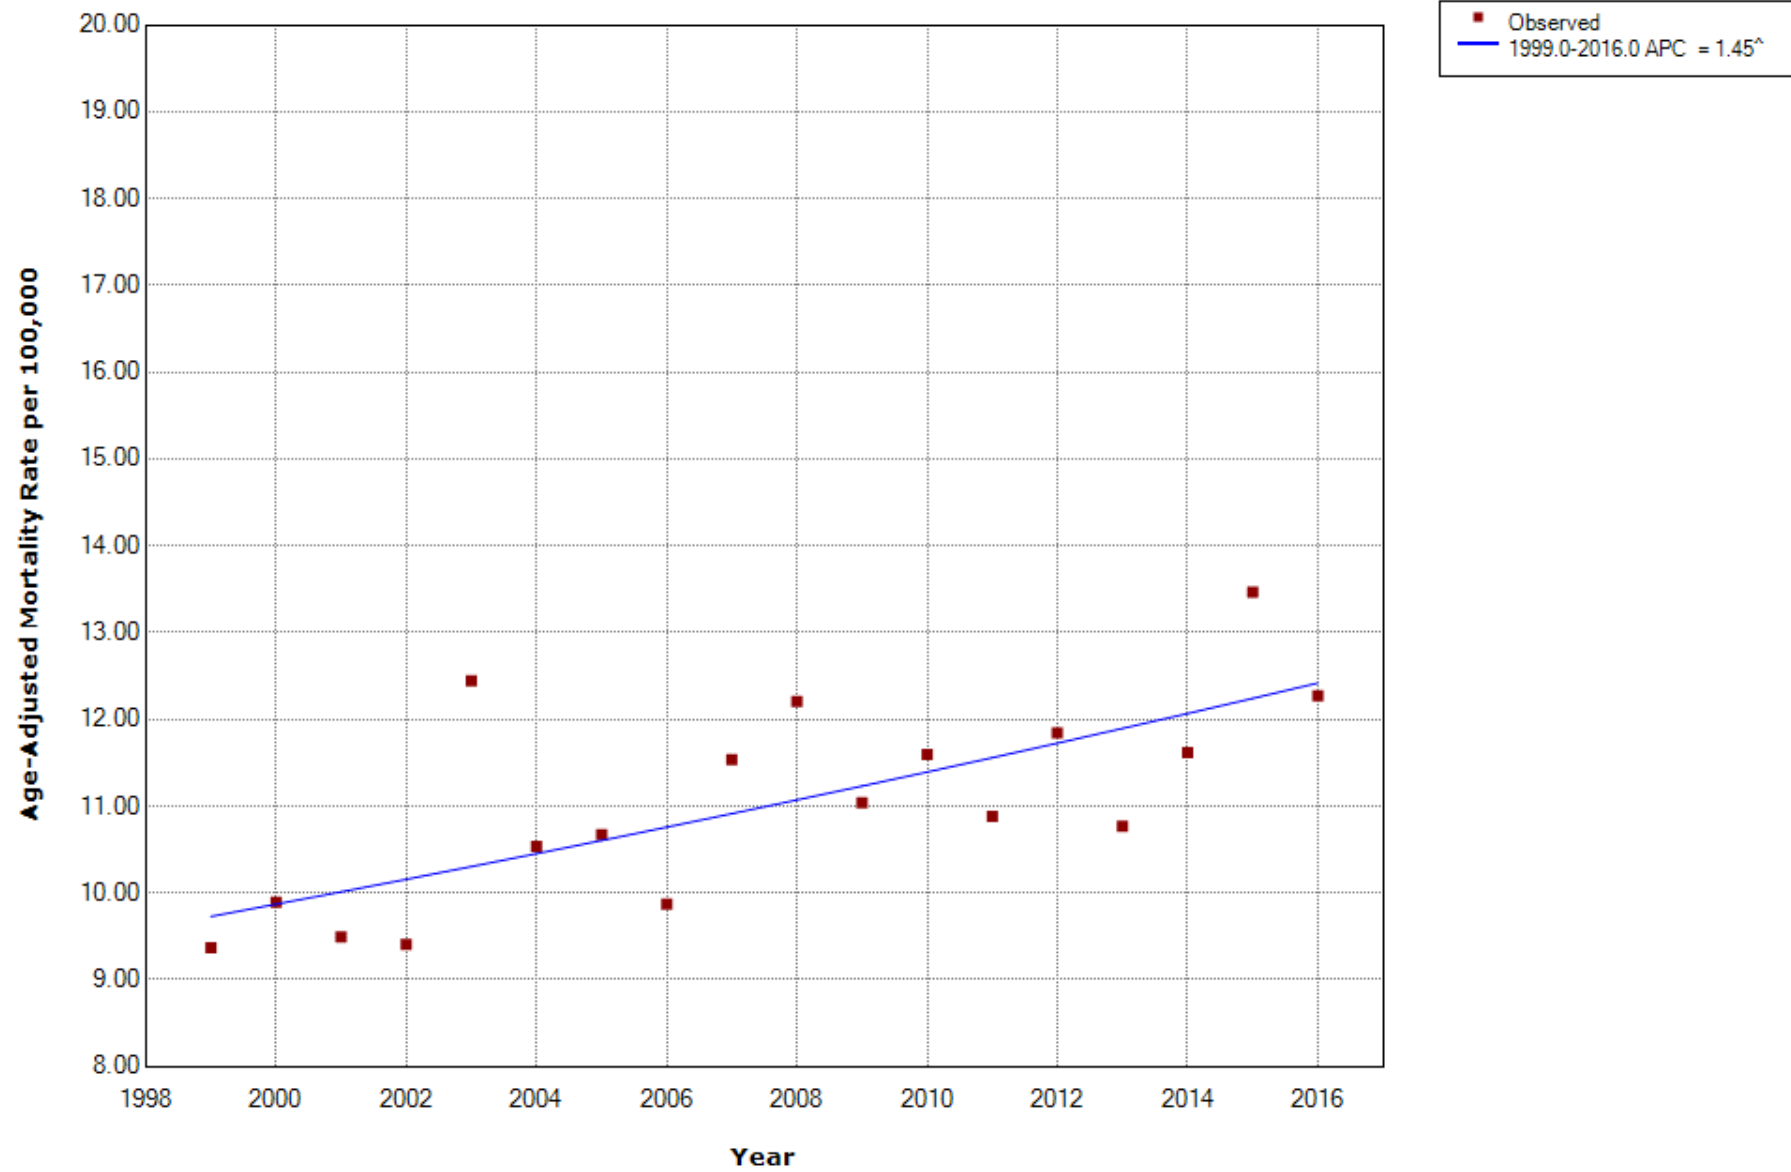

^ Indicates that the Annual Percent Change (APC) is significantly different from zero at the alpha = 0.05 level.  
Final Selected Model: 0 Joinpoints.

### Chronic lower respiratory diseases (J40-J47) / NH API: 1 Joinpoint

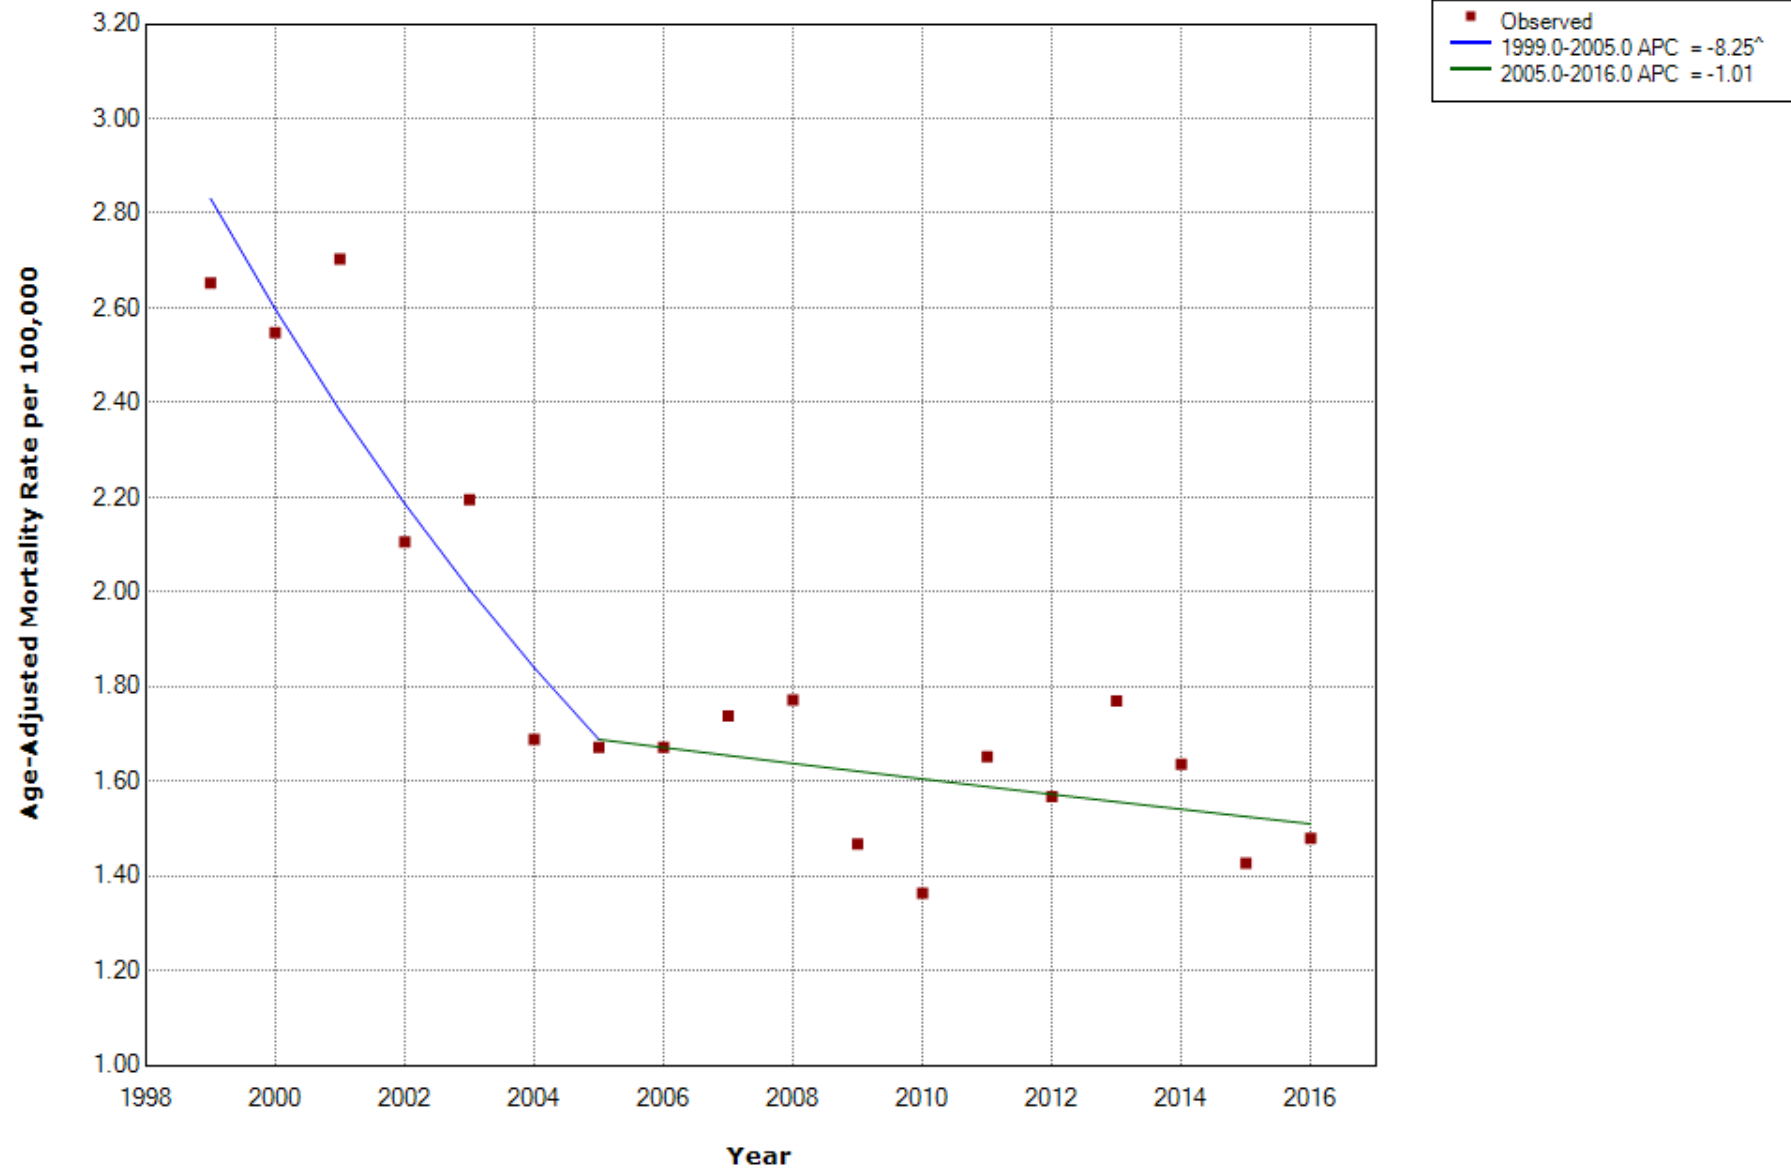

^ Indicates that the Annual Percent Change (APC) is significantly different from zero at the alpha = 0.05 level.  
Final Selected Model: 1 Joinpoint.

### Chronic lower respiratory diseases (J40-J47) / NH Blacks: 1 Joinpoint

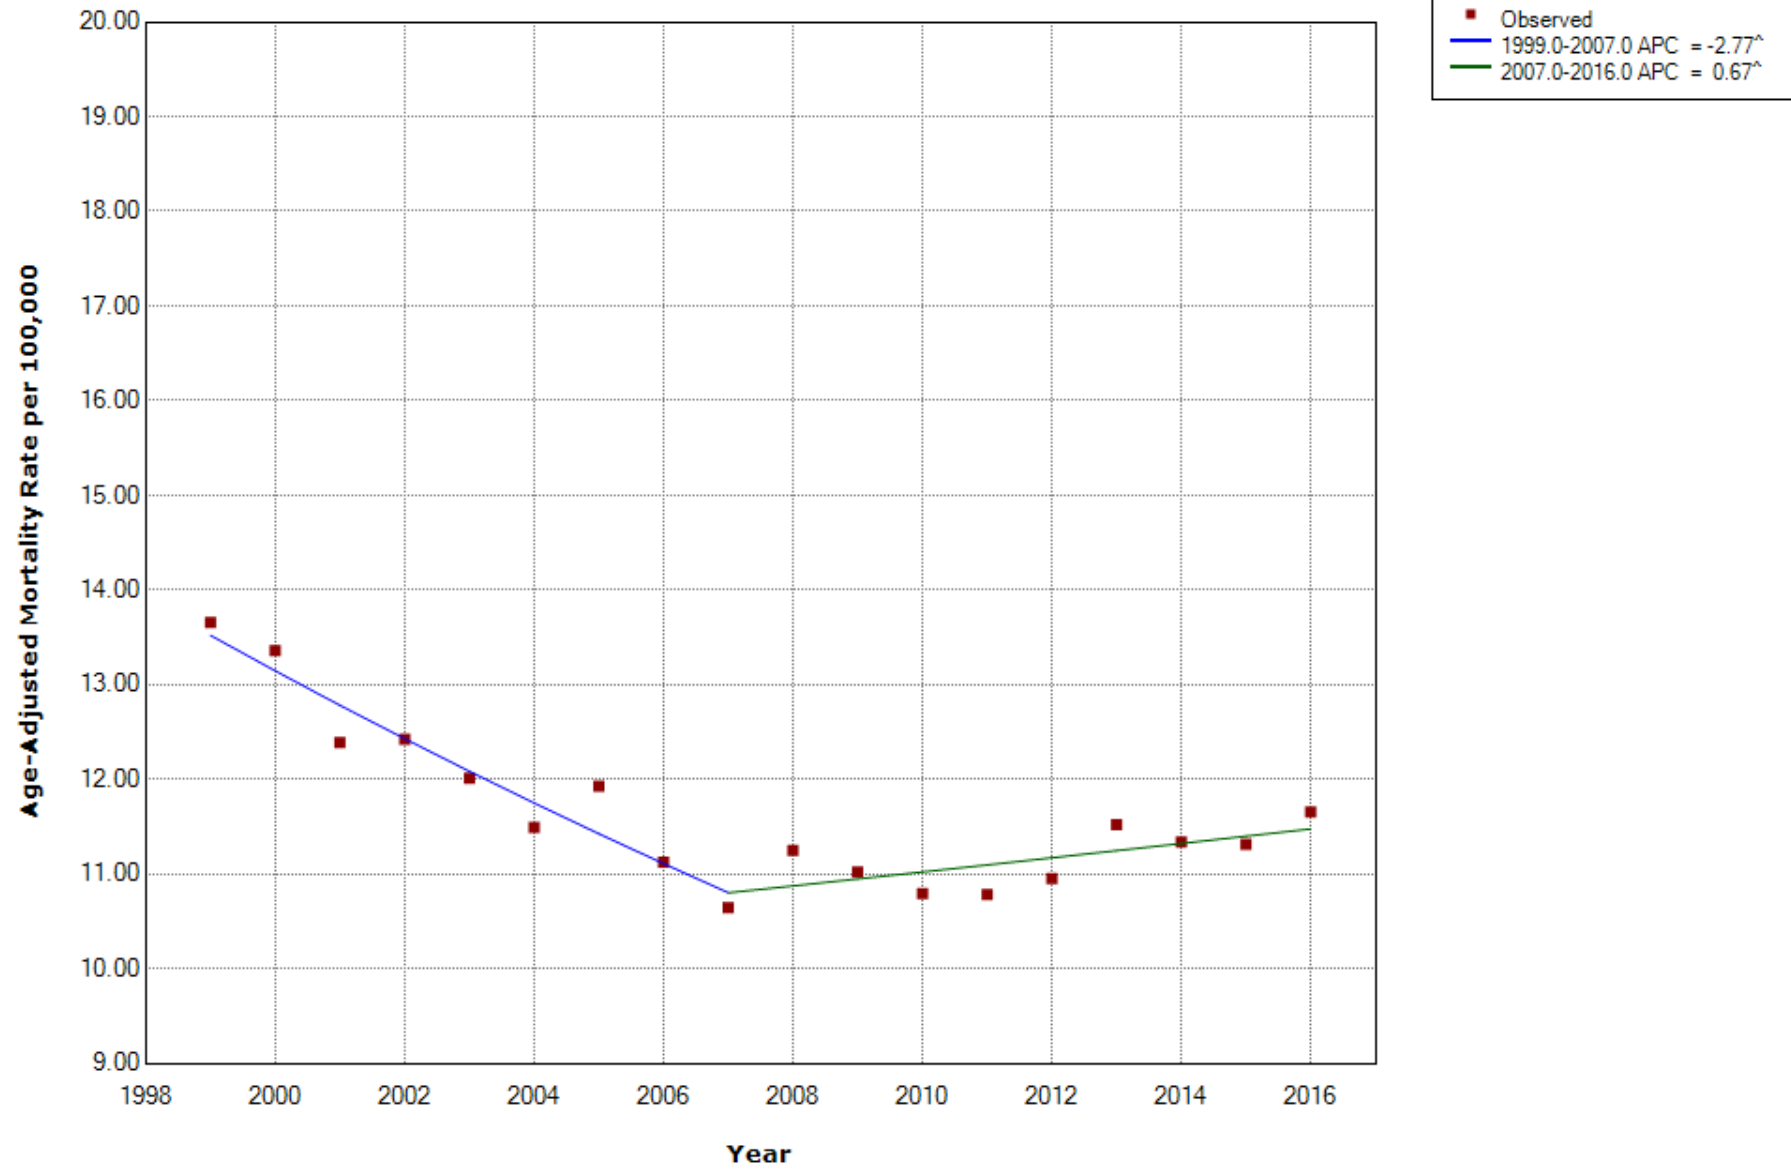

<sup>^</sup> Indicates that the Annual Percent Change (APC) is significantly different from zero at the alpha = 0.05 level.  
Final Selected Model: 1 Joinpoint.



### Chronic lower respiratory diseases (J40-J47) / NH whites: 1 Joinpoint

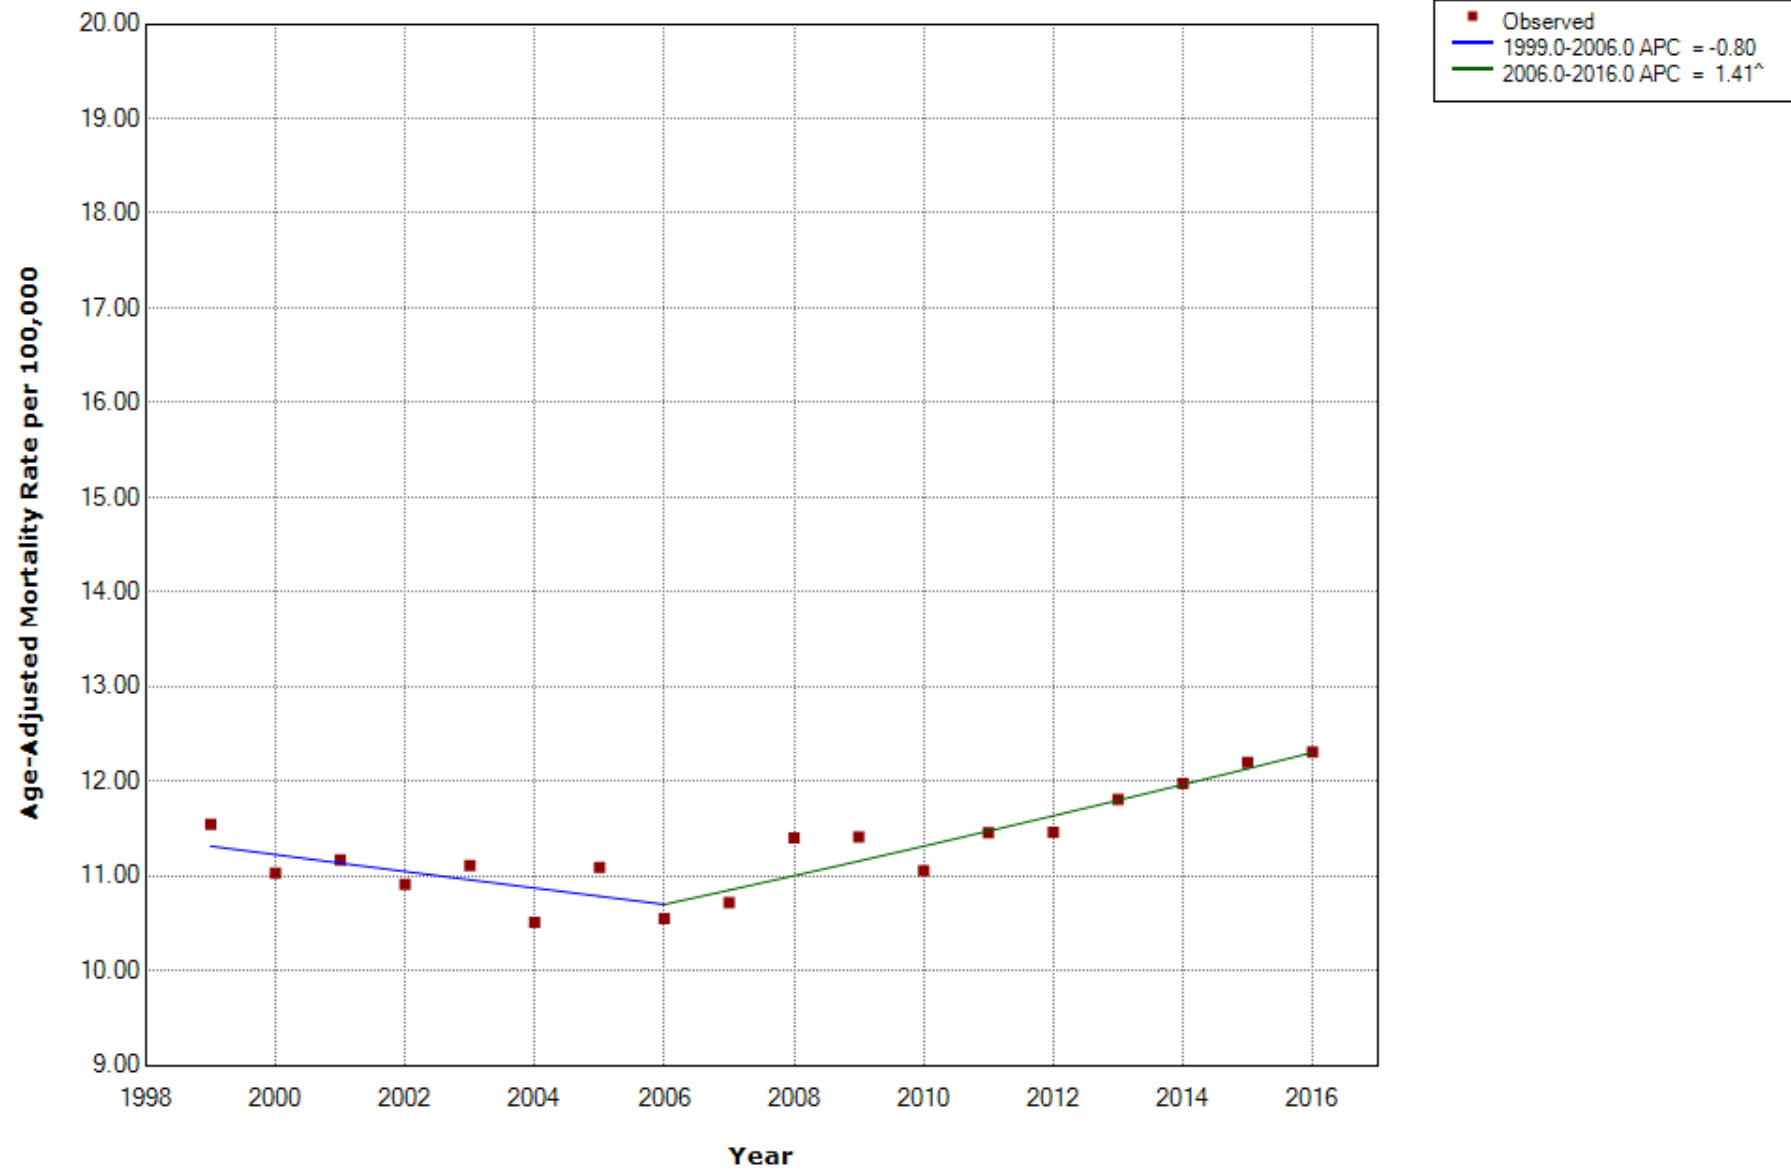

^ Indicates that the Annual Percent Change (APC) is significantly different from zero at the alpha = 0.05 level.  
Final Selected Model: 1 Joinpoint.

### Chronic lower respiratory diseases (J40-J47) / Hispanics: 1 Joinpoint

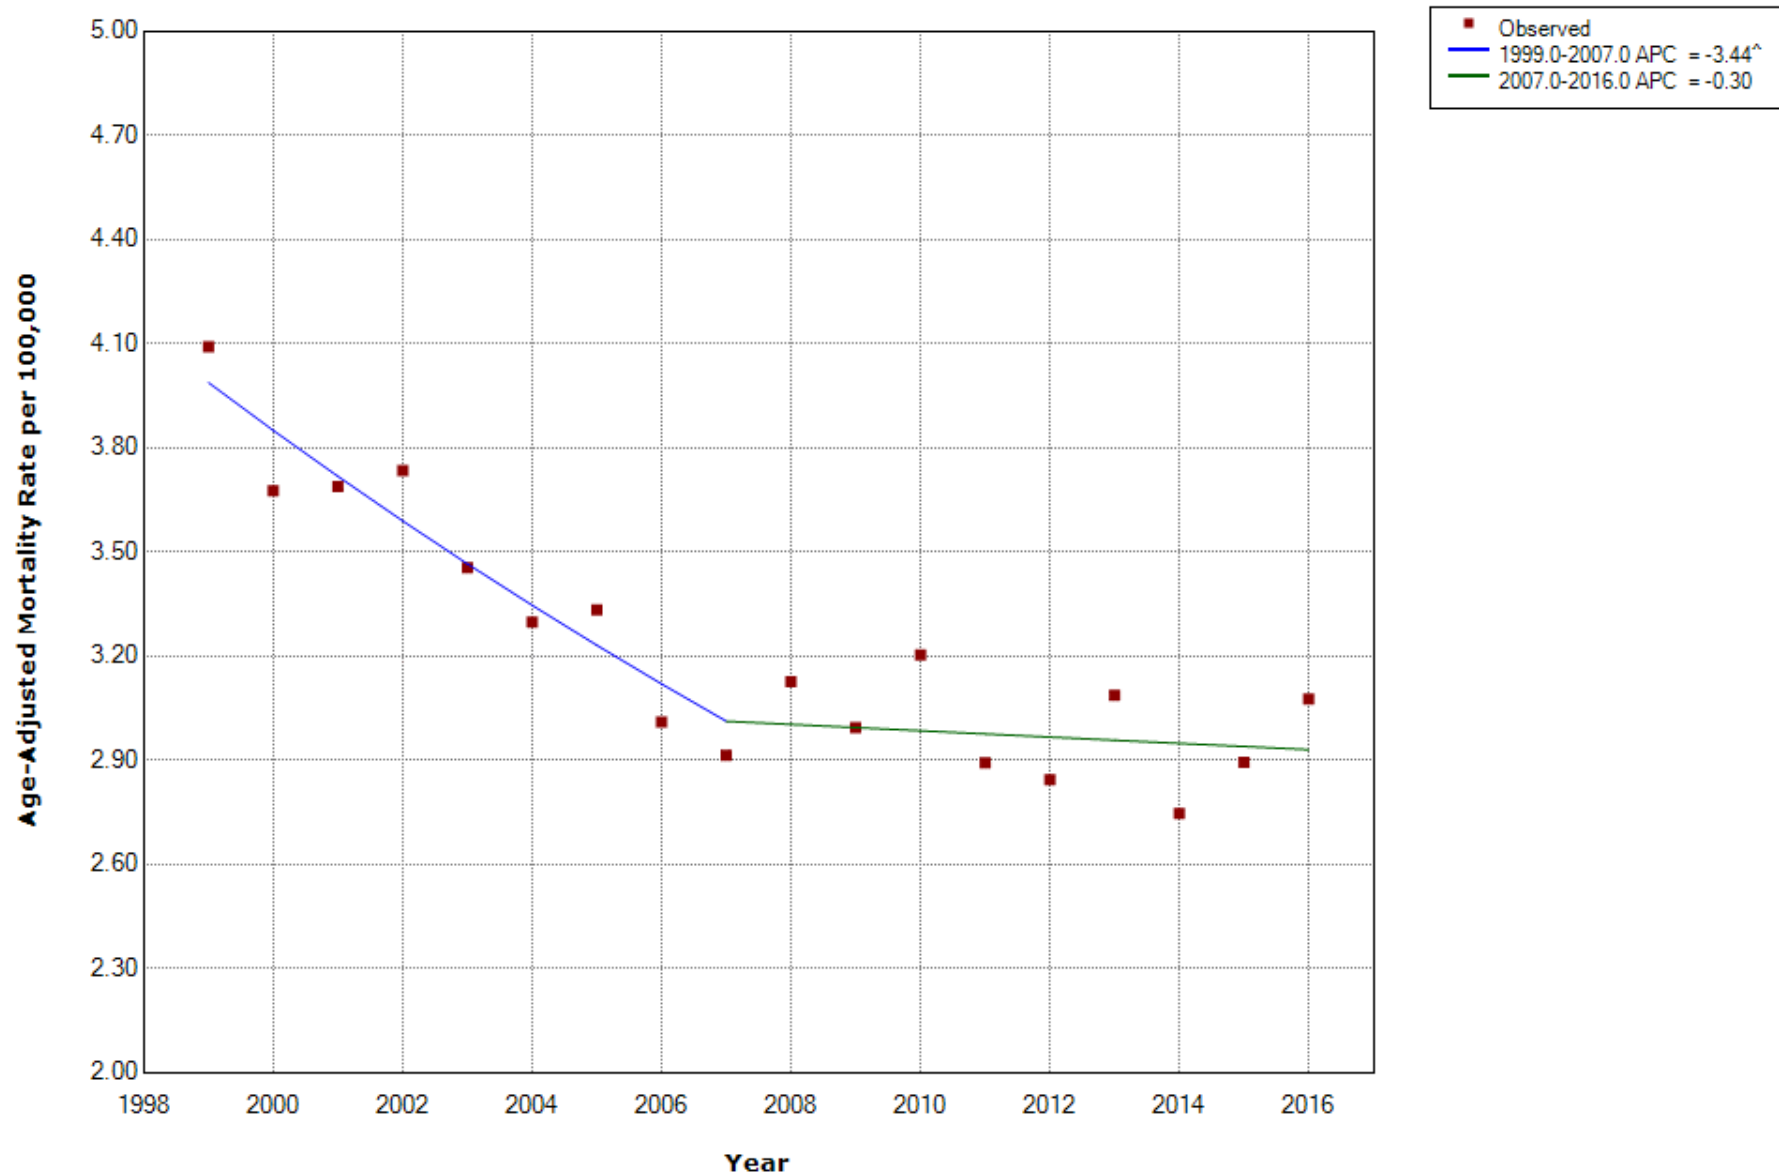

<sup>\*</sup> Indicates that the Annual Percent Change (APC) is significantly different from zero at the alpha = 0.05 level.  
Final Selected Model: 1 Joinpoint.

### Lung diseases due to external agents (J60-J70) / NH AIAN: Observed

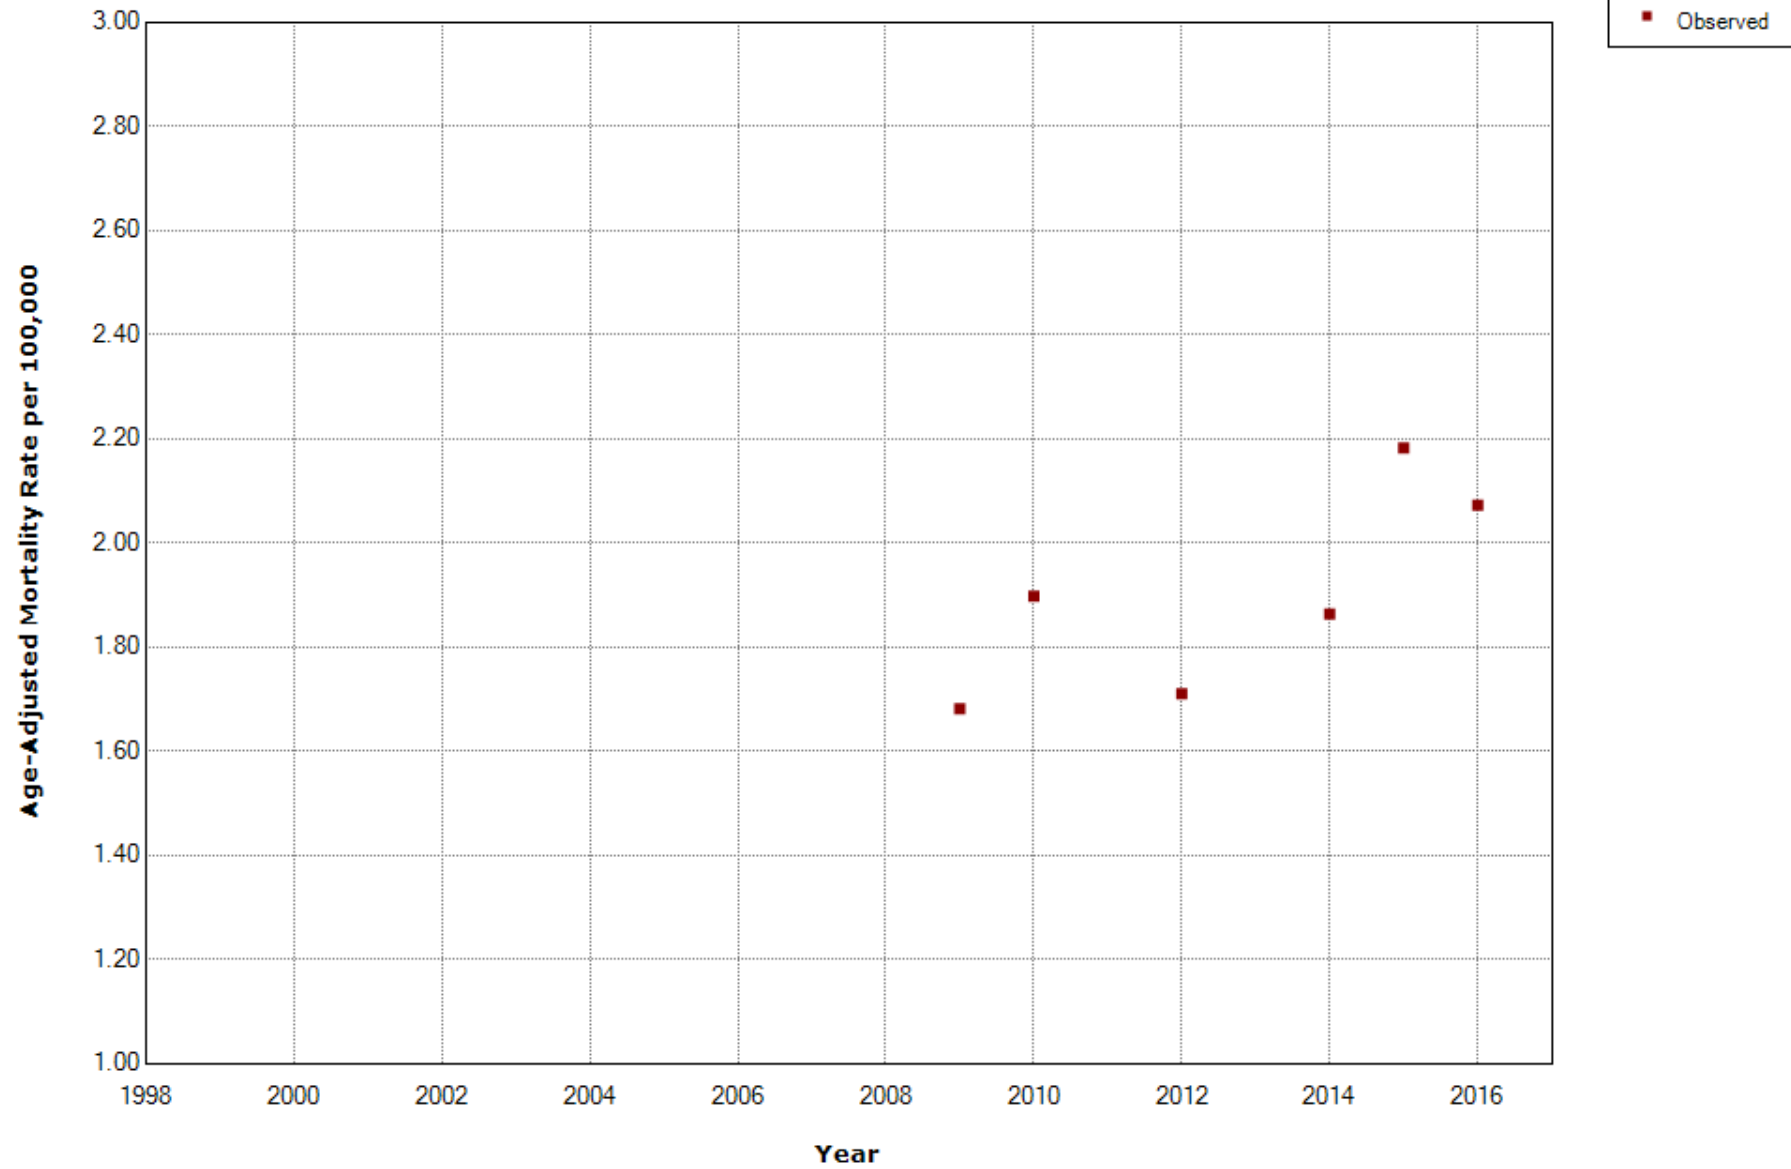

^ Indicates that the Annual Percent Change (APC) is significantly different from zero at the alpha = 0.05 level.

\* Joinpoint cannot process records with missing dependent variable values. Joinpoint will not analyze by-groups that have this error. (Row = 1350, Col = 1)

### Lung diseases due to external agents (J60-J70) / NH API: Observed

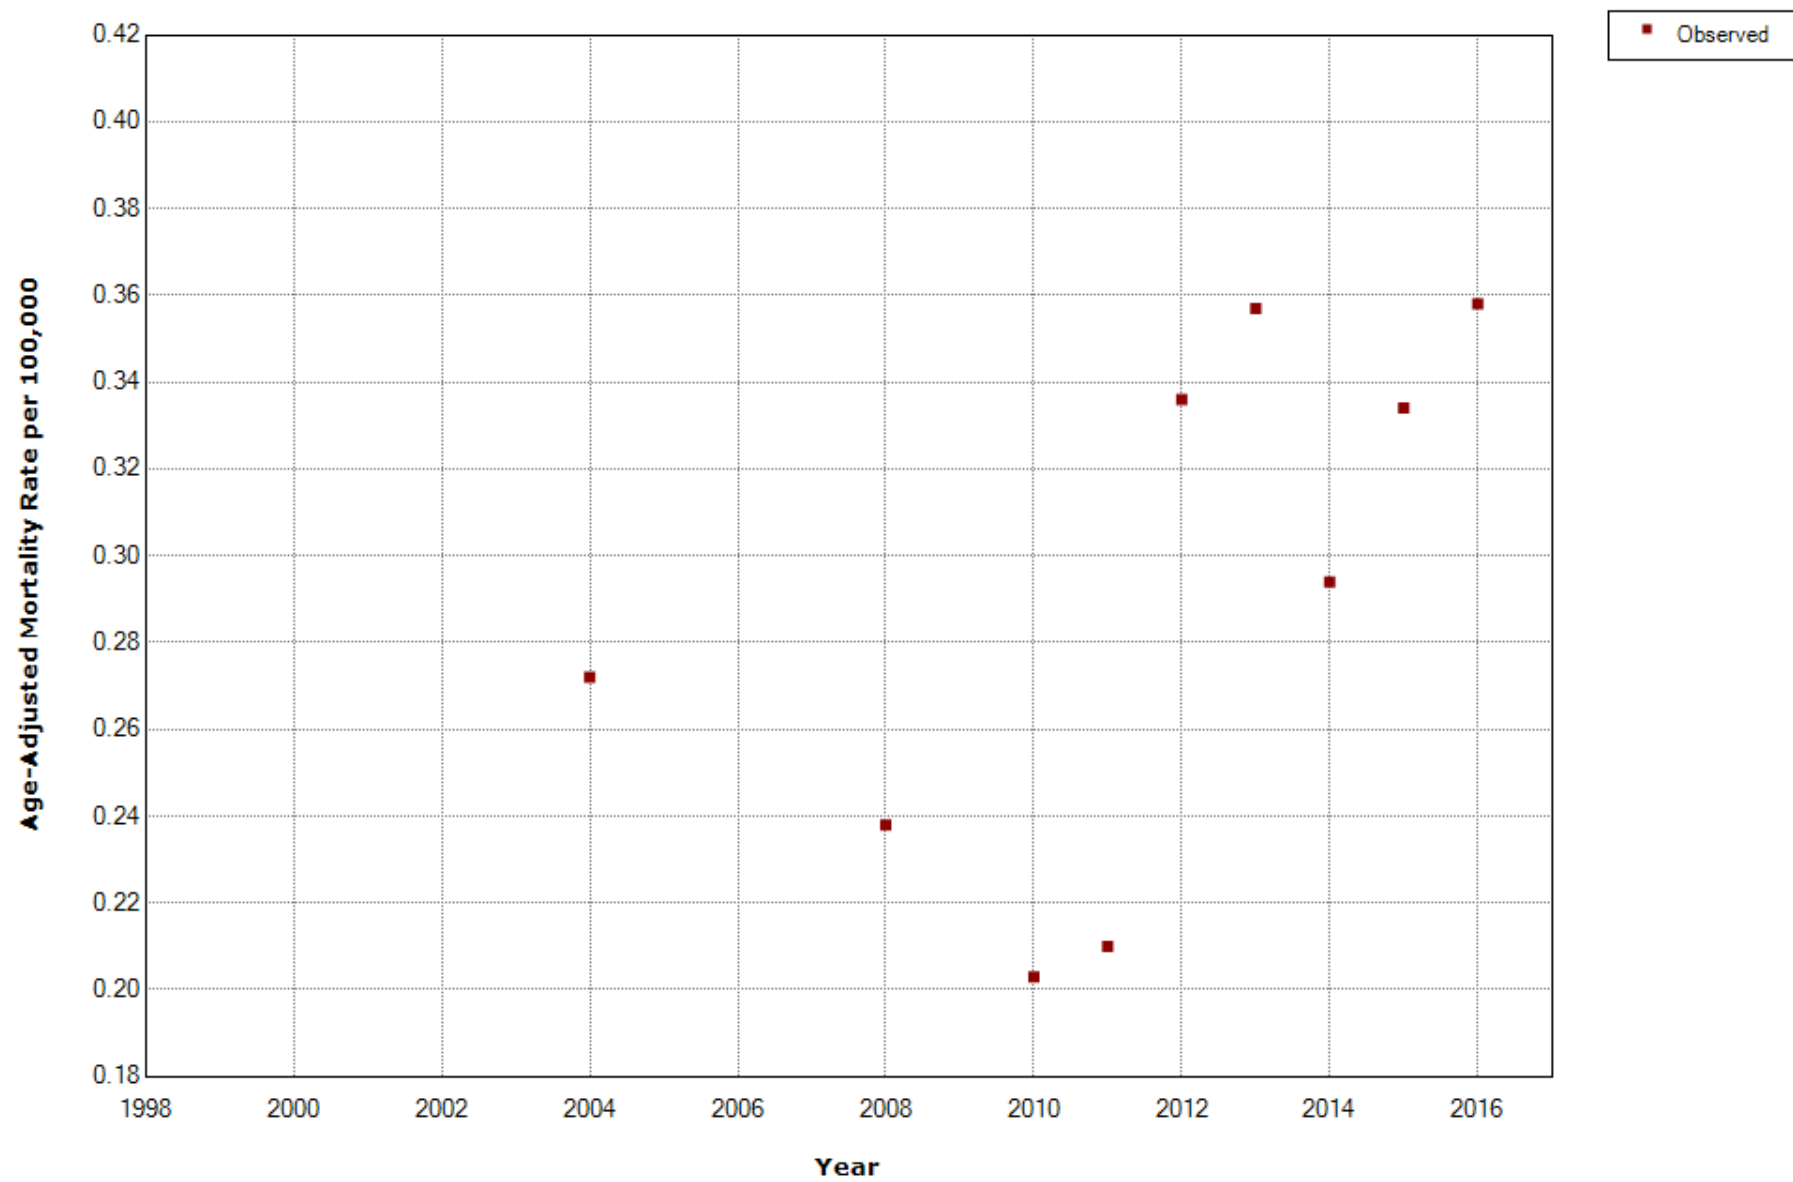

^ Indicates that the Annual Percent Change (APC) is significantly different from zero at the alpha = 0.05 level.

\* Joinpoint cannot process records with missing dependent variable values. Joinpoint will not analyze by-groups that have this error. (Row = 1368, Col = 1)

Lung diseases due to external agents (J60-J70) / NH Blacks: 1 Joinpoint

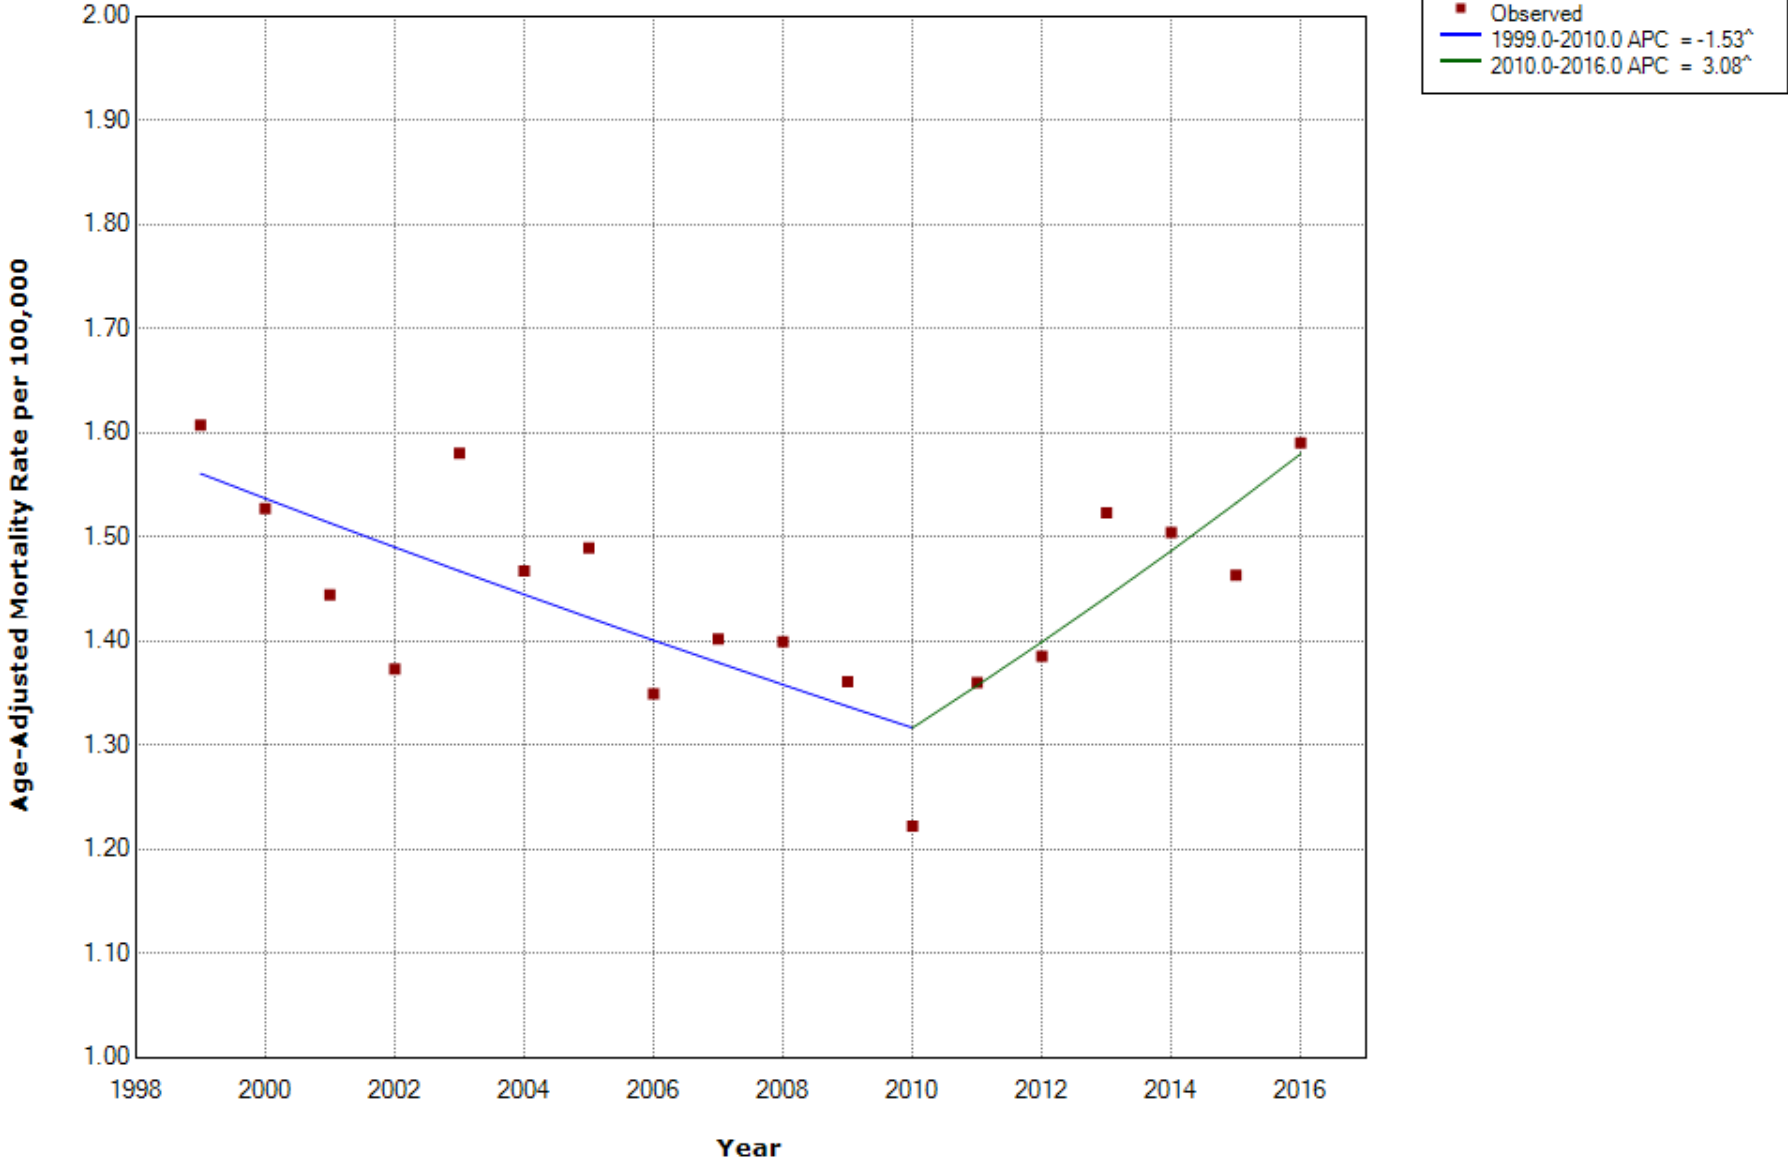

^ Indicates that the Annual Percent Change (APC) is significantly different from zero at the alpha = 0.05 level.  
Final Selected Model: 1 Joinpoint.

Lung diseases due to external agents (J60-J70) / NH whites: 0 Joinpoints

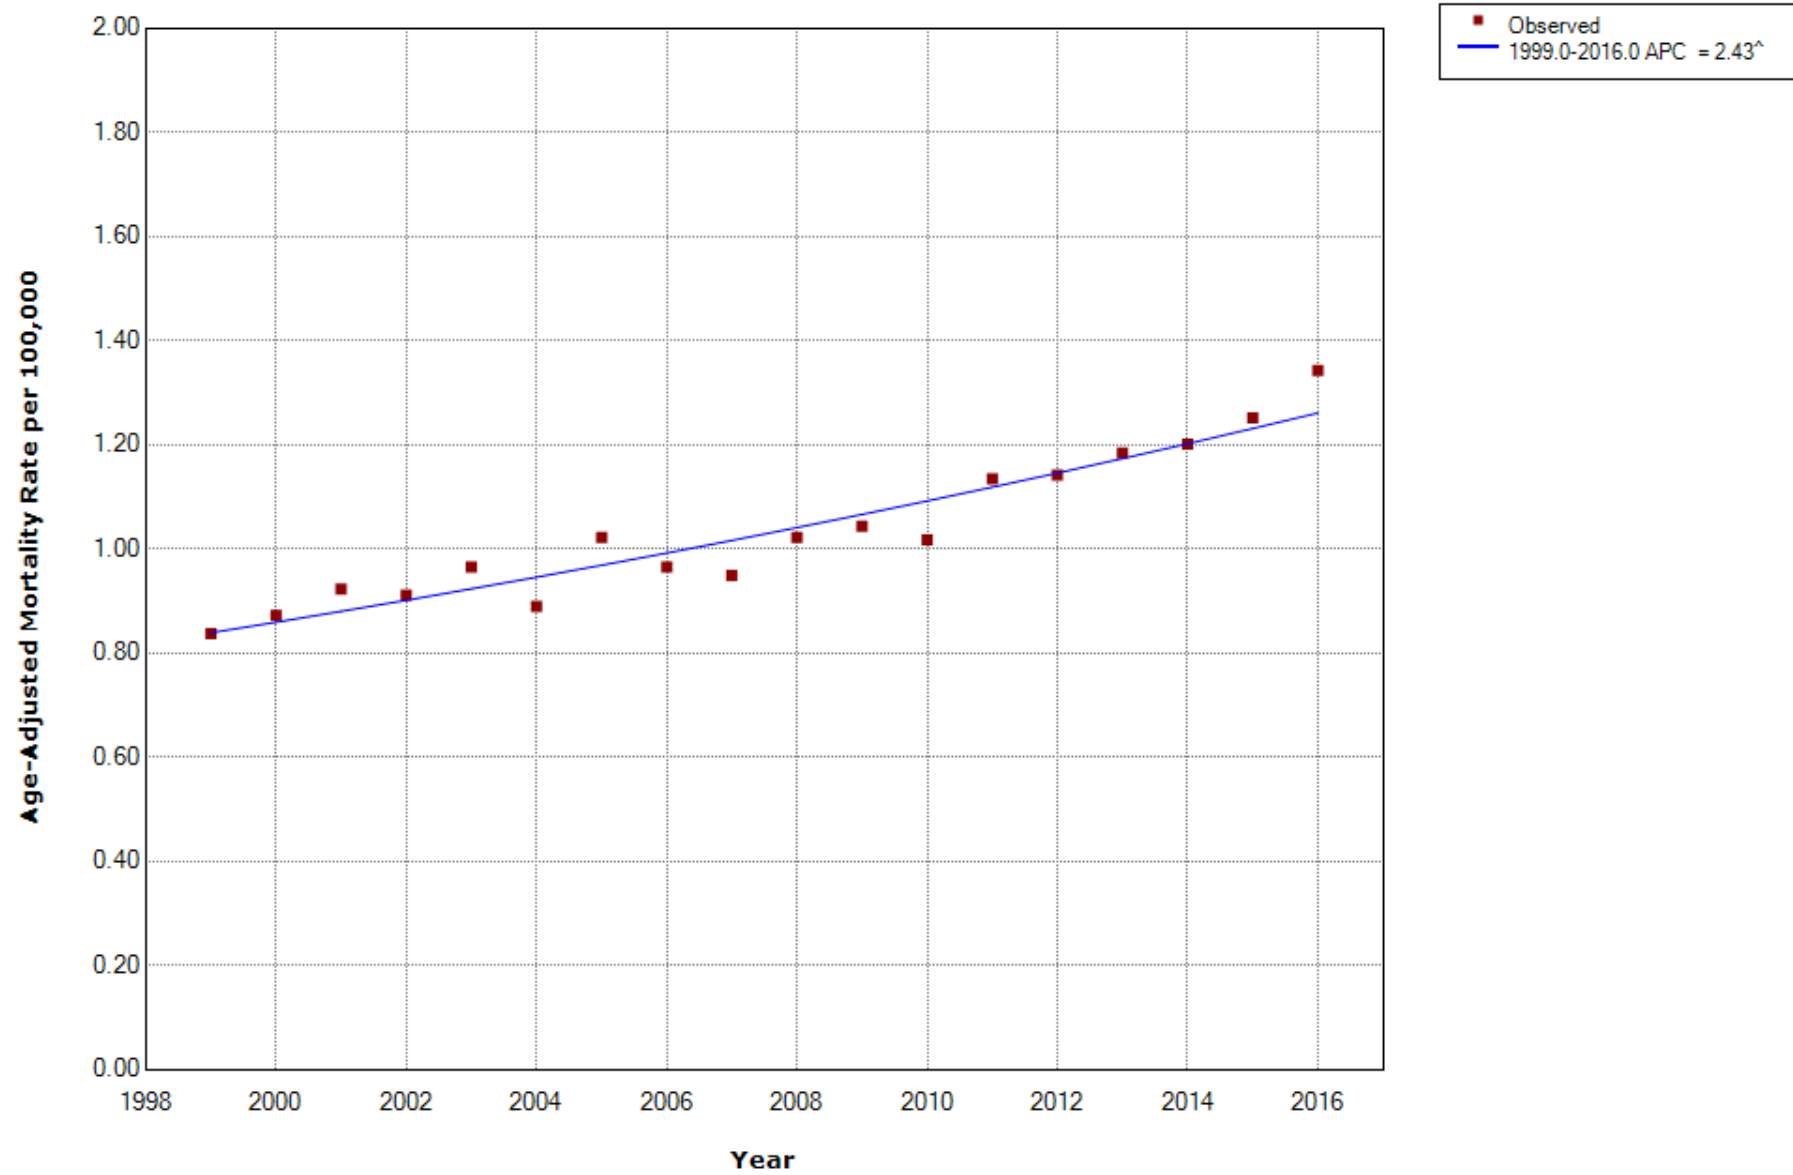

^ Indicates that the Annual Percent Change (APC) is significantly different from zero at the alpha = 0.05 level.  
Final Selected Model: 0 Joinpoints.

Lung diseases due to external agents (J60-J70) / Hispanics: 0 Joinpoints

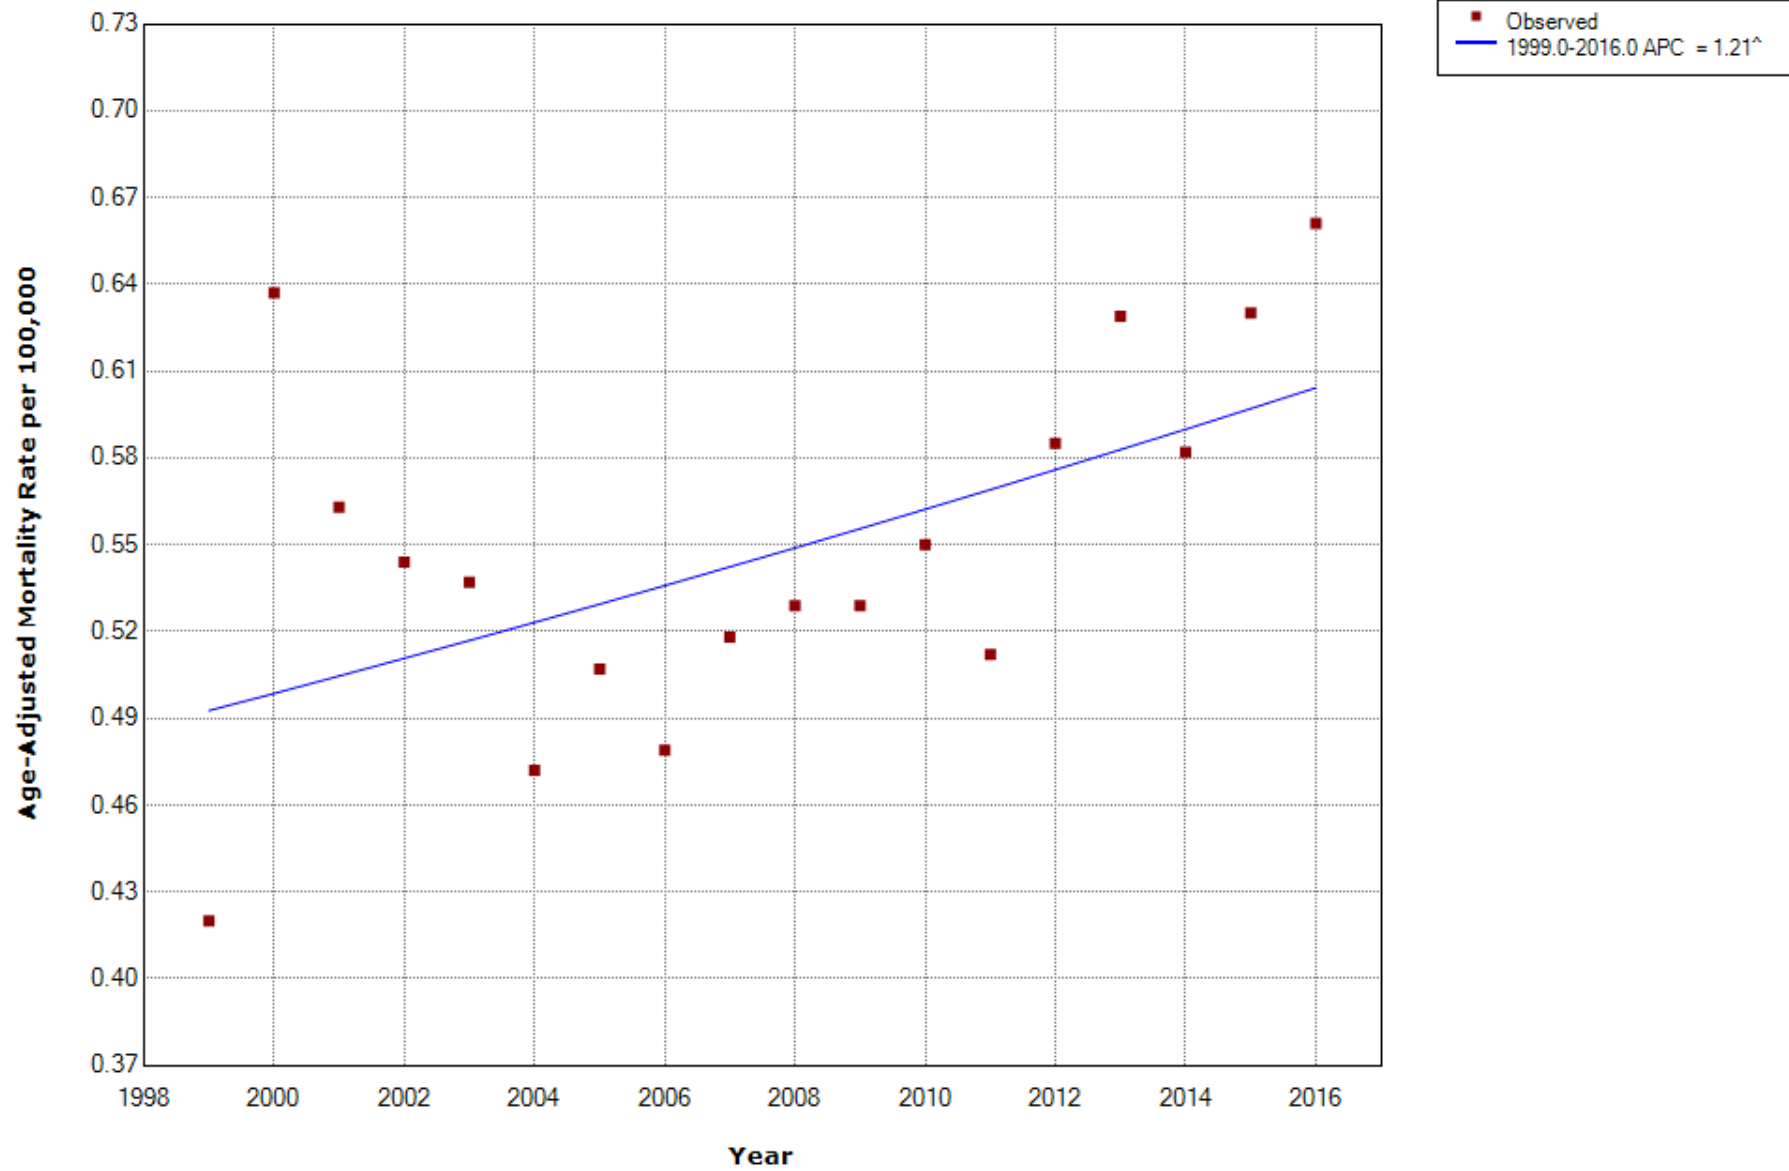

^ Indicates that the Annual Percent Change (APC) is significantly different from zero at the alpha = 0.05 level.  
Final Selected Model: 0 Joinpoints.

### Diabetes mellitus (E10-E14) / NH AIAN: 1 Joinpoint

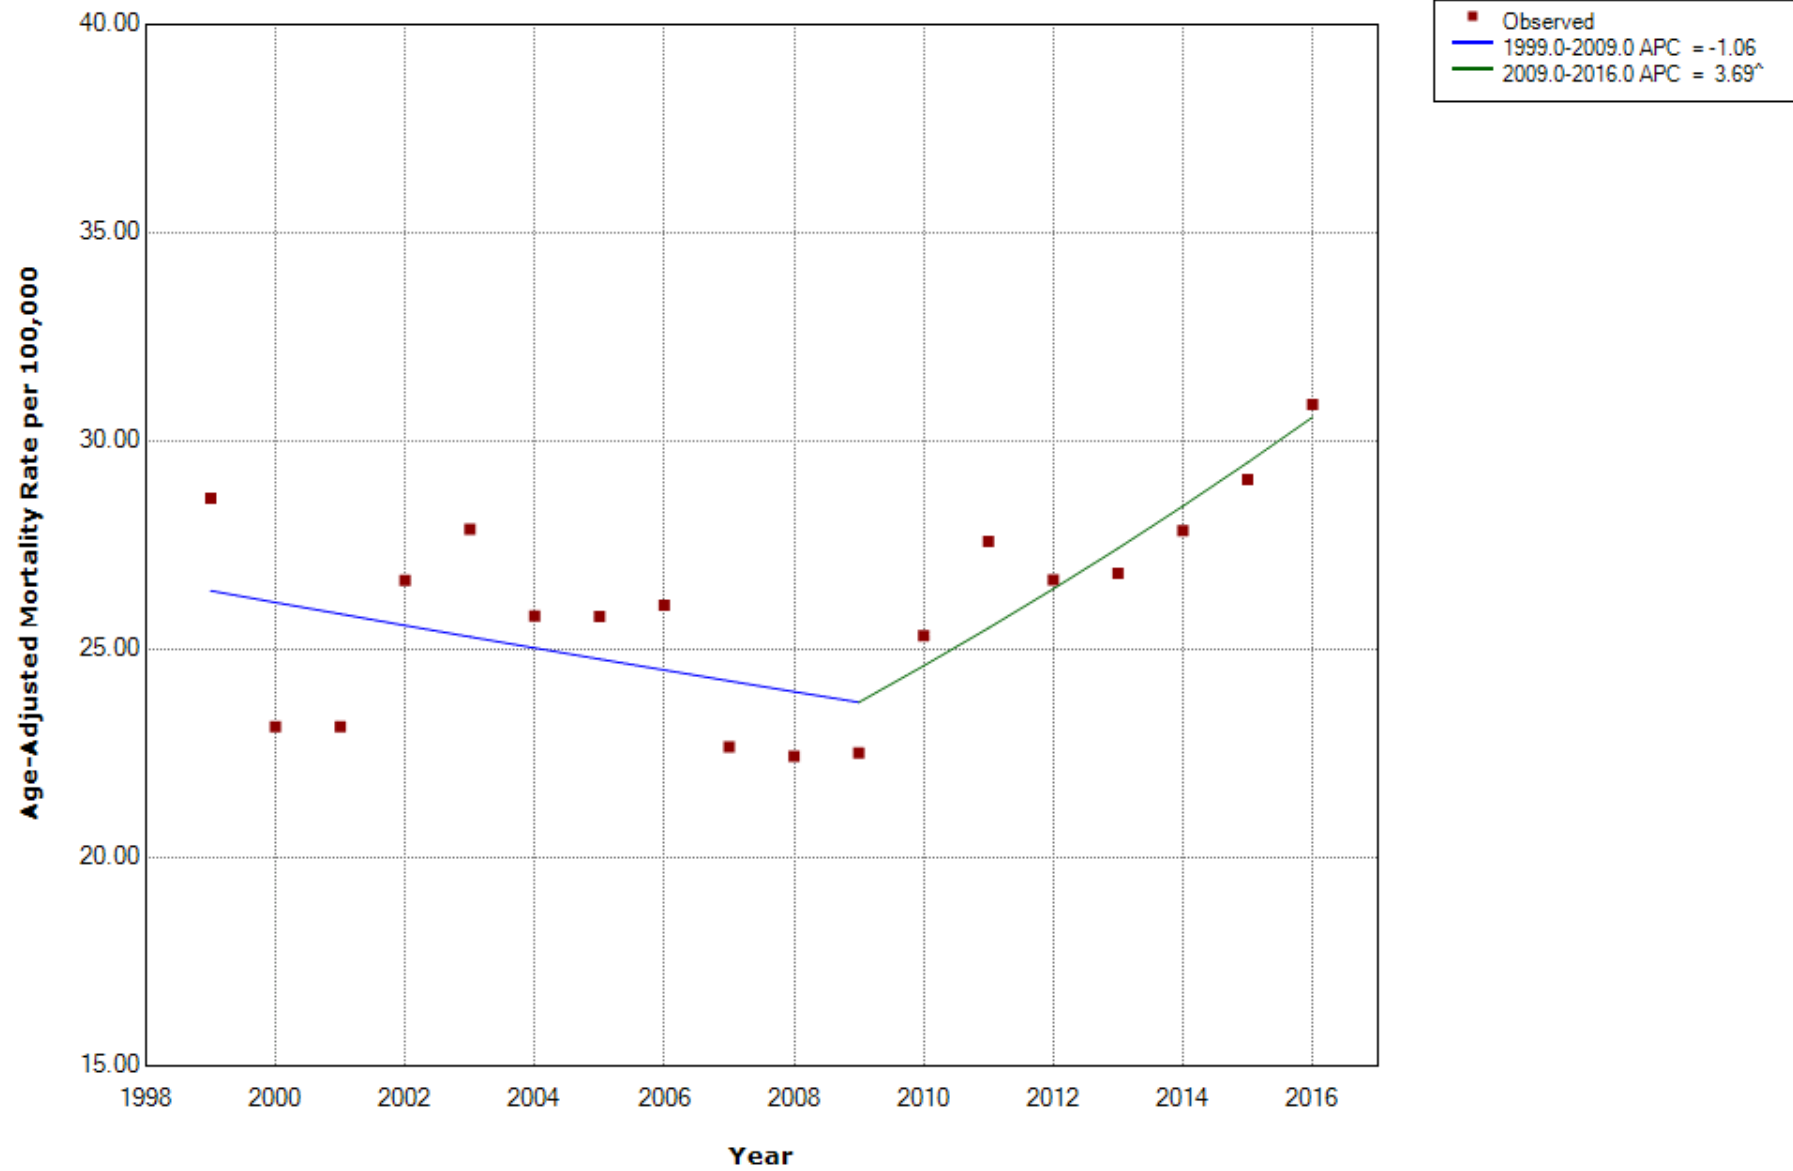

^ Indicates that the Annual Percent Change (APC) is significantly different from zero at the alpha = 0.05 level.  
Final Selected Model: 1 Joinpoint.



### Diabetes mellitus (E10-E14) / NH API: 0 Joinpoints

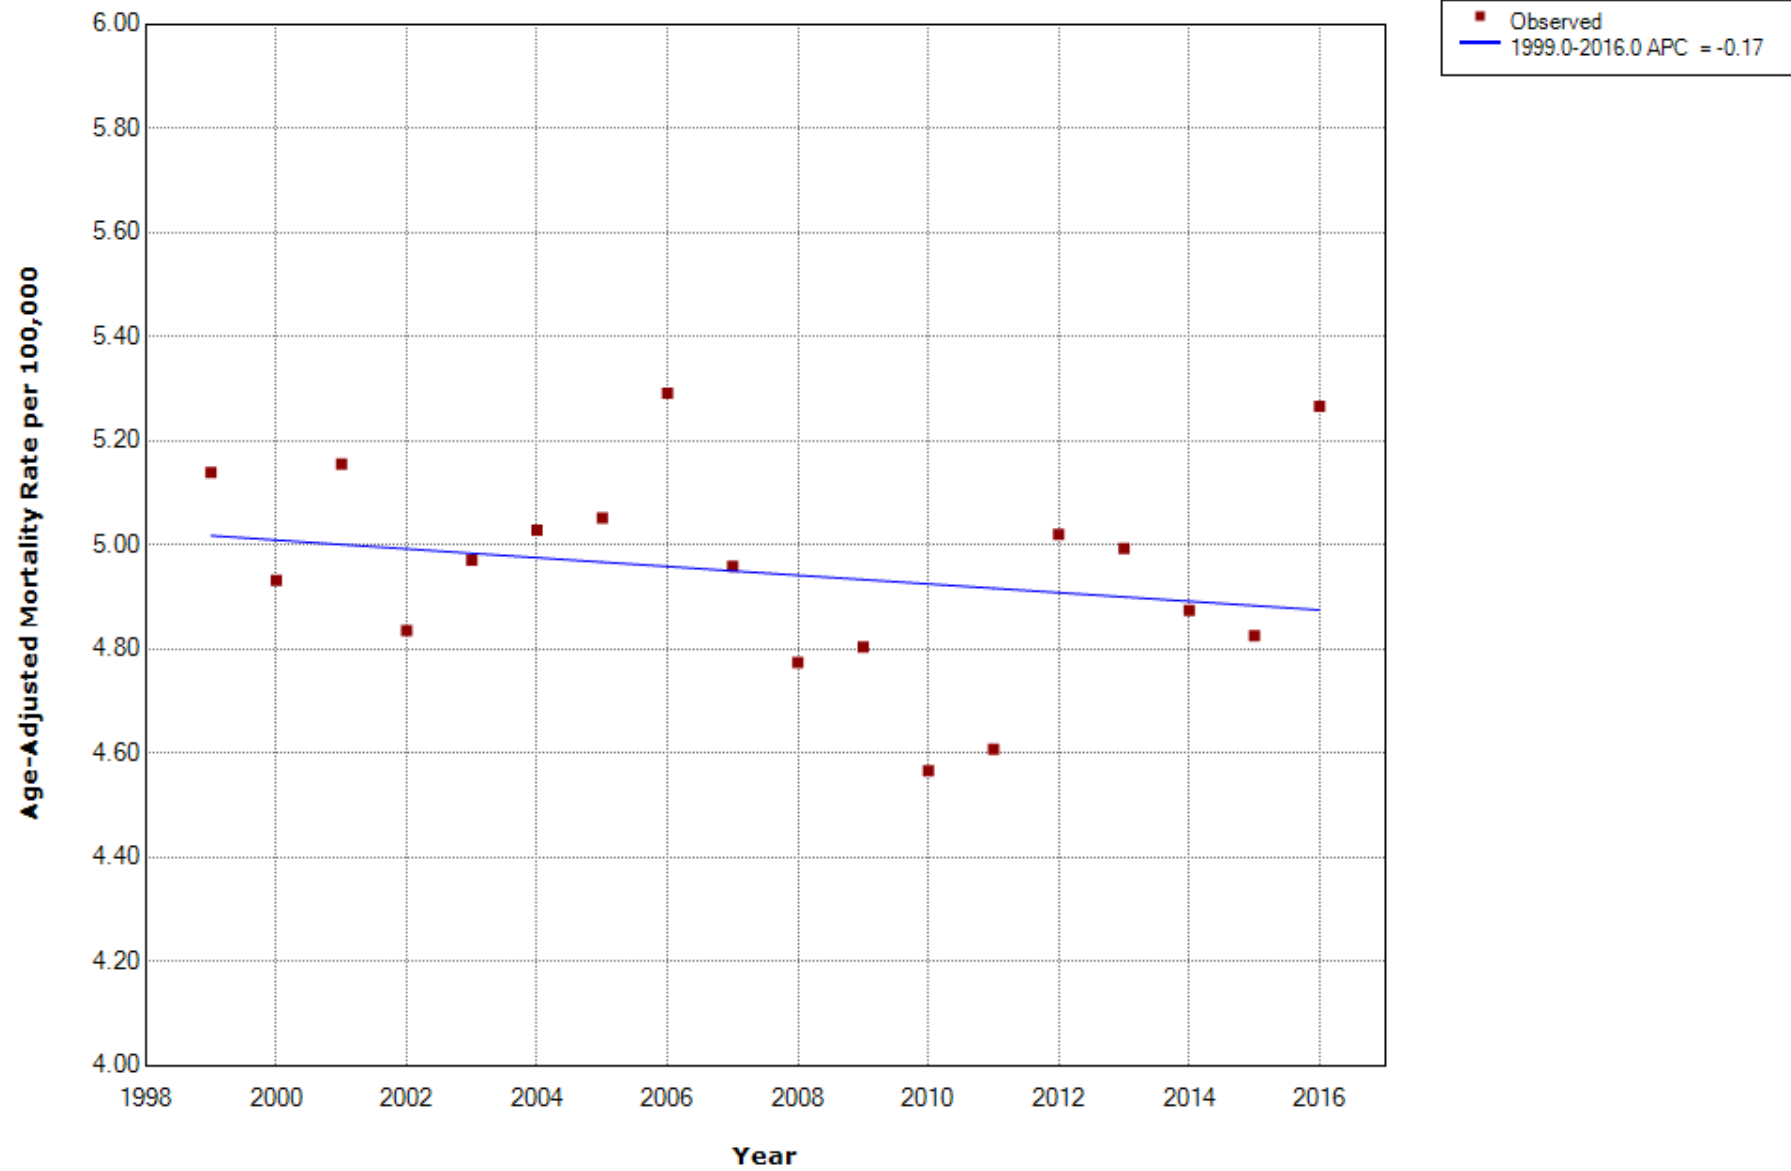

^ Indicates that the Annual Percent Change (APC) is significantly different from zero at the alpha = 0.05 level.  
Final Selected Model: 0 Joinpoints.

### Diabetes mellitus (E10-E14) / NH Blacks: 2 Joinpoints

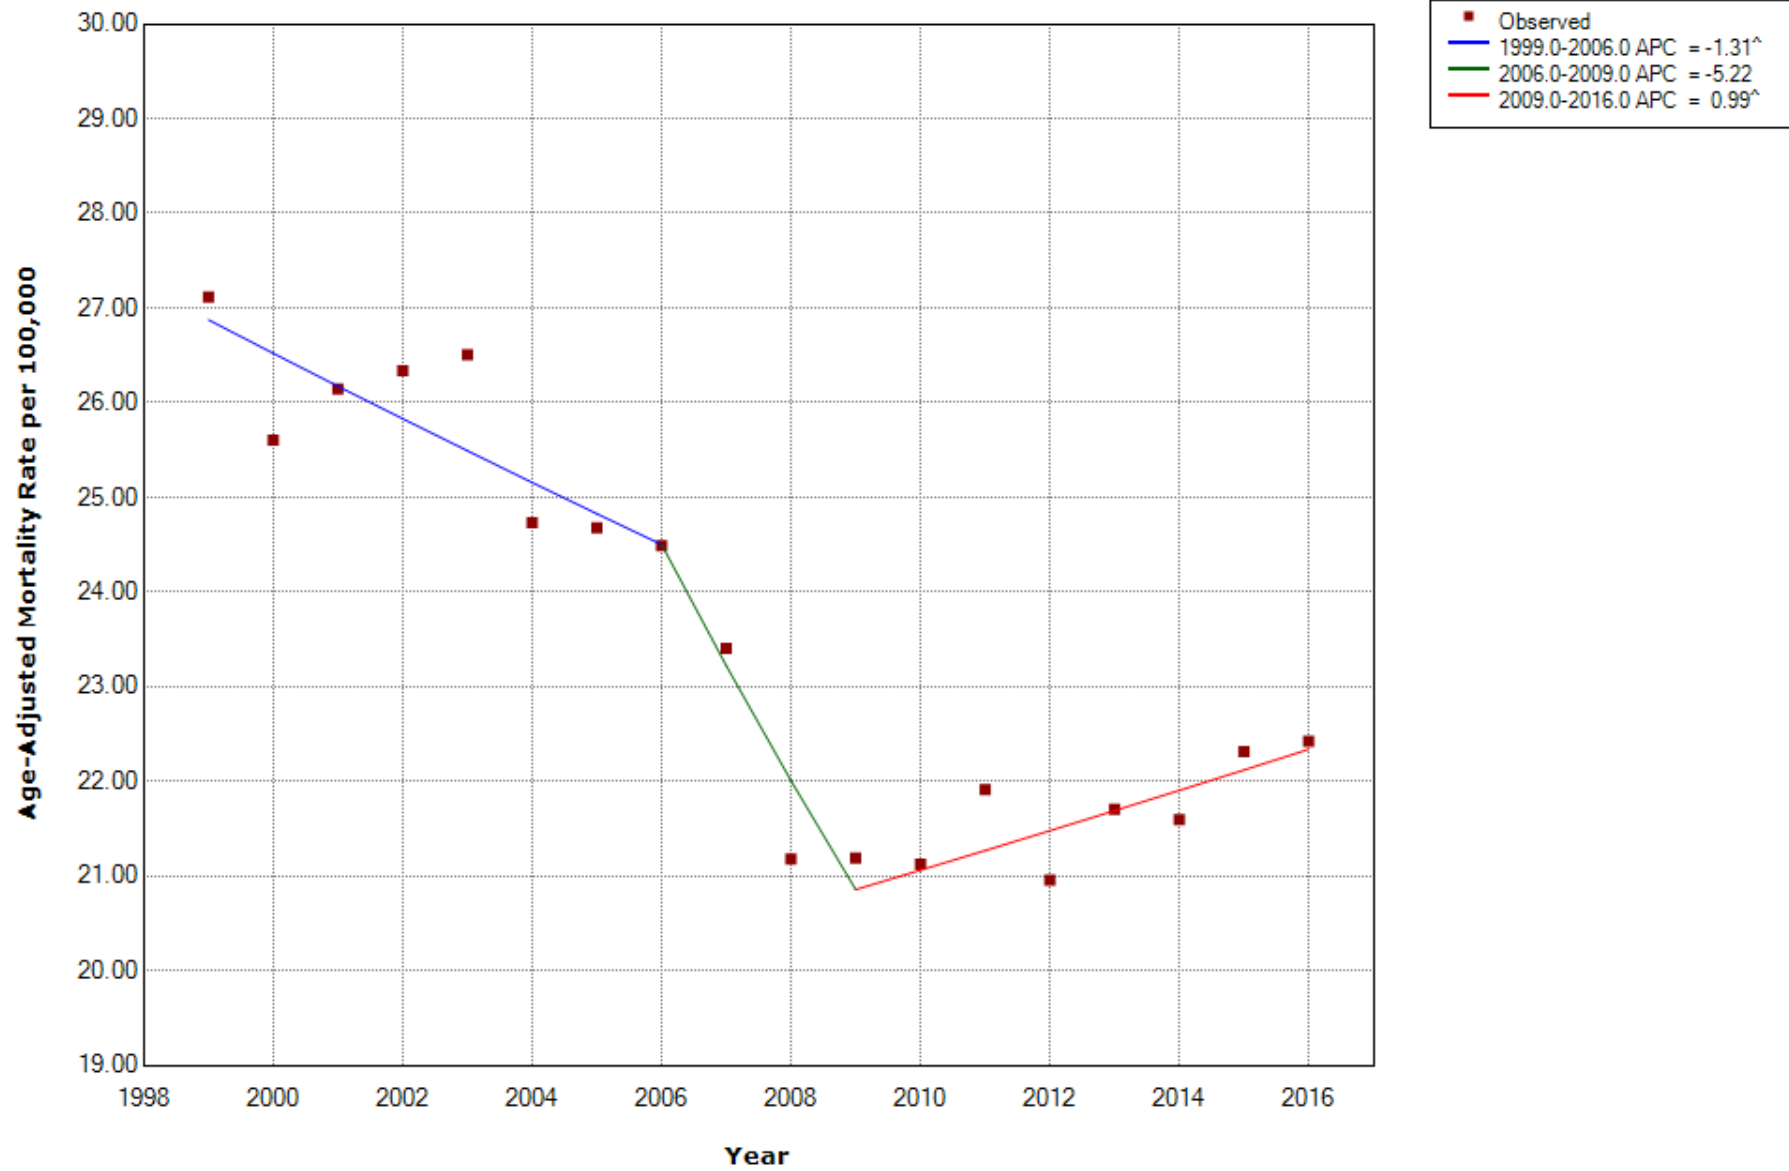

<sup>^</sup> Indicates that the Annual Percent Change (APC) is significantly different from zero at the alpha = 0.05 level.  
Final Selected Model: 2 Joinpoints.

### Diabetes mellitus (E10-E14) / NH whites: 2 Joinpoints

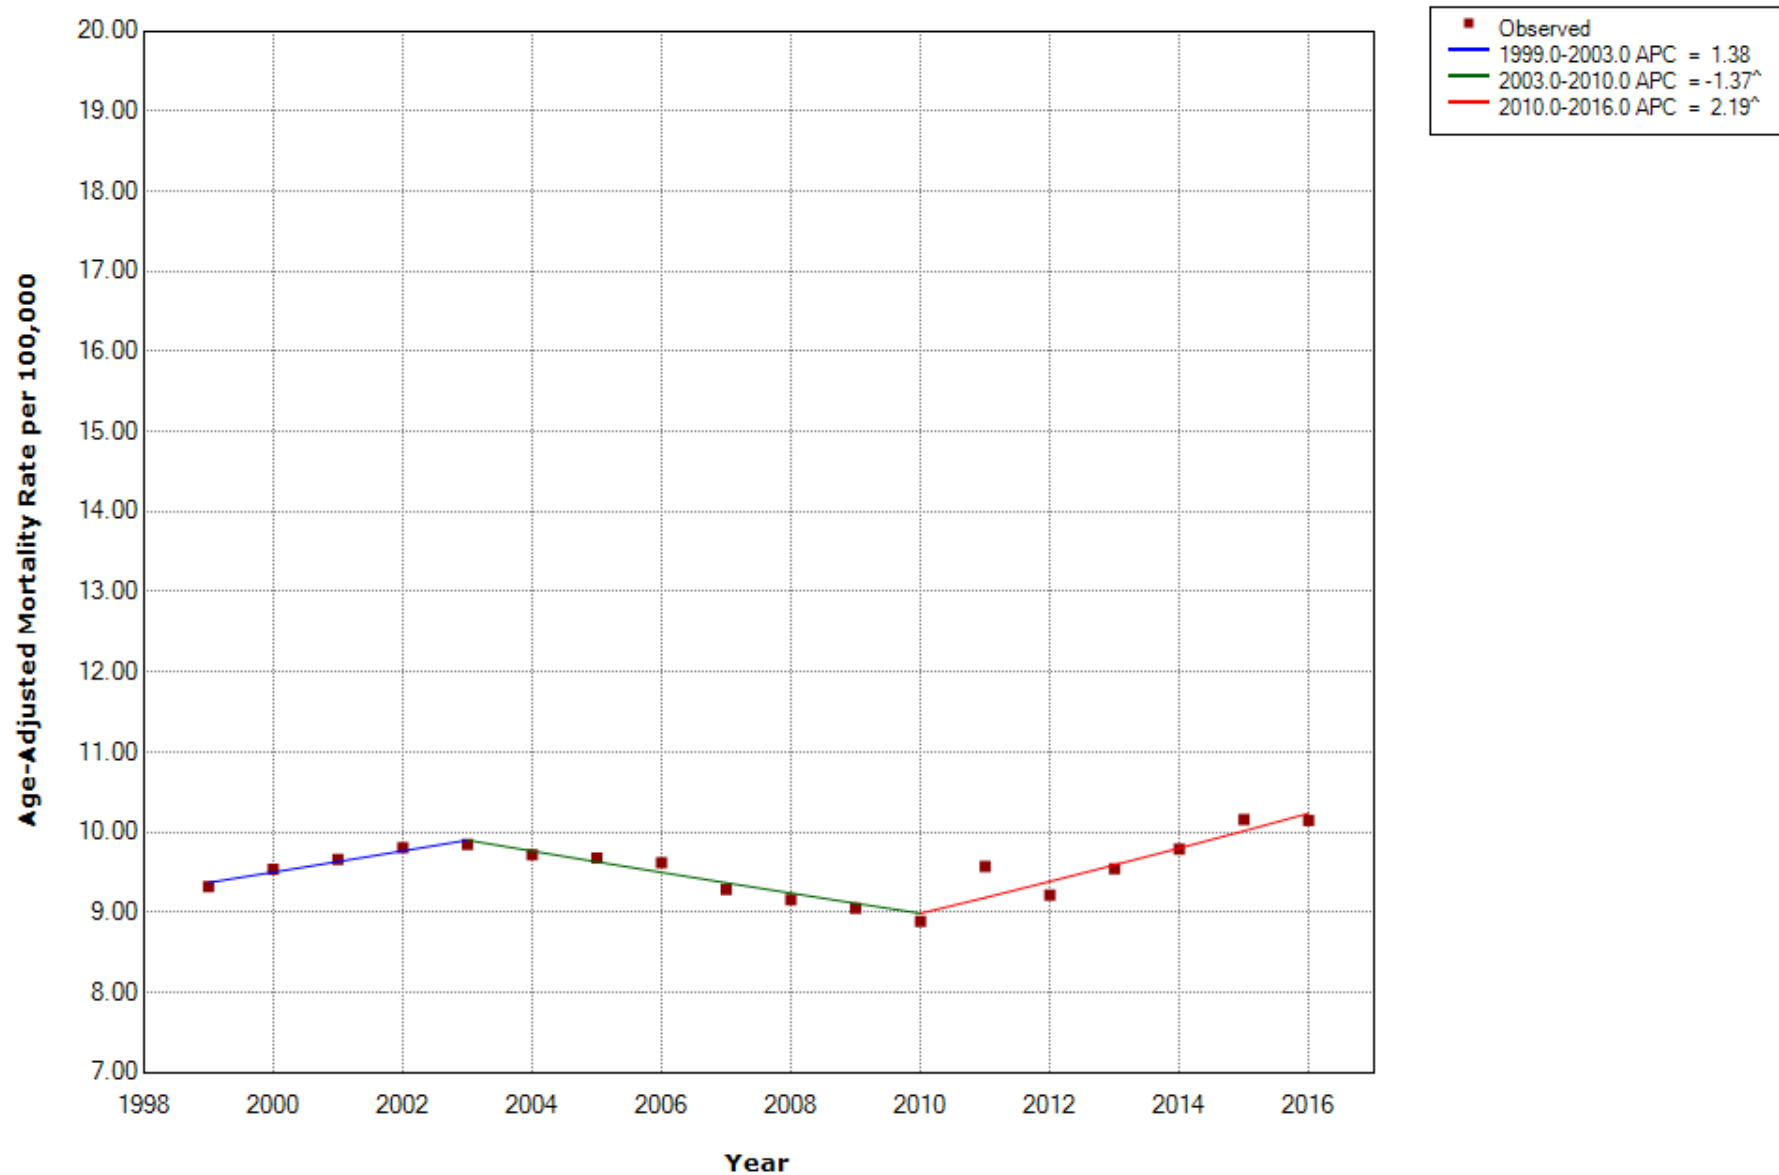

^ Indicates that the Annual Percent Change (APC) is significantly different from zero at the alpha = 0.05 level.  
Final Selected Model: 2 Joinpoints.

### Diabetes mellitus (E10-E14) / Hispanics: 2 Joinpoints

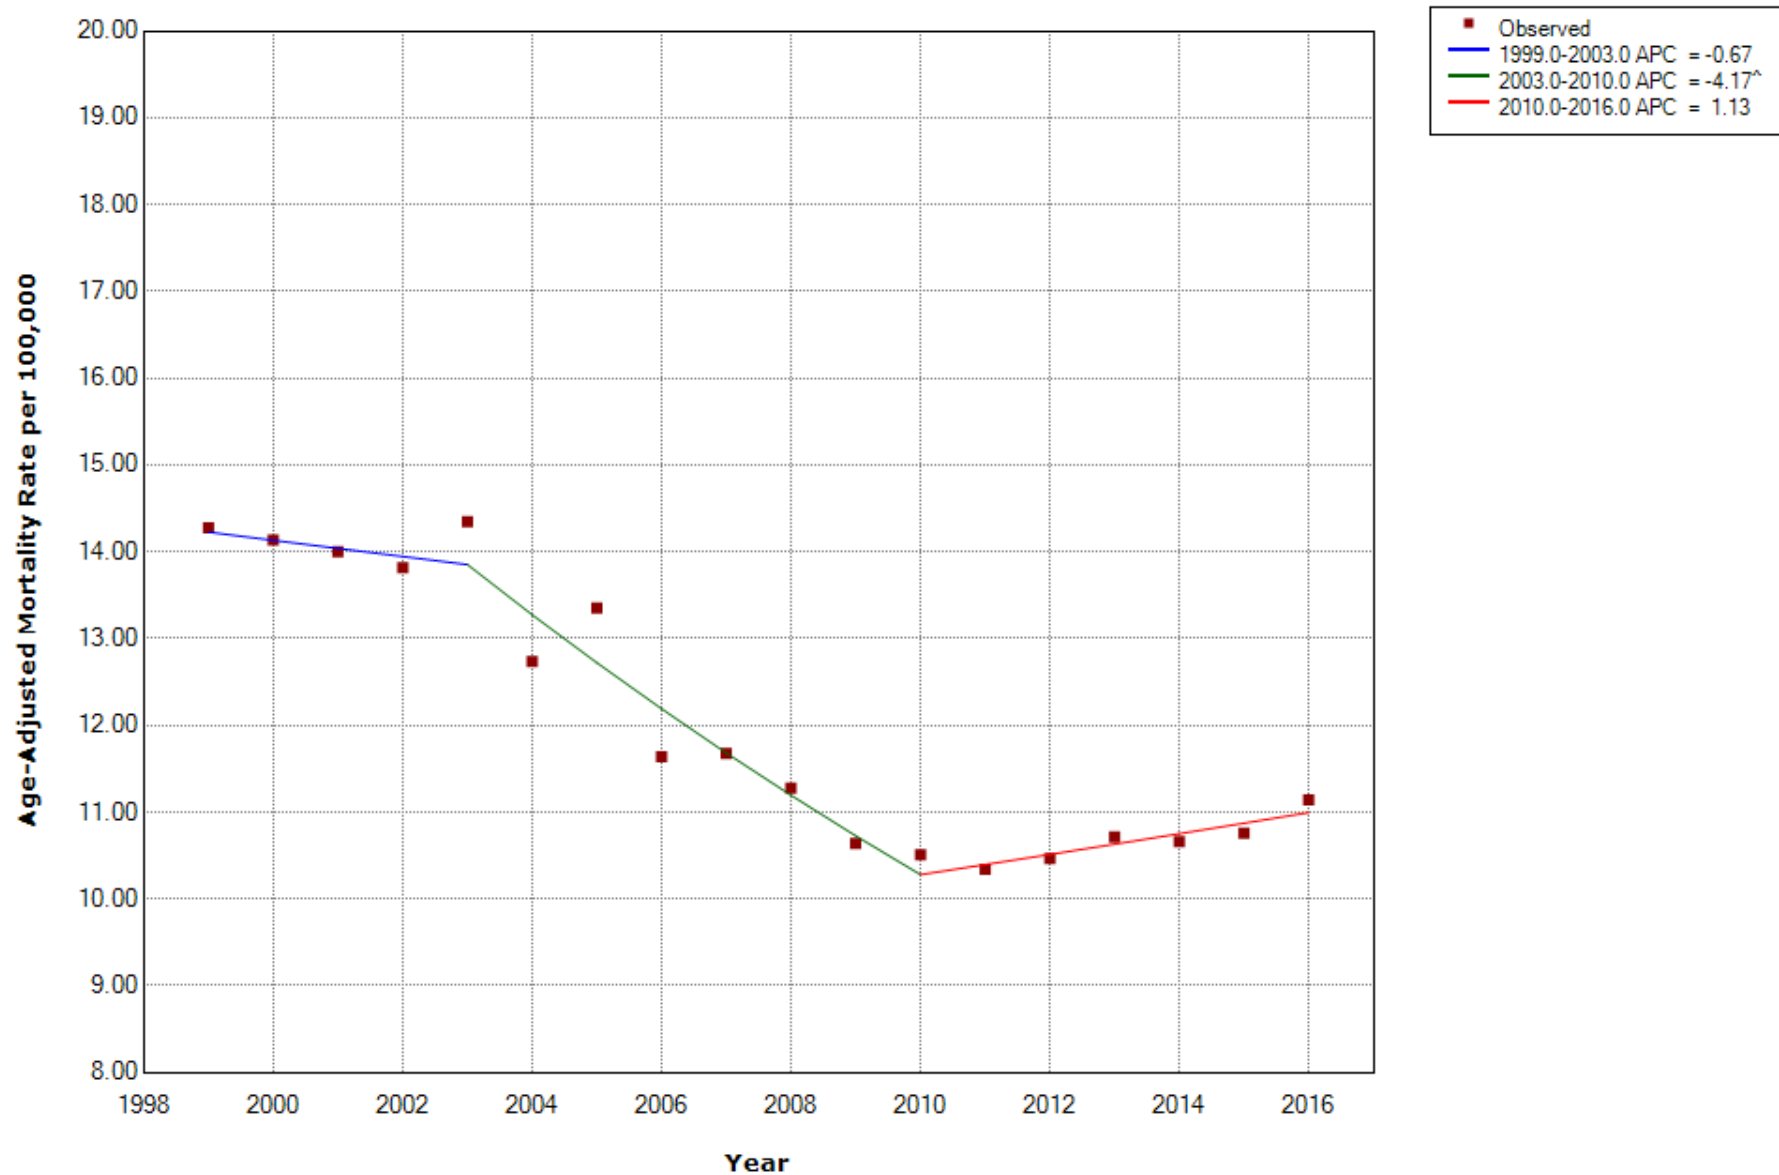

<sup>^</sup> Indicates that the Annual Percent Change (APC) is significantly different from zero at the alpha = 0.05 level.  
Final Selected Model: 2 Joinpoints.

### Obesity (E65-E68) / NH AIAN: Observed

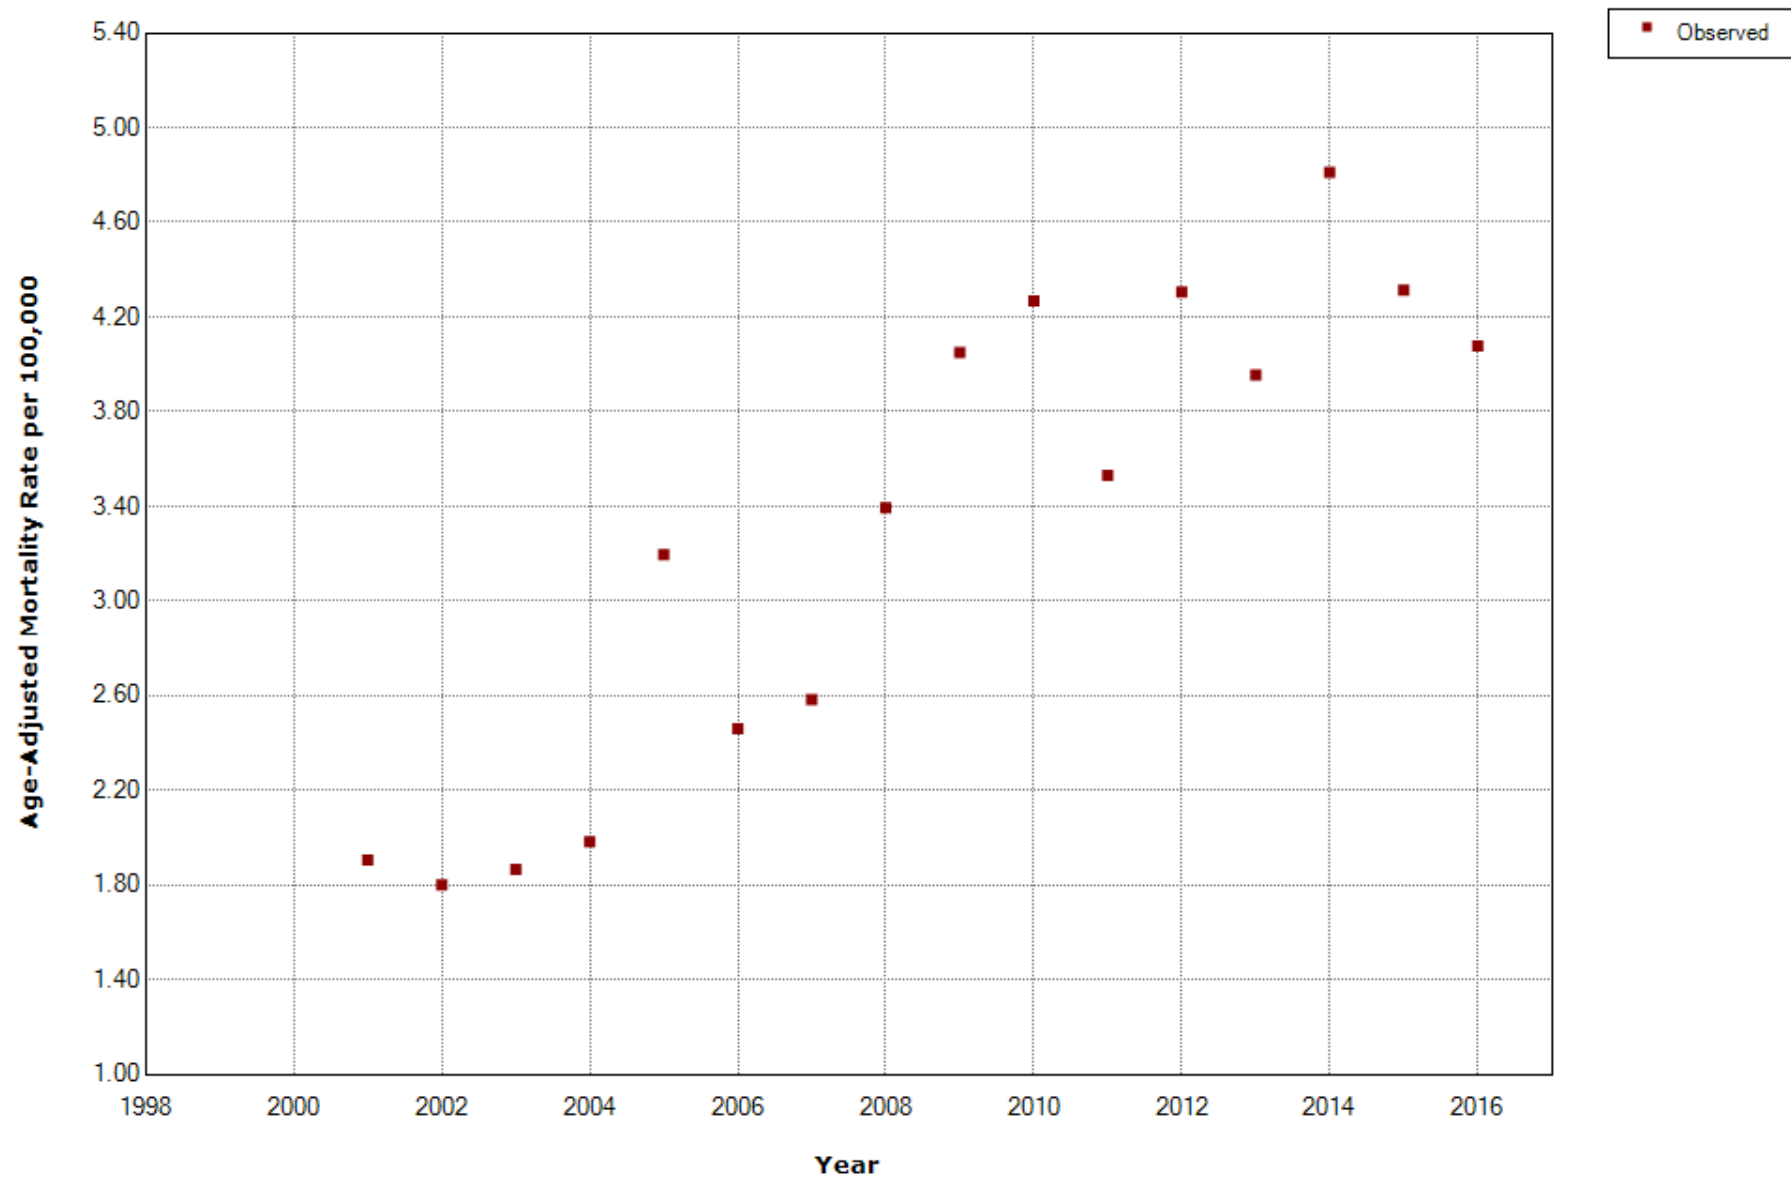

^ Indicates that the Annual Percent Change (APC) is significantly different from zero at the alpha = 0.05 level.

\* Joinpoint cannot process records with missing dependent variable values. Joinpoint will not analyze by-groups that have this error. (Row = 1530, Col = 1)

### Obesity (E65-E68) / NH API: Observed

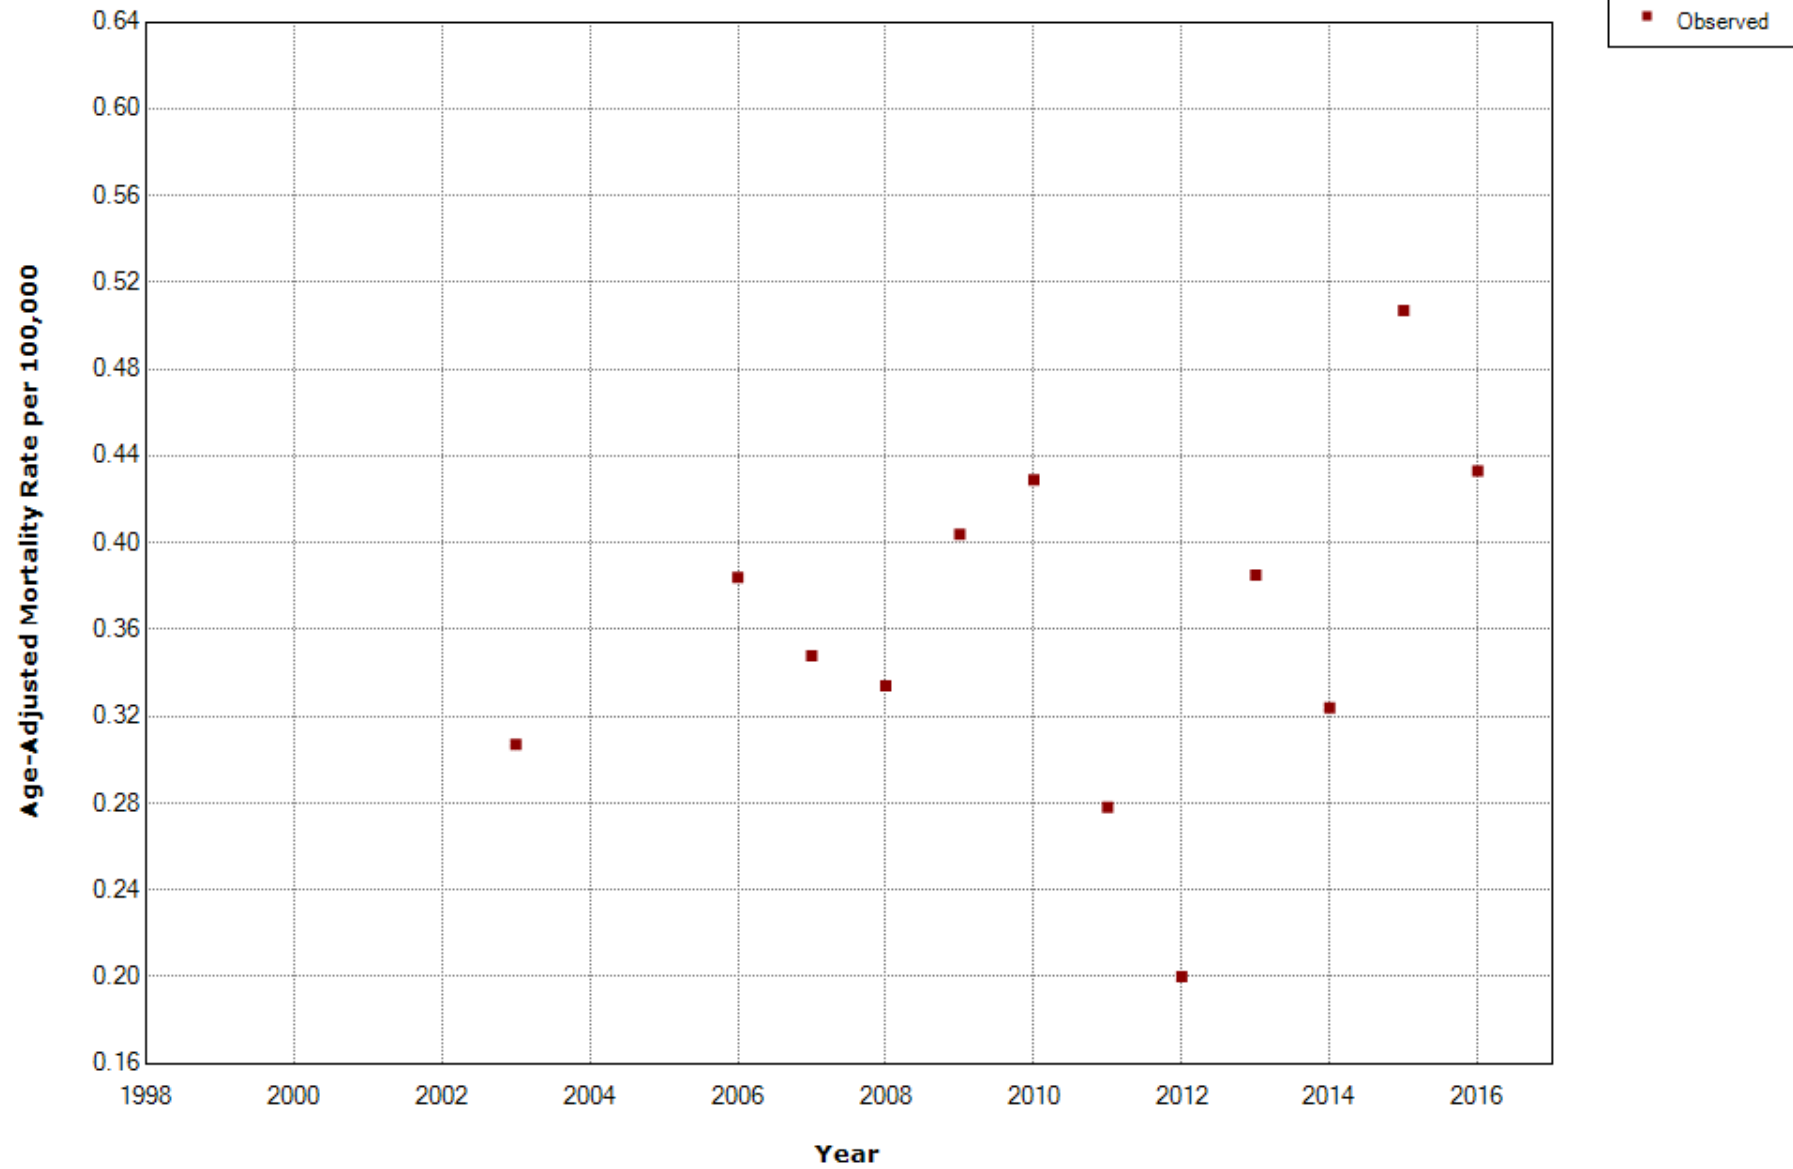

^ Indicates that the Annual Percent Change (APC) is significantly different from zero at the alpha = 0.05 level.

\* Joinpoint cannot process records with missing dependent variable values. Joinpoint will not analyze by-groups that have this error. (Row = 1548, Col = 1)

### Obesity (E65-E68) / NH Blacks: 2 Joinpoints

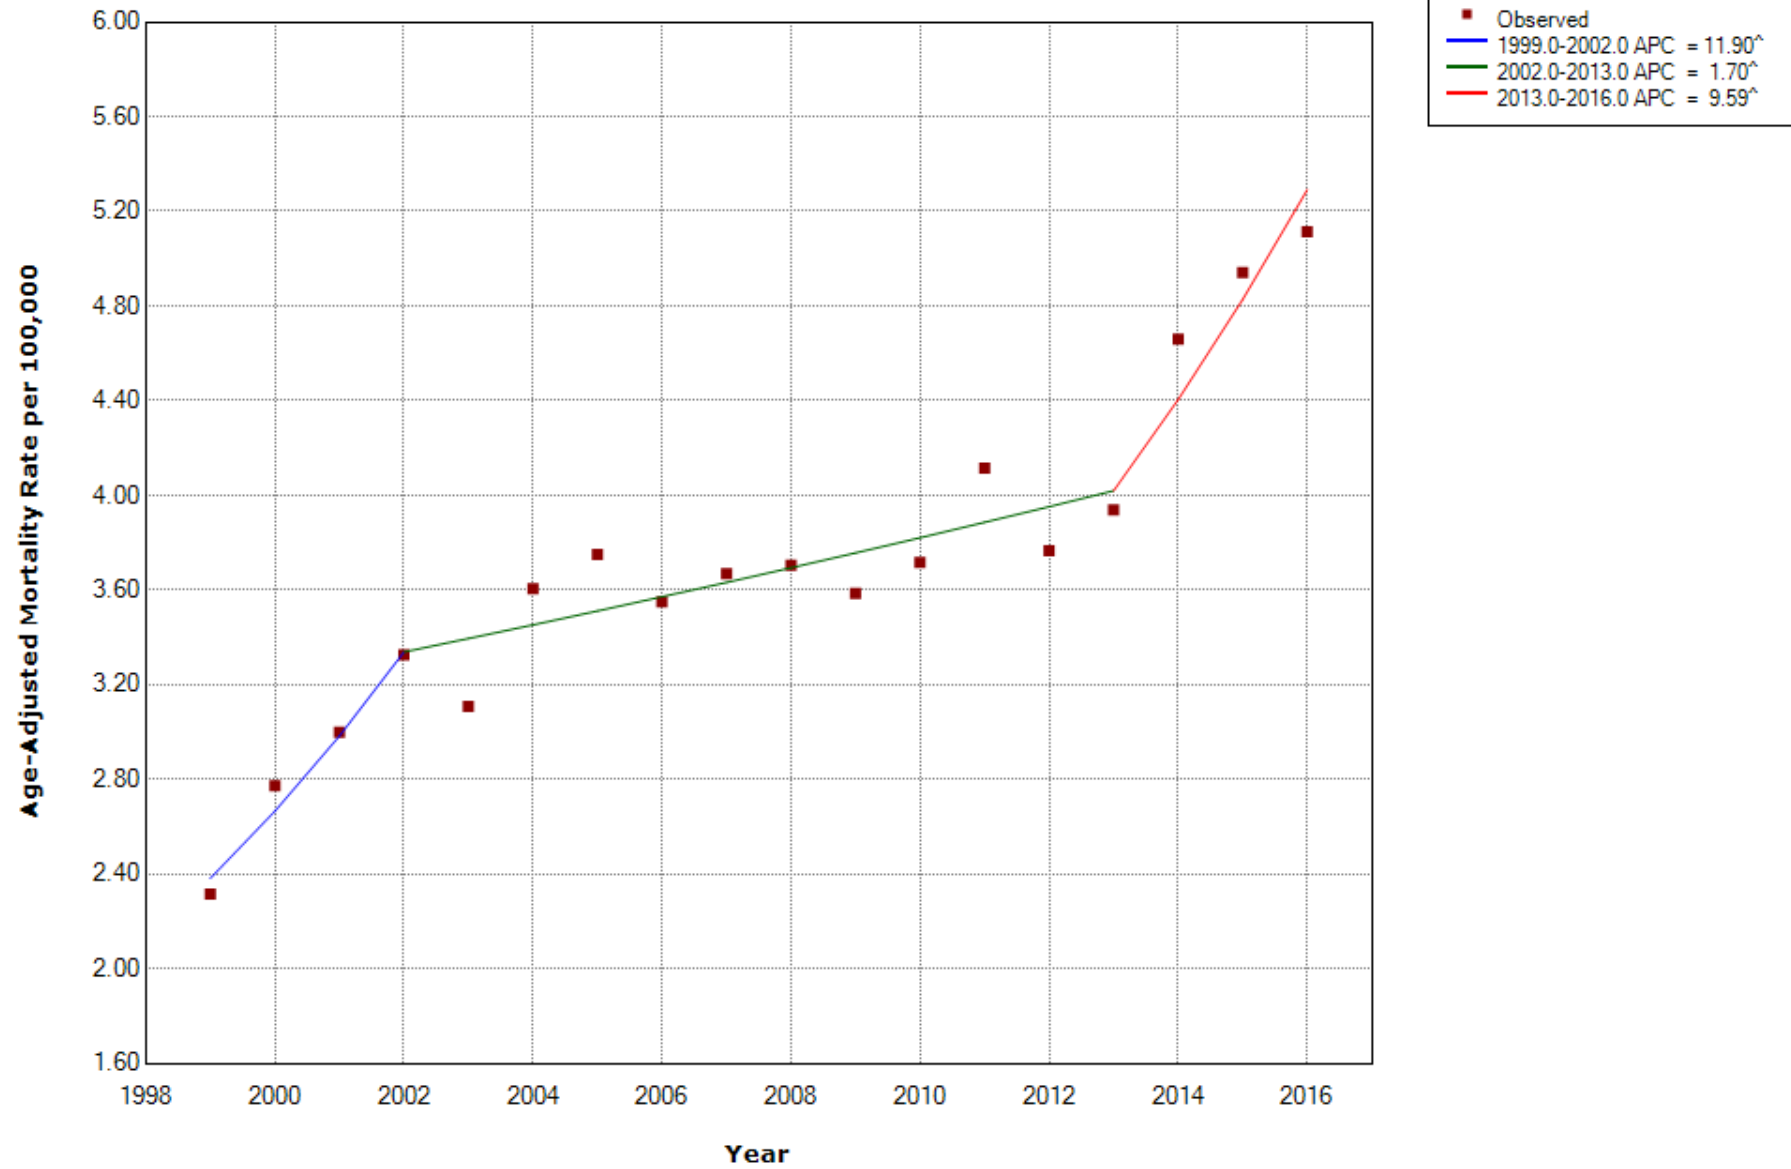

^ Indicates that the Annual Percent Change (APC) is significantly different from zero at the alpha = 0.05 level.  
Final Selected Model: 2 Joinpoints.

Obesity (E65-E68) / NH whites: 1 Joinpoint

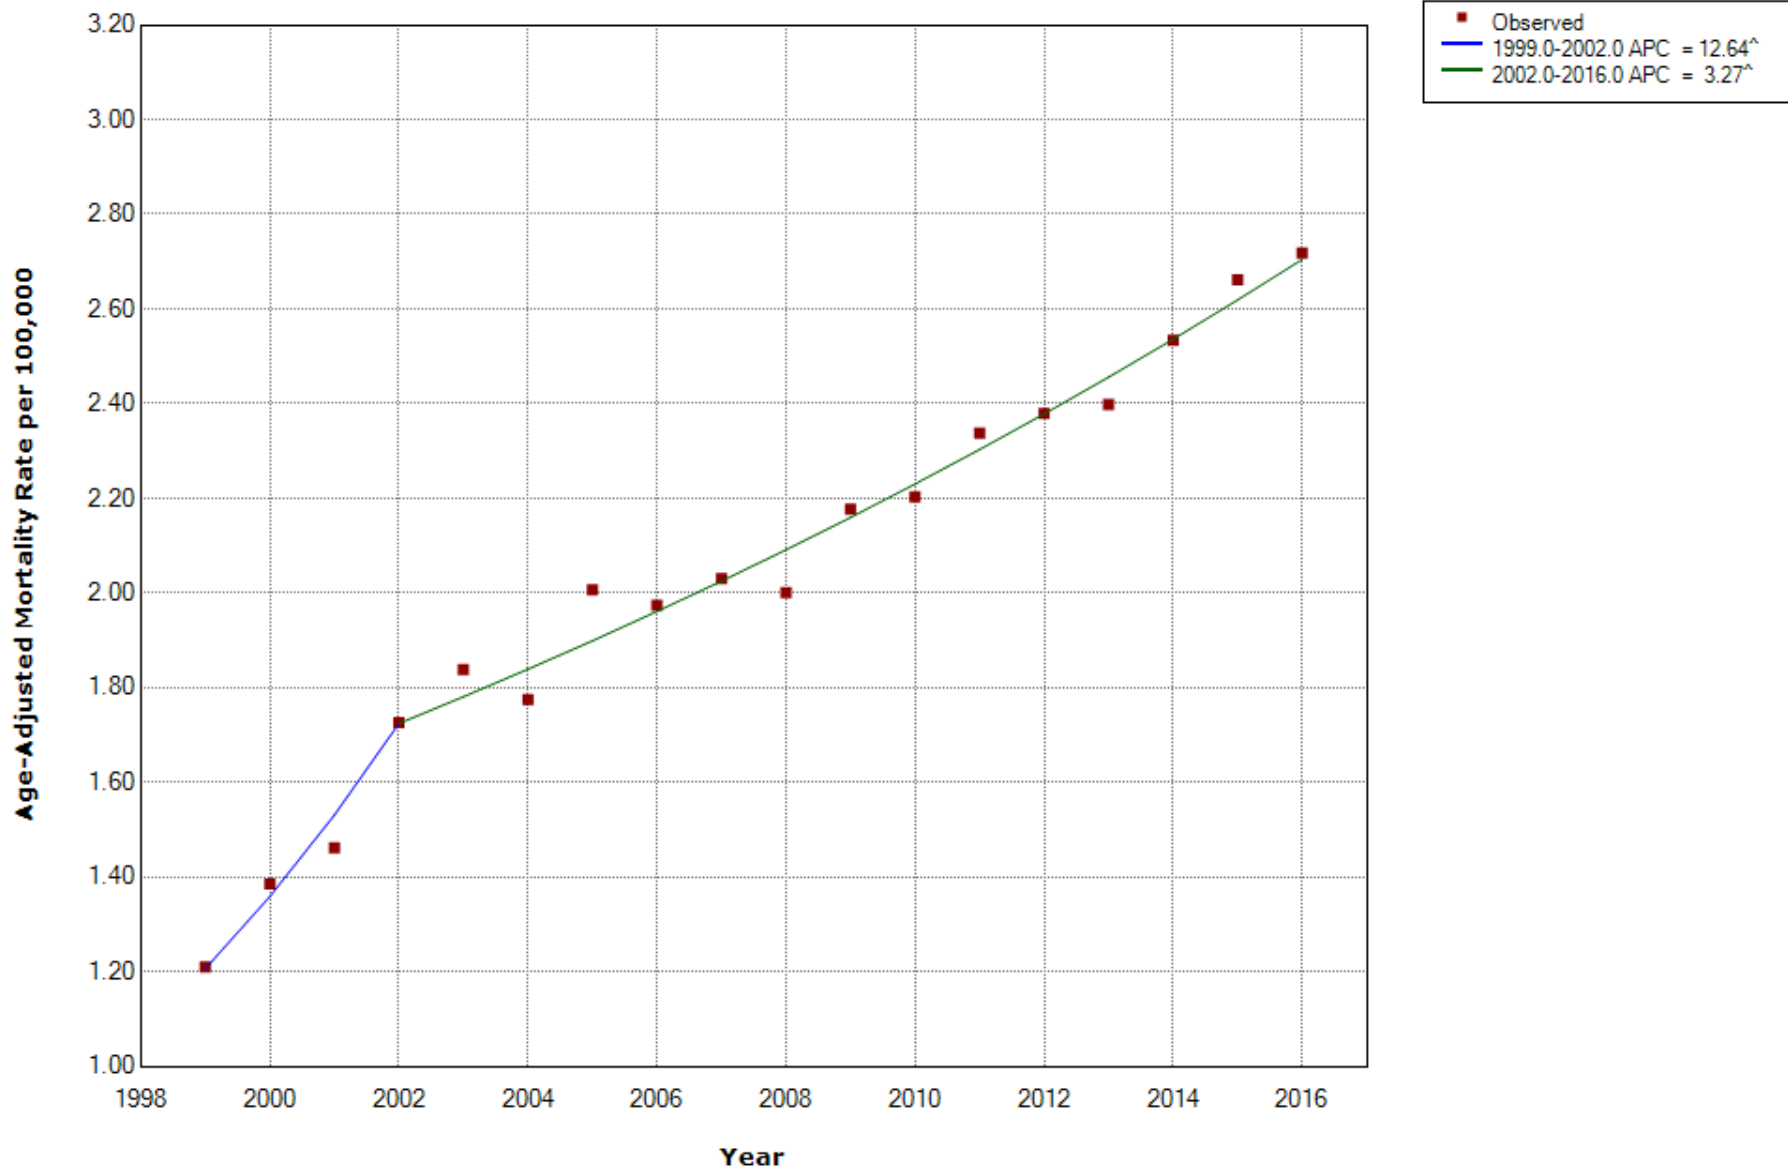

^ Indicates that the Annual Percent Change (APC) is significantly different from zero at the alpha = 0.05 level.  
Final Selected Model: 1 Joinpoint.



### Obesity (E65-E68) / Hispanics: 0 Joinpoints

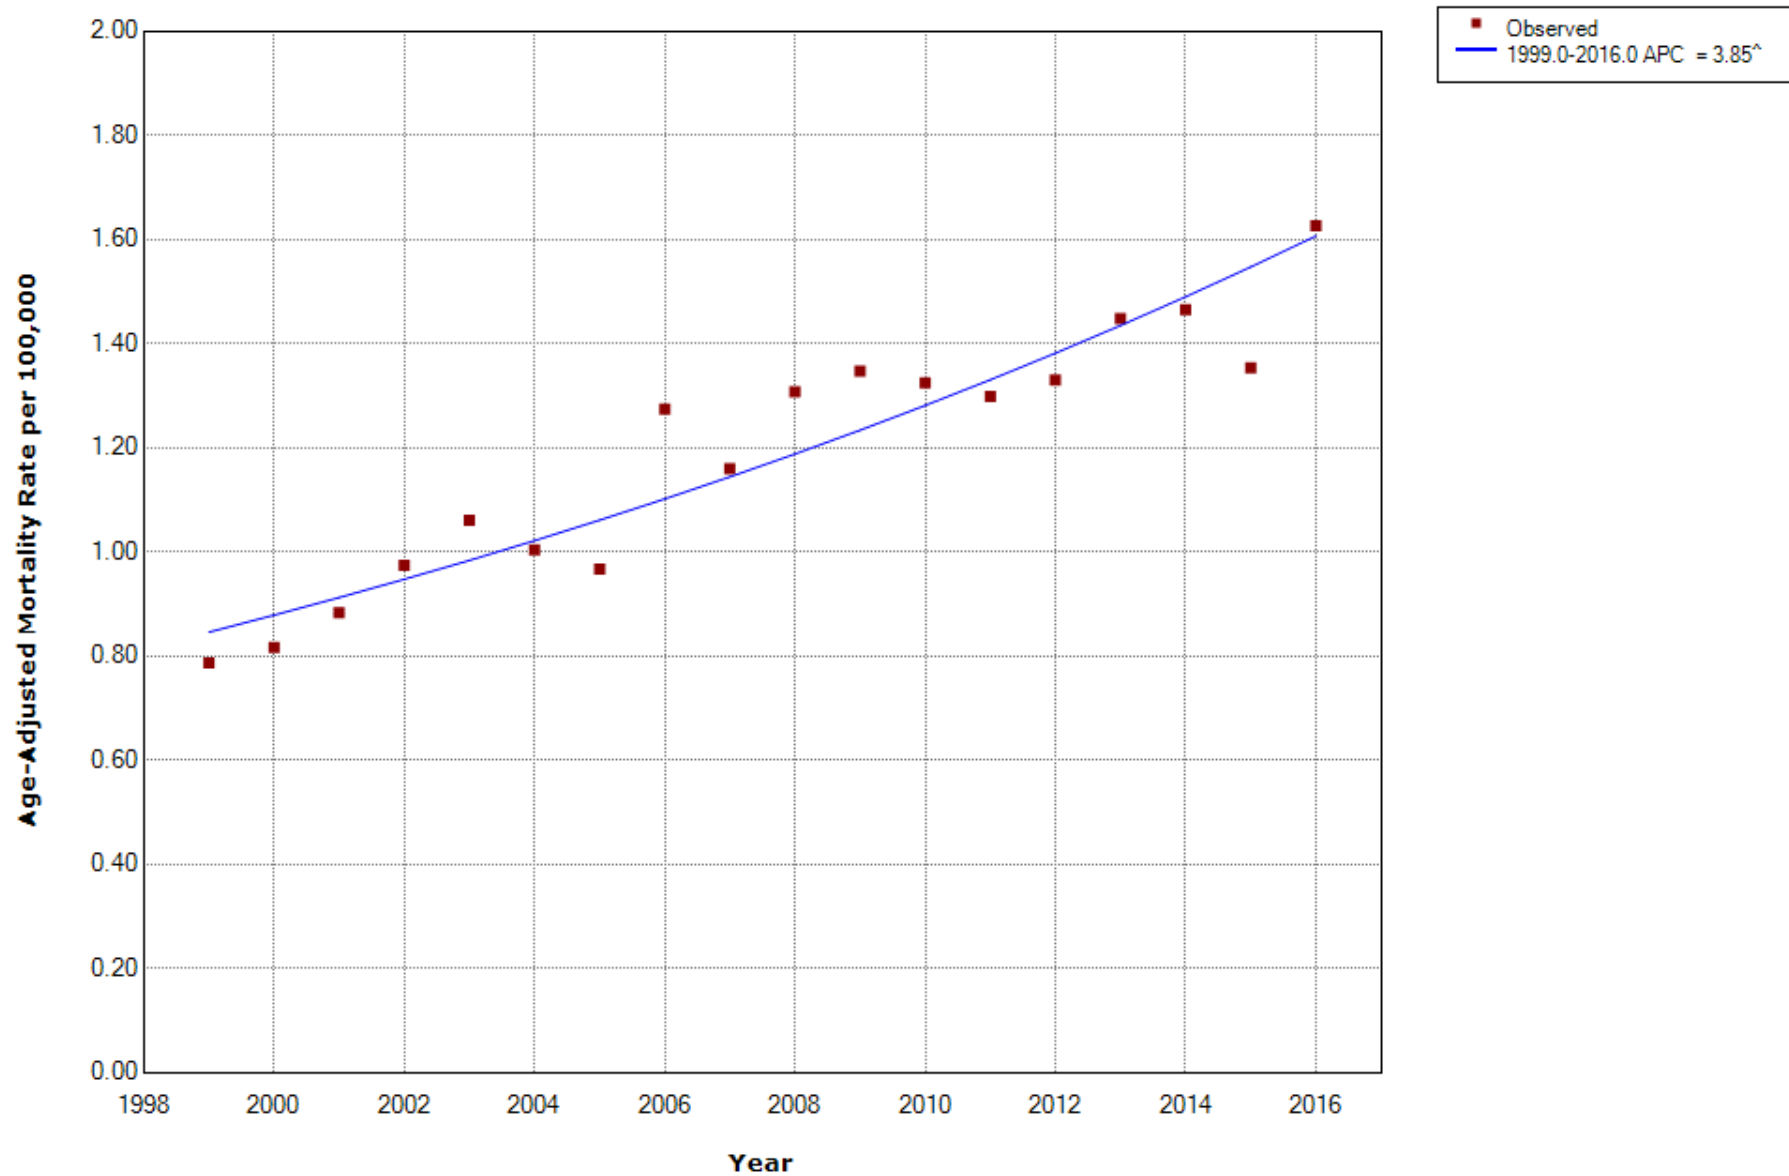

^ Indicates that the Annual Percent Change (APC) is significantly different from zero at the alpha = 0.05 level.  
Final Selected Model: 0 Joinpoints.

### Metabolic disorders (E70-E88) / NH AIAN: Observed

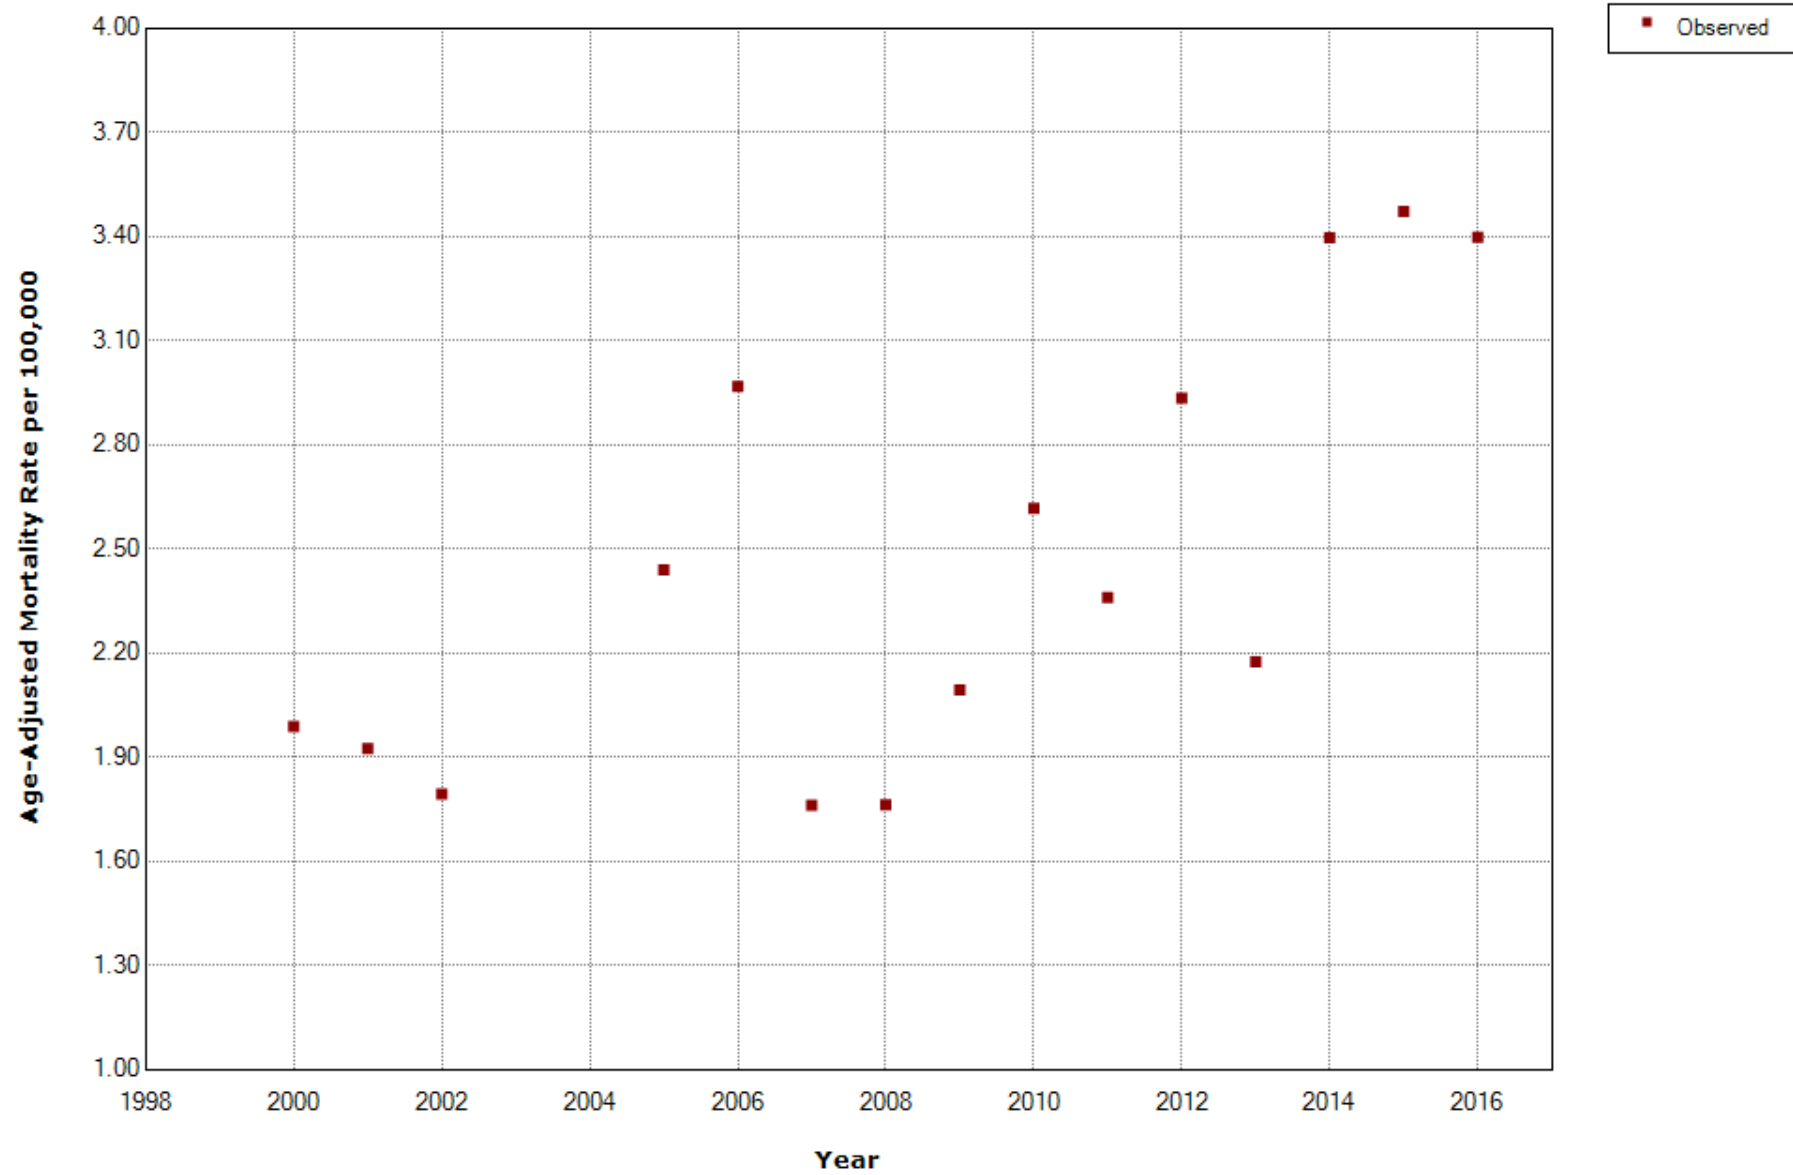

^ Indicates that the Annual Percent Change (APC) is significantly different from zero at the alpha = 0.05 level.

\* Joinpoint cannot process records with missing dependent variable values. Joinpoint will not analyze by-groups that have this error. (Row = 1620, Col = 1)

### Metabolic disorders (E70-E88) / NH API: 0 Joinpoints

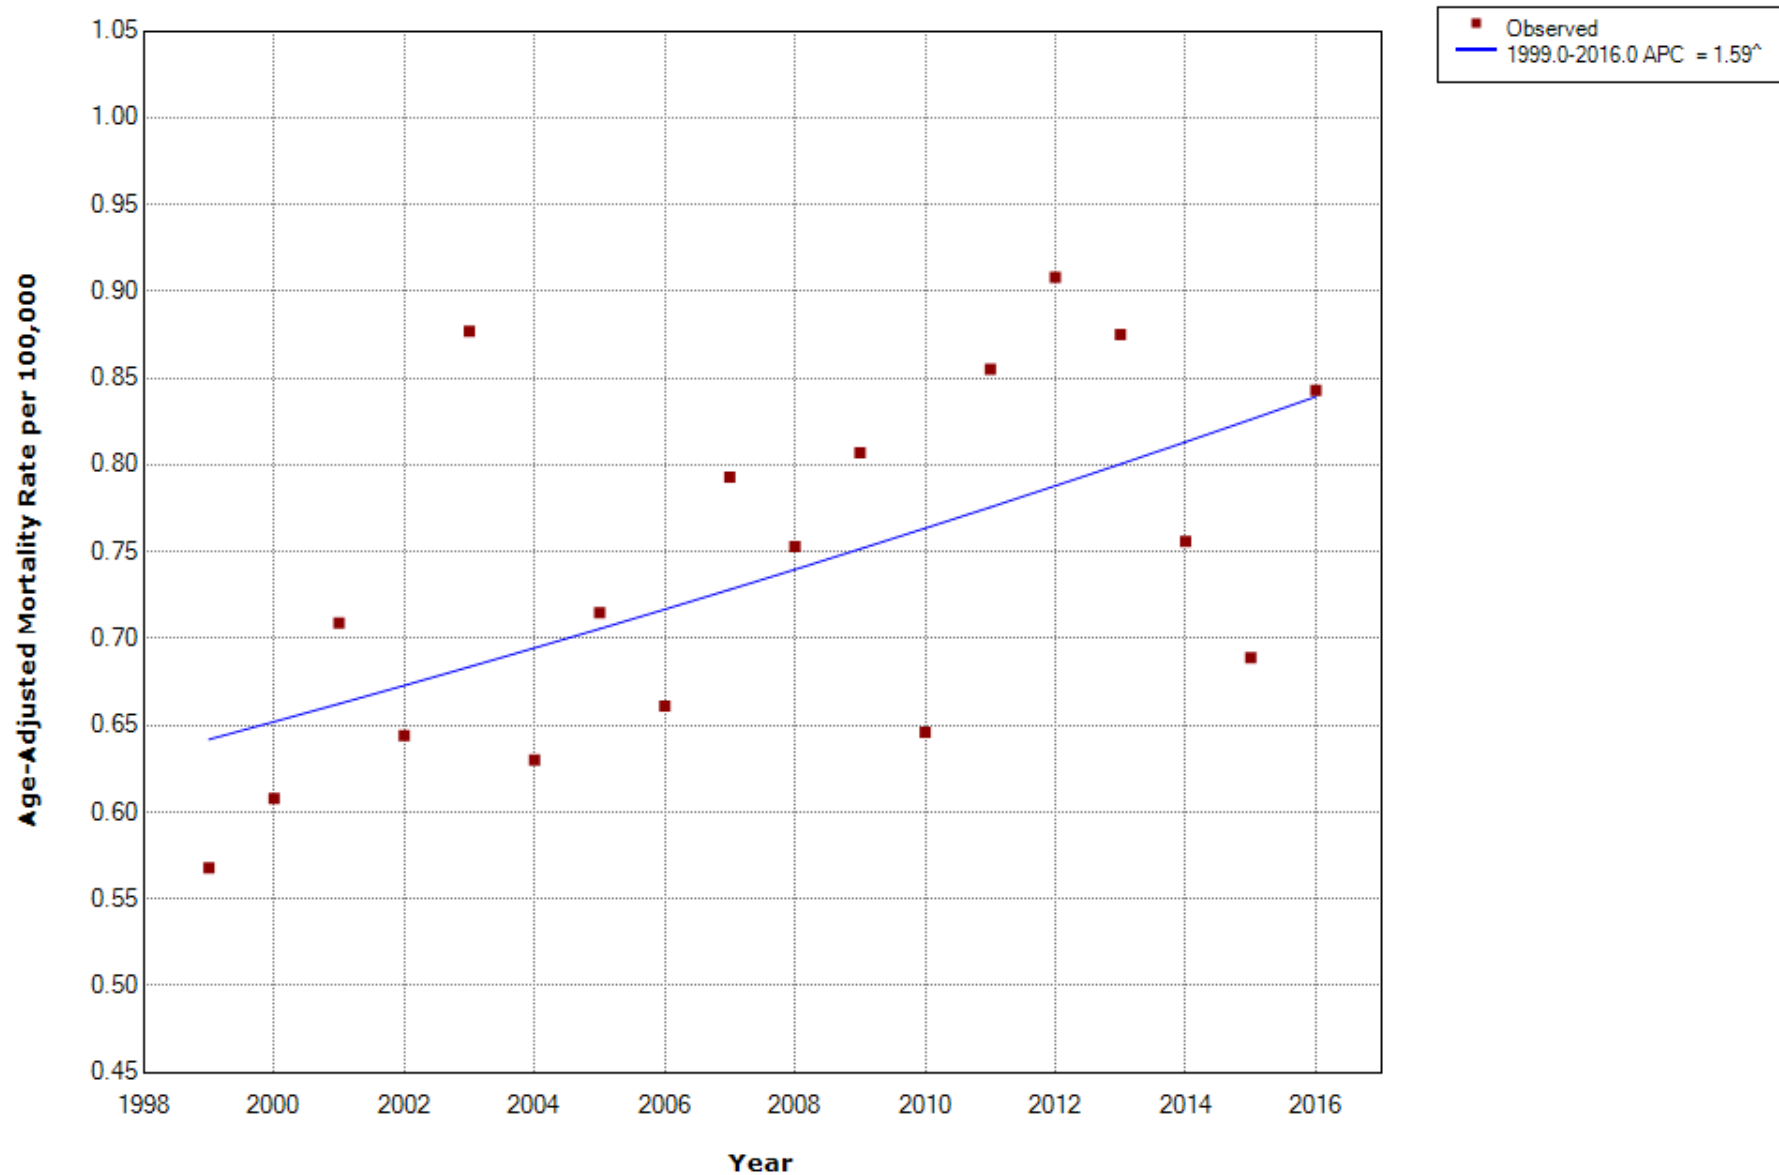

^ Indicates that the Annual Percent Change (APC) is significantly different from zero at the alpha = 0.05 level.  
Final Selected Model: 0 Joinpoints.

### Metabolic disorders (E70-E88) / NH Blacks: 1 Joinpoint

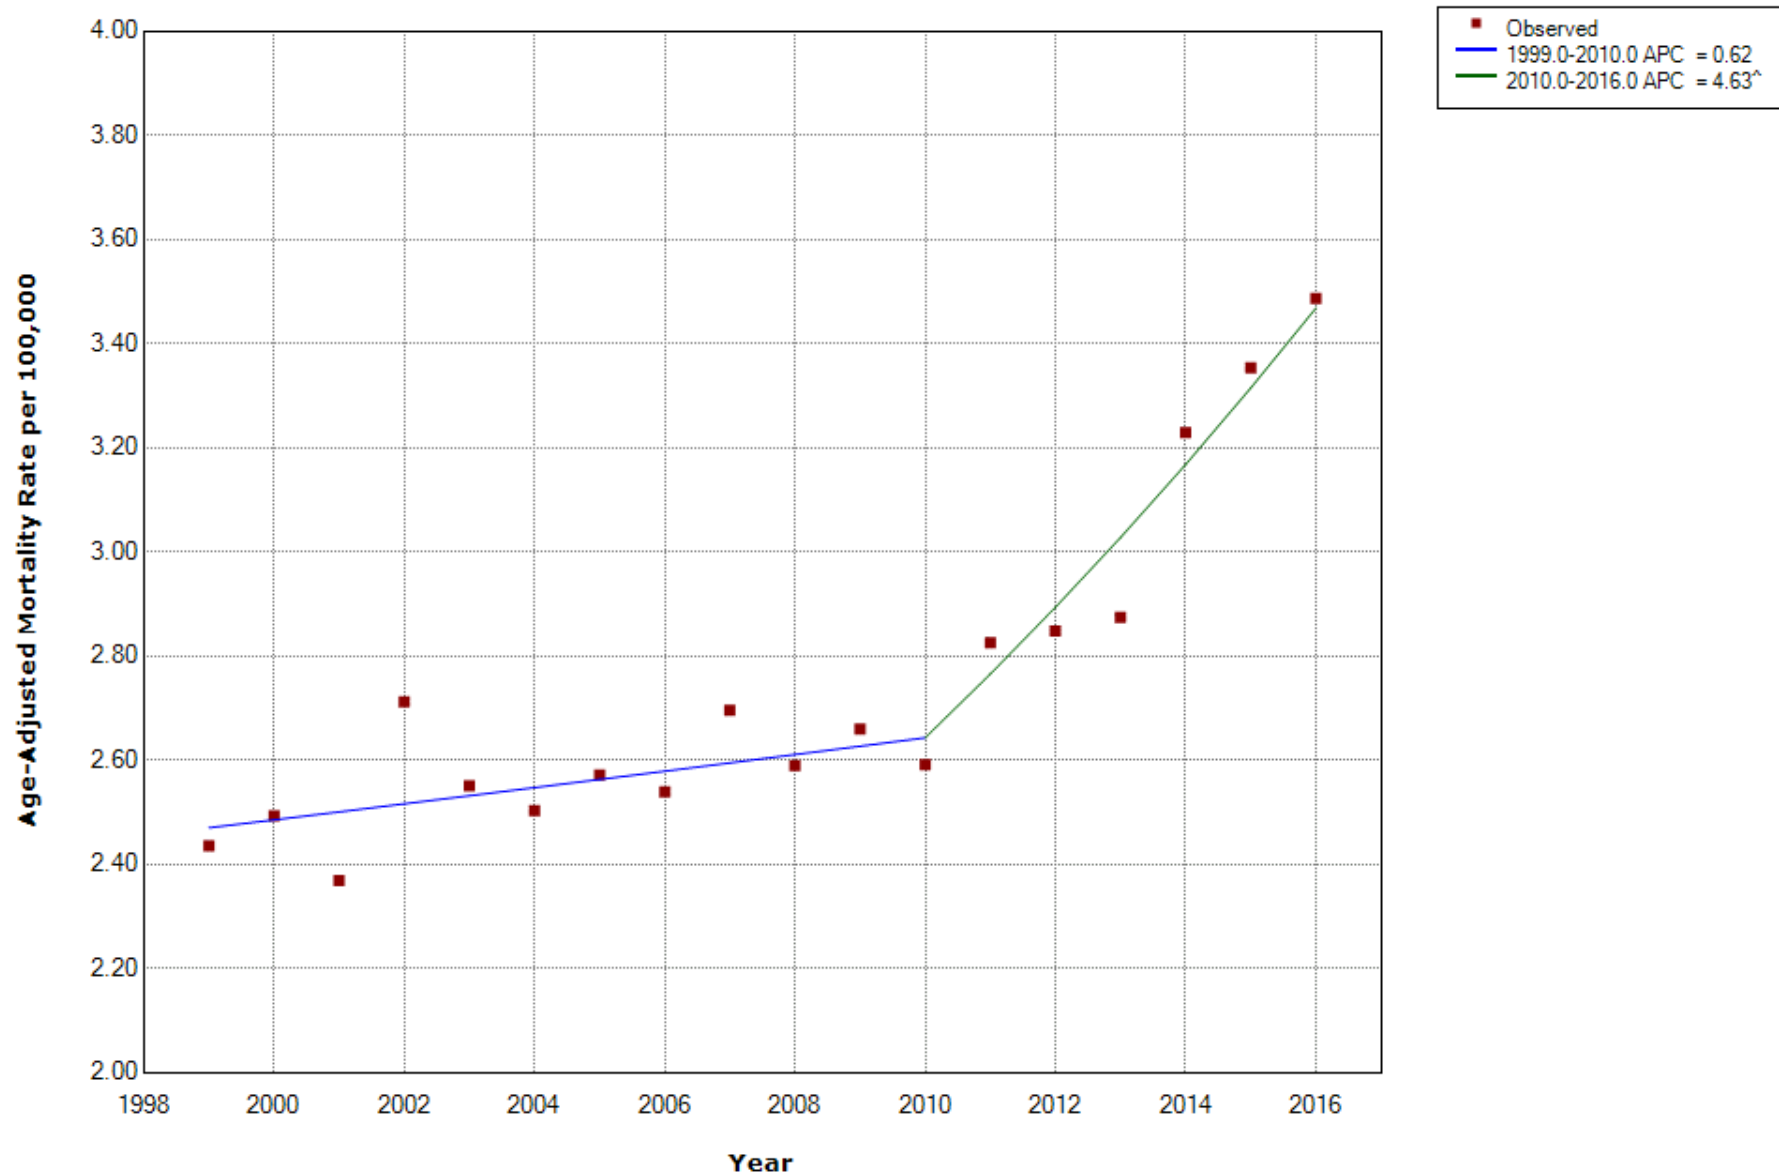

^ Indicates that the Annual Percent Change (APC) is significantly different from zero at the alpha = 0.05 level.  
Final Selected Model: 1 Joinpoint.

Metabolic disorders (E70-E88) / NH whites: 0 Joinpoints

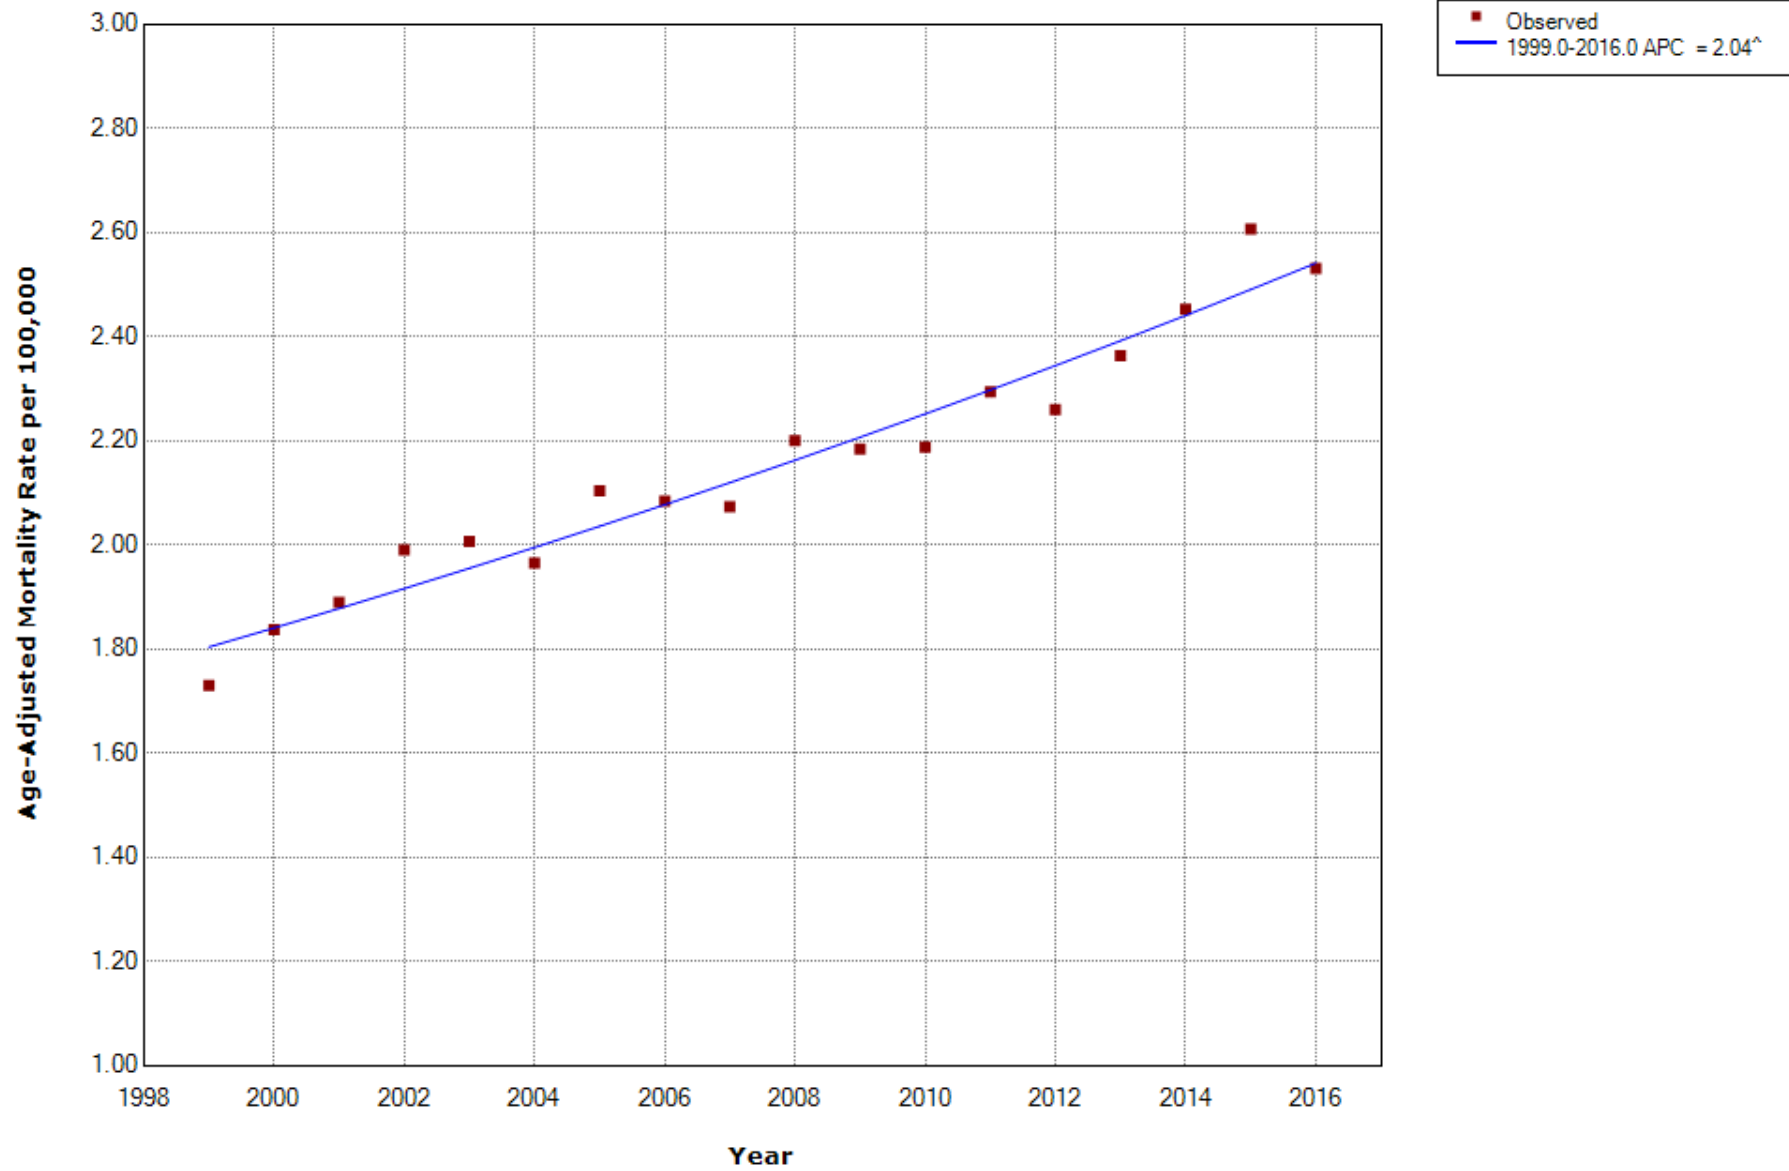

^ Indicates that the Annual Percent Change (APC) is significantly different from zero at the alpha = 0.05 level.  
Final Selected Model: 0 Joinpoints.

Metabolic disorders (E70-E88) / Hispanics: 0 Joinpoints

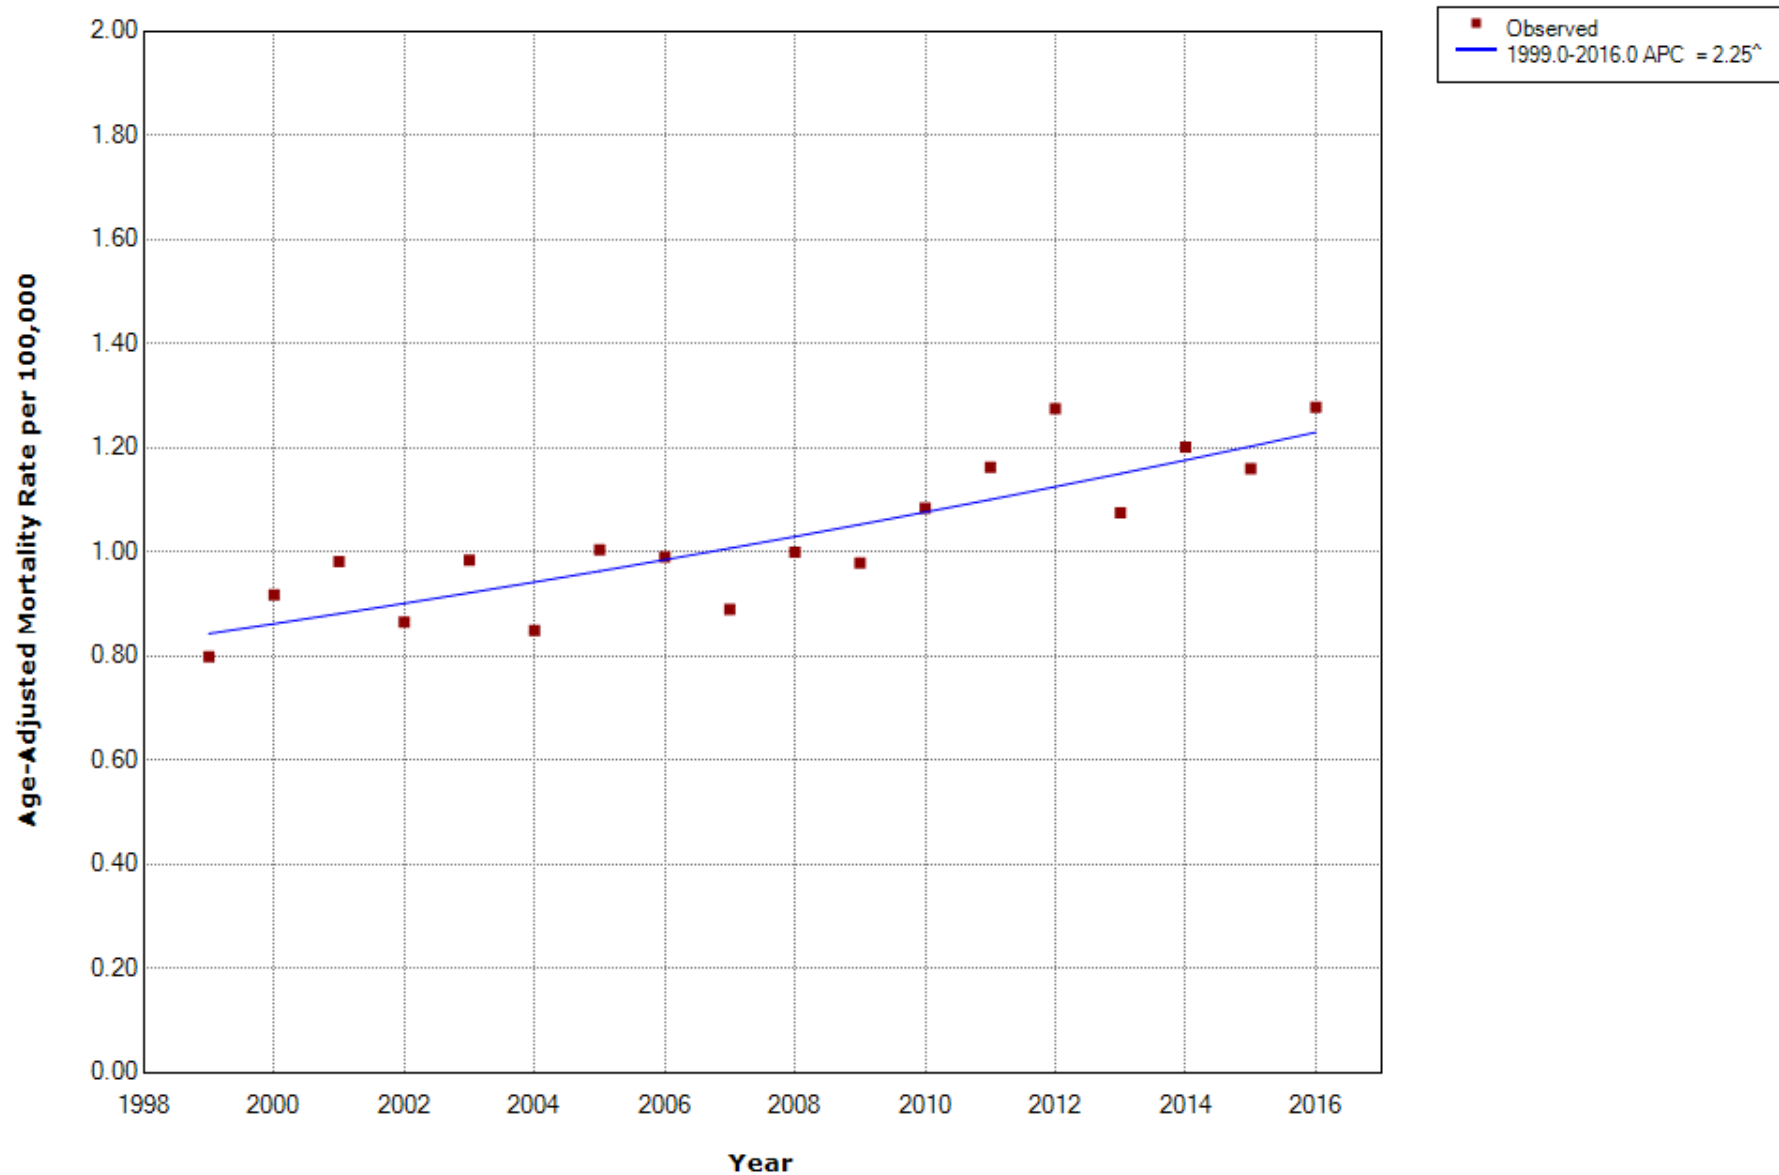

^ Indicates that the Annual Percent Change (APC) is significantly different from zero at the alpha = 0.05 level.  
Final Selected Model: 0 Joinpoints.

Intestinal, tuberculosis, zoonotic and other bacterial, sexually transmitted, spirochaetal, chlamydial, rickettsioses, central nervous system, arthropod-borne, viral hemorrhagic (A00-A99) / NH AIAN: 0 Joinpoints

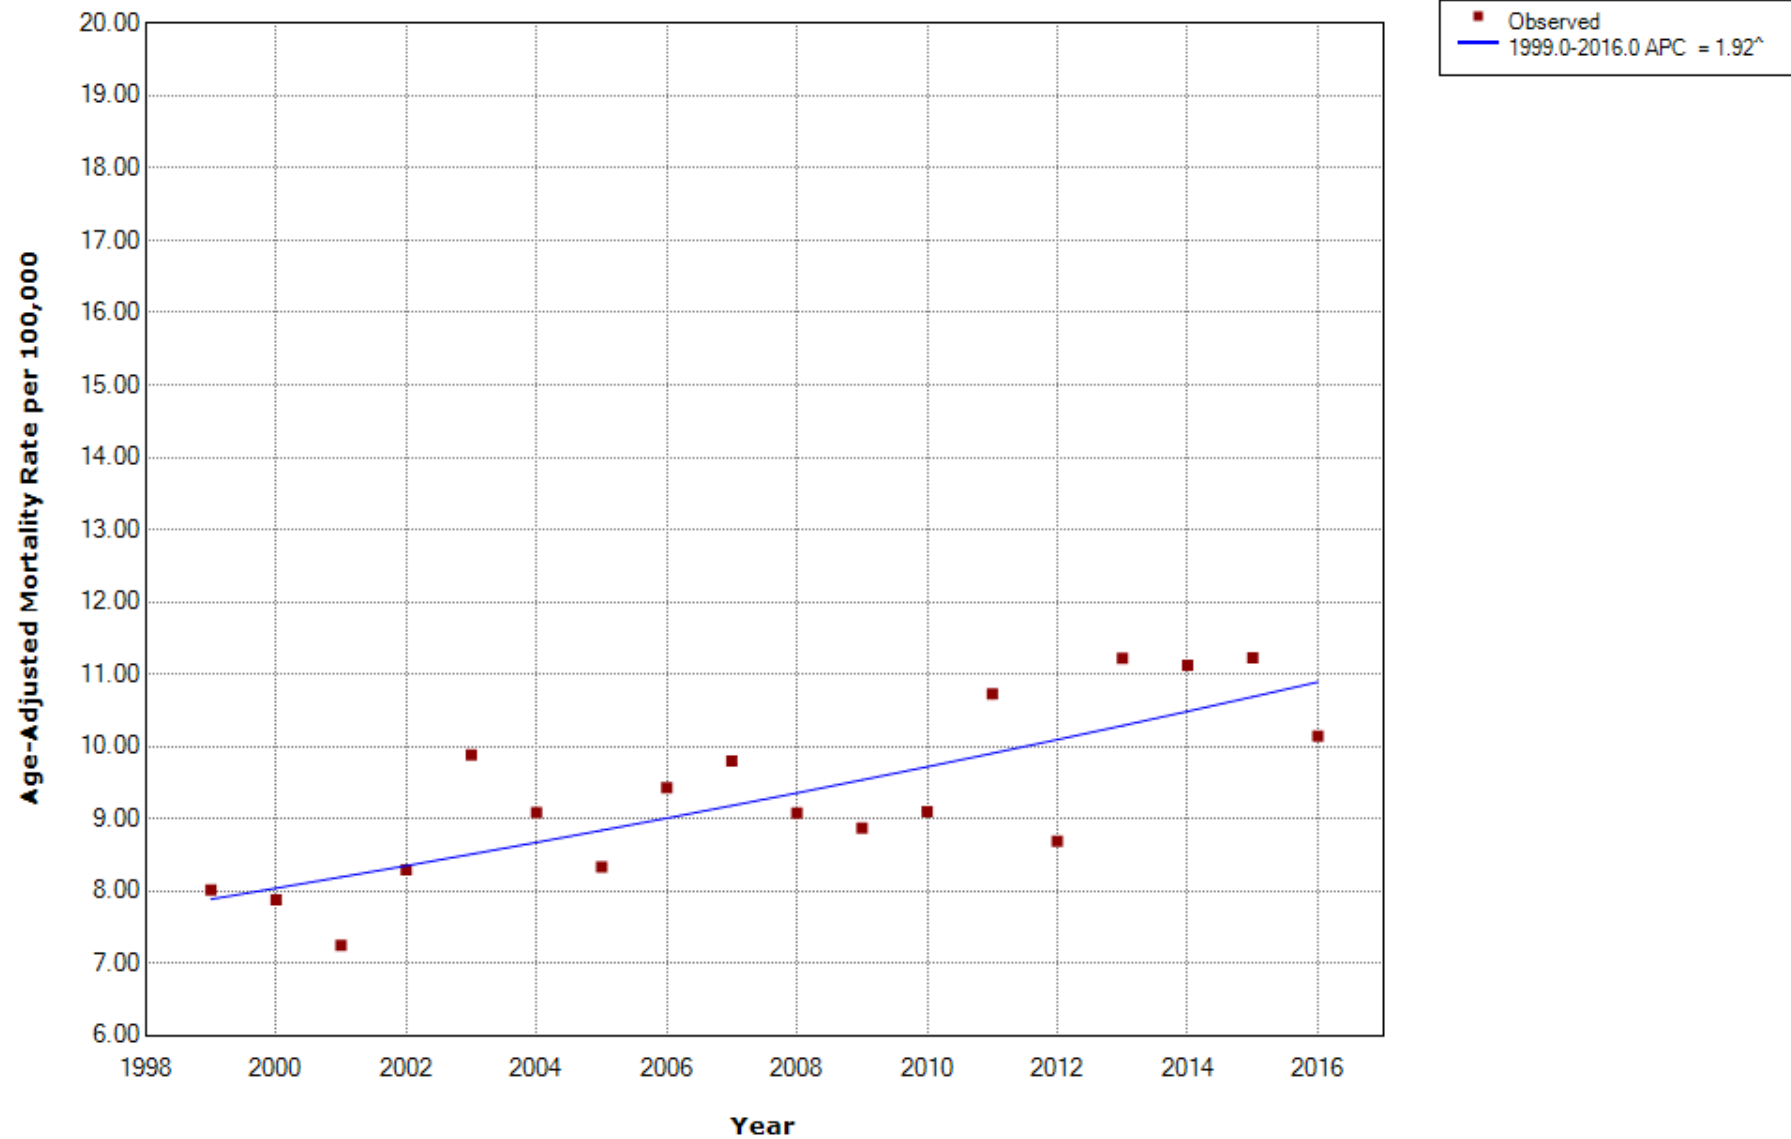

^ Indicates that the Annual Percent Change (APC) is significantly different from zero at the alpha = 0.05 level.  
Final Selected Model: 0 Joinpoints.

Intestinal, tuberculosis, zoonotic and other bacterial, sexually transmitted, spirochaetal, chlamydial, rickettsioses, central nervous system, arthropod-borne, viral hemorrhagic (A00-A99) / NH API: 0 Joinpoints

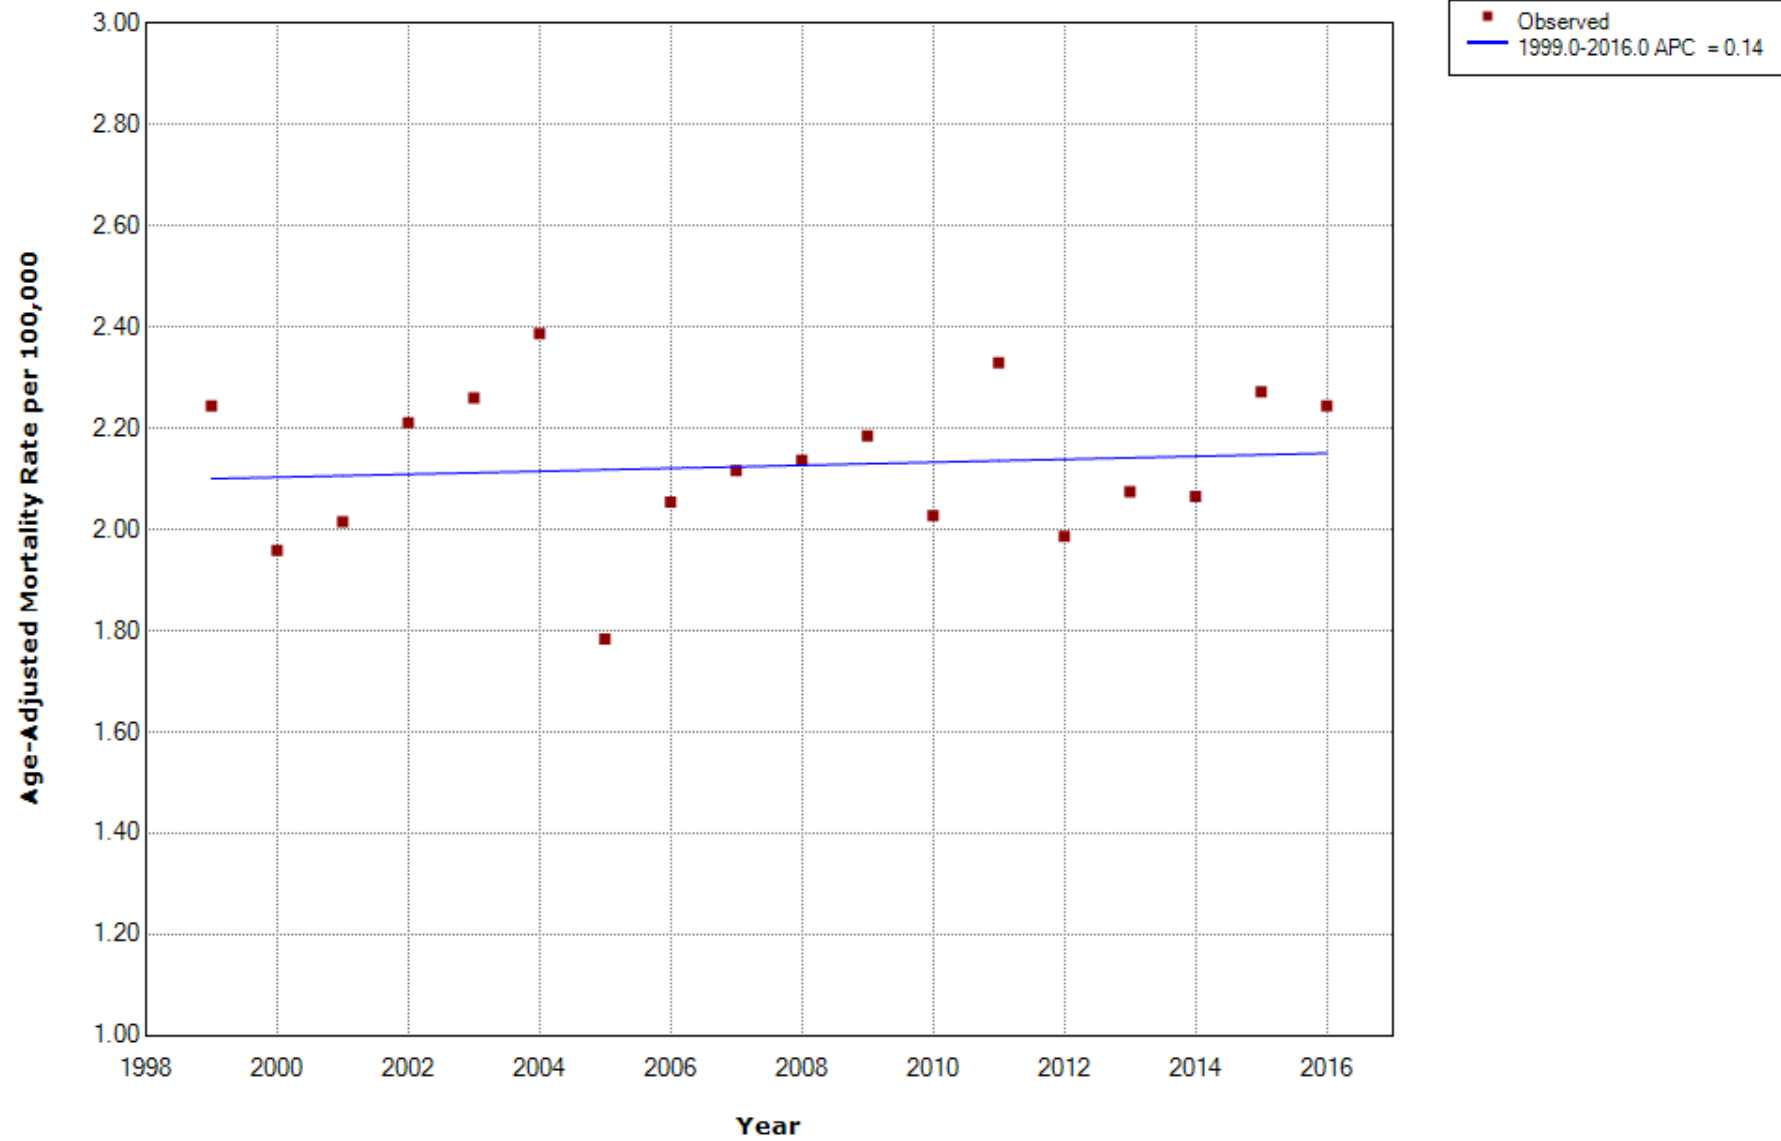

^ Indicates that the Annual Percent Change (APC) is significantly different from zero at the alpha = 0.05 level.  
Final Selected Model: 0 Joinpoints.



Intestinal, tuberculosis, zoonotic and other bacterial, sexually transmitted, spirochaetal, chlamydial, rickettsioses, central nervous system, arthropod-borne, viral hemorrhagic (A00-A99) / NH Blacks: 2 Joinpoints

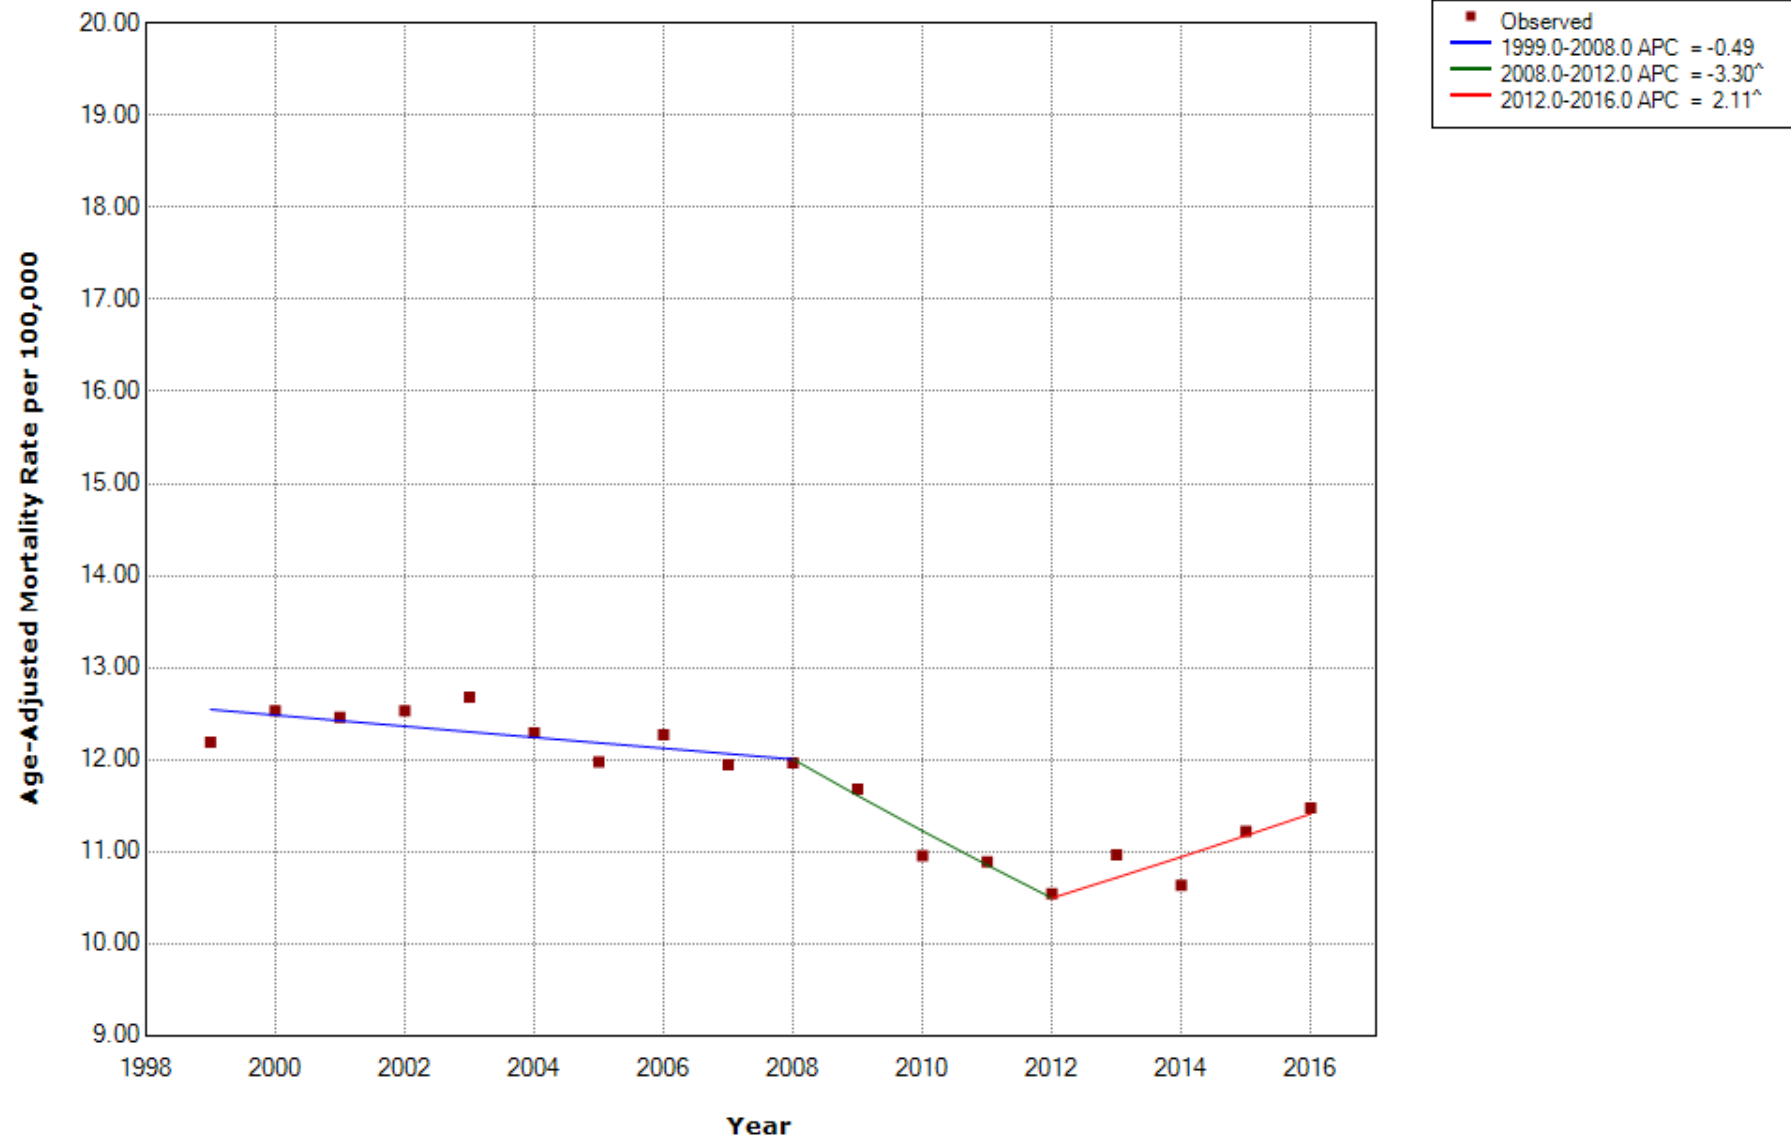

^ Indicates that the Annual Percent Change (APC) is significantly different from zero at the alpha = 0.05 level.  
Final Selected Model: 2 Joinpoints.

Intestinal, tuberculosis, zoonotic and other bacterial, sexually transmitted, spirochaetal, chlamydial, rickettsioses, central nervous system, arthropod-borne, viral hemorrhagic (A00-A99) / NH whites: 0 Joinpoints

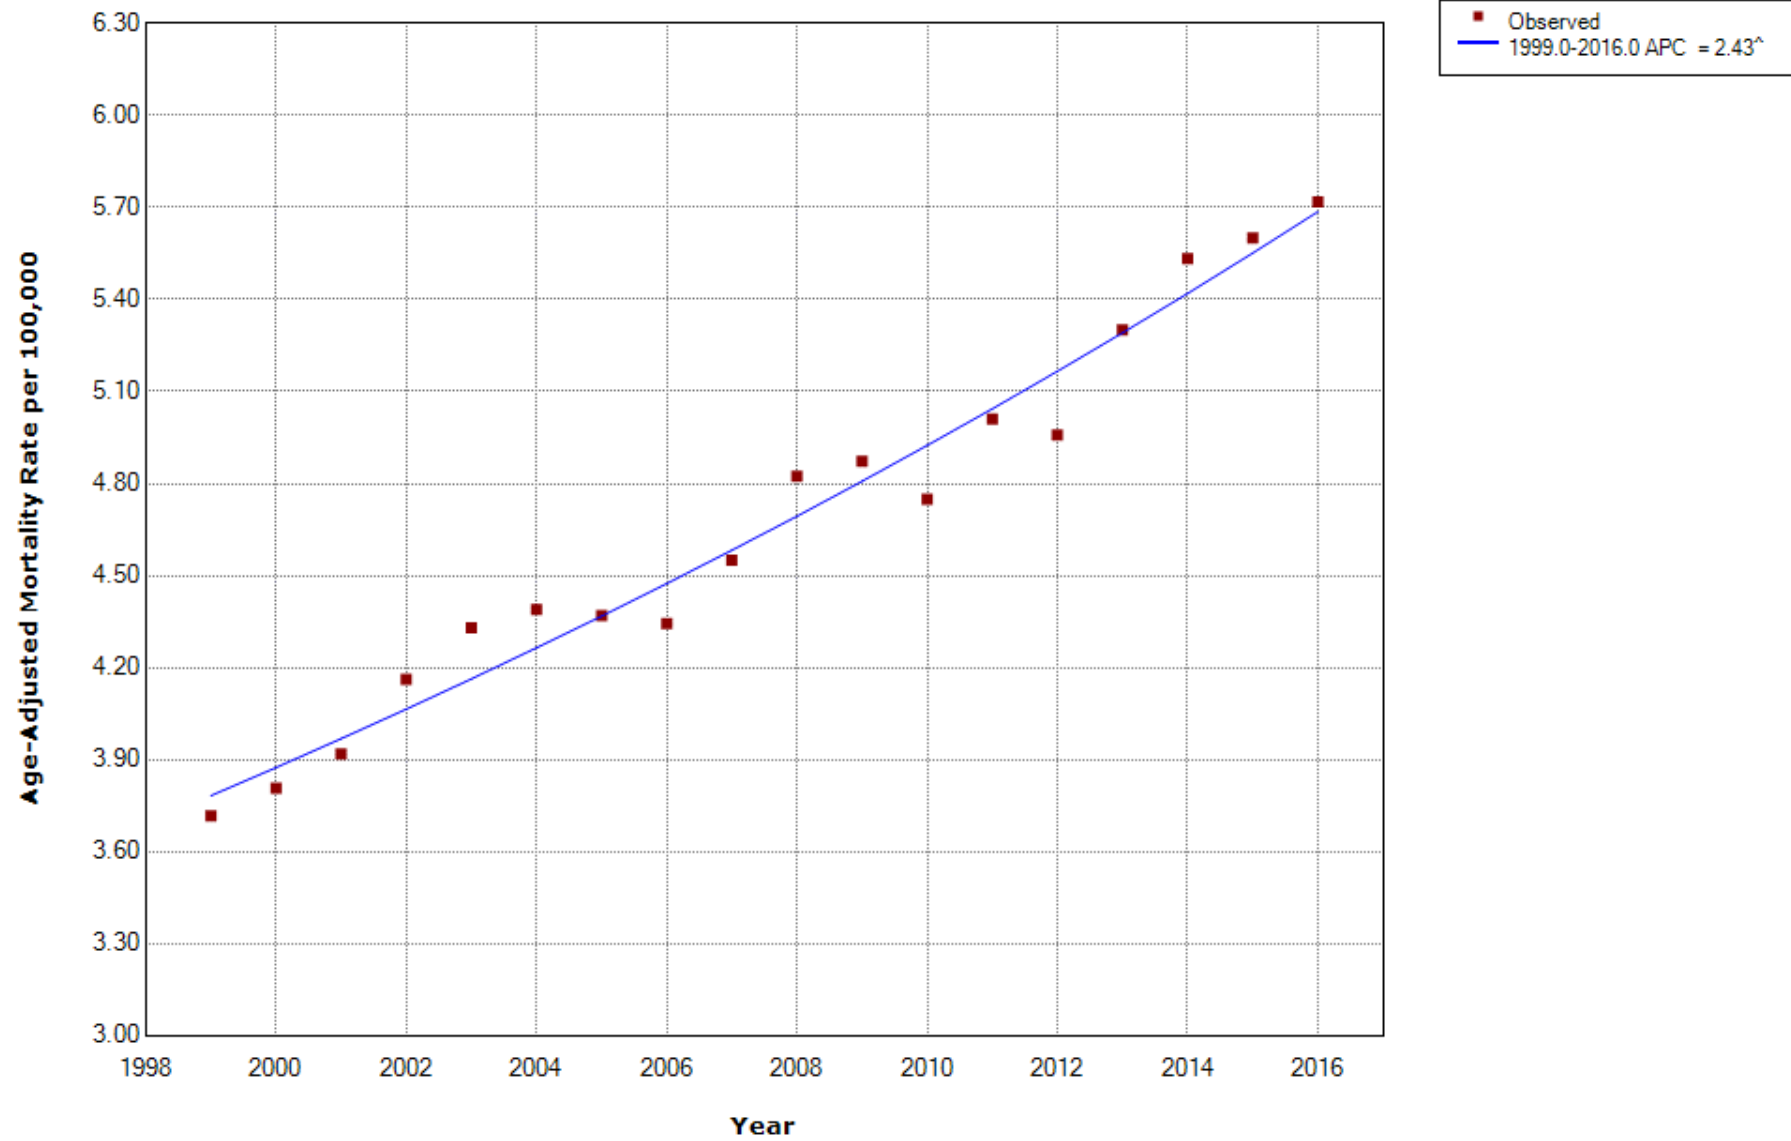

^ Indicates that the Annual Percent Change (APC) is significantly different from zero at the alpha = 0.05 level.  
Final Selected Model: 0 Joinpoints.

Intestinal, tuberculosis, zoonotic and other bacterial, sexually transmitted, spirochaetal, chlamydial, rickettsioses, central nervous system, arthropod-borne, viral hemorrhagic (A00-A99) / Hispanics: 0 Joinpoints

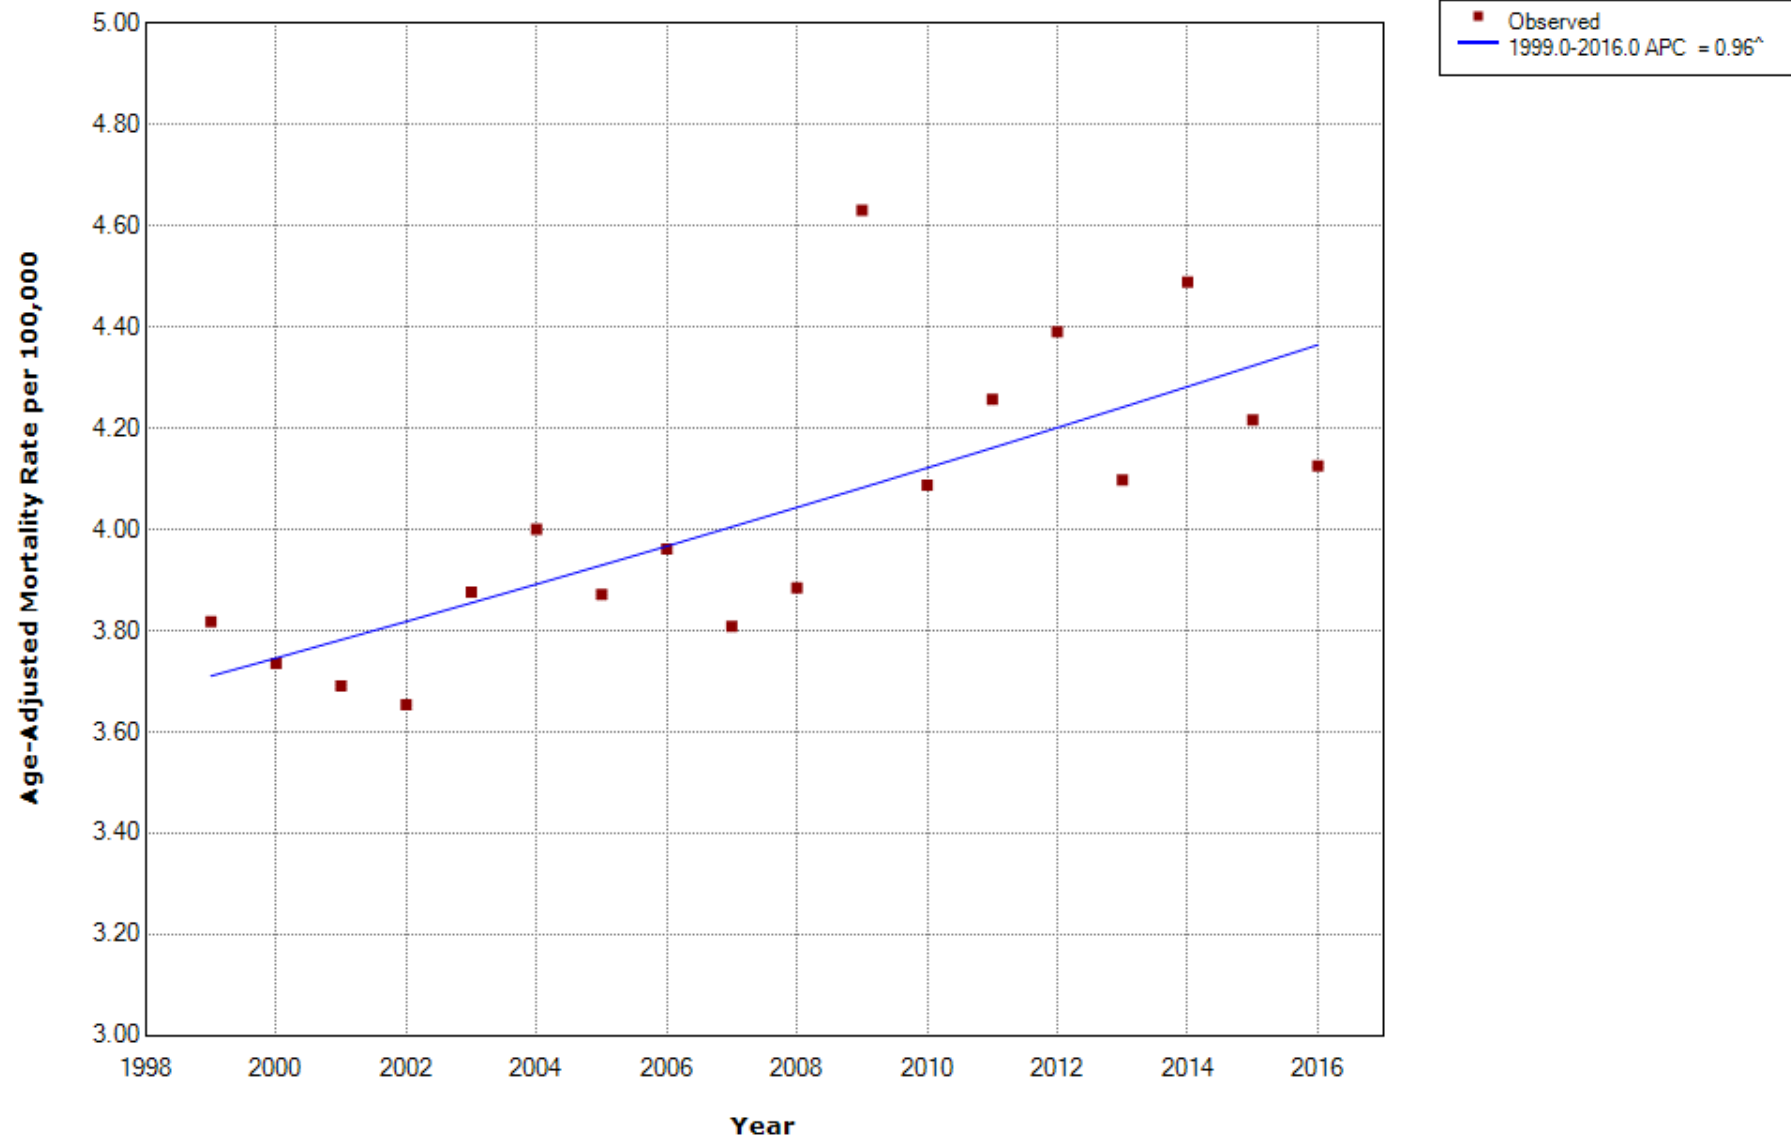

^ Indicates that the Annual Percent Change (APC) is significantly different from zero at the alpha = 0.05 level.  
Final Selected Model: 0 Joinpoints.

### Viral hepatitis (B15-B19) / NH AIAN: 0 Joinpoints

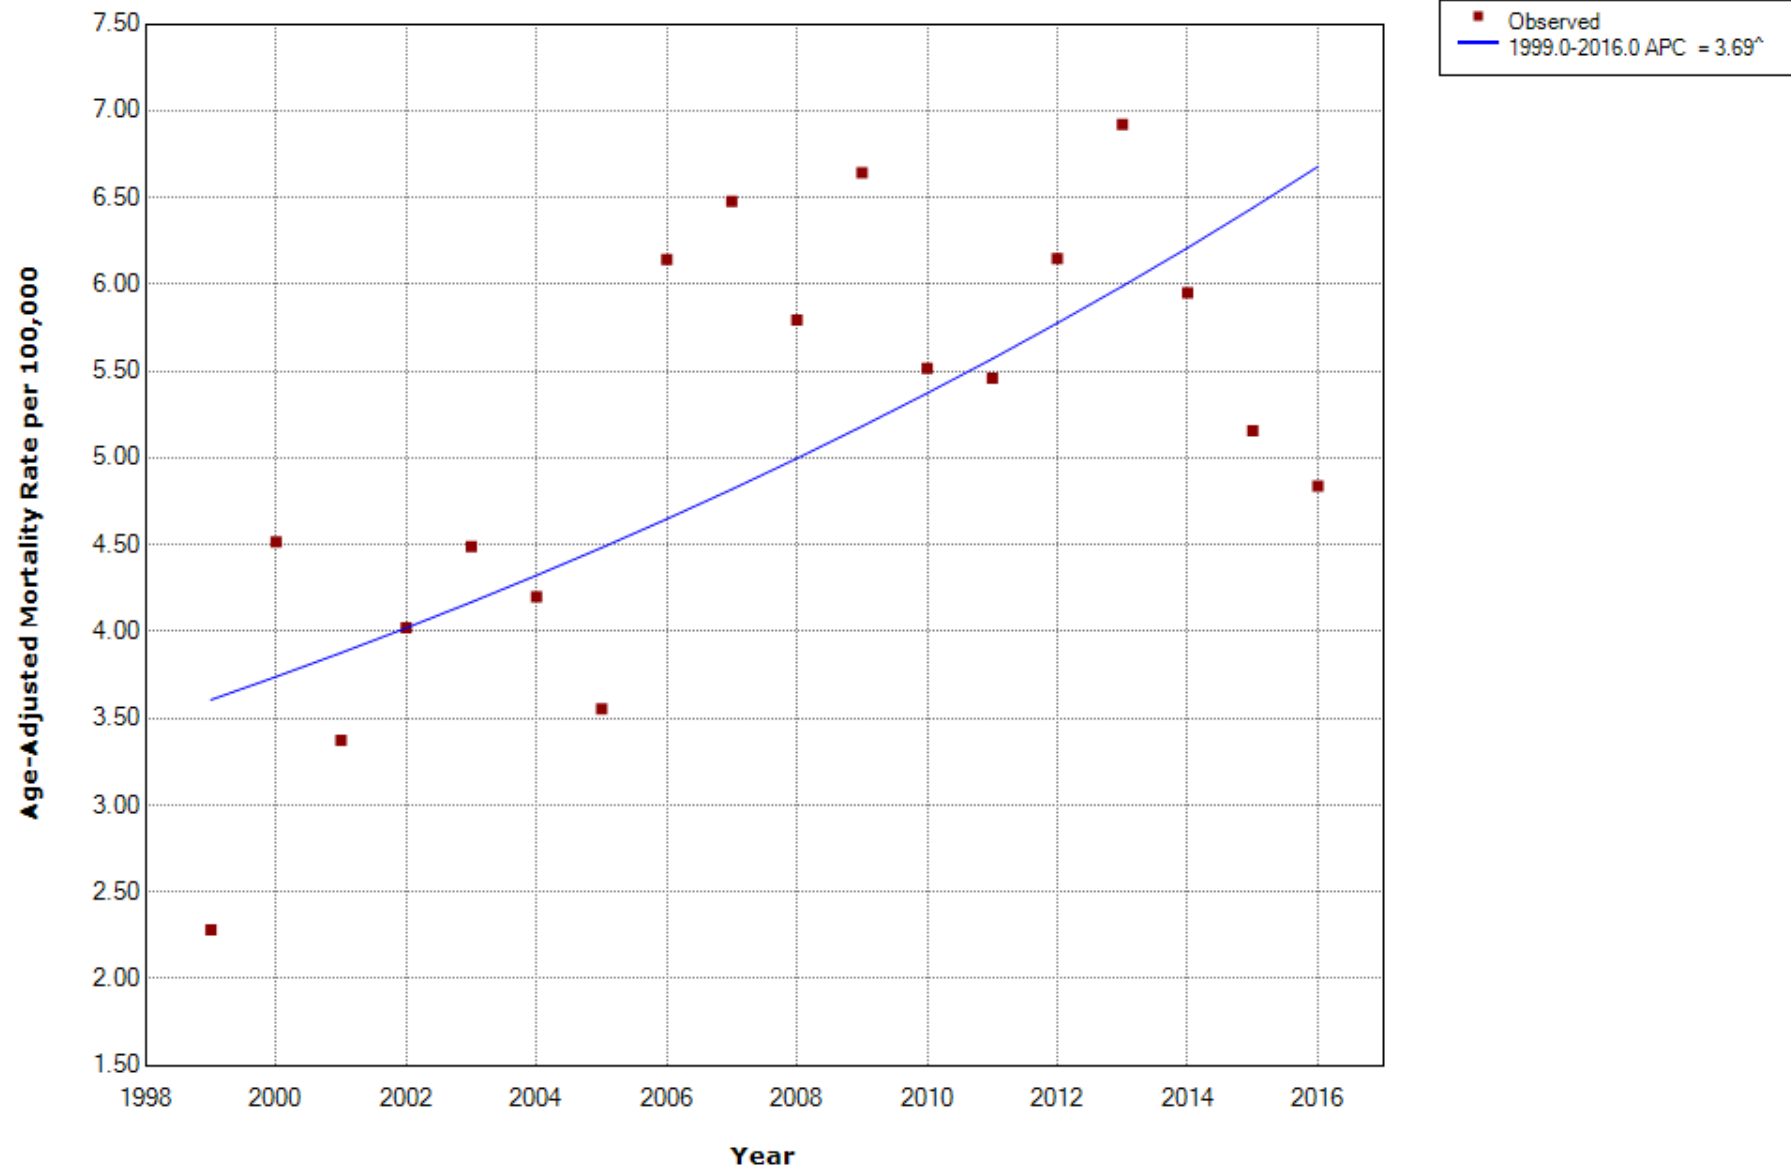

^ Indicates that the Annual Percent Change (APC) is significantly different from zero at the alpha = 0.05 level.  
Final Selected Model: 0 Joinpoints.

### Viral hepatitis (B15-B19) / NH API: 0 Joinpoints

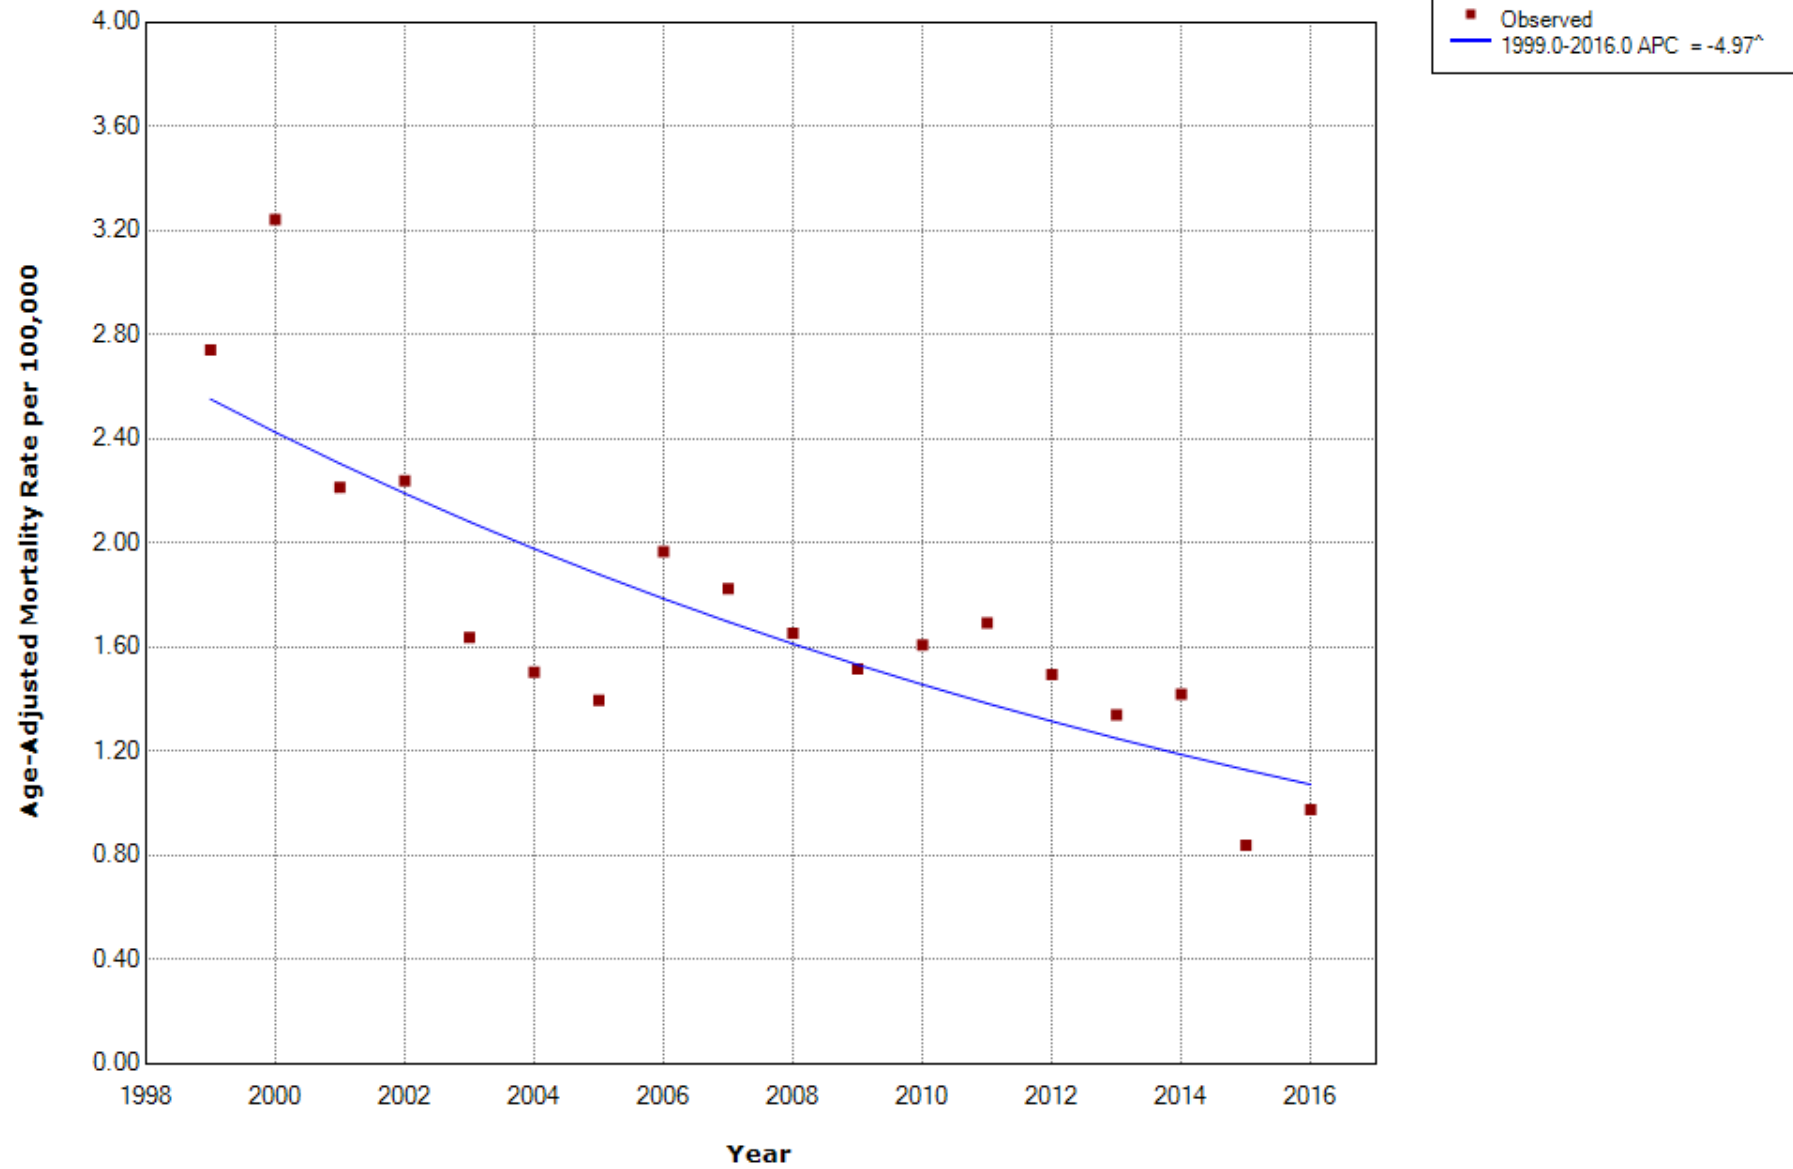

^ Indicates that the Annual Percent Change (APC) is significantly different from zero at the alpha = 0.05 level.  
Final Selected Model: 0 Joinpoints.

### Viral hepatitis (B15-B19) / NH Blacks: 2 Joinpoints

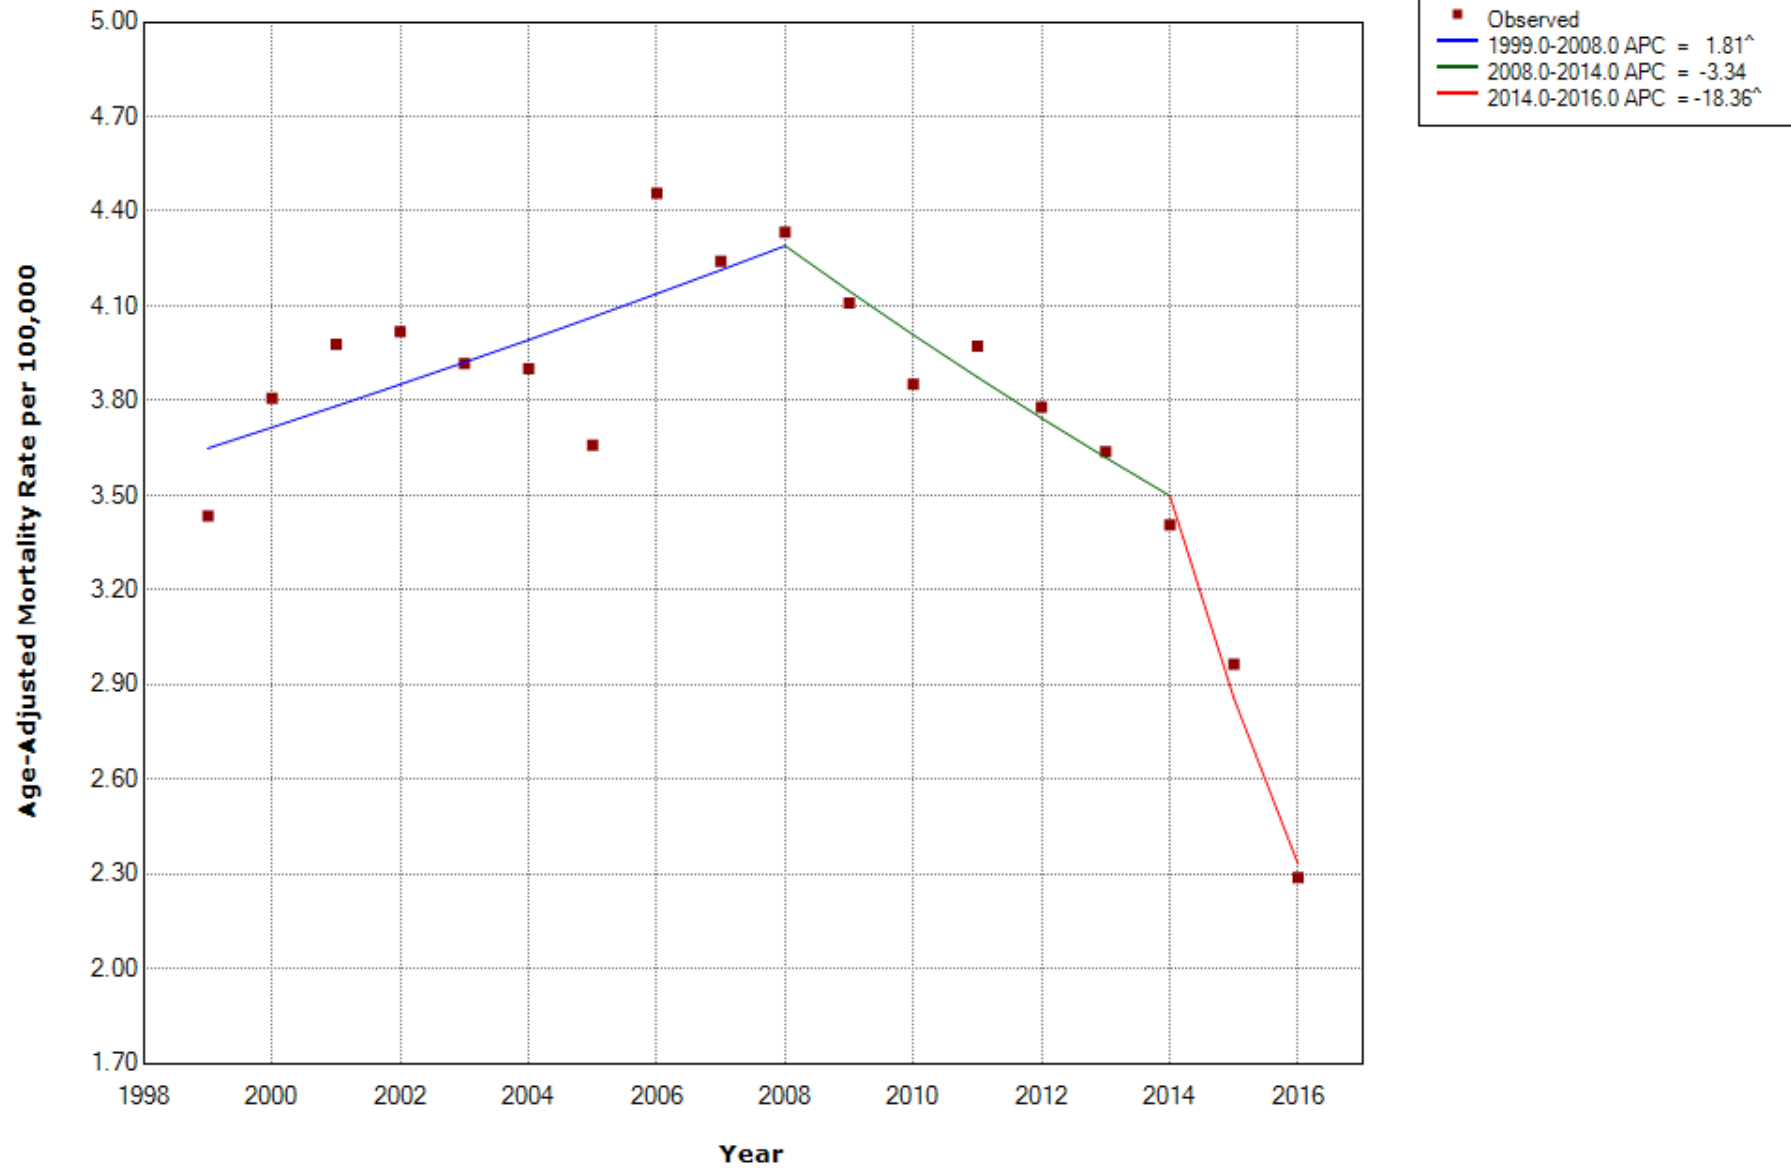

^ Indicates that the Annual Percent Change (APC) is significantly different from zero at the alpha = 0.05 level.  
Final Selected Model: 2 Joinpoints.

### Viral hepatitis (B15-B19) / NH whites: 2 Joinpoints

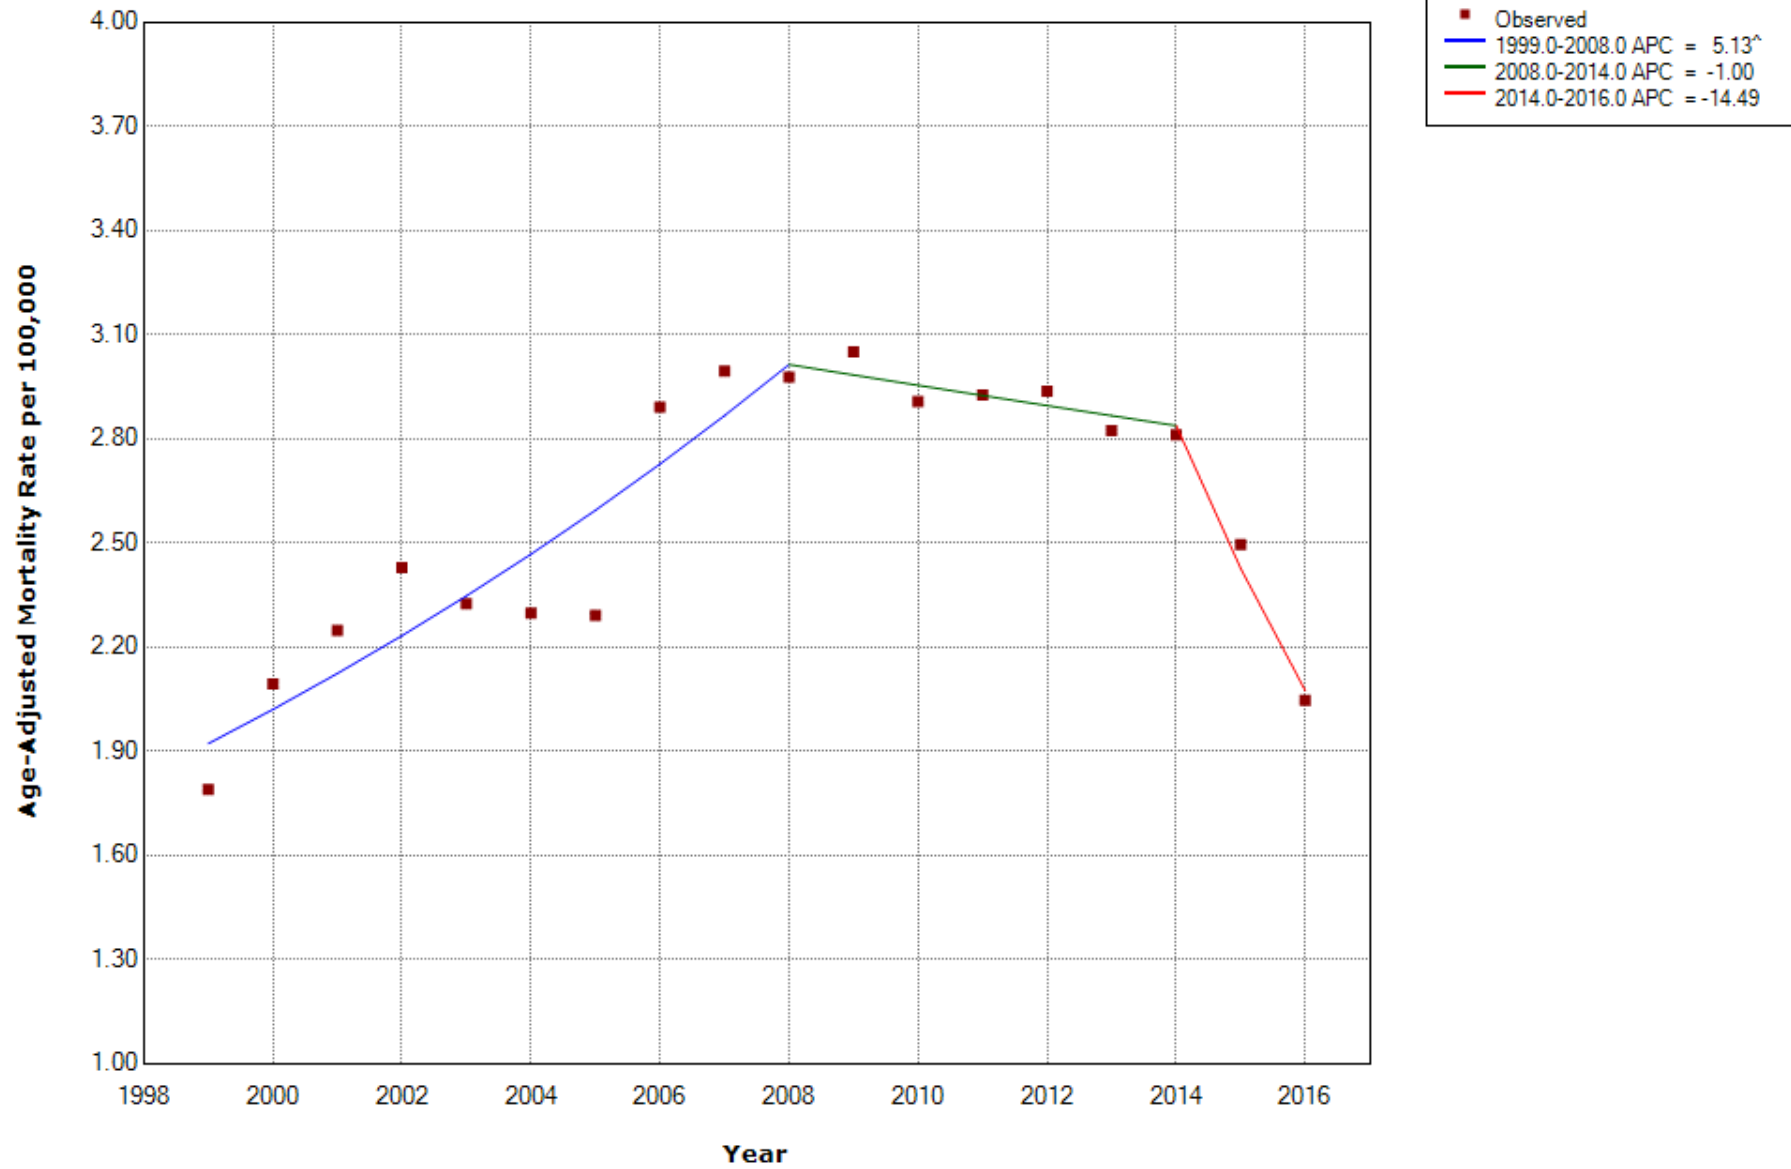

<sup>^</sup> Indicates that the Annual Percent Change (APC) is significantly different from zero at the alpha = 0.05 level.  
Final Selected Model: 2 Joinpoints.

### Viral hepatitis (B15-B19) / Hispanics: 1 Joinpoint

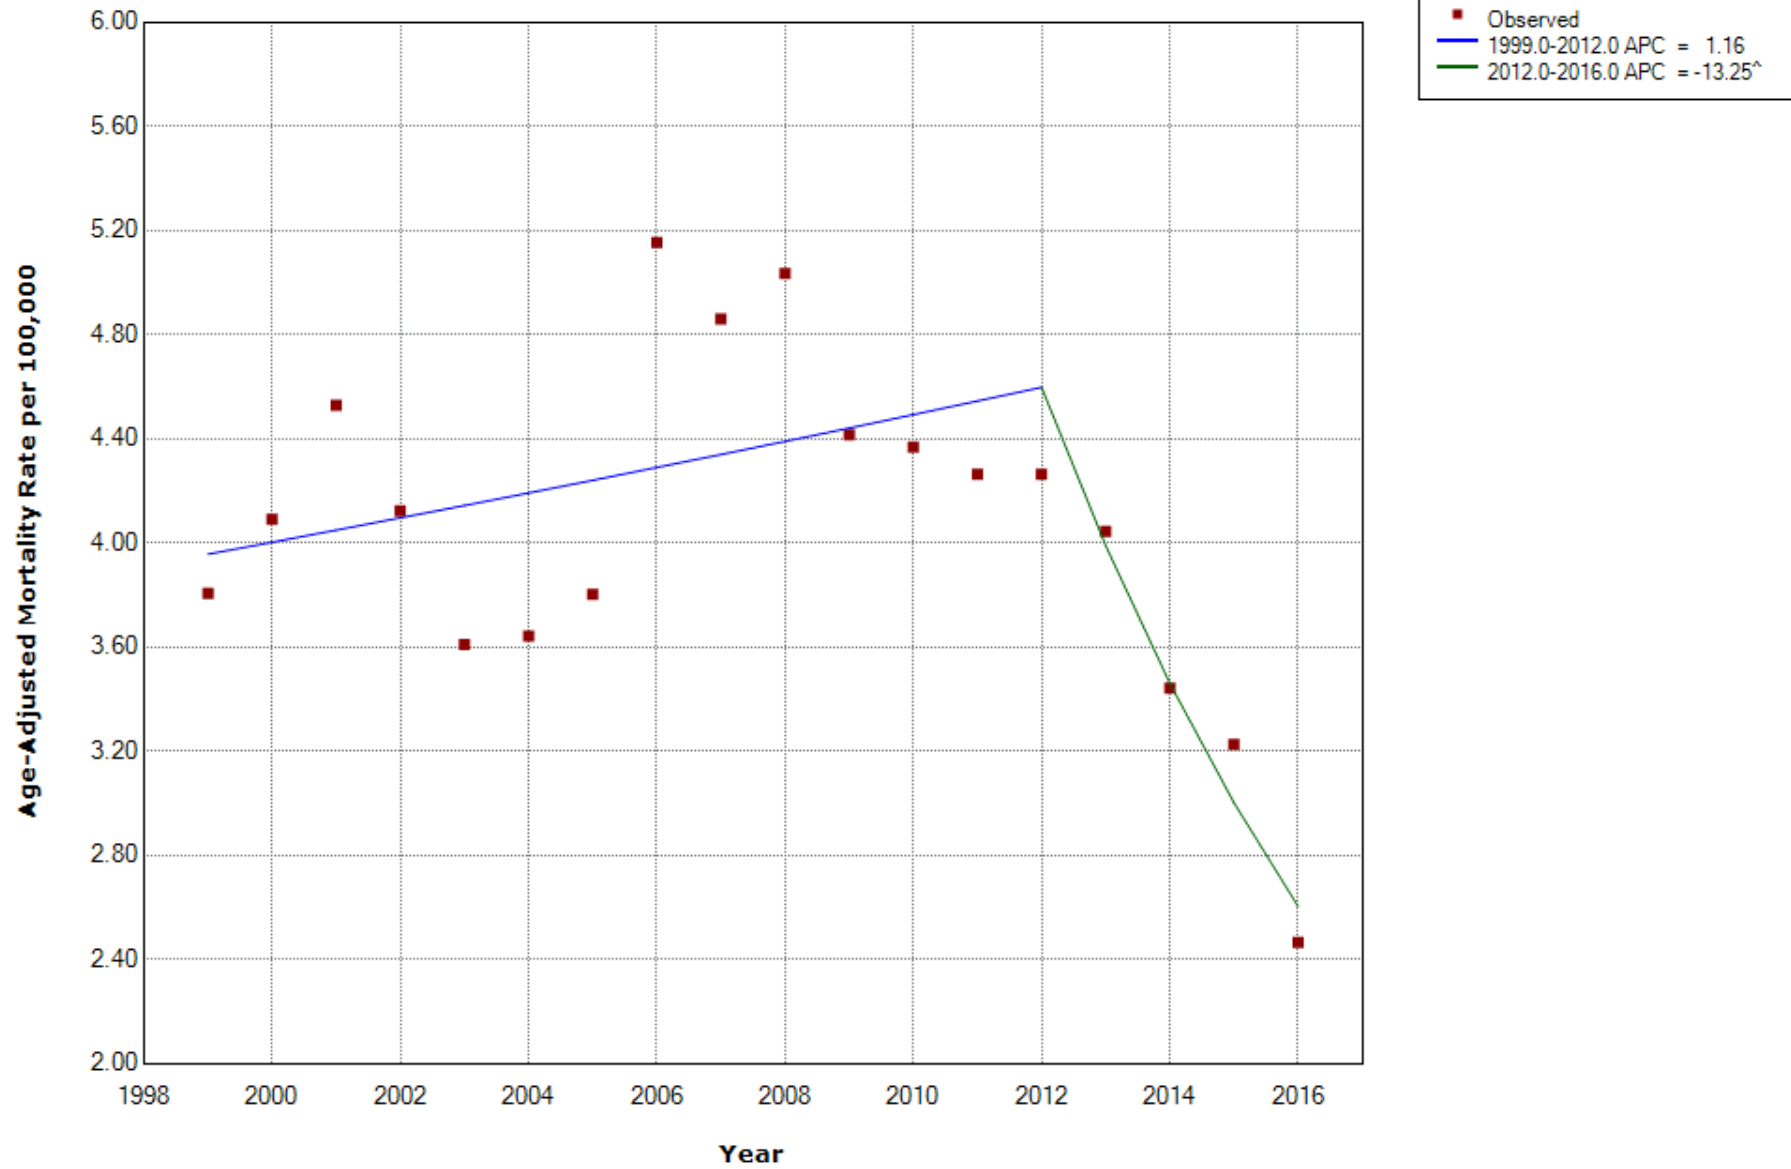

^ Indicates that the Annual Percent Change (APC) is significantly different from zero at the alpha = 0.05 level.  
Final Selected Model: 1 Joinpoint.



### Mental and behavioral disorders due to psychoactive substance use (F10-F19) / NH AIAN: 2 Joinpoints

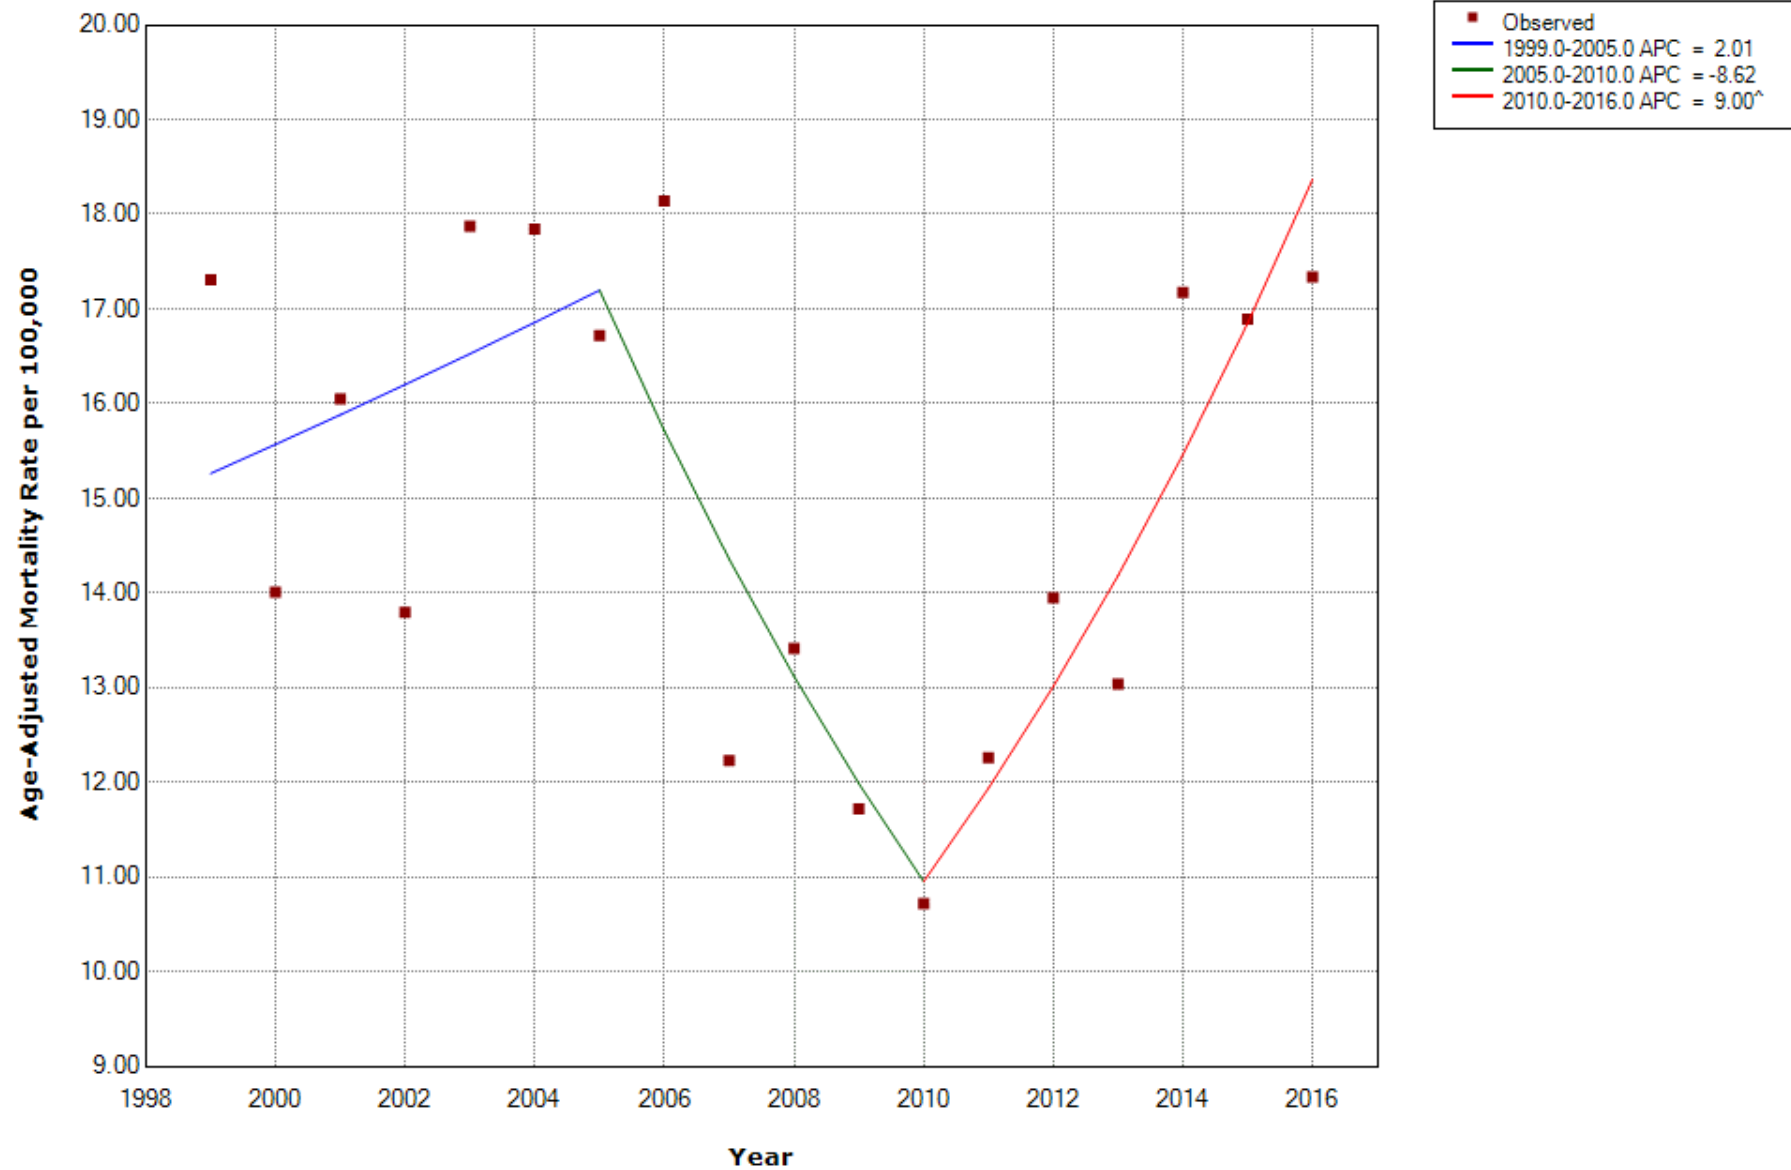

^ Indicates that the Annual Percent Change (APC) is significantly different from zero at the alpha = 0.05 level.  
Final Selected Model: 2 Joinpoints.

Mental and behavioral disorders due to psychoactive substance use (F10-F19) / NH API: 2 Joinpoints

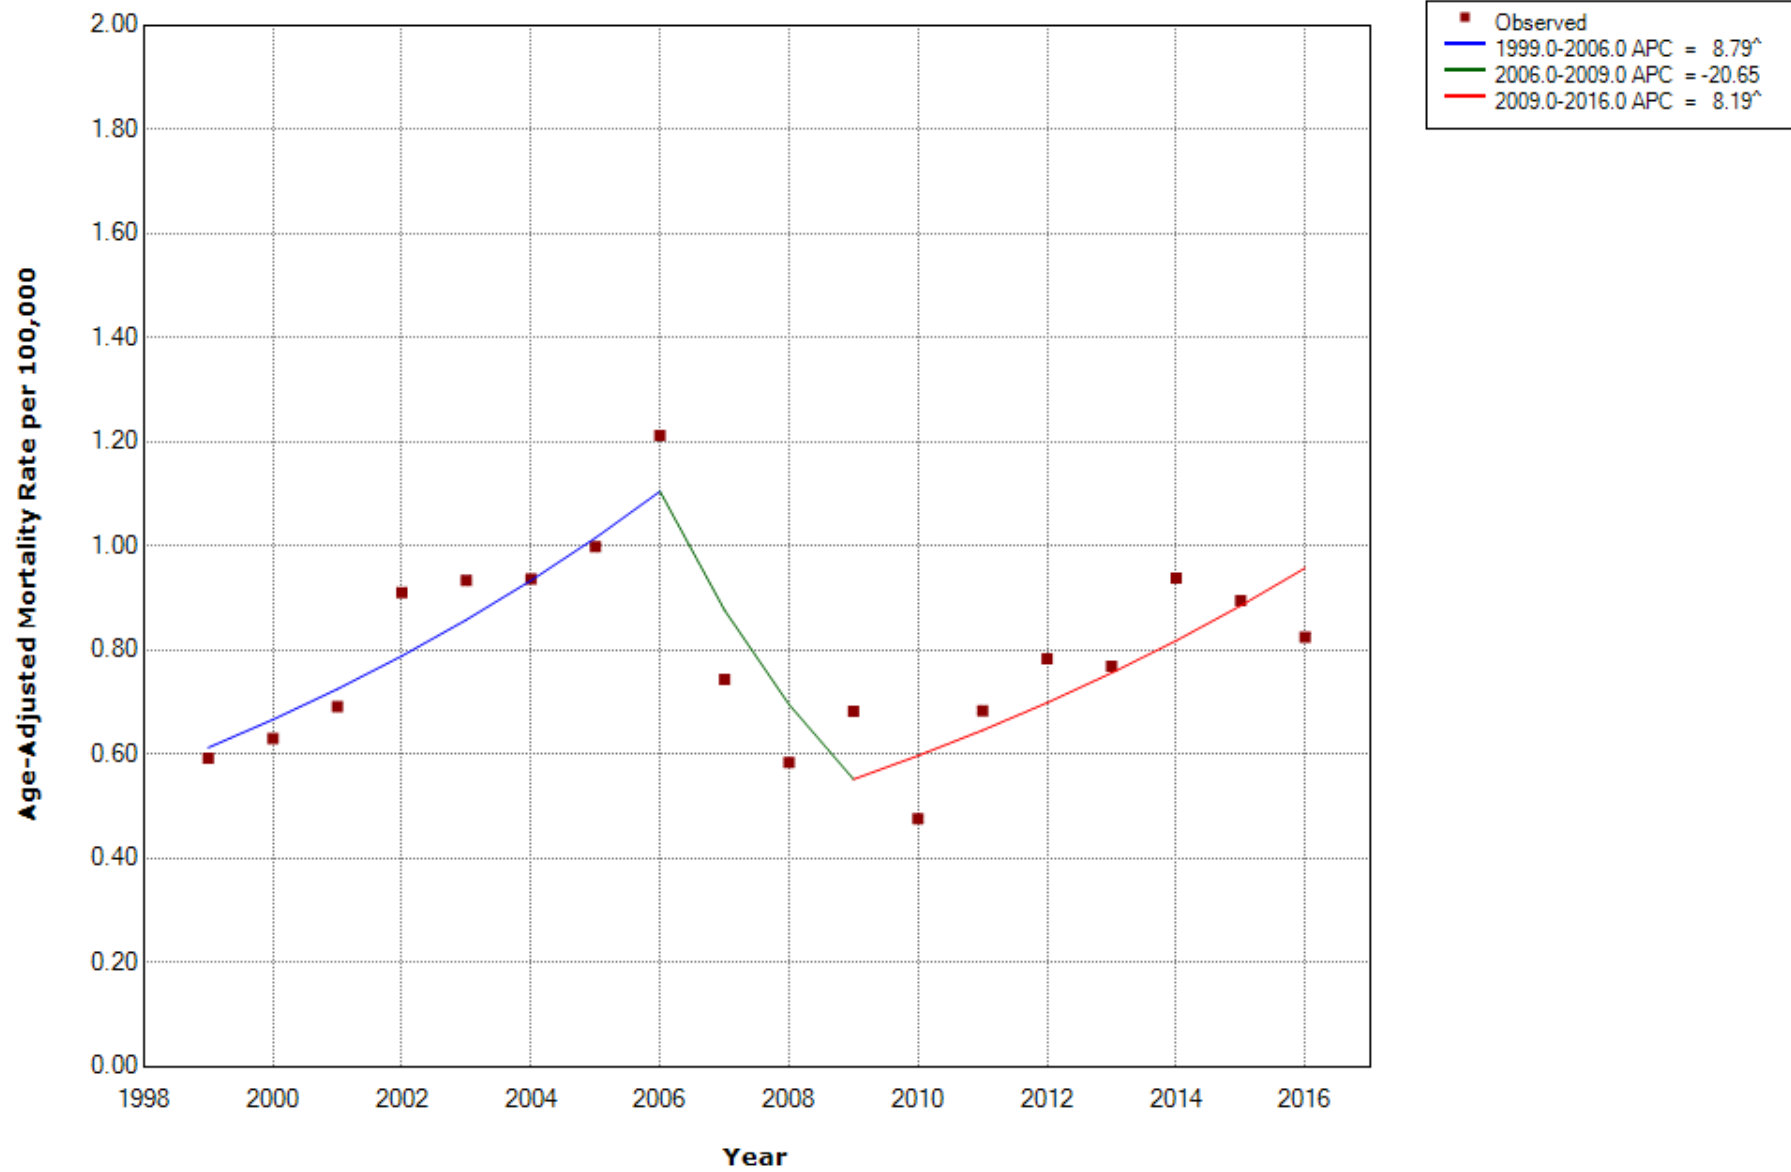

^ Indicates that the Annual Percent Change (APC) is significantly different from zero at the alpha = 0.05 level.  
Final Selected Model: 2 Joinpoints.

### Mental and behavioral disorders due to psychoactive substance use (F10-F19) / NH Blacks: 2 Joinpoints

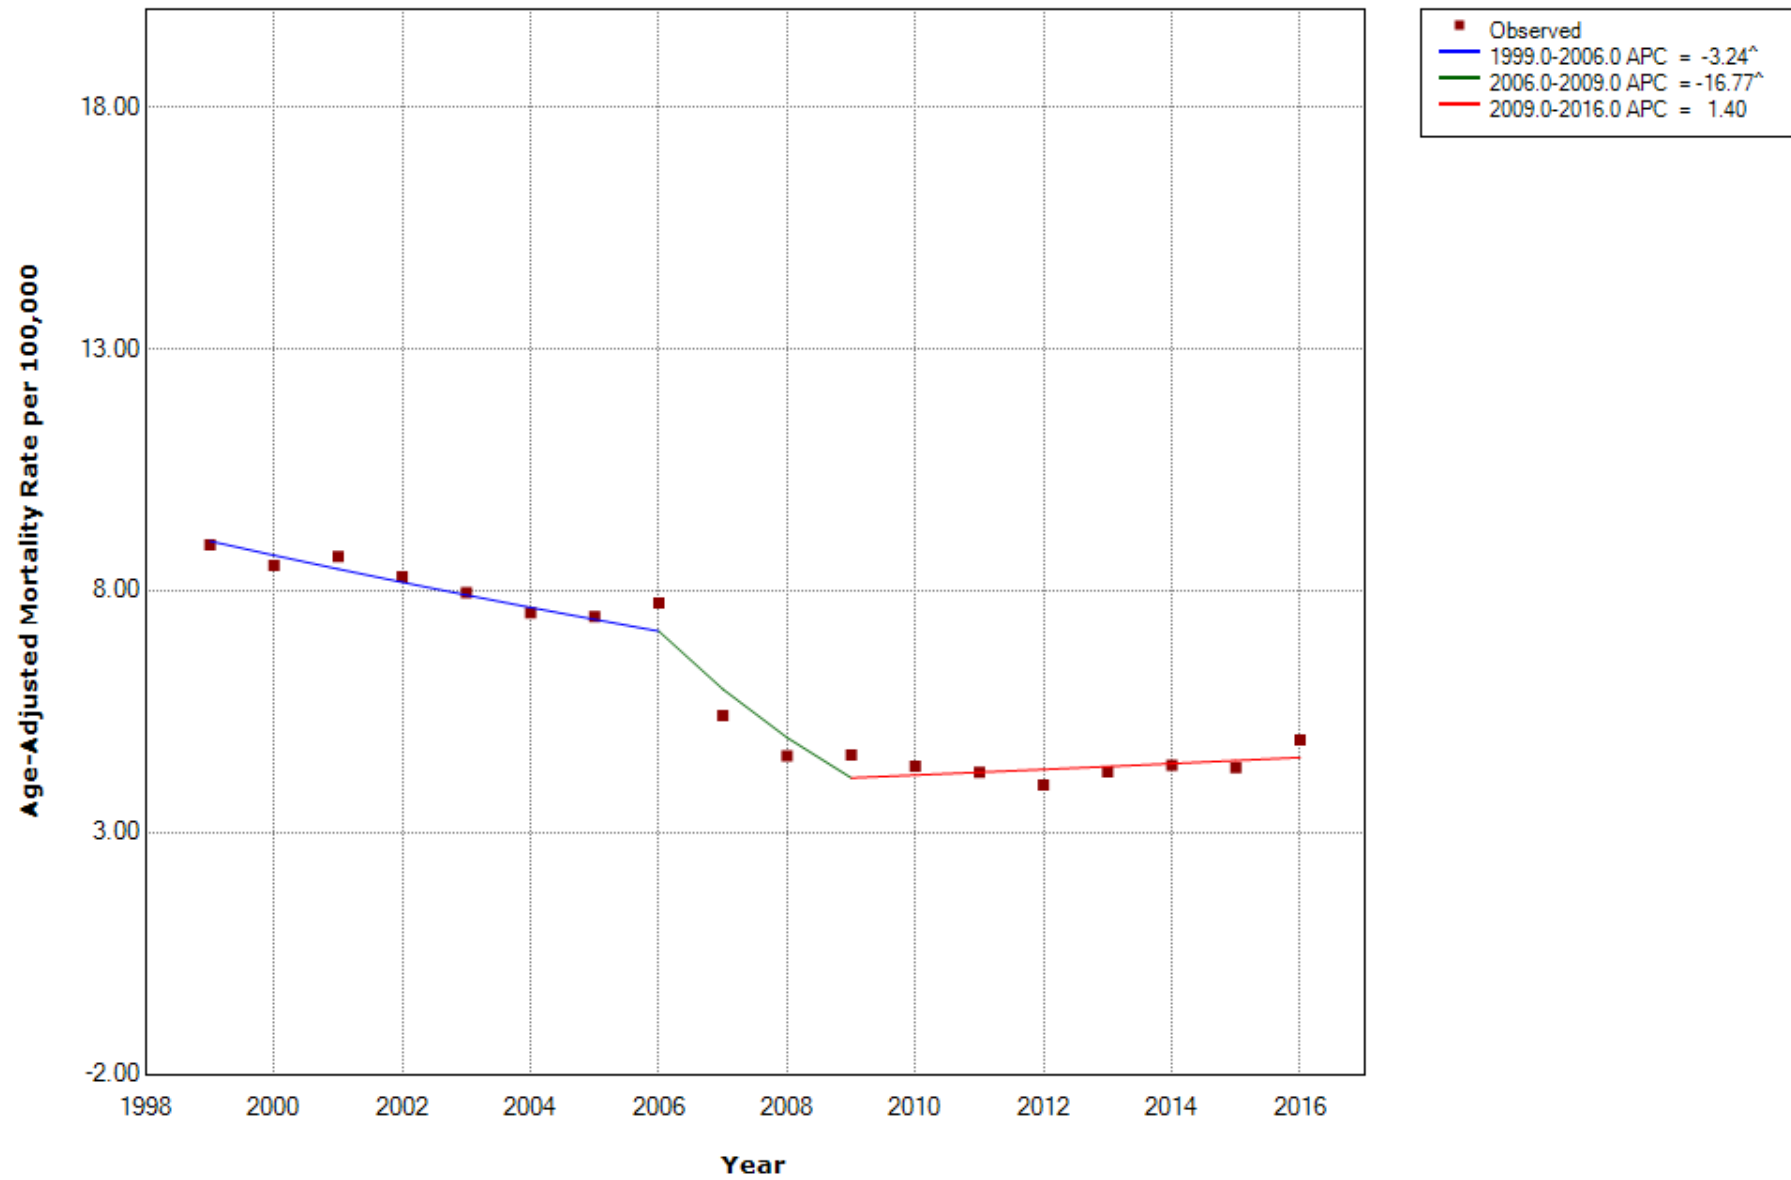

^ Indicates that the Annual Percent Change (APC) is significantly different from zero at the alpha = 0.05 level.  
Final Selected Model: 2 Joinpoints.

### Mental and behavioral disorders due to psychoactive substance use (F10-F19) / NH whites: 2 Joinpoints

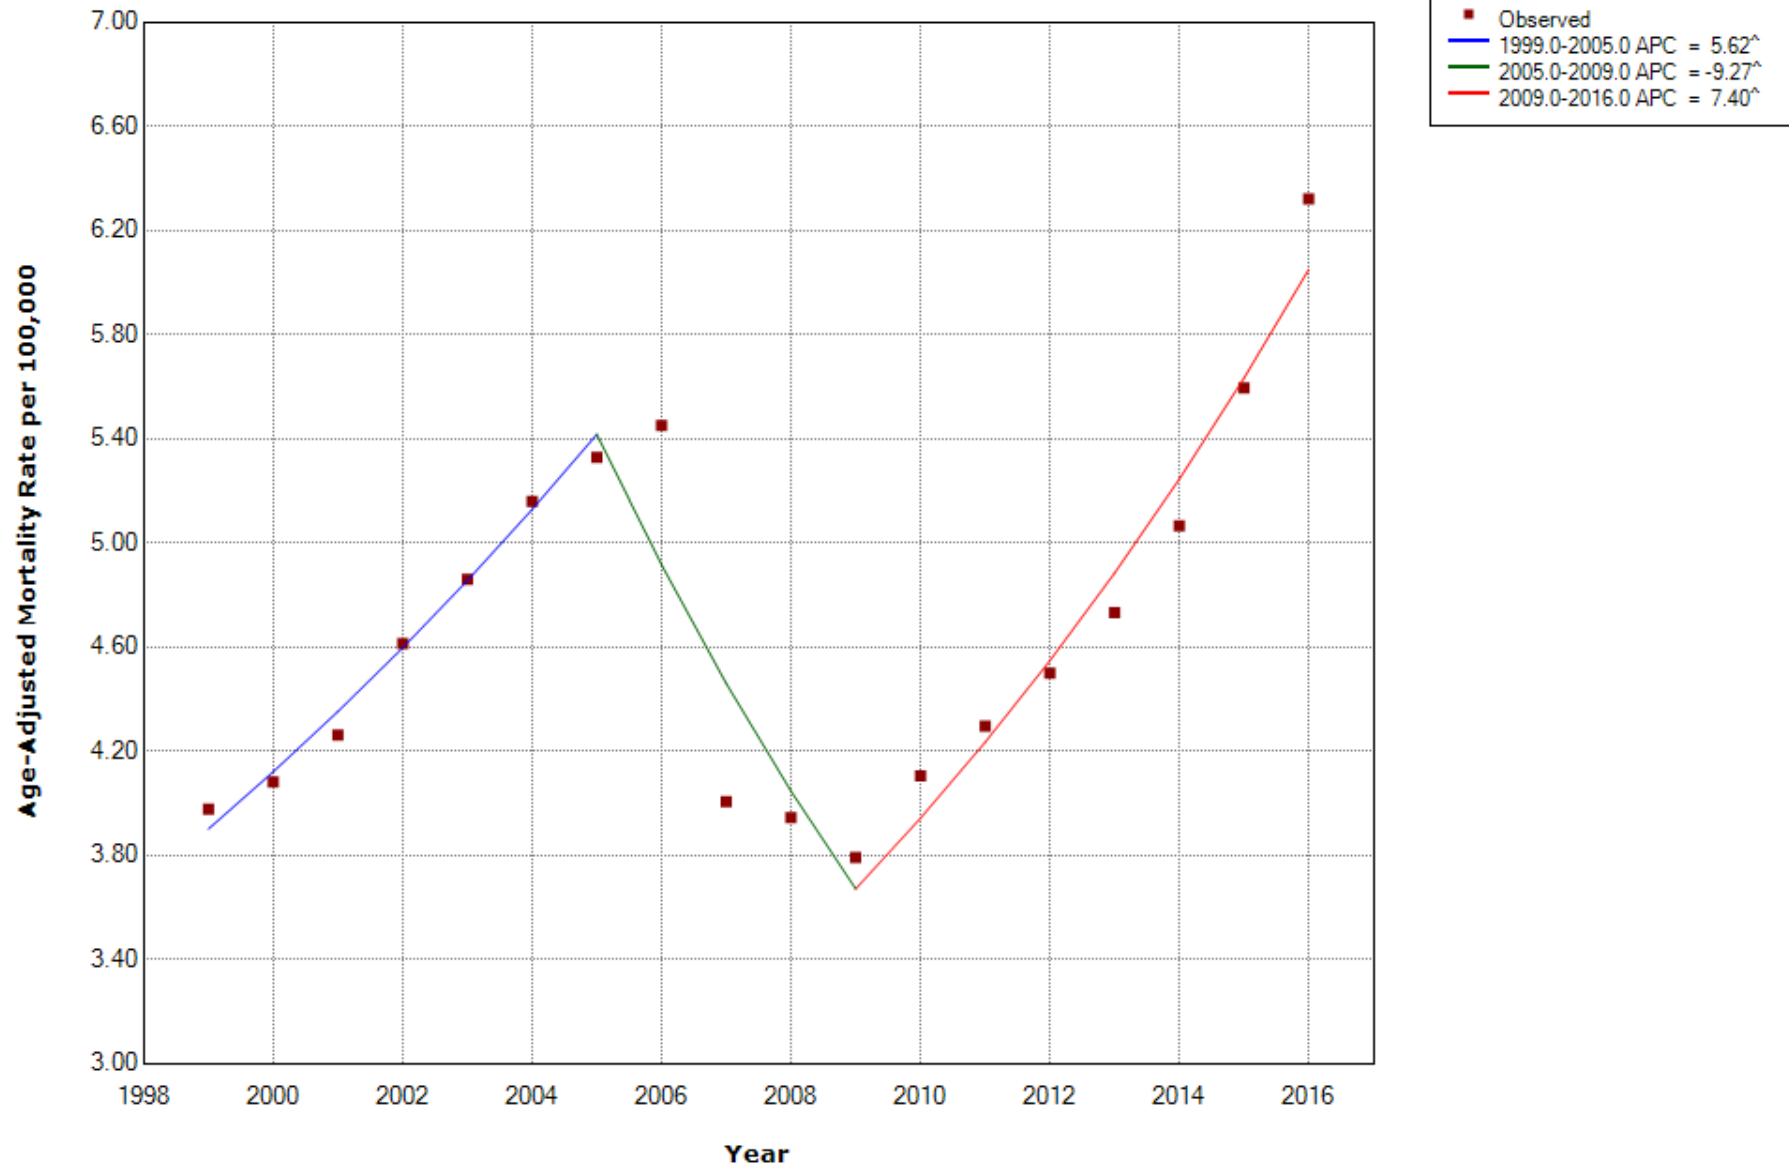

<sup>^</sup> Indicates that the Annual Percent Change (APC) is significantly different from zero at the alpha = 0.05 level.  
Final Selected Model: 2 Joinpoints.

### Mental and behavioral disorders due to psychoactive substance use (F10-F19) / Hispanics: 2 Joinpoints

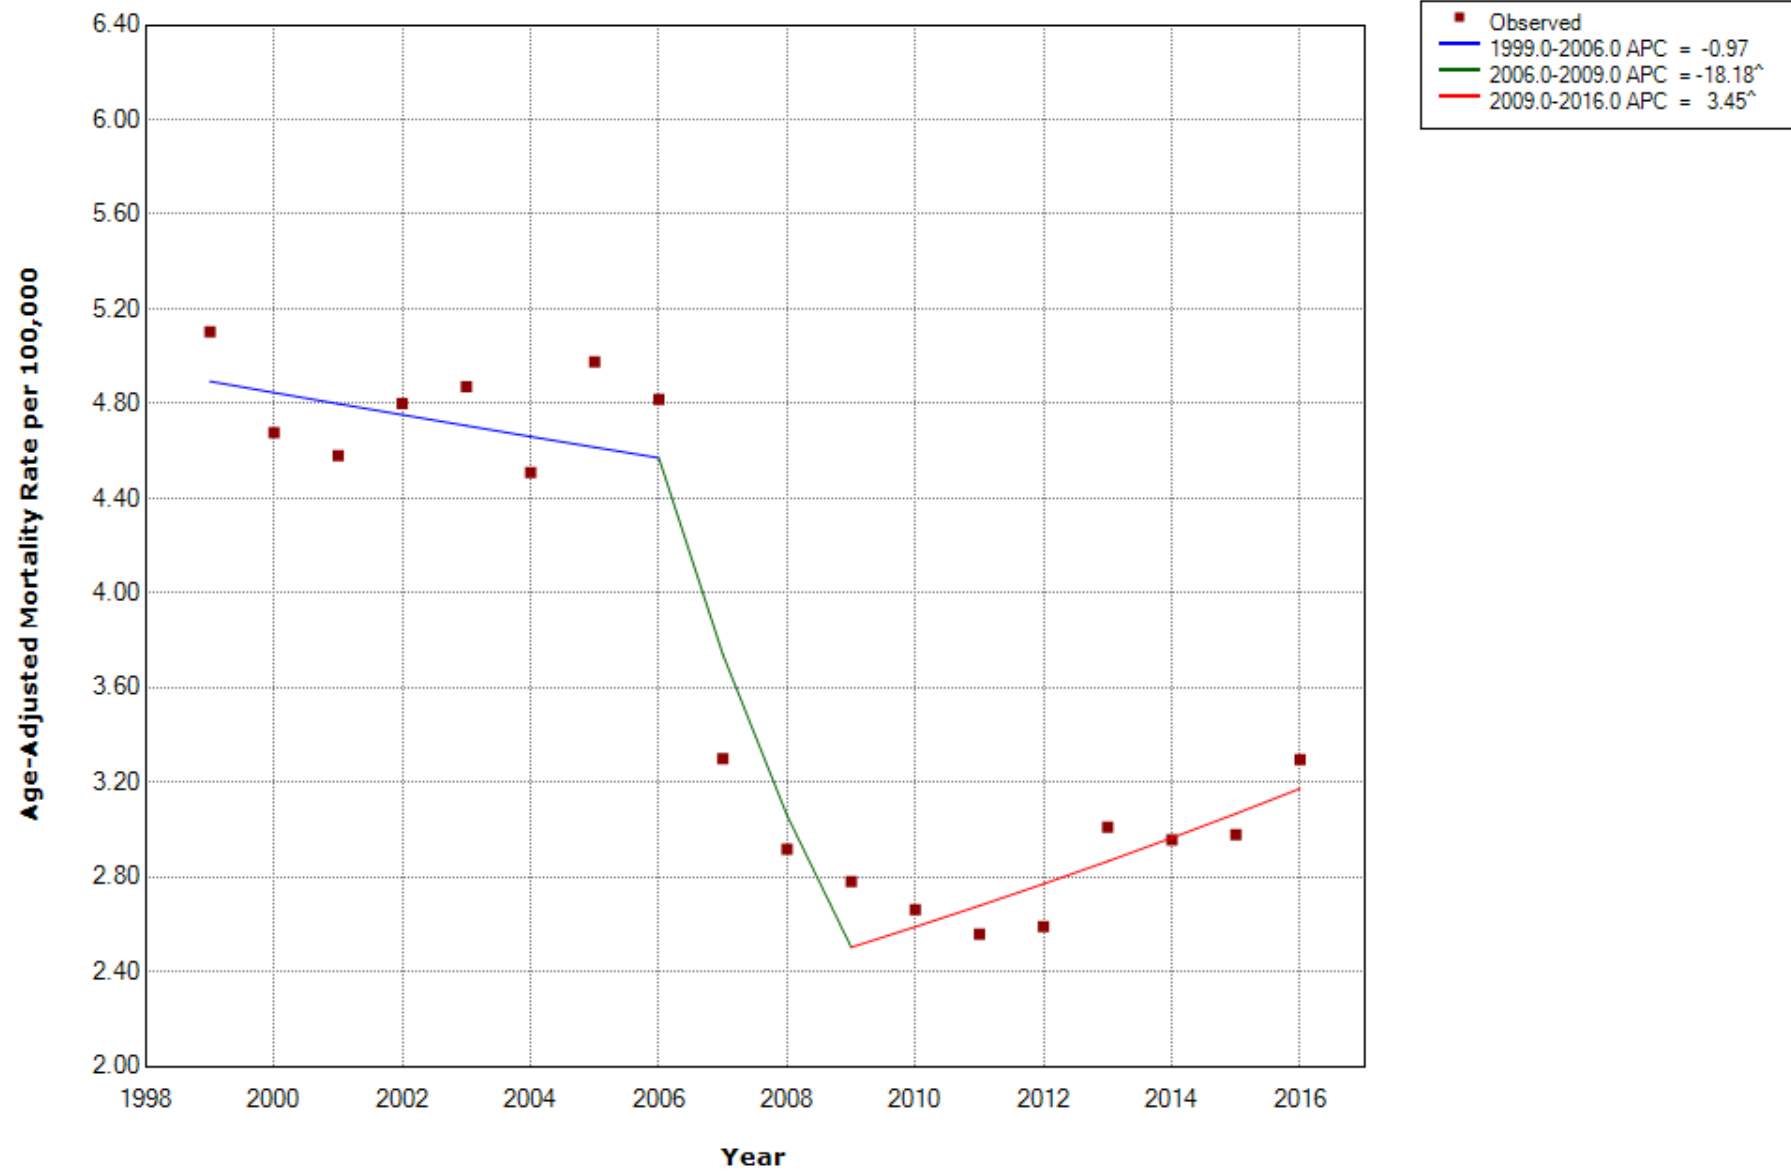

<sup>^</sup> Indicates that the Annual Percent Change (APC) is significantly different from zero at the alpha = 0.05 level.  
Final Selected Model: 2 Joinpoints.

**Organic mental disorders, including vascular dementia ( F01-F09 ) / NH AIAN: Observed**



■ Observed

^ Indicates that the Annual Percent Change (APC) is significantly different from zero at the alpha = 0.05 level.

\*\* Joinpoint cannot process records with missing dependent variable values. Joinpoint will not analyze by-groups that have this error. (Row = 1980, Col = 1)

### Organic mental disorders, including vascular dementia ( F01-F09 ) / NH API: Observed

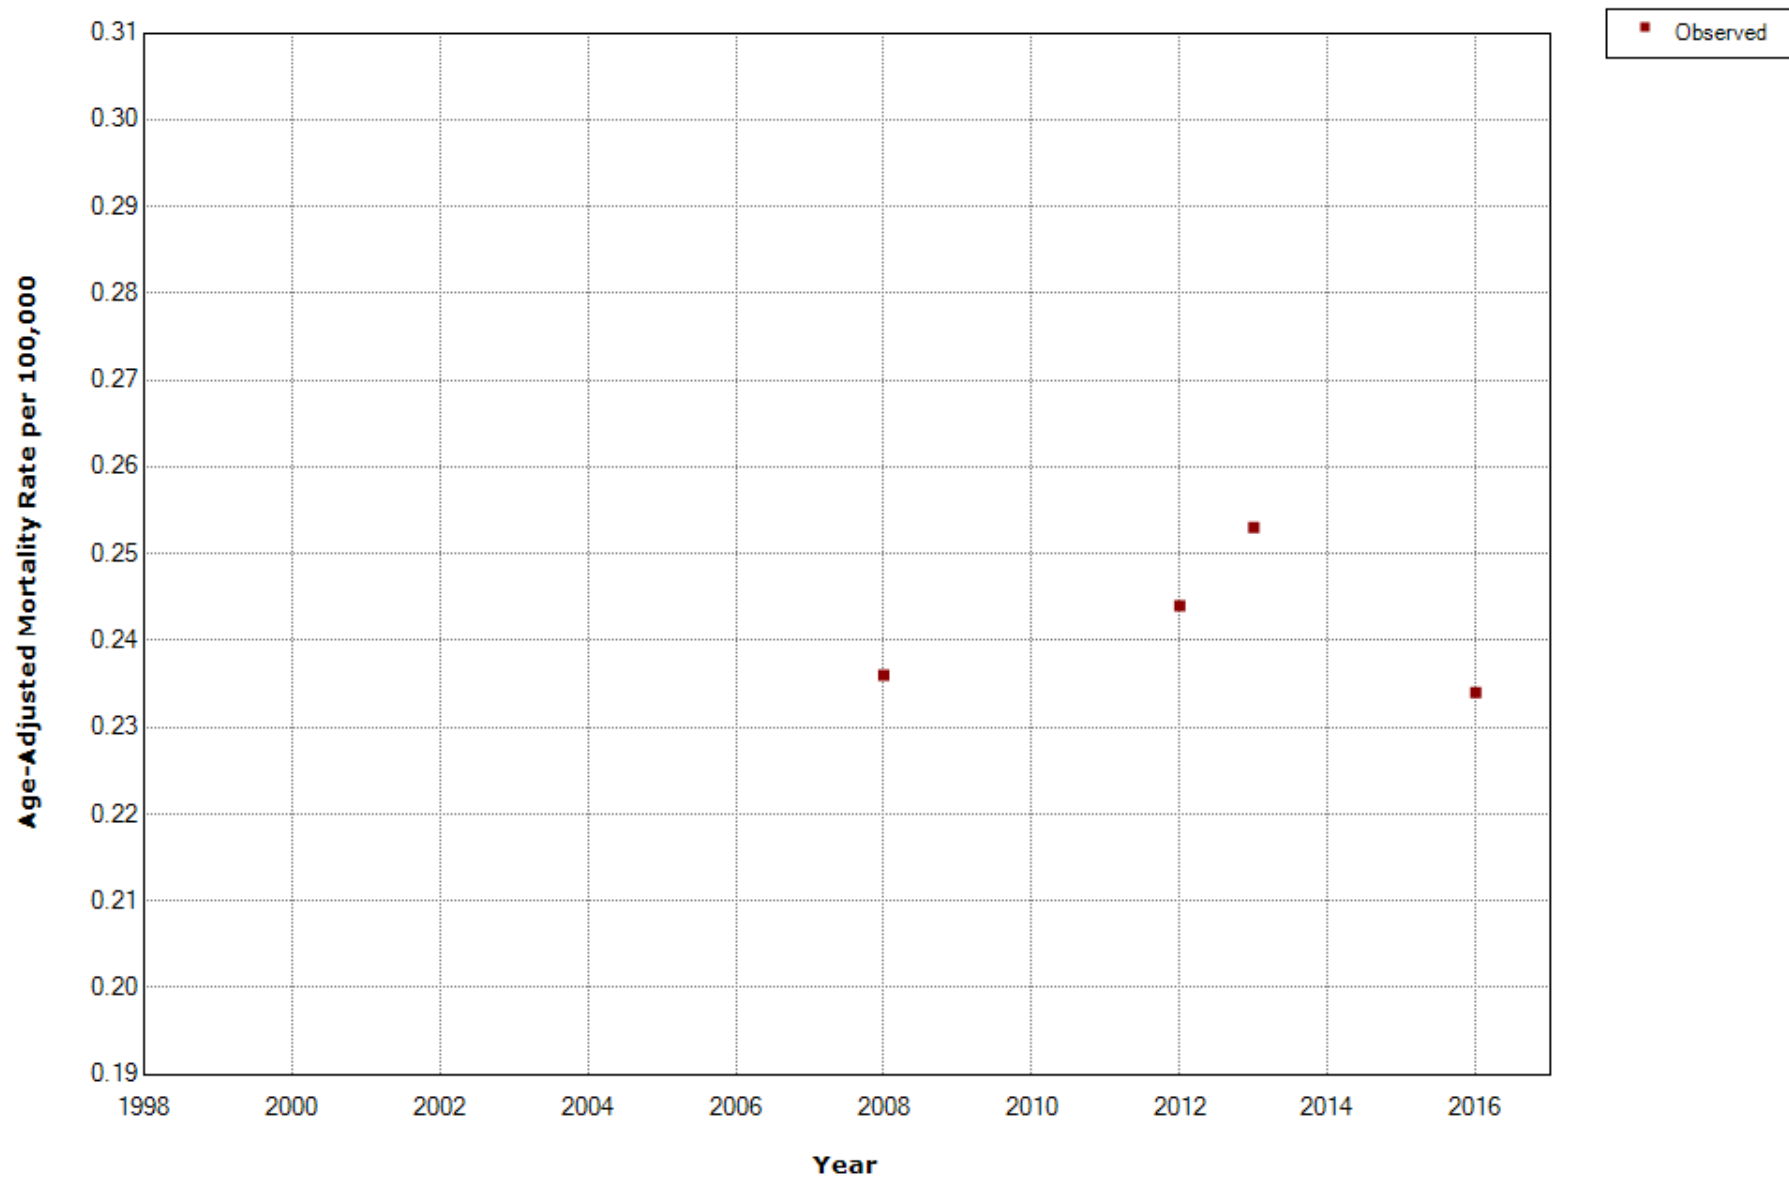

^ Indicates that the Annual Percent Change (APC) is significantly different from zero at the alpha = 0.05 level.

\* Joinpoint cannot process records with missing dependent variable values. Joinpoint will not analyze by-groups that have this error. (Row = 1998, Col = 1)

Organic mental disorders, including vascular dementia ( F01-F09 ) / NH Blacks: 1 Joinpoint

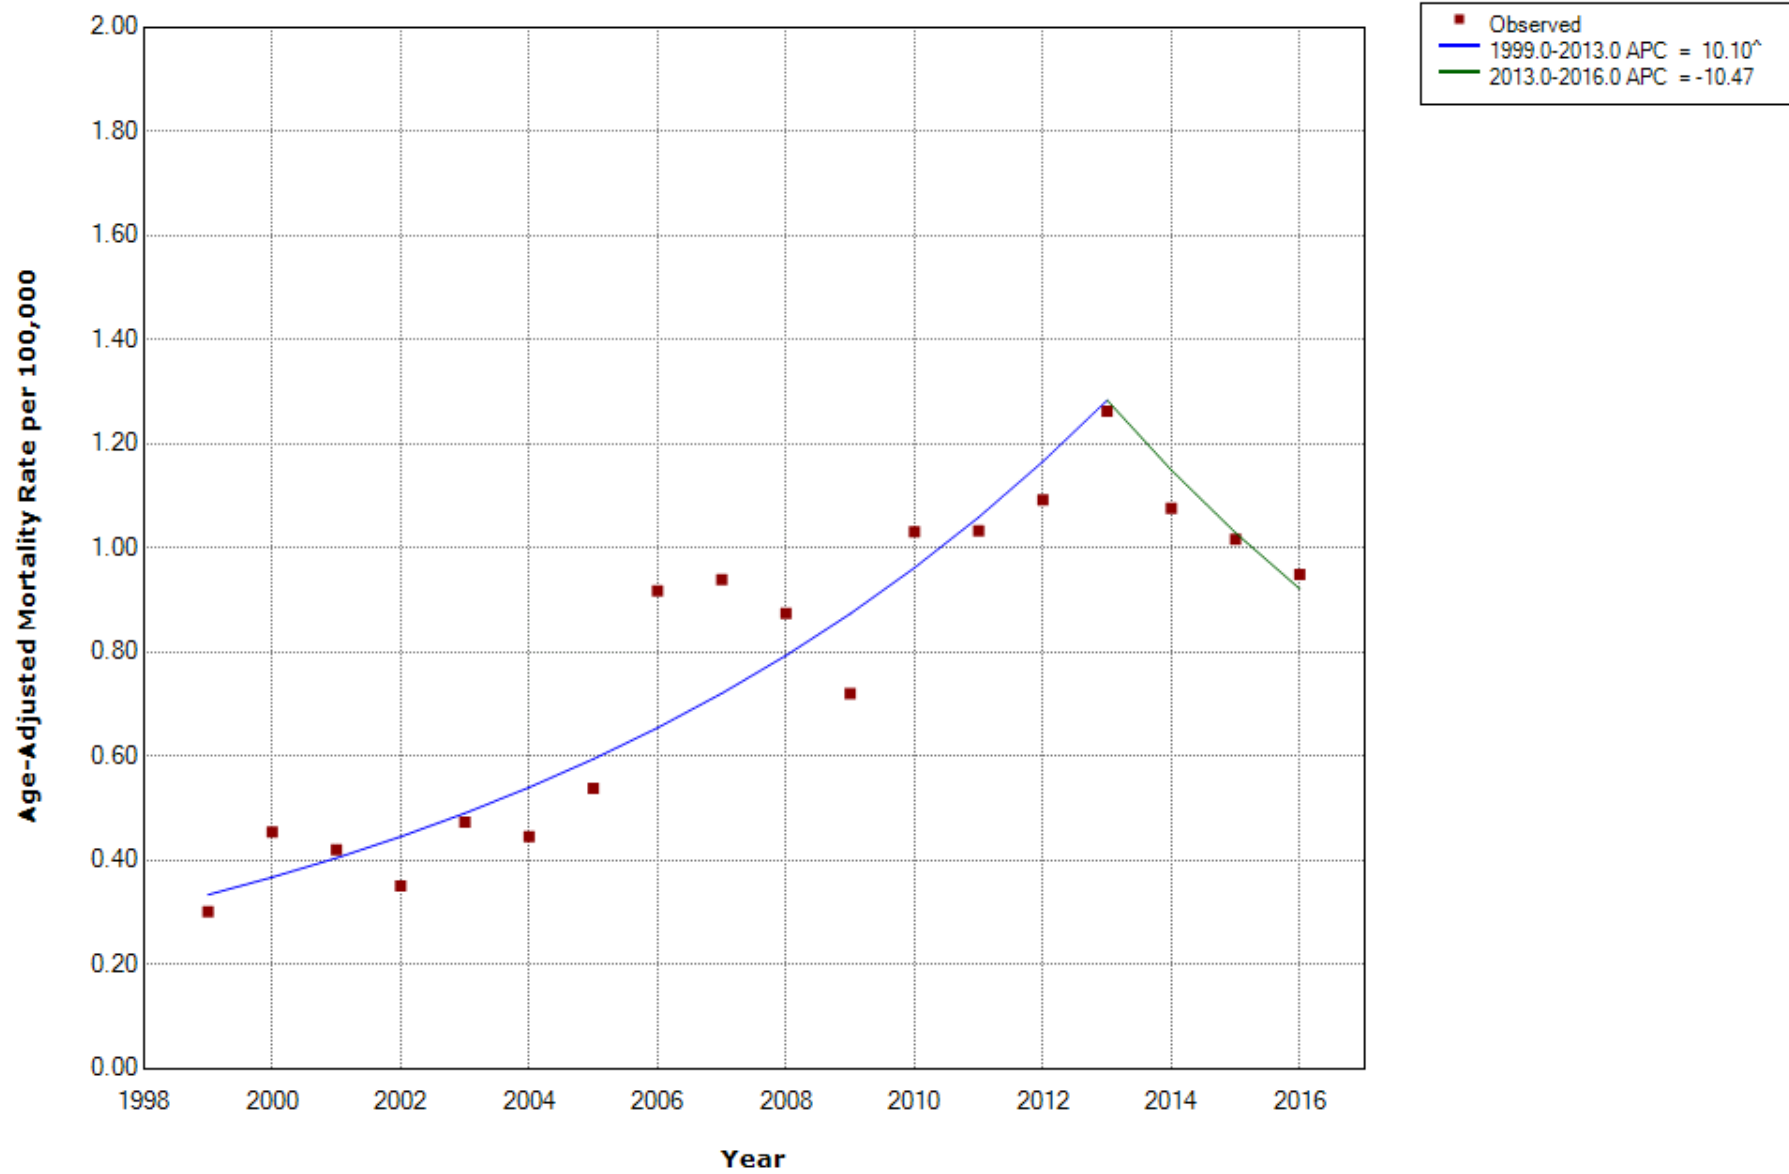

^ Indicates that the Annual Percent Change (APC) is significantly different from zero at the alpha = 0.05 level.  
Final Selected Model: 1 Joinpoint.



### Organic mental disorders, including vascular dementia ( F01-F09 ) / NH whites: 3 Joinpoints

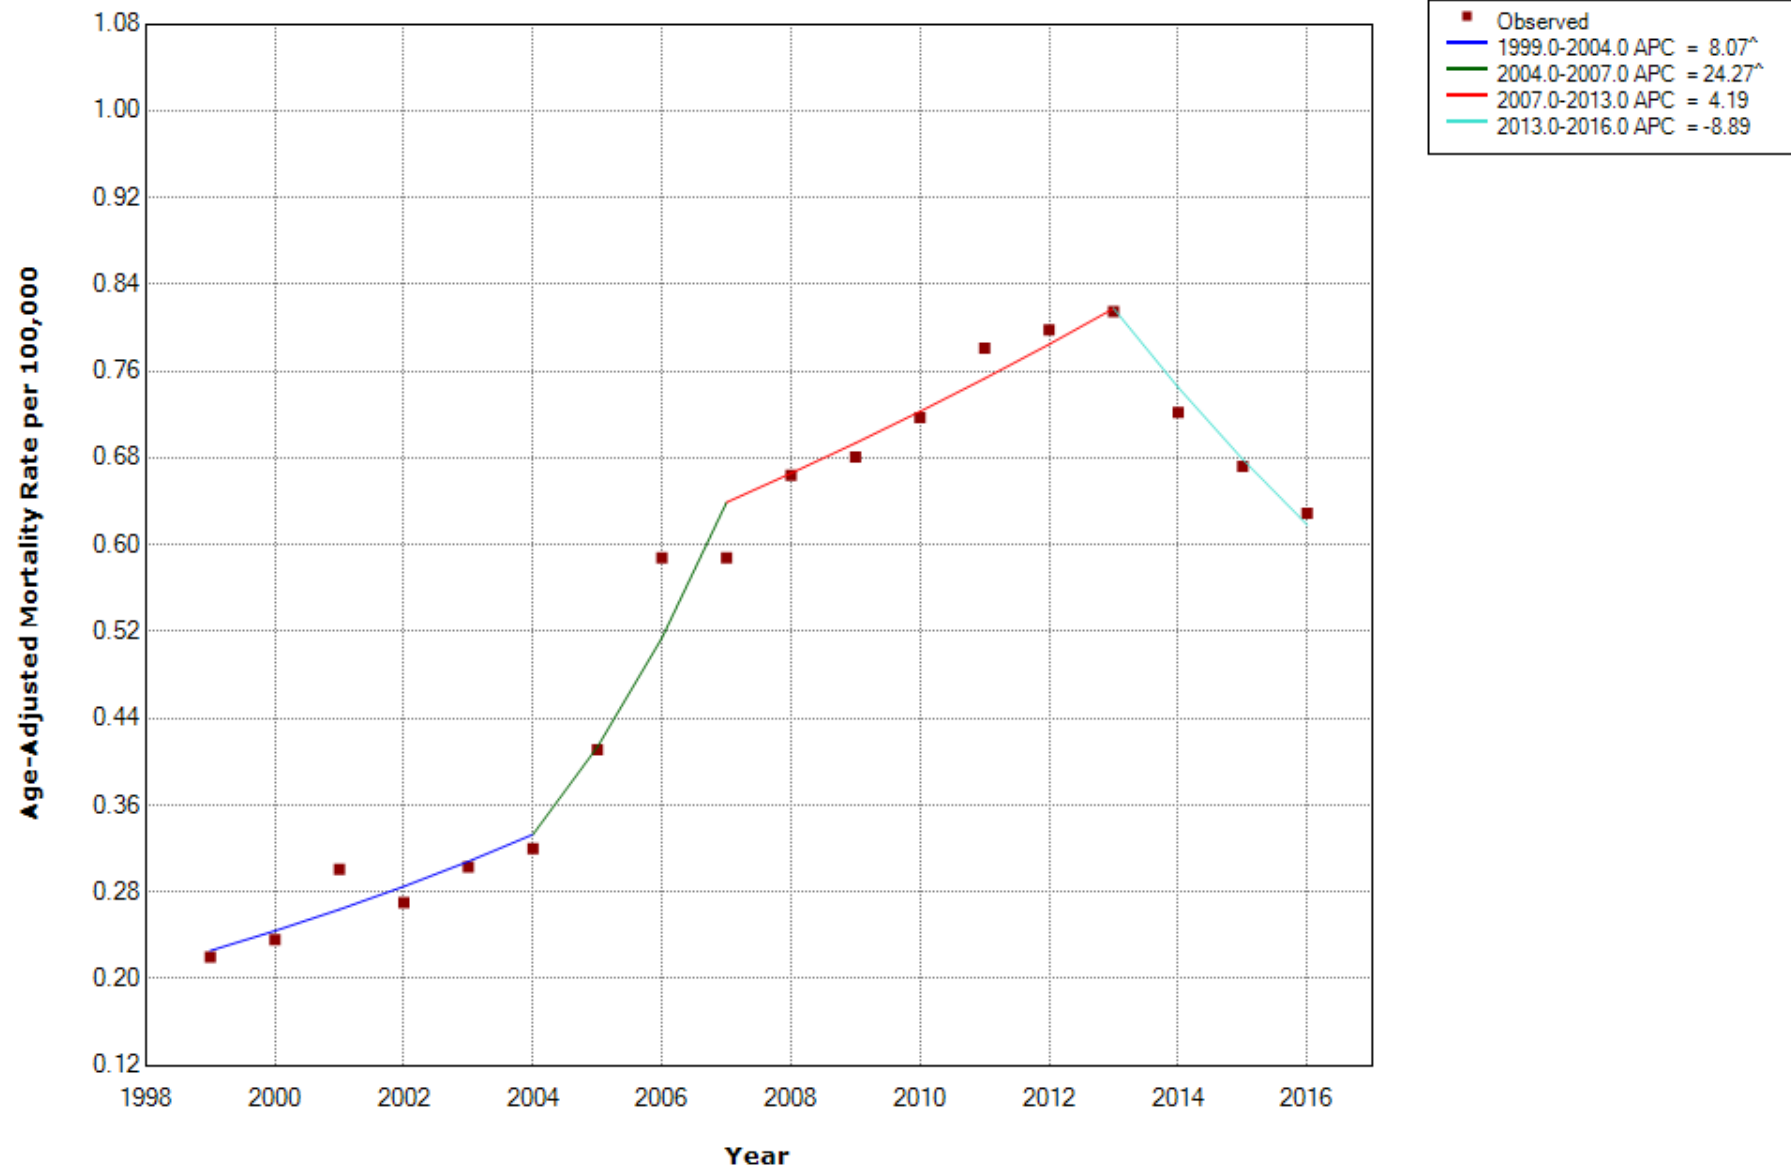

<sup>^</sup> Indicates that the Annual Percent Change (APC) is significantly different from zero at the alpha = 0.05 level.  
Final Selected Model: 3 Joinpoints.

### Organic mental disorders, including vascular dementia ( F01-F09 ) / Hispanics: Observed

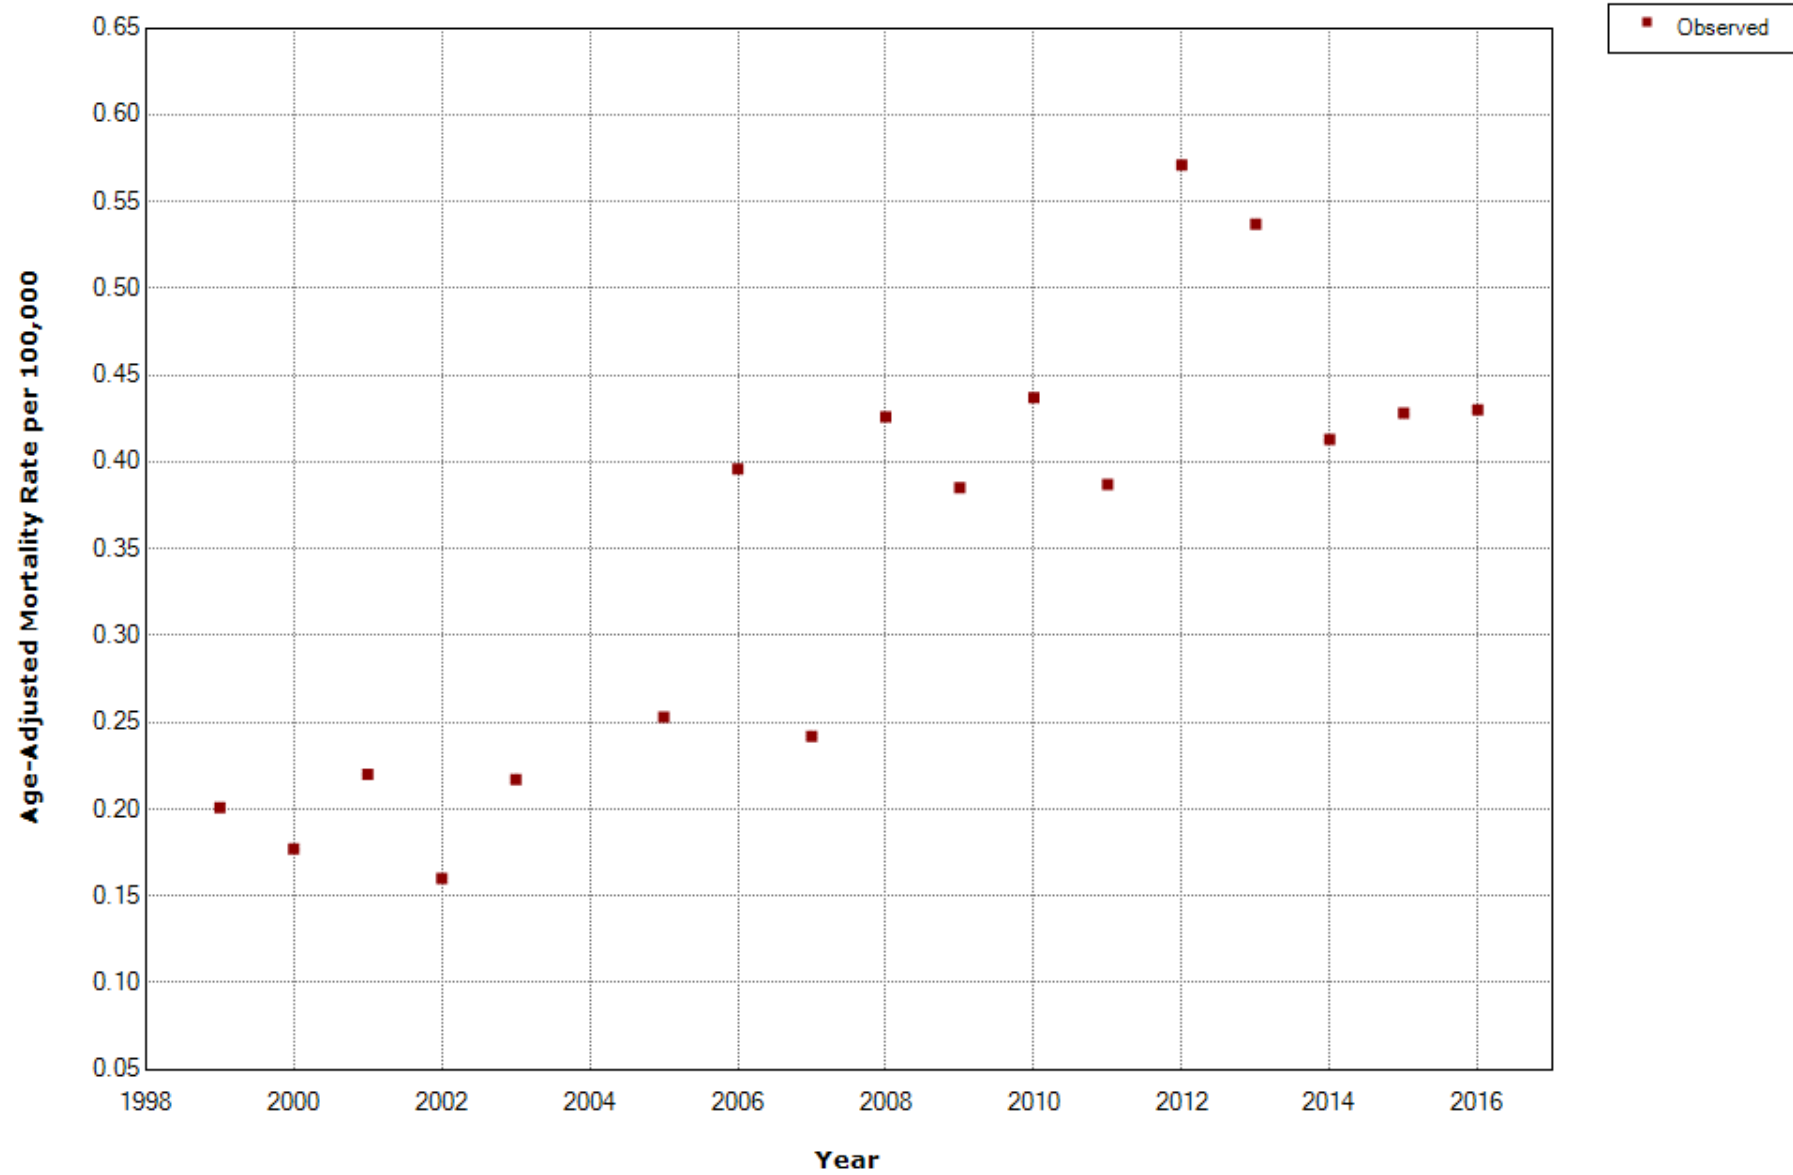

^ Indicates that the Annual Percent Change (APC) is significantly different from zero at the alpha = 0.05 level.

\* Joinpoint cannot process records with missing dependent variable values. Joinpoint will not analyze by-groups that have this error. (Row = 2057, Col = 1)

### Episodic and paroxysmal disorders, including epilepsy (G40-G47) / NH AIAN: Observed

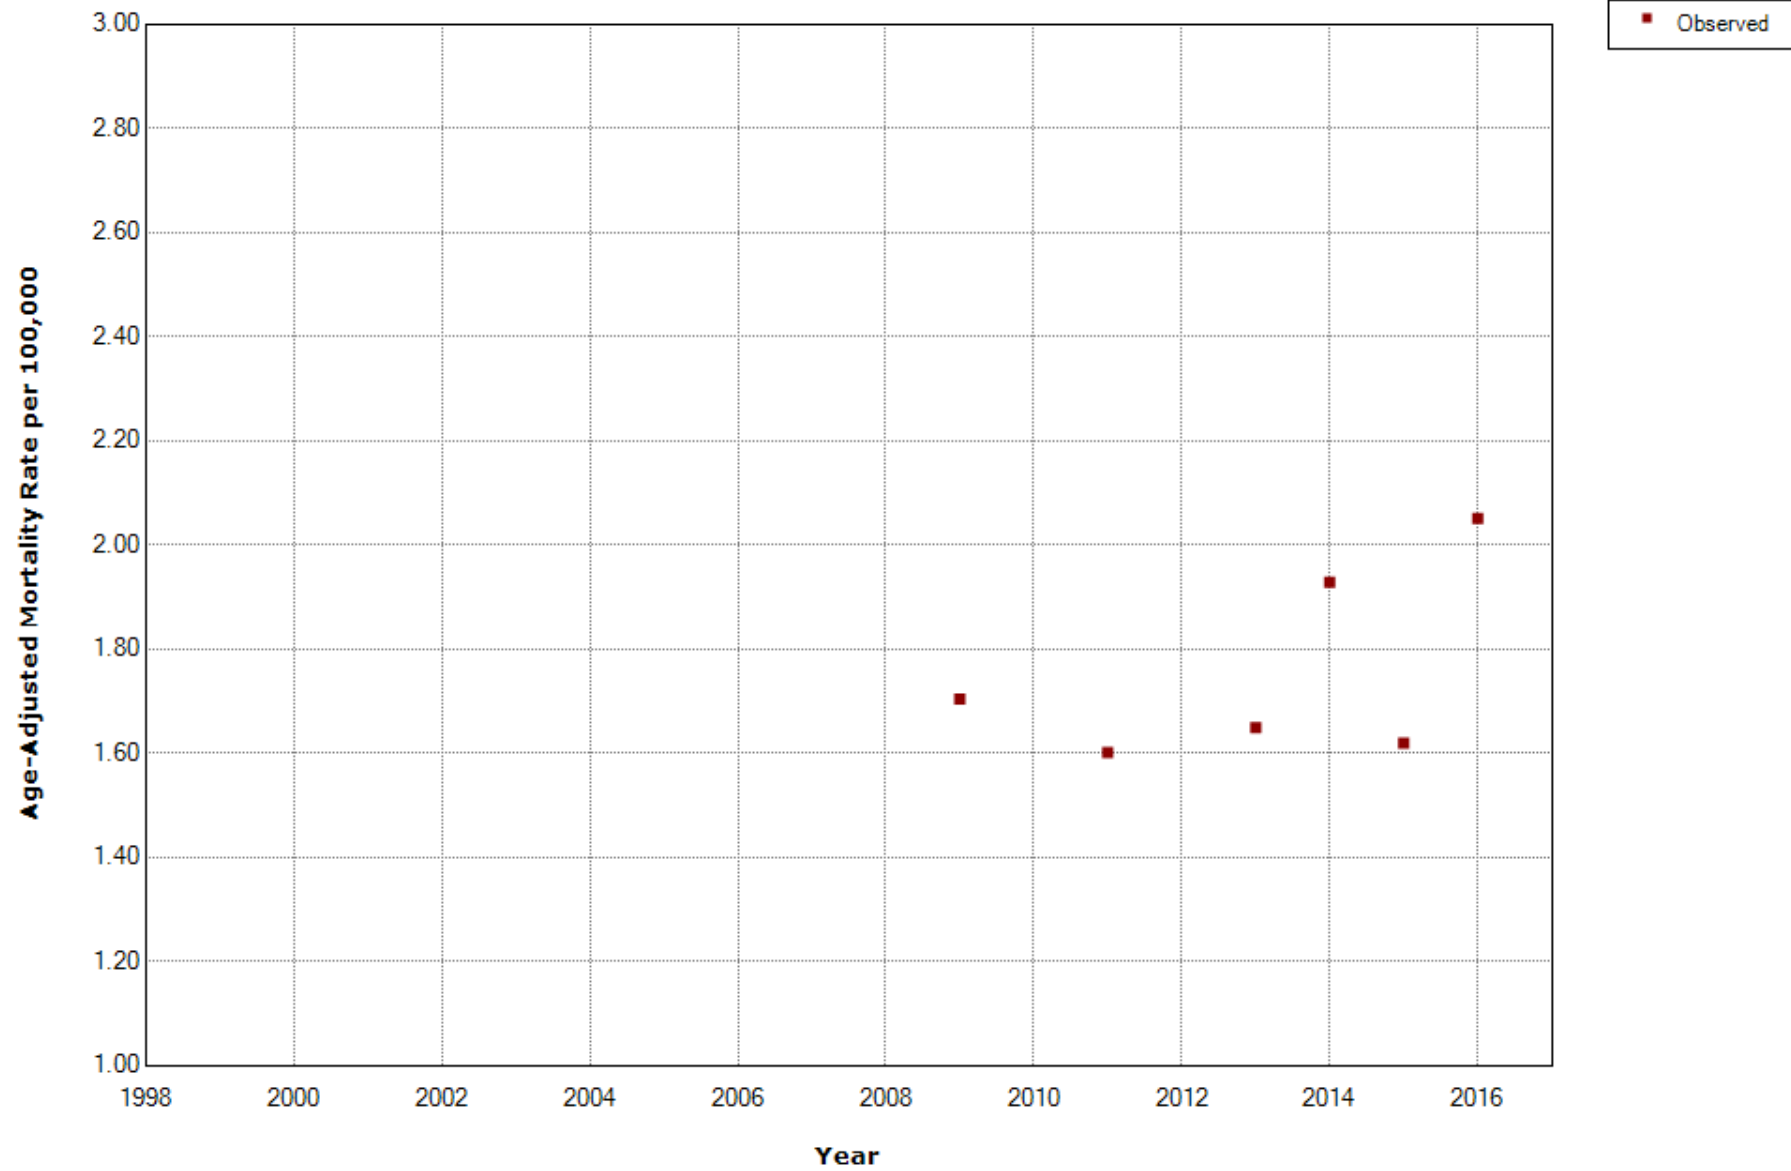

^ Indicates that the Annual Percent Change (APC) is significantly different from zero at the alpha = 0.05 level.

\* Joinpoint cannot process records with missing dependent variable values. Joinpoint will not analyze by-groups that have this error. (Row = 2070, Col = 1)

### Episodic and paroxysmal disorders, including epilepsy (G40-G47) / NH API: Observed

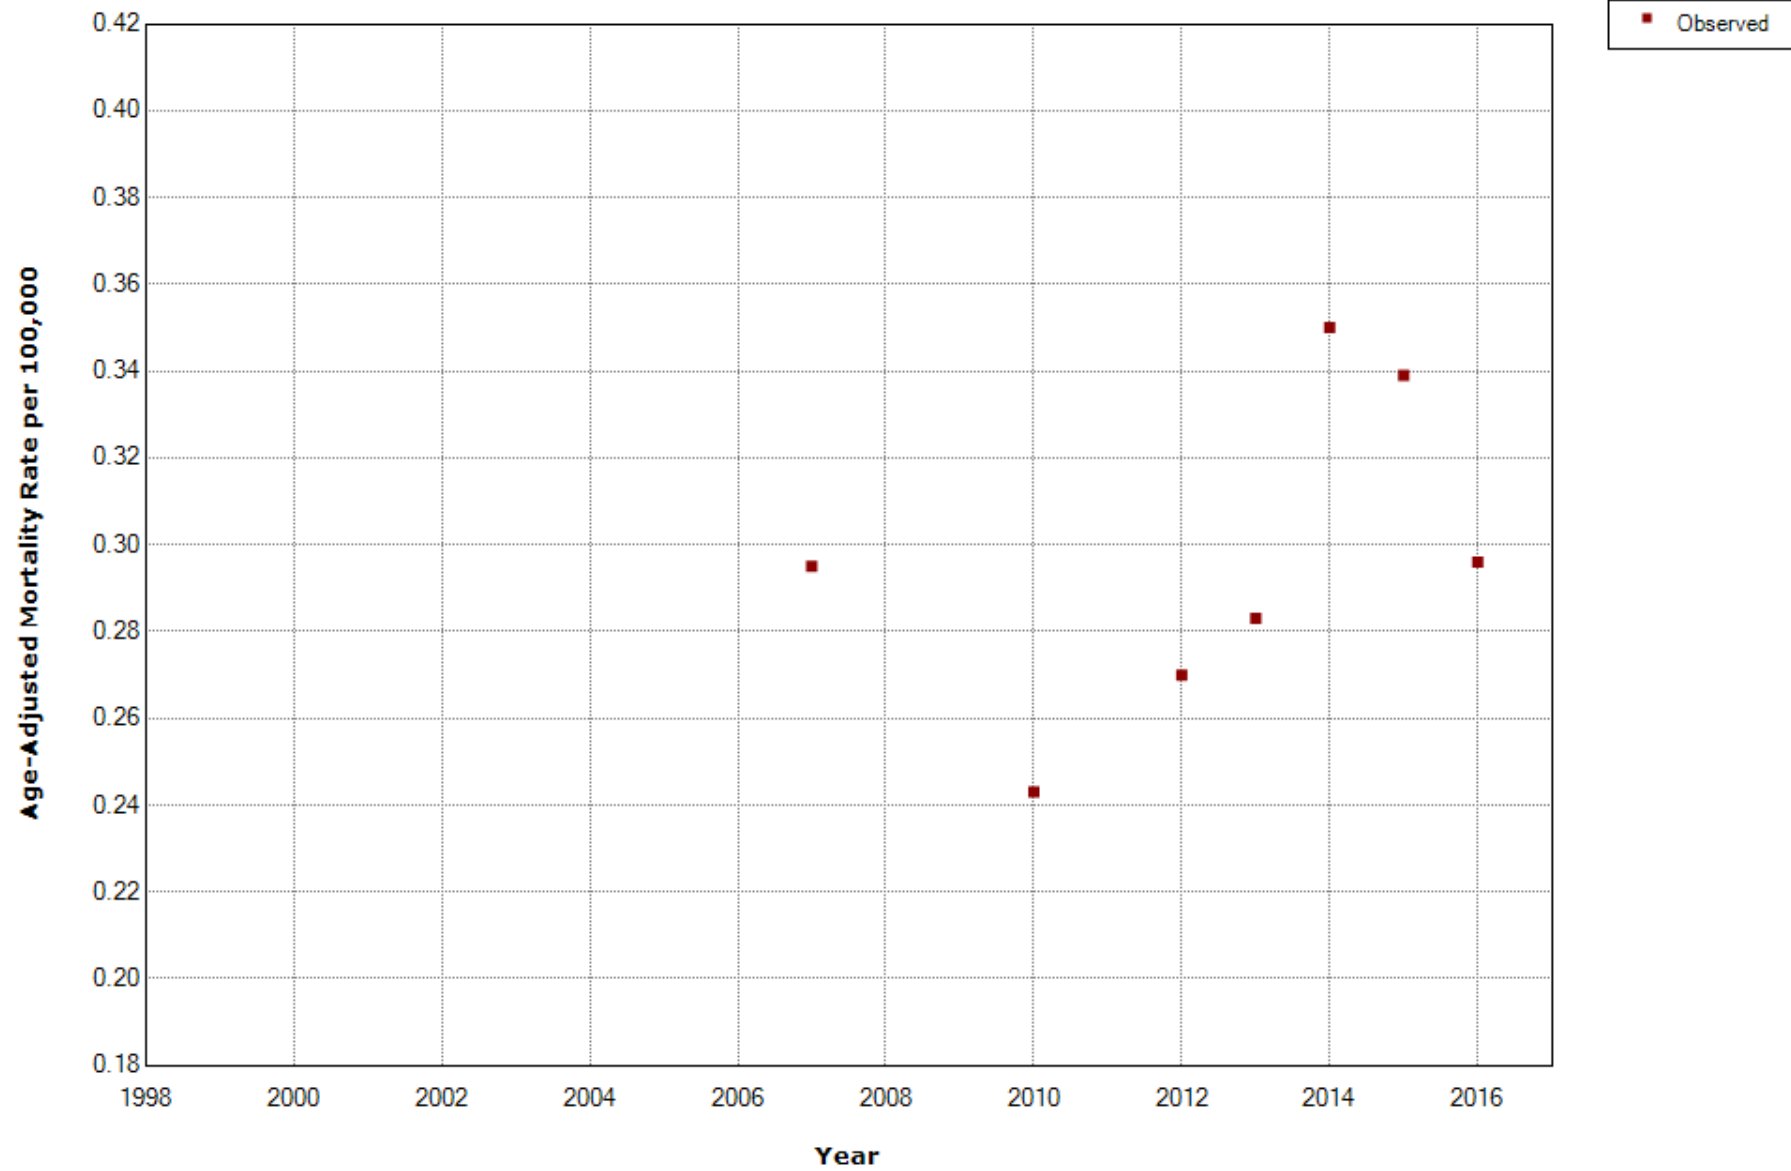

^ Indicates that the Annual Percent Change (APC) is significantly different from zero at the alpha = 0.05 level.

\* Joinpoint cannot process records with missing dependent variable values. Joinpoint will not analyze by-groups that have this error. (Row = 2088, Col = 1)

Episodic and paroxysmal disorders, including epilepsy (G40-G47) / NH Blacks: 0 Joinpoints

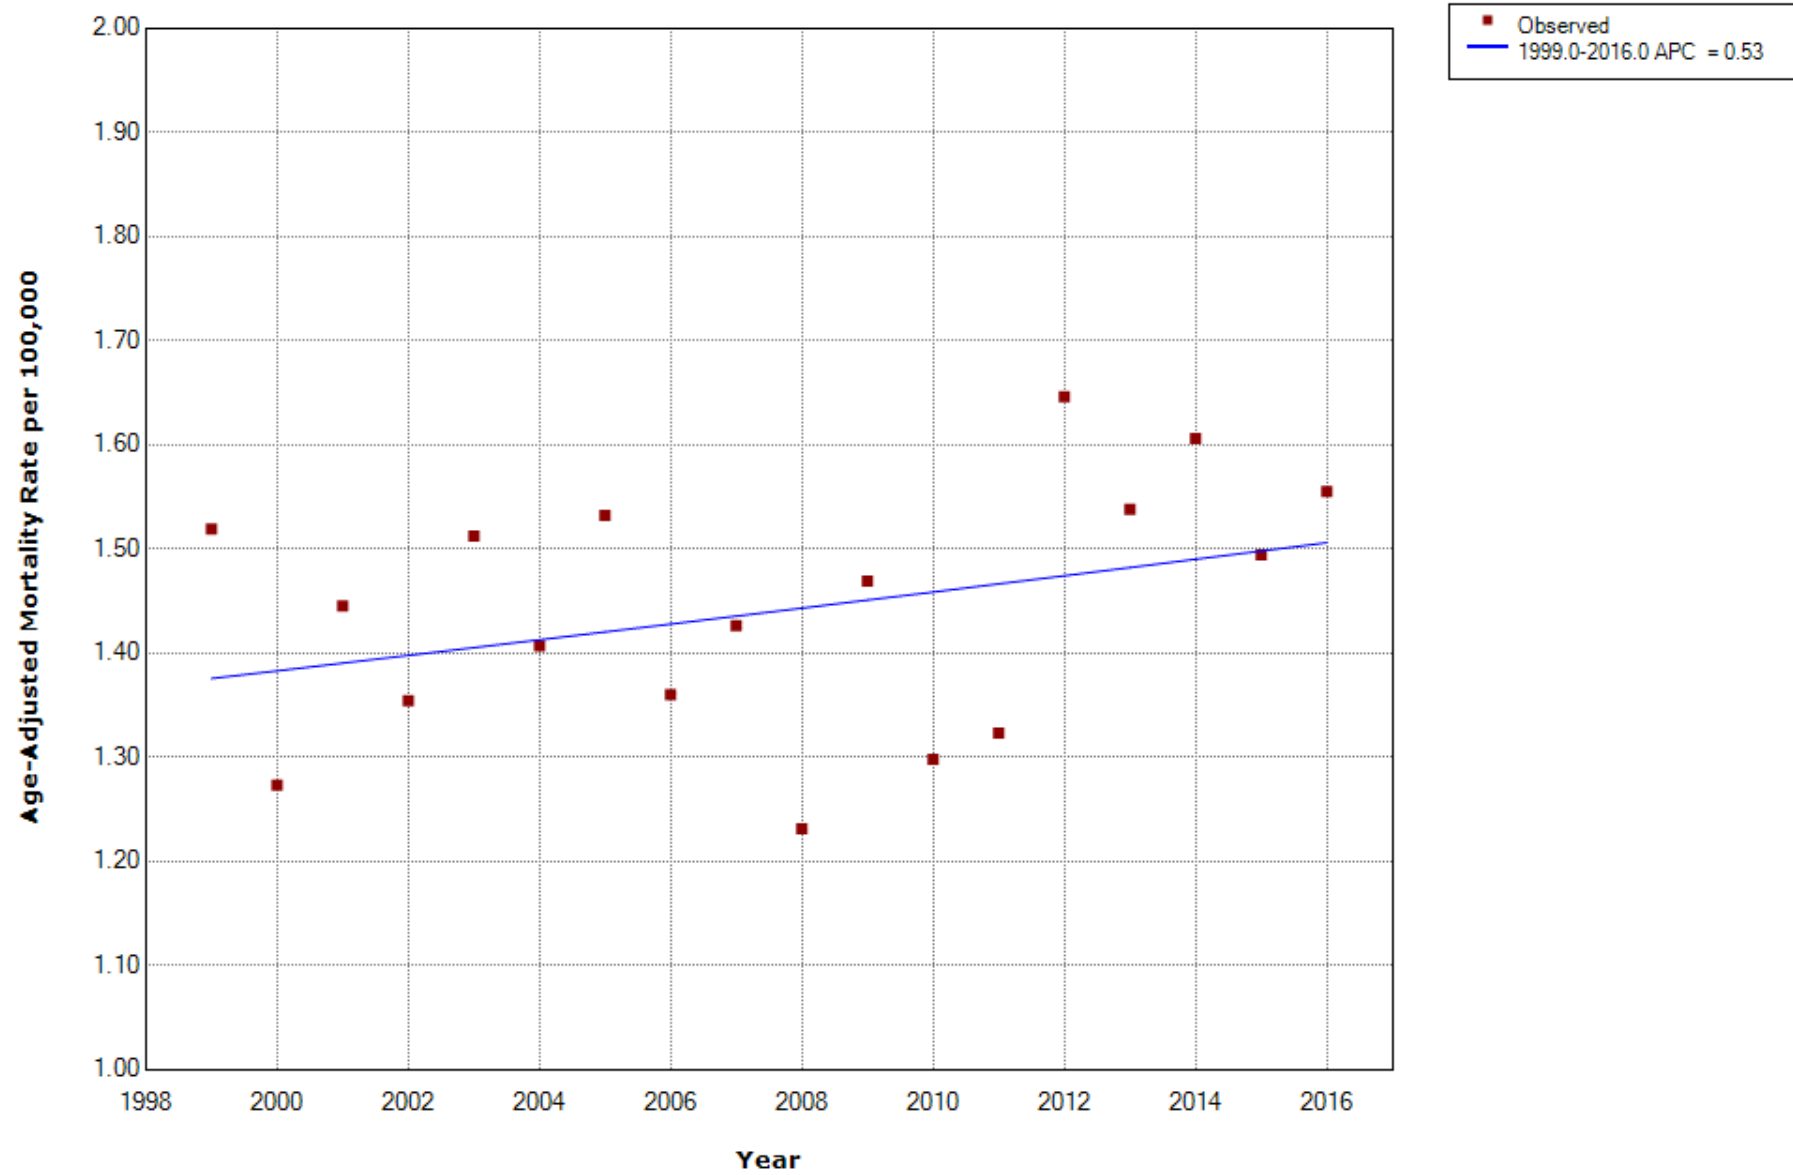

^ Indicates that the Annual Percent Change (APC) is significantly different from zero at the alpha = 0.05 level.  
Final Selected Model: 0 Joinpoints.

# Episodic and paroxysmal disorders, including epilepsy (G40-G47) / NH whites: 0 Joinpoints

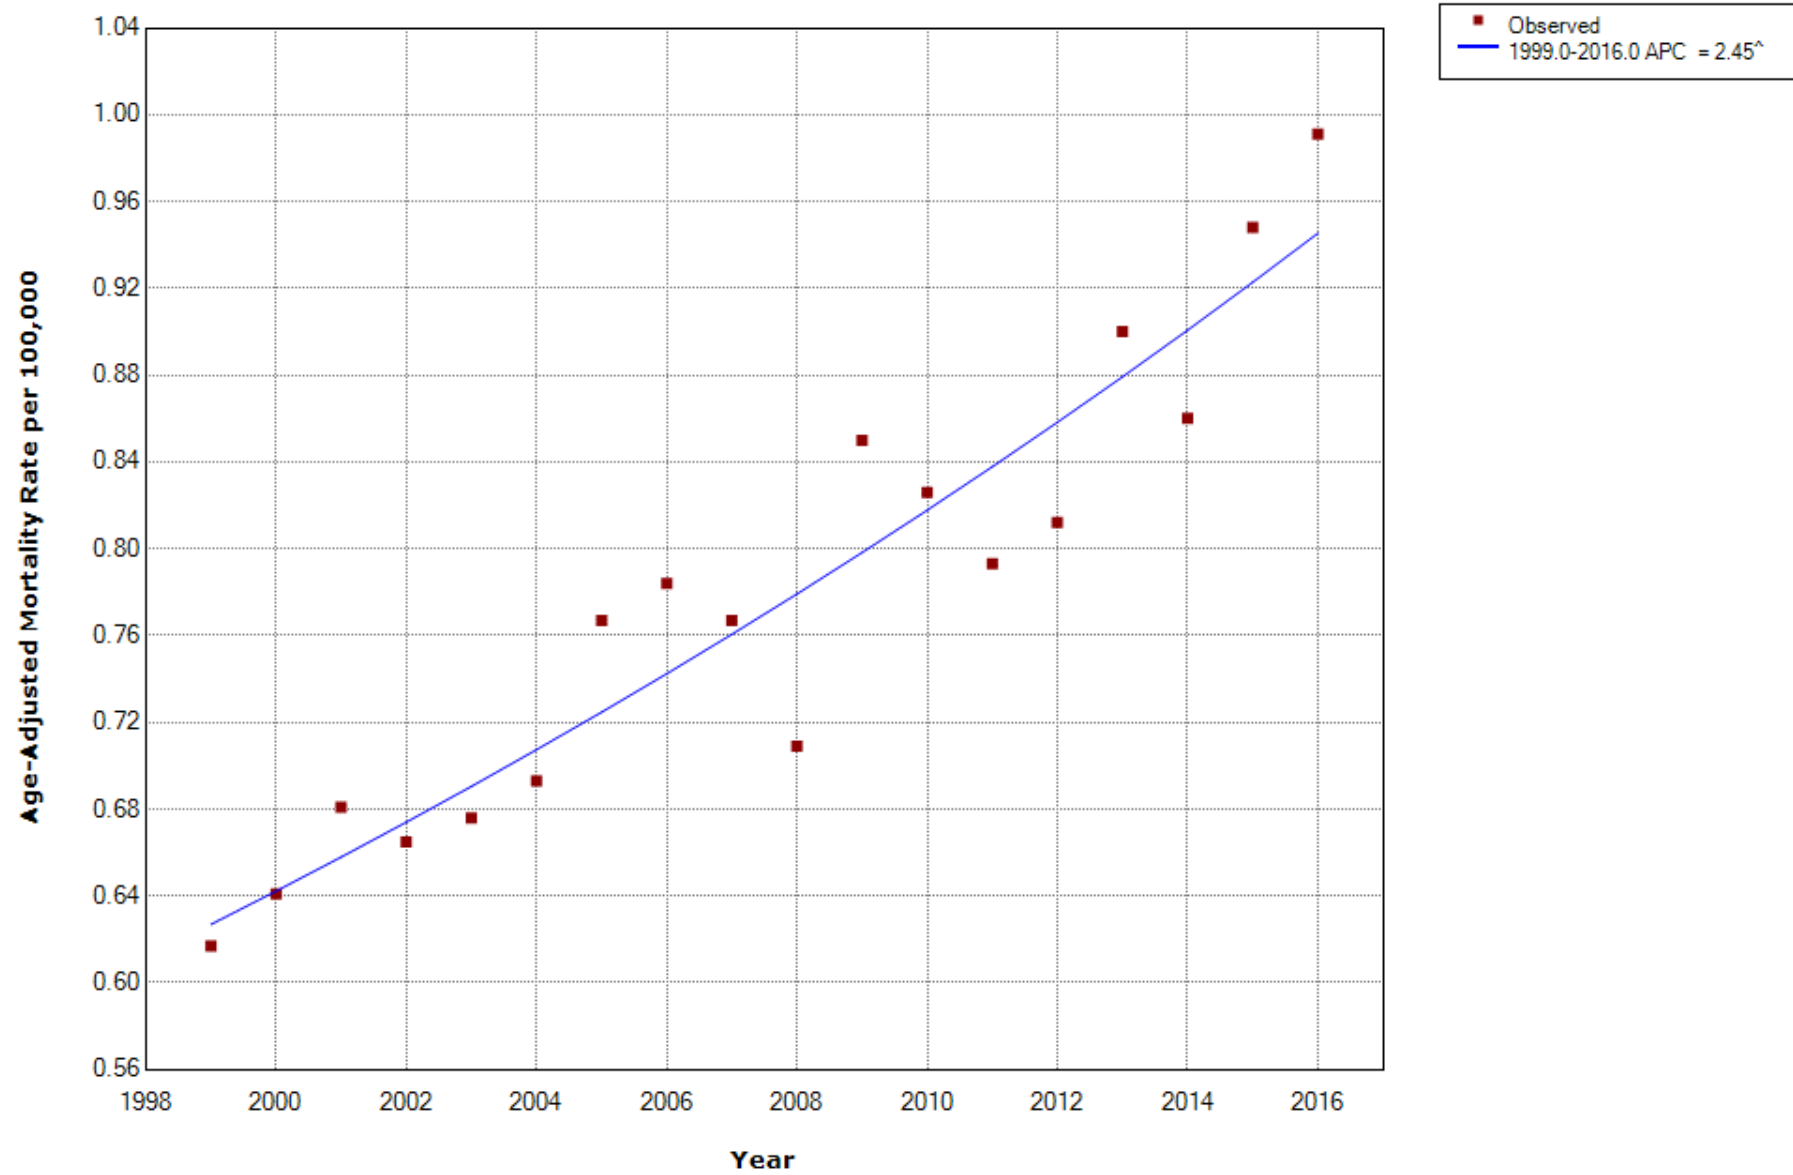

^ Indicates that the Annual Percent Change (APC) is significantly different from zero at the alpha = 0.05 level.  
Final Selected Model: 0 Joinpoints.

Episodic and paroxysmal disorders, including epilepsy (G40-G47) / Hispanics: 0 Joinpoints

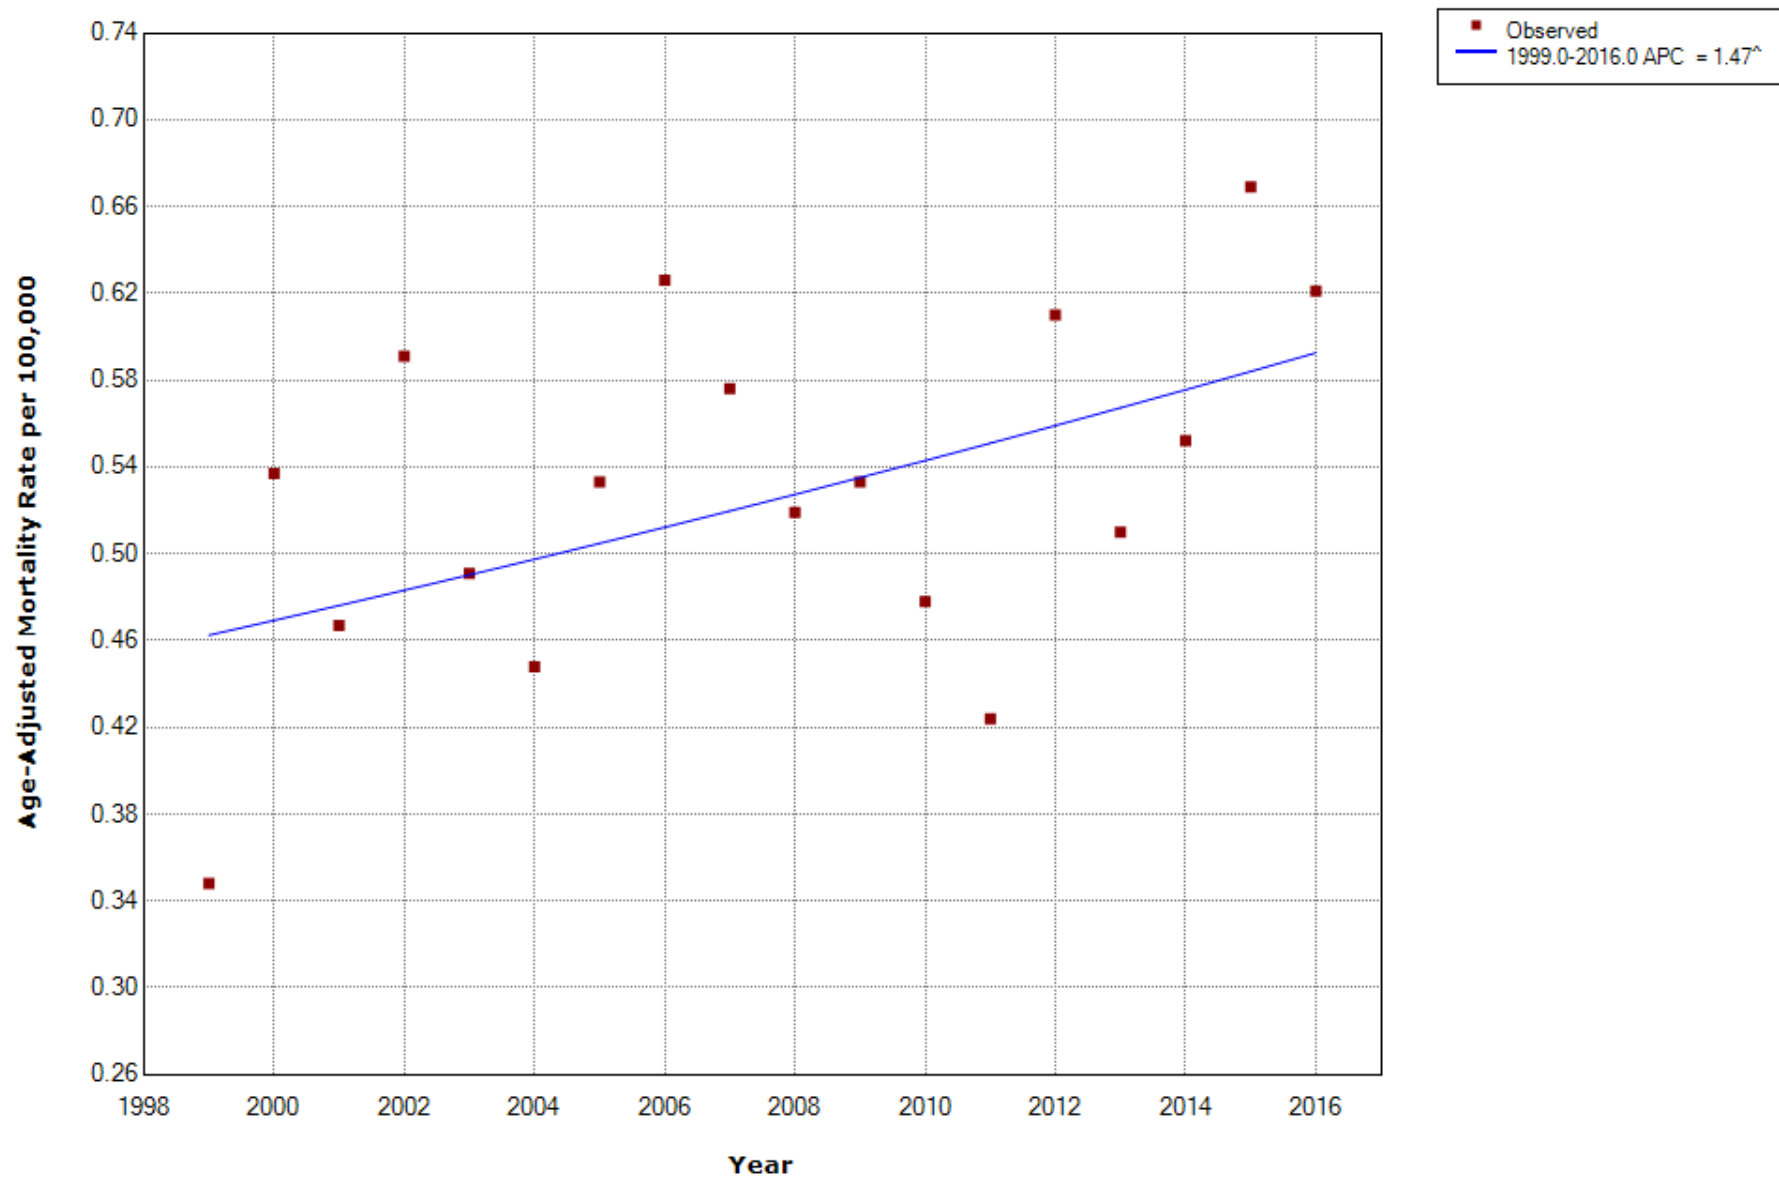

^ Indicates that the Annual Percent Change (APC) is significantly different from zero at the alpha = 0.05 level.  
Final Selected Model: 0 Joinpoints.

### Cerebral palsy and other paralytic syndromes (G80-G83) / NH AIAN: Observed

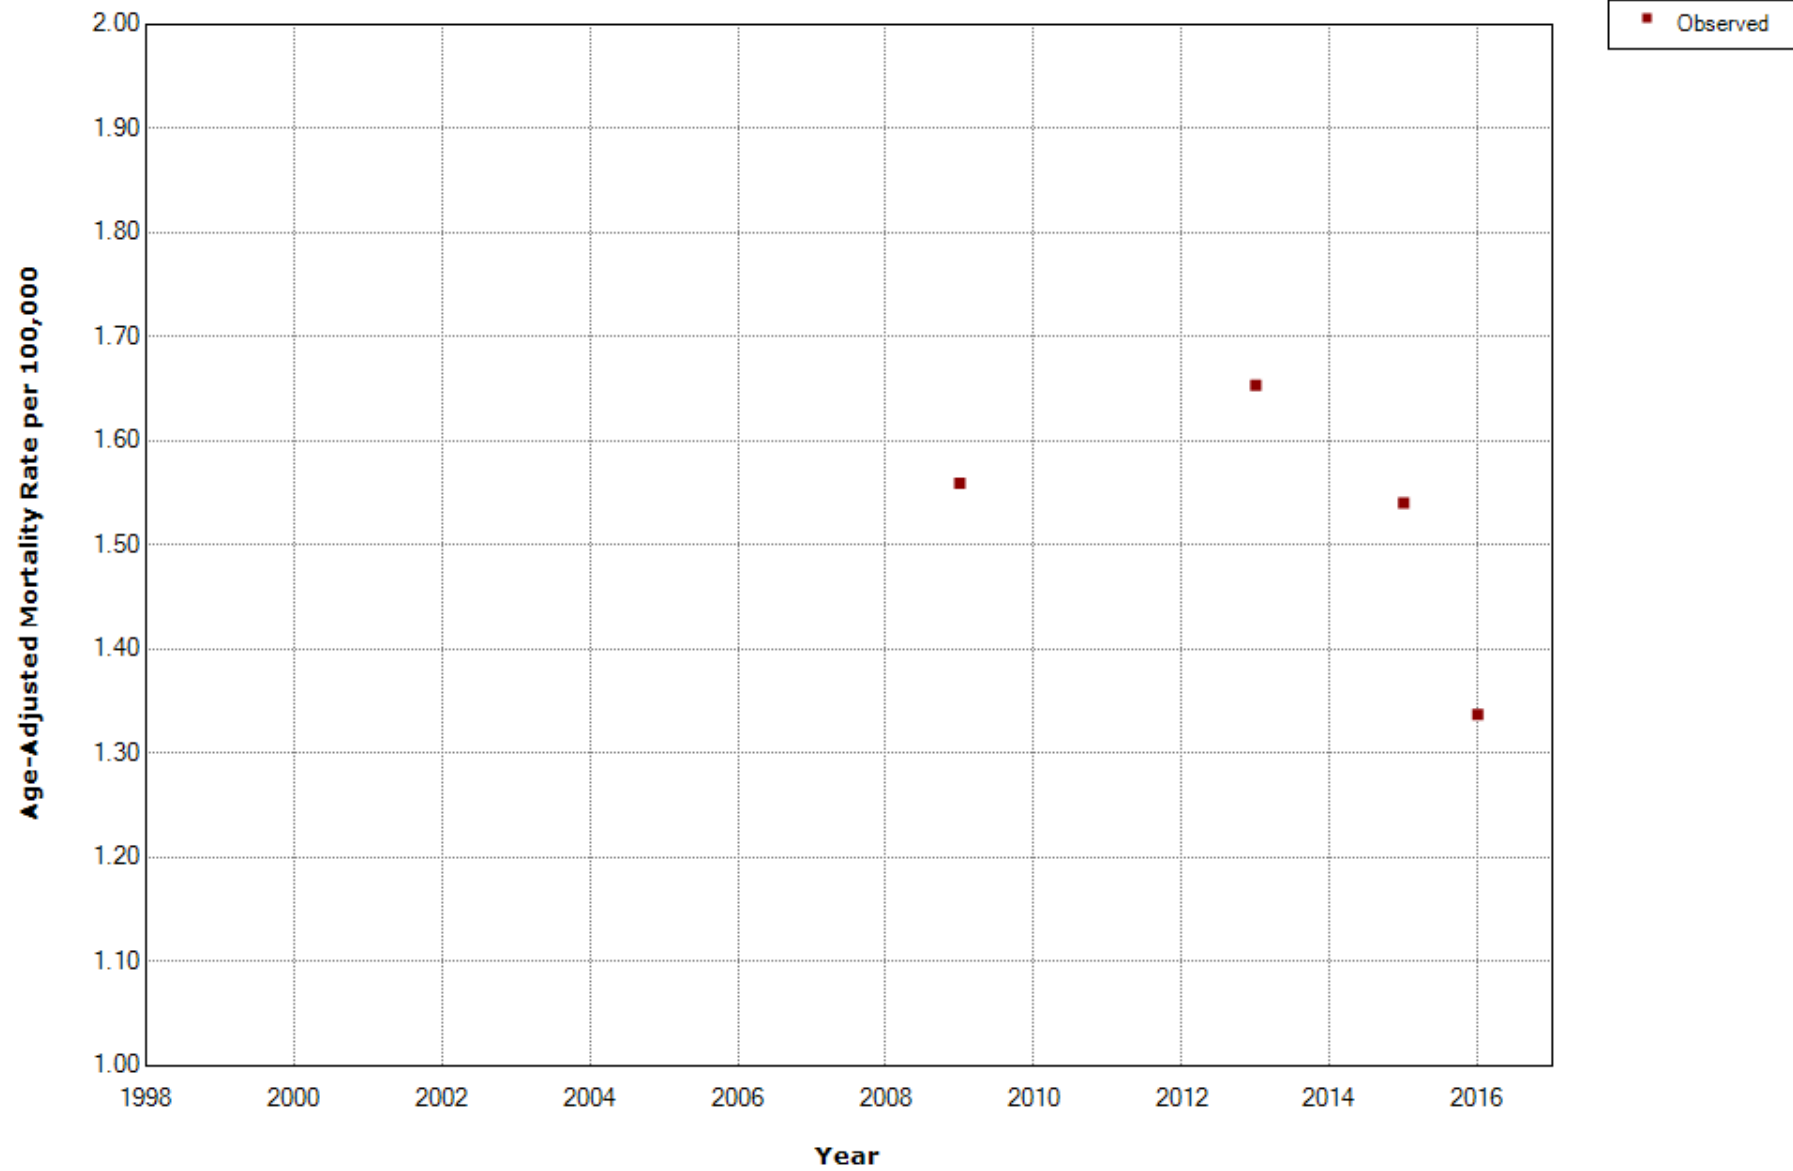

^ Indicates that the Annual Percent Change (APC) is significantly different from zero at the alpha = 0.05 level.

\* Joinpoint cannot process records with missing dependent variable values. Joinpoint will not analyze by-groups that have this error. (Row = 2160, Col = 1)



### Cerebral palsy and other paralytic syndromes (G80-G83) / NH API: Observed

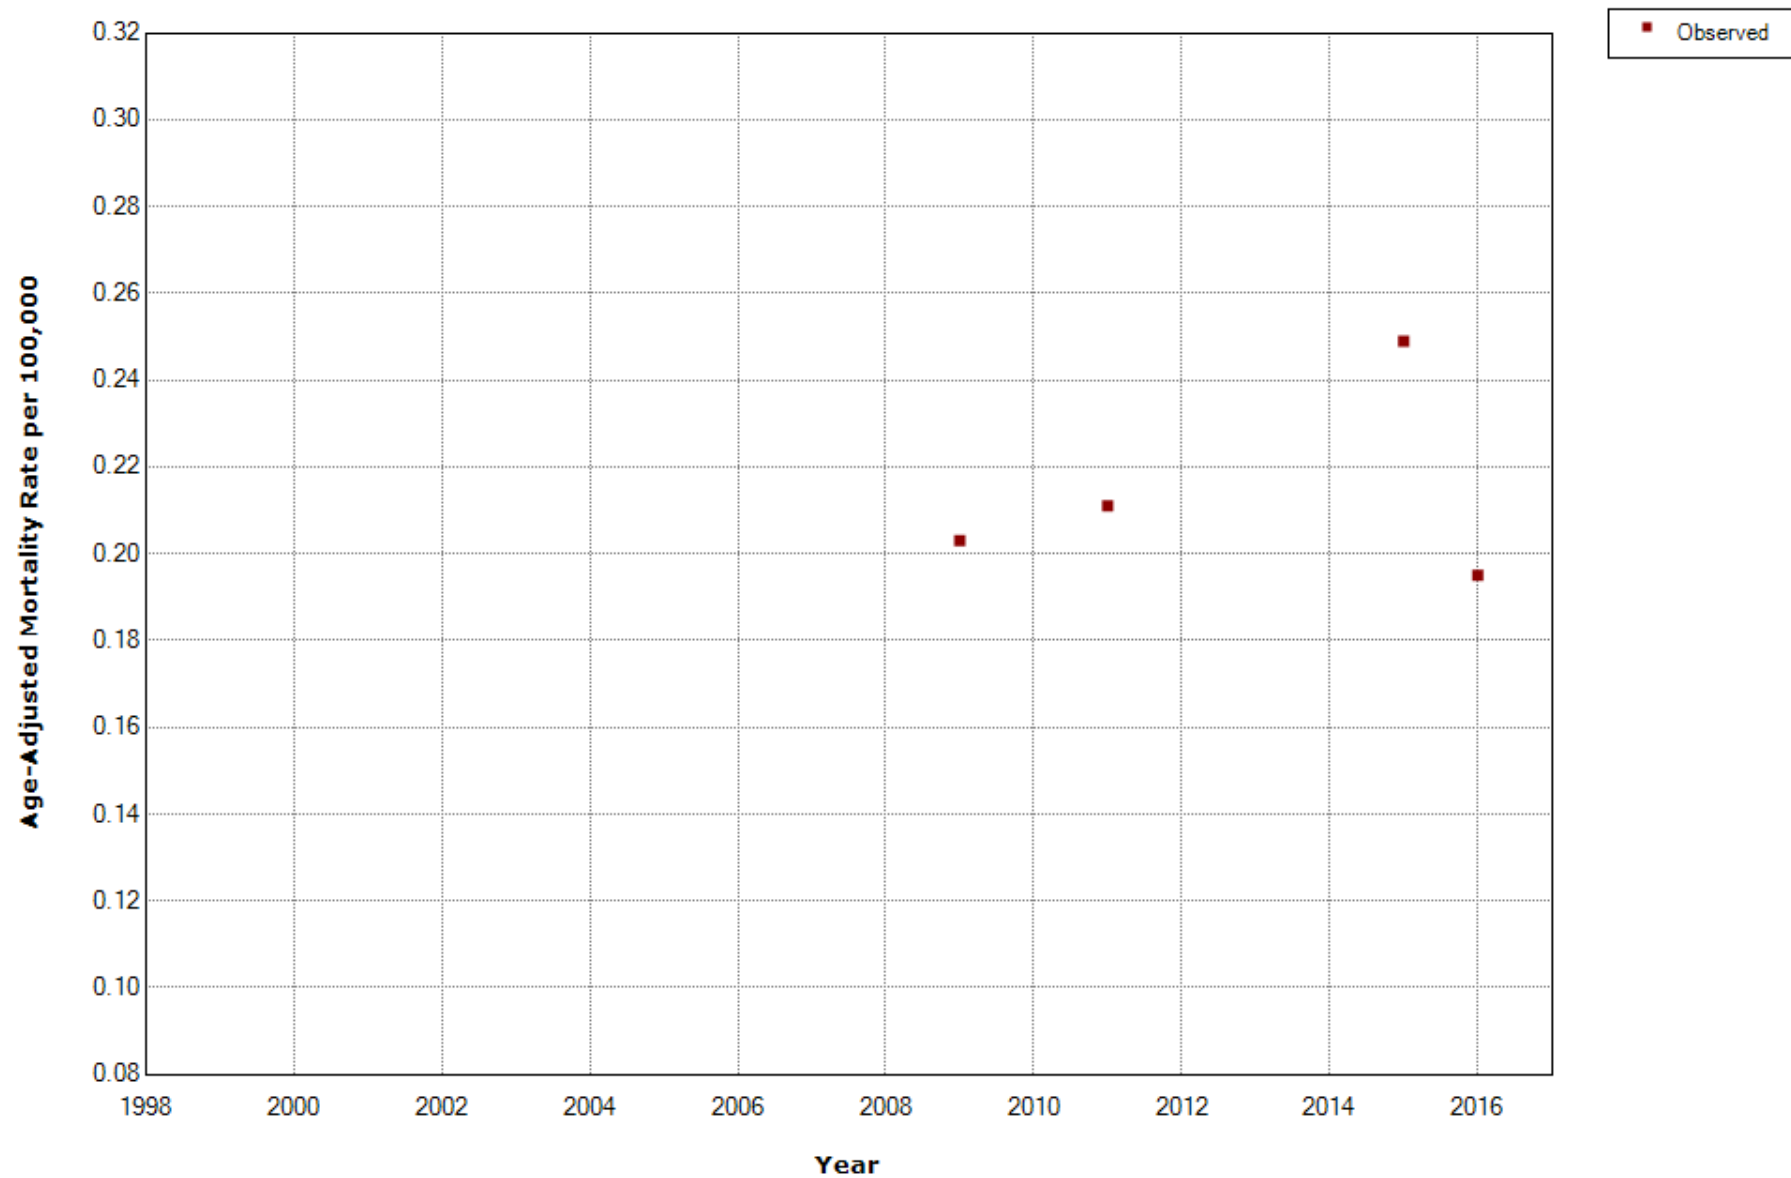

^ Indicates that the Annual Percent Change (APC) is significantly different from zero at the alpha = 0.05 level.

\* Joinpoint cannot process records with missing dependent variable values. Joinpoint will not analyze by-groups that have this error. (Row = 2178, Col = 1)

### Cerebral palsy and other paralytic syndromes (G80-G83) / NH Blacks: 1 Joinpoint

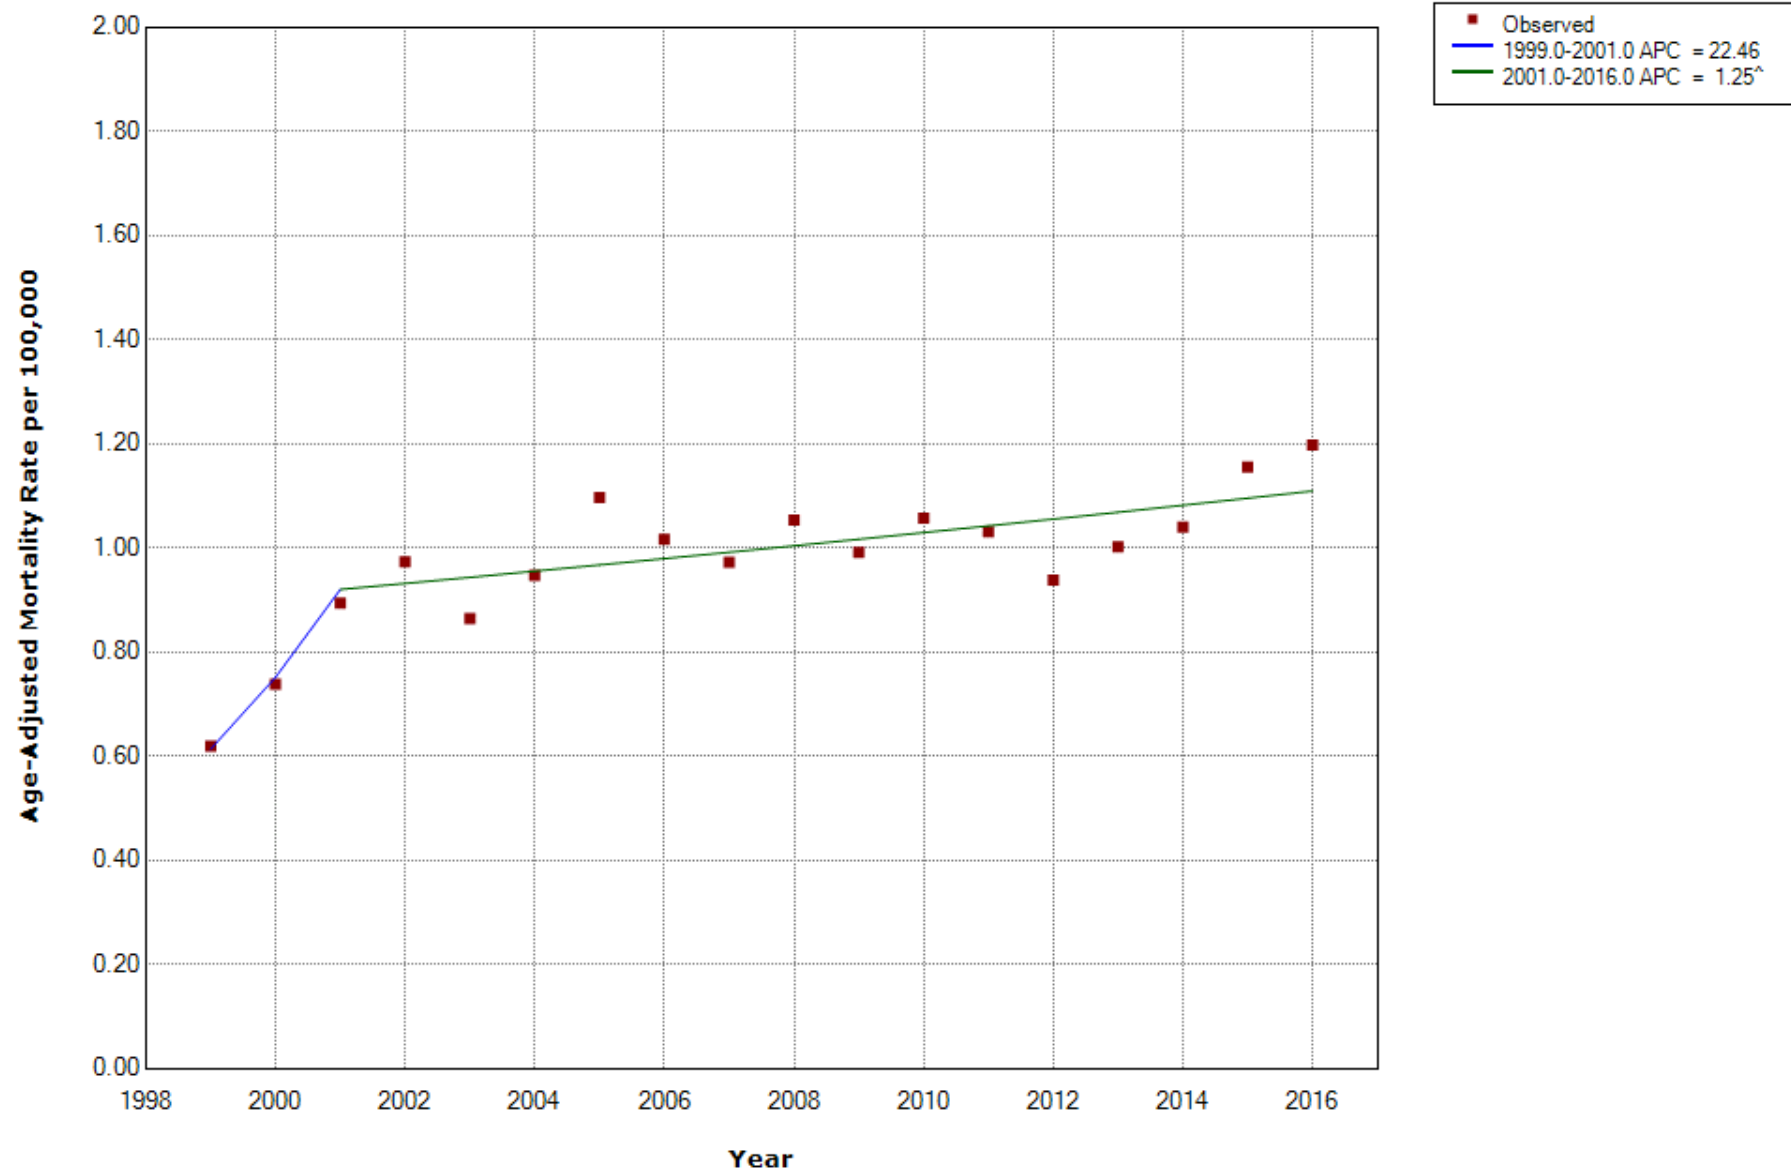

^ Indicates that the Annual Percent Change (APC) is significantly different from zero at the alpha = 0.05 level.  
Final Selected Model: 1 Joinpoint.

### Cerebral palsy and other paralytic syndromes (G80-G83) / NH whites: 1 Joinpoint

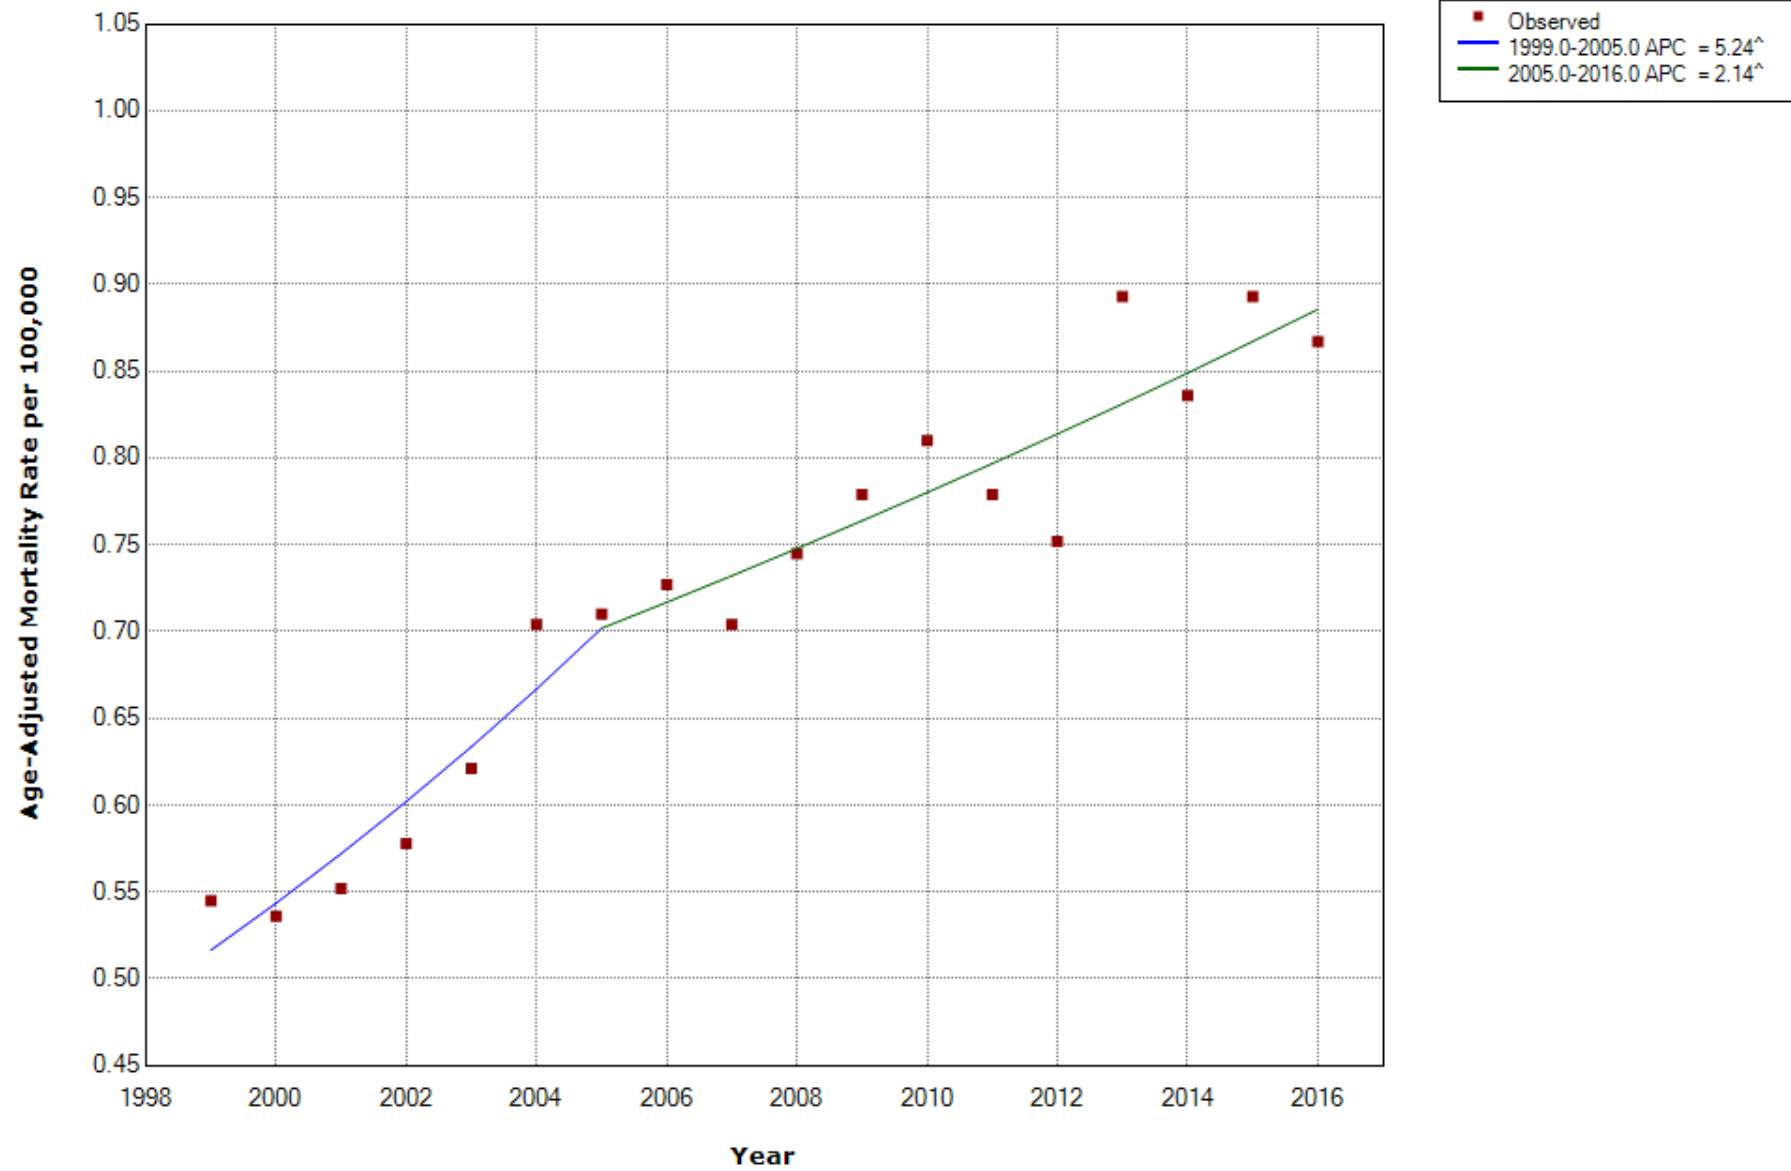

^ Indicates that the Annual Percent Change (APC) is significantly different from zero at the alpha = 0.05 level.  
Final Selected Model: 1 Joinpoint.

### Cerebral palsy and other paralytic syndromes (G80-G83) / Hispanics: 0 Joinpoints

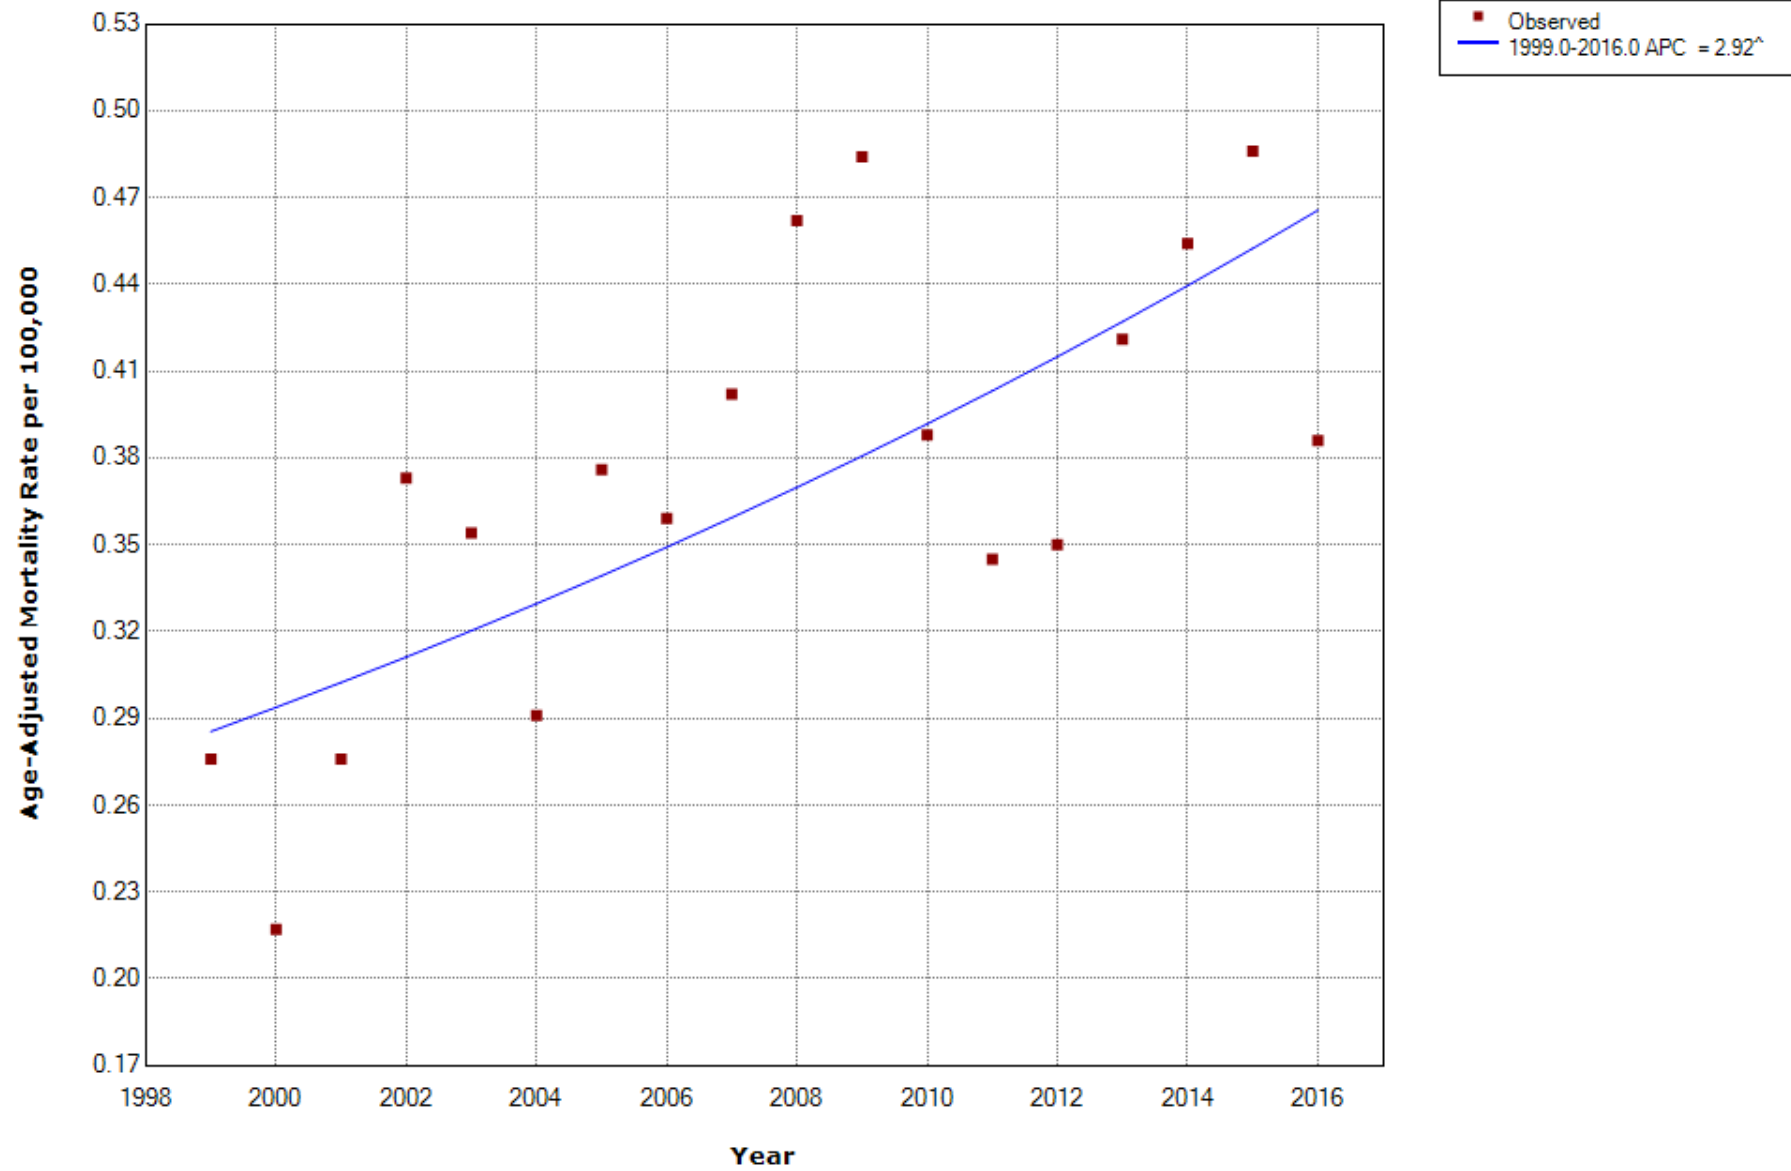

^ Indicates that the Annual Percent Change (APC) is significantly different from zero at the alpha = 0.05 level.  
Final Selected Model: 0 Joinpoints.

### Other disorders of the nervous system (G90-G98) / NH AIAN: Observed

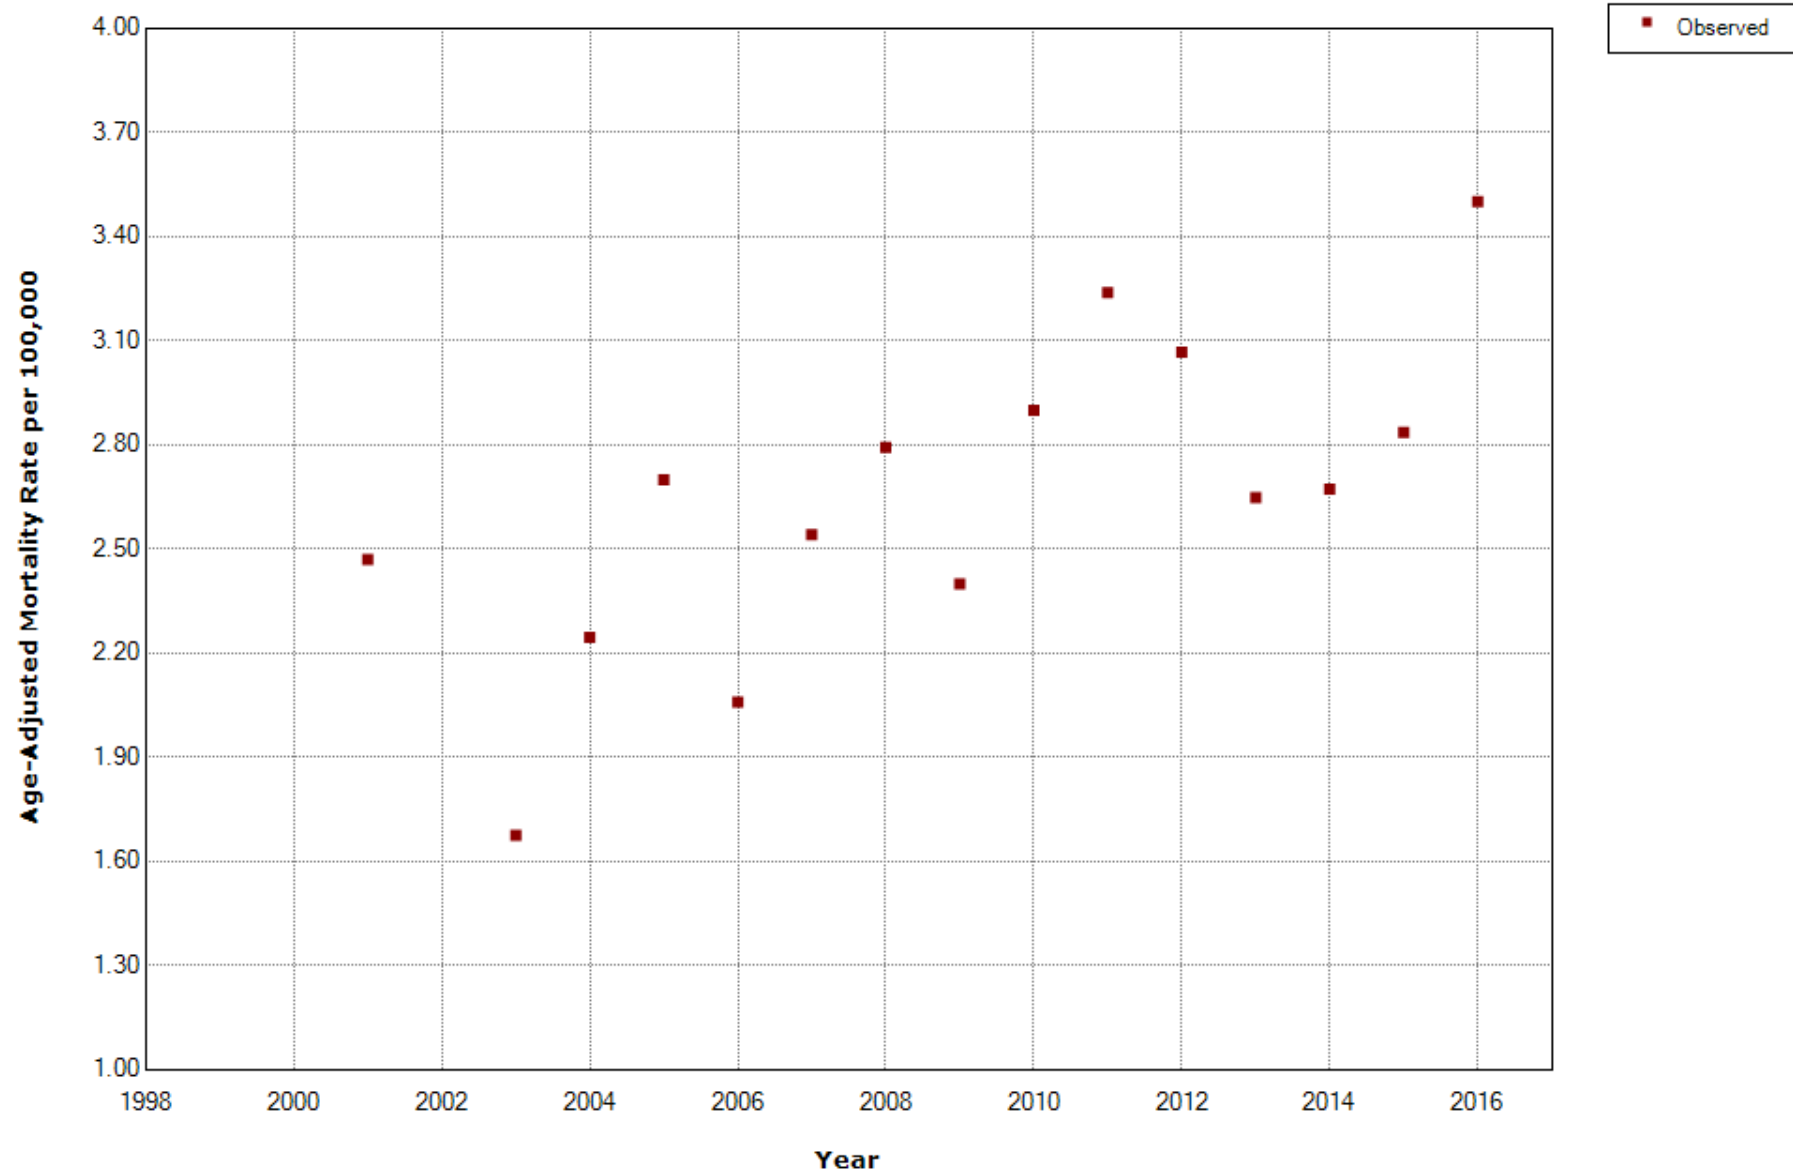

^ Indicates that the Annual Percent Change (APC) is significantly different from zero at the alpha = 0.05 level.

\* Joinpoint cannot process records with missing dependent variable values. Joinpoint will not analyze by-groups that have this error. (Row = 2250, Col = 1)

Other disorders of the nervous system (G90-G98) / NH API: 0 Joinpoints

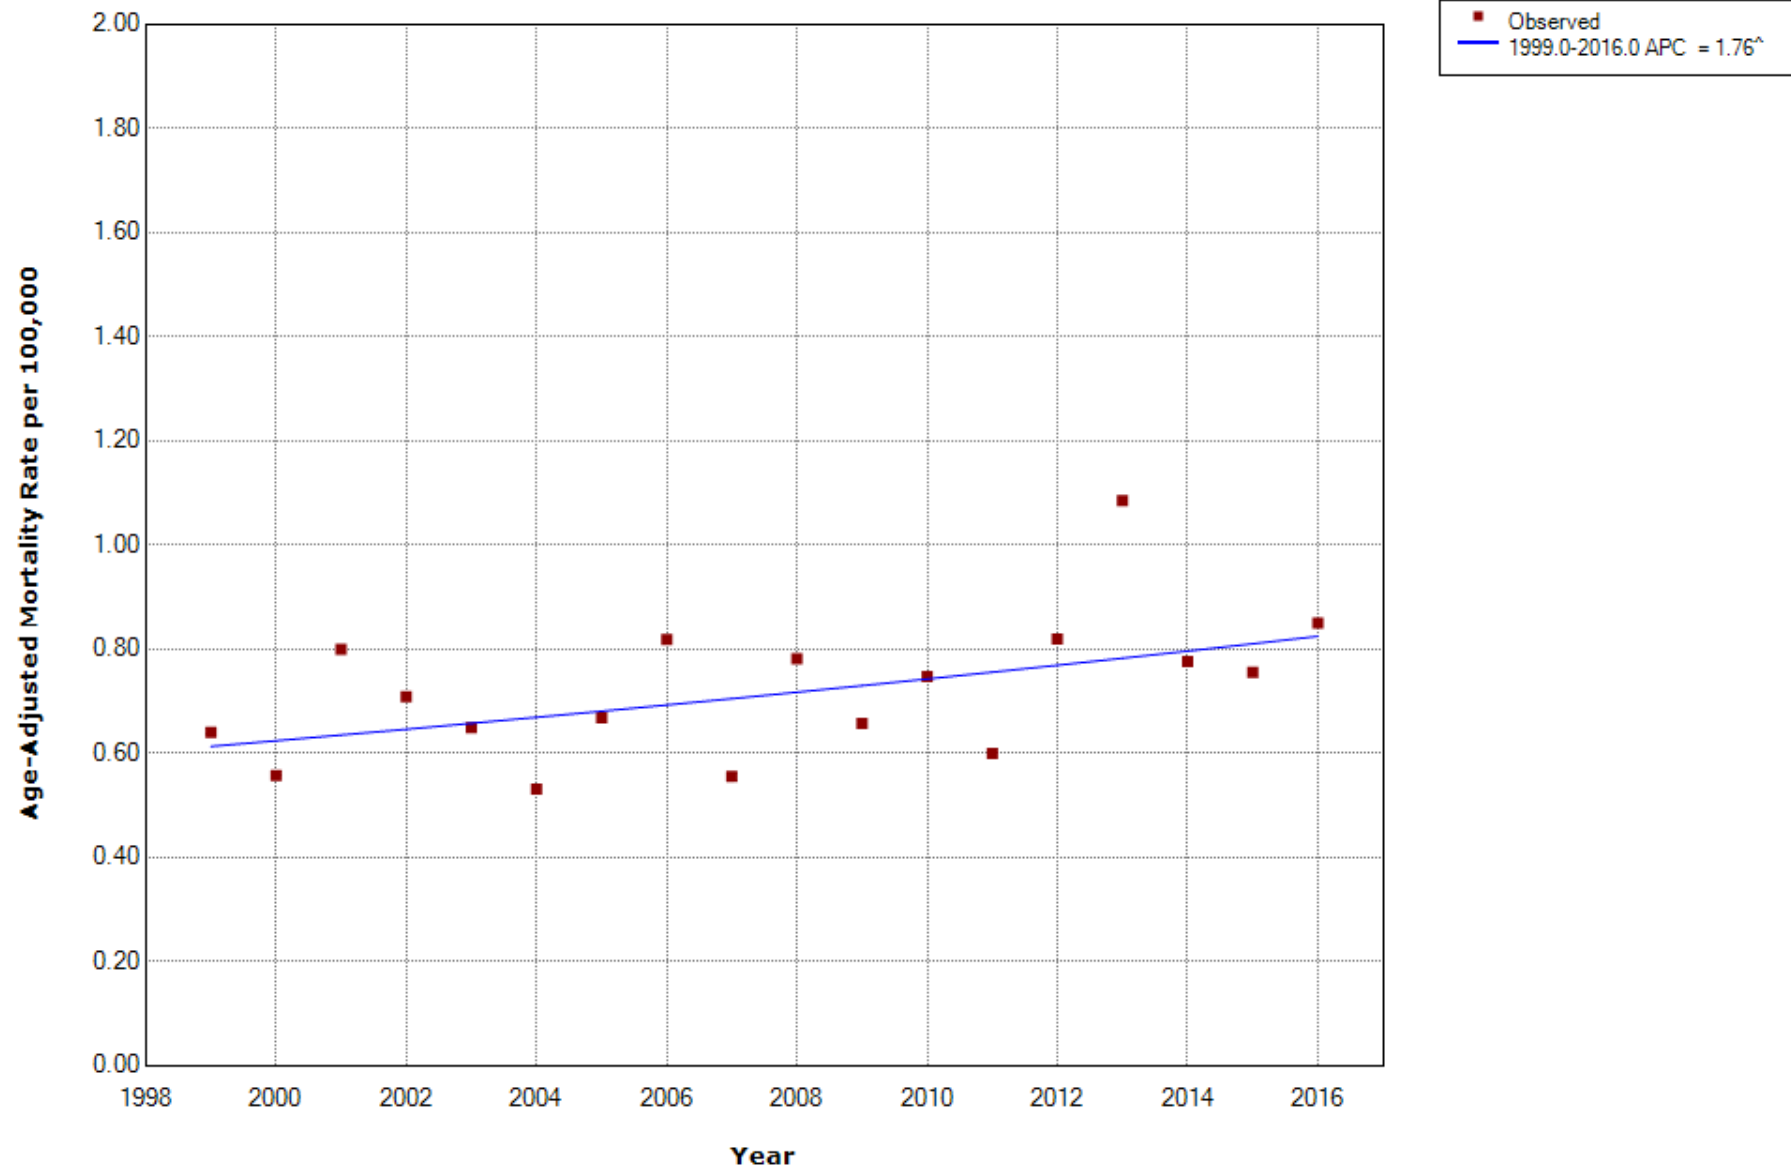

^ Indicates that the Annual Percent Change (APC) is significantly different from zero at the alpha = 0.05 level.  
Final Selected Model: 0 Joinpoints.

Other disorders of the nervous system (G90-G98) / NH Blacks: 0 Joinpoints

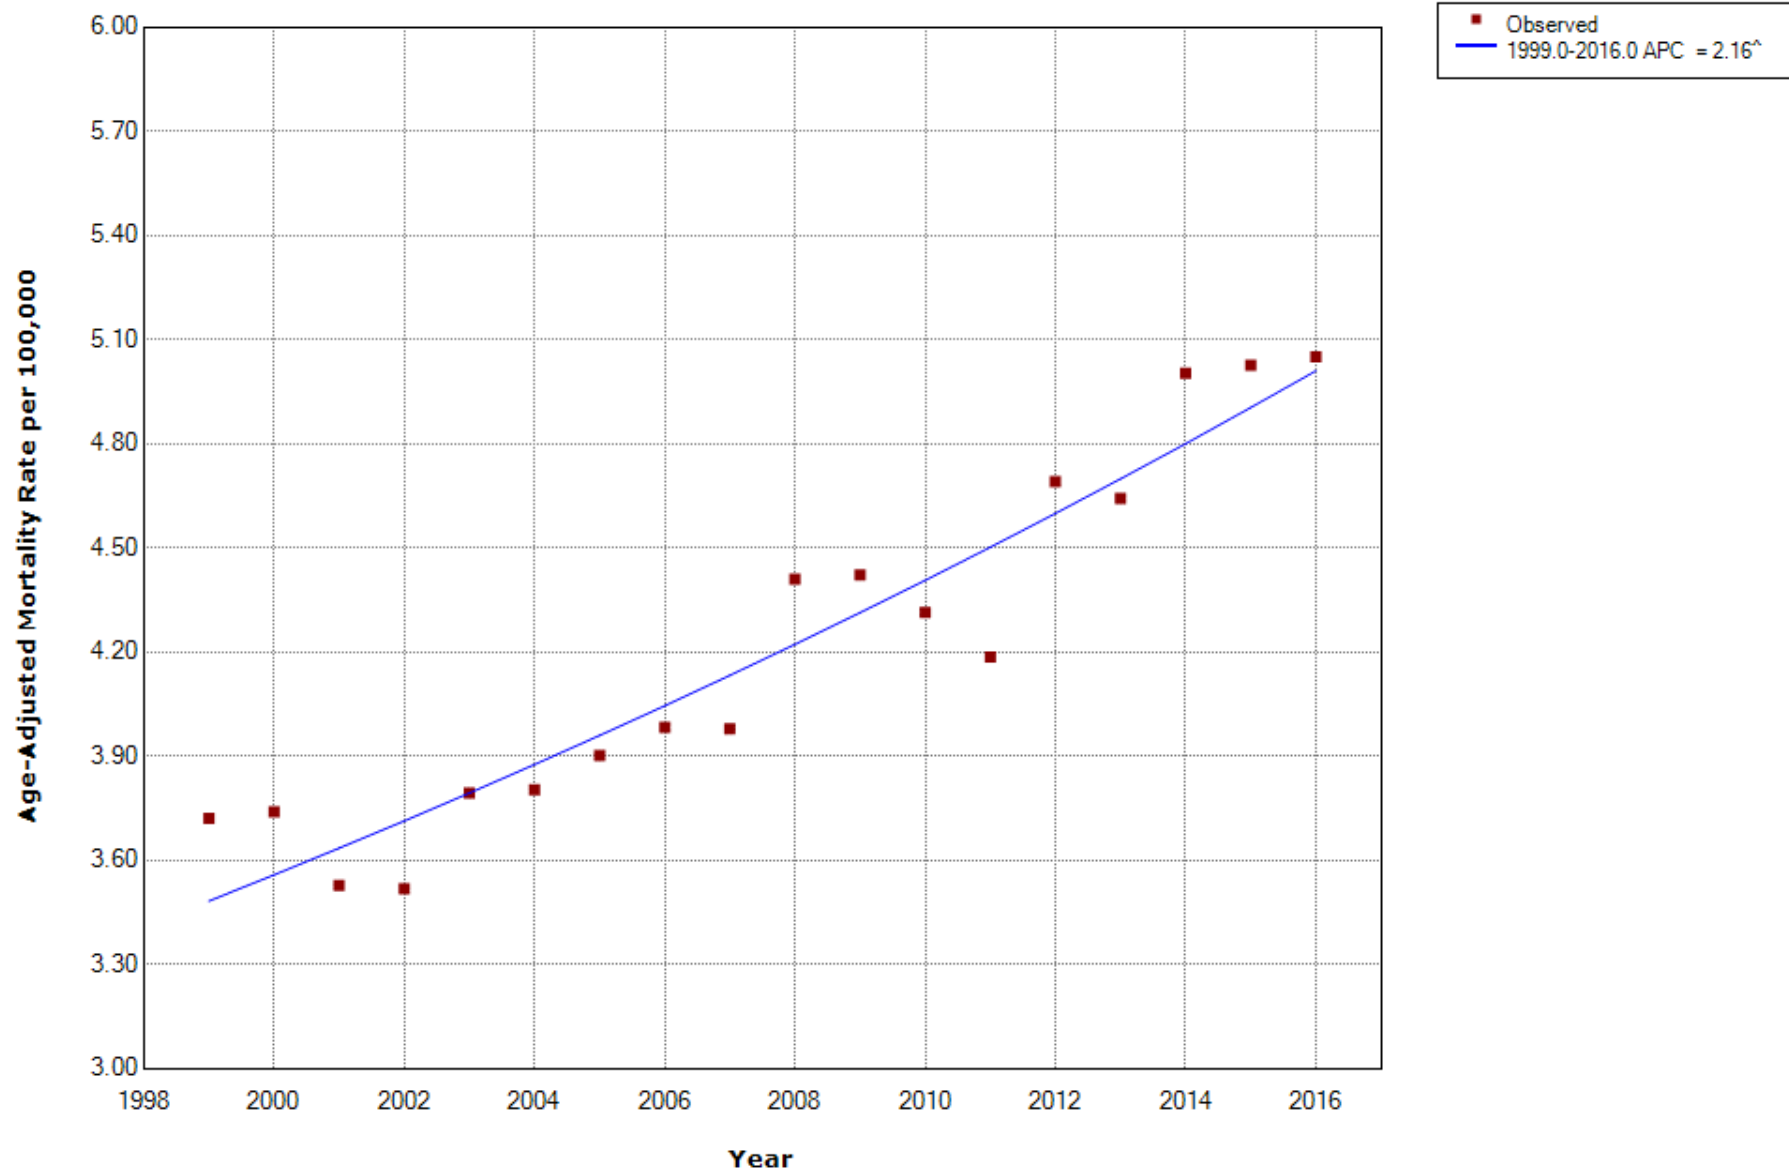

^ Indicates that the Annual Percent Change (APC) is significantly different from zero at the alpha = 0.05 level.  
Final Selected Model: 0 Joinpoints.

Other disorders of the nervous system (G90-G98) / NH whites: 2 Joinpoints

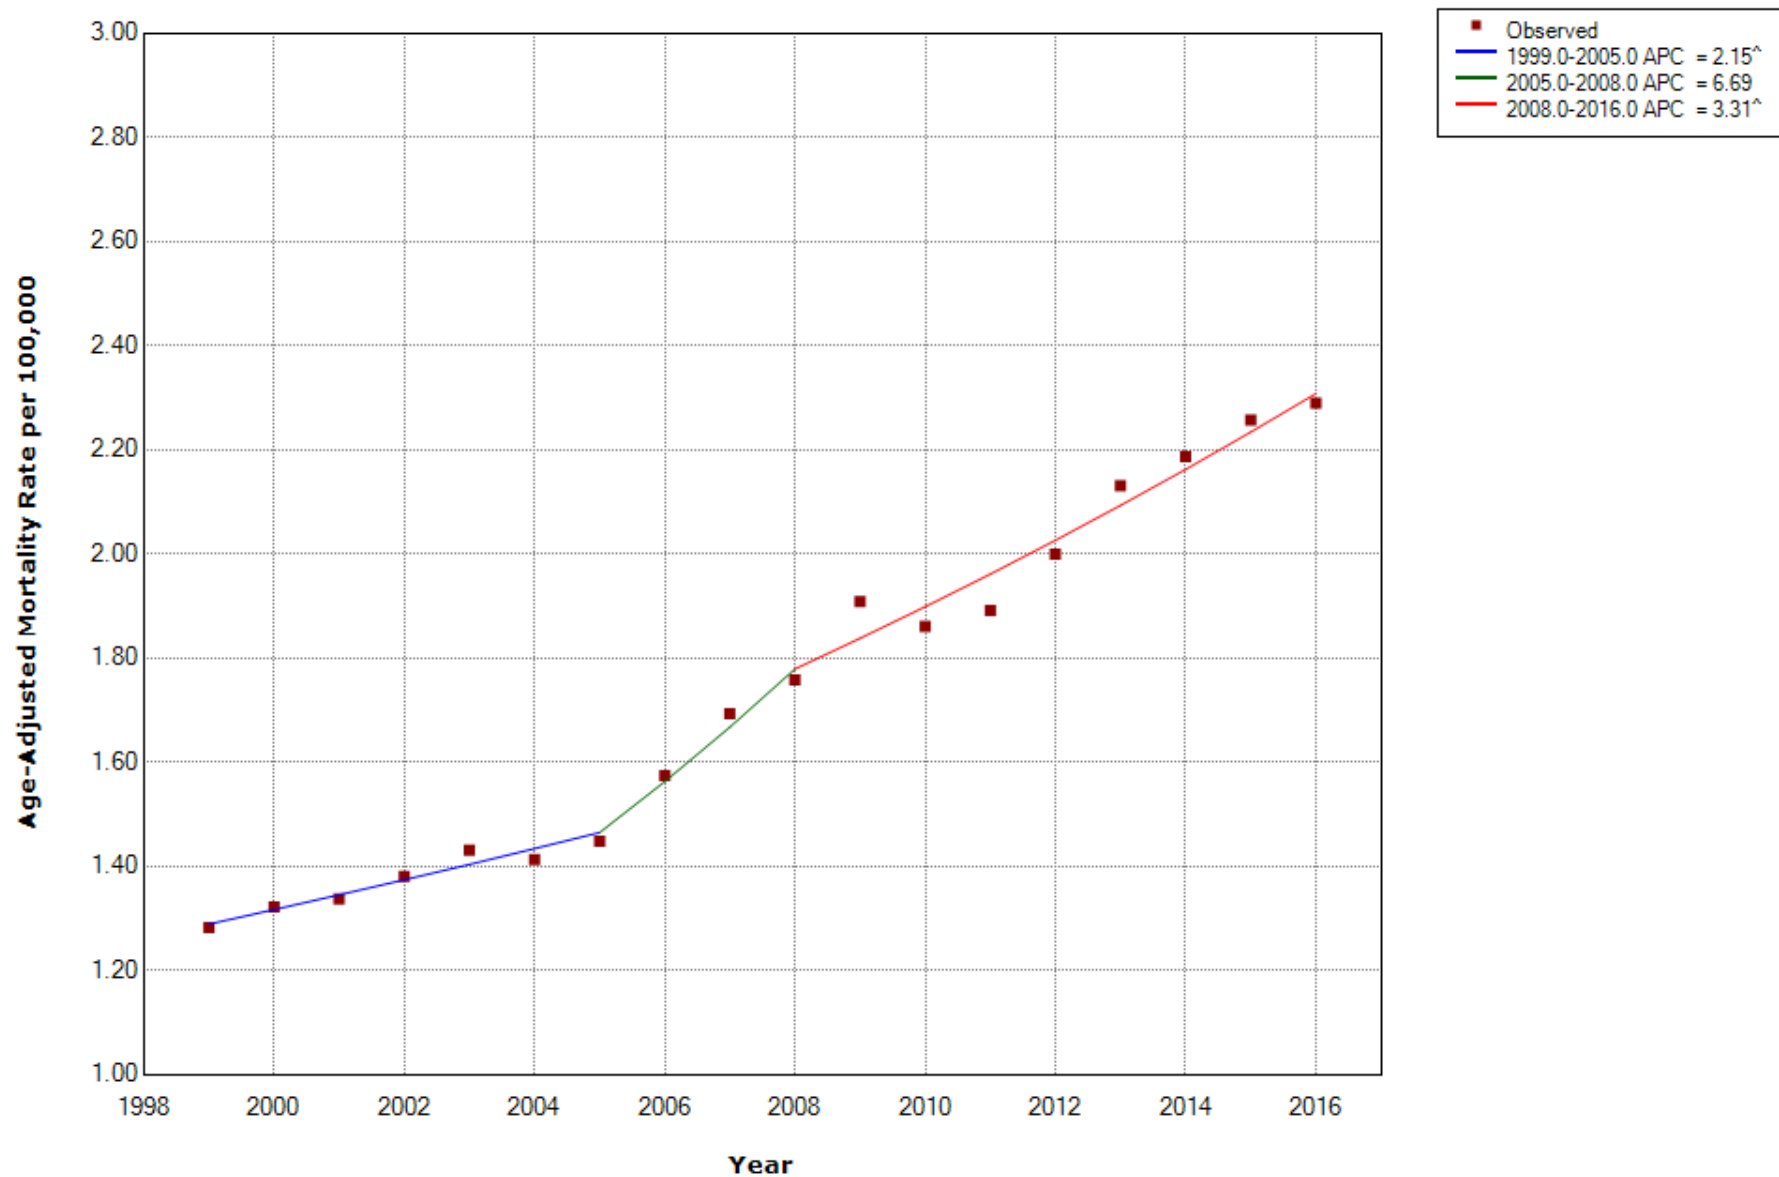

^ Indicates that the Annual Percent Change (APC) is significantly different from zero at the alpha = 0.05 level.  
Final Selected Model: 2 Joinpoints.



Other disorders of the nervous system (G90-G98) / Hispanics: 0 Joinpoints

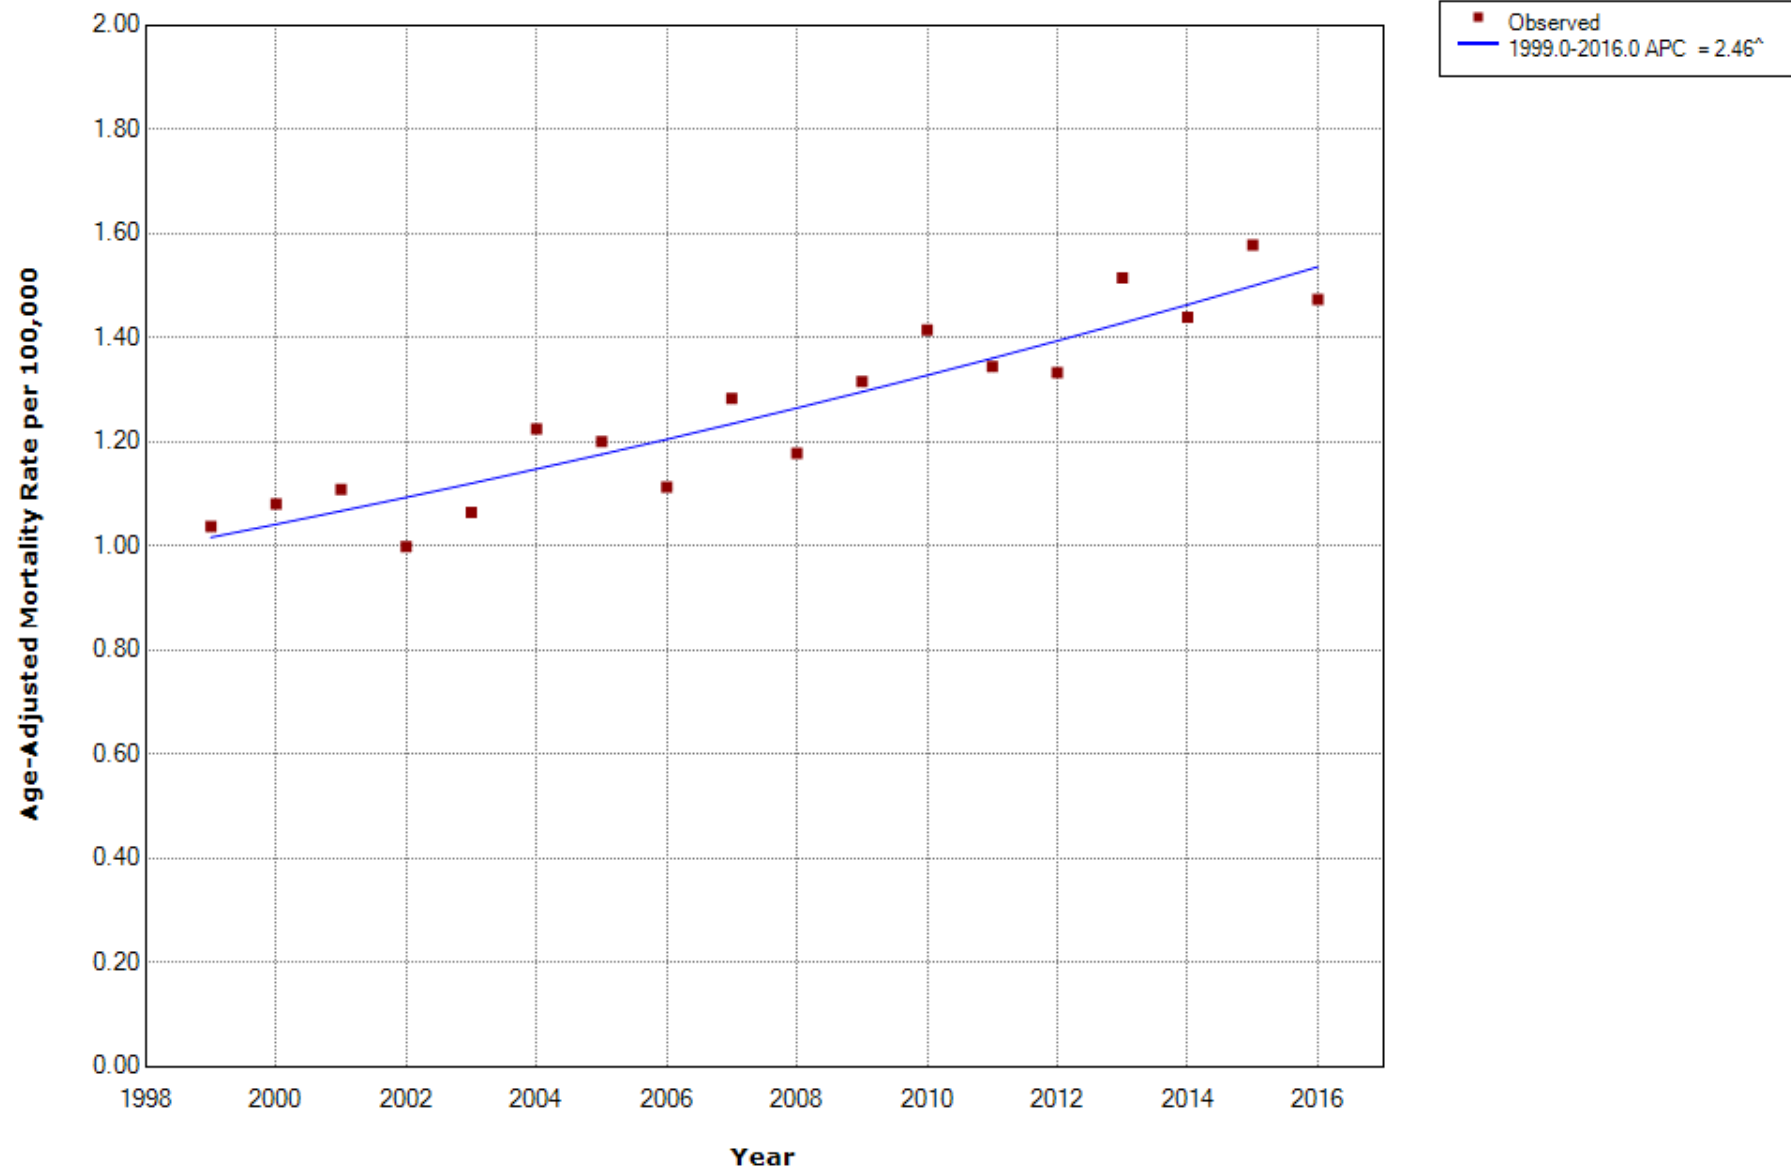

^ Indicates that the Annual Percent Change (APC) is significantly different from zero at the alpha = 0.05 level.  
Final Selected Model: 0 Joinpoints.

Alzheimer's/degenerative disorders (G30-G31) / NH whites: 0 Joinpoints

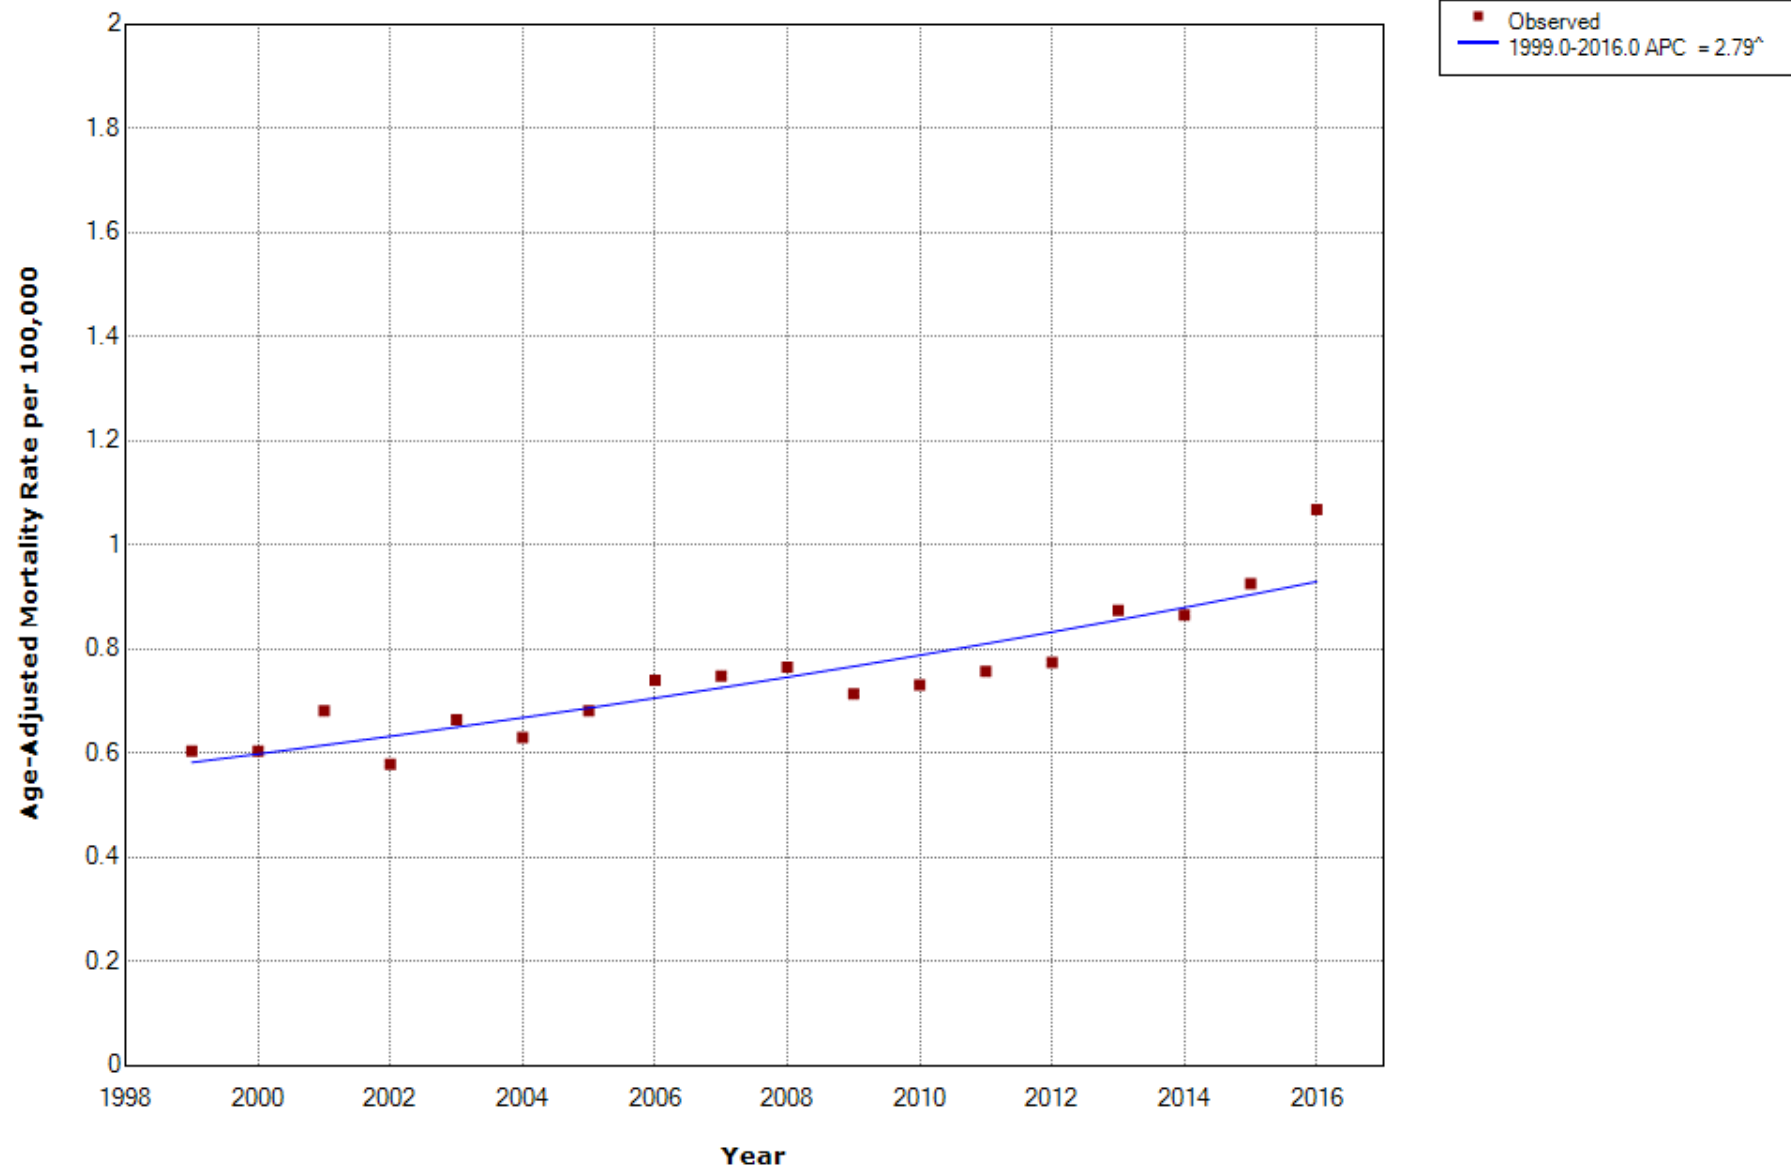

^ Indicates that the Annual Percent Change (APC) is significantly different from zero at the alpha = 0.05 level.  
Final Selected Model: 0 Joinpoints.

Alzheimer's/degenerative disorders (G30-G31) / NH Blacks: 0 Joinpoints

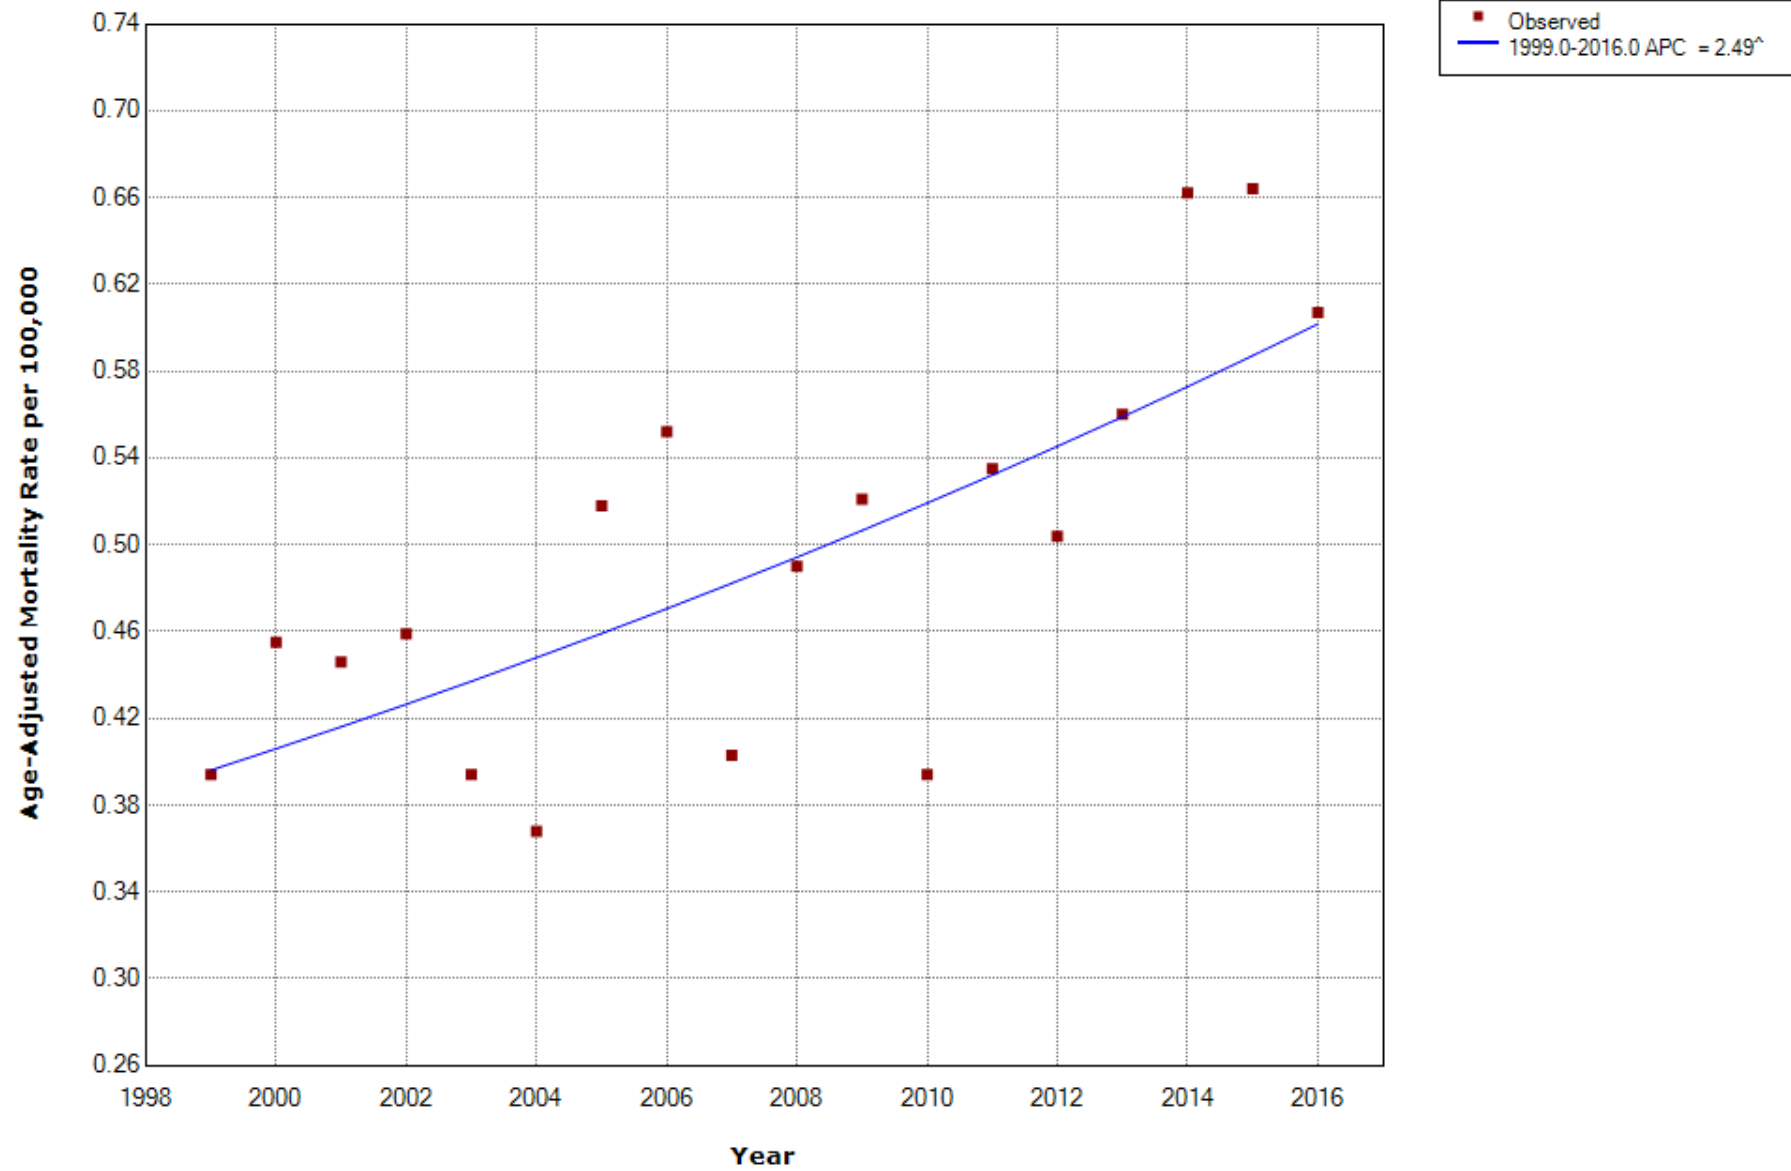

^ Indicates that the Annual Percent Change (APC) is significantly different from zero at the alpha = 0.05 level.  
Final Selected Model: 0 Joinpoints.

Alzheimer's/degenerative disorders (G30-G31) / Hispanics: 0 Joinpoints

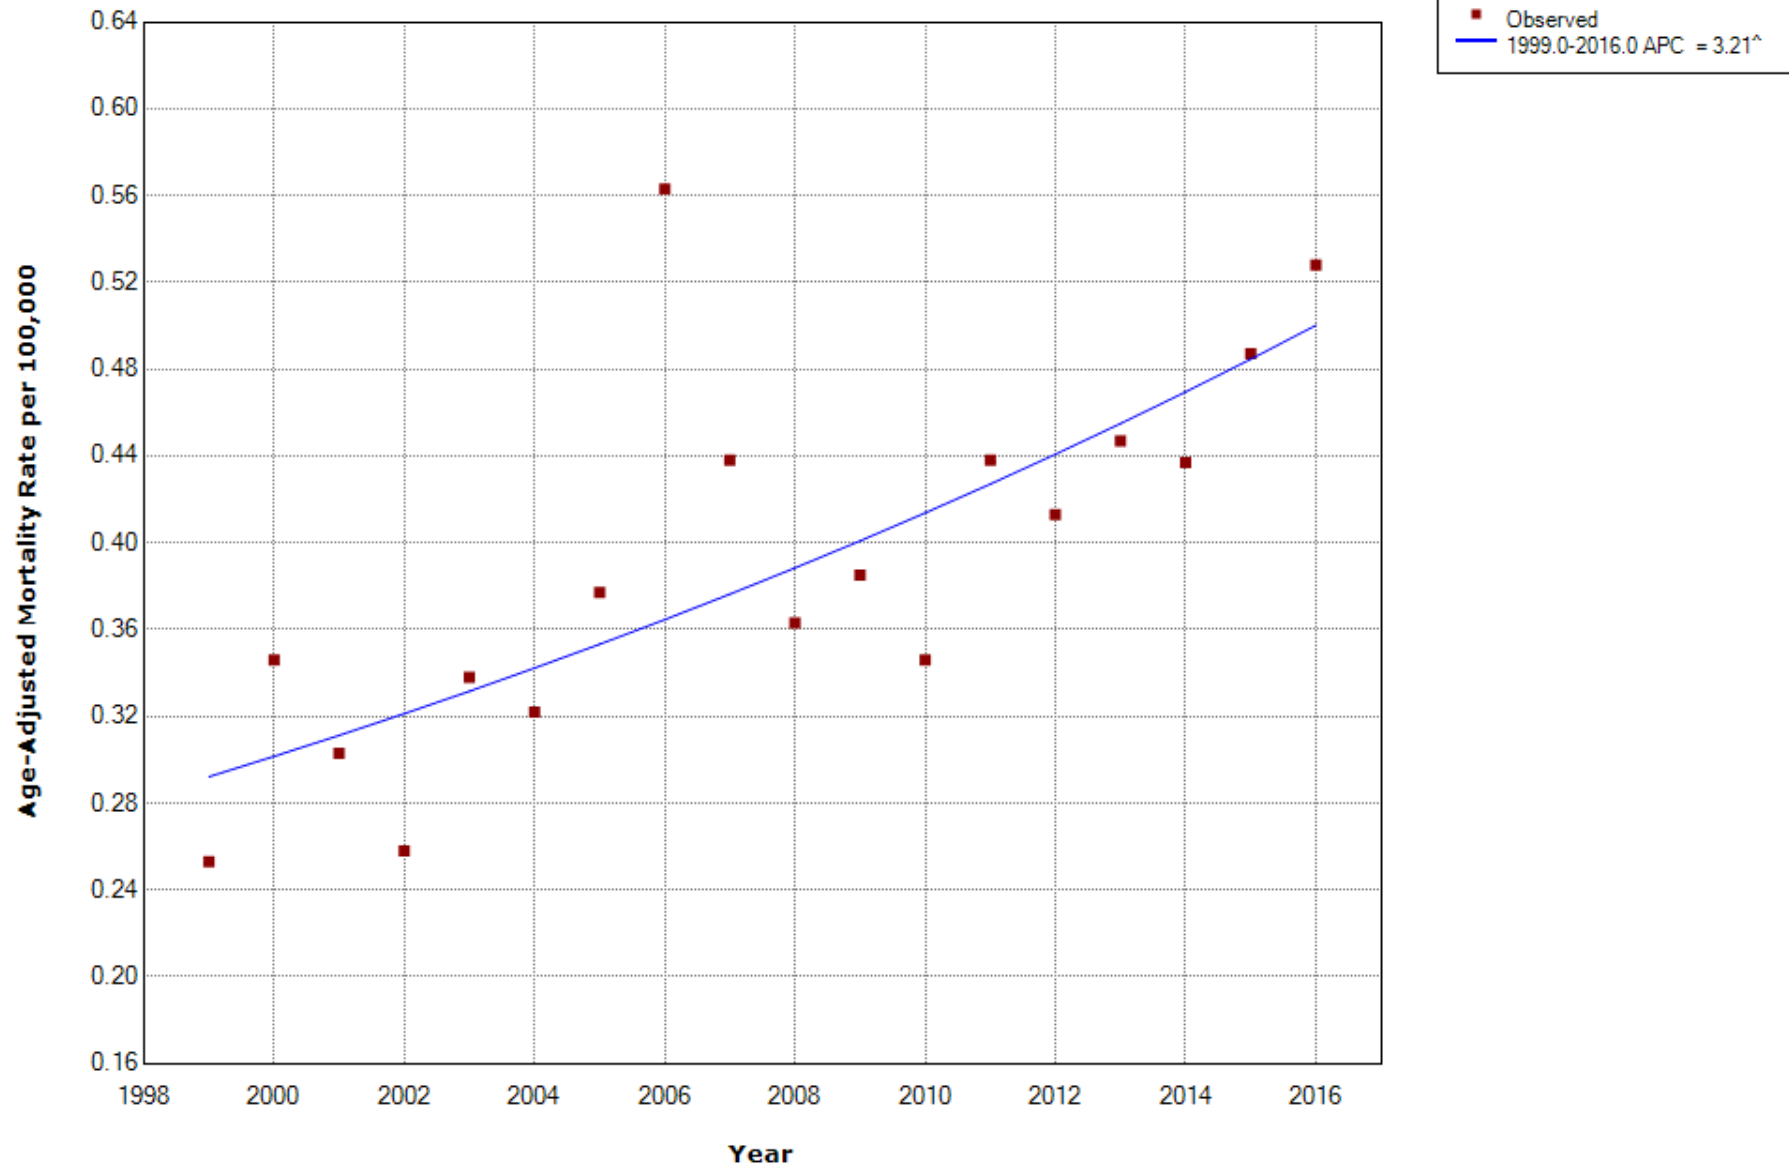

^ Indicates that the Annual Percent Change (APC) is significantly different from zero at the alpha = 0.05 level.  
Final Selected Model: 0 Joinpoints.

### Cancer of lip/oral cavity/pharynx (C00-C14) / NH whites: 1 Joinpoint

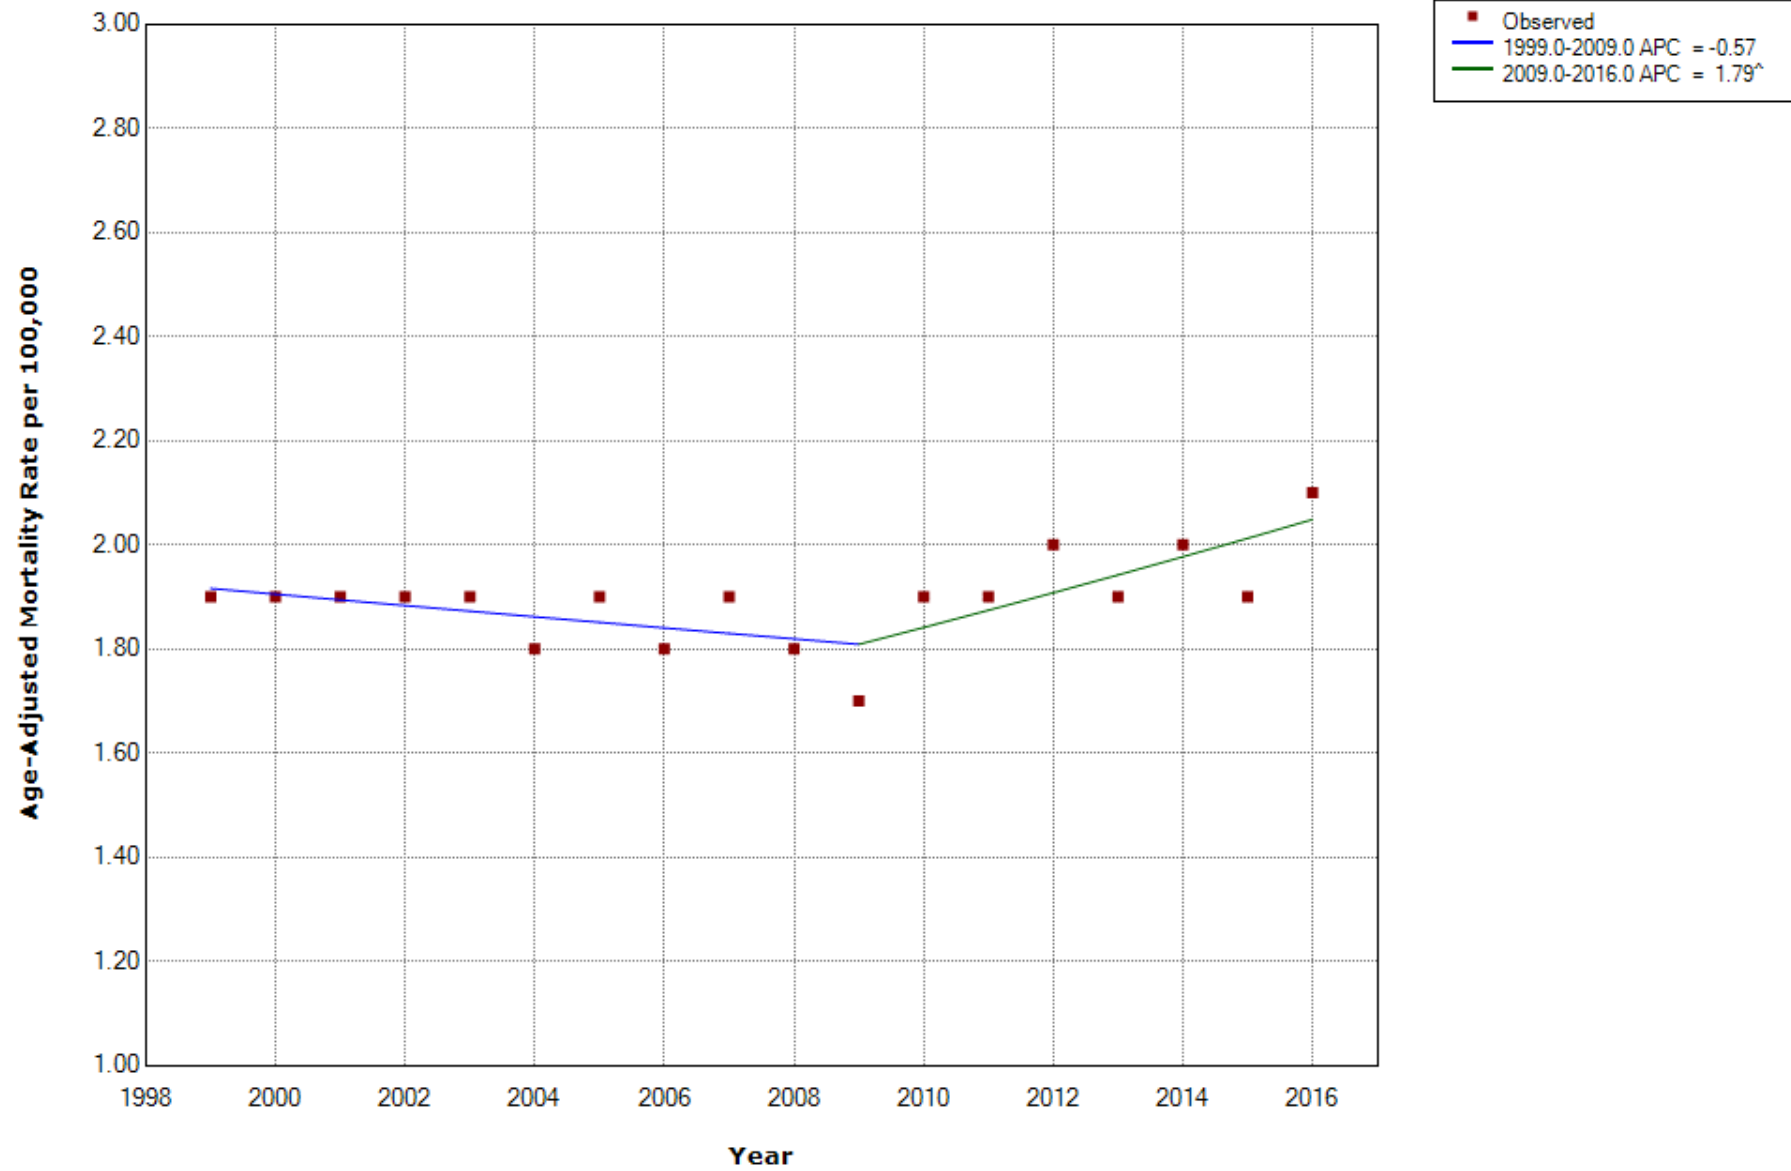

<sup>^</sup> Indicates that the Annual Percent Change (APC) is significantly different from zero at the alpha = 0.05 level.  
Final Selected Model: 1 Joinpoint.

### Extrapyramidal/movement disorders (G20-G25) / NH whites: 0 Joinpoints

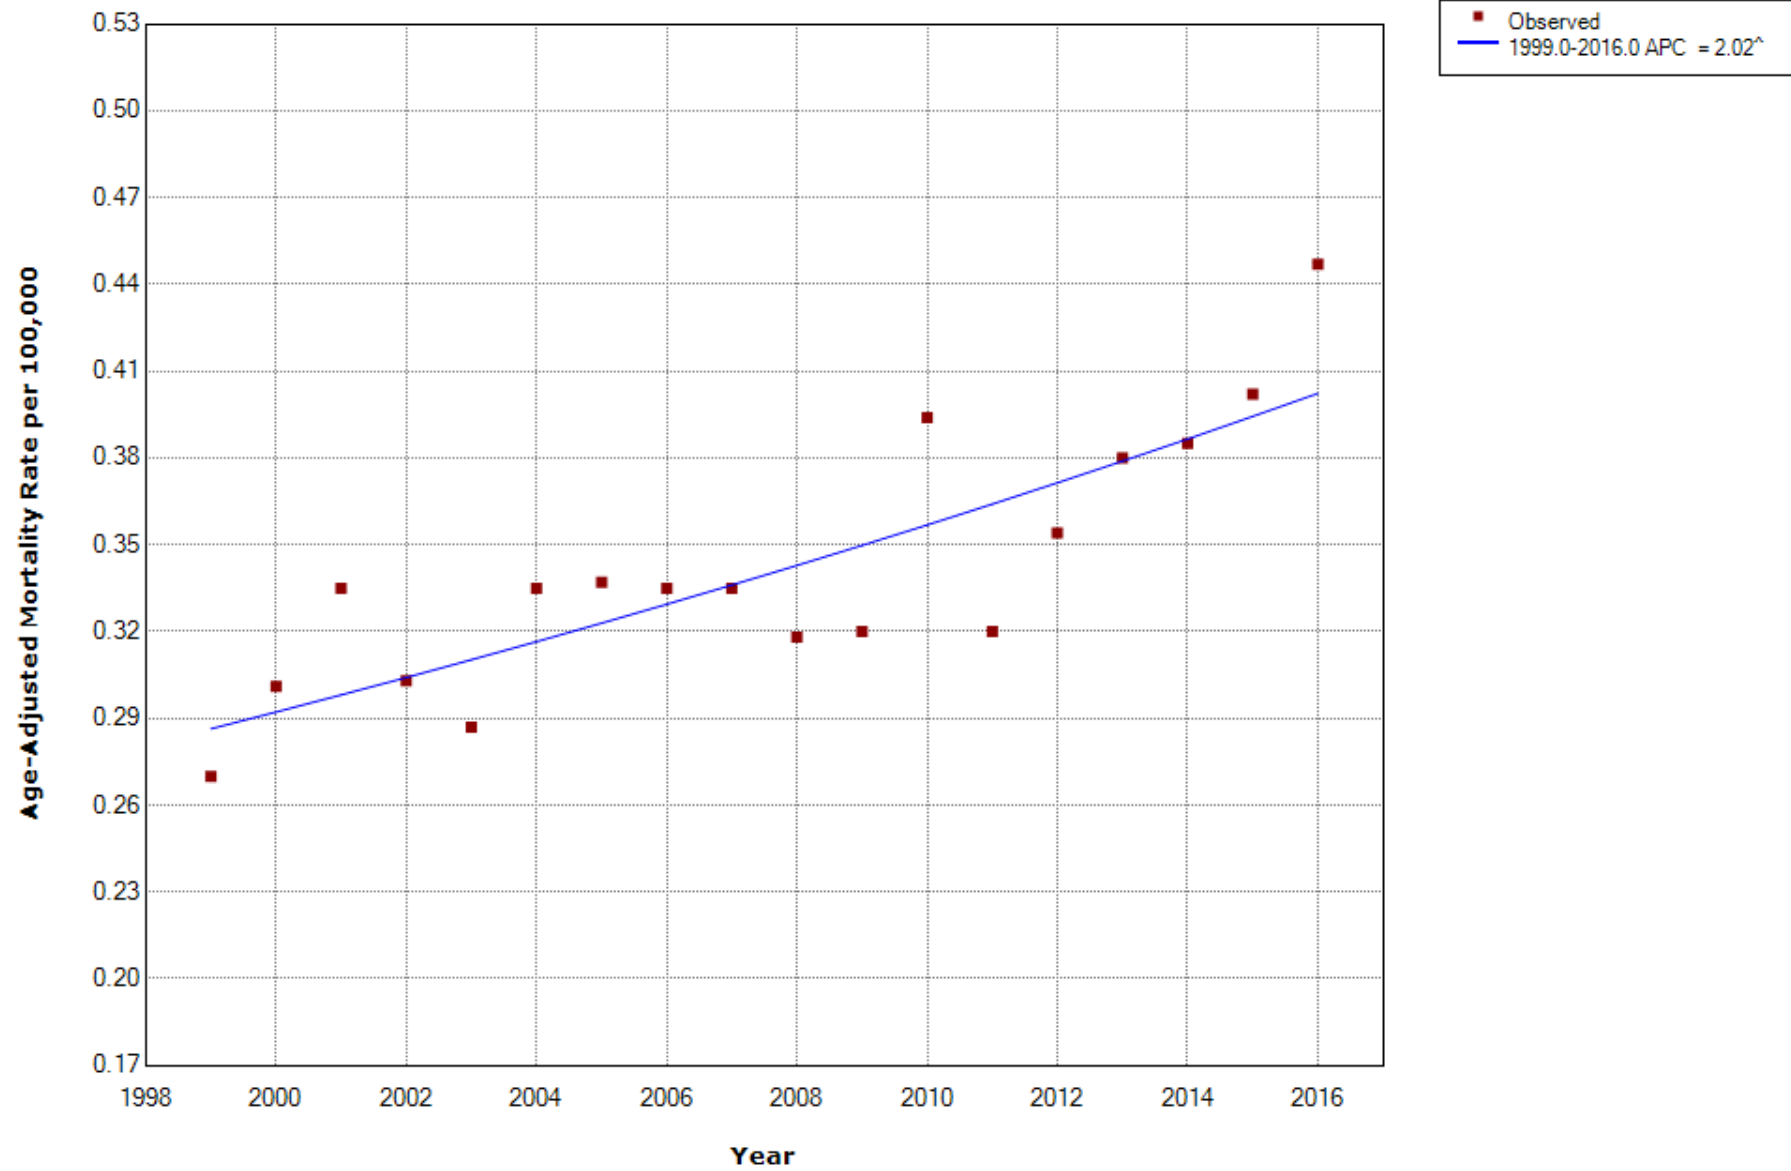

^ Indicates that the Annual Percent Change (APC) is significantly different from zero at the alpha = 0.05 level.  
Final Selected Model: 0 Joinpoints.

### Extrapyramidal/movement disorders (G20-G25) / Hispanics: Observed

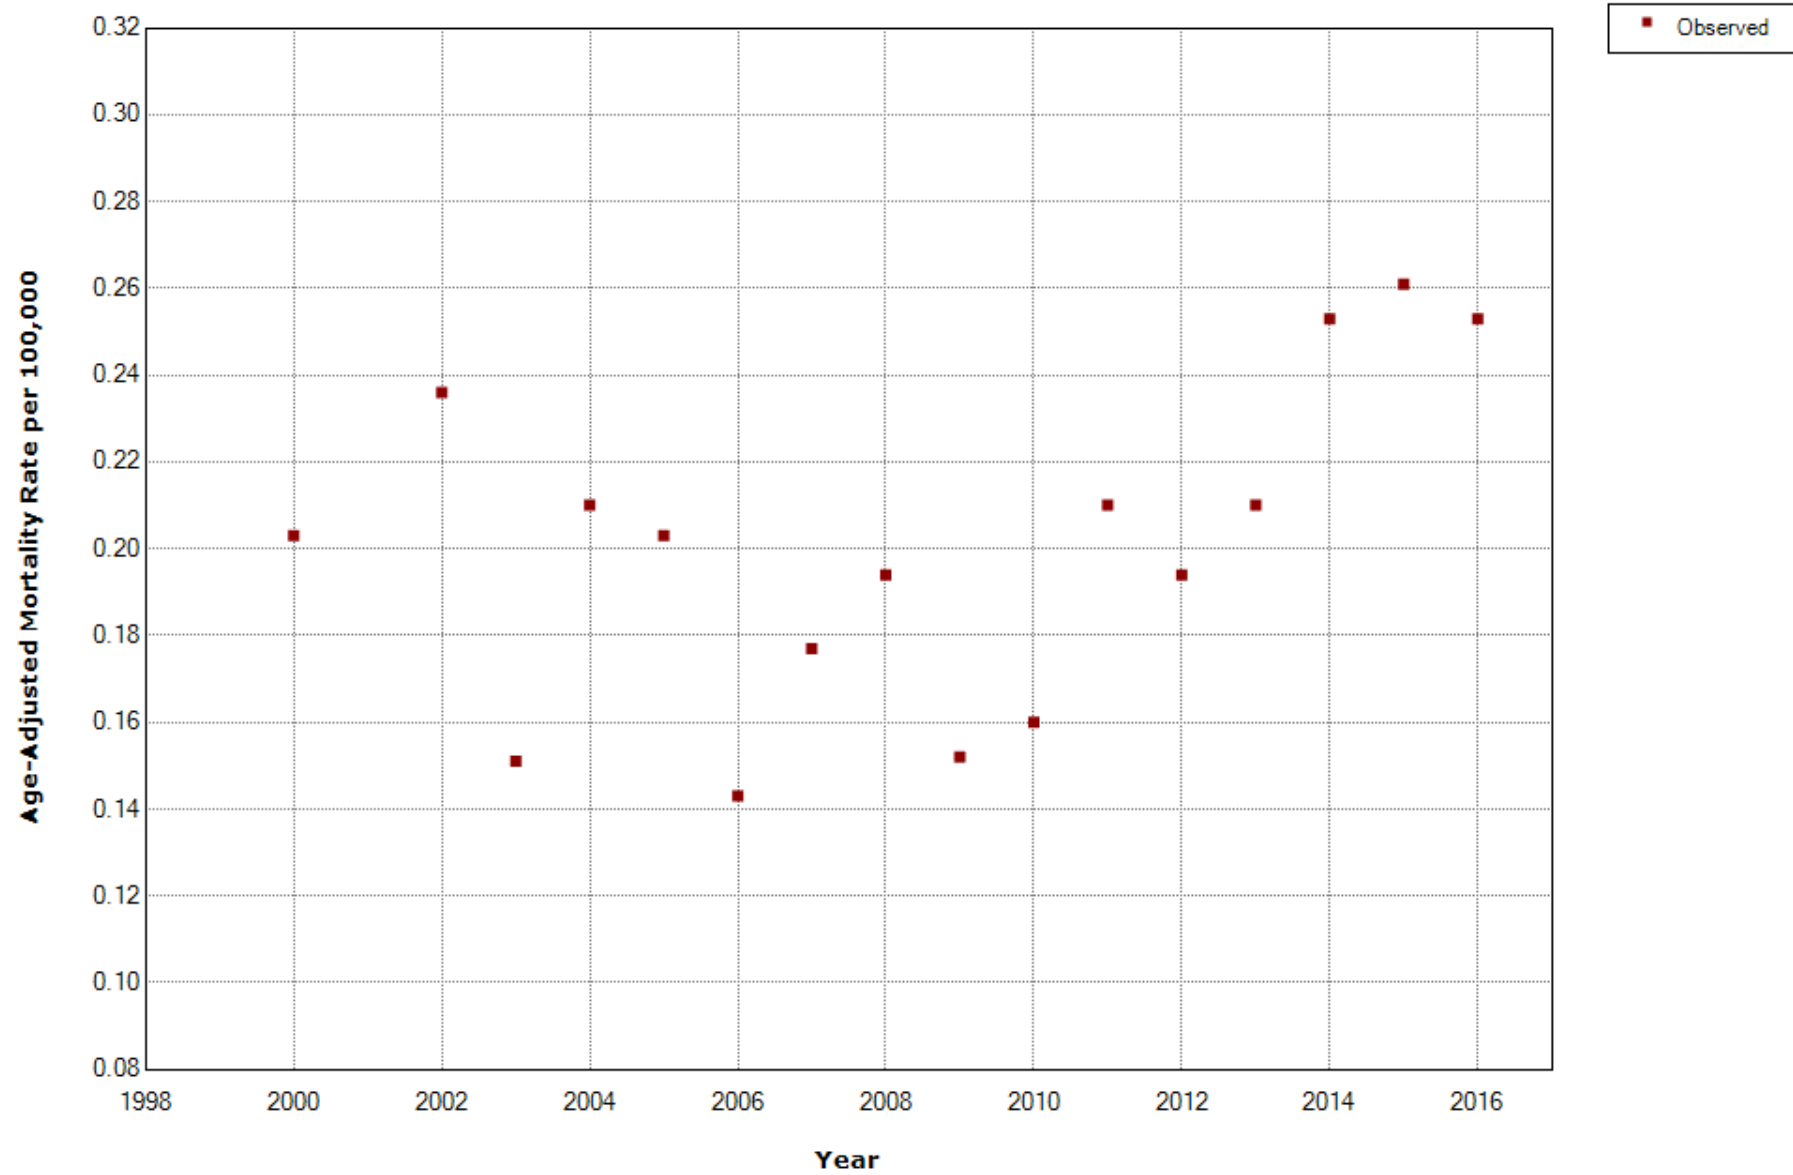

^ Indicates that the Annual Percent Change (APC) is significantly different from zero at the alpha = 0.05 level.

\* Joinpoint cannot process records with missing dependent variable values. Joinpoint will not analyze by-groups that have this error. (Row = 90, Col = 1)

### Inflammatory diseases (G00-G14) / NH whites: 0 Joinpoints

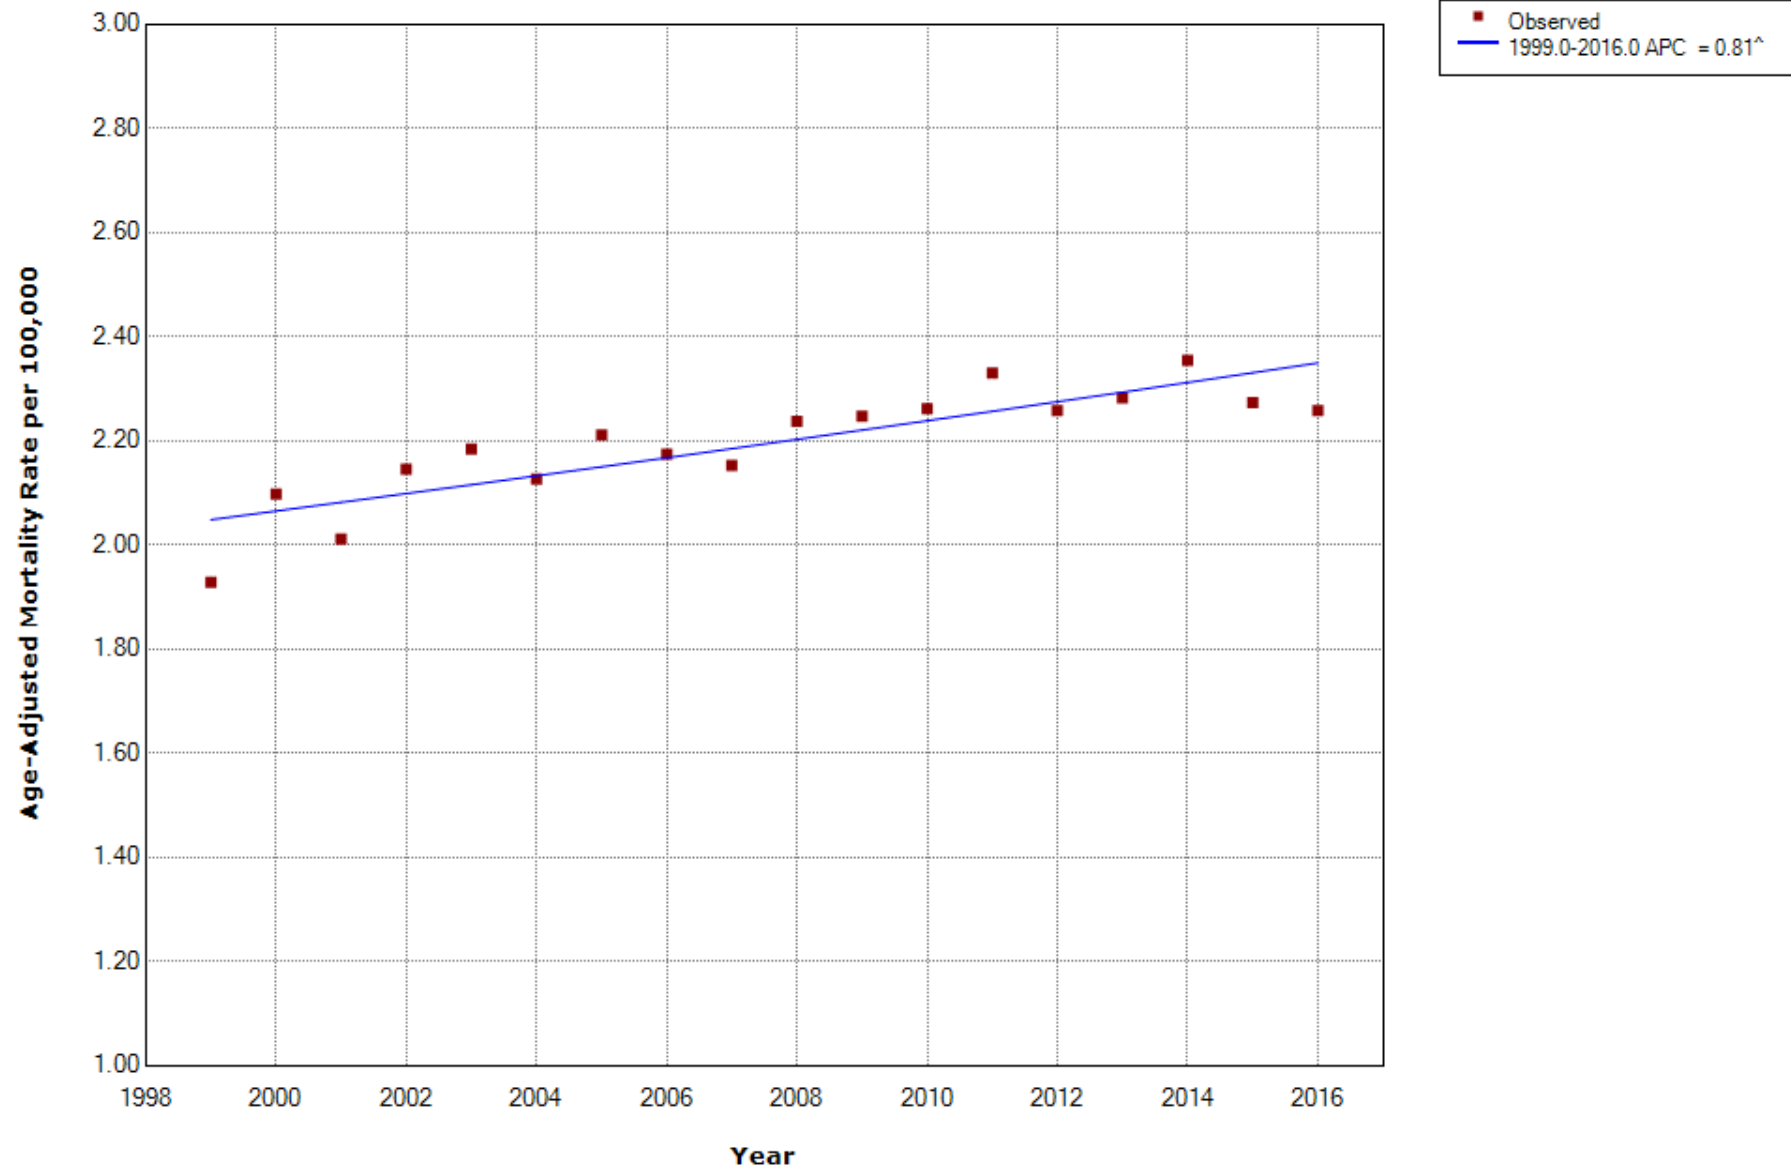

^ Indicates that the Annual Percent Change (APC) is significantly different from zero at the alpha = 0.05 level.  
Final Selected Model: 0 Joinpoints.



Misc. endocrine disorders (E00-E07, 15-16, 20-34, 40-46) / NH whites: 0 Joinpoints

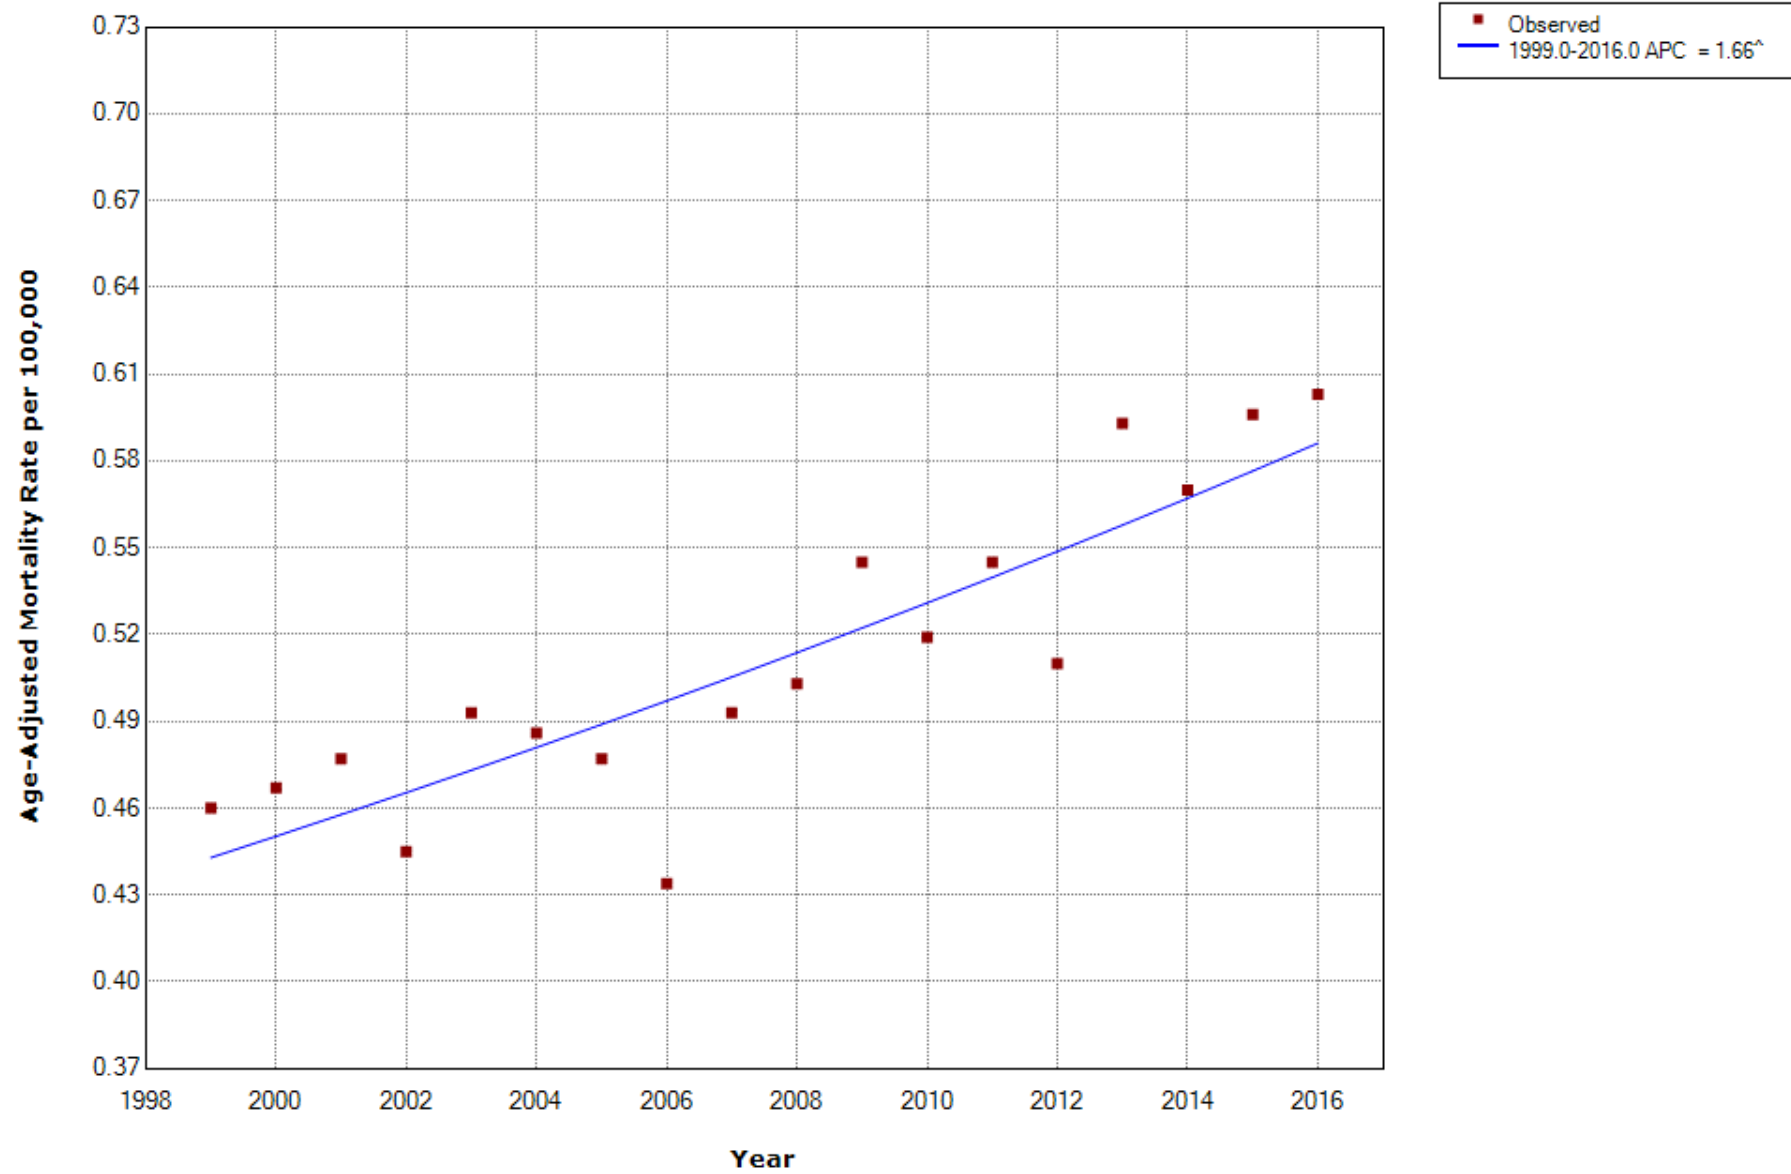

^ Indicates that the Annual Percent Change (APC) is significantly different from zero at the alpha = 0.05 level.  
Final Selected Model: 0 Joinpoints.

E00-E07, 15-16, 20-34, 40-46 (Other endocrine disorders {e.g., thyroid and other endocrine glands, malnutrition}) / NH  
Blacks: 0 Joinpoints

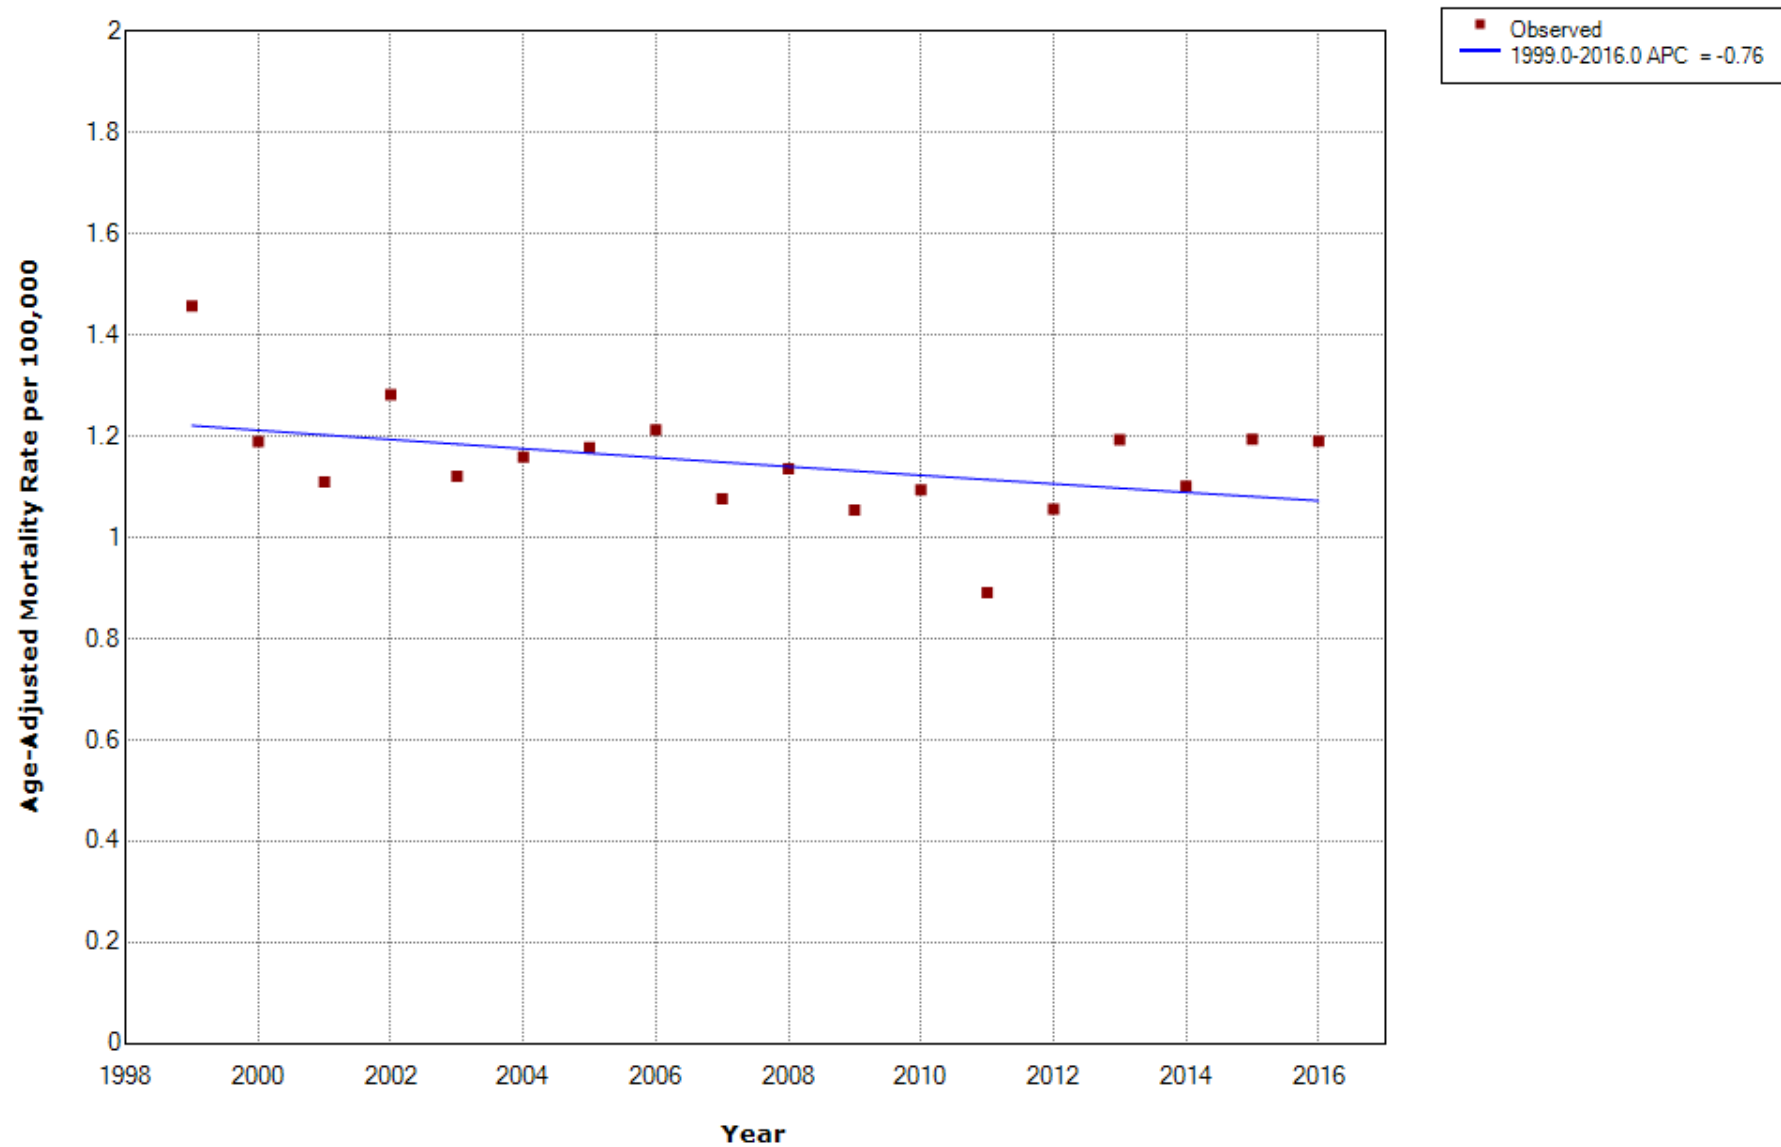

^ Indicates that the Annual Percent Change (APC) is significantly different from zero at the alpha = 0.05 level.  
Final Selected Model: 0 Joinpoints.

Misc. peripheral diseases (G50-G72) / NH whites: 0 Joinpoints

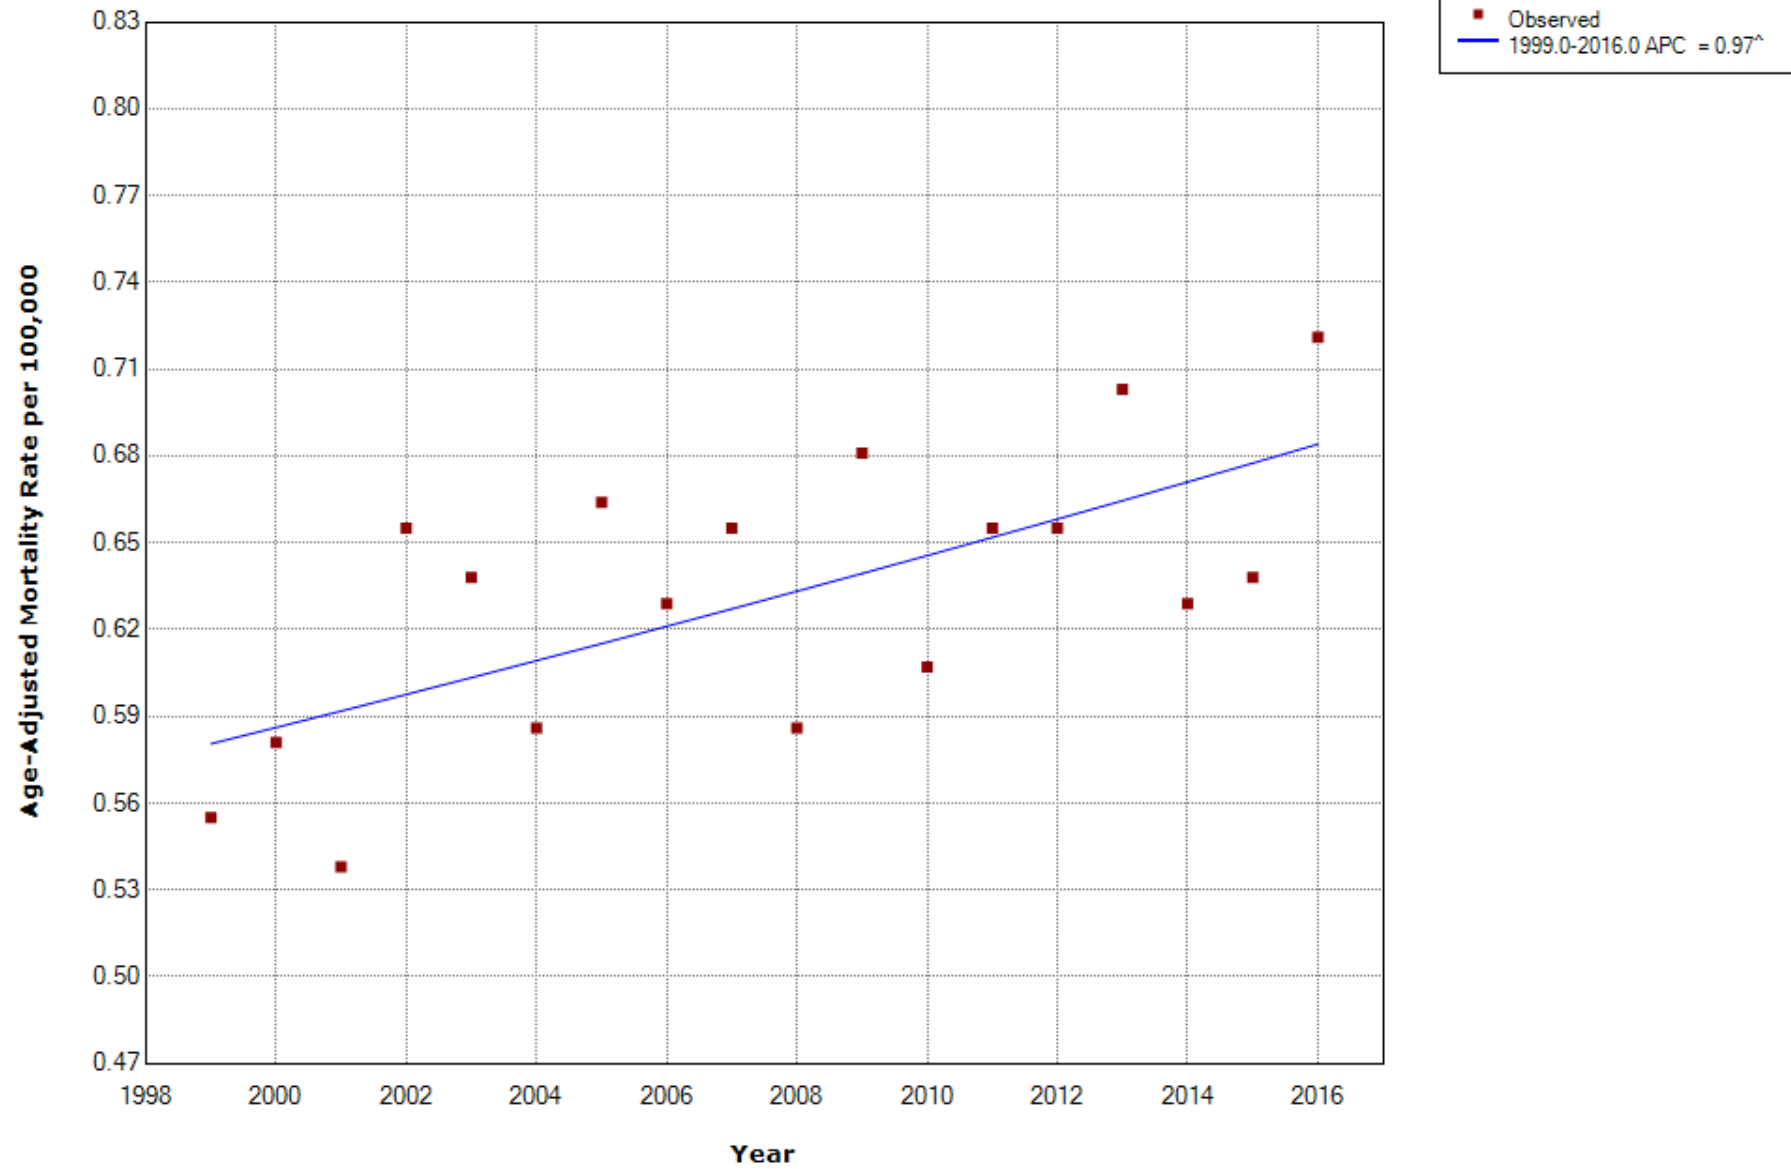

^ Indicates that the Annual Percent Change (APC) is significantly different from zero at the alpha = 0.05 level.  
Final Selected Model: 0 Joinpoints.

Misc. peripheral diseases (G50-G72) / Hispanics: 0 Joinpoints

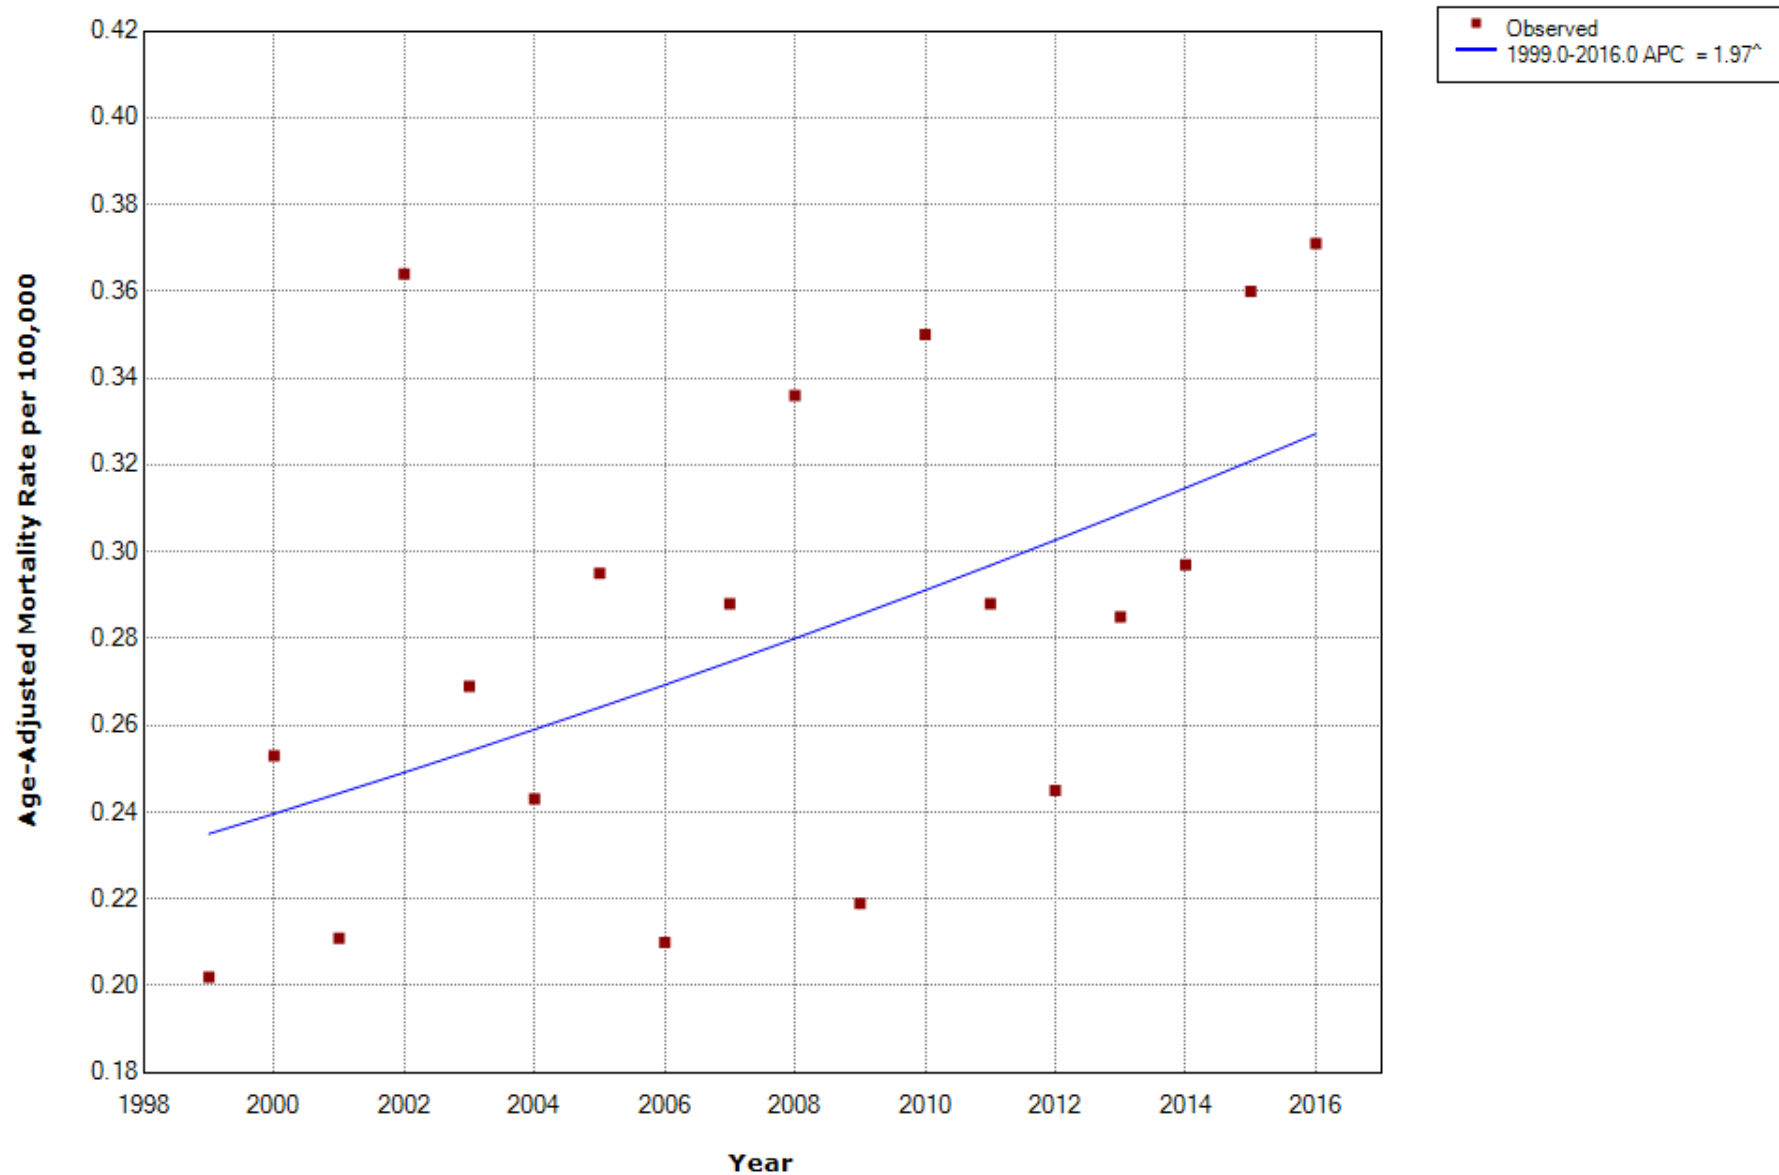

^ Indicates that the Annual Percent Change (APC) is significantly different from zero at the alpha = 0.05 level.  
Final Selected Model: 0 Joinpoints.

Misc. respiratory system disorders (J96-J98) / NH whites: 2 Joinpoints

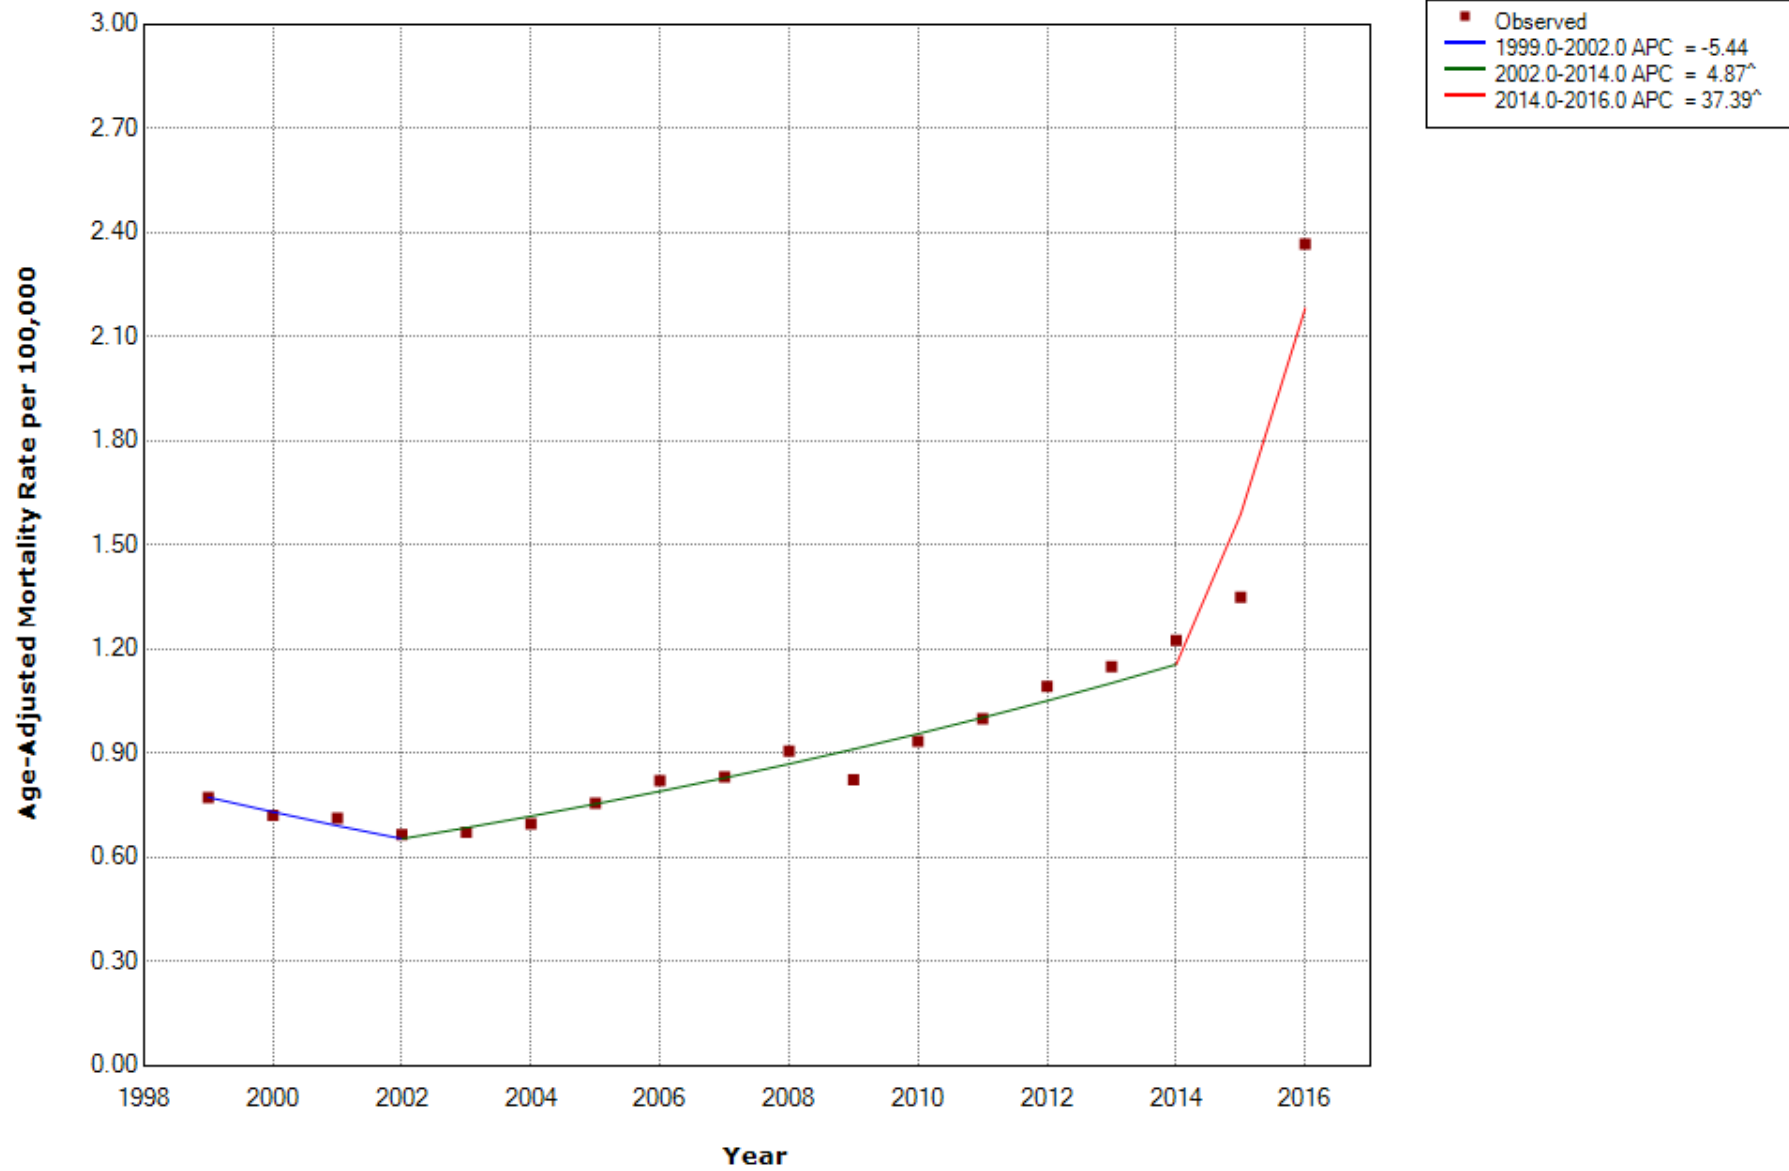

^ Indicates that the Annual Percent Change (APC) is significantly different from zero at the alpha = 0.05 level.  
Final Selected Model: 2 Joinpoints.

### Misc. respiratory system disorders (J96-J98) / NH Blacks: 1 Joinpoint

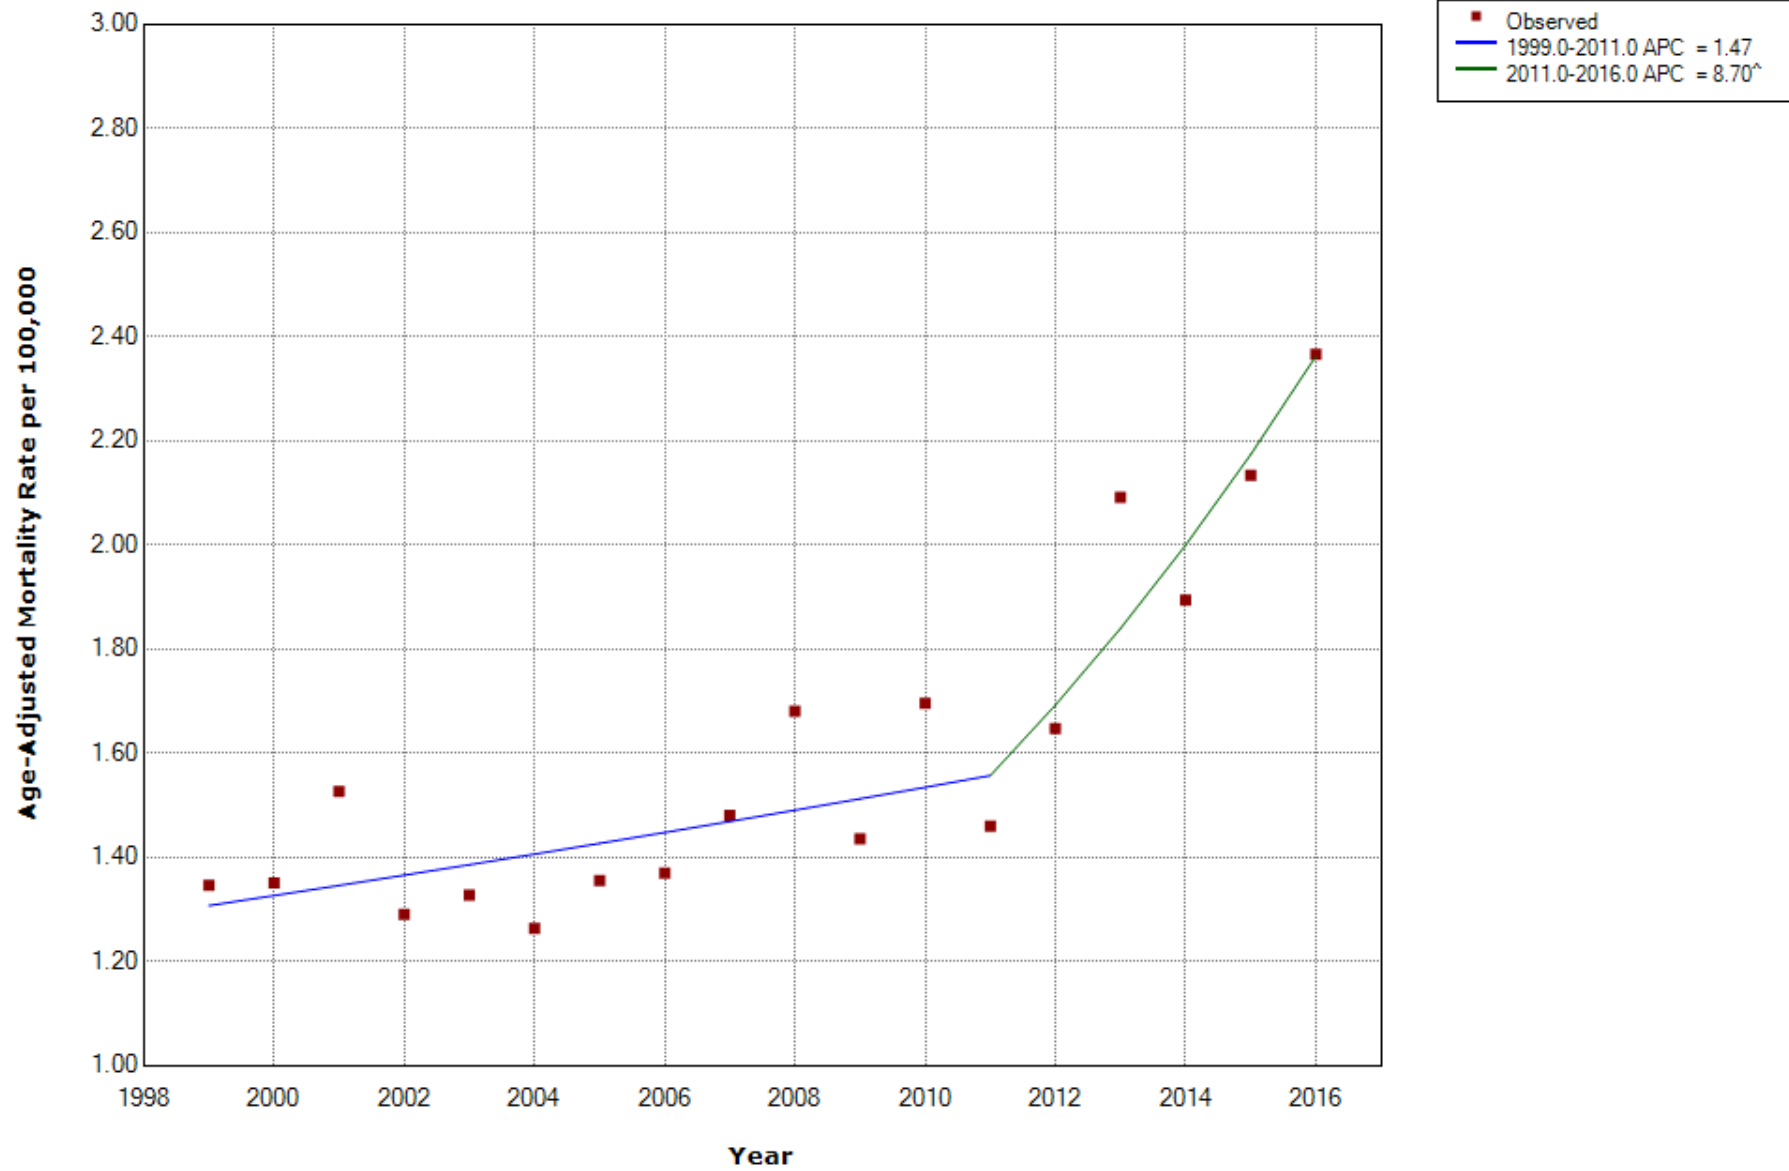

^ Indicates that the Annual Percent Change (APC) is significantly different from zero at the alpha = 0.05 level.  
Final Selected Model: 1 Joinpoint.

Misc. respiratory system disorders (J96-J98) / Hispanics: 0 Joinpoints

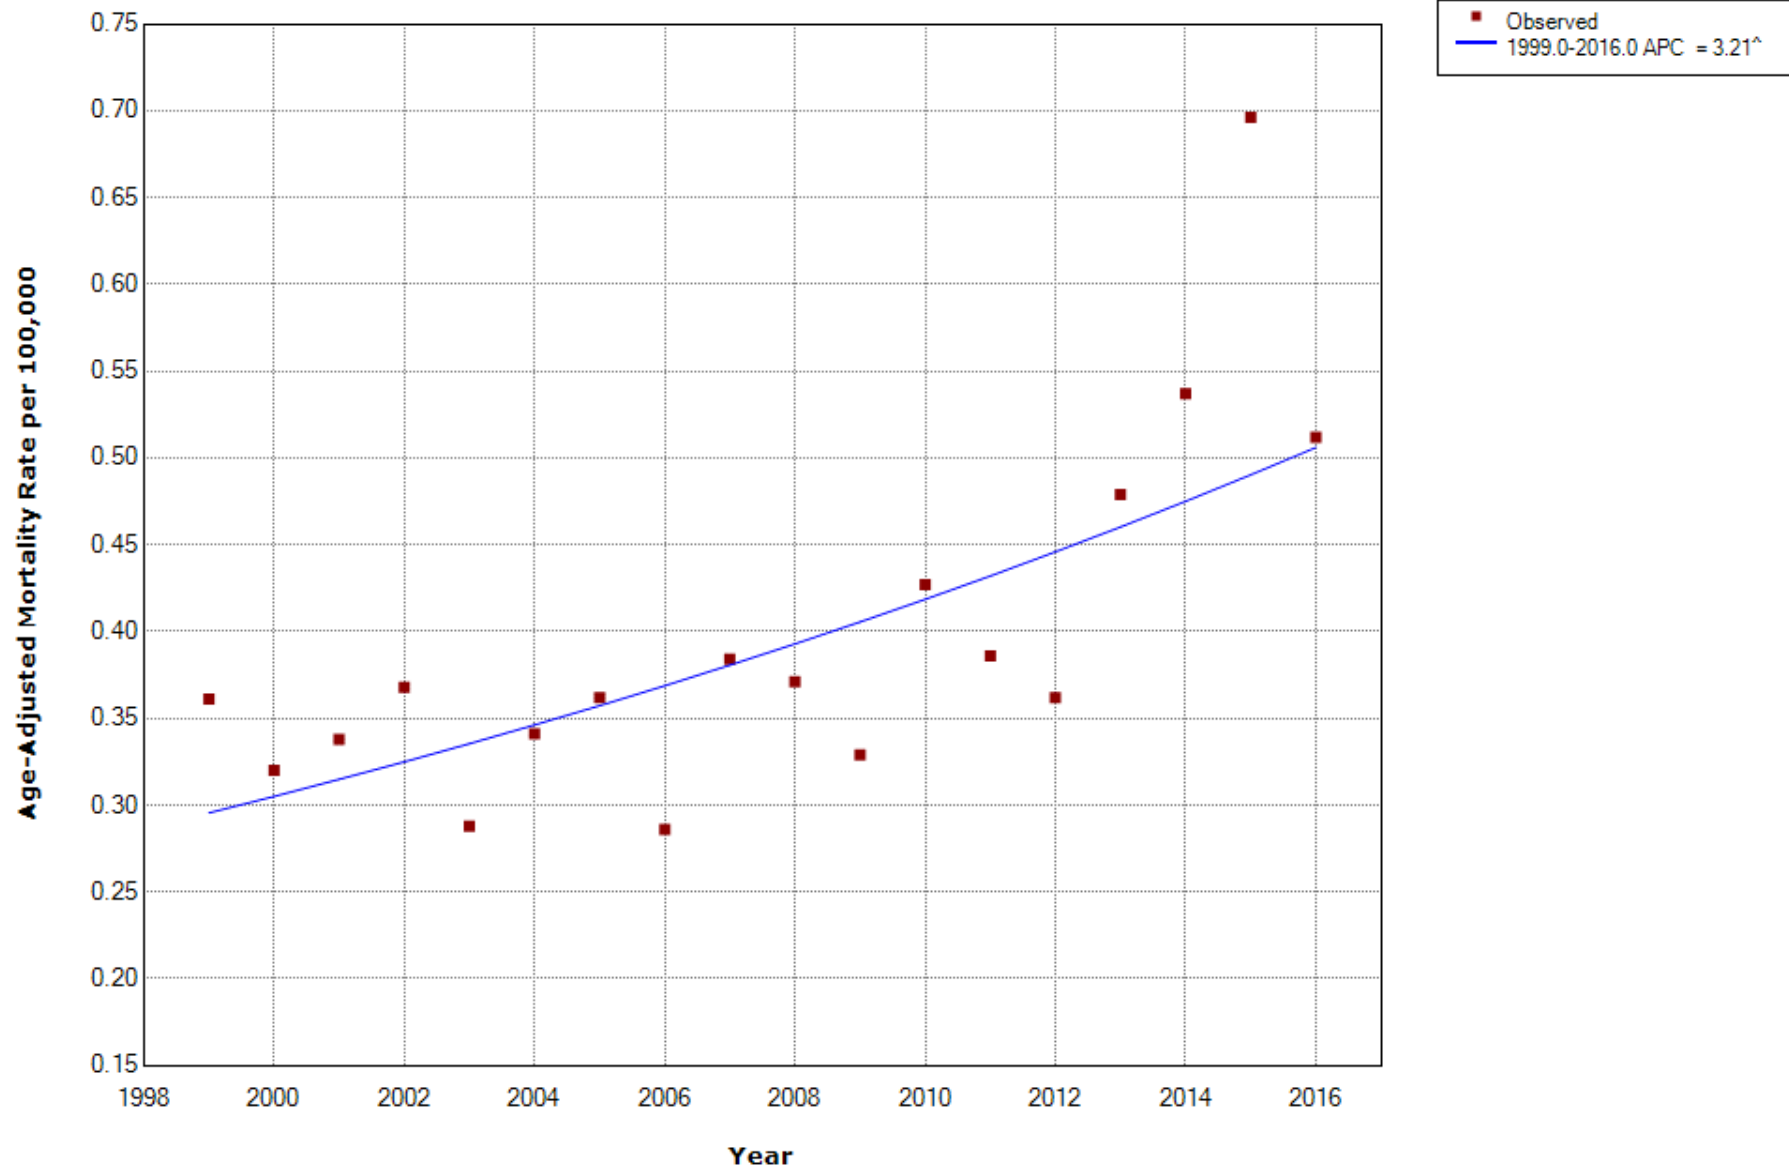

^ Indicates that the Annual Percent Change (APC) is significantly different from zero at the alpha = 0.05 level.  
Final Selected Model: 0 Joinpoints.

Other forms of accidental poisoning (X46-X49) / NH whites: 0 Joinpoints

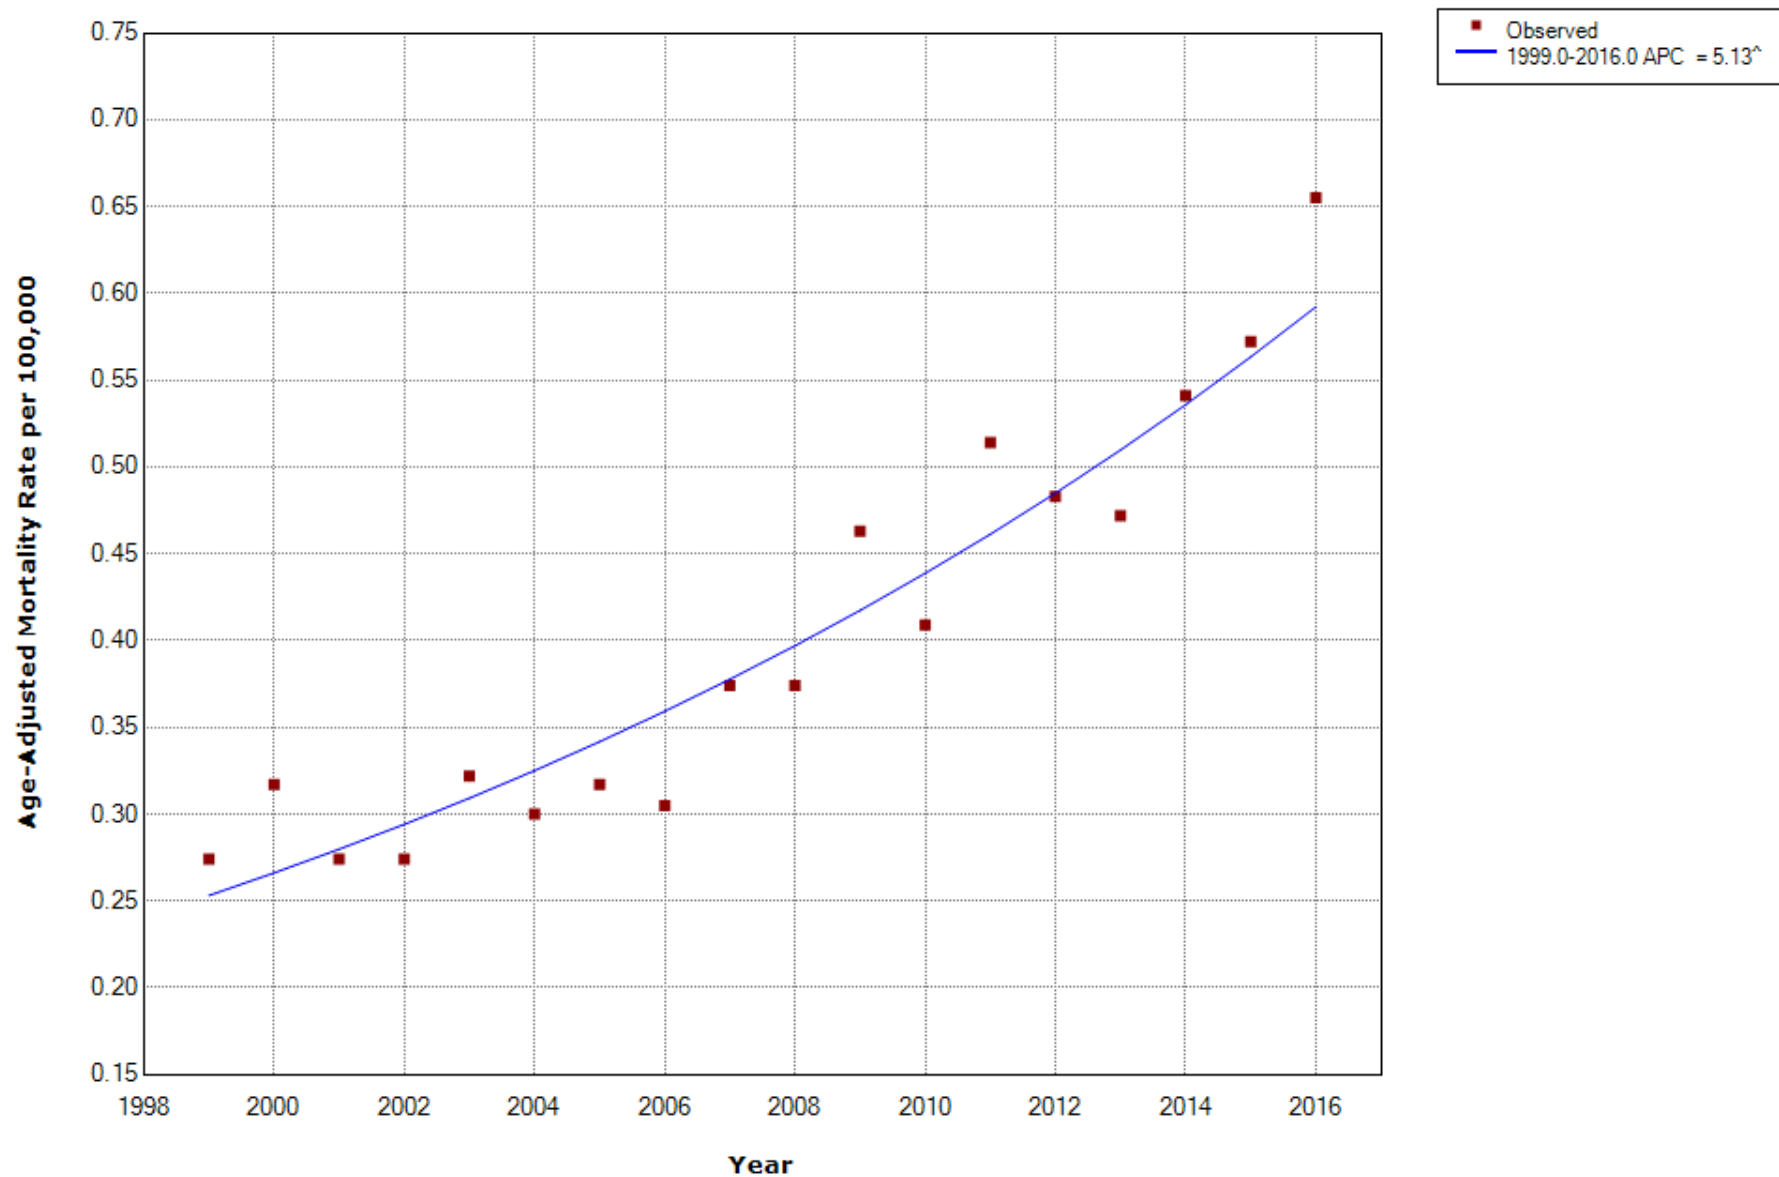

^ Indicates that the Annual Percent Change (APC) is significantly different from zero at the alpha = 0.05 level.  
Final Selected Model: 0 Joinpoints.



Other urinary system diseases (N00-N15, N20-39) / NH whites: 0 Joinpoints

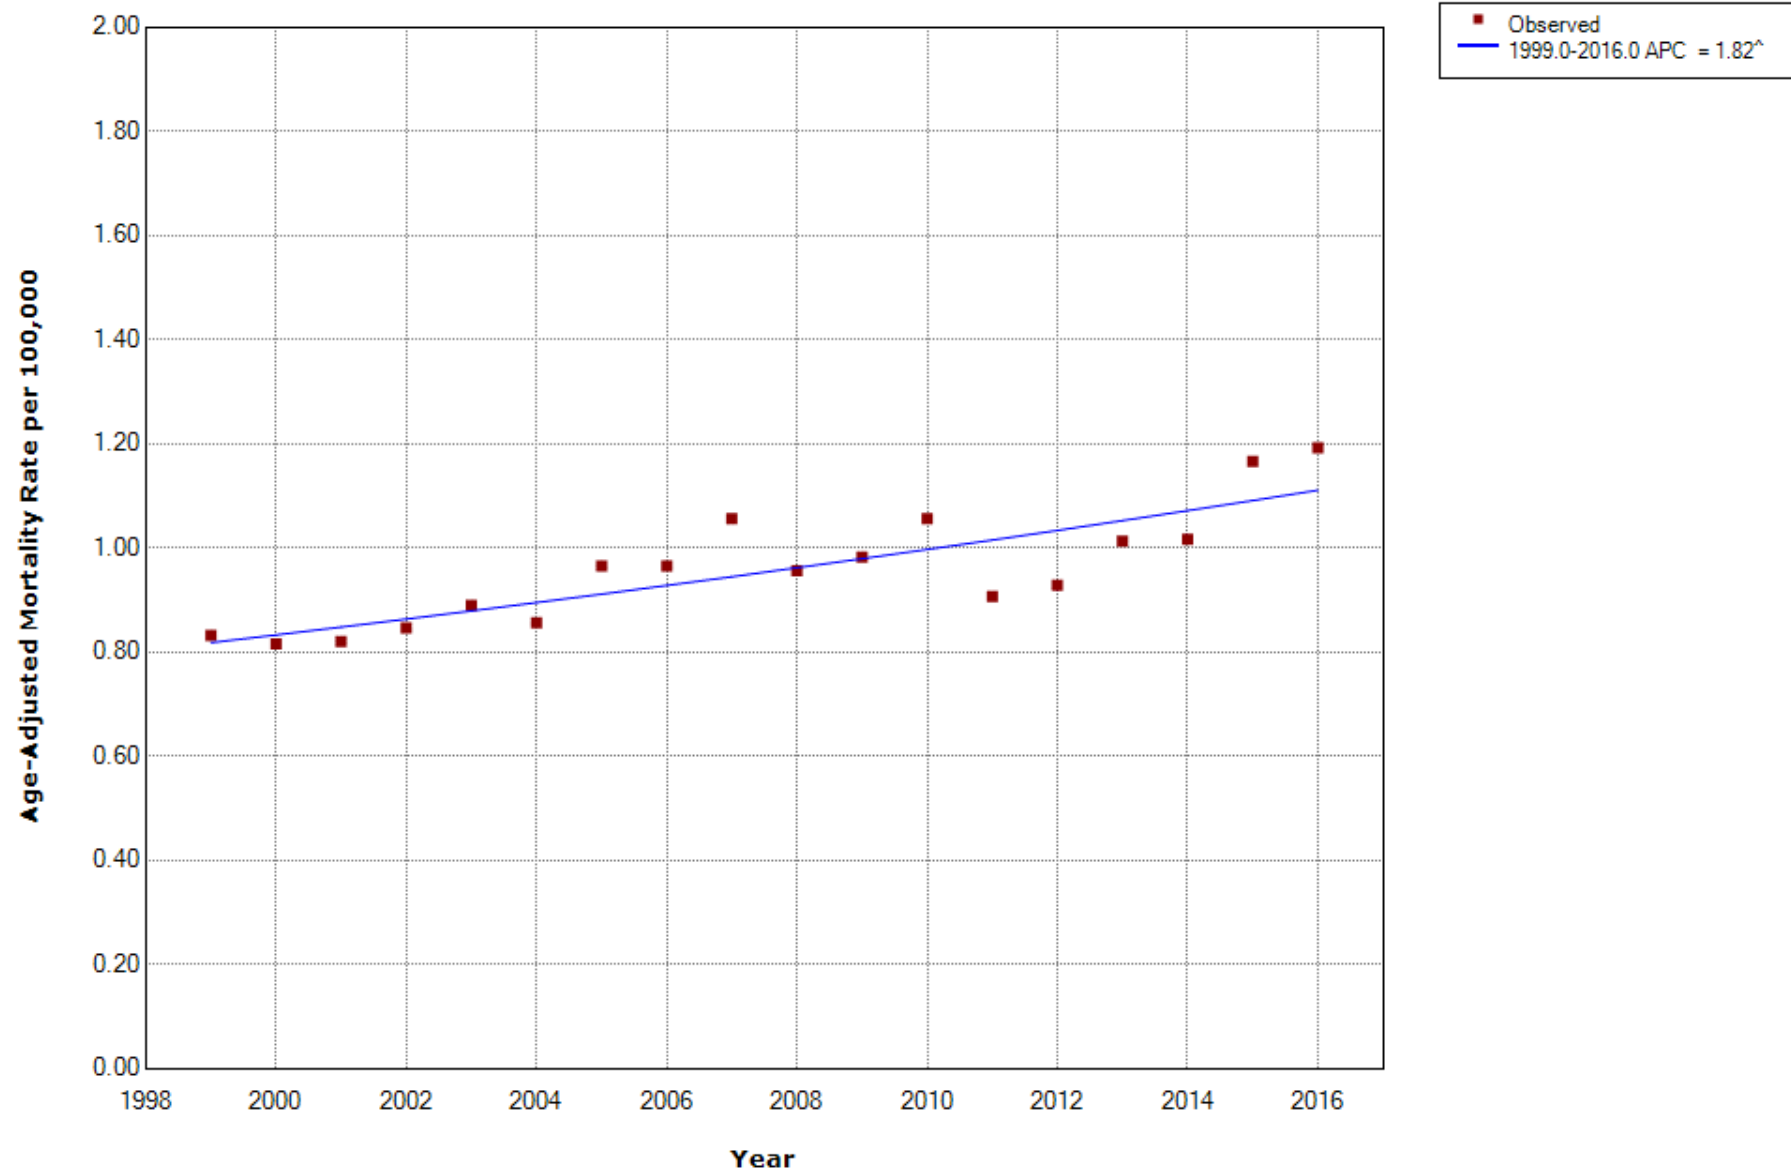

^ Indicates that the Annual Percent Change (APC) is significantly different from zero at the alpha = 0.05 level.  
Final Selected Model: 0 Joinpoints.

Other urinary system diseases (N00-N15, N20-39) / NH Blacks: 0 Joinpoints

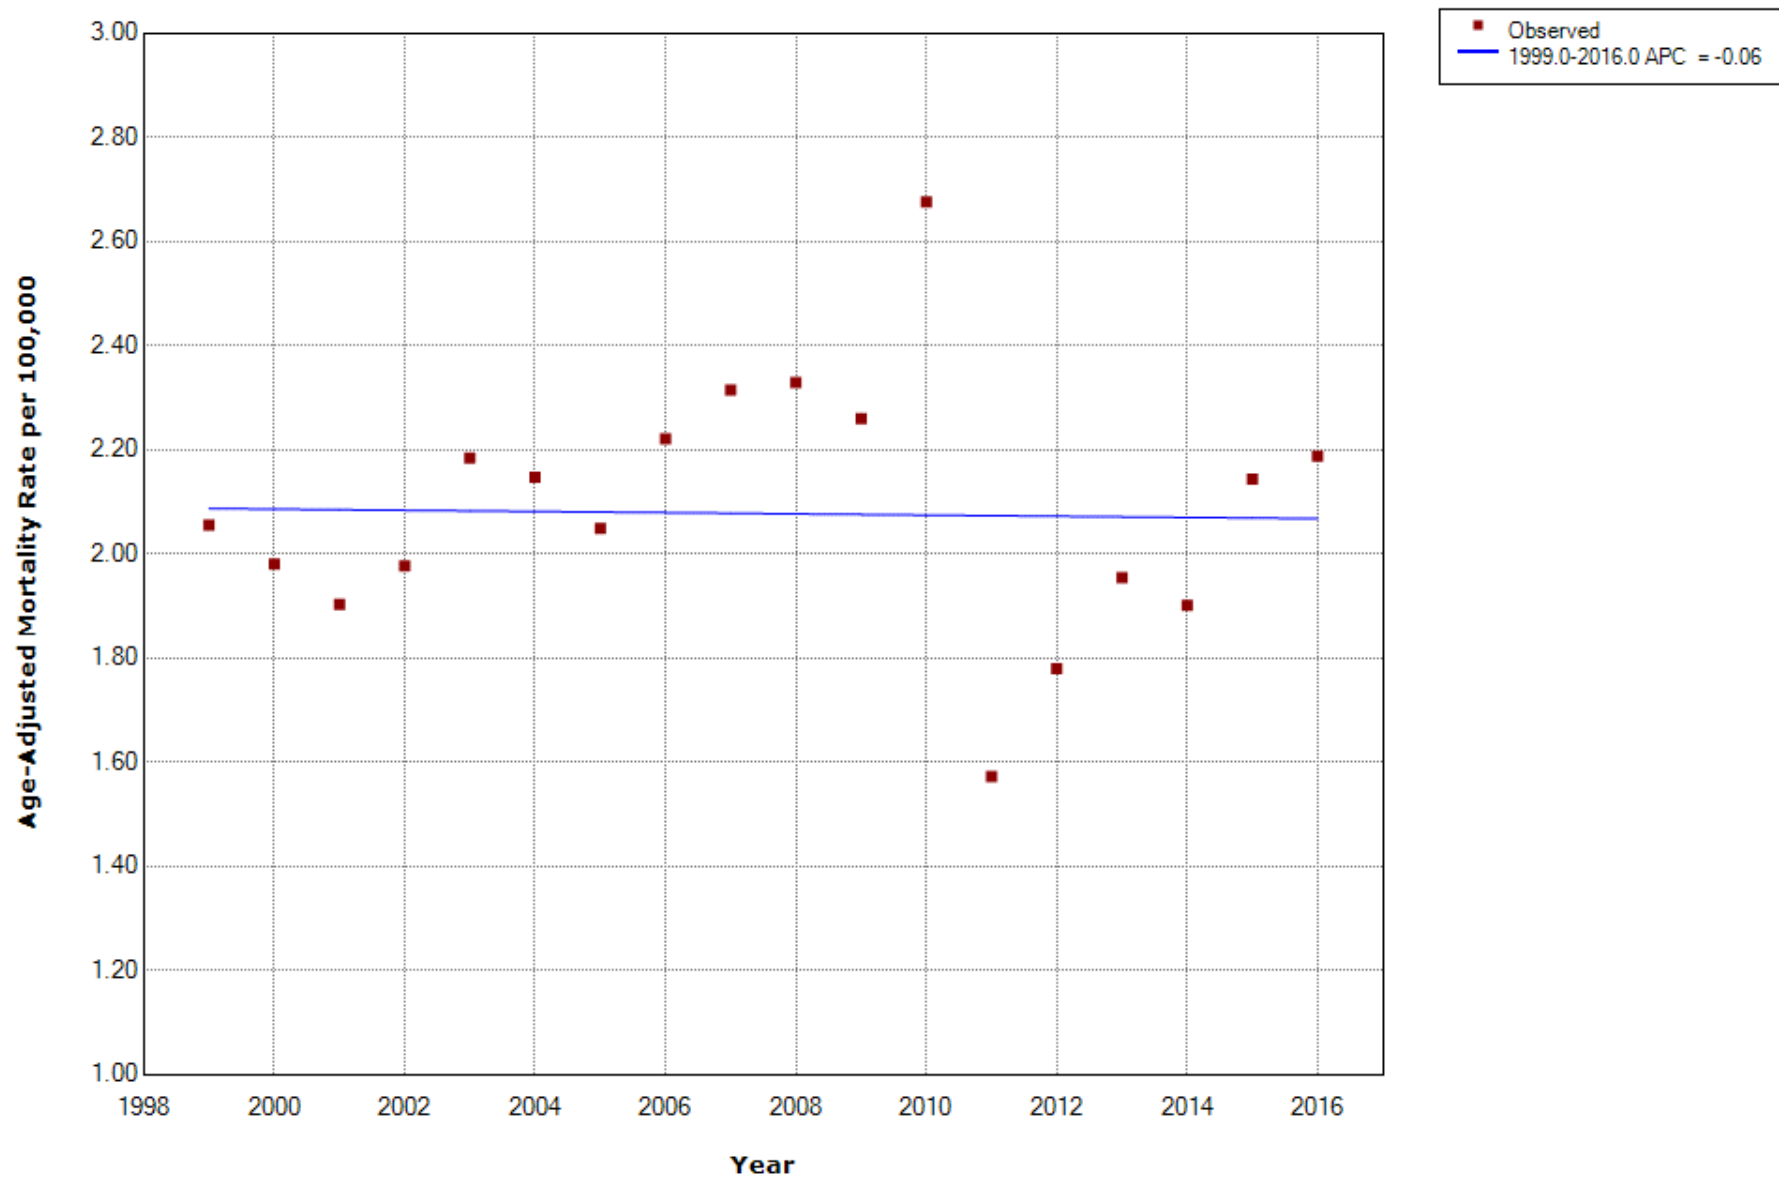

^ Indicates that the Annual Percent Change (APC) is significantly different from zero at the alpha = 0.05 level.  
Final Selected Model: 0 Joinpoints.

Pulmonary heart disease (I26-I28) / NH whites: 2 Joinpoints

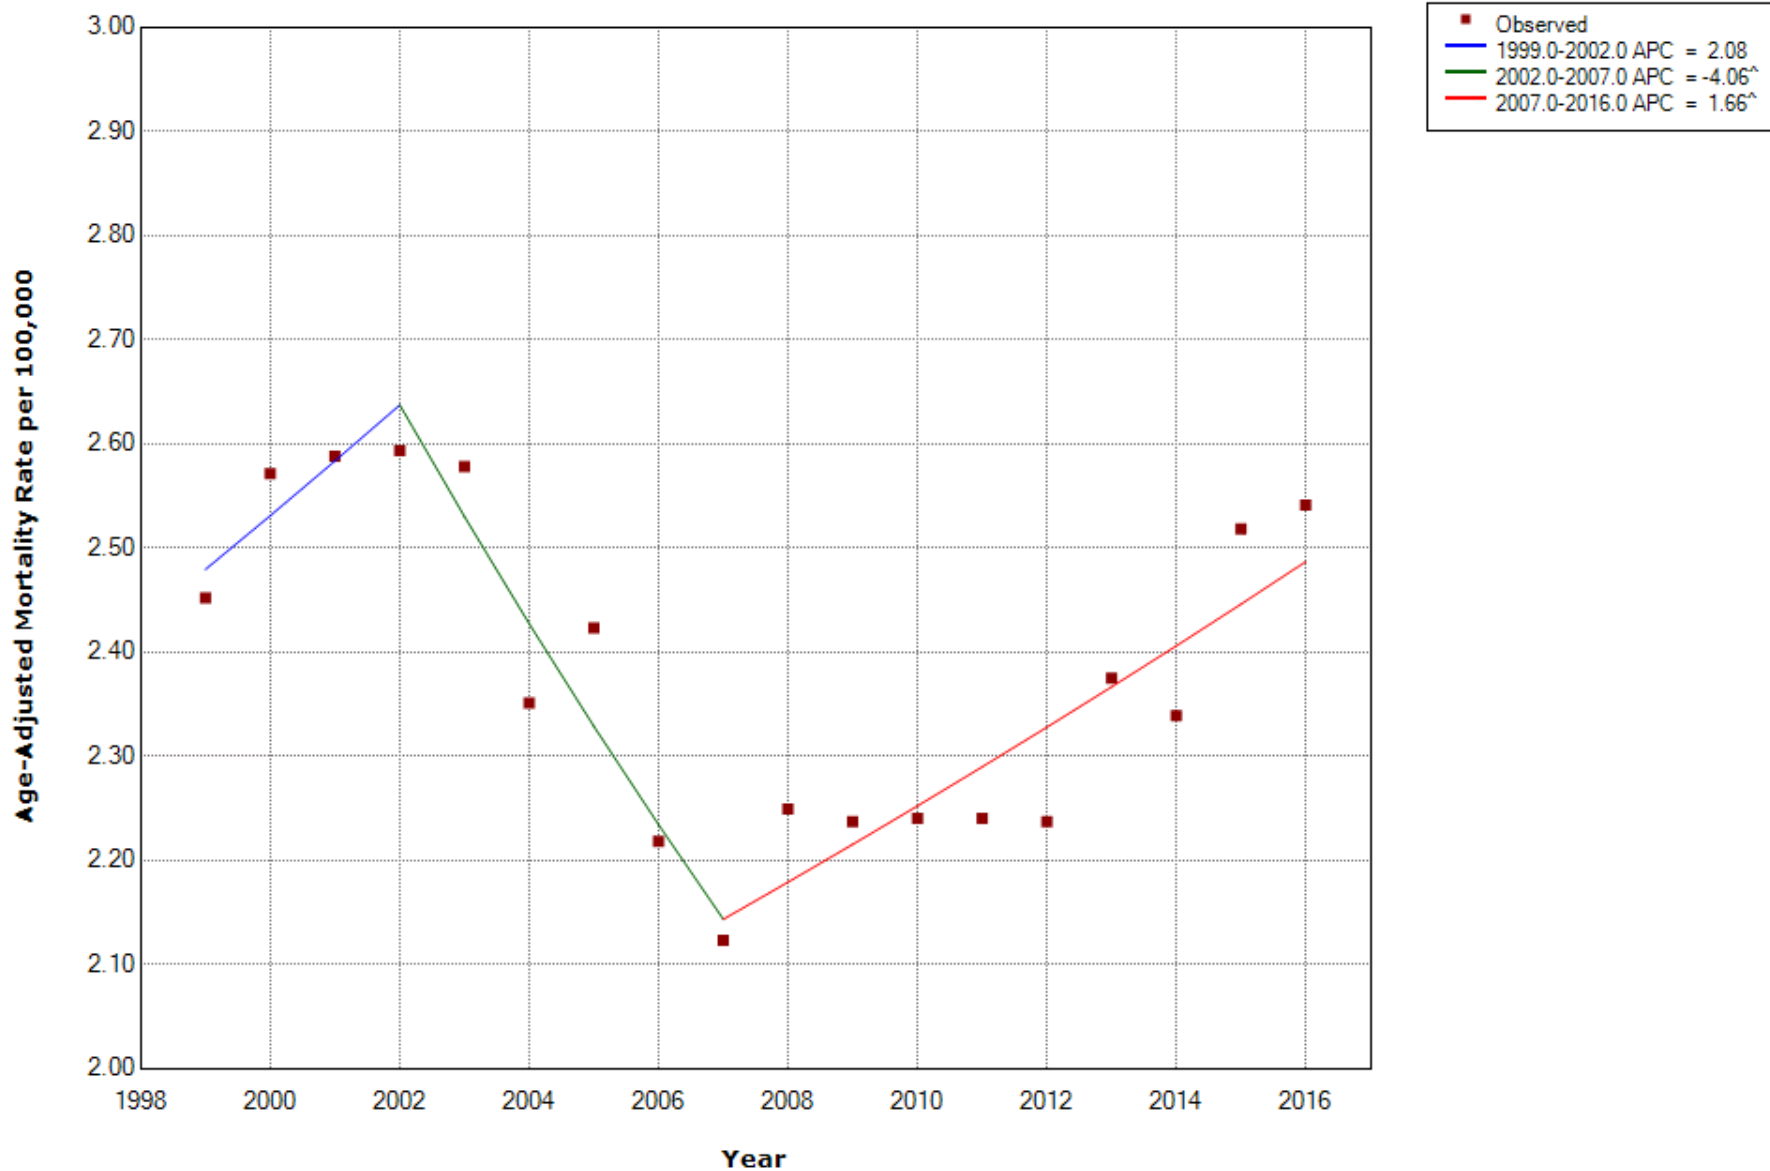

^ Indicates that the Annual Percent Change (APC) is significantly different from zero at the alpha = 0.05 level.  
Final Selected Model: 2 Joinpoints.

### Pulmonary heart disease (I26-I28) / NH Blacks: 1 Joinpoint

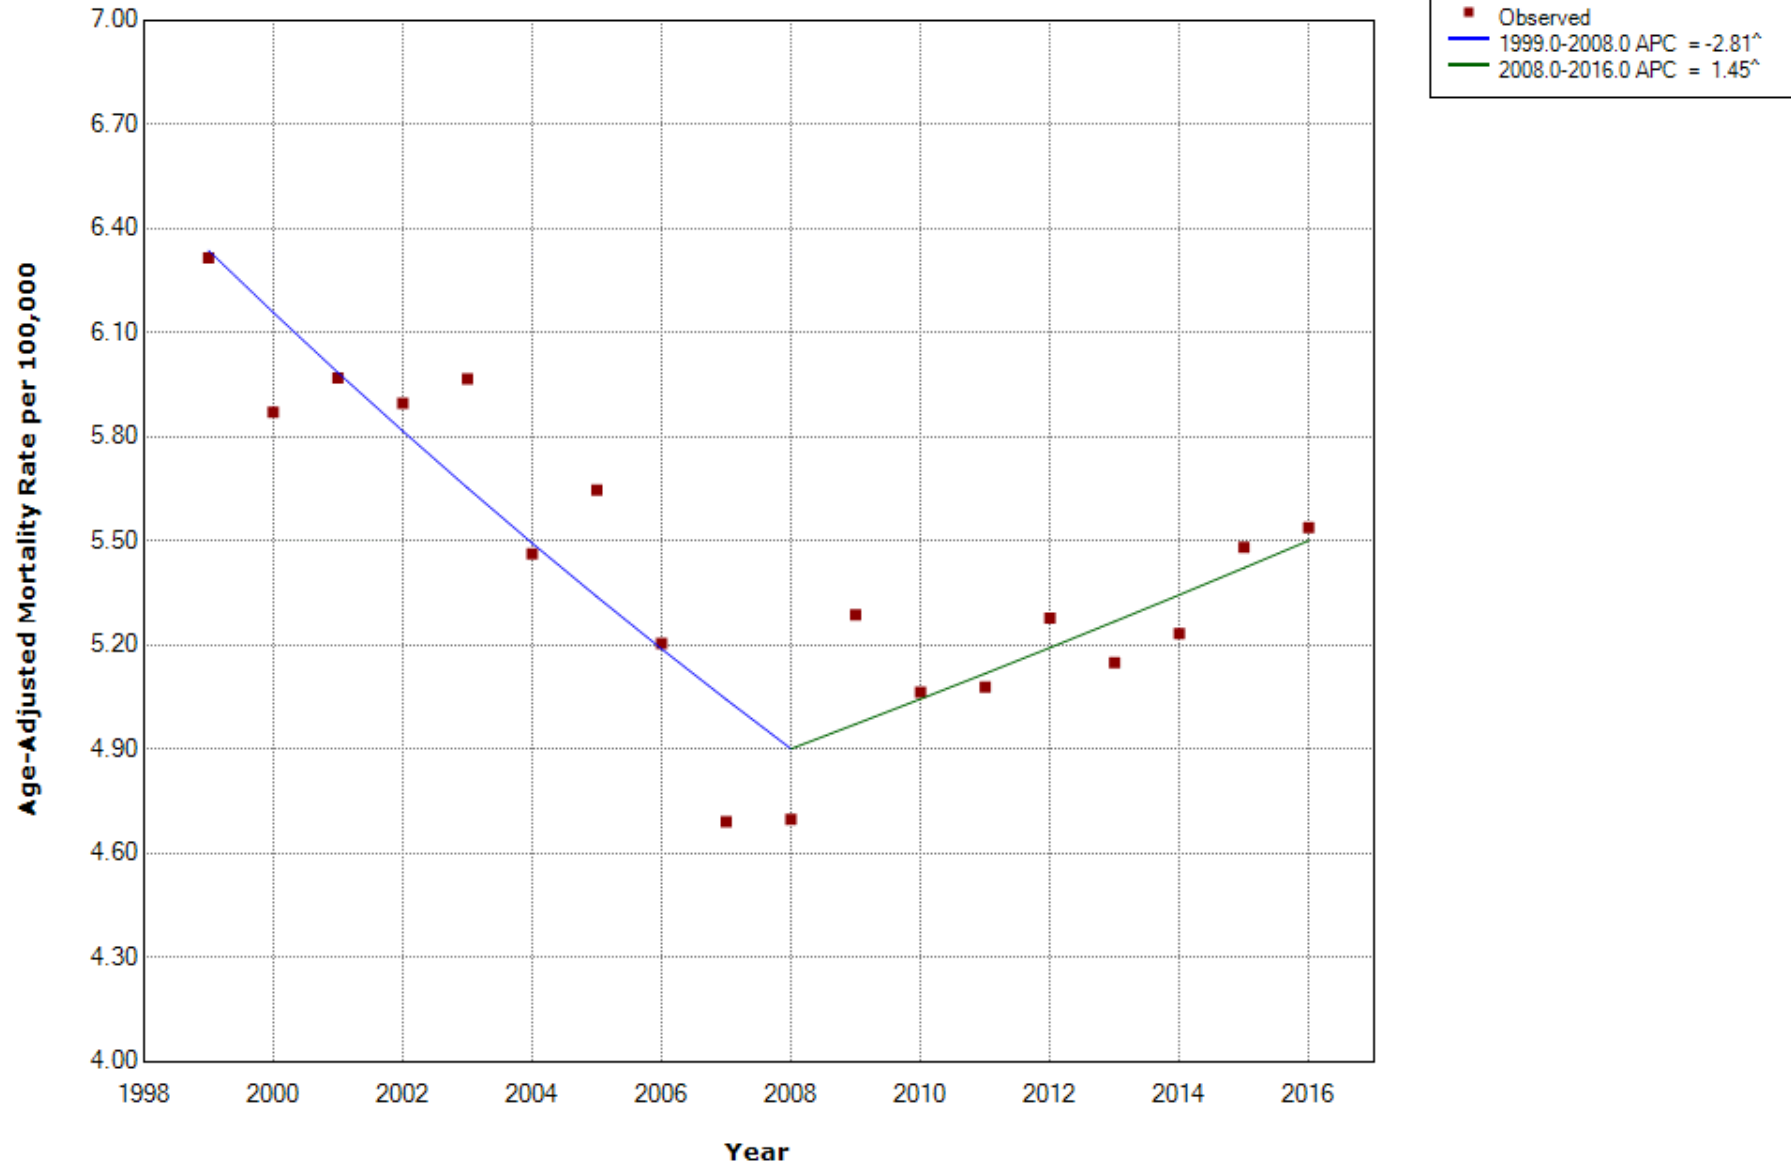

^ Indicates that the Annual Percent Change (APC) is significantly different from zero at the alpha = 0.05 level.  
Final Selected Model: 1 Joinpoint.

### Renal failure (N17-N19) / NH whites: 2 Joinpoints

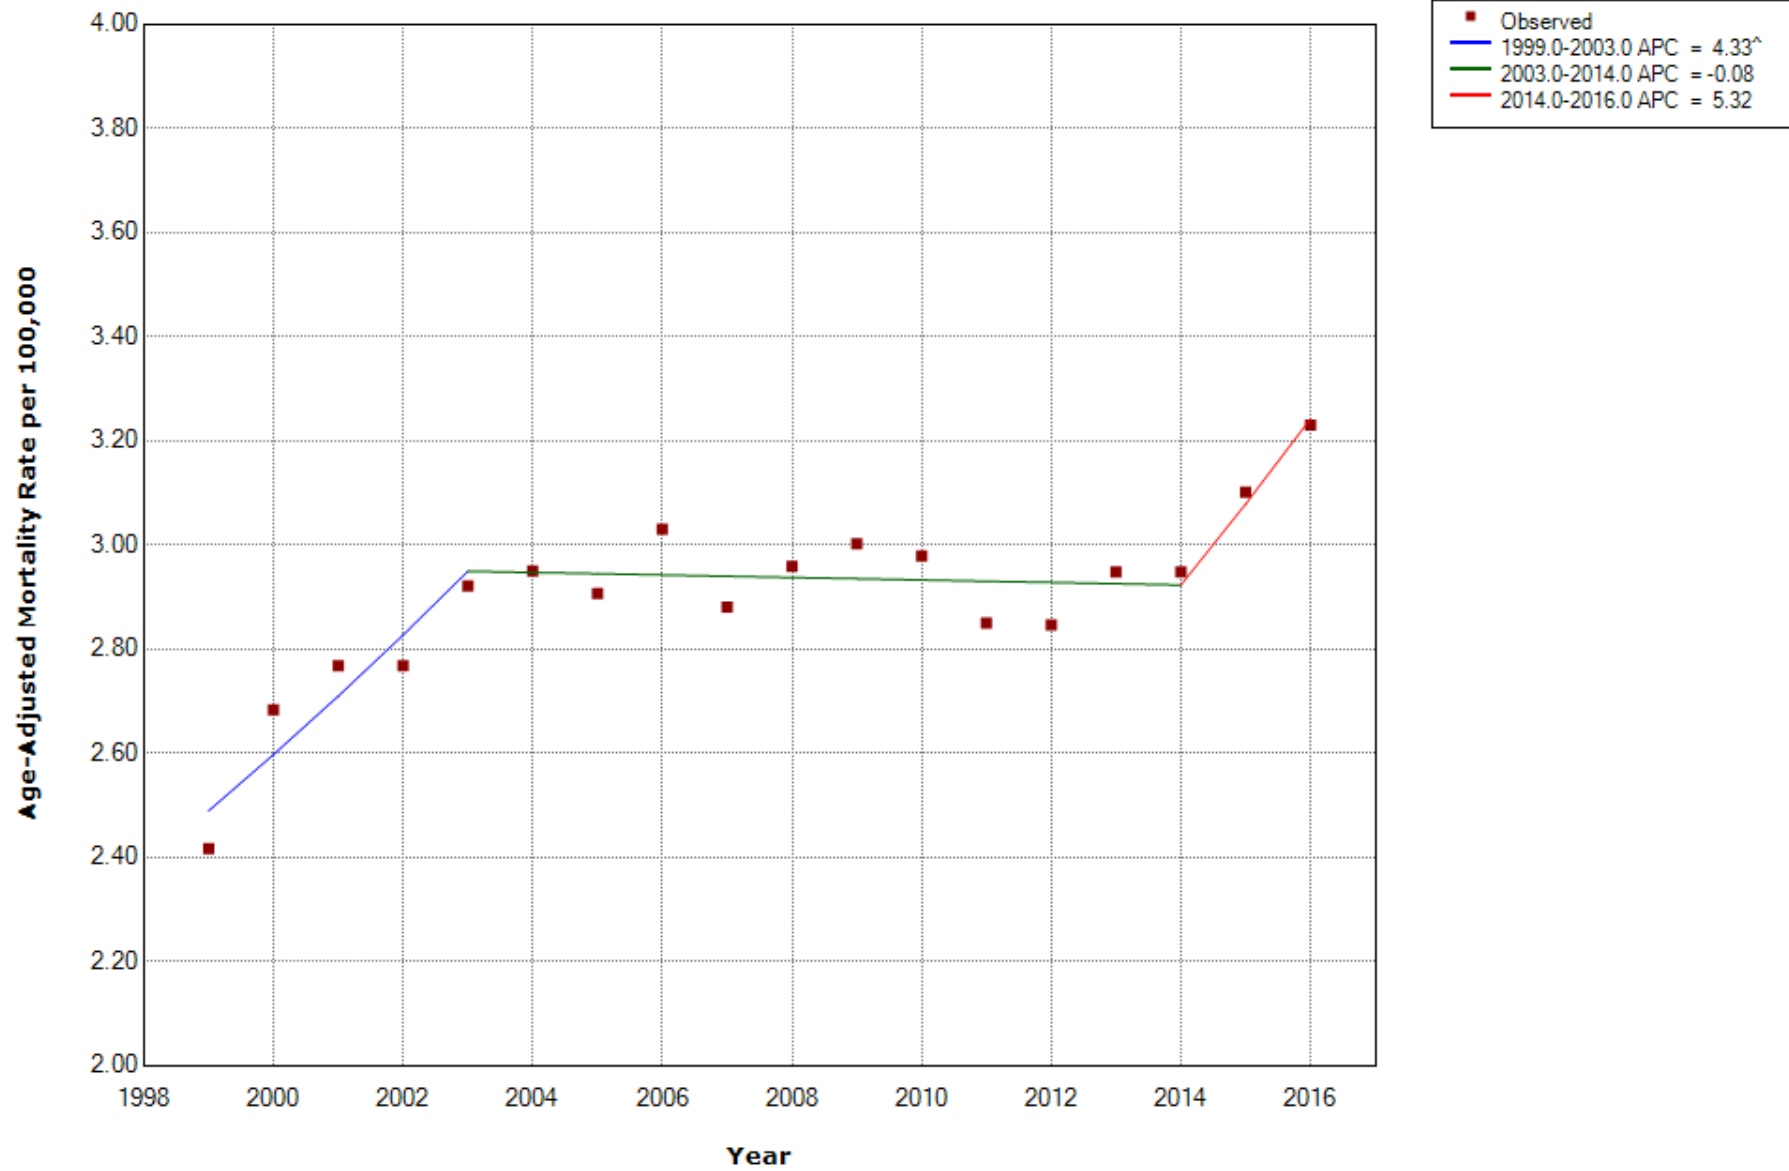

<sup>^</sup> Indicates that the Annual Percent Change (APC) is significantly different from zero at the alpha = 0.05 level.  
Final Selected Model: 2 Joinpoints.

### Skin diseases (L00-L98) / NH whites: 0 Joinpoints

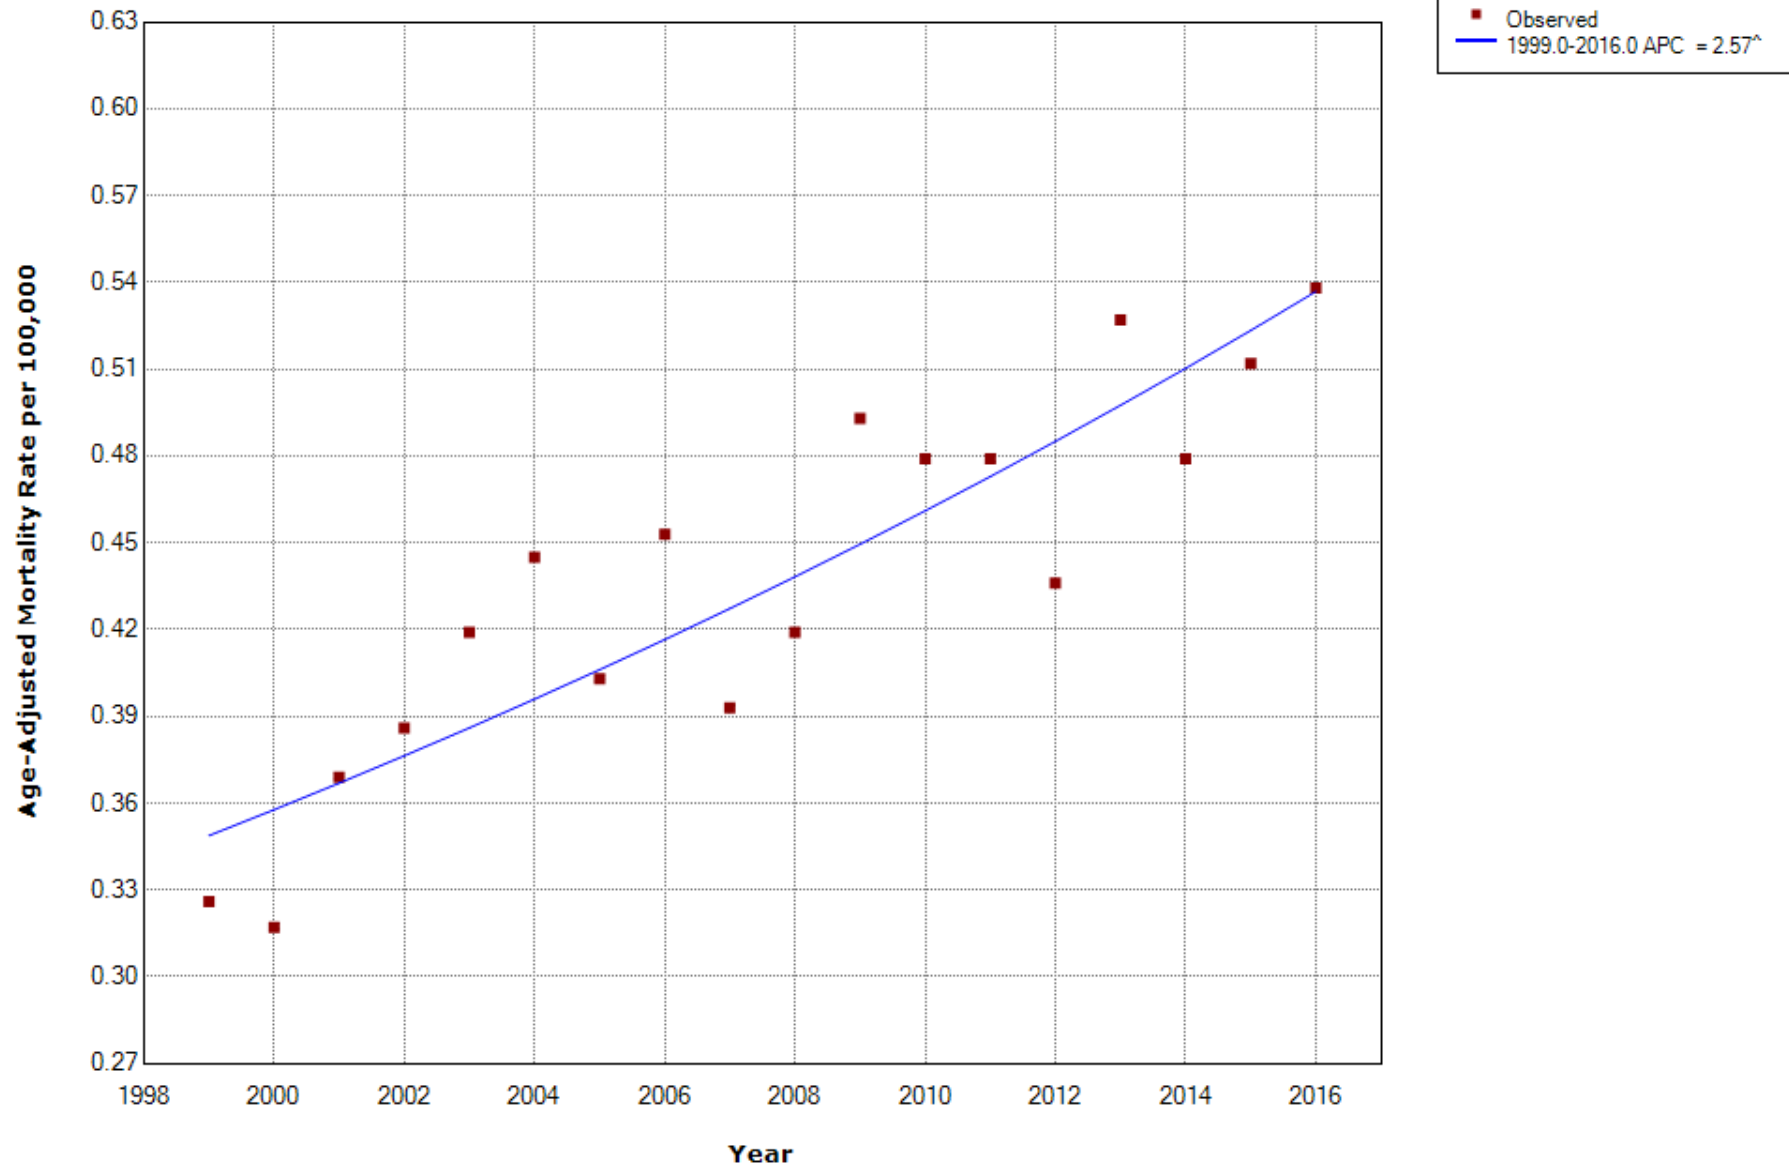

^ Indicates that the Annual Percent Change (APC) is significantly different from zero at the alpha = 0.05 level.  
Final Selected Model: 0 Joinpoints.

C17-21 (Malignant neoplasm of small intestine, colon, rectosigmoid junction, rectum, anus, anal canal) / NH AIAN: 0  
Joinpoints

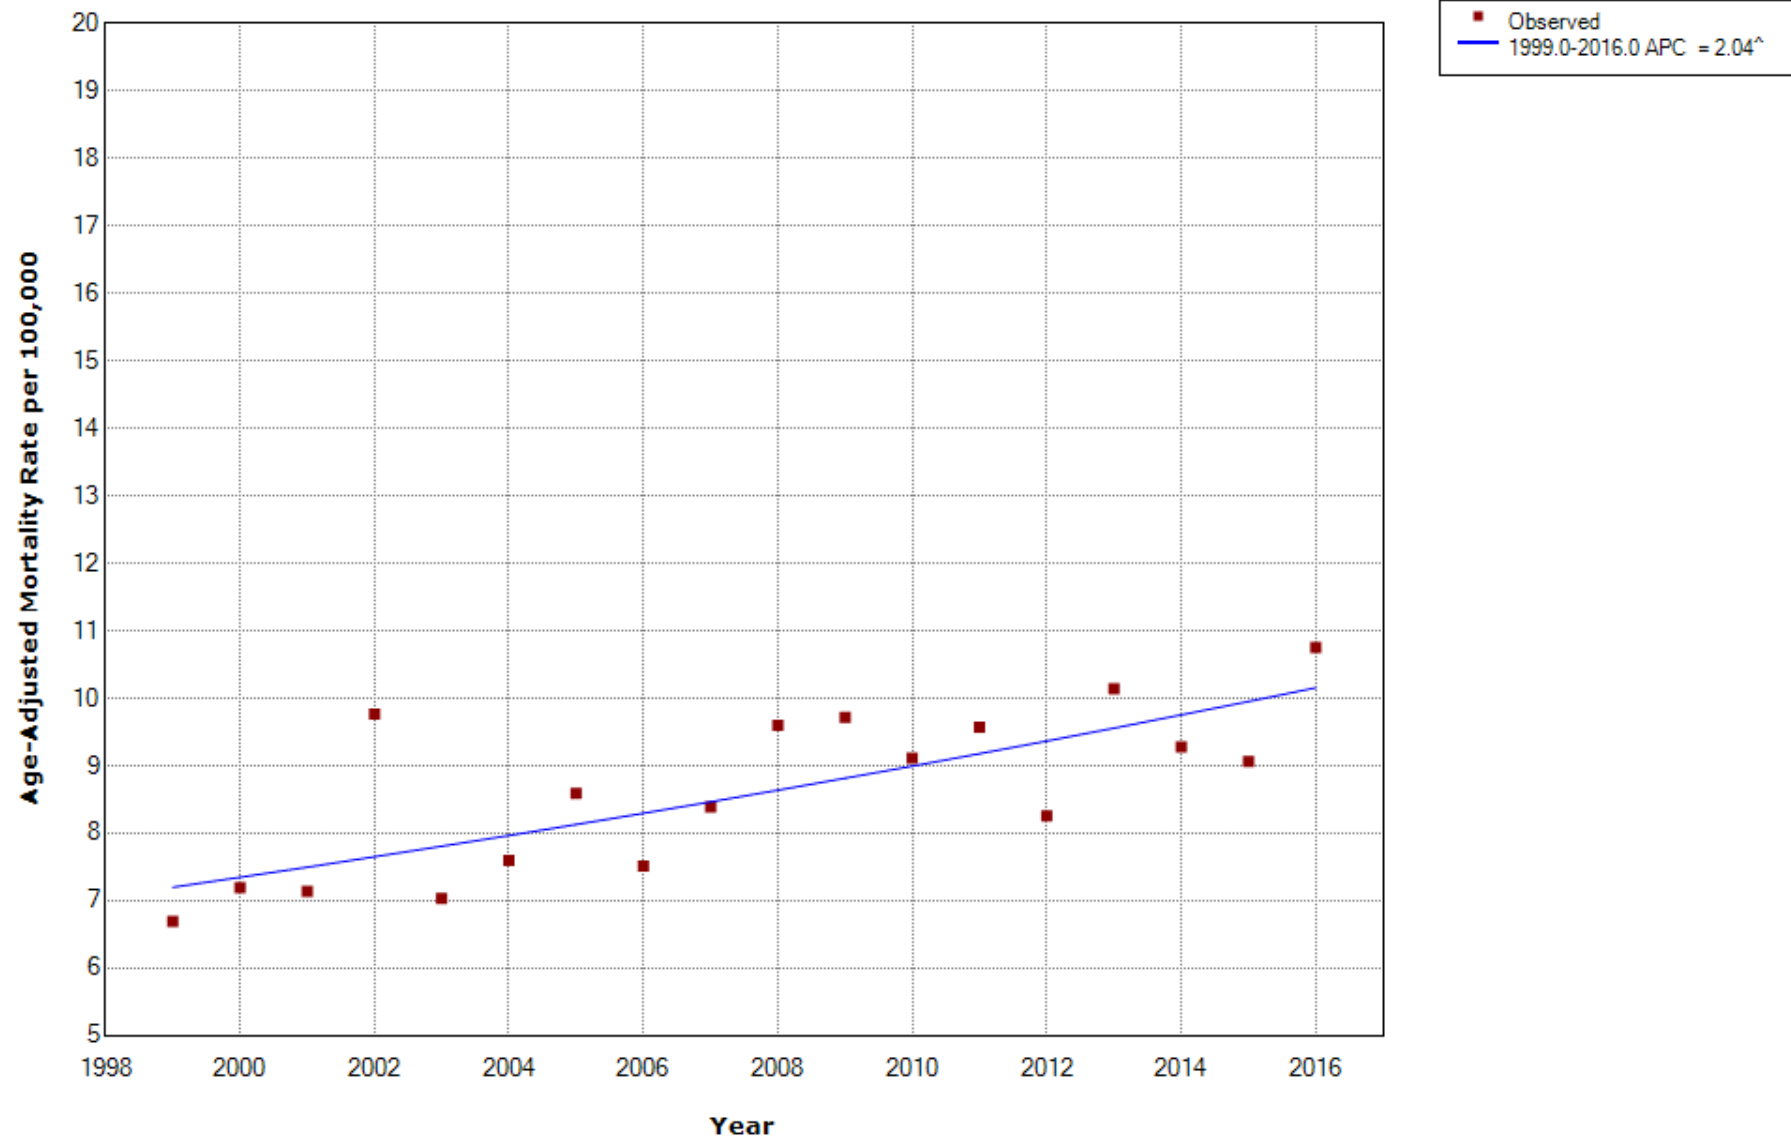

^ Indicates that the Annual Percent Change (APC) is significantly different from zero at the alpha = 0.05 level.  
Final Selected Model: 0 Joinpoints.

W20-W64, W75-W99, X10-X39, X50-59 (Other external causes of accidental injury) / NH Blacks: 0 Joinpoints

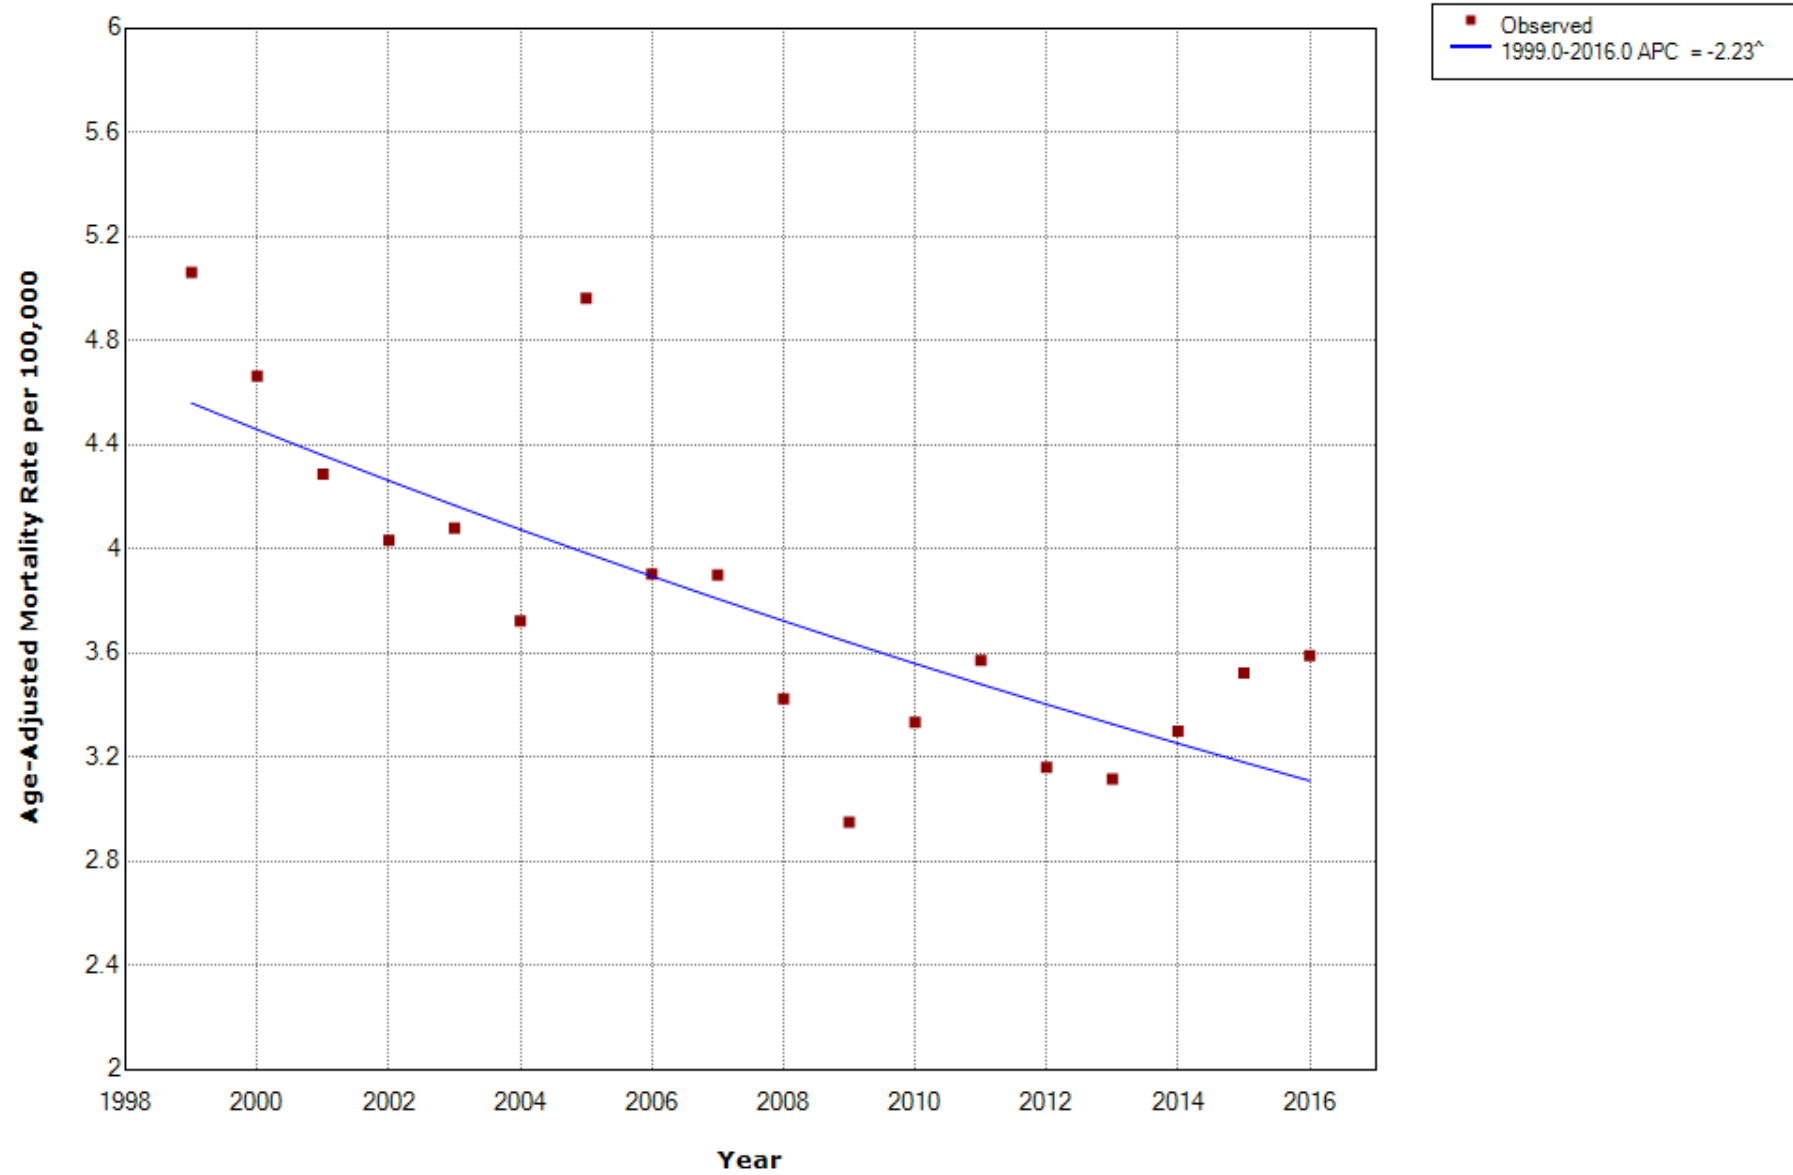

^ Indicates that the Annual Percent Change (APC) is significantly different from zero at the alpha = 0.05 level.  
Final Selected Model: 0 Joinpoints.



### V40-V49 (Car occupant injured in transport accident) / NH Blacks: 2 Joinpoints

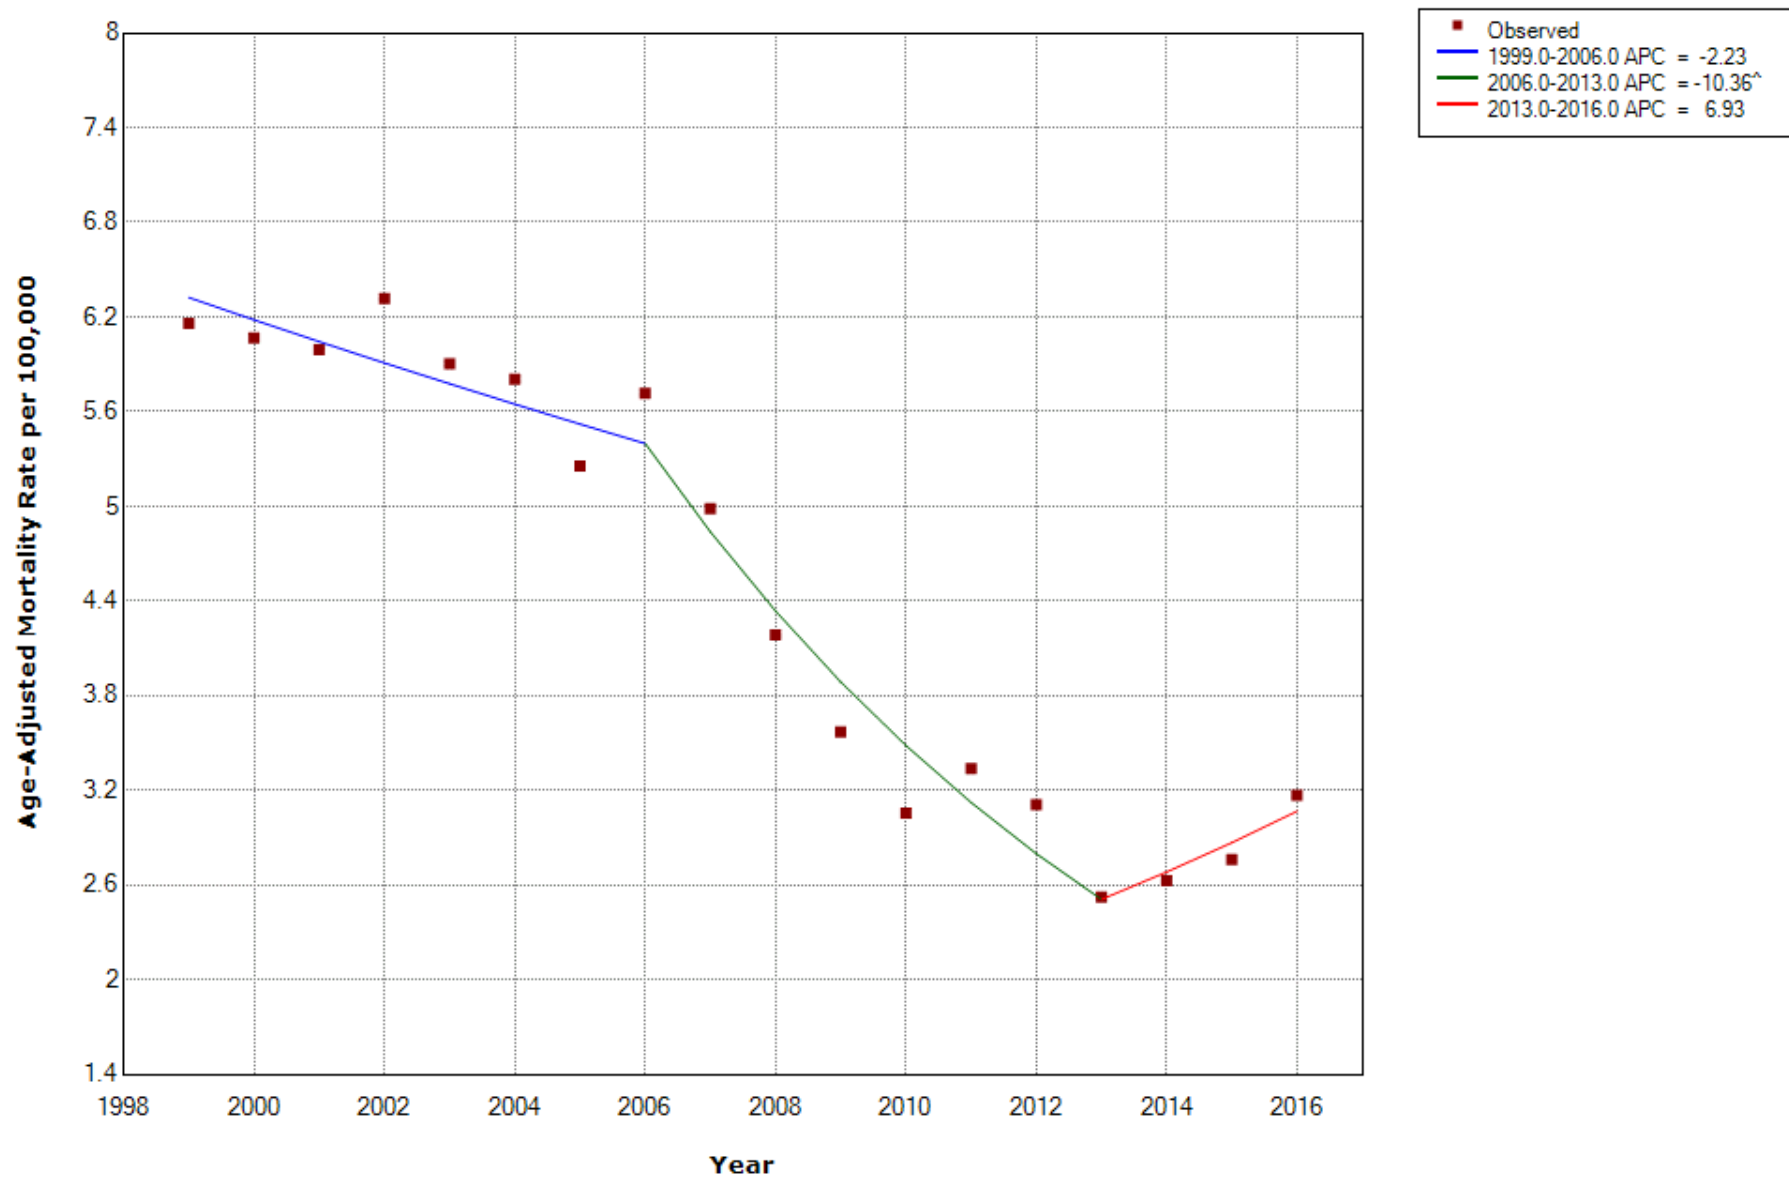

<sup>^</sup> Indicates that the Annual Percent Change (APC) is significantly different from zero at the alpha = 0.05 level.  
Final Selected Model: 2 Joinpoints.

### V40-V49 (Car occupant injured in transport accident) / Hispanics: 2 Joinpoints

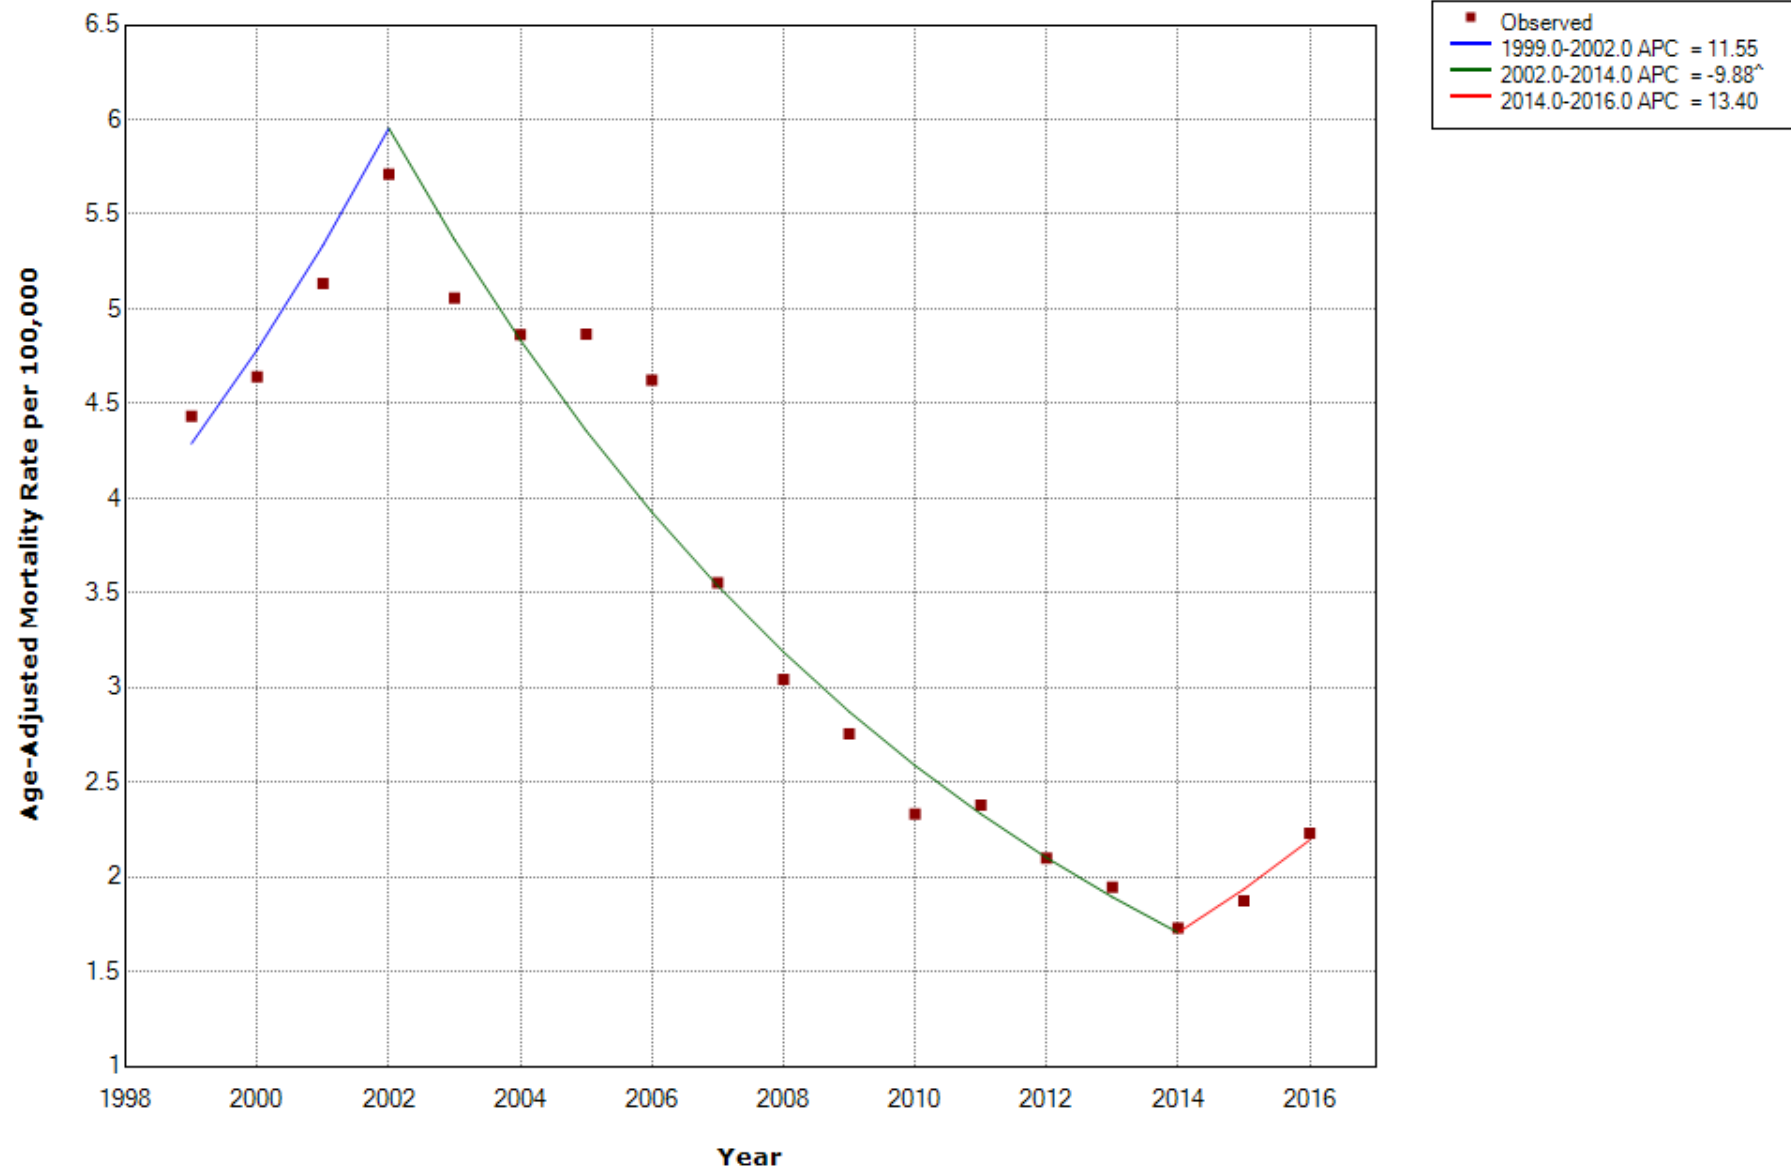

<sup>^</sup> Indicates that the Annual Percent Change (APC) is significantly different from zero at the alpha = 0.05 level.  
Final Selected Model: 2 Joinpoints.

C69-C72 (Malignant neoplasms of eye, brain and other parts of central nervous system) / NH API: 0 Joinpoints

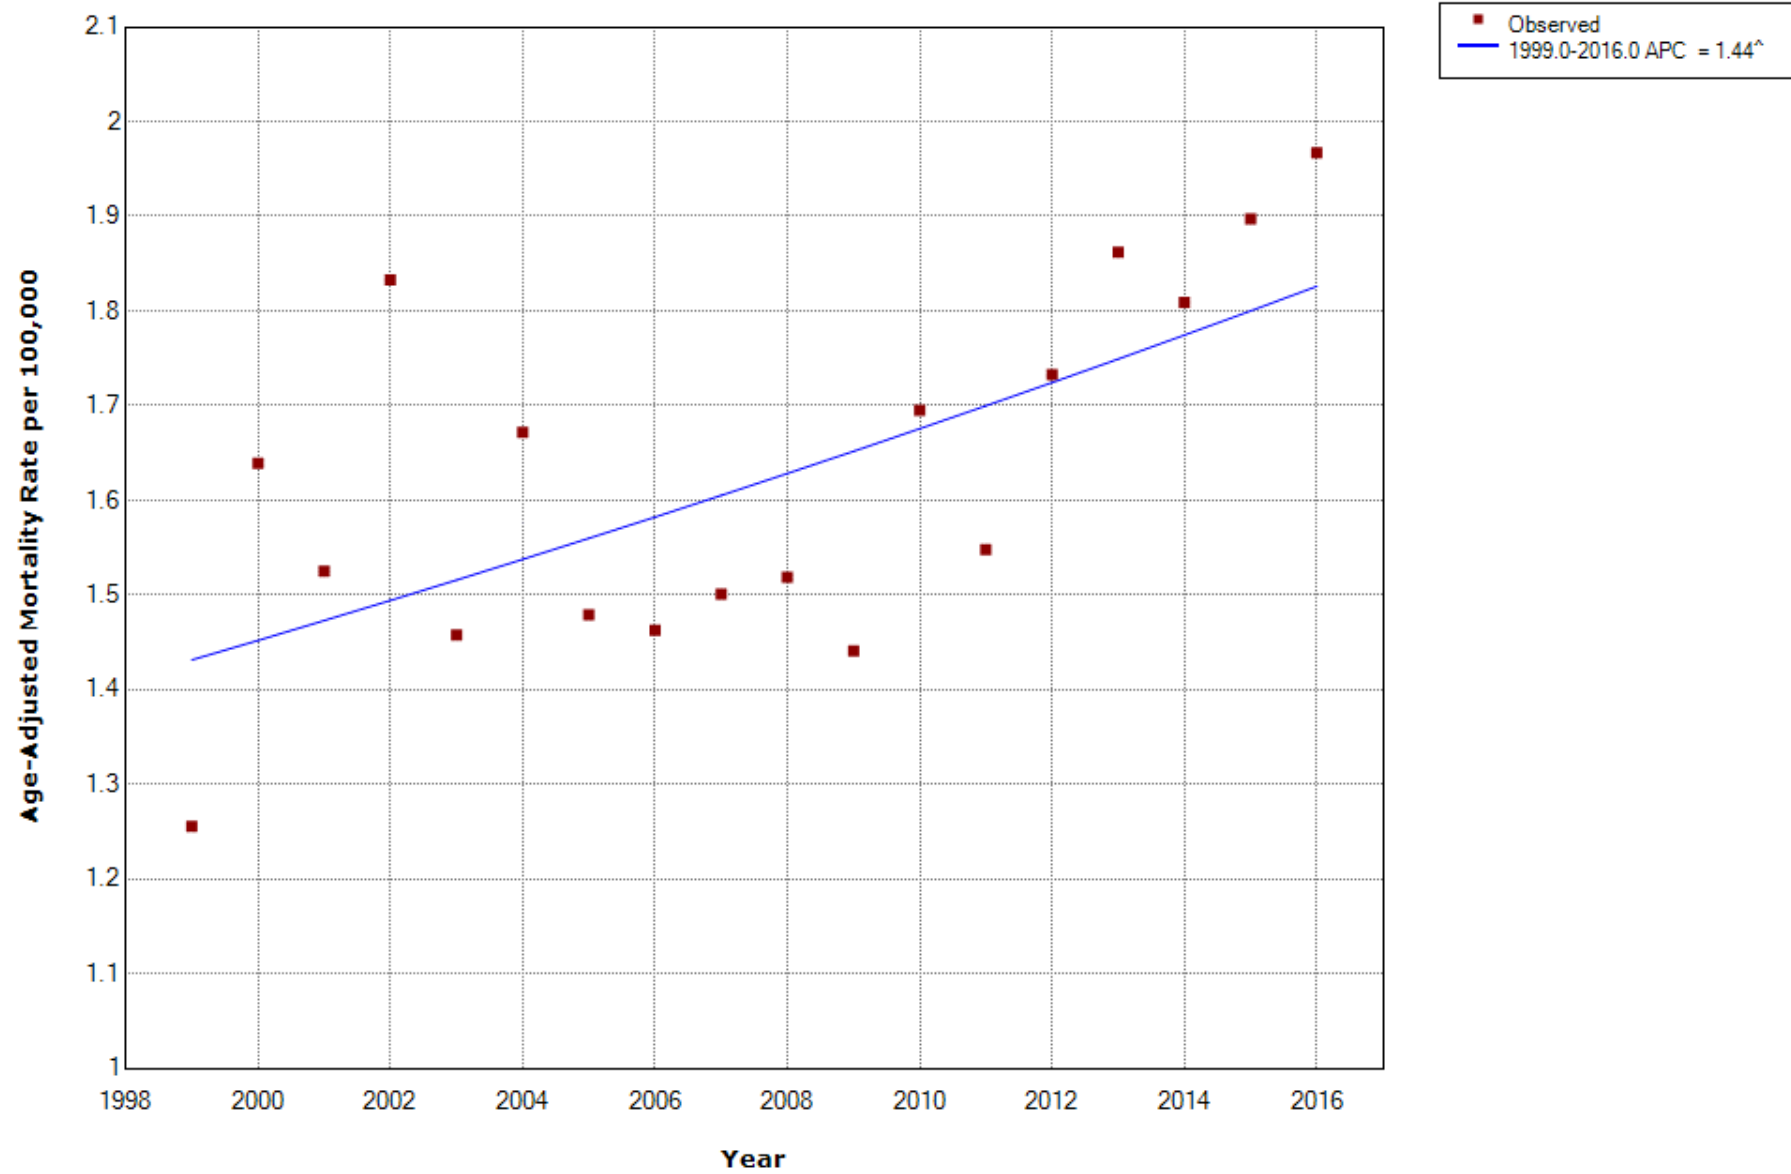

^ Indicates that the Annual Percent Change (APC) is significantly different from zero at the alpha = 0.05 level.  
Final Selected Model: 0 Joinpoints.
